# Supplementary material for: MCF-7 as a Model for Functional Analysis of Breast Cancer Risk Variants
Source: Oxford University Press journal article supplement (doi:10.1158/1055-9965.epi-19-0066), 2019-07-10
Supplement: 10559965epi190066-sup-215405_2_supp_5578312_pswjj9.xlsx [file 10559965epi190066-sup-215405_2_supp_5578312_pswjj9.xlsx]

## Sheet: CRVs_2017_BCa
#chr	start_b37	stop_b37	name	variant	locus	chr_num	paper_2017_novelety_of_locus	Best_published_SNP	gwasOR.95.CI.erpos	gwasP.value.erpos	icogsOR.95.CI.erpos	icogsP.value.erpos	oncoOR.95.CI.erpos	oncoP.value.erpos	combP.value.erpos	onco_icogs_gwas_P1df	sign
chr1	10538951	10538951	rs1152739	1_10538951_T_C	1_10566215_A_G	1	old	rs616488	0.96(0.9-1.03)	0.27	0.96(0.94-0.98)	0.0011	0.96(0.94-0.98)	5.2e-05	1.1e-07	1.95e-18	+++
chr1	10539543	10539543	rs607941	1_10539543_C_T	1_10566215_A_G	1	old	rs616488	0.96(0.9-1.03)	0.27	0.96(0.94-0.98)	0.0011	0.96(0.94-0.98)	5.2e-05	1.1e-07	2.02e-18	+++
chr1	10542714	10542714	rs652771	1_10542714_G_A	1_10566215_A_G	1	old	rs616488	0.96(0.9-1.03)	0.27	0.96(0.94-0.98)	0.0011	0.96(0.94-0.98)	5.2e-05	1.1e-07	2.1e-18	+++
chr1	10544388	10544388	rs2781232	1_10544388_T_C	1_10566215_A_G	1	old	rs616488	0.96(0.9-1.03)	0.27	0.96(0.94-0.98)	0.0011	0.96(0.94-0.98)	5.2e-05	1.1e-07	1.17e-18	+++
chr1	10544547	10544547	rs668805	1_10544547_G_A	1_10566215_A_G	1	old	rs616488	0.96(0.9-1.03)	0.27	0.96(0.94-0.98)	0.0011	0.96(0.94-0.98)	5.2e-05	1.1e-07	2.26e-18	+++
chr1	10544725	10544725	rs669701	1_10544725_A_G	1_10566215_A_G	1	old	rs616488	0.96(0.9-1.03)	0.27	0.96(0.94-0.98)	0.0011	0.96(0.94-0.98)	5.2e-05	1.1e-07	2.02e-18	+++
chr1	10545590	10545590	rs587916	1_10545590_G_A	1_10566215_A_G	1	old	rs616488	0.96(0.9-1.03)	0.27	0.96(0.94-0.98)	0.0011	0.96(0.94-0.98)	5.2e-05	1.1e-07	1.39e-18	+++
chr1	10547263	10547263	rs6540933	1_10547263_C_T	1_10566215_A_G	1	old	rs616488	0.96(0.9-1.03)	0.27	0.96(0.94-0.98)	0.0011	0.96(0.94-0.98)	5.2e-05	1.1e-07	1.2e-18	+++
chr1	10549628	10549628	rs585870	1_10549628_C_A	1_10566215_A_G	1	old	rs616488	0.96(0.9-1.03)	0.27	0.96(0.94-0.98)	0.0011	0.96(0.94-0.98)	5.2e-05	1.1e-07	1.75e-18	+++
chr1	10549848	10549848	rs1188526	1_10549848_G_C	1_10566215_A_G	1	old	rs616488	0.96(0.9-1.03)	0.27	0.96(0.94-0.98)	0.0011	0.96(0.94-0.98)	5.2e-05	1.1e-07	7.2e-19	+++
chr1	10550877	10550877	rs1188525	1_10550877_A_G	1_10566215_A_G	1	old	rs616488	0.96(0.9-1.03)	0.27	0.96(0.94-0.98)	0.0011	0.96(0.94-0.98)	5.2e-05	1.1e-07	5.73e-19	+++
chr1	10551763	10551763	rs657244	1_10551763_A_G	1_10566215_A_G	1	old	rs616488	0.96(0.9-1.03)	0.27	0.96(0.94-0.98)	0.0011	0.96(0.94-0.98)	5.2e-05	1.1e-07	1.03e-18	+++
chr1	10554505	10554505	rs597438	1_10554505_A_G	1_10566215_A_G	1	old	rs616488	0.96(0.9-1.03)	0.27	0.96(0.94-0.98)	0.0011	0.96(0.94-0.98)	5.2e-05	1.1e-07	5.36e-19	+++
chr1	10554709	10554709	rs596537	1_10554709_G_T	1_10566215_A_G	1	old	rs616488	0.96(0.9-1.03)	0.27	0.96(0.94-0.98)	0.0011	0.96(0.94-0.98)	5.2e-05	1.1e-07	9.78e-19	+++
chr1	10554794	10554794	rs620405	1_10554794_T_C	1_10566215_A_G	1	old	rs616488	0.96(0.9-1.03)	0.27	0.96(0.94-0.98)	0.0011	0.96(0.94-0.98)	5.2e-05	1.1e-07	7.79e-19	+++
chr1	10555257	10555257	rs622623	1_10555257_C_T	1_10566215_A_G	1	old	rs616488	0.96(0.9-1.03)	0.27	0.96(0.94-0.98)	0.0011	0.96(0.94-0.98)	5.2e-05	1.1e-07	1.03e-18	+++
chr1	10556447	10556447	rs648324	1_10556447_G_T	1_10566215_A_G	1	old	rs616488	0.96(0.9-1.03)	0.27	0.96(0.94-0.98)	0.0011	0.96(0.94-0.98)	5.2e-05	1.1e-07	4.41e-19	+++
chr1	10556485	10556485	rs648399	1_10556485_T_C	1_10566215_A_G	1	old	rs616488	0.96(0.9-1.03)	0.27	0.96(0.94-0.98)	0.0011	0.96(0.94-0.98)	5.2e-05	1.1e-07	3.48e-19	+++
chr1	10557251	10557251	rs662064	1_10557251_T_C	1_10566215_A_G	1	old	rs616488	0.96(0.9-1.03)	0.27	0.96(0.94-0.98)	0.0011	0.96(0.94-0.98)	5.2e-05	1.1e-07	5.52e-19	+++
chr1	10557544	10557544	rs660725	1_10557544_A_G	1_10566215_A_G	1	old	rs616488	0.96(0.9-1.03)	0.27	0.96(0.94-0.98)	0.0011	0.96(0.94-0.98)	5.2e-05	1.1e-07	3.95e-19	+++
chr1	10561282	10561282	rs589400	1_10561282_A_G	1_10566215_A_G	1	old	rs616488	0.96(0.9-1.03)	0.27	0.96(0.94-0.98)	0.0011	0.96(0.94-0.98)	5.2e-05	1.1e-07	8.32e-19	---
chr1	10561923	10561923	rs1632108	1_10561923_C_T	1_10566215_A_G	1	old	rs616488	0.96(0.9-1.03)	0.27	0.96(0.94-0.98)	0.0011	0.96(0.94-0.98)	5.2e-05	1.1e-07	1.2e-18	---
chr1	10561954	10561954	rs683864	1_10561954_T_C	1_10566215_A_G	1	old	rs616488	0.96(0.9-1.03)	0.27	0.96(0.94-0.98)	0.0011	0.96(0.94-0.98)	5.2e-05	1.1e-07	1.19e-18	---
chr1	10563364	10563364	rs202087283	1_10563364_G_A	1_10566215_A_G	1	old	rs616488	0.96(0.9-1.03)	0.27	0.96(0.94-0.98)	0.0011	0.96(0.94-0.98)	5.2e-05	1.1e-07	2e-18	---
chr1	10563492	10563492	rs2506901	1_10563492_A_G	1_10566215_A_G	1	old	rs616488	0.96(0.9-1.03)	0.27	0.96(0.94-0.98)	0.0011	0.96(0.94-0.98)	5.2e-05	1.1e-07	1.34e-18	---
chr1	10564675	10564675	rs2847344	1_10564675_G_A	1_10566215_A_G	1	old	rs616488	0.96(0.9-1.03)	0.27	0.96(0.94-0.98)	0.0011	0.96(0.94-0.98)	5.2e-05	1.1e-07	3.94e-19	+++
chr1	10566215	10566215	rs616488	1_10566215_A_G	1_10566215_A_G	1	old	rs616488	0.96(0.9-1.03)	0.27	0.96(0.94-0.98)	0.0011	0.96(0.94-0.98)	5.2e-05	1.1e-07	5.03e-20	---
chr1	10566272	10566272	rs616402	1_10566272_C_T	1_10566215_A_G	1	old	rs616488	0.96(0.9-1.03)	0.27	0.96(0.94-0.98)	0.0011	0.96(0.94-0.98)	5.2e-05	1.1e-07	1.48e-19	---
chr1	10566522	10566522	rs617728	1_10566522_C_T	1_10566215_A_G	1	old	rs616488	0.96(0.9-1.03)	0.27	0.96(0.94-0.98)	0.0011	0.96(0.94-0.98)	5.2e-05	1.1e-07	1.17e-19	---
chr1	10568277	10568277	rs2506880	1_10568277_T_G	1_10566215_A_G	1	old	rs616488	0.96(0.9-1.03)	0.27	0.96(0.94-0.98)	0.0011	0.96(0.94-0.98)	5.2e-05	1.1e-07	2.25e-19	---
chr1	10569258	10569258	rs2480785	1_10569258_G_A	1_10566215_A_G	1	old	rs616488	0.96(0.9-1.03)	0.27	0.96(0.94-0.98)	0.0011	0.96(0.94-0.98)	5.2e-05	1.1e-07	7.87e-20	---
chr1	10579545	10579545	rs1411402	1_10579545_G_T	1_10566215_A_G	1	old	rs616488	0.96(0.9-1.03)	0.27	0.96(0.94-0.98)	0.0011	0.96(0.94-0.98)	5.2e-05	1.1e-07	9.8e-20	---
chr1	10580891	10580891	rs2483677	1_10580891_C_T	1_10566215_A_G	1	old	rs616488	0.96(0.9-1.03)	0.27	0.96(0.94-0.98)	0.0011	0.96(0.94-0.98)	5.2e-05	1.1e-07	9.98e-20	---
chr1	10581051	10581051	rs2506885	1_10581051_A_T	1_10566215_A_G	1	old	rs616488	0.96(0.9-1.03)	0.27	0.96(0.94-0.98)	0.0011	0.96(0.94-0.98)	5.2e-05	1.1e-07	3.72e-20	---
chr1	10581658	10581658	rs2056417	1_10581658_G_A	1_10566215_A_G	1	old	rs616488	0.96(0.9-1.03)	0.27	0.96(0.94-0.98)	0.0011	0.96(0.94-0.98)	5.2e-05	1.1e-07	2.24e-19	---
chr1	10594790	10594790	rs2026792	1_10594790_A_G	1_10566215_A_G	1	old	rs616488	0.96(0.9-1.03)	0.27	0.96(0.94-0.98)	0.0011	0.96(0.94-0.98)	5.2e-05	1.1e-07	4.32e-20	---
chr1	10596022	10596022	rs2506889	1_10596022_C_T	1_10566215_A_G	1	old	rs616488	0.96(0.9-1.03)	0.27	0.96(0.94-0.98)	0.0011	0.96(0.94-0.98)	5.2e-05	1.1e-07	2.38e-20	---
chr1	10596341	10596341	rs12375	1_10596341_C_T	1_10566215_A_G	1	old	rs616488	0.96(0.9-1.03)	0.27	0.96(0.94-0.98)	0.0011	0.96(0.94-0.98)	5.2e-05	1.1e-07	2.51e-20	---
chr1	10597551	10597551	rs2480777	1_10597551_C_T	1_10566215_A_G	1	old	rs616488	0.96(0.9-1.03)	0.27	0.96(0.94-0.98)	0.0011	0.96(0.94-0.98)	5.2e-05	1.1e-07	3.07e-20	---
chr1	10598216	10598216	rs2506892	1_10598216_G_A	1_10566215_A_G	1	old	rs616488	0.96(0.9-1.03)	0.27	0.96(0.94-0.98)	0.0011	0.96(0.94-0.98)	5.2e-05	1.1e-07	2.51e-20	---
chr1	10603716	10603716	rs2506896	1_10603716_T_C	1_10566215_A_G	1	old	rs616488	0.96(0.9-1.03)	0.27	0.96(0.94-0.98)	0.0011	0.96(0.94-0.98)	5.2e-05	1.1e-07	4.64e-20	---
chr1	10609973	10609973	rs2150038	1_10609973_G_T	1_10566215_A_G	1	old	rs616488	0.96(0.9-1.03)	0.27	0.96(0.94-0.98)	0.0011	0.96(0.94-0.98)	5.2e-05	1.1e-07	7.96e-20	---
chr1	10612820	10612820	rs9430149	1_10612820_G_C	1_10566215_A_G	1	old	rs616488	0.96(0.9-1.03)	0.27	0.96(0.94-0.98)	0.0011	0.96(0.94-0.98)	5.2e-05	1.1e-07	5.05e-20	---
chr1	10614804	10614804	rs67488812	1_10614804_A_G	1_10566215_A_G	1	old	rs616488	0.96(0.9-1.03)	0.27	0.96(0.94-0.98)	0.0011	0.96(0.94-0.98)	5.2e-05	1.1e-07	5.44e-20	---
chr1	10616505	10616505	rs17035305	1_10616505_C_A	1_10566215_A_G	1	old	rs616488	0.96(0.9-1.03)	0.27	0.96(0.94-0.98)	0.0011	0.96(0.94-0.98)	5.2e-05	1.1e-07	5.06e-20	---
chr1	10617034	10617034	rs12028449	1_10617034_G_A	1_10566215_A_G	1	old	rs616488	0.96(0.9-1.03)	0.27	0.96(0.94-0.98)	0.0011	0.96(0.94-0.98)	5.2e-05	1.1e-07	6.22e-20	---
chr1	10618109	10618109	rs11121587	1_10618109_A_G	1_10566215_A_G	1	old	rs616488	0.96(0.9-1.03)	0.27	0.96(0.94-0.98)	0.0011	0.96(0.94-0.98)	5.2e-05	1.1e-07	4.76e-20	---
chr1	10621061	10621061	rs34575776	1_10621061_A_G	1_10566215_A_G	1	old	rs616488	0.96(0.9-1.03)	0.27	0.96(0.94-0.98)	0.0011	0.96(0.94-0.98)	5.2e-05	1.1e-07	2.11e-19	---
chr1	10632235	10632235	rs4846235	1_10632235_C_T	1_10566215_A_G	1	old	rs616488	0.96(0.9-1.03)	0.27	0.96(0.94-0.98)	0.0011	0.96(0.94-0.98)	5.2e-05	1.1e-07	8.64e-20	---
chr1	10637709	10637709	rs112436634	1_10637709_C_T	1_10566215_A_G	1	old	rs616488	0.96(0.9-1.03)	0.27	0.96(0.94-0.98)	0.0011	0.96(0.94-0.98)	5.2e-05	1.1e-07	1.61e-19	---
chr1	18807339	18807339	rs2992756	1_18807339_T_C	1_18807339_T_C	1	new	rs2992756	1.06(0.99-1.12)	0.075	1.05(1.03-1.08)	2.4e-05	1.07(1.05-1.09)	2.7e-11	9.9e-16	1.6e-15	---
chr1	41380440	41380440	rs4233486	1_41380440_C_T	1_41380440_C_T	1	new	rs4233486	0.92(0.86-0.98)	0.0062	0.94(0.92-0.97)	1.8e-05	0.97(0.95-0.99)	0.005	7.9e-08	9.09e-09	+++
chr1	41381680	41381680	rs35054111	1_41381680_T_TA	1_41380440_C_T	1	new	rs4233486	0.92(0.86-0.98)	0.0062	0.94(0.92-0.97)	1.8e-05	0.97(0.95-0.99)	0.005	7.9e-08	2.95e-08	+++
chr1	41386532	41386532	rs11804913	1_41386532_T_A	1_41380440_C_T	1	new	rs4233486	0.92(0.86-0.98)	0.0062	0.94(0.92-0.97)	1.8e-05	0.97(0.95-0.99)	0.005	7.9e-08	8.91e-07	+++
chr1	41387003	41387003	rs7554973	1_41387003_T_C	1_41380440_C_T	1	new	rs4233486	0.92(0.86-0.98)	0.0062	0.94(0.92-0.97)	1.8e-05	0.97(0.95-0.99)	0.005	7.9e-08	8.17e-07	+++
chr1	41997764	41997764	rs181270898	1_41997764_G_A	1_42137311_T_G	1	new	rs79724016	0.80(0.66-0.96)	0.018	0.90(0.85-0.96)	0.0014	0.91(0.86-0.96)	0.0014	8.5e-07	4.61e-07	---
chr1	42018135	42018135	rs144427343	1_42018135_G_A	1_42137311_T_G	1	new	rs79724016	0.80(0.66-0.96)	0.018	0.90(0.85-0.96)	0.0014	0.91(0.86-0.96)	0.0014	8.5e-07	3.86e-06	+++
chr1	42070841	42070841	rs149113869	1_42070841_G_A	1_42137311_T_G	1	new	rs79724016	0.80(0.66-0.96)	0.018	0.90(0.85-0.96)	0.0014	0.91(0.86-0.96)	0.0014	8.5e-07	2.35e-06	---
chr1	42071132	42071132	rs111872439	1_42071132_G_A	1_42137311_T_G	1	new	rs79724016	0.80(0.66-0.96)	0.018	0.90(0.85-0.96)	0.0014	0.91(0.86-0.96)	0.0014	8.5e-07	2.33e-06	---
chr1	42074084	42074084	rs55766261	1_42074084_C_T	1_42137311_T_G	1	new	rs79724016	0.80(0.66-0.96)	0.018	0.90(0.85-0.96)	0.0014	0.91(0.86-0.96)	0.0014	8.5e-07	2.28e-06	---
chr1	42079660	42079660	rs112147695	1_42079660_C_G	1_42137311_T_G	1	new	rs79724016	0.80(0.66-0.96)	0.018	0.90(0.85-0.96)	0.0014	0.91(0.86-0.96)	0.0014	8.5e-07	1.78e-06	---
chr1	42082588	42082588	rs113164207	1_42082588_A_G	1_42137311_T_G	1	new	rs79724016	0.80(0.66-0.96)	0.018	0.90(0.85-0.96)	0.0014	0.91(0.86-0.96)	0.0014	8.5e-07	1.46e-06	---
chr1	42084411	42084411	rs113620420	1_42084411_C_G	1_42137311_T_G	1	new	rs79724016	0.80(0.66-0.96)	0.018	0.90(0.85-0.96)	0.0014	0.91(0.86-0.96)	0.0014	8.5e-07	1.33e-06	---
chr1	42086112	42086112	rs77174549	1_42086112_G_A	1_42137311_T_G	1	new	rs79724016	0.80(0.66-0.96)	0.018	0.90(0.85-0.96)	0.0014	0.91(0.86-0.96)	0.0014	8.5e-07	1.27e-06	---
chr1	42098408	42098408	rs113826633	1_42098408_C_T	1_42137311_T_G	1	new	rs79724016	0.80(0.66-0.96)	0.018	0.90(0.85-0.96)	0.0014	0.91(0.86-0.96)	0.0014	8.5e-07	6.74e-07	---
chr1	42102847	42102847	rs55657561	1_42102847_A_AC	1_42137311_T_G	1	new	rs79724016	0.80(0.66-0.96)	0.018	0.90(0.85-0.96)	0.0014	0.91(0.86-0.96)	0.0014	8.5e-07	6.28e-07	---
chr1	42103403	42103403	rs56384647	1_42103403_T_G	1_42137311_T_G	1	new	rs79724016	0.80(0.66-0.96)	0.018	0.90(0.85-0.96)	0.0014	0.91(0.86-0.96)	0.0014	8.5e-07	4.55e-07	---
chr1	42103769	42103769	rs749200	1_42103769_A_G	1_42137311_T_G	1	new	rs79724016	0.80(0.66-0.96)	0.018	0.90(0.85-0.96)	0.0014	0.91(0.86-0.96)	0.0014	8.5e-07	5.85e-07	+++
chr1	42112269	42112269	rs113208159	1_42112269_A_G	1_42137311_T_G	1	new	rs79724016	0.80(0.66-0.96)	0.018	0.90(0.85-0.96)	0.0014	0.91(0.86-0.96)	0.0014	8.5e-07	4.6e-07	---
chr1	42113326	42113326	rs7539032	1_42113326_A_C	1_42137311_T_G	1	new	rs79724016	0.80(0.66-0.96)	0.018	0.90(0.85-0.96)	0.0014	0.91(0.86-0.96)	0.0014	8.5e-07	1.15e-06	---
chr1	42114000	42114000	rs13375774	1_42114000_C_T	1_42137311_T_G	1	new	rs79724016	0.80(0.66-0.96)	0.018	0.90(0.85-0.96)	0.0014	0.91(0.86-0.96)	0.0014	8.5e-07	3.04e-07	---
chr1	42114733	42114733	rs78927801	1_42114733_C_T	1_42137311_T_G	1	new	rs79724016	0.80(0.66-0.96)	0.018	0.90(0.85-0.96)	0.0014	0.91(0.86-0.96)	0.0014	8.5e-07	2.43e-07	---
chr1	42117371	42117371	rs6701758	1_42117371_T_C	1_42137311_T_G	1	new	rs79724016	0.80(0.66-0.96)	0.018	0.90(0.85-0.96)	0.0014	0.91(0.86-0.96)	0.0014	8.5e-07	2.52e-07	---
chr1	42118424	42118424	rs111593435	1_42118424_T_C	1_42137311_T_G	1	new	rs79724016	0.80(0.66-0.96)	0.018	0.90(0.85-0.96)	0.0014	0.91(0.86-0.96)	0.0014	8.5e-07	2.18e-07	---
chr1	42124311	42124311	rs111492277	1_42124311_G_A	1_42137311_T_G	1	new	rs79724016	0.80(0.66-0.96)	0.018	0.90(0.85-0.96)	0.0014	0.91(0.86-0.96)	0.0014	8.5e-07	2.7e-07	---
chr1	42135781	42135781	rs113584804	1_42135781_G_A	1_42137311_T_G	1	new	rs79724016	0.80(0.66-0.96)	0.018	0.90(0.85-0.96)	0.0014	0.91(0.86-0.96)	0.0014	8.5e-07	7.59e-08	---
chr1	42137311	42137311	rs79724016	1_42137311_T_G	1_42137311_T_G	1	new	rs79724016	0.80(0.66-0.96)	0.018	0.90(0.85-0.96)	0.0014	0.91(0.86-0.96)	0.0014	8.5e-07	3.86e-08	---
chr1	42140564	42140564	rs112702760	1_42140564_C_G	1_42137311_T_G	1	new	rs79724016	0.80(0.66-0.96)	0.018	0.90(0.85-0.96)	0.0014	0.91(0.86-0.96)	0.0014	8.5e-07	5.26e-08	---
chr1	42140601	42140601	rs56394244	1_42140601_C_T	1_42137311_T_G	1	new	rs79724016	0.80(0.66-0.96)	0.018	0.90(0.85-0.96)	0.0014	0.91(0.86-0.96)	0.0014	8.5e-07	5.06e-08	---
chr1	42142663	42142663	rs74071909	1_42142663_G_T	1_42137311_T_G	1	new	rs79724016	0.80(0.66-0.96)	0.018	0.90(0.85-0.96)	0.0014	0.91(0.86-0.96)	0.0014	8.5e-07	6.25e-08	---
chr1	42143093	42143093	rs7548872	1_42143093_G_A	1_42137311_T_G	1	new	rs79724016	0.80(0.66-0.96)	0.018	0.90(0.85-0.96)	0.0014	0.91(0.86-0.96)	0.0014	8.5e-07	6.51e-08	---
chr1	42214930	42214930	rs113414440	1_42214930_T_C	1_42137311_T_G	1	new	rs79724016	0.80(0.66-0.96)	0.018	0.90(0.85-0.96)	0.0014	0.91(0.86-0.96)	0.0014	8.5e-07	6.06e-07	---
chr1	42233514	42233514	rs113516359	1_42233514_C_T	1_42137311_T_G	1	new	rs79724016	0.80(0.66-0.96)	0.018	0.90(0.85-0.96)	0.0014	0.91(0.86-0.96)	0.0014	8.5e-07	5.31e-07	---
chr1	46154575	46154575	rs10683143	1_46154575_AT_A	1_46600917_A_G	1	new	rs1707302	0.97(0.91-1.03)	0.28	0.95(0.93-0.97)	1.8e-05	0.96(0.94-0.98)	5.7e-05	2.7e-09	2.29e-06	---
chr1	46253011	46253011	rs6690386	1_46253011_C_T	1_46600917_A_G	1	new	rs1707302	0.97(0.91-1.03)	0.28	0.95(0.93-0.97)	1.8e-05	0.96(0.94-0.98)	5.7e-05	2.7e-09	2.91e-06	---
chr1	46254920	46254920	rs149899290	1_46254920_C_CA	1_46600917_A_G	1	new	rs1707302	0.97(0.91-1.03)	0.28	0.95(0.93-0.97)	1.8e-05	0.96(0.94-0.98)	5.7e-05	2.7e-09	9.48e-07	---
chr1	46261933	46261933	rs7551025	1_46261933_A_G	1_46600917_A_G	1	new	rs1707302	0.97(0.91-1.03)	0.28	0.95(0.93-0.97)	1.8e-05	0.96(0.94-0.98)	5.7e-05	2.7e-09	6.5e-07	---
chr1	46262129	46262129	rs7539800	1_46262129_C_G	1_46600917_A_G	1	new	rs1707302	0.97(0.91-1.03)	0.28	0.95(0.93-0.97)	1.8e-05	0.96(0.94-0.98)	5.7e-05	2.7e-09	9.06e-07	---
chr1	46262378	46262378	rs10890350	1_46262378_G_A	1_46600917_A_G	1	new	rs1707302	0.97(0.91-1.03)	0.28	0.95(0.93-0.97)	1.8e-05	0.96(0.94-0.98)	5.7e-05	2.7e-09	6.9e-07	---
chr1	46262551	46262551	rs12077916	1_46262551_A_G	1_46600917_A_G	1	new	rs1707302	0.97(0.91-1.03)	0.28	0.95(0.93-0.97)	1.8e-05	0.96(0.94-0.98)	5.7e-05	2.7e-09	5.78e-07	---
chr1	46266255	46266255	rs11211190	1_46266255_C_T	1_46600917_A_G	1	new	rs1707302	0.97(0.91-1.03)	0.28	0.95(0.93-0.97)	1.8e-05	0.96(0.94-0.98)	5.7e-05	2.7e-09	6.36e-07	---
chr1	46266456	46266456	rs4390216	1_46266456_C_T	1_46600917_A_G	1	new	rs1707302	0.97(0.91-1.03)	0.28	0.95(0.93-0.97)	1.8e-05	0.96(0.94-0.98)	5.7e-05	2.7e-09	6.3e-07	---
chr1	46271120	46271120	rs11369189	1_46271120_C_CT	1_46600917_A_G	1	new	rs1707302	0.97(0.91-1.03)	0.28	0.95(0.93-0.97)	1.8e-05	0.96(0.94-0.98)	5.7e-05	2.7e-09	2.52e-07	---
chr1	46272879	46272879	rs6672115	1_46272879_T_C	1_46600917_A_G	1	new	rs1707302	0.97(0.91-1.03)	0.28	0.95(0.93-0.97)	1.8e-05	0.96(0.94-0.98)	5.7e-05	2.7e-09	8.61e-07	---
chr1	46273666	46273666	rs10437063	1_46273666_G_A	1_46600917_A_G	1	new	rs1707302	0.97(0.91-1.03)	0.28	0.95(0.93-0.97)	1.8e-05	0.96(0.94-0.98)	5.7e-05	2.7e-09	6.54e-07	---
chr1	46275401	46275401	rs6676982	1_46275401_A_T	1_46600917_A_G	1	new	rs1707302	0.97(0.91-1.03)	0.28	0.95(0.93-0.97)	1.8e-05	0.96(0.94-0.98)	5.7e-05	2.7e-09	6.58e-07	---
chr1	46275648	46275648	rs6429580	1_46275648_A_G	1_46600917_A_G	1	new	rs1707302	0.97(0.91-1.03)	0.28	0.95(0.93-0.97)	1.8e-05	0.96(0.94-0.98)	5.7e-05	2.7e-09	6.98e-07	---
chr1	46276838	46276838	rs375439362	1_46276838_CT_C	1_46600917_A_G	1	new	rs1707302	0.97(0.91-1.03)	0.28	0.95(0.93-0.97)	1.8e-05	0.96(0.94-0.98)	5.7e-05	2.7e-09	1.55e-06	---
chr1	46279168	46279168	rs34566447	1_46279168_ATTT_A	1_46600917_A_G	1	new	rs1707302	0.97(0.91-1.03)	0.28	0.95(0.93-0.97)	1.8e-05	0.96(0.94-0.98)	5.7e-05	2.7e-09	2.3e-07	---
chr1	46279391	46279391	rs6701694	1_46279391_G_A	1_46600917_A_G	1	new	rs1707302	0.97(0.91-1.03)	0.28	0.95(0.93-0.97)	1.8e-05	0.96(0.94-0.98)	5.7e-05	2.7e-09	6.6e-07	---
chr1	46282084	46282084	rs11211194	1_46282084_C_T	1_46600917_A_G	1	new	rs1707302	0.97(0.91-1.03)	0.28	0.95(0.93-0.97)	1.8e-05	0.96(0.94-0.98)	5.7e-05	2.7e-09	7.53e-07	---
chr1	46285610	46285610	rs7546237	1_46285610_A_C	1_46600917_A_G	1	new	rs1707302	0.97(0.91-1.03)	0.28	0.95(0.93-0.97)	1.8e-05	0.96(0.94-0.98)	5.7e-05	2.7e-09	6.35e-07	---
chr1	46287371	46287371	rs4994390	1_46287371_A_G	1_46600917_A_G	1	new	rs1707302	0.97(0.91-1.03)	0.28	0.95(0.93-0.97)	1.8e-05	0.96(0.94-0.98)	5.7e-05	2.7e-09	5.59e-07	---
chr1	46288352	46288352	rs11211200	1_46288352_T_C	1_46600917_A_G	1	new	rs1707302	0.97(0.91-1.03)	0.28	0.95(0.93-0.97)	1.8e-05	0.96(0.94-0.98)	5.7e-05	2.7e-09	6.39e-07	---
chr1	46289055	46289055	rs12094860	1_46289055_T_G	1_46600917_A_G	1	new	rs1707302	0.97(0.91-1.03)	0.28	0.95(0.93-0.97)	1.8e-05	0.96(0.94-0.98)	5.7e-05	2.7e-09	6.44e-07	---
chr1	46289175	46289175	rs12094901	1_46289175_T_C	1_46600917_A_G	1	new	rs1707302	0.97(0.91-1.03)	0.28	0.95(0.93-0.97)	1.8e-05	0.96(0.94-0.98)	5.7e-05	2.7e-09	6.45e-07	---
chr1	46290311	46290311	rs10561161	1_46290311_GTA_G	1_46600917_A_G	1	new	rs1707302	0.97(0.91-1.03)	0.28	0.95(0.93-0.97)	1.8e-05	0.96(0.94-0.98)	5.7e-05	2.7e-09	2.37e-07	---
chr1	46290477	46290477	rs6697830	1_46290477_C_A	1_46600917_A_G	1	new	rs1707302	0.97(0.91-1.03)	0.28	0.95(0.93-0.97)	1.8e-05	0.96(0.94-0.98)	5.7e-05	2.7e-09	5.59e-07	---
chr1	46291062	46291062	rs12060274	1_46291062_G_T	1_46600917_A_G	1	new	rs1707302	0.97(0.91-1.03)	0.28	0.95(0.93-0.97)	1.8e-05	0.96(0.94-0.98)	5.7e-05	2.7e-09	5.6e-07	---
chr1	46291162	46291162	rs12097761	1_46291162_T_C	1_46600917_A_G	1	new	rs1707302	0.97(0.91-1.03)	0.28	0.95(0.93-0.97)	1.8e-05	0.96(0.94-0.98)	5.7e-05	2.7e-09	8.28e-07	---
chr1	46292382	46292382	rs11211202	1_46292382_C_T	1_46600917_A_G	1	new	rs1707302	0.97(0.91-1.03)	0.28	0.95(0.93-0.97)	1.8e-05	0.96(0.94-0.98)	5.7e-05	2.7e-09	6.58e-07	---
chr1	46296067	46296067	rs6674794	1_46296067_G_A	1_46600917_A_G	1	new	rs1707302	0.97(0.91-1.03)	0.28	0.95(0.93-0.97)	1.8e-05	0.96(0.94-0.98)	5.7e-05	2.7e-09	8.58e-07	---
chr1	46297331	46297331	rs4660889	1_46297331_C_T	1_46600917_A_G	1	new	rs1707302	0.97(0.91-1.03)	0.28	0.95(0.93-0.97)	1.8e-05	0.96(0.94-0.98)	5.7e-05	2.7e-09	6.48e-07	---
chr1	46298383	46298383	rs10890353	1_46298383_G_T	1_46600917_A_G	1	new	rs1707302	0.97(0.91-1.03)	0.28	0.95(0.93-0.97)	1.8e-05	0.96(0.94-0.98)	5.7e-05	2.7e-09	5.61e-07	---
chr1	46306619	46306619	rs4298677	1_46306619_G_A	1_46600917_A_G	1	new	rs1707302	0.97(0.91-1.03)	0.28	0.95(0.93-0.97)	1.8e-05	0.96(0.94-0.98)	5.7e-05	2.7e-09	7.64e-07	---
chr1	46307268	46307268	rs4606257	1_46307268_G_A	1_46600917_A_G	1	new	rs1707302	0.97(0.91-1.03)	0.28	0.95(0.93-0.97)	1.8e-05	0.96(0.94-0.98)	5.7e-05	2.7e-09	8.84e-07	---
chr1	46310005	46310005	rs10749858	1_46310005_G_C	1_46600917_A_G	1	new	rs1707302	0.97(0.91-1.03)	0.28	0.95(0.93-0.97)	1.8e-05	0.96(0.94-0.98)	5.7e-05	2.7e-09	8.7e-07	---
chr1	46317348	46317348	rs10890355	1_46317348_G_A	1_46600917_A_G	1	new	rs1707302	0.97(0.91-1.03)	0.28	0.95(0.93-0.97)	1.8e-05	0.96(0.94-0.98)	5.7e-05	2.7e-09	6.43e-07	---
chr1	46317864	46317864	rs11211204	1_46317864_A_G	1_46600917_A_G	1	new	rs1707302	0.97(0.91-1.03)	0.28	0.95(0.93-0.97)	1.8e-05	0.96(0.94-0.98)	5.7e-05	2.7e-09	6.42e-07	---
chr1	46318200	46318200	rs35138290	1_46318200_A_AT	1_46600917_A_G	1	new	rs1707302	0.97(0.91-1.03)	0.28	0.95(0.93-0.97)	1.8e-05	0.96(0.94-0.98)	5.7e-05	2.7e-09	1.5e-06	---
chr1	46318991	46318991	rs34163992	1_46318991_CAG_C	1_46600917_A_G	1	new	rs1707302	0.97(0.91-1.03)	0.28	0.95(0.93-0.97)	1.8e-05	0.96(0.94-0.98)	5.7e-05	2.7e-09	2.92e-07	---
chr1	46319025	46319025	rs10890358	1_46319025_T_A	1_46600917_A_G	1	new	rs1707302	0.97(0.91-1.03)	0.28	0.95(0.93-0.97)	1.8e-05	0.96(0.94-0.98)	5.7e-05	2.7e-09	6.46e-07	---
chr1	46319096	46319096	rs6429581	1_46319096_G_A	1_46600917_A_G	1	new	rs1707302	0.97(0.91-1.03)	0.28	0.95(0.93-0.97)	1.8e-05	0.96(0.94-0.98)	5.7e-05	2.7e-09	8.43e-07	---
chr1	46319514	46319514	rs7547189	1_46319514_C_A	1_46600917_A_G	1	new	rs1707302	0.97(0.91-1.03)	0.28	0.95(0.93-0.97)	1.8e-05	0.96(0.94-0.98)	5.7e-05	2.7e-09	6.43e-07	---
chr1	46319565	46319565	rs7547284	1_46319565_C_G	1_46600917_A_G	1	new	rs1707302	0.97(0.91-1.03)	0.28	0.95(0.93-0.97)	1.8e-05	0.96(0.94-0.98)	5.7e-05	2.7e-09	6.43e-07	---
chr1	46321874	46321874	rs11211205	1_46321874_C_T	1_46600917_A_G	1	new	rs1707302	0.97(0.91-1.03)	0.28	0.95(0.93-0.97)	1.8e-05	0.96(0.94-0.98)	5.7e-05	2.7e-09	6.44e-07	---
chr1	46324191	46324191	rs12751443	1_46324191_C_T	1_46600917_A_G	1	new	rs1707302	0.97(0.91-1.03)	0.28	0.95(0.93-0.97)	1.8e-05	0.96(0.94-0.98)	5.7e-05	2.7e-09	1.18e-06	---
chr1	46324314	46324314	rs12136641	1_46324314_G_C	1_46600917_A_G	1	new	rs1707302	0.97(0.91-1.03)	0.28	0.95(0.93-0.97)	1.8e-05	0.96(0.94-0.98)	5.7e-05	2.7e-09	1.14e-06	---
chr1	46325002	46325002	rs12145287	1_46325002_C_G	1_46600917_A_G	1	new	rs1707302	0.97(0.91-1.03)	0.28	0.95(0.93-0.97)	1.8e-05	0.96(0.94-0.98)	5.7e-05	2.7e-09	8.42e-07	---
chr1	46325990	46325990	rs34908920	1_46325990_AG_A	1_46600917_A_G	1	new	rs1707302	0.97(0.91-1.03)	0.28	0.95(0.93-0.97)	1.8e-05	0.96(0.94-0.98)	5.7e-05	2.7e-09	2.39e-07	---
chr1	46326576	46326576	rs6675222	1_46326576_G_T	1_46600917_A_G	1	new	rs1707302	0.97(0.91-1.03)	0.28	0.95(0.93-0.97)	1.8e-05	0.96(0.94-0.98)	5.7e-05	2.7e-09	6.8e-07	---
chr1	46327412	46327412	rs34215190	1_46327412_CAG_C	1_46600917_A_G	1	new	rs1707302	0.97(0.91-1.03)	0.28	0.95(0.93-0.97)	1.8e-05	0.96(0.94-0.98)	5.7e-05	2.7e-09	2.39e-07	---
chr1	46329739	46329739	rs4660895	1_46329739_C_T	1_46600917_A_G	1	new	rs1707302	0.97(0.91-1.03)	0.28	0.95(0.93-0.97)	1.8e-05	0.96(0.94-0.98)	5.7e-05	2.7e-09	6.51e-07	---
chr1	46330423	46330423	rs7531911	1_46330423_A_G	1_46600917_A_G	1	new	rs1707302	0.97(0.91-1.03)	0.28	0.95(0.93-0.97)	1.8e-05	0.96(0.94-0.98)	5.7e-05	2.7e-09	6.52e-07	---
chr1	46332696	46332696	rs34694458	1_46332696_G_A	1_46600917_A_G	1	new	rs1707302	0.97(0.91-1.03)	0.28	0.95(0.93-0.97)	1.8e-05	0.96(0.94-0.98)	5.7e-05	2.7e-09	5.69e-07	---
chr1	46332701	46332701	rs10158032	1_46332701_T_C	1_46600917_A_G	1	new	rs1707302	0.97(0.91-1.03)	0.28	0.95(0.93-0.97)	1.8e-05	0.96(0.94-0.98)	5.7e-05	2.7e-09	5.69e-07	---
chr1	46334876	46334876	rs4660318	1_46334876_A_G	1_46600917_A_G	1	new	rs1707302	0.97(0.91-1.03)	0.28	0.95(0.93-0.97)	1.8e-05	0.96(0.94-0.98)	5.7e-05	2.7e-09	6.8e-07	---
chr1	46335652	46335652	rs11211209	1_46335652_A_G	1_46600917_A_G	1	new	rs1707302	0.97(0.91-1.03)	0.28	0.95(0.93-0.97)	1.8e-05	0.96(0.94-0.98)	5.7e-05	2.7e-09	8.55e-07	---
chr1	46336186	46336186	rs72001420	1_46336186_TTA_T	1_46600917_A_G	1	new	rs1707302	0.97(0.91-1.03)	0.28	0.95(0.93-0.97)	1.8e-05	0.96(0.94-0.98)	5.7e-05	2.7e-09	4.29e-07	---
chr1	46336635	46336635	rs10890359	1_46336635_A_G	1_46600917_A_G	1	new	rs1707302	0.97(0.91-1.03)	0.28	0.95(0.93-0.97)	1.8e-05	0.96(0.94-0.98)	5.7e-05	2.7e-09	6.52e-07	---
chr1	46336892	46336892	rs34995725	1_46336892_C_CT	1_46600917_A_G	1	new	rs1707302	0.97(0.91-1.03)	0.28	0.95(0.93-0.97)	1.8e-05	0.96(0.94-0.98)	5.7e-05	2.7e-09	7.29e-07	---
chr1	46338444	46338444	rs10890360	1_46338444_C_T	1_46600917_A_G	1	new	rs1707302	0.97(0.91-1.03)	0.28	0.95(0.93-0.97)	1.8e-05	0.96(0.94-0.98)	5.7e-05	2.7e-09	6.55e-07	---
chr1	46338861	46338861	rs35141954	1_46338861_A_AT	1_46600917_A_G	1	new	rs1707302	0.97(0.91-1.03)	0.28	0.95(0.93-0.97)	1.8e-05	0.96(0.94-0.98)	5.7e-05	2.7e-09	3.47e-07	---
chr1	46342337	46342337	rs6682683	1_46342337_A_G	1_46600917_A_G	1	new	rs1707302	0.97(0.91-1.03)	0.28	0.95(0.93-0.97)	1.8e-05	0.96(0.94-0.98)	5.7e-05	2.7e-09	6.54e-07	---
chr1	46347813	46347813	rs11211215	1_46347813_A_G	1_46600917_A_G	1	new	rs1707302	0.97(0.91-1.03)	0.28	0.95(0.93-0.97)	1.8e-05	0.96(0.94-0.98)	5.7e-05	2.7e-09	6.54e-07	---
chr1	46348229	46348229	rs11211217	1_46348229_C_G	1_46600917_A_G	1	new	rs1707302	0.97(0.91-1.03)	0.28	0.95(0.93-0.97)	1.8e-05	0.96(0.94-0.98)	5.7e-05	2.7e-09	6.54e-07	---
chr1	46350506	46350506	rs10789478	1_46350506_C_T	1_46600917_A_G	1	new	rs1707302	0.97(0.91-1.03)	0.28	0.95(0.93-0.97)	1.8e-05	0.96(0.94-0.98)	5.7e-05	2.7e-09	8.82e-07	---
chr1	46352500	46352500	rs10789479	1_46352500_T_C	1_46600917_A_G	1	new	rs1707302	0.97(0.91-1.03)	0.28	0.95(0.93-0.97)	1.8e-05	0.96(0.94-0.98)	5.7e-05	2.7e-09	8.58e-07	---
chr1	46352624	46352624	rs7553924	1_46352624_T_C	1_46600917_A_G	1	new	rs1707302	0.97(0.91-1.03)	0.28	0.95(0.93-0.97)	1.8e-05	0.96(0.94-0.98)	5.7e-05	2.7e-09	6.49e-07	---
chr1	46353589	46353589	rs4641257	1_46353589_G_A	1_46600917_A_G	1	new	rs1707302	0.97(0.91-1.03)	0.28	0.95(0.93-0.97)	1.8e-05	0.96(0.94-0.98)	5.7e-05	2.7e-09	6.49e-07	---
chr1	46354595	46354595	rs6693336	1_46354595_C_T	1_46600917_A_G	1	new	rs1707302	0.97(0.91-1.03)	0.28	0.95(0.93-0.97)	1.8e-05	0.96(0.94-0.98)	5.7e-05	2.7e-09	6.49e-07	---
chr1	46355508	46355508	rs11211218	1_46355508_C_G	1_46600917_A_G	1	new	rs1707302	0.97(0.91-1.03)	0.28	0.95(0.93-0.97)	1.8e-05	0.96(0.94-0.98)	5.7e-05	2.7e-09	6.49e-07	---
chr1	46358010	46358010	rs4539075	1_46358010_C_T	1_46600917_A_G	1	new	rs1707302	0.97(0.91-1.03)	0.28	0.95(0.93-0.97)	1.8e-05	0.96(0.94-0.98)	5.7e-05	2.7e-09	6.48e-07	---
chr1	46358862	46358862	rs34444543	1_46358862_G_A	1_46600917_A_G	1	new	rs1707302	0.97(0.91-1.03)	0.28	0.95(0.93-0.97)	1.8e-05	0.96(0.94-0.98)	5.7e-05	2.7e-09	5.41e-07	---
chr1	46359348	46359348	rs10890365	1_46359348_C_T	1_46600917_A_G	1	new	rs1707302	0.97(0.91-1.03)	0.28	0.95(0.93-0.97)	1.8e-05	0.96(0.94-0.98)	5.7e-05	2.7e-09	6.47e-07	---
chr1	46359478	46359478	rs11211219	1_46359478_G_C	1_46600917_A_G	1	new	rs1707302	0.97(0.91-1.03)	0.28	0.95(0.93-0.97)	1.8e-05	0.96(0.94-0.98)	5.7e-05	2.7e-09	6.48e-07	---
chr1	46361177	46361177	rs7512395	1_46361177_G_A	1_46600917_A_G	1	new	rs1707302	0.97(0.91-1.03)	0.28	0.95(0.93-0.97)	1.8e-05	0.96(0.94-0.98)	5.7e-05	2.7e-09	8.8e-07	---
chr1	46367757	46367757	rs11211222	1_46367757_T_C	1_46600917_A_G	1	new	rs1707302	0.97(0.91-1.03)	0.28	0.95(0.93-0.97)	1.8e-05	0.96(0.94-0.98)	5.7e-05	2.7e-09	6.46e-07	---
chr1	46368772	46368772	rs7527244	1_46368772_A_G	1_46600917_A_G	1	new	rs1707302	0.97(0.91-1.03)	0.28	0.95(0.93-0.97)	1.8e-05	0.96(0.94-0.98)	5.7e-05	2.7e-09	6.46e-07	---
chr1	46370263	46370263	rs4524994	1_46370263_A_G	1_46600917_A_G	1	new	rs1707302	0.97(0.91-1.03)	0.28	0.95(0.93-0.97)	1.8e-05	0.96(0.94-0.98)	5.7e-05	2.7e-09	7.28e-07	---
chr1	46371050	46371050	rs28636523	1_46371050_G_A	1_46600917_A_G	1	new	rs1707302	0.97(0.91-1.03)	0.28	0.95(0.93-0.97)	1.8e-05	0.96(0.94-0.98)	5.7e-05	2.7e-09	8.66e-07	---
chr1	46371596	46371596	rs9787412	1_46371596_C_T	1_46600917_A_G	1	new	rs1707302	0.97(0.91-1.03)	0.28	0.95(0.93-0.97)	1.8e-05	0.96(0.94-0.98)	5.7e-05	2.7e-09	6.95e-07	---
chr1	46372416	46372416	rs4660896	1_46372416_A_G	1_46600917_A_G	1	new	rs1707302	0.97(0.91-1.03)	0.28	0.95(0.93-0.97)	1.8e-05	0.96(0.94-0.98)	5.7e-05	2.7e-09	6.95e-07	---
chr1	46372688	46372688	rs10732844	1_46372688_T_C	1_46600917_A_G	1	new	rs1707302	0.97(0.91-1.03)	0.28	0.95(0.93-0.97)	1.8e-05	0.96(0.94-0.98)	5.7e-05	2.7e-09	6.94e-07	---
chr1	46373348	46373348	rs12133129	1_46373348_C_T	1_46600917_A_G	1	new	rs1707302	0.97(0.91-1.03)	0.28	0.95(0.93-0.97)	1.8e-05	0.96(0.94-0.98)	5.7e-05	2.7e-09	6.95e-07	---
chr1	46375253	46375253	rs4553121	1_46375253_G_A	1_46600917_A_G	1	new	rs1707302	0.97(0.91-1.03)	0.28	0.95(0.93-0.97)	1.8e-05	0.96(0.94-0.98)	5.7e-05	2.7e-09	6.94e-07	---
chr1	46375799	46375799	rs10789480	1_46375799_C_T	1_46600917_A_G	1	new	rs1707302	0.97(0.91-1.03)	0.28	0.95(0.93-0.97)	1.8e-05	0.96(0.94-0.98)	5.7e-05	2.7e-09	2.16e-07	---
chr1	46376692	46376692	rs6690652	1_46376692_G_T	1_46600917_A_G	1	new	rs1707302	0.97(0.91-1.03)	0.28	0.95(0.93-0.97)	1.8e-05	0.96(0.94-0.98)	5.7e-05	2.7e-09	6.94e-07	---
chr1	46380207	46380207	rs6695421	1_46380207_T_C	1_46600917_A_G	1	new	rs1707302	0.97(0.91-1.03)	0.28	0.95(0.93-0.97)	1.8e-05	0.96(0.94-0.98)	5.7e-05	2.7e-09	6.82e-07	---
chr1	46380605	46380605	rs11211223	1_46380605_C_T	1_46600917_A_G	1	new	rs1707302	0.97(0.91-1.03)	0.28	0.95(0.93-0.97)	1.8e-05	0.96(0.94-0.98)	5.7e-05	2.7e-09	6.73e-07	---
chr1	46380850	46380850	rs12124847	1_46380850_T_A	1_46600917_A_G	1	new	rs1707302	0.97(0.91-1.03)	0.28	0.95(0.93-0.97)	1.8e-05	0.96(0.94-0.98)	5.7e-05	2.7e-09	9.27e-07	---
chr1	46381232	46381232	rs10890368	1_46381232_A_G	1_46600917_A_G	1	new	rs1707302	0.97(0.91-1.03)	0.28	0.95(0.93-0.97)	1.8e-05	0.96(0.94-0.98)	5.7e-05	2.7e-09	6.64e-07	---
chr1	46382852	46382852	rs6687301	1_46382852_T_C	1_46600917_A_G	1	new	rs1707302	0.97(0.91-1.03)	0.28	0.95(0.93-0.97)	1.8e-05	0.96(0.94-0.98)	5.7e-05	2.7e-09	6.52e-07	---
chr1	46384141	46384141	rs12077974	1_46384141_G_A	1_46600917_A_G	1	new	rs1707302	0.97(0.91-1.03)	0.28	0.95(0.93-0.97)	1.8e-05	0.96(0.94-0.98)	5.7e-05	2.7e-09	1.53e-07	---
chr1	46386269	46386269	rs6657720	1_46386269_G_A	1_46600917_A_G	1	new	rs1707302	0.97(0.91-1.03)	0.28	0.95(0.93-0.97)	1.8e-05	0.96(0.94-0.98)	5.7e-05	2.7e-09	6.12e-07	---
chr1	46387829	46387829	rs7519181	1_46387829_G_C	1_46600917_A_G	1	new	rs1707302	0.97(0.91-1.03)	0.28	0.95(0.93-0.97)	1.8e-05	0.96(0.94-0.98)	5.7e-05	2.7e-09	6.1e-07	---
chr1	46389217	46389217	rs10890370	1_46389217_C_T	1_46600917_A_G	1	new	rs1707302	0.97(0.91-1.03)	0.28	0.95(0.93-0.97)	1.8e-05	0.96(0.94-0.98)	5.7e-05	2.7e-09	5.95e-07	---
chr1	46390560	46390560	rs7526369	1_46390560_G_C	1_46600917_A_G	1	new	rs1707302	0.97(0.91-1.03)	0.28	0.95(0.93-0.97)	1.8e-05	0.96(0.94-0.98)	5.7e-05	2.7e-09	5.95e-07	---
chr1	46390897	46390897	rs10890371	1_46390897_T_G	1_46600917_A_G	1	new	rs1707302	0.97(0.91-1.03)	0.28	0.95(0.93-0.97)	1.8e-05	0.96(0.94-0.98)	5.7e-05	2.7e-09	5.94e-07	---
chr1	46391020	46391020	rs10890372	1_46391020_T_G	1_46600917_A_G	1	new	rs1707302	0.97(0.91-1.03)	0.28	0.95(0.93-0.97)	1.8e-05	0.96(0.94-0.98)	5.7e-05	2.7e-09	6.09e-07	---
chr1	46392364	46392364	rs4074225	1_46392364_G_C	1_46600917_A_G	1	new	rs1707302	0.97(0.91-1.03)	0.28	0.95(0.93-0.97)	1.8e-05	0.96(0.94-0.98)	5.7e-05	2.7e-09	8.34e-07	---
chr1	46393217	46393217	rs4297233	1_46393217_G_C	1_46600917_A_G	1	new	rs1707302	0.97(0.91-1.03)	0.28	0.95(0.93-0.97)	1.8e-05	0.96(0.94-0.98)	5.7e-05	2.7e-09	6.08e-07	---
chr1	46393755	46393755	rs10890373	1_46393755_A_C	1_46600917_A_G	1	new	rs1707302	0.97(0.91-1.03)	0.28	0.95(0.93-0.97)	1.8e-05	0.96(0.94-0.98)	5.7e-05	2.7e-09	8.37e-07	---
chr1	46395158	46395158	rs4134387	1_46395158_A_T	1_46600917_A_G	1	new	rs1707302	0.97(0.91-1.03)	0.28	0.95(0.93-0.97)	1.8e-05	0.96(0.94-0.98)	5.7e-05	2.7e-09	8.13e-07	---
chr1	46398382	46398382	rs6681068	1_46398382_G_A	1_46600917_A_G	1	new	rs1707302	0.97(0.91-1.03)	0.28	0.95(0.93-0.97)	1.8e-05	0.96(0.94-0.98)	5.7e-05	2.7e-09	6.06e-07	---
chr1	46399840	46399840	rs11211228	1_46399840_G_A	1_46600917_A_G	1	new	rs1707302	0.97(0.91-1.03)	0.28	0.95(0.93-0.97)	1.8e-05	0.96(0.94-0.98)	5.7e-05	2.7e-09	6.02e-07	---
chr1	46400517	46400517	rs11211229	1_46400517_A_C	1_46600917_A_G	1	new	rs1707302	0.97(0.91-1.03)	0.28	0.95(0.93-0.97)	1.8e-05	0.96(0.94-0.98)	5.7e-05	2.7e-09	6.43e-07	---
chr1	46401907	46401907	rs9803784	1_46401907_T_C	1_46600917_A_G	1	new	rs1707302	0.97(0.91-1.03)	0.28	0.95(0.93-0.97)	1.8e-05	0.96(0.94-0.98)	5.7e-05	2.7e-09	5.98e-07	---
chr1	46402732	46402732	rs12022335	1_46402732_C_A	1_46600917_A_G	1	new	rs1707302	0.97(0.91-1.03)	0.28	0.95(0.93-0.97)	1.8e-05	0.96(0.94-0.98)	5.7e-05	2.7e-09	5.97e-07	---
chr1	46403457	46403457	rs10127690	1_46403457_A_G	1_46600917_A_G	1	new	rs1707302	0.97(0.91-1.03)	0.28	0.95(0.93-0.97)	1.8e-05	0.96(0.94-0.98)	5.7e-05	2.7e-09	5.96e-07	---
chr1	46405214	46405214	rs34907901	1_46405214_T_G	1_46600917_A_G	1	new	rs1707302	0.97(0.91-1.03)	0.28	0.95(0.93-0.97)	1.8e-05	0.96(0.94-0.98)	5.7e-05	2.7e-09	1.93e-06	---
chr1	46405466	46405466	rs28831083	1_46405466_C_T	1_46600917_A_G	1	new	rs1707302	0.97(0.91-1.03)	0.28	0.95(0.93-0.97)	1.8e-05	0.96(0.94-0.98)	5.7e-05	2.7e-09	5.91e-07	---
chr1	46406417	46406417	rs10890374	1_46406417_C_G	1_46600917_A_G	1	new	rs1707302	0.97(0.91-1.03)	0.28	0.95(0.93-0.97)	1.8e-05	0.96(0.94-0.98)	5.7e-05	2.7e-09	5.9e-07	---
chr1	46406581	46406581	rs10890375	1_46406581_G_A	1_46600917_A_G	1	new	rs1707302	0.97(0.91-1.03)	0.28	0.95(0.93-0.97)	1.8e-05	0.96(0.94-0.98)	5.7e-05	2.7e-09	5.22e-07	---
chr1	46406582	46406582	rs10890376	1_46406582_C_T	1_46600917_A_G	1	new	rs1707302	0.97(0.91-1.03)	0.28	0.95(0.93-0.97)	1.8e-05	0.96(0.94-0.98)	5.7e-05	2.7e-09	7.2e-07	---
chr1	46406594	46406594	rs10890377	1_46406594_G_A	1_46600917_A_G	1	new	rs1707302	0.97(0.91-1.03)	0.28	0.95(0.93-0.97)	1.8e-05	0.96(0.94-0.98)	5.7e-05	2.7e-09	5.22e-07	---
chr1	46406978	46406978	rs10789484	1_46406978_G_C	1_46600917_A_G	1	new	rs1707302	0.97(0.91-1.03)	0.28	0.95(0.93-0.97)	1.8e-05	0.96(0.94-0.98)	5.7e-05	2.7e-09	5.85e-07	---
chr1	46407308	46407308	rs10789485	1_46407308_C_T	1_46600917_A_G	1	new	rs1707302	0.97(0.91-1.03)	0.28	0.95(0.93-0.97)	1.8e-05	0.96(0.94-0.98)	5.7e-05	2.7e-09	7.93e-07	---
chr1	46408667	46408667	rs10789486	1_46408667_A_G	1_46600917_A_G	1	new	rs1707302	0.97(0.91-1.03)	0.28	0.95(0.93-0.97)	1.8e-05	0.96(0.94-0.98)	5.7e-05	2.7e-09	5.77e-07	---
chr1	46410657	46410657	rs10890378	1_46410657_G_A	1_46600917_A_G	1	new	rs1707302	0.97(0.91-1.03)	0.28	0.95(0.93-0.97)	1.8e-05	0.96(0.94-0.98)	5.7e-05	2.7e-09	5.34e-07	---
chr1	46411146	46411146	rs11211232	1_46411146_G_A	1_46600917_A_G	1	new	rs1707302	0.97(0.91-1.03)	0.28	0.95(0.93-0.97)	1.8e-05	0.96(0.94-0.98)	5.7e-05	2.7e-09	7.43e-07	---
chr1	46413450	46413450	rs7527079	1_46413450_C_G	1_46600917_A_G	1	new	rs1707302	0.97(0.91-1.03)	0.28	0.95(0.93-0.97)	1.8e-05	0.96(0.94-0.98)	5.7e-05	2.7e-09	5.54e-07	---
chr1	46413698	46413698	rs7527298	1_46413698_C_T	1_46600917_A_G	1	new	rs1707302	0.97(0.91-1.03)	0.28	0.95(0.93-0.97)	1.8e-05	0.96(0.94-0.98)	5.7e-05	2.7e-09	5.54e-07	---
chr1	46414107	46414107	rs61785584	1_46414107_C_T	1_46600917_A_G	1	new	rs1707302	0.97(0.91-1.03)	0.28	0.95(0.93-0.97)	1.8e-05	0.96(0.94-0.98)	5.7e-05	2.7e-09	7.21e-07	---
chr1	46417655	46417655	rs34446427	1_46417655_A_C	1_46600917_A_G	1	new	rs1707302	0.97(0.91-1.03)	0.28	0.95(0.93-0.97)	1.8e-05	0.96(0.94-0.98)	5.7e-05	2.7e-09	5.33e-07	---
chr1	46419605	46419605	rs4660900	1_46419605_T_C	1_46600917_A_G	1	new	rs1707302	0.97(0.91-1.03)	0.28	0.95(0.93-0.97)	1.8e-05	0.96(0.94-0.98)	5.7e-05	2.7e-09	5.3e-07	---
chr1	46423555	46423555	rs4454479	1_46423555_G_A	1_46600917_A_G	1	new	rs1707302	0.97(0.91-1.03)	0.28	0.95(0.93-0.97)	1.8e-05	0.96(0.94-0.98)	5.7e-05	2.7e-09	5.29e-07	---
chr1	46425943	46425943	rs7517560	1_46425943_A_G	1_46600917_A_G	1	new	rs1707302	0.97(0.91-1.03)	0.28	0.95(0.93-0.97)	1.8e-05	0.96(0.94-0.98)	5.7e-05	2.7e-09	6.7e-07	---
chr1	46427838	46427838	rs143955886	1_46427838_A_G	1_46600917_A_G	1	new	rs1707302	0.97(0.91-1.03)	0.28	0.95(0.93-0.97)	1.8e-05	0.96(0.94-0.98)	5.7e-05	2.7e-09	5.34e-07	---
chr1	46429427	46429427	rs7516008	1_46429427_C_A	1_46600917_A_G	1	new	rs1707302	0.97(0.91-1.03)	0.28	0.95(0.93-0.97)	1.8e-05	0.96(0.94-0.98)	5.7e-05	2.7e-09	5.29e-07	---
chr1	46429431	46429431	rs7530103	1_46429431_T_C	1_46600917_A_G	1	new	rs1707302	0.97(0.91-1.03)	0.28	0.95(0.93-0.97)	1.8e-05	0.96(0.94-0.98)	5.7e-05	2.7e-09	5.34e-07	---
chr1	46429510	46429510	rs75840714	1_46429510_T_G	1_46600917_A_G	1	new	rs1707302	0.97(0.91-1.03)	0.28	0.95(0.93-0.97)	1.8e-05	0.96(0.94-0.98)	5.7e-05	2.7e-09	6.76e-07	---
chr1	46431621	46431621	rs12403666	1_46431621_G_A	1_46600917_A_G	1	new	rs1707302	0.97(0.91-1.03)	0.28	0.95(0.93-0.97)	1.8e-05	0.96(0.94-0.98)	5.7e-05	2.7e-09	5.23e-07	---
chr1	46431806	46431806	rs12077546	1_46431806_C_T	1_46600917_A_G	1	new	rs1707302	0.97(0.91-1.03)	0.28	0.95(0.93-0.97)	1.8e-05	0.96(0.94-0.98)	5.7e-05	2.7e-09	5.29e-07	---
chr1	46432132	46432132	rs12124291	1_46432132_G_A	1_46600917_A_G	1	new	rs1707302	0.97(0.91-1.03)	0.28	0.95(0.93-0.97)	1.8e-05	0.96(0.94-0.98)	5.7e-05	2.7e-09	5.21e-07	---
chr1	46433990	46433990	rs6671754	1_46433990_A_G	1_46600917_A_G	1	new	rs1707302	0.97(0.91-1.03)	0.28	0.95(0.93-0.97)	1.8e-05	0.96(0.94-0.98)	5.7e-05	2.7e-09	5.25e-07	---
chr1	46434428	46434428	rs12067716	1_46434428_T_A	1_46600917_A_G	1	new	rs1707302	0.97(0.91-1.03)	0.28	0.95(0.93-0.97)	1.8e-05	0.96(0.94-0.98)	5.7e-05	2.7e-09	5.95e-07	---
chr1	46436451	46436451	rs6666763	1_46436451_C_A	1_46600917_A_G	1	new	rs1707302	0.97(0.91-1.03)	0.28	0.95(0.93-0.97)	1.8e-05	0.96(0.94-0.98)	5.7e-05	2.7e-09	5.1e-07	---
chr1	46438698	46438698	rs4489497	1_46438698_C_T	1_46600917_A_G	1	new	rs1707302	0.97(0.91-1.03)	0.28	0.95(0.93-0.97)	1.8e-05	0.96(0.94-0.98)	5.7e-05	2.7e-09	5.1e-07	---
chr1	46438922	46438922	rs35482380	1_46438922_AC_A	1_46600917_A_G	1	new	rs1707302	0.97(0.91-1.03)	0.28	0.95(0.93-0.97)	1.8e-05	0.96(0.94-0.98)	5.7e-05	2.7e-09	1.9e-07	---
chr1	46440375	46440375	rs11211235	1_46440375_G_A	1_46600917_A_G	1	new	rs1707302	0.97(0.91-1.03)	0.28	0.95(0.93-0.97)	1.8e-05	0.96(0.94-0.98)	5.7e-05	2.7e-09	5.11e-07	---
chr1	46441360	46441360	rs9919275	1_46441360_A_C	1_46600917_A_G	1	new	rs1707302	0.97(0.91-1.03)	0.28	0.95(0.93-0.97)	1.8e-05	0.96(0.94-0.98)	5.7e-05	2.7e-09	4.79e-07	---
chr1	46443767	46443767	rs11211236	1_46443767_C_A	1_46600917_A_G	1	new	rs1707302	0.97(0.91-1.03)	0.28	0.95(0.93-0.97)	1.8e-05	0.96(0.94-0.98)	5.7e-05	2.7e-09	4.94e-07	---
chr1	46444831	46444831	rs4660328	1_46444831_G_T	1_46600917_A_G	1	new	rs1707302	0.97(0.91-1.03)	0.28	0.95(0.93-0.97)	1.8e-05	0.96(0.94-0.98)	5.7e-05	2.7e-09	4.95e-07	---
chr1	46445871	46445871	rs61785613	1_46445871_C_T	1_46600917_A_G	1	new	rs1707302	0.97(0.91-1.03)	0.28	0.95(0.93-0.97)	1.8e-05	0.96(0.94-0.98)	5.7e-05	2.7e-09	4.95e-07	---
chr1	46446047	46446047	rs61785614	1_46446047_A_G	1_46600917_A_G	1	new	rs1707302	0.97(0.91-1.03)	0.28	0.95(0.93-0.97)	1.8e-05	0.96(0.94-0.98)	5.7e-05	2.7e-09	4.97e-07	---
chr1	46446800	46446800	rs9793167	1_46446800_G_A	1_46600917_A_G	1	new	rs1707302	0.97(0.91-1.03)	0.28	0.95(0.93-0.97)	1.8e-05	0.96(0.94-0.98)	5.7e-05	2.7e-09	4.95e-07	---
chr1	46447329	46447329	rs11211237	1_46447329_G_C	1_46600917_A_G	1	new	rs1707302	0.97(0.91-1.03)	0.28	0.95(0.93-0.97)	1.8e-05	0.96(0.94-0.98)	5.7e-05	2.7e-09	4.95e-07	---
chr1	46449415	46449415	rs11211238	1_46449415_G_A	1_46600917_A_G	1	new	rs1707302	0.97(0.91-1.03)	0.28	0.95(0.93-0.97)	1.8e-05	0.96(0.94-0.98)	5.7e-05	2.7e-09	4.95e-07	---
chr1	46449469	46449469	rs10890380	1_46449469_A_G	1_46600917_A_G	1	new	rs1707302	0.97(0.91-1.03)	0.28	0.95(0.93-0.97)	1.8e-05	0.96(0.94-0.98)	5.7e-05	2.7e-09	5.22e-07	---
chr1	46449918	46449918	rs4460583	1_46449918_C_G	1_46600917_A_G	1	new	rs1707302	0.97(0.91-1.03)	0.28	0.95(0.93-0.97)	1.8e-05	0.96(0.94-0.98)	5.7e-05	2.7e-09	4.95e-07	---
chr1	46451203	46451203	rs4459051	1_46451203_A_G	1_46600917_A_G	1	new	rs1707302	0.97(0.91-1.03)	0.28	0.95(0.93-0.97)	1.8e-05	0.96(0.94-0.98)	5.7e-05	2.7e-09	4.94e-07	---
chr1	46451771	46451771	rs10890381	1_46451771_T_G	1_46600917_A_G	1	new	rs1707302	0.97(0.91-1.03)	0.28	0.95(0.93-0.97)	1.8e-05	0.96(0.94-0.98)	5.7e-05	2.7e-09	6.68e-07	---
chr1	46451947	46451947	rs11211239	1_46451947_A_G	1_46600917_A_G	1	new	rs1707302	0.97(0.91-1.03)	0.28	0.95(0.93-0.97)	1.8e-05	0.96(0.94-0.98)	5.7e-05	2.7e-09	4.95e-07	---
chr1	46454058	46454058	rs6429588	1_46454058_T_G	1_46600917_A_G	1	new	rs1707302	0.97(0.91-1.03)	0.28	0.95(0.93-0.97)	1.8e-05	0.96(0.94-0.98)	5.7e-05	2.7e-09	5.17e-07	---
chr1	46454535	46454535	rs34619960	1_46454535_C_CT	1_46600917_A_G	1	new	rs1707302	0.97(0.91-1.03)	0.28	0.95(0.93-0.97)	1.8e-05	0.96(0.94-0.98)	5.7e-05	2.7e-09	2.27e-07	---
chr1	46455433	46455433	rs11211243	1_46455433_G_C	1_46600917_A_G	1	new	rs1707302	0.97(0.91-1.03)	0.28	0.95(0.93-0.97)	1.8e-05	0.96(0.94-0.98)	5.7e-05	2.7e-09	4.93e-07	---
chr1	46456673	46456673	rs11211244	1_46456673_G_A	1_46600917_A_G	1	new	rs1707302	0.97(0.91-1.03)	0.28	0.95(0.93-0.97)	1.8e-05	0.96(0.94-0.98)	5.7e-05	2.7e-09	4.94e-07	---
chr1	46457601	46457601	rs4660903	1_46457601_A_G	1_46600917_A_G	1	new	rs1707302	0.97(0.91-1.03)	0.28	0.95(0.93-0.97)	1.8e-05	0.96(0.94-0.98)	5.7e-05	2.7e-09	4.94e-07	---
chr1	46458783	46458783	rs4660331	1_46458783_A_C	1_46600917_A_G	1	new	rs1707302	0.97(0.91-1.03)	0.28	0.95(0.93-0.97)	1.8e-05	0.96(0.94-0.98)	5.7e-05	2.7e-09	1.44e-06	---
chr1	46459886	46459886	rs12097799	1_46459886_C_A	1_46600917_A_G	1	new	rs1707302	0.97(0.91-1.03)	0.28	0.95(0.93-0.97)	1.8e-05	0.96(0.94-0.98)	5.7e-05	2.7e-09	4.98e-07	---
chr1	46460667	46460667	rs4660904	1_46460667_C_T	1_46600917_A_G	1	new	rs1707302	0.97(0.91-1.03)	0.28	0.95(0.93-0.97)	1.8e-05	0.96(0.94-0.98)	5.7e-05	2.7e-09	4.88e-07	---
chr1	46460766	46460766	rs7534331	1_46460766_C_T	1_46600917_A_G	1	new	rs1707302	0.97(0.91-1.03)	0.28	0.95(0.93-0.97)	1.8e-05	0.96(0.94-0.98)	5.7e-05	2.7e-09	5.5e-07	---
chr1	46461418	46461418	rs4660332	1_46461418_T_A	1_46600917_A_G	1	new	rs1707302	0.97(0.91-1.03)	0.28	0.95(0.93-0.97)	1.8e-05	0.96(0.94-0.98)	5.7e-05	2.7e-09	6.87e-07	---
chr1	46461587	46461587	rs4660905	1_46461587_A_G	1_46600917_A_G	1	new	rs1707302	0.97(0.91-1.03)	0.28	0.95(0.93-0.97)	1.8e-05	0.96(0.94-0.98)	5.7e-05	2.7e-09	4.59e-07	---
chr1	46462126	46462126	rs4660334	1_46462126_T_G	1_46600917_A_G	1	new	rs1707302	0.97(0.91-1.03)	0.28	0.95(0.93-0.97)	1.8e-05	0.96(0.94-0.98)	5.7e-05	2.7e-09	4.96e-07	---
chr1	46463012	46463012	rs4073847	1_46463012_G_T	1_46600917_A_G	1	new	rs1707302	0.97(0.91-1.03)	0.28	0.95(0.93-0.97)	1.8e-05	0.96(0.94-0.98)	5.7e-05	2.7e-09	4.95e-07	---
chr1	46465662	46465662	rs6661500	1_46465662_T_C	1_46600917_A_G	1	new	rs1707302	0.97(0.91-1.03)	0.28	0.95(0.93-0.97)	1.8e-05	0.96(0.94-0.98)	5.7e-05	2.7e-09	5.08e-07	---
chr1	46469674	46469674	rs10890382	1_46469674_A_G	1_46600917_A_G	1	new	rs1707302	0.97(0.91-1.03)	0.28	0.95(0.93-0.97)	1.8e-05	0.96(0.94-0.98)	5.7e-05	2.7e-09	7.03e-07	---
chr1	46470860	46470860	rs4660906	1_46470860_C_T	1_46600917_A_G	1	new	rs1707302	0.97(0.91-1.03)	0.28	0.95(0.93-0.97)	1.8e-05	0.96(0.94-0.98)	5.7e-05	2.7e-09	5.37e-07	---
chr1	46473802	46473802	rs3922887	1_46473802_A_G	1_46600917_A_G	1	new	rs1707302	0.97(0.91-1.03)	0.28	0.95(0.93-0.97)	1.8e-05	0.96(0.94-0.98)	5.7e-05	2.7e-09	5.18e-07	---
chr1	46473902	46473902	rs3922886	1_46473902_A_T	1_46600917_A_G	1	new	rs1707302	0.97(0.91-1.03)	0.28	0.95(0.93-0.97)	1.8e-05	0.96(0.94-0.98)	5.7e-05	2.7e-09	5.18e-07	---
chr1	46474718	46474718	rs4660335	1_46474718_C_T	1_46600917_A_G	1	new	rs1707302	0.97(0.91-1.03)	0.28	0.95(0.93-0.97)	1.8e-05	0.96(0.94-0.98)	5.7e-05	2.7e-09	7e-07	---
chr1	46475836	46475836	rs6677777	1_46475836_A_G	1_46600917_A_G	1	new	rs1707302	0.97(0.91-1.03)	0.28	0.95(0.93-0.97)	1.8e-05	0.96(0.94-0.98)	5.7e-05	2.7e-09	8.22e-07	---
chr1	46476746	46476746	rs35155395	1_46476746_TG_T	1_46600917_A_G	1	new	rs1707302	0.97(0.91-1.03)	0.28	0.95(0.93-0.97)	1.8e-05	0.96(0.94-0.98)	5.7e-05	2.7e-09	1.86e-07	---
chr1	46476844	46476844	rs11211248	1_46476844_A_G	1_46600917_A_G	1	new	rs1707302	0.97(0.91-1.03)	0.28	0.95(0.93-0.97)	1.8e-05	0.96(0.94-0.98)	5.7e-05	2.7e-09	5.08e-07	---
chr1	46481799	46481799	rs201377643	1_46481799_C_G	1_46600917_A_G	1	new	rs1707302	0.97(0.91-1.03)	0.28	0.95(0.93-0.97)	1.8e-05	0.96(0.94-0.98)	5.7e-05	2.7e-09	6.15e-07	+++
chr1	46481939	46481939	rs74507939	1_46481939_C_G	1_46600917_A_G	1	new	rs1707302	0.97(0.91-1.03)	0.28	0.95(0.93-0.97)	1.8e-05	0.96(0.94-0.98)	5.7e-05	2.7e-09	5.27e-07	+++
chr1	46482691	46482691	rs9429175	1_46482691_T_C	1_46600917_A_G	1	new	rs1707302	0.97(0.91-1.03)	0.28	0.95(0.93-0.97)	1.8e-05	0.96(0.94-0.98)	5.7e-05	2.7e-09	5.28e-07	+++
chr1	46482835	46482835	rs9429176	1_46482835_T_C	1_46600917_A_G	1	new	rs1707302	0.97(0.91-1.03)	0.28	0.95(0.93-0.97)	1.8e-05	0.96(0.94-0.98)	5.7e-05	2.7e-09	5.23e-07	+++
chr1	46485075	46485075	rs7532204	1_46485075_C_G	1_46600917_A_G	1	new	rs1707302	0.97(0.91-1.03)	0.28	0.95(0.93-0.97)	1.8e-05	0.96(0.94-0.98)	5.7e-05	2.7e-09	5.14e-07	+++
chr1	46485562	46485562	rs946528	1_46485562_C_T	1_46600917_A_G	1	new	rs1707302	0.97(0.91-1.03)	0.28	0.95(0.93-0.97)	1.8e-05	0.96(0.94-0.98)	5.7e-05	2.7e-09	1.17e-06	+++
chr1	46485970	46485970	rs946527	1_46485970_T_C	1_46600917_A_G	1	new	rs1707302	0.97(0.91-1.03)	0.28	0.95(0.93-0.97)	1.8e-05	0.96(0.94-0.98)	5.7e-05	2.7e-09	1.51e-06	+++
chr1	46487277	46487277	rs946525	1_46487277_A_T	1_46600917_A_G	1	new	rs1707302	0.97(0.91-1.03)	0.28	0.95(0.93-0.97)	1.8e-05	0.96(0.94-0.98)	5.7e-05	2.7e-09	5.16e-07	+++
chr1	46487560	46487560	rs946524	1_46487560_A_G	1_46600917_A_G	1	new	rs1707302	0.97(0.91-1.03)	0.28	0.95(0.93-0.97)	1.8e-05	0.96(0.94-0.98)	5.7e-05	2.7e-09	5.15e-07	+++
chr1	46487976	46487976	rs4660336	1_46487976_T_C	1_46600917_A_G	1	new	rs1707302	0.97(0.91-1.03)	0.28	0.95(0.93-0.97)	1.8e-05	0.96(0.94-0.98)	5.7e-05	2.7e-09	5.32e-07	+++
chr1	46490654	46490654	rs785477	1_46490654_A_G	1_46600917_A_G	1	new	rs1707302	0.97(0.91-1.03)	0.28	0.95(0.93-0.97)	1.8e-05	0.96(0.94-0.98)	5.7e-05	2.7e-09	3.94e-07	+++
chr1	46491635	46491635	rs785478	1_46491635_C_T	1_46600917_A_G	1	new	rs1707302	0.97(0.91-1.03)	0.28	0.95(0.93-0.97)	1.8e-05	0.96(0.94-0.98)	5.7e-05	2.7e-09	4.89e-07	+++
chr1	46492164	46492164	rs785480	1_46492164_C_G	1_46600917_A_G	1	new	rs1707302	0.97(0.91-1.03)	0.28	0.95(0.93-0.97)	1.8e-05	0.96(0.94-0.98)	5.7e-05	2.7e-09	4.51e-07	+++
chr1	46498375	46498375	rs1622208	1_46498375_A_G	1_46600917_A_G	1	new	rs1707302	0.97(0.91-1.03)	0.28	0.95(0.93-0.97)	1.8e-05	0.96(0.94-0.98)	5.7e-05	2.7e-09	6.9e-07	+++
chr1	46498648	46498648	rs371512102	1_46498648_CAAAA_C	1_46600917_A_G	1	new	rs1707302	0.97(0.91-1.03)	0.28	0.95(0.93-0.97)	1.8e-05	0.96(0.94-0.98)	5.7e-05	2.7e-09	1.99e-07	+++
chr1	46498831	46498831	rs2669156	1_46498831_G_A	1_46600917_A_G	1	new	rs1707302	0.97(0.91-1.03)	0.28	0.95(0.93-0.97)	1.8e-05	0.96(0.94-0.98)	5.7e-05	2.7e-09	5.28e-07	+++
chr1	46502295	46502295	rs6675259	1_46502295_G_A	1_46600917_A_G	1	new	rs1707302	0.97(0.91-1.03)	0.28	0.95(0.93-0.97)	1.8e-05	0.96(0.94-0.98)	5.7e-05	2.7e-09	7.3e-07	+++
chr1	46505054	46505054	rs7538978	1_46505054_G_A	1_46600917_A_G	1	new	rs1707302	0.97(0.91-1.03)	0.28	0.95(0.93-0.97)	1.8e-05	0.96(0.94-0.98)	5.7e-05	2.7e-09	4.99e-07	+++
chr1	46505147	46505147	rs1707322	1_46505147_A_G	1_46600917_A_G	1	new	rs1707302	0.97(0.91-1.03)	0.28	0.95(0.93-0.97)	1.8e-05	0.96(0.94-0.98)	5.7e-05	2.7e-09	4.85e-07	+++
chr1	46505589	46505589	rs11444102	1_46505589_T_TC	1_46600917_A_G	1	new	rs1707302	0.97(0.91-1.03)	0.28	0.95(0.93-0.97)	1.8e-05	0.96(0.94-0.98)	5.7e-05	2.7e-09	1.44e-07	+++
chr1	46505785	46505785	rs71062735	1_46505785_A_AC	1_46600917_A_G	1	new	rs1707302	0.97(0.91-1.03)	0.28	0.95(0.93-0.97)	1.8e-05	0.96(0.94-0.98)	5.7e-05	2.7e-09	1.4e-07	+++
chr1	46508769	46508769	rs1707337	1_46508769_A_G	1_46600917_A_G	1	new	rs1707302	0.97(0.91-1.03)	0.28	0.95(0.93-0.97)	1.8e-05	0.96(0.94-0.98)	5.7e-05	2.7e-09	5.6e-07	+++
chr1	46510570	46510570	rs1768807	1_46510570_A_G	1_46600917_A_G	1	new	rs1707302	0.97(0.91-1.03)	0.28	0.95(0.93-0.97)	1.8e-05	0.96(0.94-0.98)	5.7e-05	2.7e-09	5.53e-07	+++
chr1	46510642	46510642	rs1707317	1_46510642_C_T	1_46600917_A_G	1	new	rs1707302	0.97(0.91-1.03)	0.28	0.95(0.93-0.97)	1.8e-05	0.96(0.94-0.98)	5.7e-05	2.7e-09	6.88e-07	+++
chr1	46511487	46511487	rs2297883	1_46511487_G_C	1_46600917_A_G	1	new	rs1707302	0.97(0.91-1.03)	0.28	0.95(0.93-0.97)	1.8e-05	0.96(0.94-0.98)	5.7e-05	2.7e-09	5.54e-07	+++
chr1	46511981	46511981	rs1707338	1_46511981_T_G	1_46600917_A_G	1	new	rs1707302	0.97(0.91-1.03)	0.28	0.95(0.93-0.97)	1.8e-05	0.96(0.94-0.98)	5.7e-05	2.7e-09	5.48e-07	+++
chr1	46513179	46513179	rs1707339	1_46513179_A_G	1_46600917_A_G	1	new	rs1707302	0.97(0.91-1.03)	0.28	0.95(0.93-0.97)	1.8e-05	0.96(0.94-0.98)	5.7e-05	2.7e-09	5.46e-07	+++
chr1	46514286	46514286	rs1768818	1_46514286_G_C	1_46600917_A_G	1	new	rs1707302	0.97(0.91-1.03)	0.28	0.95(0.93-0.97)	1.8e-05	0.96(0.94-0.98)	5.7e-05	2.7e-09	5.57e-07	+++
chr1	46514534	46514534	rs1768817	1_46514534_C_G	1_46600917_A_G	1	new	rs1707302	0.97(0.91-1.03)	0.28	0.95(0.93-0.97)	1.8e-05	0.96(0.94-0.98)	5.7e-05	2.7e-09	5.56e-07	+++
chr1	46519622	46519622	rs785470	1_46519622_C_A	1_46600917_A_G	1	new	rs1707302	0.97(0.91-1.03)	0.28	0.95(0.93-0.97)	1.8e-05	0.96(0.94-0.98)	5.7e-05	2.7e-09	5.59e-07	+++
chr1	46520826	46520826	rs5773899	1_46520826_CA_C	1_46600917_A_G	1	new	rs1707302	0.97(0.91-1.03)	0.28	0.95(0.93-0.97)	1.8e-05	0.96(0.94-0.98)	5.7e-05	2.7e-09	2.29e-07	+++
chr1	46521091	46521091	rs785469	1_46521091_C_T	1_46600917_A_G	1	new	rs1707302	0.97(0.91-1.03)	0.28	0.95(0.93-0.97)	1.8e-05	0.96(0.94-0.98)	5.7e-05	2.7e-09	5.62e-07	+++
chr1	46521517	46521517	rs785468	1_46521517_G_A	1_46600917_A_G	1	new	rs1707302	0.97(0.91-1.03)	0.28	0.95(0.93-0.97)	1.8e-05	0.96(0.94-0.98)	5.7e-05	2.7e-09	5.63e-07	+++
chr1	46521559	46521559	rs785467	1_46521559_A_T	1_46600917_A_G	1	new	rs1707302	0.97(0.91-1.03)	0.28	0.95(0.93-0.97)	1.8e-05	0.96(0.94-0.98)	5.7e-05	2.7e-09	6.91e-07	+++
chr1	46521792	46521792	rs785466	1_46521792_G_A	1_46600917_A_G	1	new	rs1707302	0.97(0.91-1.03)	0.28	0.95(0.93-0.97)	1.8e-05	0.96(0.94-0.98)	5.7e-05	2.7e-09	7.51e-07	+++
chr1	46522577	46522577	rs785465	1_46522577_A_C	1_46600917_A_G	1	new	rs1707302	0.97(0.91-1.03)	0.28	0.95(0.93-0.97)	1.8e-05	0.96(0.94-0.98)	5.7e-05	2.7e-09	5.72e-07	+++
chr1	46523978	46523978	rs1085240	1_46523978_G_A	1_46600917_A_G	1	new	rs1707302	0.97(0.91-1.03)	0.28	0.95(0.93-0.97)	1.8e-05	0.96(0.94-0.98)	5.7e-05	2.7e-09	7.14e-07	+++
chr1	46524234	46524234	rs785463	1_46524234_G_A	1_46600917_A_G	1	new	rs1707302	0.97(0.91-1.03)	0.28	0.95(0.93-0.97)	1.8e-05	0.96(0.94-0.98)	5.7e-05	2.7e-09	7.35e-07	+++
chr1	46525751	46525751	rs785462	1_46525751_G_A	1_46600917_A_G	1	new	rs1707302	0.97(0.91-1.03)	0.28	0.95(0.93-0.97)	1.8e-05	0.96(0.94-0.98)	5.7e-05	2.7e-09	5.68e-07	+++
chr1	46527159	46527159	rs785508	1_46527159_G_A	1_46600917_A_G	1	new	rs1707302	0.97(0.91-1.03)	0.28	0.95(0.93-0.97)	1.8e-05	0.96(0.94-0.98)	5.7e-05	2.7e-09	1.36e-06	+++
chr1	46527300	46527300	rs785509	1_46527300_G_A	1_46600917_A_G	1	new	rs1707302	0.97(0.91-1.03)	0.28	0.95(0.93-0.97)	1.8e-05	0.96(0.94-0.98)	5.7e-05	2.7e-09	1.36e-06	+++
chr1	46528248	46528248	rs112919607	1_46528248_A_AAAAAAC	1_46600917_A_G	1	new	rs1707302	0.97(0.91-1.03)	0.28	0.95(0.93-0.97)	1.8e-05	0.96(0.94-0.98)	5.7e-05	2.7e-09	2.46e-07	+++
chr1	46528603	46528603	rs1768815	1_46528603_G_A	1_46600917_A_G	1	new	rs1707302	0.97(0.91-1.03)	0.28	0.95(0.93-0.97)	1.8e-05	0.96(0.94-0.98)	5.7e-05	2.7e-09	5.96e-07	+++
chr1	46528618	46528618	rs785510	1_46528618_T_C	1_46600917_A_G	1	new	rs1707302	0.97(0.91-1.03)	0.28	0.95(0.93-0.97)	1.8e-05	0.96(0.94-0.98)	5.7e-05	2.7e-09	7.4e-07	+++
chr1	46530798	46530798	rs2458400	1_46530798_C_T	1_46600917_A_G	1	new	rs1707302	0.97(0.91-1.03)	0.28	0.95(0.93-0.97)	1.8e-05	0.96(0.94-0.98)	5.7e-05	2.7e-09	6.43e-07	+++
chr1	46534543	46534543	rs785512	1_46534543_A_G	1_46600917_A_G	1	new	rs1707302	0.97(0.91-1.03)	0.28	0.95(0.93-0.97)	1.8e-05	0.96(0.94-0.98)	5.7e-05	2.7e-09	7.05e-07	+++
chr1	46538320	46538320	rs785513	1_46538320_T_C	1_46600917_A_G	1	new	rs1707302	0.97(0.91-1.03)	0.28	0.95(0.93-0.97)	1.8e-05	0.96(0.94-0.98)	5.7e-05	2.7e-09	1.56e-06	+++
chr1	46539458	46539458	rs35378730	1_46539458_AT_A	1_46600917_A_G	1	new	rs1707302	0.97(0.91-1.03)	0.28	0.95(0.93-0.97)	1.8e-05	0.96(0.94-0.98)	5.7e-05	2.7e-09	5.39e-07	+++
chr1	46539687	46539687	rs9429186	1_46539687_C_T	1_46600917_A_G	1	new	rs1707302	0.97(0.91-1.03)	0.28	0.95(0.93-0.97)	1.8e-05	0.96(0.94-0.98)	5.7e-05	2.7e-09	6.29e-07	+++
chr1	46540652	46540652	rs785506	1_46540652_C_T	1_46600917_A_G	1	new	rs1707302	0.97(0.91-1.03)	0.28	0.95(0.93-0.97)	1.8e-05	0.96(0.94-0.98)	5.7e-05	2.7e-09	6.29e-07	+++
chr1	46541558	46541558	rs785507	1_46541558_C_T	1_46600917_A_G	1	new	rs1707302	0.97(0.91-1.03)	0.28	0.95(0.93-0.97)	1.8e-05	0.96(0.94-0.98)	5.7e-05	2.7e-09	7.33e-07	+++
chr1	46544776	46544776	rs34234237	1_46544776_TA_T	1_46600917_A_G	1	new	rs1707302	0.97(0.91-1.03)	0.28	0.95(0.93-0.97)	1.8e-05	0.96(0.94-0.98)	5.7e-05	2.7e-09	2.23e-07	+++
chr1	46546852	46546852	rs1613296	1_46546852_T_G	1_46600917_A_G	1	new	rs1707302	0.97(0.91-1.03)	0.28	0.95(0.93-0.97)	1.8e-05	0.96(0.94-0.98)	5.7e-05	2.7e-09	6.48e-07	+++
chr1	46546945	46546945	rs1612419	1_46546945_T_C	1_46600917_A_G	1	new	rs1707302	0.97(0.91-1.03)	0.28	0.95(0.93-0.97)	1.8e-05	0.96(0.94-0.98)	5.7e-05	2.7e-09	7.66e-07	+++
chr1	46547868	46547868	rs1768802	1_46547868_A_G	1_46600917_A_G	1	new	rs1707302	0.97(0.91-1.03)	0.28	0.95(0.93-0.97)	1.8e-05	0.96(0.94-0.98)	5.7e-05	2.7e-09	6.19e-07	+++
chr1	46548825	46548825	rs1588663	1_46548825_G_A	1_46600917_A_G	1	new	rs1707302	0.97(0.91-1.03)	0.28	0.95(0.93-0.97)	1.8e-05	0.96(0.94-0.98)	5.7e-05	2.7e-09	6.28e-07	+++
chr1	46549137	46549137	rs1768801	1_46549137_C_G	1_46600917_A_G	1	new	rs1707302	0.97(0.91-1.03)	0.28	0.95(0.93-0.97)	1.8e-05	0.96(0.94-0.98)	5.7e-05	2.7e-09	6.28e-07	+++
chr1	46549188	46549188	rs1768800	1_46549188_A_G	1_46600917_A_G	1	new	rs1707302	0.97(0.91-1.03)	0.28	0.95(0.93-0.97)	1.8e-05	0.96(0.94-0.98)	5.7e-05	2.7e-09	6.28e-07	+++
chr1	46555984	46555984	rs143524711	1_46555984_TTTTA_T	1_46600917_A_G	1	new	rs1707302	0.97(0.91-1.03)	0.28	0.95(0.93-0.97)	1.8e-05	0.96(0.94-0.98)	5.7e-05	2.7e-09	1.28e-06	+++
chr1	46558492	46558492	rs35808728	1_46558492_T_TC	1_46600917_A_G	1	new	rs1707302	0.97(0.91-1.03)	0.28	0.95(0.93-0.97)	1.8e-05	0.96(0.94-0.98)	5.7e-05	2.7e-09	2.41e-07	+++
chr1	46559171	46559171	rs785483	1_46559171_T_C	1_46600917_A_G	1	new	rs1707302	0.97(0.91-1.03)	0.28	0.95(0.93-0.97)	1.8e-05	0.96(0.94-0.98)	5.7e-05	2.7e-09	6.2e-07	+++
chr1	46560244	46560244	rs809774	1_46560244_T_A	1_46600917_A_G	1	new	rs1707302	0.97(0.91-1.03)	0.28	0.95(0.93-0.97)	1.8e-05	0.96(0.94-0.98)	5.7e-05	2.7e-09	1.48e-06	+++
chr1	46564475	46564475	rs796773	1_46564475_C_T	1_46600917_A_G	1	new	rs1707302	0.97(0.91-1.03)	0.28	0.95(0.93-0.97)	1.8e-05	0.96(0.94-0.98)	5.7e-05	2.7e-09	6.14e-07	+++
chr1	46564539	46564539	rs59197560	1_46564539_A_AT	1_46600917_A_G	1	new	rs1707302	0.97(0.91-1.03)	0.28	0.95(0.93-0.97)	1.8e-05	0.96(0.94-0.98)	5.7e-05	2.7e-09	5.04e-07	+++
chr1	46564758	46564758	rs785516	1_46564758_T_G	1_46600917_A_G	1	new	rs1707302	0.97(0.91-1.03)	0.28	0.95(0.93-0.97)	1.8e-05	0.96(0.94-0.98)	5.7e-05	2.7e-09	7.34e-07	+++
chr1	46567535	46567535	rs785517	1_46567535_A_T	1_46600917_A_G	1	new	rs1707302	0.97(0.91-1.03)	0.28	0.95(0.93-0.97)	1.8e-05	0.96(0.94-0.98)	5.7e-05	2.7e-09	7.36e-07	+++
chr1	46568422	46568422	rs785518	1_46568422_A_T	1_46600917_A_G	1	new	rs1707302	0.97(0.91-1.03)	0.28	0.95(0.93-0.97)	1.8e-05	0.96(0.94-0.98)	5.7e-05	2.7e-09	6.13e-07	+++
chr1	46568562	46568562	rs785519	1_46568562_C_T	1_46600917_A_G	1	new	rs1707302	0.97(0.91-1.03)	0.28	0.95(0.93-0.97)	1.8e-05	0.96(0.94-0.98)	5.7e-05	2.7e-09	6.13e-07	+++
chr1	46574015	46574015	rs785484	1_46574015_T_C	1_46600917_A_G	1	new	rs1707302	0.97(0.91-1.03)	0.28	0.95(0.93-0.97)	1.8e-05	0.96(0.94-0.98)	5.7e-05	2.7e-09	8.69e-07	+++
chr1	46575148	46575148	rs785486	1_46575148_G_C	1_46600917_A_G	1	new	rs1707302	0.97(0.91-1.03)	0.28	0.95(0.93-0.97)	1.8e-05	0.96(0.94-0.98)	5.7e-05	2.7e-09	6.09e-07	+++
chr1	46577124	46577124	rs785490	1_46577124_T_C	1_46600917_A_G	1	new	rs1707302	0.97(0.91-1.03)	0.28	0.95(0.93-0.97)	1.8e-05	0.96(0.94-0.98)	5.7e-05	2.7e-09	7.31e-07	+++
chr1	46579611	46579611	rs785501	1_46579611_C_T	1_46600917_A_G	1	new	rs1707302	0.97(0.91-1.03)	0.28	0.95(0.93-0.97)	1.8e-05	0.96(0.94-0.98)	5.7e-05	2.7e-09	6.04e-07	+++
chr1	46583995	46583995	rs67716739	1_46583995_TC_T	1_46600917_A_G	1	new	rs1707302	0.97(0.91-1.03)	0.28	0.95(0.93-0.97)	1.8e-05	0.96(0.94-0.98)	5.7e-05	2.7e-09	2.53e-07	+++
chr1	46584859	46584859	rs785493	1_46584859_A_G	1_46600917_A_G	1	new	rs1707302	0.97(0.91-1.03)	0.28	0.95(0.93-0.97)	1.8e-05	0.96(0.94-0.98)	5.7e-05	2.7e-09	7.07e-07	+++
chr1	46588006	46588006	rs785496	1_46588006_T_C	1_46600917_A_G	1	new	rs1707302	0.97(0.91-1.03)	0.28	0.95(0.93-0.97)	1.8e-05	0.96(0.94-0.98)	5.7e-05	2.7e-09	7.02e-07	+++
chr1	46590468	46590468	rs55985922	1_46590468_CAA_C	1_46600917_A_G	1	new	rs1707302	0.97(0.91-1.03)	0.28	0.95(0.93-0.97)	1.8e-05	0.96(0.94-0.98)	5.7e-05	2.7e-09	1.81e-07	+++
chr1	46591623	46591623	rs814168	1_46591623_A_G	1_46600917_A_G	1	new	rs1707302	0.97(0.91-1.03)	0.28	0.95(0.93-0.97)	1.8e-05	0.96(0.94-0.98)	5.7e-05	2.7e-09	6.95e-07	+++
chr1	46591903	46591903	rs785497	1_46591903_G_C	1_46600917_A_G	1	new	rs1707302	0.97(0.91-1.03)	0.28	0.95(0.93-0.97)	1.8e-05	0.96(0.94-0.98)	5.7e-05	2.7e-09	6.97e-07	+++
chr1	46592414	46592414	rs785498	1_46592414_C_T	1_46600917_A_G	1	new	rs1707302	0.97(0.91-1.03)	0.28	0.95(0.93-0.97)	1.8e-05	0.96(0.94-0.98)	5.7e-05	2.7e-09	1.82e-06	+++
chr1	46592420	46592420	rs785499	1_46592420_G_A	1_46600917_A_G	1	new	rs1707302	0.97(0.91-1.03)	0.28	0.95(0.93-0.97)	1.8e-05	0.96(0.94-0.98)	5.7e-05	2.7e-09	9.36e-07	+++
chr1	46593044	46593044	rs785500	1_46593044_C_T	1_46600917_A_G	1	new	rs1707302	0.97(0.91-1.03)	0.28	0.95(0.93-0.97)	1.8e-05	0.96(0.94-0.98)	5.7e-05	2.7e-09	5.99e-07	+++
chr1	46595696	46595696	rs785504	1_46595696_C_T	1_46600917_A_G	1	new	rs1707302	0.97(0.91-1.03)	0.28	0.95(0.93-0.97)	1.8e-05	0.96(0.94-0.98)	5.7e-05	2.7e-09	5.67e-07	+++
chr1	46598273	46598273	rs1707303	1_46598273_A_C	1_46600917_A_G	1	new	rs1707302	0.97(0.91-1.03)	0.28	0.95(0.93-0.97)	1.8e-05	0.96(0.94-0.98)	5.7e-05	2.7e-09	4.45e-07	+++
chr1	46600917	46600917	rs1707302	1_46600917_A_G	1_46600917_A_G	1	new	rs1707302	0.97(0.91-1.03)	0.28	0.95(0.93-0.97)	1.8e-05	0.96(0.94-0.98)	5.7e-05	2.7e-09	2.95e-08	+++
chr1	46601197	46601197	rs1473840	1_46601197_A_G	1_46600917_A_G	1	new	rs1707302	0.97(0.91-1.03)	0.28	0.95(0.93-0.97)	1.8e-05	0.96(0.94-0.98)	5.7e-05	2.7e-09	3.66e-08	+++
chr1	46602844	46602844	rs1416706	1_46602844_G_A	1_46600917_A_G	1	new	rs1707302	0.97(0.91-1.03)	0.28	0.95(0.93-0.97)	1.8e-05	0.96(0.94-0.98)	5.7e-05	2.7e-09	4.35e-08	+++
chr1	46603348	46603348	rs9429095	1_46603348_T_G	1_46600917_A_G	1	new	rs1707302	0.97(0.91-1.03)	0.28	0.95(0.93-0.97)	1.8e-05	0.96(0.94-0.98)	5.7e-05	2.7e-09	3.97e-08	+++
chr1	46635895	46635895	rs12131635	1_46635895_T_C	1_46600917_A_G	1	new	rs1707302	0.97(0.91-1.03)	0.28	0.95(0.93-0.97)	1.8e-05	0.96(0.94-0.98)	5.7e-05	2.7e-09	2.28e-06	+++
chr1	46636888	46636888	rs72677567	1_46636888_C_T	1_46600917_A_G	1	new	rs1707302	0.97(0.91-1.03)	0.28	0.95(0.93-0.97)	1.8e-05	0.96(0.94-0.98)	5.7e-05	2.7e-09	2.81e-06	+++
chr1	46637840	46637840	rs9660699	1_46637840_T_C	1_46600917_A_G	1	new	rs1707302	0.97(0.91-1.03)	0.28	0.95(0.93-0.97)	1.8e-05	0.96(0.94-0.98)	5.7e-05	2.7e-09	2.59e-06	+++
chr1	46813589	46813589	rs7556425	1_46813589_A_G	1_46600917_A_G	1	new	rs1707302	0.97(0.91-1.03)	0.28	0.95(0.93-0.97)	1.8e-05	0.96(0.94-0.98)	5.7e-05	2.7e-09	2.13e-06	+++
chr1	46813619	46813619	rs61358317	1_46813619_G_T	1_46600917_A_G	1	new	rs1707302	0.97(0.91-1.03)	0.28	0.95(0.93-0.97)	1.8e-05	0.96(0.94-0.98)	5.7e-05	2.7e-09	2.13e-06	+++
chr1	46813635	46813635	rs7544951	1_46813635_C_T	1_46600917_A_G	1	new	rs1707302	0.97(0.91-1.03)	0.28	0.95(0.93-0.97)	1.8e-05	0.96(0.94-0.98)	5.7e-05	2.7e-09	2.13e-06	+++
chr1	46813663	46813663	rs60123014	1_46813663_C_T	1_46600917_A_G	1	new	rs1707302	0.97(0.91-1.03)	0.28	0.95(0.93-0.97)	1.8e-05	0.96(0.94-0.98)	5.7e-05	2.7e-09	2.13e-06	+++
chr1	50821587	50821587	rs77479875	1_50821587_A_C	1_50846032_CAAAGGGCAAGATCTCCTTTTT_C	1	new	rs140850326	1.05(0.99-1.12)	0.1	0.97(0.94-0.99)	0.0019	0.97(0.95-0.99)	0.00079	1.4e-06	3.29e-06	---
chr1	50829879	50829879	rs145905639	1_50829879_G_A	1_50846032_CAAAGGGCAAGATCTCCTTTTT_C	1	new	rs140850326	1.05(0.99-1.12)	0.1	0.97(0.94-0.99)	0.0019	0.97(0.95-0.99)	0.00079	1.4e-06	3.96e-08	---
chr1	50830896	50830896	rs115519621	1_50830896_T_A	1_50846032_CAAAGGGCAAGATCTCCTTTTT_C	1	new	rs140850326	1.05(0.99-1.12)	0.1	0.97(0.94-0.99)	0.0019	0.97(0.95-0.99)	0.00079	1.4e-06	4.52e-08	---
chr1	50833414	50833414	rs2653888	1_50833414_T_C	1_50846032_CAAAGGGCAAGATCTCCTTTTT_C	1	new	rs140850326	1.05(0.99-1.12)	0.1	0.97(0.94-0.99)	0.0019	0.97(0.95-0.99)	0.00079	1.4e-06	4.88e-08	---
chr1	50836955	50836955	rs12124357	1_50836955_A_G	1_50846032_CAAAGGGCAAGATCTCCTTTTT_C	1	new	rs140850326	1.05(0.99-1.12)	0.1	0.97(0.94-0.99)	0.0019	0.97(0.95-0.99)	0.00079	1.4e-06	5.95e-08	---
chr1	50838990	50838990	rs6660621	1_50838990_T_C	1_50846032_CAAAGGGCAAGATCTCCTTTTT_C	1	new	rs140850326	1.05(0.99-1.12)	0.1	0.97(0.94-0.99)	0.0019	0.97(0.95-0.99)	0.00079	1.4e-06	6.28e-08	---
chr1	50841382	50841382	rs7515823	1_50841382_G_A	1_50846032_CAAAGGGCAAGATCTCCTTTTT_C	1	new	rs140850326	1.05(0.99-1.12)	0.1	0.97(0.94-0.99)	0.0019	0.97(0.95-0.99)	0.00079	1.4e-06	6.18e-08	---
chr1	50843711	50843711	rs2455638	1_50843711_C_G	1_50846032_CAAAGGGCAAGATCTCCTTTTT_C	1	new	rs140850326	1.05(0.99-1.12)	0.1	0.97(0.94-0.99)	0.0019	0.97(0.95-0.99)	0.00079	1.4e-06	5.82e-08	---
chr1	50843776	50843776	rs2455637	1_50843776_A_C	1_50846032_CAAAGGGCAAGATCTCCTTTTT_C	1	new	rs140850326	1.05(0.99-1.12)	0.1	0.97(0.94-0.99)	0.0019	0.97(0.95-0.99)	0.00079	1.4e-06	5.82e-08	---
chr1	50844697	50844697	rs7525764	1_50844697_G_A	1_50846032_CAAAGGGCAAGATCTCCTTTTT_C	1	new	rs140850326	1.05(0.99-1.12)	0.1	0.97(0.94-0.99)	0.0019	0.97(0.95-0.99)	0.00079	1.4e-06	5.2e-08	---
chr1	50844859	50844859	rs7525876	1_50844859_G_C	1_50846032_CAAAGGGCAAGATCTCCTTTTT_C	1	new	rs140850326	1.05(0.99-1.12)	0.1	0.97(0.94-0.99)	0.0019	0.97(0.95-0.99)	0.00079	1.4e-06	5.79e-08	---
chr1	50844929	50844929	rs7517924	1_50844929_T_G	1_50846032_CAAAGGGCAAGATCTCCTTTTT_C	1	new	rs140850326	1.05(0.99-1.12)	0.1	0.97(0.94-0.99)	0.0019	0.97(0.95-0.99)	0.00079	1.4e-06	5.87e-08	---
chr1	50845365	50845365	rs2784152	1_50845365_T_G	1_50846032_CAAAGGGCAAGATCTCCTTTTT_C	1	new	rs140850326	1.05(0.99-1.12)	0.1	0.97(0.94-0.99)	0.0019	0.97(0.95-0.99)	0.00079	1.4e-06	5.69e-08	---
chr1	50845469	50845469	rs35231913	1_50845469_GTTT_G	1_50846032_CAAAGGGCAAGATCTCCTTTTT_C	1	new	rs140850326	1.05(0.99-1.12)	0.1	0.97(0.94-0.99)	0.0019	0.97(0.95-0.99)	0.00079	1.4e-06	3.95e-08	---
chr1	50845641	50845641	rs12731247	1_50845641_A_G	1_50846032_CAAAGGGCAAGATCTCCTTTTT_C	1	new	rs140850326	1.05(0.99-1.12)	0.1	0.97(0.94-0.99)	0.0019	0.97(0.95-0.99)	0.00079	1.4e-06	6e-08	---
chr1	50845804	50845804	rs12731855	1_50845804_G_T	1_50846032_CAAAGGGCAAGATCTCCTTTTT_C	1	new	rs140850326	1.05(0.99-1.12)	0.1	0.97(0.94-0.99)	0.0019	0.97(0.95-0.99)	0.00079	1.4e-06	5.97e-08	---
chr1	50846032	50846032	rs140850326	1_50846032_CAAAGGGCAAGATCTCCTTTTT_C	1_50846032_CAAAGGGCAAGATCTCCTTTTT_C	1	new	rs140850326	1.05(0.99-1.12)	0.1	0.97(0.94-0.99)	0.0019	0.97(0.95-0.99)	0.00079	1.4e-06	3.94e-08	---
chr1	50846286	50846286	rs2653893	1_50846286_A_G	1_50846032_CAAAGGGCAAGATCTCCTTTTT_C	1	new	rs140850326	1.05(0.99-1.12)	0.1	0.97(0.94-0.99)	0.0019	0.97(0.95-0.99)	0.00079	1.4e-06	5.51e-08	---
chr1	50846747	50846747	rs201499083	1_50846747_C_G	1_50846032_CAAAGGGCAAGATCTCCTTTTT_C	1	new	rs140850326	1.05(0.99-1.12)	0.1	0.97(0.94-0.99)	0.0019	0.97(0.95-0.99)	0.00079	1.4e-06	5.43e-08	---
chr1	50847109	50847109	rs9436893	1_50847109_C_G	1_50846032_CAAAGGGCAAGATCTCCTTTTT_C	1	new	rs140850326	1.05(0.99-1.12)	0.1	0.97(0.94-0.99)	0.0019	0.97(0.95-0.99)	0.00079	1.4e-06	5.36e-08	---
chr1	50848227	50848227	rs34048296	1_50848227_TA_T	1_50846032_CAAAGGGCAAGATCTCCTTTTT_C	1	new	rs140850326	1.05(0.99-1.12)	0.1	0.97(0.94-0.99)	0.0019	0.97(0.95-0.99)	0.00079	1.4e-06	1.01e-07	---
chr1	50848447	50848447	rs1502855	1_50848447_T_C	1_50846032_CAAAGGGCAAGATCTCCTTTTT_C	1	new	rs140850326	1.05(0.99-1.12)	0.1	0.97(0.94-0.99)	0.0019	0.97(0.95-0.99)	0.00079	1.4e-06	5.14e-08	---
chr1	50849156	50849156	rs2653900	1_50849156_G_A	1_50846032_CAAAGGGCAAGATCTCCTTTTT_C	1	new	rs140850326	1.05(0.99-1.12)	0.1	0.97(0.94-0.99)	0.0019	0.97(0.95-0.99)	0.00079	1.4e-06	5.03e-08	---
chr1	50849274	50849274	rs2484683	1_50849274_A_G	1_50846032_CAAAGGGCAAGATCTCCTTTTT_C	1	new	rs140850326	1.05(0.99-1.12)	0.1	0.97(0.94-0.99)	0.0019	0.97(0.95-0.99)	0.00079	1.4e-06	4.79e-08	---
chr1	50849364	50849364	rs2653899	1_50849364_T_C	1_50846032_CAAAGGGCAAGATCTCCTTTTT_C	1	new	rs140850326	1.05(0.99-1.12)	0.1	0.97(0.94-0.99)	0.0019	0.97(0.95-0.99)	0.00079	1.4e-06	4.98e-08	---
chr1	50849406	50849406	rs2653898	1_50849406_A_T	1_50846032_CAAAGGGCAAGATCTCCTTTTT_C	1	new	rs140850326	1.05(0.99-1.12)	0.1	0.97(0.94-0.99)	0.0019	0.97(0.95-0.99)	0.00079	1.4e-06	4.98e-08	---
chr1	50849547	50849547	rs2784138	1_50849547_C_T	1_50846032_CAAAGGGCAAGATCTCCTTTTT_C	1	new	rs140850326	1.05(0.99-1.12)	0.1	0.97(0.94-0.99)	0.0019	0.97(0.95-0.99)	0.00079	1.4e-06	4.96e-08	---
chr1	50851128	50851128	rs2784136	1_50851128_C_T	1_50846032_CAAAGGGCAAGATCTCCTTTTT_C	1	new	rs140850326	1.05(0.99-1.12)	0.1	0.97(0.94-0.99)	0.0019	0.97(0.95-0.99)	0.00079	1.4e-06	4.72e-08	---
chr1	50851189	50851189	rs2653896	1_50851189_A_C	1_50846032_CAAAGGGCAAGATCTCCTTTTT_C	1	new	rs140850326	1.05(0.99-1.12)	0.1	0.97(0.94-0.99)	0.0019	0.97(0.95-0.99)	0.00079	1.4e-06	4.72e-08	---
chr1	50851457	50851457	rs2653895	1_50851457_G_A	1_50846032_CAAAGGGCAAGATCTCCTTTTT_C	1	new	rs140850326	1.05(0.99-1.12)	0.1	0.97(0.94-0.99)	0.0019	0.97(0.95-0.99)	0.00079	1.4e-06	4.61e-08	---
chr1	50851923	50851923	rs4448561	1_50851923_T_A	1_50846032_CAAAGGGCAAGATCTCCTTTTT_C	1	new	rs140850326	1.05(0.99-1.12)	0.1	0.97(0.94-0.99)	0.0019	0.97(0.95-0.99)	0.00079	1.4e-06	4.55e-08	---
chr1	50852249	50852249	rs2784135	1_50852249_A_G	1_50846032_CAAAGGGCAAGATCTCCTTTTT_C	1	new	rs140850326	1.05(0.99-1.12)	0.1	0.97(0.94-0.99)	0.0019	0.97(0.95-0.99)	0.00079	1.4e-06	4.39e-08	---
chr1	50852720	50852720	rs2055492	1_50852720_A_G	1_50846032_CAAAGGGCAAGATCTCCTTTTT_C	1	new	rs140850326	1.05(0.99-1.12)	0.1	0.97(0.94-0.99)	0.0019	0.97(0.95-0.99)	0.00079	1.4e-06	7.08e-08	---
chr1	50852769	50852769	rs2055491	1_50852769_T_C	1_50846032_CAAAGGGCAAGATCTCCTTTTT_C	1	new	rs140850326	1.05(0.99-1.12)	0.1	0.97(0.94-0.99)	0.0019	0.97(0.95-0.99)	0.00079	1.4e-06	7.07e-08	---
chr1	50854197	50854197	rs7522339	1_50854197_G_C	1_50846032_CAAAGGGCAAGATCTCCTTTTT_C	1	new	rs140850326	1.05(0.99-1.12)	0.1	0.97(0.94-0.99)	0.0019	0.97(0.95-0.99)	0.00079	1.4e-06	6.06e-08	---
chr1	50854465	50854465	rs5027764	1_50854465_G_A	1_50846032_CAAAGGGCAAGATCTCCTTTTT_C	1	new	rs140850326	1.05(0.99-1.12)	0.1	0.97(0.94-0.99)	0.0019	0.97(0.95-0.99)	0.00079	1.4e-06	5.94e-08	---
chr1	50854654	50854654	rs5027763	1_50854654_A_G	1_50846032_CAAAGGGCAAGATCTCCTTTTT_C	1	new	rs140850326	1.05(0.99-1.12)	0.1	0.97(0.94-0.99)	0.0019	0.97(0.95-0.99)	0.00079	1.4e-06	5.8e-08	---
chr1	50855083	50855083	rs12137724	1_50855083_A_G	1_50846032_CAAAGGGCAAGATCTCCTTTTT_C	1	new	rs140850326	1.05(0.99-1.12)	0.1	0.97(0.94-0.99)	0.0019	0.97(0.95-0.99)	0.00079	1.4e-06	5.83e-08	---
chr1	50855137	50855137	rs34660213	1_50855137_A_G	1_50846032_CAAAGGGCAAGATCTCCTTTTT_C	1	new	rs140850326	1.05(0.99-1.12)	0.1	0.97(0.94-0.99)	0.0019	0.97(0.95-0.99)	0.00079	1.4e-06	5.81e-08	---
chr1	50855207	50855207	rs12134378	1_50855207_T_A	1_50846032_CAAAGGGCAAGATCTCCTTTTT_C	1	new	rs140850326	1.05(0.99-1.12)	0.1	0.97(0.94-0.99)	0.0019	0.97(0.95-0.99)	0.00079	1.4e-06	5.79e-08	---
chr1	50855284	50855284	rs12145267	1_50855284_C_T	1_50846032_CAAAGGGCAAGATCTCCTTTTT_C	1	new	rs140850326	1.05(0.99-1.12)	0.1	0.97(0.94-0.99)	0.0019	0.97(0.95-0.99)	0.00079	1.4e-06	5.77e-08	---
chr1	50855708	50855708	rs2784133	1_50855708_A_G	1_50846032_CAAAGGGCAAGATCTCCTTTTT_C	1	new	rs140850326	1.05(0.99-1.12)	0.1	0.97(0.94-0.99)	0.0019	0.97(0.95-0.99)	0.00079	1.4e-06	5.73e-08	---
chr1	50855924	50855924	rs2653887	1_50855924_A_G	1_50846032_CAAAGGGCAAGATCTCCTTTTT_C	1	new	rs140850326	1.05(0.99-1.12)	0.1	0.97(0.94-0.99)	0.0019	0.97(0.95-0.99)	0.00079	1.4e-06	5.68e-08	---
chr1	50856193	50856193	rs2653886	1_50856193_T_A	1_50846032_CAAAGGGCAAGATCTCCTTTTT_C	1	new	rs140850326	1.05(0.99-1.12)	0.1	0.97(0.94-0.99)	0.0019	0.97(0.95-0.99)	0.00079	1.4e-06	5.62e-08	---
chr1	50856277	50856277	rs2653885	1_50856277_T_C	1_50846032_CAAAGGGCAAGATCTCCTTTTT_C	1	new	rs140850326	1.05(0.99-1.12)	0.1	0.97(0.94-0.99)	0.0019	0.97(0.95-0.99)	0.00079	1.4e-06	5.59e-08	---
chr1	50856537	50856537	rs2784132	1_50856537_G_T	1_50846032_CAAAGGGCAAGATCTCCTTTTT_C	1	new	rs140850326	1.05(0.99-1.12)	0.1	0.97(0.94-0.99)	0.0019	0.97(0.95-0.99)	0.00079	1.4e-06	5.61e-08	---
chr1	50857713	50857713	rs2784131	1_50857713_T_A	1_50846032_CAAAGGGCAAGATCTCCTTTTT_C	1	new	rs140850326	1.05(0.99-1.12)	0.1	0.97(0.94-0.99)	0.0019	0.97(0.95-0.99)	0.00079	1.4e-06	5.88e-08	---
chr1	50858087	50858087	rs2653884	1_50858087_A_G	1_50846032_CAAAGGGCAAGATCTCCTTTTT_C	1	new	rs140850326	1.05(0.99-1.12)	0.1	0.97(0.94-0.99)	0.0019	0.97(0.95-0.99)	0.00079	1.4e-06	5.35e-08	---
chr1	50858252	50858252	rs2653883	1_50858252_A_G	1_50846032_CAAAGGGCAAGATCTCCTTTTT_C	1	new	rs140850326	1.05(0.99-1.12)	0.1	0.97(0.94-0.99)	0.0019	0.97(0.95-0.99)	0.00079	1.4e-06	5.35e-08	---
chr1	50858272	50858272	rs2784130	1_50858272_G_A	1_50846032_CAAAGGGCAAGATCTCCTTTTT_C	1	new	rs140850326	1.05(0.99-1.12)	0.1	0.97(0.94-0.99)	0.0019	0.97(0.95-0.99)	0.00079	1.4e-06	5.35e-08	---
chr1	50858518	50858518	rs2653882	1_50858518_C_G	1_50846032_CAAAGGGCAAGATCTCCTTTTT_C	1	new	rs140850326	1.05(0.99-1.12)	0.1	0.97(0.94-0.99)	0.0019	0.97(0.95-0.99)	0.00079	1.4e-06	5.71e-08	---
chr1	50858748	50858748	rs2653881	1_50858748_G_A	1_50846032_CAAAGGGCAAGATCTCCTTTTT_C	1	new	rs140850326	1.05(0.99-1.12)	0.1	0.97(0.94-0.99)	0.0019	0.97(0.95-0.99)	0.00079	1.4e-06	5.72e-08	---
chr1	50860499	50860499	rs2784129	1_50860499_C_A	1_50846032_CAAAGGGCAAGATCTCCTTTTT_C	1	new	rs140850326	1.05(0.99-1.12)	0.1	0.97(0.94-0.99)	0.0019	0.97(0.95-0.99)	0.00079	1.4e-06	5.84e-08	---
chr1	50861220	50861220	rs2653878	1_50861220_A_C	1_50846032_CAAAGGGCAAGATCTCCTTTTT_C	1	new	rs140850326	1.05(0.99-1.12)	0.1	0.97(0.94-0.99)	0.0019	0.97(0.95-0.99)	0.00079	1.4e-06	6.86e-08	---
chr1	50861621	50861621	rs2653877	1_50861621_C_T	1_50846032_CAAAGGGCAAGATCTCCTTTTT_C	1	new	rs140850326	1.05(0.99-1.12)	0.1	0.97(0.94-0.99)	0.0019	0.97(0.95-0.99)	0.00079	1.4e-06	5.06e-07	---
chr1	50861987	50861987	rs6676515	1_50861987_G_A	1_50846032_CAAAGGGCAAGATCTCCTTTTT_C	1	new	rs140850326	1.05(0.99-1.12)	0.1	0.97(0.94-0.99)	0.0019	0.97(0.95-0.99)	0.00079	1.4e-06	7.07e-08	---
chr1	50894456	50894456	rs36049205	1_50894456_AG_A	1_50846032_CAAAGGGCAAGATCTCCTTTTT_C	1	new	rs140850326	1.05(0.99-1.12)	0.1	0.97(0.94-0.99)	0.0019	0.97(0.95-0.99)	0.00079	1.4e-06	6.34e-07	---
chr1	51103268	51103268	rs12031188	1_51103268_T_C	1_50846032_CAAAGGGCAAGATCTCCTTTTT_C	1	new	rs140850326	1.05(0.99-1.12)	0.1	0.97(0.94-0.99)	0.0019	0.97(0.95-0.99)	0.00079	1.4e-06	1.75e-06	---
chr1	51129670	51129670	rs11333750	1_51129670_CT_C	1_50846032_CAAAGGGCAAGATCTCCTTTTT_C	1	new	rs140850326	1.05(0.99-1.12)	0.1	0.97(0.94-0.99)	0.0019	0.97(0.95-0.99)	0.00079	1.4e-06	2.07e-06	+++
chr1	51159671	51159671	rs3033489	1_51159671_TTA_T	1_50846032_CAAAGGGCAAGATCTCCTTTTT_C	1	new	rs140850326	1.05(0.99-1.12)	0.1	0.97(0.94-0.99)	0.0019	0.97(0.95-0.99)	0.00079	1.4e-06	3.22e-06	---
chr1	51189909	51189909	1:51189909	1_51189909_CA_C	1_50846032_CAAAGGGCAAGATCTCCTTTTT_C	1	new	rs140850326	1.05(0.99-1.12)	0.1	0.97(0.94-0.99)	0.0019	0.97(0.95-0.99)	0.00079	1.4e-06	1.33e-06	+++
chr1	51235019	51235019	rs6691061	1_51235019_T_C	1_50846032_CAAAGGGCAAGATCTCCTTTTT_C	1	new	rs140850326	1.05(0.99-1.12)	0.1	0.97(0.94-0.99)	0.0019	0.97(0.95-0.99)	0.00079	1.4e-06	3.37e-07	+++
chr1	51236592	51236592	rs11588333	1_51236592_C_T	1_50846032_CAAAGGGCAAGATCTCCTTTTT_C	1	new	rs140850326	1.05(0.99-1.12)	0.1	0.97(0.94-0.99)	0.0019	0.97(0.95-0.99)	0.00079	1.4e-06	1.03e-06	+++
chr1	51237194	51237194	rs10888708	1_51237194_T_C	1_50846032_CAAAGGGCAAGATCTCCTTTTT_C	1	new	rs140850326	1.05(0.99-1.12)	0.1	0.97(0.94-0.99)	0.0019	0.97(0.95-0.99)	0.00079	1.4e-06	3.18e-07	+++
chr1	51237409	51237409	rs12569177	1_51237409_G_C	1_50846032_CAAAGGGCAAGATCTCCTTTTT_C	1	new	rs140850326	1.05(0.99-1.12)	0.1	0.97(0.94-0.99)	0.0019	0.97(0.95-0.99)	0.00079	1.4e-06	3.04e-07	+++
chr1	51242674	51242674	rs12084257	1_51242674_C_G	1_50846032_CAAAGGGCAAGATCTCCTTTTT_C	1	new	rs140850326	1.05(0.99-1.12)	0.1	0.97(0.94-0.99)	0.0019	0.97(0.95-0.99)	0.00079	1.4e-06	3.09e-07	+++
chr1	51257608	51257608	rs7522611	1_51257608_T_C	1_50846032_CAAAGGGCAAGATCTCCTTTTT_C	1	new	rs140850326	1.05(0.99-1.12)	0.1	0.97(0.94-0.99)	0.0019	0.97(0.95-0.99)	0.00079	1.4e-06	3.29e-07	+++
chr1	51259579	51259579	rs72690493	1_51259579_T_C	1_50846032_CAAAGGGCAAGATCTCCTTTTT_C	1	new	rs140850326	1.05(0.99-1.12)	0.1	0.97(0.94-0.99)	0.0019	0.97(0.95-0.99)	0.00079	1.4e-06	1.05e-06	+++
chr1	51259645	51259645	rs6671962	1_51259645_A_G	1_50846032_CAAAGGGCAAGATCTCCTTTTT_C	1	new	rs140850326	1.05(0.99-1.12)	0.1	0.97(0.94-0.99)	0.0019	0.97(0.95-0.99)	0.00079	1.4e-06	3.22e-07	+++
chr1	51262960	51262960	rs7552837	1_51262960_C_T	1_50846032_CAAAGGGCAAGATCTCCTTTTT_C	1	new	rs140850326	1.05(0.99-1.12)	0.1	0.97(0.94-0.99)	0.0019	0.97(0.95-0.99)	0.00079	1.4e-06	2.82e-07	+++
chr1	51273357	51273357	rs6588392	1_51273357_C_G	1_50846032_CAAAGGGCAAGATCTCCTTTTT_C	1	new	rs140850326	1.05(0.99-1.12)	0.1	0.97(0.94-0.99)	0.0019	0.97(0.95-0.99)	0.00079	1.4e-06	9.93e-07	+++
chr1	51285461	51285461	rs1972100	1_51285461_A_G	1_50846032_CAAAGGGCAAGATCTCCTTTTT_C	1	new	rs140850326	1.05(0.99-1.12)	0.1	0.97(0.94-0.99)	0.0019	0.97(0.95-0.99)	0.00079	1.4e-06	8.98e-07	+++
chr1	51298828	51298828	rs6684901	1_51298828_A_G	1_50846032_CAAAGGGCAAGATCTCCTTTTT_C	1	new	rs140850326	1.05(0.99-1.12)	0.1	0.97(0.94-0.99)	0.0019	0.97(0.95-0.99)	0.00079	1.4e-06	2.72e-07	+++
chr1	51314782	51314782	rs10888709	1_51314782_A_C	1_50846032_CAAAGGGCAAGATCTCCTTTTT_C	1	new	rs140850326	1.05(0.99-1.12)	0.1	0.97(0.94-0.99)	0.0019	0.97(0.95-0.99)	0.00079	1.4e-06	2.87e-07	+++
chr1	51337868	51337868	rs6700139	1_51337868_T_C	1_50846032_CAAAGGGCAAGATCTCCTTTTT_C	1	new	rs140850326	1.05(0.99-1.12)	0.1	0.97(0.94-0.99)	0.0019	0.97(0.95-0.99)	0.00079	1.4e-06	8.66e-07	+++
chr1	51340598	51340598	rs58235906	1_51340598_T_C	1_50846032_CAAAGGGCAAGATCTCCTTTTT_C	1	new	rs140850326	1.05(0.99-1.12)	0.1	0.97(0.94-0.99)	0.0019	0.97(0.95-0.99)	0.00079	1.4e-06	2.79e-07	+++
chr1	88149847	88149847	rs7522810	1_88149847_G_A	1_88156923_G_A	1	new	rs17426269	1.12(1.03-1.21)	0.011	1.05(1.01-1.08)	0.0044	1.06(1.03-1.09)	1.2e-05	1.9e-09	1.63e-06	+++
chr1	88156923	88156923	rs17426269	1_88156923_G_A	1_88156923_G_A	1	new	rs17426269	1.12(1.03-1.21)	0.011	1.05(1.01-1.08)	0.0044	1.06(1.03-1.09)	1.2e-05	1.9e-09	1.74e-08	+++
chr1	88164216	88164216	rs17460200	1_88164216_C_T	1_88156923_G_A	1	new	rs17426269	1.12(1.03-1.21)	0.011	1.05(1.01-1.08)	0.0044	1.06(1.03-1.09)	1.2e-05	1.9e-09	9.71e-07	+++
chr1	88419705	88419705	rs3008455	1_88419705_G_A	1_88156923_G_A	1	new	rs17426269	1.12(1.03-1.21)	0.011	1.05(1.01-1.08)	0.0044	1.06(1.03-1.09)	1.2e-05	1.9e-09	6.19e-08	---
chr1	88428199	88428199	rs2151842	1_88428199_C_A	1_88156923_G_A	1	new	rs17426269	1.12(1.03-1.21)	0.011	1.05(1.01-1.08)	0.0044	1.06(1.03-1.09)	1.2e-05	1.9e-09	3.81e-08	---
chr1	88429024	88429024	rs11583393	1_88429024_C_A	1_88156923_G_A	1	new	rs17426269	1.12(1.03-1.21)	0.011	1.05(1.01-1.08)	0.0044	1.06(1.03-1.09)	1.2e-05	1.9e-09	3.61e-08	---
chr1	114173410	114173410	rs1230666	1_114173410_A_G	1_114448389_C_T	1	old	rs11552449	1.09(1.01-1.18)	0.035	1.08(1.05-1.11)	3.1e-07	1.04(1.01-1.06)	0.0095	1.2e-08	3.87e-10	---
chr1	114422976	114422976	rs1217383	1_114422976_T_A	1_114448389_C_T	1	old	rs11552449	1.09(1.01-1.18)	0.035	1.08(1.05-1.11)	3.1e-07	1.04(1.01-1.06)	0.0095	1.2e-08	1.55e-09	---
chr1	114426001	114426001	rs11102694	1_114426001_G_A	1_114448389_C_T	1	old	rs11552449	1.09(1.01-1.18)	0.035	1.08(1.05-1.11)	3.1e-07	1.04(1.01-1.06)	0.0095	1.2e-08	3.08e-11	+++
chr1	114429461	114429461	rs2358994	1_114429461_G_A	1_114448389_C_T	1	old	rs11552449	1.09(1.01-1.18)	0.035	1.08(1.05-1.11)	3.1e-07	1.04(1.01-1.06)	0.0095	1.2e-08	5.05e-11	+++
chr1	114429515	114429515	rs2358995	1_114429515_A_C	1_114448389_C_T	1	old	rs11552449	1.09(1.01-1.18)	0.035	1.08(1.05-1.11)	3.1e-07	1.04(1.01-1.06)	0.0095	1.2e-08	5.26e-11	+++
chr1	114431463	114431463	rs7547478	1_114431463_G_A	1_114448389_C_T	1	old	rs11552449	1.09(1.01-1.18)	0.035	1.08(1.05-1.11)	3.1e-07	1.04(1.01-1.06)	0.0095	1.2e-08	3.47e-11	+++
chr1	114445880	114445880	rs7513707	1_114445880_G_A	1_114448389_C_T	1	old	rs11552449	1.09(1.01-1.18)	0.035	1.08(1.05-1.11)	3.1e-07	1.04(1.01-1.06)	0.0095	1.2e-08	1.7e-11	+++
chr1	114448389	114448389	rs11552449	1_114448389_C_T	1_114448389_C_T	1	old	rs11552449	1.09(1.01-1.18)	0.035	1.08(1.05-1.11)	3.1e-07	1.04(1.01-1.06)	0.0095	1.2e-08	4.64e-11	+++
chr1	114449662	114449662	rs3761936	1_114449662_T_C	1_114448389_C_T	1	old	rs11552449	1.09(1.01-1.18)	0.035	1.08(1.05-1.11)	3.1e-07	1.04(1.01-1.06)	0.0095	1.2e-08	4.42e-11	+++
chr1	114449829	114449829	rs11102701	1_114449829_T_A	1_114448389_C_T	1	old	rs11552449	1.09(1.01-1.18)	0.035	1.08(1.05-1.11)	3.1e-07	1.04(1.01-1.06)	0.0095	1.2e-08	4.04e-11	+++
chr1	114450964	114450964	rs11102702	1_114450964_T_C	1_114448389_C_T	1	old	rs11552449	1.09(1.01-1.18)	0.035	1.08(1.05-1.11)	3.1e-07	1.04(1.01-1.06)	0.0095	1.2e-08	7.77e-11	+++
chr1	118195233	118195233	rs319497	1_118195233_T_C	1_118230221_T_C	1	new	rs7529522	1.02(0.93-1.11)	0.68	1.02(0.99-1.04)	0.22	1.07(1.04-1.09)	2.6e-08	6.9e-07	1.64e-09	+++
chr1	118195592	118195592	rs17185310	1_118195592_G_A	1_118230221_T_C	1	new	rs7529522	1.02(0.93-1.11)	0.68	1.02(0.99-1.04)	0.22	1.07(1.04-1.09)	2.6e-08	6.9e-07	8.7e-09	+++
chr1	118205526	118205526	rs7536847	1_118205526_G_T	1_118230221_T_C	1	new	rs7529522	1.02(0.93-1.11)	0.68	1.02(0.99-1.04)	0.22	1.07(1.04-1.09)	2.6e-08	6.9e-07	6.66e-10	+++
chr1	118208712	118208712	rs67529884	1_118208712_C_T	1_118230221_T_C	1	new	rs7529522	1.02(0.93-1.11)	0.68	1.02(0.99-1.04)	0.22	1.07(1.04-1.09)	2.6e-08	6.9e-07	5.97e-10	+++
chr1	118215086	118215086	rs7544119	1_118215086_C_A	1_118230221_T_C	1	new	rs7529522	1.02(0.93-1.11)	0.68	1.02(0.99-1.04)	0.22	1.07(1.04-1.09)	2.6e-08	6.9e-07	8.05e-10	+++
chr1	118220520	118220520	rs10801978	1_118220520_C_T	1_118230221_T_C	1	new	rs7529522	1.02(0.93-1.11)	0.68	1.02(0.99-1.04)	0.22	1.07(1.04-1.09)	2.6e-08	6.9e-07	3.71e-10	+++
chr1	118221678	118221678	rs10923383	1_118221678_A_G	1_118230221_T_C	1	new	rs7529522	1.02(0.93-1.11)	0.68	1.02(0.99-1.04)	0.22	1.07(1.04-1.09)	2.6e-08	6.9e-07	6.35e-10	+++
chr1	118222194	118222194	rs7518241	1_118222194_A_G	1_118230221_T_C	1	new	rs7529522	1.02(0.93-1.11)	0.68	1.02(0.99-1.04)	0.22	1.07(1.04-1.09)	2.6e-08	6.9e-07	5.67e-10	+++
chr1	118227724	118227724	rs72695526	1_118227724_A_G	1_118230221_T_C	1	new	rs7529522	1.02(0.93-1.11)	0.68	1.02(0.99-1.04)	0.22	1.07(1.04-1.09)	2.6e-08	6.9e-07	1.44e-08	+++
chr1	118229436	118229436	rs12568104	1_118229436_T_C	1_118230221_T_C	1	new	rs7529522	1.02(0.93-1.11)	0.68	1.02(0.99-1.04)	0.22	1.07(1.04-1.09)	2.6e-08	6.9e-07	1.45e-08	+++
chr1	118230221	118230221	rs7529522	1_118230221_T_C	1_118230221_T_C	1	new	rs7529522	1.02(0.93-1.11)	0.68	1.02(0.99-1.04)	0.22	1.07(1.04-1.09)	2.6e-08	6.9e-07	1.73e-10	+++
chr1	121280613	121280613	rs11249433	1_121280613_A_G	1_121280613_A_G	1	old	rs11249433	1.18(1.01-1.37)	0.039	1.12(1.09-1.14)	5.4e-22	1.14(1.12-1.16)	3.2e-37	4.7e-58	1.76e-52	+++
chr1	145588184	145588184	rs2004659	1_145588184_T_C	1_145644984_C_T	1	old	rs12405132	0.93(0.86-1.01)	0.091	0.94(0.91-0.96)	2.9e-08	0.97(0.95-0.99)	0.002	5.6e-10	1.79e-09	---
chr1	145588536	145588536	rs9286836	1_145588536_C_T	1_145644984_C_T	1	old	rs12405132	0.93(0.86-1.01)	0.091	0.94(0.91-0.96)	2.9e-08	0.97(0.95-0.99)	0.002	5.6e-10	1.98e-09	+++
chr1	145591688	145591688	rs145373166	1_145591688_AAAC_A	1_145644984_C_T	1	old	rs12405132	0.93(0.86-1.01)	0.091	0.94(0.91-0.96)	2.9e-08	0.97(0.95-0.99)	0.002	5.6e-10	3.92e-09	+++
chr1	145591853	145591853	rs71885741	1_145591853_TAC_T	1_145644984_C_T	1	old	rs12405132	0.93(0.86-1.01)	0.091	0.94(0.91-0.96)	2.9e-08	0.97(0.95-0.99)	0.002	5.6e-10	1.69e-09	---
chr1	145592073	145592073	rs9729027	1_145592073_A_T	1_145644984_C_T	1	old	rs12405132	0.93(0.86-1.01)	0.091	0.94(0.91-0.96)	2.9e-08	0.97(0.95-0.99)	0.002	5.6e-10	6.66e-10	+++
chr1	145594799	145594799	rs1887806	1_145594799_C_T	1_145644984_C_T	1	old	rs12405132	0.93(0.86-1.01)	0.091	0.94(0.91-0.96)	2.9e-08	0.97(0.95-0.99)	0.002	5.6e-10	6.79e-10	+++
chr1	145595423	145595423	rs913513	1_145595423_G_A	1_145644984_C_T	1	old	rs12405132	0.93(0.86-1.01)	0.091	0.94(0.91-0.96)	2.9e-08	0.97(0.95-0.99)	0.002	5.6e-10	6.95e-10	+++
chr1	145595820	145595820	rs2018027	1_145595820_A_G	1_145644984_C_T	1	old	rs12405132	0.93(0.86-1.01)	0.091	0.94(0.91-0.96)	2.9e-08	0.97(0.95-0.99)	0.002	5.6e-10	7.76e-10	+++
chr1	145597417	145597417	rs9728345	1_145597417_C_A	1_145644984_C_T	1	old	rs12405132	0.93(0.86-1.01)	0.091	0.94(0.91-0.96)	2.9e-08	0.97(0.95-0.99)	0.002	5.6e-10	5.26e-10	---
chr1	145599038	145599038	rs11587821	1_145599038_G_T	1_145644984_C_T	1	old	rs12405132	0.93(0.86-1.01)	0.091	0.94(0.91-0.96)	2.9e-08	0.97(0.95-0.99)	0.002	5.6e-10	5.37e-10	---
chr1	145600127	145600127	rs34635911	1_145600127_A_AT	1_145644984_C_T	1	old	rs12405132	0.93(0.86-1.01)	0.091	0.94(0.91-0.96)	2.9e-08	0.97(0.95-0.99)	0.002	5.6e-10	1.77e-09	---
chr1	145602791	145602791	rs10752826	1_145602791_C_G	1_145644984_C_T	1	old	rs12405132	0.93(0.86-1.01)	0.091	0.94(0.91-0.96)	2.9e-08	0.97(0.95-0.99)	0.002	5.6e-10	6.38e-10	+++
chr1	145604302	145604302	rs72127681	1_145604302_C_CT	1_145644984_C_T	1	old	rs12405132	0.93(0.86-1.01)	0.091	0.94(0.91-0.96)	2.9e-08	0.97(0.95-0.99)	0.002	5.6e-10	6.1e-11	---
chr1	145604791	145604791	rs36107432	1_145604791_G_T	1_145644984_C_T	1	old	rs12405132	0.93(0.86-1.01)	0.091	0.94(0.91-0.96)	2.9e-08	0.97(0.95-0.99)	0.002	5.6e-10	2.31e-10	---
chr1	145605318	145605318	rs4970859	1_145605318_C_T	1_145644984_C_T	1	old	rs12405132	0.93(0.86-1.01)	0.091	0.94(0.91-0.96)	2.9e-08	0.97(0.95-0.99)	0.002	5.6e-10	5.28e-10	---
chr1	145607103	145607103	rs11319703	1_145607103_AC_A	1_145644984_C_T	1	old	rs12405132	0.93(0.86-1.01)	0.091	0.94(0.91-0.96)	2.9e-08	0.97(0.95-0.99)	0.002	5.6e-10	1.88e-09	---
chr1	145607333	145607333	rs10752827	1_145607333_A_T	1_145644984_C_T	1	old	rs12405132	0.93(0.86-1.01)	0.091	0.94(0.91-0.96)	2.9e-08	0.97(0.95-0.99)	0.002	5.6e-10	1.58e-09	+++
chr1	145609971	145609971	rs12402787	1_145609971_T_C	1_145644984_C_T	1	old	rs12405132	0.93(0.86-1.01)	0.091	0.94(0.91-0.96)	2.9e-08	0.97(0.95-0.99)	0.002	5.6e-10	5.16e-10	---
chr1	145612569	145612569	rs368010458	1_145612569_G_C	1_145644984_C_T	1	old	rs12405132	0.93(0.86-1.01)	0.091	0.94(0.91-0.96)	2.9e-08	0.97(0.95-0.99)	0.002	5.6e-10	5.29e-10	---
chr1	145614236	145614236	rs369061954	1_145614236_A_G	1_145644984_C_T	1	old	rs12405132	0.93(0.86-1.01)	0.091	0.94(0.91-0.96)	2.9e-08	0.97(0.95-0.99)	0.002	5.6e-10	5.01e-10	---
chr1	145614468	145614468	rs61816194	1_145614468_C_T	1_145644984_C_T	1	old	rs12405132	0.93(0.86-1.01)	0.091	0.94(0.91-0.96)	2.9e-08	0.97(0.95-0.99)	0.002	5.6e-10	6.23e-10	---
chr1	145619476	145619476	rs146915990	1_145619476_G_A	1_145644984_C_T	1	old	rs12405132	0.93(0.86-1.01)	0.091	0.94(0.91-0.96)	2.9e-08	0.97(0.95-0.99)	0.002	5.6e-10	4.29e-10	---
chr1	145622067	145622067	rs5777573	1_145622067_G_GT	1_145644984_C_T	1	old	rs12405132	0.93(0.86-1.01)	0.091	0.94(0.91-0.96)	2.9e-08	0.97(0.95-0.99)	0.002	5.6e-10	5.11e-09	---
chr1	145622421	145622421	rs201238699	1_145622421_G_GT	1_145644984_C_T	1	old	rs12405132	0.93(0.86-1.01)	0.091	0.94(0.91-0.96)	2.9e-08	0.97(0.95-0.99)	0.002	5.6e-10	7.36e-10	---
chr1	145625882	145625882	1:145625882	1_145625882_CAA_C	1_145644984_C_T	1	old	rs12405132	0.93(0.86-1.01)	0.091	0.94(0.91-0.96)	2.9e-08	0.97(0.95-0.99)	0.002	5.6e-10	1.3e-09	+++
chr1	145630536	145630536	rs12732381	1_145630536_T_A	1_145644984_C_T	1	old	rs12405132	0.93(0.86-1.01)	0.091	0.94(0.91-0.96)	2.9e-08	0.97(0.95-0.99)	0.002	5.6e-10	5.08e-10	---
chr1	145631820	145631820	rs34429316	1_145631820_GA_G	1_145644984_C_T	1	old	rs12405132	0.93(0.86-1.01)	0.091	0.94(0.91-0.96)	2.9e-08	0.97(0.95-0.99)	0.002	5.6e-10	2.05e-09	---
chr1	145632500	145632500	rs17354594	1_145632500_A_G	1_145644984_C_T	1	old	rs12405132	0.93(0.86-1.01)	0.091	0.94(0.91-0.96)	2.9e-08	0.97(0.95-0.99)	0.002	5.6e-10	5.6e-10	---
chr1	145636226	145636226	rs12402867	1_145636226_G_A	1_145644984_C_T	1	old	rs12405132	0.93(0.86-1.01)	0.091	0.94(0.91-0.96)	2.9e-08	0.97(0.95-0.99)	0.002	5.6e-10	6.3e-10	---
chr1	145639324	145639324	rs12724816	1_145639324_G_T	1_145644984_C_T	1	old	rs12405132	0.93(0.86-1.01)	0.091	0.94(0.91-0.96)	2.9e-08	0.97(0.95-0.99)	0.002	5.6e-10	6.98e-10	---
chr1	145640157	145640157	rs11583404	1_145640157_T_C	1_145644984_C_T	1	old	rs12405132	0.93(0.86-1.01)	0.091	0.94(0.91-0.96)	2.9e-08	0.97(0.95-0.99)	0.002	5.6e-10	6.74e-10	---
chr1	145644984	145644984	rs12405132	1_145644984_C_T	1_145644984_C_T	1	old	rs12405132	0.93(0.86-1.01)	0.091	0.94(0.91-0.96)	2.9e-08	0.97(0.95-0.99)	0.002	5.6e-10	6.3e-10	---
chr1	145645606	145645606	rs12744221	1_145645606_C_T	1_145644984_C_T	1	old	rs12405132	0.93(0.86-1.01)	0.091	0.94(0.91-0.96)	2.9e-08	0.97(0.95-0.99)	0.002	5.6e-10	6.4e-10	---
chr1	145645820	145645820	rs12729321	1_145645820_G_T	1_145644984_C_T	1	old	rs12405132	0.93(0.86-1.01)	0.091	0.94(0.91-0.96)	2.9e-08	0.97(0.95-0.99)	0.002	5.6e-10	6.49e-10	---
chr1	145651861	145651861	rs2040085	1_145651861_G_A	1_145644984_C_T	1	old	rs12405132	0.93(0.86-1.01)	0.091	0.94(0.91-0.96)	2.9e-08	0.97(0.95-0.99)	0.002	5.6e-10	8.01e-10	---
chr1	145651876	145651876	rs2040086	1_145651876_C_A	1_145644984_C_T	1	old	rs12405132	0.93(0.86-1.01)	0.091	0.94(0.91-0.96)	2.9e-08	0.97(0.95-0.99)	0.002	5.6e-10	8.54e-10	---
chr1	145660663	145660663	rs2799107	1_145660663_G_A	1_145644984_C_T	1	old	rs12405132	0.93(0.86-1.01)	0.091	0.94(0.91-0.96)	2.9e-08	0.97(0.95-0.99)	0.002	5.6e-10	6.88e-10	---
chr1	145661313	145661313	rs12725120	1_145661313_C_T	1_145644984_C_T	1	old	rs12405132	0.93(0.86-1.01)	0.091	0.94(0.91-0.96)	2.9e-08	0.97(0.95-0.99)	0.002	5.6e-10	8.45e-10	---
chr1	145662666	145662666	rs2318299	1_145662666_T_C	1_145644984_C_T	1	old	rs12405132	0.93(0.86-1.01)	0.091	0.94(0.91-0.96)	2.9e-08	0.97(0.95-0.99)	0.002	5.6e-10	8.26e-10	---
chr1	145662853	145662853	rs718942	1_145662853_T_A	1_145644984_C_T	1	old	rs12405132	0.93(0.86-1.01)	0.091	0.94(0.91-0.96)	2.9e-08	0.97(0.95-0.99)	0.002	5.6e-10	8.47e-10	---
chr1	145666719	145666719	rs34958017	1_145666719_G_A	1_145644984_C_T	1	old	rs12405132	0.93(0.86-1.01)	0.091	0.94(0.91-0.96)	2.9e-08	0.97(0.95-0.99)	0.002	5.6e-10	5.13e-10	---
chr1	145667088	145667088	rs12728500	1_145667088_C_A	1_145644984_C_T	1	old	rs12405132	0.93(0.86-1.01)	0.091	0.94(0.91-0.96)	2.9e-08	0.97(0.95-0.99)	0.002	5.6e-10	7.41e-10	---
chr1	145670568	145670568	rs143207801	1_145670568_C_A	1_145644984_C_T	1	old	rs12405132	0.93(0.86-1.01)	0.091	0.94(0.91-0.96)	2.9e-08	0.97(0.95-0.99)	0.002	5.6e-10	6.41e-10	---
chr1	145671455	145671455	rs1680663	1_145671455_C_G	1_145644984_C_T	1	old	rs12405132	0.93(0.86-1.01)	0.091	0.94(0.91-0.96)	2.9e-08	0.97(0.95-0.99)	0.002	5.6e-10	5.78e-10	---
chr1	145674149	145674149	rs35687015	1_145674149_T_A	1_145644984_C_T	1	old	rs12405132	0.93(0.86-1.01)	0.091	0.94(0.91-0.96)	2.9e-08	0.97(0.95-0.99)	0.002	5.6e-10	4.64e-10	---
chr1	145675931	145675931	rs11591191	1_145675931_T_C	1_145644984_C_T	1	old	rs12405132	0.93(0.86-1.01)	0.091	0.94(0.91-0.96)	2.9e-08	0.97(0.95-0.99)	0.002	5.6e-10	6.7e-10	---
chr1	145677252	145677252	rs71584610	1_145677252_T_TCACA	1_145644984_C_T	1	old	rs12405132	0.93(0.86-1.01)	0.091	0.94(0.91-0.96)	2.9e-08	0.97(0.95-0.99)	0.002	5.6e-10	1.99e-09	---
chr1	145681484	145681484	rs12750384	1_145681484_T_C	1_145644984_C_T	1	old	rs12405132	0.93(0.86-1.01)	0.091	0.94(0.91-0.96)	2.9e-08	0.97(0.95-0.99)	0.002	5.6e-10	9.26e-10	---
chr1	145683334	145683334	rs34695381	1_145683334_G_C	1_145644984_C_T	1	old	rs12405132	0.93(0.86-1.01)	0.091	0.94(0.91-0.96)	2.9e-08	0.97(0.95-0.99)	0.002	5.6e-10	5.98e-10	---
chr1	145685866	145685866	rs374085714	1_145685866_TG_T	1_145644984_C_T	1	old	rs12405132	0.93(0.86-1.01)	0.091	0.94(0.91-0.96)	2.9e-08	0.97(0.95-0.99)	0.002	5.6e-10	2.94e-09	---
chr1	149892872	149892872	rs11205277	1_149892872_A_G	1_149927034_A_C	1	old	rs12048493	1.02(0.94-1.12)	0.62	1.08(1.06-1.11)	9.5e-11	1.04(1.02-1.07)	5.1e-05	3.4e-13	3.95e-14	+++
chr1	149906413	149906413	rs11205303	1_149906413_T_C	1_149927034_A_C	1	old	rs12048493	1.02(0.94-1.12)	0.62	1.08(1.06-1.11)	9.5e-11	1.04(1.02-1.07)	5.1e-05	3.4e-13	1.14e-14	+++
chr1	149927034	149927034	rs12048493	1_149927034_A_C	1_149927034_A_C	1	old	rs12048493	1.02(0.94-1.12)	0.62	1.08(1.06-1.11)	9.5e-11	1.04(1.02-1.07)	5.1e-05	3.4e-13	8.62e-14	+++
chr1	149995265	149995265	rs67807996	1_149995265_G_A	1_149927034_A_C	1	old	rs12048493	1.02(0.94-1.12)	0.62	1.08(1.06-1.11)	9.5e-11	1.04(1.02-1.07)	5.1e-05	3.4e-13	7.36e-14	+++
chr1	155143768	155143768	rs4971091	1_155143768_G_T	1_155148781_G_A	1	new	rs4971059	1.1(1.03-1.17)	0.0042	1.03(1.01-1.06)	0.005	1.06(1.04-1.09)	3.7e-09	1.3e-11	3.48e-09	+++
chr1	155144300	155144300	rs4971093	1_155144300_G_A	1_155148781_G_A	1	new	rs4971059	1.1(1.03-1.17)	0.0042	1.03(1.01-1.06)	0.005	1.06(1.04-1.09)	3.7e-09	1.3e-11	3.83e-09	+++
chr1	155148781	155148781	rs4971059	1_155148781_G_A	1_155148781_G_A	1	new	rs4971059	1.1(1.03-1.17)	0.0042	1.03(1.01-1.06)	0.005	1.06(1.04-1.09)	3.7e-09	1.3e-11	4.83e-11	+++
chr1	155149718	155149718	rs3814316	1_155149718_G_A	1_155148781_G_A	1	new	rs4971059	1.1(1.03-1.17)	0.0042	1.03(1.01-1.06)	0.005	1.06(1.04-1.09)	3.7e-09	1.3e-11	2.59e-10	+++
chr1	155151493	155151493	rs11264341	1_155151493_C_T	1_155148781_G_A	1	new	rs4971059	1.1(1.03-1.17)	0.0042	1.03(1.01-1.06)	0.005	1.06(1.04-1.09)	3.7e-09	1.3e-11	1.2e-09	+++
chr1	155151754	155151754	rs9426886	1_155151754_A_T	1_155148781_G_A	1	new	rs4971059	1.1(1.03-1.17)	0.0042	1.03(1.01-1.06)	0.005	1.06(1.04-1.09)	3.7e-09	1.3e-11	1.22e-09	+++
chr1	155155608	155155608	rs4971099	1_155155608_A_G	1_155148781_G_A	1	new	rs4971059	1.1(1.03-1.17)	0.0042	1.03(1.01-1.06)	0.005	1.06(1.04-1.09)	3.7e-09	1.3e-11	1.83e-09	+++
chr1	155155731	155155731	rs4971100	1_155155731_G_A	1_155148781_G_A	1	new	rs4971059	1.1(1.03-1.17)	0.0042	1.03(1.01-1.06)	0.005	1.06(1.04-1.09)	3.7e-09	1.3e-11	1.65e-09	+++
chr1	155157635	155157635	rs4971101	1_155157635_G_A	1_155148781_G_A	1	new	rs4971059	1.1(1.03-1.17)	0.0042	1.03(1.01-1.06)	0.005	1.06(1.04-1.09)	3.7e-09	1.3e-11	2.36e-09	+++
chr1	155157715	155157715	rs2070803	1_155157715_A_G	1_155148781_G_A	1	new	rs4971059	1.1(1.03-1.17)	0.0042	1.03(1.01-1.06)	0.005	1.06(1.04-1.09)	3.7e-09	1.3e-11	2.56e-09	+++
chr1	155168930	155168930	rs7366775	1_155168930_G_A	1_155148781_G_A	1	new	rs4971059	1.1(1.03-1.17)	0.0042	1.03(1.01-1.06)	0.005	1.06(1.04-1.09)	3.7e-09	1.3e-11	2.04e-09	+++
chr1	155169355	155169355	rs423144	1_155169355_G_T	1_155148781_G_A	1	new	rs4971059	1.1(1.03-1.17)	0.0042	1.03(1.01-1.06)	0.005	1.06(1.04-1.09)	3.7e-09	1.3e-11	1.45e-09	+++
chr1	155174106	155174106	rs2075571	1_155174106_C_T	1_155148781_G_A	1	new	rs4971059	1.1(1.03-1.17)	0.0042	1.03(1.01-1.06)	0.005	1.06(1.04-1.09)	3.7e-09	1.3e-11	1.19e-09	+++
chr1	155184057	155184057	rs114312440	1_155184057_G_A	1_155148781_G_A	1	new	rs4971059	1.1(1.03-1.17)	0.0042	1.03(1.01-1.06)	0.005	1.06(1.04-1.09)	3.7e-09	1.3e-11	4.26e-09	+++
chr1	155186742	155186742	rs1057941	1_155186742_G_A	1_155148781_G_A	1	new	rs4971059	1.1(1.03-1.17)	0.0042	1.03(1.01-1.06)	0.005	1.06(1.04-1.09)	3.7e-09	1.3e-11	6.57e-10	+++
chr1	155198347	155198347	rs138507724	1_155198347_AAAAAT_A	1_155148781_G_A	1	new	rs4971059	1.1(1.03-1.17)	0.0042	1.03(1.01-1.06)	0.005	1.06(1.04-1.09)	3.7e-09	1.3e-11	5.21e-11	+++
chr1	155268425	155268425	rs12741350	1_155268425_C_T	1_155148781_G_A	1	new	rs4971059	1.1(1.03-1.17)	0.0042	1.03(1.01-1.06)	0.005	1.06(1.04-1.09)	3.7e-09	1.3e-11	4.54e-09	+++
chr1	155268958	155268958	rs11264357	1_155268958_C_T	1_155148781_G_A	1	new	rs4971059	1.1(1.03-1.17)	0.0042	1.03(1.01-1.06)	0.005	1.06(1.04-1.09)	3.7e-09	1.3e-11	3.97e-09	+++
chr1	155269776	155269776	rs3020781	1_155269776_A_G	1_155148781_G_A	1	new	rs4971059	1.1(1.03-1.17)	0.0042	1.03(1.01-1.06)	0.005	1.06(1.04-1.09)	3.7e-09	1.3e-11	3.48e-09	+++
chr1	155272274	155272274	rs7524950	1_155272274_C_T	1_155148781_G_A	1	new	rs4971059	1.1(1.03-1.17)	0.0042	1.03(1.01-1.06)	0.005	1.06(1.04-1.09)	3.7e-09	1.3e-11	3.35e-09	+++
chr1	155275727	155275727	rs10908461	1_155275727_C_T	1_155148781_G_A	1	new	rs4971059	1.1(1.03-1.17)	0.0042	1.03(1.01-1.06)	0.005	1.06(1.04-1.09)	3.7e-09	1.3e-11	4.54e-09	+++
chr1	155416328	155416328	rs10796944	1_155416328_G_A	1_155148781_G_A	1	new	rs4971059	1.1(1.03-1.17)	0.0042	1.03(1.01-1.06)	0.005	1.06(1.04-1.09)	3.7e-09	1.3e-11	6.63e-10	+++
chr1	155556971	155556971	rs12091730	1_155556971_G_A	1_155148781_G_A	1	new	rs4971059	1.1(1.03-1.17)	0.0042	1.03(1.01-1.06)	0.005	1.06(1.04-1.09)	3.7e-09	1.3e-11	2.31e-10	+++
chr1	201437832	201437832	rs35383942	1_201437832_C_T	1_201437832_C_T	1	new	rs35383942	1.15(0.99-1.34)	0.07	1.08(1.03-1.14)	0.0026	1.10(1.05-1.15)	1e-05	2.3e-08	3.79e-13	+++
chr1	217200580	217200580	rs11572421	1_217200580_C_T	1_217220574_G_A	1	new	rs11117758	0.97(0.9-1.05)	0.5	0.96(0.94-0.99)	0.0063	0.94(0.92-0.96)	9.7e-07	4.1e-08	1.62e-08	---
chr1	217200883	217200883	rs2377360	1_217200883_G_A	1_217220574_G_A	1	new	rs11117758	0.97(0.9-1.05)	0.5	0.96(0.94-0.99)	0.0063	0.94(0.92-0.96)	9.7e-07	4.1e-08	1.78e-07	+++
chr1	217202672	217202672	rs12075072	1_217202672_T_C	1_217220574_G_A	1	new	rs11117758	0.97(0.9-1.05)	0.5	0.96(0.94-0.99)	0.0063	0.94(0.92-0.96)	9.7e-07	4.1e-08	8.26e-09	---
chr1	217205426	217205426	rs4846805	1_217205426_T_C	1_217220574_G_A	1	new	rs11117758	0.97(0.9-1.05)	0.5	0.96(0.94-0.99)	0.0063	0.94(0.92-0.96)	9.7e-07	4.1e-08	7.73e-09	---
chr1	217206705	217206705	rs11117754	1_217206705_T_G	1_217220574_G_A	1	new	rs11117758	0.97(0.9-1.05)	0.5	0.96(0.94-0.99)	0.0063	0.94(0.92-0.96)	9.7e-07	4.1e-08	7.59e-09	---
chr1	217209538	217209538	rs12141987	1_217209538_C_T	1_217220574_G_A	1	new	rs11117758	0.97(0.9-1.05)	0.5	0.96(0.94-0.99)	0.0063	0.94(0.92-0.96)	9.7e-07	4.1e-08	6.61e-09	---
chr1	217209735	217209735	rs12142044	1_217209735_C_A	1_217220574_G_A	1	new	rs11117758	0.97(0.9-1.05)	0.5	0.96(0.94-0.99)	0.0063	0.94(0.92-0.96)	9.7e-07	4.1e-08	6.14e-09	---
chr1	217215465	217215465	rs4360582	1_217215465_T_C	1_217220574_G_A	1	new	rs11117758	0.97(0.9-1.05)	0.5	0.96(0.94-0.99)	0.0063	0.94(0.92-0.96)	9.7e-07	4.1e-08	8.49e-09	---
chr1	217217305	217217305	rs17687992	1_217217305_T_G	1_217220574_G_A	1	new	rs11117758	0.97(0.9-1.05)	0.5	0.96(0.94-0.99)	0.0063	0.94(0.92-0.96)	9.7e-07	4.1e-08	4.57e-09	---
chr1	217220574	217220574	rs11117758	1_217220574_G_A	1_217220574_G_A	1	new	rs11117758	0.97(0.9-1.05)	0.5	0.96(0.94-0.99)	0.0063	0.94(0.92-0.96)	9.7e-07	4.1e-08	3.9e-09	---
chr1	217222804	217222804	rs10863291	1_217222804_T_A	1_217220574_G_A	1	new	rs11117758	0.97(0.9-1.05)	0.5	0.96(0.94-0.99)	0.0063	0.94(0.92-0.96)	9.7e-07	4.1e-08	1.12e-08	---
chr1	242023898	242023898	rs4149909	1_242023898_A_G	1_242034263_A_G	1	old	rs72755295	1.06(0.8-1.4)	0.69	1.16(1.09-1.23)	3.3e-06	1.16(1.1-1.23)	6.2e-08	1.1e-12	2.93e-14	+++
chr1	242034263	242034263	rs72755295	1_242034263_A_G	1_242034263_A_G	1	old	rs72755295	1.06(0.8-1.4)	0.69	1.16(1.09-1.23)	3.3e-06	1.16(1.1-1.23)	6.2e-08	1.1e-12	1.65e-14	+++
chr2	10088691	10088691	rs138963533	2_10088691_T_TG	2_10135681_C_G	2	new	rs113577745	1.04(0.93-1.15)	0.51	1.05(1.01-1.09)	0.0061	1.08(1.04-1.1)	1.4e-05	3.4e-07	2.6e-08	+++
chr2	10135681	10135681	rs113577745	2_10135681_C_G	2_10135681_C_G	2	new	rs113577745	1.04(0.93-1.15)	0.51	1.05(1.01-1.09)	0.0061	1.08(1.04-1.1)	1.4e-05	3.4e-07	3.91e-10	+++
chr2	10138585	10138585	2:10138585	2_10138585_T_C	2_10135681_C_G	2	new	rs113577745	1.04(0.93-1.15)	0.51	1.05(1.01-1.09)	0.0061	1.08(1.04-1.1)	1.4e-05	3.4e-07	4.27e-10	+++
chr2	10138607	10138607	2:10138607	2_10138607_T_C	2_10135681_C_G	2	new	rs113577745	1.04(0.93-1.15)	0.51	1.05(1.01-1.09)	0.0061	1.08(1.04-1.1)	1.4e-05	3.4e-07	4.69e-10	+++
chr2	10138649	10138649	2:10138649	2_10138649_T_C	2_10135681_C_G	2	new	rs113577745	1.04(0.93-1.15)	0.51	1.05(1.01-1.09)	0.0061	1.08(1.04-1.1)	1.4e-05	3.4e-07	6.19e-10	+++
chr2	10138673	10138673	2:10138673	2_10138673_T_C	2_10135681_C_G	2	new	rs113577745	1.04(0.93-1.15)	0.51	1.05(1.01-1.09)	0.0061	1.08(1.04-1.1)	1.4e-05	3.4e-07	1.15e-09	+++
chr2	10138860	10138860	rs200476397	2_10138860_G_GTA	2_10135681_C_G	2	new	rs113577745	1.04(0.93-1.15)	0.51	1.05(1.01-1.09)	0.0061	1.08(1.04-1.1)	1.4e-05	3.4e-07	1.31e-09	+++
chr2	10138983	10138983	rs78425380	2_10138983_T_C	2_10135681_C_G	2	new	rs113577745	1.04(0.93-1.15)	0.51	1.05(1.01-1.09)	0.0061	1.08(1.04-1.1)	1.4e-05	3.4e-07	1.03e-09	+++
chr2	10144973	10144973	rs73913955	2_10144973_C_T	2_10135681_C_G	2	new	rs113577745	1.04(0.93-1.15)	0.51	1.05(1.01-1.09)	0.0061	1.08(1.04-1.1)	1.4e-05	3.4e-07	2.33e-08	+++
chr2	10145348	10145348	rs1469541	2_10145348_G_A	2_10135681_C_G	2	new	rs113577745	1.04(0.93-1.15)	0.51	1.05(1.01-1.09)	0.0061	1.08(1.04-1.1)	1.4e-05	3.4e-07	3.5e-08	+++
chr2	10146757	10146757	rs113967167	2_10146757_C_T	2_10135681_C_G	2	new	rs113577745	1.04(0.93-1.15)	0.51	1.05(1.01-1.09)	0.0061	1.08(1.04-1.1)	1.4e-05	3.4e-07	1.03e-08	+++
chr2	19302429	19302429	rs4283375	2_19302429_G_A	2_19320803_T_C	2	old	rs12710696	1.09(1.03-1.16)	0.0047	1.01(0.98-1.03)	0.53	1.01(0.99-1.04)	0.18	0.039	4.46e-11	---
chr2	19309911	19309911	rs10209121	2_19309911_C_T	2_19320803_T_C	2	old	rs12710696	1.09(1.03-1.16)	0.0047	1.01(0.98-1.03)	0.53	1.01(0.99-1.04)	0.18	0.039	1.64e-12	---
chr2	19310918	19310918	rs11684853	2_19310918_G_T	2_19320803_T_C	2	old	rs12710696	1.09(1.03-1.16)	0.0047	1.01(0.98-1.03)	0.53	1.01(0.99-1.04)	0.18	0.039	1.12e-12	---
chr2	19311124	19311124	rs11675359	2_19311124_C_G	2_19320803_T_C	2	old	rs12710696	1.09(1.03-1.16)	0.0047	1.01(0.98-1.03)	0.53	1.01(0.99-1.04)	0.18	0.039	1.04e-11	---
chr2	19311718	19311718	rs12710695	2_19311718_C_T	2_19320803_T_C	2	old	rs12710696	1.09(1.03-1.16)	0.0047	1.01(0.98-1.03)	0.53	1.01(0.99-1.04)	0.18	0.039	8.95e-12	---
chr2	19315675	19315675	rs6743383	2_19315675_T_A	2_19320803_T_C	2	old	rs12710696	1.09(1.03-1.16)	0.0047	1.01(0.98-1.03)	0.53	1.01(0.99-1.04)	0.18	0.039	1.37e-12	---
chr2	19315791	19315791	rs12165206	2_19315791_A_G	2_19320803_T_C	2	old	rs12710696	1.09(1.03-1.16)	0.0047	1.01(0.98-1.03)	0.53	1.01(0.99-1.04)	0.18	0.039	1.71e-12	---
chr2	19316059	19316059	rs10184522	2_19316059_C_A	2_19320803_T_C	2	old	rs12710696	1.09(1.03-1.16)	0.0047	1.01(0.98-1.03)	0.53	1.01(0.99-1.04)	0.18	0.039	1.7e-12	---
chr2	19318805	19318805	rs11365063	2_19318805_GT_G	2_19320803_T_C	2	old	rs12710696	1.09(1.03-1.16)	0.0047	1.01(0.98-1.03)	0.53	1.01(0.99-1.04)	0.18	0.039	1.25e-11	---
chr2	19319060	19319060	rs6747315	2_19319060_G_A	2_19320803_T_C	2	old	rs12710696	1.09(1.03-1.16)	0.0047	1.01(0.98-1.03)	0.53	1.01(0.99-1.04)	0.18	0.039	2.16e-12	---
chr2	19319834	19319834	rs4322801	2_19319834_A_G	2_19320803_T_C	2	old	rs12710696	1.09(1.03-1.16)	0.0047	1.01(0.98-1.03)	0.53	1.01(0.99-1.04)	0.18	0.039	2.51e-12	---
chr2	19319977	19319977	rs4425044	2_19319977_G_A	2_19320803_T_C	2	old	rs12710696	1.09(1.03-1.16)	0.0047	1.01(0.98-1.03)	0.53	1.01(0.99-1.04)	0.18	0.039	2.94e-12	---
chr2	19320968	19320968	rs12710697	2_19320968_C_T	2_19320803_T_C	2	old	rs12710696	1.09(1.03-1.16)	0.0047	1.01(0.98-1.03)	0.53	1.01(0.99-1.04)	0.18	0.039	2.61e-12	---
chr2	19321500	19321500	rs10206829	2_19321500_G_A	2_19320803_T_C	2	old	rs12710696	1.09(1.03-1.16)	0.0047	1.01(0.98-1.03)	0.53	1.01(0.99-1.04)	0.18	0.039	2.23e-12	---
chr2	19323073	19323073	rs4358083	2_19323073_A_C	2_19320803_T_C	2	old	rs12710696	1.09(1.03-1.16)	0.0047	1.01(0.98-1.03)	0.53	1.01(0.99-1.04)	0.18	0.039	1.04e-11	---
chr2	19324049	19324049	rs4233763	2_19324049_G_A	2_19320803_T_C	2	old	rs12710696	1.09(1.03-1.16)	0.0047	1.01(0.98-1.03)	0.53	1.01(0.99-1.04)	0.18	0.039	1.3e-11	---
chr2	19324055	19324055	rs4233764	2_19324055_A_G	2_19320803_T_C	2	old	rs12710696	1.09(1.03-1.16)	0.0047	1.01(0.98-1.03)	0.53	1.01(0.99-1.04)	0.18	0.039	1.24e-11	---
chr2	25083310	25083310	rs7576788	2_25083310_T_C	2_25129473_A_G	2	new	rs6725517	0.98(0.92-1.04)	0.52	0.95(0.93-0.98)	0.00046	0.97(0.95-0.99)	0.00074	1.6e-06	1.97e-10	---
chr2	25085268	25085268	rs2384055	2_25085268_T_A	2_25129473_A_G	2	new	rs6725517	0.98(0.92-1.04)	0.52	0.95(0.93-0.98)	0.00046	0.97(0.95-0.99)	0.00074	1.6e-06	2.39e-10	---
chr2	25086827	25086827	rs1529897	2_25086827_T_G	2_25129473_A_G	2	new	rs6725517	0.98(0.92-1.04)	0.52	0.95(0.93-0.98)	0.00046	0.97(0.95-0.99)	0.00074	1.6e-06	2.08e-10	---
chr2	25089594	25089594	rs35177510	2_25089594_C_A	2_25129473_A_G	2	new	rs6725517	0.98(0.92-1.04)	0.52	0.95(0.93-0.98)	0.00046	0.97(0.95-0.99)	0.00074	1.6e-06	2.21e-10	---
chr2	25091721	25091721	rs35609705	2_25091721_T_TA	2_25129473_A_G	2	new	rs6725517	0.98(0.92-1.04)	0.52	0.95(0.93-0.98)	0.00046	0.97(0.95-0.99)	0.00074	1.6e-06	2.25e-10	---
chr2	25093151	25093151	rs13019149	2_25093151_C_T	2_25129473_A_G	2	new	rs6725517	0.98(0.92-1.04)	0.52	0.95(0.93-0.98)	0.00046	0.97(0.95-0.99)	0.00074	1.6e-06	1.76e-10	---
chr2	25100167	25100167	rs2384057	2_25100167_C_G	2_25129473_A_G	2	new	rs6725517	0.98(0.92-1.04)	0.52	0.95(0.93-0.98)	0.00046	0.97(0.95-0.99)	0.00074	1.6e-06	1.63e-10	---
chr2	25100738	25100738	rs10865315	2_25100738_C_A	2_25129473_A_G	2	new	rs6725517	0.98(0.92-1.04)	0.52	0.95(0.93-0.98)	0.00046	0.97(0.95-0.99)	0.00074	1.6e-06	1.62e-10	---
chr2	25101092	25101092	rs2033655	2_25101092_G_A	2_25129473_A_G	2	new	rs6725517	0.98(0.92-1.04)	0.52	0.95(0.93-0.98)	0.00046	0.97(0.95-0.99)	0.00074	1.6e-06	1.5e-10	---
chr2	25103967	25103967	rs7591460	2_25103967_A_C	2_25129473_A_G	2	new	rs6725517	0.98(0.92-1.04)	0.52	0.95(0.93-0.98)	0.00046	0.97(0.95-0.99)	0.00074	1.6e-06	7.78e-11	---
chr2	25104679	25104679	rs3037312	2_25104679_AGT_A	2_25129473_A_G	2	new	rs6725517	0.98(0.92-1.04)	0.52	0.95(0.93-0.98)	0.00046	0.97(0.95-0.99)	0.00074	1.6e-06	2.01e-10	---
chr2	25105921	25105921	rs35803386	2_25105921_C_T	2_25129473_A_G	2	new	rs6725517	0.98(0.92-1.04)	0.52	0.95(0.93-0.98)	0.00046	0.97(0.95-0.99)	0.00074	1.6e-06	1.04e-10	---
chr2	25107589	25107589	rs11675198	2_25107589_G_C	2_25129473_A_G	2	new	rs6725517	0.98(0.92-1.04)	0.52	0.95(0.93-0.98)	0.00046	0.97(0.95-0.99)	0.00074	1.6e-06	8.77e-11	---
chr2	25107712	25107712	rs36007978	2_25107712_CT_C	2_25129473_A_G	2	new	rs6725517	0.98(0.92-1.04)	0.52	0.95(0.93-0.98)	0.00046	0.97(0.95-0.99)	0.00074	1.6e-06	1.86e-10	---
chr2	25107759	25107759	rs11686663	2_25107759_C_T	2_25129473_A_G	2	new	rs6725517	0.98(0.92-1.04)	0.52	0.95(0.93-0.98)	0.00046	0.97(0.95-0.99)	0.00074	1.6e-06	9.58e-11	---
chr2	25108197	25108197	rs1865689	2_25108197_T_C	2_25129473_A_G	2	new	rs6725517	0.98(0.92-1.04)	0.52	0.95(0.93-0.98)	0.00046	0.97(0.95-0.99)	0.00074	1.6e-06	6.27e-11	---
chr2	25109317	25109317	rs7605335	2_25109317_G_A	2_25129473_A_G	2	new	rs6725517	0.98(0.92-1.04)	0.52	0.95(0.93-0.98)	0.00046	0.97(0.95-0.99)	0.00074	1.6e-06	1.3e-10	---
chr2	25122840	25122840	rs4077678	2_25122840_C_G	2_25129473_A_G	2	new	rs6725517	0.98(0.92-1.04)	0.52	0.95(0.93-0.98)	0.00046	0.97(0.95-0.99)	0.00074	1.6e-06	2.5e-10	---
chr2	25125075	25125075	rs7563204	2_25125075_T_G	2_25129473_A_G	2	new	rs6725517	0.98(0.92-1.04)	0.52	0.95(0.93-0.98)	0.00046	0.97(0.95-0.99)	0.00074	1.6e-06	2.83e-10	---
chr2	25126230	25126230	rs6712981	2_25126230_A_G	2_25129473_A_G	2	new	rs6725517	0.98(0.92-1.04)	0.52	0.95(0.93-0.98)	0.00046	0.97(0.95-0.99)	0.00074	1.6e-06	2.83e-10	---
chr2	25126328	25126328	rs6726199	2_25126328_G_C	2_25129473_A_G	2	new	rs6725517	0.98(0.92-1.04)	0.52	0.95(0.93-0.98)	0.00046	0.97(0.95-0.99)	0.00074	1.6e-06	2.2e-10	---
chr2	25126715	25126715	rs6545809	2_25126715_C_T	2_25129473_A_G	2	new	rs6725517	0.98(0.92-1.04)	0.52	0.95(0.93-0.98)	0.00046	0.97(0.95-0.99)	0.00074	1.6e-06	1.87e-10	---
chr2	25127006	25127006	rs10566562	2_25127006_CAGAG_C	2_25129473_A_G	2	new	rs6725517	0.98(0.92-1.04)	0.52	0.95(0.93-0.98)	0.00046	0.97(0.95-0.99)	0.00074	1.6e-06	1.53e-11	---
chr2	25127394	25127394	rs34697209	2_25127394_A_G	2_25129473_A_G	2	new	rs6725517	0.98(0.92-1.04)	0.52	0.95(0.93-0.98)	0.00046	0.97(0.95-0.99)	0.00074	1.6e-06	4.64e-12	---
chr2	25127614	25127614	rs6717671	2_25127614_A_G	2_25129473_A_G	2	new	rs6725517	0.98(0.92-1.04)	0.52	0.95(0.93-0.98)	0.00046	0.97(0.95-0.99)	0.00074	1.6e-06	2.01e-10	---
chr2	25128351	25128351	rs6706316	2_25128351_C_G	2_25129473_A_G	2	new	rs6725517	0.98(0.92-1.04)	0.52	0.95(0.93-0.98)	0.00046	0.97(0.95-0.99)	0.00074	1.6e-06	2.01e-10	---
chr2	25128719	25128719	rs6721750	2_25128719_A_G	2_25129473_A_G	2	new	rs6725517	0.98(0.92-1.04)	0.52	0.95(0.93-0.98)	0.00046	0.97(0.95-0.99)	0.00074	1.6e-06	1.57e-10	---
chr2	25128730	25128730	rs6724772	2_25128730_T_C	2_25129473_A_G	2	new	rs6725517	0.98(0.92-1.04)	0.52	0.95(0.93-0.98)	0.00046	0.97(0.95-0.99)	0.00074	1.6e-06	1.57e-10	---
chr2	25129166	25129166	rs10651478	2_25129166_A_ACT	2_25129473_A_G	2	new	rs6725517	0.98(0.92-1.04)	0.52	0.95(0.93-0.98)	0.00046	0.97(0.95-0.99)	0.00074	1.6e-06	2.3e-10	---
chr2	25129473	25129473	rs6725517	2_25129473_A_G	2_25129473_A_G	2	new	rs6725517	0.98(0.92-1.04)	0.52	0.95(0.93-0.98)	0.00046	0.97(0.95-0.99)	0.00074	1.6e-06	2.93e-12	---
chr2	25129787	25129787	rs7576172	2_25129787_A_G	2_25129473_A_G	2	new	rs6725517	0.98(0.92-1.04)	0.52	0.95(0.93-0.98)	0.00046	0.97(0.95-0.99)	0.00074	1.6e-06	1.09e-10	---
chr2	25130073	25130073	rs7565460	2_25130073_C_T	2_25129473_A_G	2	new	rs6725517	0.98(0.92-1.04)	0.52	0.95(0.93-0.98)	0.00046	0.97(0.95-0.99)	0.00074	1.6e-06	1.25e-10	---
chr2	25130440	25130440	rs11689543	2_25130440_A_T	2_25129473_A_G	2	new	rs6725517	0.98(0.92-1.04)	0.52	0.95(0.93-0.98)	0.00046	0.97(0.95-0.99)	0.00074	1.6e-06	1.29e-10	---
chr2	25130451	25130451	rs11689546	2_25130451_A_G	2_25129473_A_G	2	new	rs6725517	0.98(0.92-1.04)	0.52	0.95(0.93-0.98)	0.00046	0.97(0.95-0.99)	0.00074	1.6e-06	1.52e-10	---
chr2	25130462	25130462	rs10200566	2_25130462_T_G	2_25129473_A_G	2	new	rs6725517	0.98(0.92-1.04)	0.52	0.95(0.93-0.98)	0.00046	0.97(0.95-0.99)	0.00074	1.6e-06	1.22e-10	---
chr2	25130592	25130592	rs10198356	2_25130592_A_G	2_25129473_A_G	2	new	rs6725517	0.98(0.92-1.04)	0.52	0.95(0.93-0.98)	0.00046	0.97(0.95-0.99)	0.00074	1.6e-06	1.25e-10	---
chr2	25130684	25130684	rs10186242	2_25130684_C_T	2_25129473_A_G	2	new	rs6725517	0.98(0.92-1.04)	0.52	0.95(0.93-0.98)	0.00046	0.97(0.95-0.99)	0.00074	1.6e-06	1.25e-10	---
chr2	25130907	25130907	rs6733224	2_25130907_T_C	2_25129473_A_G	2	new	rs6725517	0.98(0.92-1.04)	0.52	0.95(0.93-0.98)	0.00046	0.97(0.95-0.99)	0.00074	1.6e-06	1.44e-10	---
chr2	25130920	25130920	rs6730191	2_25130920_A_G	2_25129473_A_G	2	new	rs6725517	0.98(0.92-1.04)	0.52	0.95(0.93-0.98)	0.00046	0.97(0.95-0.99)	0.00074	1.6e-06	1.56e-10	---
chr2	25131161	25131161	rs6736210	2_25131161_T_C	2_25129473_A_G	2	new	rs6725517	0.98(0.92-1.04)	0.52	0.95(0.93-0.98)	0.00046	0.97(0.95-0.99)	0.00074	1.6e-06	2.91e-10	---
chr2	25131170	25131170	rs6718628	2_25131170_C_G	2_25129473_A_G	2	new	rs6725517	0.98(0.92-1.04)	0.52	0.95(0.93-0.98)	0.00046	0.97(0.95-0.99)	0.00074	1.6e-06	2.92e-10	---
chr2	25131287	25131287	rs6545813	2_25131287_C_T	2_25129473_A_G	2	new	rs6725517	0.98(0.92-1.04)	0.52	0.95(0.93-0.98)	0.00046	0.97(0.95-0.99)	0.00074	1.6e-06	2.85e-10	---
chr2	25131316	25131316	rs6545814	2_25131316_A_G	2_25129473_A_G	2	new	rs6725517	0.98(0.92-1.04)	0.52	0.95(0.93-0.98)	0.00046	0.97(0.95-0.99)	0.00074	1.6e-06	2.87e-10	---
chr2	25131986	25131986	rs11900505	2_25131986_A_C	2_25129473_A_G	2	new	rs6725517	0.98(0.92-1.04)	0.52	0.95(0.93-0.98)	0.00046	0.97(0.95-0.99)	0.00074	1.6e-06	2.28e-10	---
chr2	25132192	25132192	rs6722587	2_25132192_C_A	2_25129473_A_G	2	new	rs6725517	0.98(0.92-1.04)	0.52	0.95(0.93-0.98)	0.00046	0.97(0.95-0.99)	0.00074	1.6e-06	2.71e-10	---
chr2	25133148	25133148	rs6744205	2_25133148_T_C	2_25129473_A_G	2	new	rs6725517	0.98(0.92-1.04)	0.52	0.95(0.93-0.98)	0.00046	0.97(0.95-0.99)	0.00074	1.6e-06	2.32e-10	---
chr2	25133530	25133530	rs59644324	2_25133530_CTT_C	2_25129473_A_G	2	new	rs6725517	0.98(0.92-1.04)	0.52	0.95(0.93-0.98)	0.00046	0.97(0.95-0.99)	0.00074	1.6e-06	2.93e-11	---
chr2	25133750	25133750	rs6754997	2_25133750_G_A	2_25129473_A_G	2	new	rs6725517	0.98(0.92-1.04)	0.52	0.95(0.93-0.98)	0.00046	0.97(0.95-0.99)	0.00074	1.6e-06	2.44e-10	---
chr2	25134009	25134009	rs13035244	2_25134009_T_C	2_25129473_A_G	2	new	rs6725517	0.98(0.92-1.04)	0.52	0.95(0.93-0.98)	0.00046	0.97(0.95-0.99)	0.00074	1.6e-06	2.56e-10	---
chr2	25134344	25134344	rs13003430	2_25134344_T_C	2_25129473_A_G	2	new	rs6725517	0.98(0.92-1.04)	0.52	0.95(0.93-0.98)	0.00046	0.97(0.95-0.99)	0.00074	1.6e-06	2.35e-10	---
chr2	25134497	25134497	rs12713422	2_25134497_A_C	2_25129473_A_G	2	new	rs6725517	0.98(0.92-1.04)	0.52	0.95(0.93-0.98)	0.00046	0.97(0.95-0.99)	0.00074	1.6e-06	2.85e-10	---
chr2	25135620	25135620	rs2384061	2_25135620_G_A	2_25129473_A_G	2	new	rs6725517	0.98(0.92-1.04)	0.52	0.95(0.93-0.98)	0.00046	0.97(0.95-0.99)	0.00074	1.6e-06	1.02e-11	---
chr2	25136866	25136866	rs10203386	2_25136866_T_A	2_25129473_A_G	2	new	rs6725517	0.98(0.92-1.04)	0.52	0.95(0.93-0.98)	0.00046	0.97(0.95-0.99)	0.00074	1.6e-06	1.03e-10	---
chr2	25137323	25137323	rs10206196	2_25137323_T_C	2_25129473_A_G	2	new	rs6725517	0.98(0.92-1.04)	0.52	0.95(0.93-0.98)	0.00046	0.97(0.95-0.99)	0.00074	1.6e-06	1.04e-10	---
chr2	111868604	111868604	rs73954922	2_111868604_A_C	2_111925731_CTTATGTT_C	2	new	rs71801447	1.02(0.9-1.16)	0.76	1.08(1.03-1.13)	0.0021	1.09(1.05-1.13)	4.8e-05	5.4e-07	1.58e-07	+++
chr2	111870220	111870220	rs2289321	2_111870220_T_C	2_111925731_CTTATGTT_C	2	new	rs71801447	1.02(0.9-1.16)	0.76	1.08(1.03-1.13)	0.0021	1.09(1.05-1.13)	4.8e-05	5.4e-07	2.67e-07	+++
chr2	111874194	111874194	rs372260105	2_111874194_ATGT_A	2_111925731_CTTATGTT_C	2	new	rs71801447	1.02(0.9-1.16)	0.76	1.08(1.03-1.13)	0.0021	1.09(1.05-1.13)	4.8e-05	5.4e-07	1e-07	+++
chr2	111874394	111874394	rs3833442	2_111874394_TA_T	2_111925731_CTTATGTT_C	2	new	rs71801447	1.02(0.9-1.16)	0.76	1.08(1.03-1.13)	0.0021	1.09(1.05-1.13)	4.8e-05	5.4e-07	7.76e-08	+++
chr2	111877174	111877174	rs73954925	2_111877174_C_G	2_111925731_CTTATGTT_C	2	new	rs71801447	1.02(0.9-1.16)	0.76	1.08(1.03-1.13)	0.0021	1.09(1.05-1.13)	4.8e-05	5.4e-07	1.68e-07	+++
chr2	111877175	111877175	rs73954926	2_111877175_T_G	2_111925731_CTTATGTT_C	2	new	rs71801447	1.02(0.9-1.16)	0.76	1.08(1.03-1.13)	0.0021	1.09(1.05-1.13)	4.8e-05	5.4e-07	1.68e-07	+++
chr2	111877744	111877744	rs111736126	2_111877744_C_G	2_111925731_CTTATGTT_C	2	new	rs71801447	1.02(0.9-1.16)	0.76	1.08(1.03-1.13)	0.0021	1.09(1.05-1.13)	4.8e-05	5.4e-07	9.46e-07	+++
chr2	111881810	111881810	rs72948328	2_111881810_C_T	2_111925731_CTTATGTT_C	2	new	rs71801447	1.02(0.9-1.16)	0.76	1.08(1.03-1.13)	0.0021	1.09(1.05-1.13)	4.8e-05	5.4e-07	1.06e-07	+++
chr2	111890379	111890379	rs73954941	2_111890379_T_G	2_111925731_CTTATGTT_C	2	new	rs71801447	1.02(0.9-1.16)	0.76	1.08(1.03-1.13)	0.0021	1.09(1.05-1.13)	4.8e-05	5.4e-07	1.06e-07	+++
chr2	111890432	111890432	rs73954943	2_111890432_G_A	2_111925731_CTTATGTT_C	2	new	rs71801447	1.02(0.9-1.16)	0.76	1.08(1.03-1.13)	0.0021	1.09(1.05-1.13)	4.8e-05	5.4e-07	2.07e-07	+++
chr2	111894391	111894391	rs80130556	2_111894391_A_G	2_111925731_CTTATGTT_C	2	new	rs71801447	1.02(0.9-1.16)	0.76	1.08(1.03-1.13)	0.0021	1.09(1.05-1.13)	4.8e-05	5.4e-07	6.14e-07	+++
chr2	111894720	111894720	rs17041868	2_111894720_T_C	2_111925731_CTTATGTT_C	2	new	rs71801447	1.02(0.9-1.16)	0.76	1.08(1.03-1.13)	0.0021	1.09(1.05-1.13)	4.8e-05	5.4e-07	1.48e-07	+++
chr2	111897506	111897506	rs12613243	2_111897506_T_C	2_111925731_CTTATGTT_C	2	new	rs71801447	1.02(0.9-1.16)	0.76	1.08(1.03-1.13)	0.0021	1.09(1.05-1.13)	4.8e-05	5.4e-07	2.69e-07	+++
chr2	111898984	111898984	rs113050728	2_111898984_T_C	2_111925731_CTTATGTT_C	2	new	rs71801447	1.02(0.9-1.16)	0.76	1.08(1.03-1.13)	0.0021	1.09(1.05-1.13)	4.8e-05	5.4e-07	2.05e-07	+++
chr2	111899881	111899881	rs3761706	2_111899881_G_A	2_111925731_CTTATGTT_C	2	new	rs71801447	1.02(0.9-1.16)	0.76	1.08(1.03-1.13)	0.0021	1.09(1.05-1.13)	4.8e-05	5.4e-07	2.33e-07	+++
chr2	111900904	111900904	rs75543804	2_111900904_G_T	2_111925731_CTTATGTT_C	2	new	rs71801447	1.02(0.9-1.16)	0.76	1.08(1.03-1.13)	0.0021	1.09(1.05-1.13)	4.8e-05	5.4e-07	5.31e-07	+++
chr2	111910083	111910083	rs3789067	2_111910083_C_T	2_111925731_CTTATGTT_C	2	new	rs71801447	1.02(0.9-1.16)	0.76	1.08(1.03-1.13)	0.0021	1.09(1.05-1.13)	4.8e-05	5.4e-07	3.74e-07	+++
chr2	111910091	111910091	rs3789066	2_111910091_A_T	2_111925731_CTTATGTT_C	2	new	rs71801447	1.02(0.9-1.16)	0.76	1.08(1.03-1.13)	0.0021	1.09(1.05-1.13)	4.8e-05	5.4e-07	3.75e-07	+++
chr2	111925731	111925731	rs71801447	2_111925731_CTTATGTT_C	2_111925731_CTTATGTT_C	2	new	rs71801447	1.02(0.9-1.16)	0.76	1.08(1.03-1.13)	0.0021	1.09(1.05-1.13)	4.8e-05	5.4e-07	3.69e-08	+++
chr2	111928231	111928231	rs77704058	2_111928231_C_G	2_111925731_CTTATGTT_C	2	new	rs71801447	1.02(0.9-1.16)	0.76	1.08(1.03-1.13)	0.0021	1.09(1.05-1.13)	4.8e-05	5.4e-07	1.88e-06	+++
chr2	111929881	111929881	rs61484463	2_111929881_T_C	2_111925731_CTTATGTT_C	2	new	rs71801447	1.02(0.9-1.16)	0.76	1.08(1.03-1.13)	0.0021	1.09(1.05-1.13)	4.8e-05	5.4e-07	1.72e-06	+++
chr2	121238418	121238418	rs2310900	2_121238418_C_T	2_121245122_T_C	2	old	rs4849887	0.93(0.84-1.03)	0.16	0.91(0.88-0.95)	1.7e-06	0.92(0.89-0.96)	3e-06	1e-11	1.1e-19	+++
chr2	121238566	121238566	rs2310910	2_121238566_G_A	2_121245122_T_C	2	old	rs4849887	0.93(0.84-1.03)	0.16	0.91(0.88-0.95)	1.7e-06	0.92(0.89-0.96)	3e-06	1e-11	1.15e-19	+++
chr2	121238571	121238571	2:121238571	2_121238571_AGTGT_AGT	2_121245122_T_C	2	old	rs4849887	0.93(0.84-1.03)	0.16	0.91(0.88-0.95)	1.7e-06	0.92(0.89-0.96)	3e-06	1e-11	6.83e-20	+++
chr2	121239256	121239256	rs4849879	2_121239256_C_G	2_121245122_T_C	2	old	rs4849887	0.93(0.84-1.03)	0.16	0.91(0.88-0.95)	1.7e-06	0.92(0.89-0.96)	3e-06	1e-11	1.68e-20	+++
chr2	121239360	121239360	rs4848599	2_121239360_T_C	2_121245122_T_C	2	old	rs4849887	0.93(0.84-1.03)	0.16	0.91(0.88-0.95)	1.7e-06	0.92(0.89-0.96)	3e-06	1e-11	1.59e-20	+++
chr2	121240628	121240628	rs12466825	2_121240628_A_G	2_121245122_T_C	2	old	rs4849887	0.93(0.84-1.03)	0.16	0.91(0.88-0.95)	1.7e-06	0.92(0.89-0.96)	3e-06	1e-11	5.23e-19	+++
chr2	121240837	121240837	rs12711944	2_121240837_C_T	2_121245122_T_C	2	old	rs4849887	0.93(0.84-1.03)	0.16	0.91(0.88-0.95)	1.7e-06	0.92(0.89-0.96)	3e-06	1e-11	8.14e-20	+++
chr2	121241176	121241176	rs4849880	2_121241176_T_C	2_121245122_T_C	2	old	rs4849887	0.93(0.84-1.03)	0.16	0.91(0.88-0.95)	1.7e-06	0.92(0.89-0.96)	3e-06	1e-11	8.65e-20	+++
chr2	121241907	121241907	rs1534100	2_121241907_A_G	2_121245122_T_C	2	old	rs4849887	0.93(0.84-1.03)	0.16	0.91(0.88-0.95)	1.7e-06	0.92(0.89-0.96)	3e-06	1e-11	1.06e-19	+++
chr2	121241958	121241958	rs7575067	2_121241958_T_C	2_121245122_T_C	2	old	rs4849887	0.93(0.84-1.03)	0.16	0.91(0.88-0.95)	1.7e-06	0.92(0.89-0.96)	3e-06	1e-11	2.07e-19	+++
chr2	121242087	121242087	rs7575205	2_121242087_T_C	2_121245122_T_C	2	old	rs4849887	0.93(0.84-1.03)	0.16	0.91(0.88-0.95)	1.7e-06	0.92(0.89-0.96)	3e-06	1e-11	1.24e-19	+++
chr2	121242996	121242996	rs4848600	2_121242996_C_T	2_121245122_T_C	2	old	rs4849887	0.93(0.84-1.03)	0.16	0.91(0.88-0.95)	1.7e-06	0.92(0.89-0.96)	3e-06	1e-11	9.9e-20	+++
chr2	121243011	121243011	rs4848601	2_121243011_G_C	2_121245122_T_C	2	old	rs4849887	0.93(0.84-1.03)	0.16	0.91(0.88-0.95)	1.7e-06	0.92(0.89-0.96)	3e-06	1e-11	7.85e-20	+++
chr2	121243108	121243108	rs4848602	2_121243108_C_T	2_121245122_T_C	2	old	rs4849887	0.93(0.84-1.03)	0.16	0.91(0.88-0.95)	1.7e-06	0.92(0.89-0.96)	3e-06	1e-11	8.89e-20	+++
chr2	121243112	121243112	rs4848603	2_121243112_C_T	2_121245122_T_C	2	old	rs4849887	0.93(0.84-1.03)	0.16	0.91(0.88-0.95)	1.7e-06	0.92(0.89-0.96)	3e-06	1e-11	9.47e-20	+++
chr2	121243478	121243478	rs4849881	2_121243478_C_A	2_121245122_T_C	2	old	rs4849887	0.93(0.84-1.03)	0.16	0.91(0.88-0.95)	1.7e-06	0.92(0.89-0.96)	3e-06	1e-11	8.88e-20	+++
chr2	121243526	121243526	rs7598664	2_121243526_C_T	2_121245122_T_C	2	old	rs4849887	0.93(0.84-1.03)	0.16	0.91(0.88-0.95)	1.7e-06	0.92(0.89-0.96)	3e-06	1e-11	9.47e-20	+++
chr2	121243690	121243690	rs7571527	2_121243690_G_A	2_121245122_T_C	2	old	rs4849887	0.93(0.84-1.03)	0.16	0.91(0.88-0.95)	1.7e-06	0.92(0.89-0.96)	3e-06	1e-11	2.63e-19	+++
chr2	121243713	121243713	rs4849882	2_121243713_C_A	2_121245122_T_C	2	old	rs4849887	0.93(0.84-1.03)	0.16	0.91(0.88-0.95)	1.7e-06	0.92(0.89-0.96)	3e-06	1e-11	2.43e-19	+++
chr2	121243737	121243737	rs7571543	2_121243737_G_A	2_121245122_T_C	2	old	rs4849887	0.93(0.84-1.03)	0.16	0.91(0.88-0.95)	1.7e-06	0.92(0.89-0.96)	3e-06	1e-11	2.43e-19	+++
chr2	121244132	121244132	rs12711945	2_121244132_G_A	2_121245122_T_C	2	old	rs4849887	0.93(0.84-1.03)	0.16	0.91(0.88-0.95)	1.7e-06	0.92(0.89-0.96)	3e-06	1e-11	1.04e-19	+++
chr2	121244172	121244172	rs12711946	2_121244172_G_A	2_121245122_T_C	2	old	rs4849887	0.93(0.84-1.03)	0.16	0.91(0.88-0.95)	1.7e-06	0.92(0.89-0.96)	3e-06	1e-11	1.06e-19	+++
chr2	121244272	121244272	rs12711947	2_121244272_T_C	2_121245122_T_C	2	old	rs4849887	0.93(0.84-1.03)	0.16	0.91(0.88-0.95)	1.7e-06	0.92(0.89-0.96)	3e-06	1e-11	3.29e-20	+++
chr2	121244321	121244321	rs12711948	2_121244321_C_T	2_121245122_T_C	2	old	rs4849887	0.93(0.84-1.03)	0.16	0.91(0.88-0.95)	1.7e-06	0.92(0.89-0.96)	3e-06	1e-11	1e-19	+++
chr2	121244492	121244492	rs9308781	2_121244492_G_A	2_121245122_T_C	2	old	rs4849887	0.93(0.84-1.03)	0.16	0.91(0.88-0.95)	1.7e-06	0.92(0.89-0.96)	3e-06	1e-11	8.12e-20	+++
chr2	121244509	121244509	rs9789411	2_121244509_T_C	2_121245122_T_C	2	old	rs4849887	0.93(0.84-1.03)	0.16	0.91(0.88-0.95)	1.7e-06	0.92(0.89-0.96)	3e-06	1e-11	1.01e-19	+++
chr2	121244809	121244809	rs9308782	2_121244809_A_G	2_121245122_T_C	2	old	rs4849887	0.93(0.84-1.03)	0.16	0.91(0.88-0.95)	1.7e-06	0.92(0.89-0.96)	3e-06	1e-11	1.07e-19	+++
chr2	121244905	121244905	rs4849883	2_121244905_C_T	2_121245122_T_C	2	old	rs4849887	0.93(0.84-1.03)	0.16	0.91(0.88-0.95)	1.7e-06	0.92(0.89-0.96)	3e-06	1e-11	7.5e-20	+++
chr2	121244947	121244947	rs4849884	2_121244947_A_C	2_121245122_T_C	2	old	rs4849887	0.93(0.84-1.03)	0.16	0.91(0.88-0.95)	1.7e-06	0.92(0.89-0.96)	3e-06	1e-11	8.98e-20	+++
chr2	121245080	121245080	rs4849885	2_121245080_T_C	2_121245122_T_C	2	old	rs4849887	0.93(0.84-1.03)	0.16	0.91(0.88-0.95)	1.7e-06	0.92(0.89-0.96)	3e-06	1e-11	9.25e-20	+++
chr2	121245096	121245096	rs4849886	2_121245096_T_C	2_121245122_T_C	2	old	rs4849887	0.93(0.84-1.03)	0.16	0.91(0.88-0.95)	1.7e-06	0.92(0.89-0.96)	3e-06	1e-11	7.81e-20	+++
chr2	121245122	121245122	rs4849887	2_121245122_T_C	2_121245122_T_C	2	old	rs4849887	0.93(0.84-1.03)	0.16	0.91(0.88-0.95)	1.7e-06	0.92(0.89-0.96)	3e-06	1e-11	6.92e-20	+++
chr2	121245483	121245483	rs200230618	2_121245483_TGCCTG_T	2_121245122_T_C	2	old	rs4849887	0.93(0.84-1.03)	0.16	0.91(0.88-0.95)	1.7e-06	0.92(0.89-0.96)	3e-06	1e-11	6.38e-20	+++
chr2	121245540	121245540	rs12616822	2_121245540_G_A	2_121245122_T_C	2	old	rs4849887	0.93(0.84-1.03)	0.16	0.91(0.88-0.95)	1.7e-06	0.92(0.89-0.96)	3e-06	1e-11	7.21e-20	+++
chr2	121245603	121245603	rs11123555	2_121245603_T_C	2_121245122_T_C	2	old	rs4849887	0.93(0.84-1.03)	0.16	0.91(0.88-0.95)	1.7e-06	0.92(0.89-0.96)	3e-06	1e-11	6.63e-20	+++
chr2	121245613	121245613	rs12616849	2_121245613_G_C	2_121245122_T_C	2	old	rs4849887	0.93(0.84-1.03)	0.16	0.91(0.88-0.95)	1.7e-06	0.92(0.89-0.96)	3e-06	1e-11	7.11e-20	+++
chr2	121245614	121245614	rs12616850	2_121245614_G_T	2_121245122_T_C	2	old	rs4849887	0.93(0.84-1.03)	0.16	0.91(0.88-0.95)	1.7e-06	0.92(0.89-0.96)	3e-06	1e-11	7.57e-20	+++
chr2	121245735	121245735	rs10864991	2_121245735_G_A	2_121245122_T_C	2	old	rs4849887	0.93(0.84-1.03)	0.16	0.91(0.88-0.95)	1.7e-06	0.92(0.89-0.96)	3e-06	1e-11	7.15e-20	+++
chr2	121245996	121245996	rs11123556	2_121245996_A_G	2_121245122_T_C	2	old	rs4849887	0.93(0.84-1.03)	0.16	0.91(0.88-0.95)	1.7e-06	0.92(0.89-0.96)	3e-06	1e-11	5.27e-20	+++
chr2	121246568	121246568	rs10179592	2_121246568_T_C	2_121245122_T_C	2	old	rs4849887	0.93(0.84-1.03)	0.16	0.91(0.88-0.95)	1.7e-06	0.92(0.89-0.96)	3e-06	1e-11	2.82e-20	+++
chr2	172967302	172967302	rs743605	2_172967302_C_T	2_172972971_G_A	2	old	rs2016394	0.96(0.9-1.02)	0.15	0.94(0.92-0.96)	2e-08	0.94(0.92-0.96)	7e-09	3.2e-16	2.15e-11	---
chr2	172972971	172972971	rs2016394	2_172972971_G_A	2_172972971_G_A	2	old	rs2016394	0.96(0.9-1.02)	0.15	0.94(0.92-0.96)	2e-08	0.94(0.92-0.96)	7e-09	3.2e-16	6.23e-12	---
chr2	172974566	172974566	rs17726078	2_172974566_C_G	2_172972971_G_A	2	old	rs2016394	0.96(0.9-1.02)	0.15	0.94(0.92-0.96)	2e-08	0.94(0.92-0.96)	7e-09	3.2e-16	7.61e-12	---
chr2	172976747	172976747	rs11407956	2_172976747_C_CT	2_172972971_G_A	2	old	rs2016394	0.96(0.9-1.02)	0.15	0.94(0.92-0.96)	2e-08	0.94(0.92-0.96)	7e-09	3.2e-16	5.04e-11	---
chr2	174198854	174198854	rs13006456	2_174198854_T_C	2_174212894_G_A	2	old	rs1550623	0.95(0.88-1.02)	0.16	0.95(0.92-0.98)	0.00088	0.94(0.91-0.97)	1e-05	1.3e-08	1.37e-09	+++
chr2	174204524	174204524	rs7604661	2_174204524_G_C	2_174212894_G_A	2	old	rs1550623	0.95(0.88-1.02)	0.16	0.95(0.92-0.98)	0.00088	0.94(0.91-0.97)	1e-05	1.3e-08	1.1e-09	+++
chr2	174205585	174205585	rs200725404	2_174205585_AAAAG_A	2_174212894_G_A	2	old	rs1550623	0.95(0.88-1.02)	0.16	0.95(0.92-0.98)	0.00088	0.94(0.91-0.97)	1e-05	1.3e-08	3.92e-10	+++
chr2	174207046	174207046	rs7576285	2_174207046_T_A	2_174212894_G_A	2	old	rs1550623	0.95(0.88-1.02)	0.16	0.95(0.92-0.98)	0.00088	0.94(0.91-0.97)	1e-05	1.3e-08	5.39e-10	+++
chr2	174207470	174207470	rs7589172	2_174207470_A_C	2_174212894_G_A	2	old	rs1550623	0.95(0.88-1.02)	0.16	0.95(0.92-0.98)	0.00088	0.94(0.91-0.97)	1e-05	1.3e-08	5.24e-10	+++
chr2	174209822	174209822	rs10204104	2_174209822_C_A	2_174212894_G_A	2	old	rs1550623	0.95(0.88-1.02)	0.16	0.95(0.92-0.98)	0.00088	0.94(0.91-0.97)	1e-05	1.3e-08	7.47e-10	+++
chr2	174210908	174210908	rs2010610	2_174210908_C_G	2_174212894_G_A	2	old	rs1550623	0.95(0.88-1.02)	0.16	0.95(0.92-0.98)	0.00088	0.94(0.91-0.97)	1e-05	1.3e-08	4.23e-10	+++
chr2	174212894	174212894	rs1550623	2_174212894_G_A	2_174212894_G_A	2	old	rs1550623	0.95(0.88-1.02)	0.16	0.95(0.92-0.98)	0.00088	0.94(0.91-0.97)	1e-05	1.3e-08	5.39e-10	+++
chr2	174212910	174212910	rs1550622	2_174212910_A_G	2_174212894_G_A	2	old	rs1550623	0.95(0.88-1.02)	0.16	0.95(0.92-0.98)	0.00088	0.94(0.91-0.97)	1e-05	1.3e-08	5.37e-10	+++
chr2	174216897	174216897	rs1579760	2_174216897_T_C	2_174212894_G_A	2	old	rs1550623	0.95(0.88-1.02)	0.16	0.95(0.92-0.98)	0.00088	0.94(0.91-0.97)	1e-05	1.3e-08	1.12e-09	+++
chr2	174219118	174219118	rs930313	2_174219118_C_G	2_174212894_G_A	2	old	rs1550623	0.95(0.88-1.02)	0.16	0.95(0.92-0.98)	0.00088	0.94(0.91-0.97)	1e-05	1.3e-08	1.66e-09	+++
chr2	202122995	202122995	rs3769823	2_202122995_A_G	2_202181247_C_T	2	old	rs1830298	1.12(1.05-1.20)	0.00054	1.05(1.02-1.07)	0.00037	1.05(1.03-1.08)	6.6e-06	1.6e-10	1.43e-16	---
chr2	202123430	202123430	rs3769821	2_202123430_C_T	2_202181247_C_T	2	old	rs1830298	1.12(1.05-1.20)	0.00054	1.05(1.02-1.07)	0.00037	1.05(1.03-1.08)	6.6e-06	1.6e-10	3.97e-18	---
chr2	202143928	202143928	rs10931936	2_202143928_T_C	2_202181247_C_T	2	old	rs1830298	1.12(1.05-1.20)	0.00054	1.05(1.02-1.07)	0.00037	1.05(1.03-1.08)	6.6e-06	1.6e-10	2.78e-16	---
chr2	202151163	202151163	rs3769818	2_202151163_A_G	2_202181247_C_T	2	old	rs1830298	1.12(1.05-1.20)	0.00054	1.05(1.02-1.07)	0.00037	1.05(1.03-1.08)	6.6e-06	1.6e-10	2.04e-16	---
chr2	202153225	202153225	rs700635	2_202153225_C_A	2_202181247_C_T	2	old	rs1830298	1.12(1.05-1.20)	0.00054	1.05(1.02-1.07)	0.00037	1.05(1.03-1.08)	6.6e-06	1.6e-10	1.88e-16	---
chr2	202153684	202153684	rs6714430	2_202153684_C_T	2_202181247_C_T	2	old	rs1830298	1.12(1.05-1.20)	0.00054	1.05(1.02-1.07)	0.00037	1.05(1.03-1.08)	6.6e-06	1.6e-10	1.95e-16	---
chr2	202153920	202153920	rs6743068	2_202153920_A_G	2_202181247_C_T	2	old	rs1830298	1.12(1.05-1.20)	0.00054	1.05(1.02-1.07)	0.00037	1.05(1.03-1.08)	6.6e-06	1.6e-10	2.12e-16	---
chr2	202160762	202160762	rs141470809	2_202160762_C_T	2_202181247_C_T	2	old	rs1830298	1.12(1.05-1.20)	0.00054	1.05(1.02-1.07)	0.00037	1.05(1.03-1.08)	6.6e-06	1.6e-10	1.46e-16	---
chr2	202165206	202165206	rs2080303	2_202165206_T_C	2_202181247_C_T	2	old	rs1830298	1.12(1.05-1.20)	0.00054	1.05(1.02-1.07)	0.00037	1.05(1.03-1.08)	6.6e-06	1.6e-10	1.62e-16	---
chr2	202170655	202170655	rs10200279	2_202170655_T_C	2_202181247_C_T	2	old	rs1830298	1.12(1.05-1.20)	0.00054	1.05(1.02-1.07)	0.00037	1.05(1.03-1.08)	6.6e-06	1.6e-10	1.91e-16	---
chr2	202176024	202176024	rs6719014	2_202176024_T_C	2_202181247_C_T	2	old	rs1830298	1.12(1.05-1.20)	0.00054	1.05(1.02-1.07)	0.00037	1.05(1.03-1.08)	6.6e-06	1.6e-10	1.77e-16	---
chr2	202176294	202176294	rs7582362	2_202176294_A_G	2_202181247_C_T	2	old	rs1830298	1.12(1.05-1.20)	0.00054	1.05(1.02-1.07)	0.00037	1.05(1.03-1.08)	6.6e-06	1.6e-10	1.77e-16	---
chr2	202181247	202181247	rs1830298	2_202181247_C_T	2_202181247_C_T	2	old	rs1830298	1.12(1.05-1.20)	0.00054	1.05(1.02-1.07)	0.00037	1.05(1.03-1.08)	6.6e-06	1.6e-10	1.87e-16	---
chr2	202184331	202184331	rs9677180	2_202184331_C_T	2_202181247_C_T	2	old	rs1830298	1.12(1.05-1.20)	0.00054	1.05(1.02-1.07)	0.00037	1.05(1.03-1.08)	6.6e-06	1.6e-10	1.86e-16	---
chr2	202186986	202186986	rs2349073	2_202186986_C_A	2_202181247_C_T	2	old	rs1830298	1.12(1.05-1.20)	0.00054	1.05(1.02-1.07)	0.00037	1.05(1.03-1.08)	6.6e-06	1.6e-10	2.97e-16	---
chr2	202204741	202204741	rs10197246	2_202204741_T_C	2_202181247_C_T	2	old	rs1830298	1.12(1.05-1.20)	0.00054	1.05(1.02-1.07)	0.00037	1.05(1.03-1.08)	6.6e-06	1.6e-10	2e-16	---
chr2	217920769	217920769	rs4442975	2_217920769_G_T	2_217920769_G_T	2	old	rs4442975	0.84(0.79-0.9)	2e-08	0.86(0.84-0.88)	2.3e-40	0.87(0.85-0.88)	1.1e-45	6.7e-91	1.14e-95	---
chr2	227200627	227200627	rs7593648	2_227200627_A_C	2_227226952_A_G	2	new	rs12479355	0.99(0.91-1.06)	0.7	0.96(0.93-0.98)	0.0017	0.96(0.93-0.98)	0.00052	3.5e-06	5.78e-08	---
chr2	227201107	227201107	rs7564552	2_227201107_T_C	2_227226952_A_G	2	new	rs12479355	0.99(0.91-1.06)	0.7	0.96(0.93-0.98)	0.0017	0.96(0.93-0.98)	0.00052	3.5e-06	6.54e-08	---
chr2	227201534	227201534	rs56349016	2_227201534_T_C	2_227226952_A_G	2	new	rs12479355	0.99(0.91-1.06)	0.7	0.96(0.93-0.98)	0.0017	0.96(0.93-0.98)	0.00052	3.5e-06	8.6e-08	---
chr2	227202252	227202252	rs11684509	2_227202252_G_A	2_227226952_A_G	2	new	rs12479355	0.99(0.91-1.06)	0.7	0.96(0.93-0.98)	0.0017	0.96(0.93-0.98)	0.00052	3.5e-06	8.85e-08	---
chr2	227204343	227204343	rs10170472	2_227204343_A_T	2_227226952_A_G	2	new	rs12479355	0.99(0.91-1.06)	0.7	0.96(0.93-0.98)	0.0017	0.96(0.93-0.98)	0.00052	3.5e-06	6.61e-08	---
chr2	227204499	227204499	rs148867797	2_227204499_T_TA	2_227226952_A_G	2	new	rs12479355	0.99(0.91-1.06)	0.7	0.96(0.93-0.98)	0.0017	0.96(0.93-0.98)	0.00052	3.5e-06	3.53e-07	---
chr2	227204649	227204649	rs11903688	2_227204649_T_C	2_227226952_A_G	2	new	rs12479355	0.99(0.91-1.06)	0.7	0.96(0.93-0.98)	0.0017	0.96(0.93-0.98)	0.00052	3.5e-06	6.47e-08	---
chr2	227205013	227205013	rs72963720	2_227205013_G_A	2_227226952_A_G	2	new	rs12479355	0.99(0.91-1.06)	0.7	0.96(0.93-0.98)	0.0017	0.96(0.93-0.98)	0.00052	3.5e-06	6.48e-08	---
chr2	227205138	227205138	rs13417503	2_227205138_C_T	2_227226952_A_G	2	new	rs12479355	0.99(0.91-1.06)	0.7	0.96(0.93-0.98)	0.0017	0.96(0.93-0.98)	0.00052	3.5e-06	6.69e-08	---
chr2	227207379	227207379	rs7587413	2_227207379_T_G	2_227226952_A_G	2	new	rs12479355	0.99(0.91-1.06)	0.7	0.96(0.93-0.98)	0.0017	0.96(0.93-0.98)	0.00052	3.5e-06	6.29e-08	---
chr2	227208518	227208518	rs13428915	2_227208518_G_T	2_227226952_A_G	2	new	rs12479355	0.99(0.91-1.06)	0.7	0.96(0.93-0.98)	0.0017	0.96(0.93-0.98)	0.00052	3.5e-06	7.41e-08	---
chr2	227208941	227208941	rs12052884	2_227208941_A_G	2_227226952_A_G	2	new	rs12479355	0.99(0.91-1.06)	0.7	0.96(0.93-0.98)	0.0017	0.96(0.93-0.98)	0.00052	3.5e-06	5.94e-08	---
chr2	227209724	227209724	rs4147475	2_227209724_C_T	2_227226952_A_G	2	new	rs12479355	0.99(0.91-1.06)	0.7	0.96(0.93-0.98)	0.0017	0.96(0.93-0.98)	0.00052	3.5e-06	9.23e-08	---
chr2	227211914	227211914	rs56089726	2_227211914_C_T	2_227226952_A_G	2	new	rs12479355	0.99(0.91-1.06)	0.7	0.96(0.93-0.98)	0.0017	0.96(0.93-0.98)	0.00052	3.5e-06	5.26e-08	---
chr2	227212508	227212508	rs2396318	2_227212508_T_C	2_227226952_A_G	2	new	rs12479355	0.99(0.91-1.06)	0.7	0.96(0.93-0.98)	0.0017	0.96(0.93-0.98)	0.00052	3.5e-06	4.91e-08	---
chr2	227214088	227214088	2:227214088	2_227214088_A_AT	2_227226952_A_G	2	new	rs12479355	0.99(0.91-1.06)	0.7	0.96(0.93-0.98)	0.0017	0.96(0.93-0.98)	0.00052	3.5e-06	1.18e-06	---
chr2	227226952	227226952	rs12479355	2_227226952_A_G	2_227226952_A_G	2	new	rs12479355	0.99(0.91-1.06)	0.7	0.96(0.93-0.98)	0.0017	0.96(0.93-0.98)	0.00052	3.5e-06	2.36e-08	---
chr2	227232184	227232184	rs12471184	2_227232184_G_A	2_227226952_A_G	2	new	rs12479355	0.99(0.91-1.06)	0.7	0.96(0.93-0.98)	0.0017	0.96(0.93-0.98)	0.00052	3.5e-06	2.34e-06	---
chr2	227235308	227235308	rs4266007	2_227235308_G_A	2_227226952_A_G	2	new	rs12479355	0.99(0.91-1.06)	0.7	0.96(0.93-0.98)	0.0017	0.96(0.93-0.98)	0.00052	3.5e-06	2.34e-06	---
chr2	227242490	227242490	rs12476661	2_227242490_G_A	2_227226952_A_G	2	new	rs12479355	0.99(0.91-1.06)	0.7	0.96(0.93-0.98)	0.0017	0.96(0.93-0.98)	0.00052	3.5e-06	4.4e-07	---
chr2	227243909	227243909	rs7574670	2_227243909_T_C	2_227226952_A_G	2	new	rs12479355	0.99(0.91-1.06)	0.7	0.96(0.93-0.98)	0.0017	0.96(0.93-0.98)	0.00052	3.5e-06	5.05e-08	---
chr2	227266027	227266027	rs12185715	2_227266027_C_T	2_227226952_A_G	2	new	rs12479355	0.99(0.91-1.06)	0.7	0.96(0.93-0.98)	0.0017	0.96(0.93-0.98)	0.00052	3.5e-06	1.74e-06	+++
chr2	227267303	227267303	rs34997190	2_227267303_TA_T	2_227226952_A_G	2	new	rs12479355	0.99(0.91-1.06)	0.7	0.96(0.93-0.98)	0.0017	0.96(0.93-0.98)	0.00052	3.5e-06	1.33e-06	+++
chr2	227267949	227267949	rs13002484	2_227267949_T_C	2_227226952_A_G	2	new	rs12479355	0.99(0.91-1.06)	0.7	0.96(0.93-0.98)	0.0017	0.96(0.93-0.98)	0.00052	3.5e-06	1.2e-06	+++
chr2	227268421	227268421	rs13003576	2_227268421_T_C	2_227226952_A_G	2	new	rs12479355	0.99(0.91-1.06)	0.7	0.96(0.93-0.98)	0.0017	0.96(0.93-0.98)	0.00052	3.5e-06	1.25e-06	+++
chr2	227268591	227268591	rs13032261	2_227268591_C_A	2_227226952_A_G	2	new	rs12479355	0.99(0.91-1.06)	0.7	0.96(0.93-0.98)	0.0017	0.96(0.93-0.98)	0.00052	3.5e-06	1.59e-06	+++
chr2	227269048	227269048	rs13009921	2_227269048_T_A	2_227226952_A_G	2	new	rs12479355	0.99(0.91-1.06)	0.7	0.96(0.93-0.98)	0.0017	0.96(0.93-0.98)	0.00052	3.5e-06	1e-06	+++
chr2	227274762	227274762	rs2396351	2_227274762_C_G	2_227226952_A_G	2	new	rs12479355	0.99(0.91-1.06)	0.7	0.96(0.93-0.98)	0.0017	0.96(0.93-0.98)	0.00052	3.5e-06	9.14e-07	+++
chr2	227277601	227277601	rs12694696	2_227277601_A_T	2_227226952_A_G	2	new	rs12479355	0.99(0.91-1.06)	0.7	0.96(0.93-0.98)	0.0017	0.96(0.93-0.98)	0.00052	3.5e-06	9.77e-07	+++
chr2	227277656	227277656	rs12694697	2_227277656_T_A	2_227226952_A_G	2	new	rs12479355	0.99(0.91-1.06)	0.7	0.96(0.93-0.98)	0.0017	0.96(0.93-0.98)	0.00052	3.5e-06	9.43e-07	+++
chr2	227277825	227277825	rs56254851	2_227277825_CAA_C	2_227226952_A_G	2	new	rs12479355	0.99(0.91-1.06)	0.7	0.96(0.93-0.98)	0.0017	0.96(0.93-0.98)	0.00052	3.5e-06	8.2e-07	+++
chr3	4728574	4728574	rs6787391	3_4728574_C_T	3_4742276_A_G	3	old	rs6762644	1.06(0.99-1.12)	0.083	1.07(1.05-1.09)	8.1e-09	1.06(1.04-1.08)	9.6e-08	1.2e-15	9.07e-19	+++
chr3	4742251	4742251	rs6762558	3_4742251_A_G	3_4742276_A_G	3	old	rs6762644	1.06(0.99-1.12)	0.083	1.07(1.05-1.09)	8.1e-09	1.06(1.04-1.08)	9.6e-08	1.2e-15	1.09e-18	+++
chr3	4742276	4742276	rs6762644	3_4742276_A_G	3_4742276_A_G	3	old	rs6762644	1.06(0.99-1.12)	0.083	1.07(1.05-1.09)	8.1e-09	1.06(1.04-1.08)	9.6e-08	1.2e-15	4.02e-18	+++
chr3	4742745	4742745	rs6765702	3_4742745_T_C	3_4742276_A_G	3	old	rs6762644	1.06(0.99-1.12)	0.083	1.07(1.05-1.09)	8.1e-09	1.06(1.04-1.08)	9.6e-08	1.2e-15	1.69e-17	+++
chr3	4742779	4742779	rs6774180	3_4742779_G_A	3_4742276_A_G	3	old	rs6762644	1.06(0.99-1.12)	0.083	1.07(1.05-1.09)	8.1e-09	1.06(1.04-1.08)	9.6e-08	1.2e-15	3.73e-18	+++
chr3	4742896	4742896	rs9841951	3_4742896_A_G	3_4742276_A_G	3	old	rs6762644	1.06(0.99-1.12)	0.083	1.07(1.05-1.09)	8.1e-09	1.06(1.04-1.08)	9.6e-08	1.2e-15	6.85e-18	+++
chr3	4743267	4743267	rs3828435	3_4743267_G_C	3_4742276_A_G	3	old	rs6762644	1.06(0.99-1.12)	0.083	1.07(1.05-1.09)	8.1e-09	1.06(1.04-1.08)	9.6e-08	1.2e-15	1.28e-17	+++
chr3	4743815	4743815	3:4743815	3_4743815_A_ATTAAAAAT	3_4742276_A_G	3	old	rs6762644	1.06(0.99-1.12)	0.083	1.07(1.05-1.09)	8.1e-09	1.06(1.04-1.08)	9.6e-08	1.2e-15	2.5e-18	+++
chr3	4743816	4743816	rs55963864	3_4743816_G_T	3_4742276_A_G	3	old	rs6762644	1.06(0.99-1.12)	0.083	1.07(1.05-1.09)	8.1e-09	1.06(1.04-1.08)	9.6e-08	1.2e-15	1.23e-17	+++
chr3	4743818	4743818	rs56040924	3_4743818_C_CTG	3_4742276_A_G	3	old	rs6762644	1.06(0.99-1.12)	0.083	1.07(1.05-1.09)	8.1e-09	1.06(1.04-1.08)	9.6e-08	1.2e-15	2.5e-18	+++
chr3	4744047	4744047	rs9831844	3_4744047_C_T	3_4742276_A_G	3	old	rs6762644	1.06(0.99-1.12)	0.083	1.07(1.05-1.09)	8.1e-09	1.06(1.04-1.08)	9.6e-08	1.2e-15	1.8e-17	+++
chr3	4745531	4745531	rs4510365	3_4745531_C_T	3_4742276_A_G	3	old	rs6762644	1.06(0.99-1.12)	0.083	1.07(1.05-1.09)	8.1e-09	1.06(1.04-1.08)	9.6e-08	1.2e-15	2.81e-17	+++
chr3	4745823	4745823	rs6784635	3_4745823_G_A	3_4742276_A_G	3	old	rs6762644	1.06(0.99-1.12)	0.083	1.07(1.05-1.09)	8.1e-09	1.06(1.04-1.08)	9.6e-08	1.2e-15	4.97e-17	+++
chr3	4745955	4745955	rs6784839	3_4745955_G_A	3_4742276_A_G	3	old	rs6762644	1.06(0.99-1.12)	0.083	1.07(1.05-1.09)	8.1e-09	1.06(1.04-1.08)	9.6e-08	1.2e-15	3.52e-17	+++
chr3	4746621	4746621	rs9862943	3_4746621_A_T	3_4742276_A_G	3	old	rs6762644	1.06(0.99-1.12)	0.083	1.07(1.05-1.09)	8.1e-09	1.06(1.04-1.08)	9.6e-08	1.2e-15	4.97e-17	+++
chr3	4746624	4746624	rs9866934	3_4746624_T_C	3_4742276_A_G	3	old	rs6762644	1.06(0.99-1.12)	0.083	1.07(1.05-1.09)	8.1e-09	1.06(1.04-1.08)	9.6e-08	1.2e-15	2.1e-17	+++
chr3	4746886	4746886	rs9880424	3_4746886_G_A	3_4742276_A_G	3	old	rs6762644	1.06(0.99-1.12)	0.083	1.07(1.05-1.09)	8.1e-09	1.06(1.04-1.08)	9.6e-08	1.2e-15	4.68e-17	+++
chr3	4747105	4747105	rs9871443	3_4747105_T_G	3_4742276_A_G	3	old	rs6762644	1.06(0.99-1.12)	0.083	1.07(1.05-1.09)	8.1e-09	1.06(1.04-1.08)	9.6e-08	1.2e-15	4.13e-17	+++
chr3	4747247	4747247	rs9867580	3_4747247_A_C	3_4742276_A_G	3	old	rs6762644	1.06(0.99-1.12)	0.083	1.07(1.05-1.09)	8.1e-09	1.06(1.04-1.08)	9.6e-08	1.2e-15	4.49e-17	+++
chr3	4747360	4747360	rs13313995	3_4747360_G_A	3_4742276_A_G	3	old	rs6762644	1.06(0.99-1.12)	0.083	1.07(1.05-1.09)	8.1e-09	1.06(1.04-1.08)	9.6e-08	1.2e-15	7e-17	+++
chr3	4748862	4748862	rs12330193	3_4748862_G_A	3_4742276_A_G	3	old	rs6762644	1.06(0.99-1.12)	0.083	1.07(1.05-1.09)	8.1e-09	1.06(1.04-1.08)	9.6e-08	1.2e-15	4e-17	+++
chr3	4751160	4751160	rs9877680	3_4751160_G_T	3_4742276_A_G	3	old	rs6762644	1.06(0.99-1.12)	0.083	1.07(1.05-1.09)	8.1e-09	1.06(1.04-1.08)	9.6e-08	1.2e-15	8.14e-17	+++
chr3	27266705	27266705	rs2004005	3_27266705_C_T	3_27416013_C_T	3	old	rs4973768	1.16(1.09-1.23)	9.6e-07	1.1(1.08-1.13)	1.1e-17	1.12(1.1-1.14)	2.6e-29	5.1e-49	4.59e-62	+++
chr3	27267343	27267343	rs11390955	3_27267343_A_AG	3_27416013_C_T	3	old	rs4973768	1.16(1.09-1.23)	9.6e-07	1.1(1.08-1.13)	1.1e-17	1.12(1.1-1.14)	2.6e-29	5.1e-49	6.71e-63	+++
chr3	27268398	27268398	rs7626742	3_27268398_G_T	3_27416013_C_T	3	old	rs4973768	1.16(1.09-1.23)	9.6e-07	1.1(1.08-1.13)	1.1e-17	1.12(1.1-1.14)	2.6e-29	5.1e-49	1.61e-63	+++
chr3	27292557	27292557	rs2034190	3_27292557_T_C	3_27416013_C_T	3	old	rs4973768	1.16(1.09-1.23)	9.6e-07	1.1(1.08-1.13)	1.1e-17	1.12(1.1-1.14)	2.6e-29	5.1e-49	7.98e-62	+++
chr3	27292683	27292683	rs2370941	3_27292683_C_A	3_27416013_C_T	3	old	rs4973768	1.16(1.09-1.23)	9.6e-07	1.1(1.08-1.13)	1.1e-17	1.12(1.1-1.14)	2.6e-29	5.1e-49	6.92e-62	+++
chr3	27296994	27296994	rs3214746	3_27296994_TA_T	3_27416013_C_T	3	old	rs4973768	1.16(1.09-1.23)	9.6e-07	1.1(1.08-1.13)	1.1e-17	1.12(1.1-1.14)	2.6e-29	5.1e-49	4.43e-62	+++
chr3	27299001	27299001	rs6551184	3_27299001_A_G	3_27416013_C_T	3	old	rs4973768	1.16(1.09-1.23)	9.6e-07	1.1(1.08-1.13)	1.1e-17	1.12(1.1-1.14)	2.6e-29	5.1e-49	2.32e-62	+++
chr3	27300176	27300176	rs80239926	3_27300176_T_G	3_27416013_C_T	3	old	rs4973768	1.16(1.09-1.23)	9.6e-07	1.1(1.08-1.13)	1.1e-17	1.12(1.1-1.14)	2.6e-29	5.1e-49	7.79e-63	+++
chr3	27303320	27303320	rs6804651	3_27303320_C_A	3_27416013_C_T	3	old	rs4973768	1.16(1.09-1.23)	9.6e-07	1.1(1.08-1.13)	1.1e-17	1.12(1.1-1.14)	2.6e-29	5.1e-49	7.63e-63	+++
chr3	27304258	27304258	rs6783112	3_27304258_G_A	3_27416013_C_T	3	old	rs4973768	1.16(1.09-1.23)	9.6e-07	1.1(1.08-1.13)	1.1e-17	1.12(1.1-1.14)	2.6e-29	5.1e-49	7.41e-63	+++
chr3	27304689	27304689	rs6551189	3_27304689_A_C	3_27416013_C_T	3	old	rs4973768	1.16(1.09-1.23)	9.6e-07	1.1(1.08-1.13)	1.1e-17	1.12(1.1-1.14)	2.6e-29	5.1e-49	8.32e-63	+++
chr3	27307155	27307155	rs1899998	3_27307155_C_T	3_27416013_C_T	3	old	rs4973768	1.16(1.09-1.23)	9.6e-07	1.1(1.08-1.13)	1.1e-17	1.12(1.1-1.14)	2.6e-29	5.1e-49	8.6e-63	+++
chr3	27307196	27307196	rs1899997	3_27307196_A_G	3_27416013_C_T	3	old	rs4973768	1.16(1.09-1.23)	9.6e-07	1.1(1.08-1.13)	1.1e-17	1.12(1.1-1.14)	2.6e-29	5.1e-49	7.19e-63	+++
chr3	27309145	27309145	rs7622813	3_27309145_C_T	3_27416013_C_T	3	old	rs4973768	1.16(1.09-1.23)	9.6e-07	1.1(1.08-1.13)	1.1e-17	1.12(1.1-1.14)	2.6e-29	5.1e-49	4.85e-63	+++
chr3	27310595	27310595	rs1579817	3_27310595_C_T	3_27416013_C_T	3	old	rs4973768	1.16(1.09-1.23)	9.6e-07	1.1(1.08-1.13)	1.1e-17	1.12(1.1-1.14)	2.6e-29	5.1e-49	8.26e-63	+++
chr3	27317846	27317846	rs11711853	3_27317846_C_A	3_27416013_C_T	3	old	rs4973768	1.16(1.09-1.23)	9.6e-07	1.1(1.08-1.13)	1.1e-17	1.12(1.1-1.14)	2.6e-29	5.1e-49	9.09e-63	+++
chr3	27317858	27317858	rs9838558	3_27317858_C_G	3_27416013_C_T	3	old	rs4973768	1.16(1.09-1.23)	9.6e-07	1.1(1.08-1.13)	1.1e-17	1.12(1.1-1.14)	2.6e-29	5.1e-49	6.34e-63	+++
chr3	27319538	27319538	rs11914763	3_27319538_A_T	3_27416013_C_T	3	old	rs4973768	1.16(1.09-1.23)	9.6e-07	1.1(1.08-1.13)	1.1e-17	1.12(1.1-1.14)	2.6e-29	5.1e-49	8.3e-63	+++
chr3	27326999	27326999	rs479566	3_27326999_T_C	3_27416013_C_T	3	old	rs4973768	1.16(1.09-1.23)	9.6e-07	1.1(1.08-1.13)	1.1e-17	1.12(1.1-1.14)	2.6e-29	5.1e-49	1.61e-62	+++
chr3	27327214	27327214	rs481519	3_27327214_C_T	3_27416013_C_T	3	old	rs4973768	1.16(1.09-1.23)	9.6e-07	1.1(1.08-1.13)	1.1e-17	1.12(1.1-1.14)	2.6e-29	5.1e-49	1.64e-62	+++
chr3	27327702	27327702	rs2590265	3_27327702_A_G	3_27416013_C_T	3	old	rs4973768	1.16(1.09-1.23)	9.6e-07	1.1(1.08-1.13)	1.1e-17	1.12(1.1-1.14)	2.6e-29	5.1e-49	1.44e-62	+++
chr3	27327965	27327965	rs3103743	3_27327965_A_C	3_27416013_C_T	3	old	rs4973768	1.16(1.09-1.23)	9.6e-07	1.1(1.08-1.13)	1.1e-17	1.12(1.1-1.14)	2.6e-29	5.1e-49	1.24e-62	+++
chr3	27330335	27330335	rs487930	3_27330335_C_A	3_27416013_C_T	3	old	rs4973768	1.16(1.09-1.23)	9.6e-07	1.1(1.08-1.13)	1.1e-17	1.12(1.1-1.14)	2.6e-29	5.1e-49	8.54e-63	+++
chr3	27330615	27330615	rs490706	3_27330615_G_A	3_27416013_C_T	3	old	rs4973768	1.16(1.09-1.23)	9.6e-07	1.1(1.08-1.13)	1.1e-17	1.12(1.1-1.14)	2.6e-29	5.1e-49	2.73e-63	+++
chr3	27332409	27332409	rs60936670	3_27332409_CTCAAAACA_C	3_27416013_C_T	3	old	rs4973768	1.16(1.09-1.23)	9.6e-07	1.1(1.08-1.13)	1.1e-17	1.12(1.1-1.14)	2.6e-29	5.1e-49	7.99e-64	+++
chr3	27335350	27335350	rs633157	3_27335350_A_T	3_27416013_C_T	3	old	rs4973768	1.16(1.09-1.23)	9.6e-07	1.1(1.08-1.13)	1.1e-17	1.12(1.1-1.14)	2.6e-29	5.1e-49	1.04e-62	+++
chr3	27337379	27337379	rs472146	3_27337379_T_C	3_27416013_C_T	3	old	rs4973768	1.16(1.09-1.23)	9.6e-07	1.1(1.08-1.13)	1.1e-17	1.12(1.1-1.14)	2.6e-29	5.1e-49	1.16e-62	+++
chr3	27341789	27341789	rs628802	3_27341789_A_G	3_27416013_C_T	3	old	rs4973768	1.16(1.09-1.23)	9.6e-07	1.1(1.08-1.13)	1.1e-17	1.12(1.1-1.14)	2.6e-29	5.1e-49	1.99e-62	+++
chr3	27341833	27341833	rs628866	3_27341833_C_T	3_27416013_C_T	3	old	rs4973768	1.16(1.09-1.23)	9.6e-07	1.1(1.08-1.13)	1.1e-17	1.12(1.1-1.14)	2.6e-29	5.1e-49	1.1e-62	+++
chr3	27343644	27343644	rs653465	3_27343644_C_T	3_27416013_C_T	3	old	rs4973768	1.16(1.09-1.23)	9.6e-07	1.1(1.08-1.13)	1.1e-17	1.12(1.1-1.14)	2.6e-29	5.1e-49	8.33e-63	+++
chr3	27344193	27344193	rs571978	3_27344193_A_G	3_27416013_C_T	3	old	rs4973768	1.16(1.09-1.23)	9.6e-07	1.1(1.08-1.13)	1.1e-17	1.12(1.1-1.14)	2.6e-29	5.1e-49	7.53e-63	+++
chr3	27345103	27345103	rs580057	3_27345103_G_A	3_27416013_C_T	3	old	rs4973768	1.16(1.09-1.23)	9.6e-07	1.1(1.08-1.13)	1.1e-17	1.12(1.1-1.14)	2.6e-29	5.1e-49	9.19e-63	+++
chr3	27352143	27352143	rs646157	3_27352143_T_A	3_27416013_C_T	3	old	rs4973768	1.16(1.09-1.23)	9.6e-07	1.1(1.08-1.13)	1.1e-17	1.12(1.1-1.14)	2.6e-29	5.1e-49	6.85e-63	+++
chr3	27353716	27353716	rs552647	3_27353716_C_A	3_27416013_C_T	3	old	rs4973768	1.16(1.09-1.23)	9.6e-07	1.1(1.08-1.13)	1.1e-17	1.12(1.1-1.14)	2.6e-29	5.1e-49	5.23e-63	+++
chr3	27355115	27355115	rs599298	3_27355115_T_C	3_27416013_C_T	3	old	rs4973768	1.16(1.09-1.23)	9.6e-07	1.1(1.08-1.13)	1.1e-17	1.12(1.1-1.14)	2.6e-29	5.1e-49	9.63e-63	+++
chr3	27356779	27356779	rs616820	3_27356779_C_G	3_27416013_C_T	3	old	rs4973768	1.16(1.09-1.23)	9.6e-07	1.1(1.08-1.13)	1.1e-17	1.12(1.1-1.14)	2.6e-29	5.1e-49	2.45e-62	+++
chr3	27358405	27358405	rs547518	3_27358405_A_T	3_27416013_C_T	3	old	rs4973768	1.16(1.09-1.23)	9.6e-07	1.1(1.08-1.13)	1.1e-17	1.12(1.1-1.14)	2.6e-29	5.1e-49	6.12e-63	+++
chr3	27361880	27361880	rs583298	3_27361880_T_C	3_27416013_C_T	3	old	rs4973768	1.16(1.09-1.23)	9.6e-07	1.1(1.08-1.13)	1.1e-17	1.12(1.1-1.14)	2.6e-29	5.1e-49	9.31e-63	+++
chr3	27371534	27371534	rs60050839	3_27371534_AC_A	3_27416013_C_T	3	old	rs4973768	1.16(1.09-1.23)	9.6e-07	1.1(1.08-1.13)	1.1e-17	1.12(1.1-1.14)	2.6e-29	5.1e-49	5.18e-62	---
chr3	30679970	30679970	rs12495646	3_30679970_C_A	3_30682939_G_C	3	old	rs12493607	1.04(0.98-1.11)	0.23	1.07(1.04-1.09)	5.7e-08	1.06(1.04-1.08)	1.5e-08	2.9e-15	1.73e-13	+++
chr3	30682150	30682150	rs11367094	3_30682150_TA_T	3_30682939_G_C	3	old	rs12493607	1.04(0.98-1.11)	0.23	1.07(1.04-1.09)	5.7e-08	1.06(1.04-1.08)	1.5e-08	2.9e-15	5.82e-13	+++
chr3	30682242	30682242	rs6801714	3_30682242_A_G	3_30682939_G_C	3	old	rs12493607	1.04(0.98-1.11)	0.23	1.07(1.04-1.09)	5.7e-08	1.06(1.04-1.08)	1.5e-08	2.9e-15	9.42e-14	+++
chr3	30682939	30682939	rs12493607	3_30682939_G_C	3_30682939_G_C	3	old	rs12493607	1.04(0.98-1.11)	0.23	1.07(1.04-1.09)	5.7e-08	1.06(1.04-1.08)	1.5e-08	2.9e-15	6.91e-14	+++
chr3	30682947	30682947	rs13093591	3_30682947_T_C	3_30682939_G_C	3	old	rs12493607	1.04(0.98-1.11)	0.23	1.07(1.04-1.09)	5.7e-08	1.06(1.04-1.08)	1.5e-08	2.9e-15	8.4e-14	+++
chr3	30683034	30683034	rs34771216	3_30683034_C_G	3_30682939_G_C	3	old	rs12493607	1.04(0.98-1.11)	0.23	1.07(1.04-1.09)	5.7e-08	1.06(1.04-1.08)	1.5e-08	2.9e-15	1.03e-13	+++
chr3	30683201	30683201	rs56277861	3_30683201_A_G	3_30682939_G_C	3	old	rs12493607	1.04(0.98-1.11)	0.23	1.07(1.04-1.09)	5.7e-08	1.06(1.04-1.08)	1.5e-08	2.9e-15	1.01e-13	+++
chr3	30684097	30684097	rs35263707	3_30684097_G_A	3_30682939_G_C	3	old	rs12493607	1.04(0.98-1.11)	0.23	1.07(1.04-1.09)	5.7e-08	1.06(1.04-1.08)	1.5e-08	2.9e-15	7.83e-14	+++
chr3	30684175	30684175	rs58601830	3_30684175_G_A	3_30682939_G_C	3	old	rs12493607	1.04(0.98-1.11)	0.23	1.07(1.04-1.09)	5.7e-08	1.06(1.04-1.08)	1.5e-08	2.9e-15	2.71e-14	+++
chr3	30684907	30684907	rs17838698	3_30684907_C_T	3_30682939_G_C	3	old	rs12493607	1.04(0.98-1.11)	0.23	1.07(1.04-1.09)	5.7e-08	1.06(1.04-1.08)	1.5e-08	2.9e-15	1.58e-14	+++
chr3	30686414	30686414	rs1155705	3_30686414_A_G	3_30682939_G_C	3	old	rs12493607	1.04(0.98-1.11)	0.23	1.07(1.04-1.09)	5.7e-08	1.06(1.04-1.08)	1.5e-08	2.9e-15	2.03e-13	+++
chr3	30686627	30686627	rs1155706	3_30686627_T_C	3_30682939_G_C	3	old	rs12493607	1.04(0.98-1.11)	0.23	1.07(1.04-1.09)	5.7e-08	1.06(1.04-1.08)	1.5e-08	2.9e-15	1.92e-13	+++
chr3	30686647	30686647	rs1155707	3_30686647_T_C	3_30682939_G_C	3	old	rs12493607	1.04(0.98-1.11)	0.23	1.07(1.04-1.09)	5.7e-08	1.06(1.04-1.08)	1.5e-08	2.9e-15	1.81e-13	+++
chr3	30686740	30686740	rs1155708	3_30686740_G_A	3_30682939_G_C	3	old	rs12493607	1.04(0.98-1.11)	0.23	1.07(1.04-1.09)	5.7e-08	1.06(1.04-1.08)	1.5e-08	2.9e-15	4.05e-13	+++
chr3	30686897	30686897	rs11129422	3_30686897_T_A	3_30682939_G_C	3	old	rs12493607	1.04(0.98-1.11)	0.23	1.07(1.04-1.09)	5.7e-08	1.06(1.04-1.08)	1.5e-08	2.9e-15	2.02e-13	+++
chr3	30686931	30686931	rs11917237	3_30686931_T_G	3_30682939_G_C	3	old	rs12493607	1.04(0.98-1.11)	0.23	1.07(1.04-1.09)	5.7e-08	1.06(1.04-1.08)	1.5e-08	2.9e-15	1.89e-13	+++
chr3	30687023	30687023	rs13095432	3_30687023_G_C	3_30682939_G_C	3	old	rs12493607	1.04(0.98-1.11)	0.23	1.07(1.04-1.09)	5.7e-08	1.06(1.04-1.08)	1.5e-08	2.9e-15	1.04e-13	+++
chr3	30687030	30687030	rs11917266	3_30687030_T_C	3_30682939_G_C	3	old	rs12493607	1.04(0.98-1.11)	0.23	1.07(1.04-1.09)	5.7e-08	1.06(1.04-1.08)	1.5e-08	2.9e-15	2.04e-13	+++
chr3	30687082	30687082	rs13079374	3_30687082_T_A	3_30682939_G_C	3	old	rs12493607	1.04(0.98-1.11)	0.23	1.07(1.04-1.09)	5.7e-08	1.06(1.04-1.08)	1.5e-08	2.9e-15	1.94e-13	+++
chr3	30687273	30687273	rs4586858	3_30687273_C_T	3_30682939_G_C	3	old	rs12493607	1.04(0.98-1.11)	0.23	1.07(1.04-1.09)	5.7e-08	1.06(1.04-1.08)	1.5e-08	2.9e-15	1.92e-13	+++
chr3	30687311	30687311	rs4016205	3_30687311_C_CCTCTCT	3_30682939_G_C	3	old	rs12493607	1.04(0.98-1.11)	0.23	1.07(1.04-1.09)	5.7e-08	1.06(1.04-1.08)	1.5e-08	2.9e-15	1.63e-13	+++
chr3	30687554	30687554	rs2372092	3_30687554_A_T	3_30682939_G_C	3	old	rs12493607	1.04(0.98-1.11)	0.23	1.07(1.04-1.09)	5.7e-08	1.06(1.04-1.08)	1.5e-08	2.9e-15	1.22e-13	+++
chr3	30687715	30687715	rs13100576	3_30687715_C_G	3_30682939_G_C	3	old	rs12493607	1.04(0.98-1.11)	0.23	1.07(1.04-1.09)	5.7e-08	1.06(1.04-1.08)	1.5e-08	2.9e-15	1.66e-13	+++
chr3	30687969	30687969	rs13081020	3_30687969_T_C	3_30682939_G_C	3	old	rs12493607	1.04(0.98-1.11)	0.23	1.07(1.04-1.09)	5.7e-08	1.06(1.04-1.08)	1.5e-08	2.9e-15	1.83e-13	+++
chr3	30688511	30688511	rs57037798	3_30688511_G_A	3_30682939_G_C	3	old	rs12493607	1.04(0.98-1.11)	0.23	1.07(1.04-1.09)	5.7e-08	1.06(1.04-1.08)	1.5e-08	2.9e-15	1.2e-13	+++
chr3	30688640	30688640	rs58965035	3_30688640_C_T	3_30682939_G_C	3	old	rs12493607	1.04(0.98-1.11)	0.23	1.07(1.04-1.09)	5.7e-08	1.06(1.04-1.08)	1.5e-08	2.9e-15	2.41e-13	+++
chr3	46888198	46888198	rs56387622	3_46888198_T_C	3_46866866_G_A	3	old	rs6796502	0.94(0.84-1.05)	0.26	0.91(0.87-0.95)	2.3e-06	0.92(0.89-0.95)	3.4e-07	2.2e-12	5.47e-19	---
chr3	46888471	46888471	rs67529903	3_46888471_A_G	3_46866866_G_A	3	old	rs6796502	0.94(0.84-1.05)	0.26	0.91(0.87-0.95)	2.3e-06	0.92(0.89-0.95)	3.4e-07	2.2e-12	7.8e-19	---
chr3	46888509	46888509	rs73065135	3_46888509_G_C	3_46866866_G_A	3	old	rs6796502	0.94(0.84-1.05)	0.26	0.91(0.87-0.95)	2.3e-06	0.92(0.89-0.95)	3.4e-07	2.2e-12	7.79e-19	---
chr3	46889187	46889187	rs6787229	3_46889187_G_A	3_46866866_G_A	3	old	rs6796502	0.94(0.84-1.05)	0.26	0.91(0.87-0.95)	2.3e-06	0.92(0.89-0.95)	3.4e-07	2.2e-12	5.8e-19	---
chr3	46890566	46890566	rs137855086	3_46890566_G_GT	3_46866866_G_A	3	old	rs6796502	0.94(0.84-1.05)	0.26	0.91(0.87-0.95)	2.3e-06	0.92(0.89-0.95)	3.4e-07	2.2e-12	1.23e-18	---
chr3	46893173	46893173	rs143048713	3_46893173_G_GGT	3_46866866_G_A	3	old	rs6796502	0.94(0.84-1.05)	0.26	0.91(0.87-0.95)	2.3e-06	0.92(0.89-0.95)	3.4e-07	2.2e-12	8.42e-19	---
chr3	63828780	63828780	rs73120898	3_63828780_G_A	3_63967900_A_G	3	old	rs1053338	1.1(1-1.2)	0.039	1.08(1.05-1.12)	2.9e-06	1.03(1.01-1.06)	0.019	2.1e-07	1.06e-10	+++
chr3	63841228	63841228	rs73122704	3_63841228_C_T	3_63967900_A_G	3	old	rs1053338	1.1(1-1.2)	0.039	1.08(1.05-1.12)	2.9e-06	1.03(1.01-1.06)	0.019	2.1e-07	2.92e-11	+++
chr3	63842449	63842449	rs111234932	3_63842449_C_T	3_63967900_A_G	3	old	rs1053338	1.1(1-1.2)	0.039	1.08(1.05-1.12)	2.9e-06	1.03(1.01-1.06)	0.019	2.1e-07	8.14e-11	+++
chr3	63846672	63846672	rs56329572	3_63846672_G_A	3_63967900_A_G	3	old	rs1053338	1.1(1-1.2)	0.039	1.08(1.05-1.12)	2.9e-06	1.03(1.01-1.06)	0.019	2.1e-07	1.17e-10	+++
chr3	63849043	63849043	rs2276863	3_63849043_C_A	3_63967900_A_G	3	old	rs1053338	1.1(1-1.2)	0.039	1.08(1.05-1.12)	2.9e-06	1.03(1.01-1.06)	0.019	2.1e-07	1.22e-10	+++
chr3	63850660	63850660	rs3733121	3_63850660_C_G	3_63967900_A_G	3	old	rs1053338	1.1(1-1.2)	0.039	1.08(1.05-1.12)	2.9e-06	1.03(1.01-1.06)	0.019	2.1e-07	2.15e-11	+++
chr3	63851495	63851495	rs184702073	3_63851495_C_T	3_63967900_A_G	3	old	rs1053338	1.1(1-1.2)	0.039	1.08(1.05-1.12)	2.9e-06	1.03(1.01-1.06)	0.019	2.1e-07	7.28e-11	+++
chr3	63857837	63857837	rs138910364	3_63857837_CTT_C	3_63967900_A_G	3	old	rs1053338	1.1(1-1.2)	0.039	1.08(1.05-1.12)	2.9e-06	1.03(1.01-1.06)	0.019	2.1e-07	6.54e-11	+++
chr3	63859813	63859813	rs73130534	3_63859813_A_G	3_63967900_A_G	3	old	rs1053338	1.1(1-1.2)	0.039	1.08(1.05-1.12)	2.9e-06	1.03(1.01-1.06)	0.019	2.1e-07	2.36e-11	+++
chr3	63863022	63863022	rs56263032	3_63863022_G_A	3_63967900_A_G	3	old	rs1053338	1.1(1-1.2)	0.039	1.08(1.05-1.12)	2.9e-06	1.03(1.01-1.06)	0.019	2.1e-07	2.7e-11	+++
chr3	63865163	63865163	rs200065951	3_63865163_GTTTT_G	3_63967900_A_G	3	old	rs1053338	1.1(1-1.2)	0.039	1.08(1.05-1.12)	2.9e-06	1.03(1.01-1.06)	0.019	2.1e-07	4.28e-11	+++
chr3	63866286	63866286	rs56126667	3_63866286_A_G	3_63967900_A_G	3	old	rs1053338	1.1(1-1.2)	0.039	1.08(1.05-1.12)	2.9e-06	1.03(1.01-1.06)	0.019	2.1e-07	2.78e-11	+++
chr3	63868596	63868596	rs73130544	3_63868596_G_A	3_63967900_A_G	3	old	rs1053338	1.1(1-1.2)	0.039	1.08(1.05-1.12)	2.9e-06	1.03(1.01-1.06)	0.019	2.1e-07	3.51e-11	+++
chr3	63869216	63869216	rs3836523	3_63869216_TA_T	3_63967900_A_G	3	old	rs1053338	1.1(1-1.2)	0.039	1.08(1.05-1.12)	2.9e-06	1.03(1.01-1.06)	0.019	2.1e-07	9.5e-11	+++
chr3	63877938	63877938	rs144754108	3_63877938_T_TA	3_63967900_A_G	3	old	rs1053338	1.1(1-1.2)	0.039	1.08(1.05-1.12)	2.9e-06	1.03(1.01-1.06)	0.019	2.1e-07	1.41e-10	+++
chr3	63881549	63881549	rs3774708	3_63881549_A_C	3_63967900_A_G	3	old	rs1053338	1.1(1-1.2)	0.039	1.08(1.05-1.12)	2.9e-06	1.03(1.01-1.06)	0.019	2.1e-07	1.21e-11	+++
chr3	63887135	63887135	rs73130565	3_63887135_T_C	3_63967900_A_G	3	old	rs1053338	1.1(1-1.2)	0.039	1.08(1.05-1.12)	2.9e-06	1.03(1.01-1.06)	0.019	2.1e-07	7.67e-12	+++
chr3	63887449	63887449	rs147250346	3_63887449_T_TTG	3_63967900_A_G	3	old	rs1053338	1.1(1-1.2)	0.039	1.08(1.05-1.12)	2.9e-06	1.03(1.01-1.06)	0.019	2.1e-07	7.77e-12	+++
chr3	63890875	63890875	rs73130576	3_63890875_T_C	3_63967900_A_G	3	old	rs1053338	1.1(1-1.2)	0.039	1.08(1.05-1.12)	2.9e-06	1.03(1.01-1.06)	0.019	2.1e-07	8.22e-12	+++
chr3	63892725	63892725	rs73117036	3_63892725_G_C	3_63967900_A_G	3	old	rs1053338	1.1(1-1.2)	0.039	1.08(1.05-1.12)	2.9e-06	1.03(1.01-1.06)	0.019	2.1e-07	2.67e-11	+++
chr3	63896266	63896266	rs73117041	3_63896266_A_T	3_63967900_A_G	3	old	rs1053338	1.1(1-1.2)	0.039	1.08(1.05-1.12)	2.9e-06	1.03(1.01-1.06)	0.019	2.1e-07	2.79e-11	+++
chr3	63896543	63896543	rs73117042	3_63896543_T_C	3_63967900_A_G	3	old	rs1053338	1.1(1-1.2)	0.039	1.08(1.05-1.12)	2.9e-06	1.03(1.01-1.06)	0.019	2.1e-07	1.3e-11	+++
chr3	63901180	63901180	rs6809100	3_63901180_A_G	3_63967900_A_G	3	old	rs1053338	1.1(1-1.2)	0.039	1.08(1.05-1.12)	2.9e-06	1.03(1.01-1.06)	0.019	2.1e-07	3.68e-11	+++
chr3	63909084	63909084	rs147281827	3_63909084_CA_C	3_63967900_A_G	3	old	rs1053338	1.1(1-1.2)	0.039	1.08(1.05-1.12)	2.9e-06	1.03(1.01-1.06)	0.019	2.1e-07	2.15e-10	+++
chr3	63910779	63910779	rs73117047	3_63910779_G_A	3_63967900_A_G	3	old	rs1053338	1.1(1-1.2)	0.039	1.08(1.05-1.12)	2.9e-06	1.03(1.01-1.06)	0.019	2.1e-07	1.06e-10	+++
chr3	63915689	63915689	rs73117057	3_63915689_A_G	3_63967900_A_G	3	old	rs1053338	1.1(1-1.2)	0.039	1.08(1.05-1.12)	2.9e-06	1.03(1.01-1.06)	0.019	2.1e-07	1.12e-10	+++
chr3	63916028	63916028	rs73117059	3_63916028_A_G	3_63967900_A_G	3	old	rs1053338	1.1(1-1.2)	0.039	1.08(1.05-1.12)	2.9e-06	1.03(1.01-1.06)	0.019	2.1e-07	1.7e-10	+++
chr3	63919876	63919876	rs3774715	3_63919876_T_C	3_63967900_A_G	3	old	rs1053338	1.1(1-1.2)	0.039	1.08(1.05-1.12)	2.9e-06	1.03(1.01-1.06)	0.019	2.1e-07	5.35e-11	+++
chr3	63924677	63924677	rs199874849	3_63924677_A_AT	3_63967900_A_G	3	old	rs1053338	1.1(1-1.2)	0.039	1.08(1.05-1.12)	2.9e-06	1.03(1.01-1.06)	0.019	2.1e-07	4.9e-12	+++
chr3	63926236	63926236	rs73117066	3_63926236_A_G	3_63967900_A_G	3	old	rs1053338	1.1(1-1.2)	0.039	1.08(1.05-1.12)	2.9e-06	1.03(1.01-1.06)	0.019	2.1e-07	4.95e-12	+++
chr3	63927739	63927739	rs6796317	3_63927739_A_G	3_63967900_A_G	3	old	rs1053338	1.1(1-1.2)	0.039	1.08(1.05-1.12)	2.9e-06	1.03(1.01-1.06)	0.019	2.1e-07	1.32e-11	+++
chr3	63939396	63939396	rs111526132	3_63939396_G_A	3_63967900_A_G	3	old	rs1053338	1.1(1-1.2)	0.039	1.08(1.05-1.12)	2.9e-06	1.03(1.01-1.06)	0.019	2.1e-07	1.45e-10	+++
chr3	63941697	63941697	rs3821902	3_63941697_T_G	3_63967900_A_G	3	old	rs1053338	1.1(1-1.2)	0.039	1.08(1.05-1.12)	2.9e-06	1.03(1.01-1.06)	0.019	2.1e-07	2.99e-12	+++
chr3	63942084	63942084	rs73117078	3_63942084_G_A	3_63967900_A_G	3	old	rs1053338	1.1(1-1.2)	0.039	1.08(1.05-1.12)	2.9e-06	1.03(1.01-1.06)	0.019	2.1e-07	1.68e-10	+++
chr3	63947128	63947128	rs6801346	3_63947128_G_A	3_63967900_A_G	3	old	rs1053338	1.1(1-1.2)	0.039	1.08(1.05-1.12)	2.9e-06	1.03(1.01-1.06)	0.019	2.1e-07	2.39e-10	+++
chr3	63948455	63948455	rs73117083	3_63948455_G_C	3_63967900_A_G	3	old	rs1053338	1.1(1-1.2)	0.039	1.08(1.05-1.12)	2.9e-06	1.03(1.01-1.06)	0.019	2.1e-07	1.84e-11	+++
chr3	63948696	63948696	rs73117087	3_63948696_A_G	3_63967900_A_G	3	old	rs1053338	1.1(1-1.2)	0.039	1.08(1.05-1.12)	2.9e-06	1.03(1.01-1.06)	0.019	2.1e-07	3.47e-11	+++
chr3	63950338	63950338	rs3774719	3_63950338_C_A	3_63967900_A_G	3	old	rs1053338	1.1(1-1.2)	0.039	1.08(1.05-1.12)	2.9e-06	1.03(1.01-1.06)	0.019	2.1e-07	3.6e-11	+++
chr3	63954490	63954490	rs17401592	3_63954490_A_G	3_63967900_A_G	3	old	rs1053338	1.1(1-1.2)	0.039	1.08(1.05-1.12)	2.9e-06	1.03(1.01-1.06)	0.019	2.1e-07	4.46e-11	+++
chr3	63954649	63954649	rs3774721	3_63954649_A_G	3_63967900_A_G	3	old	rs1053338	1.1(1-1.2)	0.039	1.08(1.05-1.12)	2.9e-06	1.03(1.01-1.06)	0.019	2.1e-07	4.3e-11	+++
chr3	63962678	63962678	rs6445387	3_63962678_C_G	3_63967900_A_G	3	old	rs1053338	1.1(1-1.2)	0.039	1.08(1.05-1.12)	2.9e-06	1.03(1.01-1.06)	0.019	2.1e-07	1.08e-10	+++
chr3	63965304	63965304	rs2241822	3_63965304_A_G	3_63967900_A_G	3	old	rs1053338	1.1(1-1.2)	0.039	1.08(1.05-1.12)	2.9e-06	1.03(1.01-1.06)	0.019	2.1e-07	1.58e-11	+++
chr3	63967900	63967900	rs1053338	3_63967900_A_G	3_63967900_A_G	3	old	rs1053338	1.1(1-1.2)	0.039	1.08(1.05-1.12)	2.9e-06	1.03(1.01-1.06)	0.019	2.1e-07	5.31e-11	+++
chr3	63968469	63968469	rs142586136	3_63968469_CGTT_C	3_63967900_A_G	3	old	rs1053338	1.1(1-1.2)	0.039	1.08(1.05-1.12)	2.9e-06	1.03(1.01-1.06)	0.019	2.1e-07	3.37e-11	+++
chr3	63970192	63970192	rs10510903	3_63970192_C_G	3_63967900_A_G	3	old	rs1053338	1.1(1-1.2)	0.039	1.08(1.05-1.12)	2.9e-06	1.03(1.01-1.06)	0.019	2.1e-07	1.3e-10	+++
chr3	63977875	63977875	rs3774727	3_63977875_A_G	3_63967900_A_G	3	old	rs1053338	1.1(1-1.2)	0.039	1.08(1.05-1.12)	2.9e-06	1.03(1.01-1.06)	0.019	2.1e-07	1.22e-10	+++
chr3	63979834	63979834	rs73119022	3_63979834_T_C	3_63967900_A_G	3	old	rs1053338	1.1(1-1.2)	0.039	1.08(1.05-1.12)	2.9e-06	1.03(1.01-1.06)	0.019	2.1e-07	1.2e-10	+++
chr3	63984867	63984867	rs3832255	3_63984867_C_CT	3_63967900_A_G	3	old	rs1053338	1.1(1-1.2)	0.039	1.08(1.05-1.12)	2.9e-06	1.03(1.01-1.06)	0.019	2.1e-07	2.07e-10	+++
chr3	63986046	63986046	rs3836530	3_63986046_CT_C	3_63967900_A_G	3	old	rs1053338	1.1(1-1.2)	0.039	1.08(1.05-1.12)	2.9e-06	1.03(1.01-1.06)	0.019	2.1e-07	5.18e-11	+++
chr3	63988171	63988171	rs3733126	3_63988171_C_T	3_63967900_A_G	3	old	rs1053338	1.1(1-1.2)	0.039	1.08(1.05-1.12)	2.9e-06	1.03(1.01-1.06)	0.019	2.1e-07	1.32e-10	+++
chr3	63991721	63991721	rs11314349	3_63991721_AG_A	3_63967900_A_G	3	old	rs1053338	1.1(1-1.2)	0.039	1.08(1.05-1.12)	2.9e-06	1.03(1.01-1.06)	0.019	2.1e-07	5.37e-11	+++
chr3	63993025	63993025	rs73119034	3_63993025_G_A	3_63967900_A_G	3	old	rs1053338	1.1(1-1.2)	0.039	1.08(1.05-1.12)	2.9e-06	1.03(1.01-1.06)	0.019	2.1e-07	6.37e-11	+++
chr3	63993966	63993966	rs73119035	3_63993966_A_G	3_63967900_A_G	3	old	rs1053338	1.1(1-1.2)	0.039	1.08(1.05-1.12)	2.9e-06	1.03(1.01-1.06)	0.019	2.1e-07	1.33e-10	+++
chr3	63996262	63996262	rs1046025	3_63996262_C_T	3_63967900_A_G	3	old	rs1053338	1.1(1-1.2)	0.039	1.08(1.05-1.12)	2.9e-06	1.03(1.01-1.06)	0.019	2.1e-07	1.75e-10	+++
chr3	63999823	63999823	rs6802053	3_63999823_A_C	3_63967900_A_G	3	old	rs1053338	1.1(1-1.2)	0.039	1.08(1.05-1.12)	2.9e-06	1.03(1.01-1.06)	0.019	2.1e-07	1.15e-10	+++
chr3	64000464	64000464	rs66473811	3_64000464_T_C	3_63967900_A_G	3	old	rs1053338	1.1(1-1.2)	0.039	1.08(1.05-1.12)	2.9e-06	1.03(1.01-1.06)	0.019	2.1e-07	1.41e-10	+++
chr3	71514477	71514477	rs148029062	3_71514477_AGAAG_A	3_71532113_T_C	3	new	rs6805189	0.87(0.82-0.92)	4.8e-06	0.97(0.95-0.99)	0.007	0.96(0.94-0.98)	0.00024	3.8e-08	1.14e-06	---
chr3	71516857	71516857	rs13060421	3_71516857_T_G	3_71532113_T_C	3	new	rs6805189	0.87(0.82-0.92)	4.8e-06	0.97(0.95-0.99)	0.007	0.96(0.94-0.98)	0.00024	3.8e-08	7.78e-08	---
chr3	71517039	71517039	rs13075282	3_71517039_G_A	3_71532113_T_C	3	new	rs6805189	0.87(0.82-0.92)	4.8e-06	0.97(0.95-0.99)	0.007	0.96(0.94-0.98)	0.00024	3.8e-08	3.88e-06	---
chr3	71517527	71517527	rs11708920	3_71517527_G_T	3_71532113_T_C	3	new	rs6805189	0.87(0.82-0.92)	4.8e-06	0.97(0.95-0.99)	0.007	0.96(0.94-0.98)	0.00024	3.8e-08	6.83e-08	---
chr3	71517643	71517643	rs11706279	3_71517643_T_C	3_71532113_T_C	3	new	rs6805189	0.87(0.82-0.92)	4.8e-06	0.97(0.95-0.99)	0.007	0.96(0.94-0.98)	0.00024	3.8e-08	7.55e-08	---
chr3	71519604	71519604	rs35967223	3_71519604_G_A	3_71532113_T_C	3	new	rs6805189	0.87(0.82-0.92)	4.8e-06	0.97(0.95-0.99)	0.007	0.96(0.94-0.98)	0.00024	3.8e-08	3.56e-06	---
chr3	71522178	71522178	rs35540156	3_71522178_A_G	3_71532113_T_C	3	new	rs6805189	0.87(0.82-0.92)	4.8e-06	0.97(0.95-0.99)	0.007	0.96(0.94-0.98)	0.00024	3.8e-08	5.26e-08	---
chr3	71523093	71523093	rs36023390	3_71523093_C_T	3_71532113_T_C	3	new	rs6805189	0.87(0.82-0.92)	4.8e-06	0.97(0.95-0.99)	0.007	0.96(0.94-0.98)	0.00024	3.8e-08	2.43e-06	---
chr3	71523110	71523110	rs9819066	3_71523110_C_T	3_71532113_T_C	3	new	rs6805189	0.87(0.82-0.92)	4.8e-06	0.97(0.95-0.99)	0.007	0.96(0.94-0.98)	0.00024	3.8e-08	2.58e-06	---
chr3	71523285	71523285	rs56310245	3_71523285_G_A	3_71532113_T_C	3	new	rs6805189	0.87(0.82-0.92)	4.8e-06	0.97(0.95-0.99)	0.007	0.96(0.94-0.98)	0.00024	3.8e-08	2.54e-06	---
chr3	71523651	71523651	rs62247160	3_71523651_G_A	3_71532113_T_C	3	new	rs6805189	0.87(0.82-0.92)	4.8e-06	0.97(0.95-0.99)	0.007	0.96(0.94-0.98)	0.00024	3.8e-08	2.72e-06	---
chr3	71525367	71525367	rs9853632	3_71525367_T_C	3_71532113_T_C	3	new	rs6805189	0.87(0.82-0.92)	4.8e-06	0.97(0.95-0.99)	0.007	0.96(0.94-0.98)	0.00024	3.8e-08	2.71e-06	---
chr3	71525563	71525563	rs61458295	3_71525563_CTCTT_C	3_71532113_T_C	3	new	rs6805189	0.87(0.82-0.92)	4.8e-06	0.97(0.95-0.99)	0.007	0.96(0.94-0.98)	0.00024	3.8e-08	1.53e-06	---
chr3	71526205	71526205	rs17108	3_71526205_G_A	3_71532113_T_C	3	new	rs6805189	0.87(0.82-0.92)	4.8e-06	0.97(0.95-0.99)	0.007	0.96(0.94-0.98)	0.00024	3.8e-08	2.89e-06	---
chr3	71527191	71527191	rs34264449	3_71527191_T_C	3_71532113_T_C	3	new	rs6805189	0.87(0.82-0.92)	4.8e-06	0.97(0.95-0.99)	0.007	0.96(0.94-0.98)	0.00024	3.8e-08	6.53e-08	---
chr3	71527785	71527785	rs9836630	3_71527785_T_C	3_71532113_T_C	3	new	rs6805189	0.87(0.82-0.92)	4.8e-06	0.97(0.95-0.99)	0.007	0.96(0.94-0.98)	0.00024	3.8e-08	6.27e-08	---
chr3	71528078	71528078	rs9854068	3_71528078_G_C	3_71532113_T_C	3	new	rs6805189	0.87(0.82-0.92)	4.8e-06	0.97(0.95-0.99)	0.007	0.96(0.94-0.98)	0.00024	3.8e-08	3.66e-06	---
chr3	71529263	71529263	rs9859717	3_71529263_G_C	3_71532113_T_C	3	new	rs6805189	0.87(0.82-0.92)	4.8e-06	0.97(0.95-0.99)	0.007	0.96(0.94-0.98)	0.00024	3.8e-08	3.8e-06	---
chr3	71530346	71530346	rs9828629	3_71530346_C_T	3_71532113_T_C	3	new	rs6805189	0.87(0.82-0.92)	4.8e-06	0.97(0.95-0.99)	0.007	0.96(0.94-0.98)	0.00024	3.8e-08	3.09e-06	---
chr3	71531170	71531170	rs9853081	3_71531170_A_G	3_71532113_T_C	3	new	rs6805189	0.87(0.82-0.92)	4.8e-06	0.97(0.95-0.99)	0.007	0.96(0.94-0.98)	0.00024	3.8e-08	6.09e-08	---
chr3	71531467	71531467	rs35483362	3_71531467_T_C	3_71532113_T_C	3	new	rs6805189	0.87(0.82-0.92)	4.8e-06	0.97(0.95-0.99)	0.007	0.96(0.94-0.98)	0.00024	3.8e-08	4.73e-08	---
chr3	71531518	71531518	rs35911348	3_71531518_CT_C	3_71532113_T_C	3	new	rs6805189	0.87(0.82-0.92)	4.8e-06	0.97(0.95-0.99)	0.007	0.96(0.94-0.98)	0.00024	3.8e-08	4.71e-07	---
chr3	71531708	71531708	rs11715828	3_71531708_T_C	3_71532113_T_C	3	new	rs6805189	0.87(0.82-0.92)	4.8e-06	0.97(0.95-0.99)	0.007	0.96(0.94-0.98)	0.00024	3.8e-08	5.61e-08	---
chr3	71532113	71532113	rs6805189	3_71532113_T_C	3_71532113_T_C	3	new	rs6805189	0.87(0.82-0.92)	4.8e-06	0.97(0.95-0.99)	0.007	0.96(0.94-0.98)	0.00024	3.8e-08	4.6e-08	---
chr3	71532738	71532738	rs62247166	3_71532738_C_T	3_71532113_T_C	3	new	rs6805189	0.87(0.82-0.92)	4.8e-06	0.97(0.95-0.99)	0.007	0.96(0.94-0.98)	0.00024	3.8e-08	5.07e-08	---
chr3	71533378	71533378	rs13327339	3_71533378_G_C	3_71532113_T_C	3	new	rs6805189	0.87(0.82-0.92)	4.8e-06	0.97(0.95-0.99)	0.007	0.96(0.94-0.98)	0.00024	3.8e-08	5.2e-08	---
chr3	71535338	71535338	rs9878602	3_71535338_T_G	3_71532113_T_C	3	new	rs6805189	0.87(0.82-0.92)	4.8e-06	0.97(0.95-0.99)	0.007	0.96(0.94-0.98)	0.00024	3.8e-08	5.21e-08	---
chr3	71544614	71544614	rs7623765	3_71544614_A_G	3_71532113_T_C	3	new	rs6805189	0.87(0.82-0.92)	4.8e-06	0.97(0.95-0.99)	0.007	0.96(0.94-0.98)	0.00024	3.8e-08	5.62e-08	---
chr3	71618957	71618957	rs11710593	3_71618957_G_A	3_71532113_T_C	3	new	rs6805189	0.87(0.82-0.92)	4.8e-06	0.97(0.95-0.99)	0.007	0.96(0.94-0.98)	0.00024	3.8e-08	1.16e-06	---
chr3	71619707	71619707	rs13071807	3_71619707_T_C	3_71532113_T_C	3	new	rs6805189	0.87(0.82-0.92)	4.8e-06	0.97(0.95-0.99)	0.007	0.96(0.94-0.98)	0.00024	3.8e-08	3.19e-06	---
chr3	71619812	71619812	rs34068332	3_71619812_C_T	3_71532113_T_C	3	new	rs6805189	0.87(0.82-0.92)	4.8e-06	0.97(0.95-0.99)	0.007	0.96(0.94-0.98)	0.00024	3.8e-08	1.38e-06	---
chr3	71620116	71620116	rs11391200	3_71620116_A_AT	3_71532113_T_C	3	new	rs6805189	0.87(0.82-0.92)	4.8e-06	0.97(0.95-0.99)	0.007	0.96(0.94-0.98)	0.00024	3.8e-08	1.75e-06	---
chr3	71620223	71620223	rs9876924	3_71620223_C_T	3_71532113_T_C	3	new	rs6805189	0.87(0.82-0.92)	4.8e-06	0.97(0.95-0.99)	0.007	0.96(0.94-0.98)	0.00024	3.8e-08	1.11e-06	---
chr3	71620370	71620370	rs9825432	3_71620370_T_G	3_71532113_T_C	3	new	rs6805189	0.87(0.82-0.92)	4.8e-06	0.97(0.95-0.99)	0.007	0.96(0.94-0.98)	0.00024	3.8e-08	1.01e-06	---
chr3	71621652	71621652	rs3068915	3_71621652_T_TACTA	3_71532113_T_C	3	new	rs6805189	0.87(0.82-0.92)	4.8e-06	0.97(0.95-0.99)	0.007	0.96(0.94-0.98)	0.00024	3.8e-08	1.07e-06	---
chr3	71621669	71621669	rs2116709	3_71621669_T_A	3_71532113_T_C	3	new	rs6805189	0.87(0.82-0.92)	4.8e-06	0.97(0.95-0.99)	0.007	0.96(0.94-0.98)	0.00024	3.8e-08	7.02e-07	---
chr3	71622426	71622426	rs878173	3_71622426_T_C	3_71532113_T_C	3	new	rs6805189	0.87(0.82-0.92)	4.8e-06	0.97(0.95-0.99)	0.007	0.96(0.94-0.98)	0.00024	3.8e-08	1.11e-06	---
chr3	71622449	71622449	rs878172	3_71622449_A_G	3_71532113_T_C	3	new	rs6805189	0.87(0.82-0.92)	4.8e-06	0.97(0.95-0.99)	0.007	0.96(0.94-0.98)	0.00024	3.8e-08	1.88e-06	---
chr3	71622851	71622851	rs9817016	3_71622851_C_T	3_71532113_T_C	3	new	rs6805189	0.87(0.82-0.92)	4.8e-06	0.97(0.95-0.99)	0.007	0.96(0.94-0.98)	0.00024	3.8e-08	1.19e-06	---
chr3	71623603	71623603	rs6789491	3_71623603_A_G	3_71532113_T_C	3	new	rs6805189	0.87(0.82-0.92)	4.8e-06	0.97(0.95-0.99)	0.007	0.96(0.94-0.98)	0.00024	3.8e-08	1.2e-06	---
chr3	71626123	71626123	rs9828619	3_71626123_T_C	3_71532113_T_C	3	new	rs6805189	0.87(0.82-0.92)	4.8e-06	0.97(0.95-0.99)	0.007	0.96(0.94-0.98)	0.00024	3.8e-08	2.34e-06	---
chr3	71627682	71627682	rs2322031	3_71627682_T_C	3_71532113_T_C	3	new	rs6805189	0.87(0.82-0.92)	4.8e-06	0.97(0.95-0.99)	0.007	0.96(0.94-0.98)	0.00024	3.8e-08	1.17e-06	---
chr3	71629554	71629554	rs369875440	3_71629554_GA_GAA	3_71532113_T_C	3	new	rs6805189	0.87(0.82-0.92)	4.8e-06	0.97(0.95-0.99)	0.007	0.96(0.94-0.98)	0.00024	3.8e-08	1.85e-06	---
chr3	87037543	87037543	rs13066793	3_87037543_A_G	3_87037543_A_G	3	new	rs13066793	1.01(0.86-1.19)	0.87	0.94(0.9-0.97)	0.00093	0.93(0.89-0.96)	4.3e-05	2.5e-07	1.04e-09	---
chr3	99375151	99375151	rs648006	3_99375151_A_G	3_99723580_G_T	3	new	rs9833888	1.08(1-1.16)	0.044	1.04(1.01-1.06)	0.0084	1.07(1.04-1.09)	3.3e-08	6.1e-10	2.96e-08	---
chr3	99380959	99380959	rs1717609	3_99380959_G_A	3_99723580_G_T	3	new	rs9833888	1.08(1-1.16)	0.044	1.04(1.01-1.06)	0.0084	1.07(1.04-1.09)	3.3e-08	6.1e-10	7.87e-09	---
chr3	99390048	99390048	rs1581124	3_99390048_T_A	3_99723580_G_T	3	new	rs9833888	1.08(1-1.16)	0.044	1.04(1.01-1.06)	0.0084	1.07(1.04-1.09)	3.3e-08	6.1e-10	8.65e-09	---
chr3	99390181	99390181	rs1581123	3_99390181_G_A	3_99723580_G_T	3	new	rs9833888	1.08(1-1.16)	0.044	1.04(1.01-1.06)	0.0084	1.07(1.04-1.09)	3.3e-08	6.1e-10	8.42e-09	---
chr3	99391933	99391933	rs1711560	3_99391933_G_T	3_99723580_G_T	3	new	rs9833888	1.08(1-1.16)	0.044	1.04(1.01-1.06)	0.0084	1.07(1.04-1.09)	3.3e-08	6.1e-10	9.31e-09	---
chr3	99401709	99401709	rs11298677	3_99401709_TG_T	3_99723580_G_T	3	new	rs9833888	1.08(1-1.16)	0.044	1.04(1.01-1.06)	0.0084	1.07(1.04-1.09)	3.3e-08	6.1e-10	5.44e-09	---
chr3	99402004	99402004	rs1610255	3_99402004_T_C	3_99723580_G_T	3	new	rs9833888	1.08(1-1.16)	0.044	1.04(1.01-1.06)	0.0084	1.07(1.04-1.09)	3.3e-08	6.1e-10	9.41e-09	---
chr3	99403877	99403877	rs639355	3_99403877_G_A	3_99723580_G_T	3	new	rs9833888	1.08(1-1.16)	0.044	1.04(1.01-1.06)	0.0084	1.07(1.04-1.09)	3.3e-08	6.1e-10	2.15e-08	---
chr3	99410661	99410661	rs621061	3_99410661_C_T	3_99723580_G_T	3	new	rs9833888	1.08(1-1.16)	0.044	1.04(1.01-1.06)	0.0084	1.07(1.04-1.09)	3.3e-08	6.1e-10	2.25e-08	---
chr3	99415358	99415358	rs2458456	3_99415358_C_A	3_99723580_G_T	3	new	rs9833888	1.08(1-1.16)	0.044	1.04(1.01-1.06)	0.0084	1.07(1.04-1.09)	3.3e-08	6.1e-10	2.52e-08	---
chr3	99503359	99503359	rs1688771	3_99503359_T_A	3_99723580_G_T	3	new	rs9833888	1.08(1-1.16)	0.044	1.04(1.01-1.06)	0.0084	1.07(1.04-1.09)	3.3e-08	6.1e-10	5.34e-09	---
chr3	99503366	99503366	rs1688772	3_99503366_A_G	3_99723580_G_T	3	new	rs9833888	1.08(1-1.16)	0.044	1.04(1.01-1.06)	0.0084	1.07(1.04-1.09)	3.3e-08	6.1e-10	5.36e-09	---
chr3	99503728	99503728	rs1038294	3_99503728_A_G	3_99723580_G_T	3	new	rs9833888	1.08(1-1.16)	0.044	1.04(1.01-1.06)	0.0084	1.07(1.04-1.09)	3.3e-08	6.1e-10	6.88e-09	---
chr3	99507254	99507254	rs793496	3_99507254_T_C	3_99723580_G_T	3	new	rs9833888	1.08(1-1.16)	0.044	1.04(1.01-1.06)	0.0084	1.07(1.04-1.09)	3.3e-08	6.1e-10	6.88e-09	---
chr3	99512688	99512688	rs1718246	3_99512688_T_C	3_99723580_G_T	3	new	rs9833888	1.08(1-1.16)	0.044	1.04(1.01-1.06)	0.0084	1.07(1.04-1.09)	3.3e-08	6.1e-10	6.05e-09	---
chr3	99518987	99518987	rs793457	3_99518987_G_A	3_99723580_G_T	3	new	rs9833888	1.08(1-1.16)	0.044	1.04(1.01-1.06)	0.0084	1.07(1.04-1.09)	3.3e-08	6.1e-10	4.36e-09	---
chr3	99546110	99546110	rs793472	3_99546110_A_G	3_99723580_G_T	3	new	rs9833888	1.08(1-1.16)	0.044	1.04(1.01-1.06)	0.0084	1.07(1.04-1.09)	3.3e-08	6.1e-10	3.25e-09	---
chr3	99565576	99565576	rs793499	3_99565576_T_C	3_99723580_G_T	3	new	rs9833888	1.08(1-1.16)	0.044	1.04(1.01-1.06)	0.0084	1.07(1.04-1.09)	3.3e-08	6.1e-10	3.62e-09	---
chr3	99571926	99571926	rs704582	3_99571926_C_T	3_99723580_G_T	3	new	rs9833888	1.08(1-1.16)	0.044	1.04(1.01-1.06)	0.0084	1.07(1.04-1.09)	3.3e-08	6.1e-10	2.43e-09	---
chr3	99603230	99603230	rs1021103	3_99603230_G_A	3_99723580_G_T	3	new	rs9833888	1.08(1-1.16)	0.044	1.04(1.01-1.06)	0.0084	1.07(1.04-1.09)	3.3e-08	6.1e-10	1.68e-09	+++
chr3	99647850	99647850	rs1688766	3_99647850_G_A	3_99723580_G_T	3	new	rs9833888	1.08(1-1.16)	0.044	1.04(1.01-1.06)	0.0084	1.07(1.04-1.09)	3.3e-08	6.1e-10	1.53e-09	+++
chr3	99680086	99680086	rs4075038	3_99680086_A_G	3_99723580_G_T	3	new	rs9833888	1.08(1-1.16)	0.044	1.04(1.01-1.06)	0.0084	1.07(1.04-1.09)	3.3e-08	6.1e-10	1.33e-09	---
chr3	99684808	99684808	rs6805884	3_99684808_T_C	3_99723580_G_T	3	new	rs9833888	1.08(1-1.16)	0.044	1.04(1.01-1.06)	0.0084	1.07(1.04-1.09)	3.3e-08	6.1e-10	4.14e-08	---
chr3	99685686	99685686	rs4928149	3_99685686_T_A	3_99723580_G_T	3	new	rs9833888	1.08(1-1.16)	0.044	1.04(1.01-1.06)	0.0084	1.07(1.04-1.09)	3.3e-08	6.1e-10	3.41e-08	---
chr3	99687273	99687273	rs4361315	3_99687273_G_A	3_99723580_G_T	3	new	rs9833888	1.08(1-1.16)	0.044	1.04(1.01-1.06)	0.0084	1.07(1.04-1.09)	3.3e-08	6.1e-10	1.35e-09	---
chr3	99701134	99701134	rs7616988	3_99701134_G_A	3_99723580_G_T	3	new	rs9833888	1.08(1-1.16)	0.044	1.04(1.01-1.06)	0.0084	1.07(1.04-1.09)	3.3e-08	6.1e-10	1.71e-09	---
chr3	99702896	99702896	rs9867208	3_99702896_A_G	3_99723580_G_T	3	new	rs9833888	1.08(1-1.16)	0.044	1.04(1.01-1.06)	0.0084	1.07(1.04-1.09)	3.3e-08	6.1e-10	1.72e-09	---
chr3	99704861	99704861	rs4928234	3_99704861_T_C	3_99723580_G_T	3	new	rs9833888	1.08(1-1.16)	0.044	1.04(1.01-1.06)	0.0084	1.07(1.04-1.09)	3.3e-08	6.1e-10	1.16e-09	---
chr3	99705111	99705111	rs4571265	3_99705111_A_G	3_99723580_G_T	3	new	rs9833888	1.08(1-1.16)	0.044	1.04(1.01-1.06)	0.0084	1.07(1.04-1.09)	3.3e-08	6.1e-10	1.02e-09	---
chr3	99707246	99707246	rs9834484	3_99707246_A_G	3_99723580_G_T	3	new	rs9833888	1.08(1-1.16)	0.044	1.04(1.01-1.06)	0.0084	1.07(1.04-1.09)	3.3e-08	6.1e-10	2.18e-09	---
chr3	99707371	99707371	rs61144932	3_99707371_A_AG	3_99723580_G_T	3	new	rs9833888	1.08(1-1.16)	0.044	1.04(1.01-1.06)	0.0084	1.07(1.04-1.09)	3.3e-08	6.1e-10	2.31e-08	---
chr3	99711687	99711687	rs9873709	3_99711687_G_A	3_99723580_G_T	3	new	rs9833888	1.08(1-1.16)	0.044	1.04(1.01-1.06)	0.0084	1.07(1.04-1.09)	3.3e-08	6.1e-10	1.6e-09	+++
chr3	99711816	99711816	rs9873878	3_99711816_G_T	3_99723580_G_T	3	new	rs9833888	1.08(1-1.16)	0.044	1.04(1.01-1.06)	0.0084	1.07(1.04-1.09)	3.3e-08	6.1e-10	1.01e-09	+++
chr3	99712634	99712634	rs9878931	3_99712634_G_A	3_99723580_G_T	3	new	rs9833888	1.08(1-1.16)	0.044	1.04(1.01-1.06)	0.0084	1.07(1.04-1.09)	3.3e-08	6.1e-10	1.01e-09	+++
chr3	99713377	99713377	rs10212525	3_99713377_T_C	3_99723580_G_T	3	new	rs9833888	1.08(1-1.16)	0.044	1.04(1.01-1.06)	0.0084	1.07(1.04-1.09)	3.3e-08	6.1e-10	1.03e-09	+++
chr3	99714855	99714855	rs9852435	3_99714855_T_C	3_99723580_G_T	3	new	rs9833888	1.08(1-1.16)	0.044	1.04(1.01-1.06)	0.0084	1.07(1.04-1.09)	3.3e-08	6.1e-10	9.66e-10	+++
chr3	99716690	99716690	rs35521705	3_99716690_C_T	3_99723580_G_T	3	new	rs9833888	1.08(1-1.16)	0.044	1.04(1.01-1.06)	0.0084	1.07(1.04-1.09)	3.3e-08	6.1e-10	9.96e-10	+++
chr3	99723580	99723580	rs9833888	3_99723580_G_T	3_99723580_G_T	3	new	rs9833888	1.08(1-1.16)	0.044	1.04(1.01-1.06)	0.0084	1.07(1.04-1.09)	3.3e-08	6.1e-10	5.15e-10	+++
chr3	99724792	99724792	rs17379739	3_99724792_G_A	3_99723580_G_T	3	new	rs9833888	1.08(1-1.16)	0.044	1.04(1.01-1.06)	0.0084	1.07(1.04-1.09)	3.3e-08	6.1e-10	9.53e-10	+++
chr3	99724873	99724873	rs10511177	3_99724873_G_A	3_99723580_G_T	3	new	rs9833888	1.08(1-1.16)	0.044	1.04(1.01-1.06)	0.0084	1.07(1.04-1.09)	3.3e-08	6.1e-10	8.58e-10	+++
chr3	99728503	99728503	rs9832186	3_99728503_G_C	3_99723580_G_T	3	new	rs9833888	1.08(1-1.16)	0.044	1.04(1.01-1.06)	0.0084	1.07(1.04-1.09)	3.3e-08	6.1e-10	6.03e-10	+++
chr3	99729091	99729091	rs9875640	3_99729091_C_T	3_99723580_G_T	3	new	rs9833888	1.08(1-1.16)	0.044	1.04(1.01-1.06)	0.0084	1.07(1.04-1.09)	3.3e-08	6.1e-10	1.37e-09	+++
chr3	99729130	99729130	rs9875664	3_99729130_C_T	3_99723580_G_T	3	new	rs9833888	1.08(1-1.16)	0.044	1.04(1.01-1.06)	0.0084	1.07(1.04-1.09)	3.3e-08	6.1e-10	9.95e-10	+++
chr3	99729456	99729456	rs71625546	3_99729456_C_CT	3_99723580_G_T	3	new	rs9833888	1.08(1-1.16)	0.044	1.04(1.01-1.06)	0.0084	1.07(1.04-1.09)	3.3e-08	6.1e-10	1.73e-09	+++
chr3	99729565	99729565	rs201716811	3_99729565_TCTC_T	3_99723580_G_T	3	new	rs9833888	1.08(1-1.16)	0.044	1.04(1.01-1.06)	0.0084	1.07(1.04-1.09)	3.3e-08	6.1e-10	2.28e-08	+++
chr3	99732564	99732564	rs7610486	3_99732564_A_G	3_99723580_G_T	3	new	rs9833888	1.08(1-1.16)	0.044	1.04(1.01-1.06)	0.0084	1.07(1.04-1.09)	3.3e-08	6.1e-10	5.72e-10	+++
chr3	99733096	99733096	rs4279135	3_99733096_C_T	3_99723580_G_T	3	new	rs9833888	1.08(1-1.16)	0.044	1.04(1.01-1.06)	0.0084	1.07(1.04-1.09)	3.3e-08	6.1e-10	6.2e-10	+++
chr3	99736538	99736538	rs9810235	3_99736538_C_T	3_99723580_G_T	3	new	rs9833888	1.08(1-1.16)	0.044	1.04(1.01-1.06)	0.0084	1.07(1.04-1.09)	3.3e-08	6.1e-10	6.31e-10	+++
chr3	99738219	99738219	rs34996634	3_99738219_T_A	3_99723580_G_T	3	new	rs9833888	1.08(1-1.16)	0.044	1.04(1.01-1.06)	0.0084	1.07(1.04-1.09)	3.3e-08	6.1e-10	2.03e-08	+++
chr3	99738230	99738230	rs35154249	3_99738230_G_A	3_99723580_G_T	3	new	rs9833888	1.08(1-1.16)	0.044	1.04(1.01-1.06)	0.0084	1.07(1.04-1.09)	3.3e-08	6.1e-10	2.17e-08	+++
chr3	99739860	99739860	rs9853823	3_99739860_T_C	3_99723580_G_T	3	new	rs9833888	1.08(1-1.16)	0.044	1.04(1.01-1.06)	0.0084	1.07(1.04-1.09)	3.3e-08	6.1e-10	9.99e-10	+++
chr3	99747445	99747445	rs902159	3_99747445_C_T	3_99723580_G_T	3	new	rs9833888	1.08(1-1.16)	0.044	1.04(1.01-1.06)	0.0084	1.07(1.04-1.09)	3.3e-08	6.1e-10	4.95e-08	---
chr3	99748267	99748267	rs71625550	3_99748267_CTAAA_C	3_99723580_G_T	3	new	rs9833888	1.08(1-1.16)	0.044	1.04(1.01-1.06)	0.0084	1.07(1.04-1.09)	3.3e-08	6.1e-10	6.92e-10	+++
chr3	99748548	99748548	rs10049383	3_99748548_T_C	3_99723580_G_T	3	new	rs9833888	1.08(1-1.16)	0.044	1.04(1.01-1.06)	0.0084	1.07(1.04-1.09)	3.3e-08	6.1e-10	6.56e-10	+++
chr3	99752068	99752068	rs28714363	3_99752068_G_T	3_99723580_G_T	3	new	rs9833888	1.08(1-1.16)	0.044	1.04(1.01-1.06)	0.0084	1.07(1.04-1.09)	3.3e-08	6.1e-10	6.9e-10	+++
chr3	99754305	99754305	rs13093838	3_99754305_C_T	3_99723580_G_T	3	new	rs9833888	1.08(1-1.16)	0.044	1.04(1.01-1.06)	0.0084	1.07(1.04-1.09)	3.3e-08	6.1e-10	2.34e-08	+++
chr3	99754498	99754498	rs17392948	3_99754498_A_G	3_99723580_G_T	3	new	rs9833888	1.08(1-1.16)	0.044	1.04(1.01-1.06)	0.0084	1.07(1.04-1.09)	3.3e-08	6.1e-10	2.28e-08	+++
chr3	99756312	99756312	rs34626154	3_99756312_G_A	3_99723580_G_T	3	new	rs9833888	1.08(1-1.16)	0.044	1.04(1.01-1.06)	0.0084	1.07(1.04-1.09)	3.3e-08	6.1e-10	1.08e-09	+++
chr3	99756314	99756314	rs35701020	3_99756314_A_G	3_99723580_G_T	3	new	rs9833888	1.08(1-1.16)	0.044	1.04(1.01-1.06)	0.0084	1.07(1.04-1.09)	3.3e-08	6.1e-10	7.25e-10	+++
chr3	99757792	99757792	rs923470	3_99757792_G_A	3_99723580_G_T	3	new	rs9833888	1.08(1-1.16)	0.044	1.04(1.01-1.06)	0.0084	1.07(1.04-1.09)	3.3e-08	6.1e-10	7.48e-10	+++
chr3	99757853	99757853	rs923471	3_99757853_G_A	3_99723580_G_T	3	new	rs9833888	1.08(1-1.16)	0.044	1.04(1.01-1.06)	0.0084	1.07(1.04-1.09)	3.3e-08	6.1e-10	9.05e-10	+++
chr3	99760864	99760864	rs6807176	3_99760864_A_G	3_99723580_G_T	3	new	rs9833888	1.08(1-1.16)	0.044	1.04(1.01-1.06)	0.0084	1.07(1.04-1.09)	3.3e-08	6.1e-10	7.3e-09	+++
chr3	99761908	99761908	rs17393059	3_99761908_A_G	3_99723580_G_T	3	new	rs9833888	1.08(1-1.16)	0.044	1.04(1.01-1.06)	0.0084	1.07(1.04-1.09)	3.3e-08	6.1e-10	1.3e-09	+++
chr3	99762840	99762840	rs6799379	3_99762840_C_T	3_99723580_G_T	3	new	rs9833888	1.08(1-1.16)	0.044	1.04(1.01-1.06)	0.0084	1.07(1.04-1.09)	3.3e-08	6.1e-10	1.28e-09	+++
chr3	99764754	99764754	rs9864437	3_99764754_G_A	3_99723580_G_T	3	new	rs9833888	1.08(1-1.16)	0.044	1.04(1.01-1.06)	0.0084	1.07(1.04-1.09)	3.3e-08	6.1e-10	7.97e-10	+++
chr3	99766063	99766063	rs35669453	3_99766063_G_A	3_99723580_G_T	3	new	rs9833888	1.08(1-1.16)	0.044	1.04(1.01-1.06)	0.0084	1.07(1.04-1.09)	3.3e-08	6.1e-10	8.02e-10	+++
chr3	99767096	99767096	rs9833980	3_99767096_A_G	3_99723580_G_T	3	new	rs9833888	1.08(1-1.16)	0.044	1.04(1.01-1.06)	0.0084	1.07(1.04-1.09)	3.3e-08	6.1e-10	8.07e-10	+++
chr3	99767409	99767409	rs9851645	3_99767409_G_C	3_99723580_G_T	3	new	rs9833888	1.08(1-1.16)	0.044	1.04(1.01-1.06)	0.0084	1.07(1.04-1.09)	3.3e-08	6.1e-10	7.86e-10	+++
chr3	99767541	99767541	rs13064704	3_99767541_G_A	3_99723580_G_T	3	new	rs9833888	1.08(1-1.16)	0.044	1.04(1.01-1.06)	0.0084	1.07(1.04-1.09)	3.3e-08	6.1e-10	8.09e-10	+++
chr3	99767642	99767642	rs62285461	3_99767642_C_T	3_99723580_G_T	3	new	rs9833888	1.08(1-1.16)	0.044	1.04(1.01-1.06)	0.0084	1.07(1.04-1.09)	3.3e-08	6.1e-10	8.09e-10	+++
chr3	99769088	99769088	rs1489816	3_99769088_C_G	3_99723580_G_T	3	new	rs9833888	1.08(1-1.16)	0.044	1.04(1.01-1.06)	0.0084	1.07(1.04-1.09)	3.3e-08	6.1e-10	8.3e-10	+++
chr3	99769834	99769834	rs62285462	3_99769834_T_A	3_99723580_G_T	3	new	rs9833888	1.08(1-1.16)	0.044	1.04(1.01-1.06)	0.0084	1.07(1.04-1.09)	3.3e-08	6.1e-10	8.35e-10	+++
chr3	99770696	99770696	rs71313585	3_99770696_A_G	3_99723580_G_T	3	new	rs9833888	1.08(1-1.16)	0.044	1.04(1.01-1.06)	0.0084	1.07(1.04-1.09)	3.3e-08	6.1e-10	9.08e-10	+++
chr3	99773334	99773334	rs66559770	3_99773334_TTGTTA_T	3_99723580_G_T	3	new	rs9833888	1.08(1-1.16)	0.044	1.04(1.01-1.06)	0.0084	1.07(1.04-1.09)	3.3e-08	6.1e-10	1.04e-08	+++
chr3	99774720	99774720	rs6788750	3_99774720_T_G	3_99723580_G_T	3	new	rs9833888	1.08(1-1.16)	0.044	1.04(1.01-1.06)	0.0084	1.07(1.04-1.09)	3.3e-08	6.1e-10	1.92e-08	---
chr3	99775545	99775545	rs71299385	3_99775545_T_TA	3_99723580_G_T	3	new	rs9833888	1.08(1-1.16)	0.044	1.04(1.01-1.06)	0.0084	1.07(1.04-1.09)	3.3e-08	6.1e-10	4.52e-08	+++
chr3	99778655	99778655	rs6802422	3_99778655_T_C	3_99723580_G_T	3	new	rs9833888	1.08(1-1.16)	0.044	1.04(1.01-1.06)	0.0084	1.07(1.04-1.09)	3.3e-08	6.1e-10	9.6e-10	+++
chr3	99779658	99779658	rs6790877	3_99779658_C_T	3_99723580_G_T	3	new	rs9833888	1.08(1-1.16)	0.044	1.04(1.01-1.06)	0.0084	1.07(1.04-1.09)	3.3e-08	6.1e-10	9.6e-10	+++
chr3	99780393	99780393	rs6806178	3_99780393_A_C	3_99723580_G_T	3	new	rs9833888	1.08(1-1.16)	0.044	1.04(1.01-1.06)	0.0084	1.07(1.04-1.09)	3.3e-08	6.1e-10	1.59e-09	+++
chr3	99781805	99781805	rs2291494	3_99781805_G_A	3_99723580_G_T	3	new	rs9833888	1.08(1-1.16)	0.044	1.04(1.01-1.06)	0.0084	1.07(1.04-1.09)	3.3e-08	6.1e-10	9.79e-10	+++
chr3	99782227	99782227	rs2291495	3_99782227_T_G	3_99723580_G_T	3	new	rs9833888	1.08(1-1.16)	0.044	1.04(1.01-1.06)	0.0084	1.07(1.04-1.09)	3.3e-08	6.1e-10	9.85e-10	+++
chr3	99782575	99782575	rs11317963	3_99782575_GA_G	3_99723580_G_T	3	new	rs9833888	1.08(1-1.16)	0.044	1.04(1.01-1.06)	0.0084	1.07(1.04-1.09)	3.3e-08	6.1e-10	9.93e-10	+++
chr3	99785206	99785206	rs9815439	3_99785206_G_C	3_99723580_G_T	3	new	rs9833888	1.08(1-1.16)	0.044	1.04(1.01-1.06)	0.0084	1.07(1.04-1.09)	3.3e-08	6.1e-10	1.91e-09	+++
chr3	99786289	99786289	rs1021341	3_99786289_A_G	3_99723580_G_T	3	new	rs9833888	1.08(1-1.16)	0.044	1.04(1.01-1.06)	0.0084	1.07(1.04-1.09)	3.3e-08	6.1e-10	1.78e-09	+++
chr3	99787011	99787011	rs1017968	3_99787011_T_C	3_99723580_G_T	3	new	rs9833888	1.08(1-1.16)	0.044	1.04(1.01-1.06)	0.0084	1.07(1.04-1.09)	3.3e-08	6.1e-10	1.24e-09	+++
chr3	99790332	99790332	rs7620228	3_99790332_A_C	3_99723580_G_T	3	new	rs9833888	1.08(1-1.16)	0.044	1.04(1.01-1.06)	0.0084	1.07(1.04-1.09)	3.3e-08	6.1e-10	1.2e-09	+++
chr3	99793757	99793757	rs111501591	3_99793757_C_T	3_99723580_G_T	3	new	rs9833888	1.08(1-1.16)	0.044	1.04(1.01-1.06)	0.0084	1.07(1.04-1.09)	3.3e-08	6.1e-10	1.66e-08	---
chr3	99793904	99793904	rs34355464	3_99793904_TA_T	3_99723580_G_T	3	new	rs9833888	1.08(1-1.16)	0.044	1.04(1.01-1.06)	0.0084	1.07(1.04-1.09)	3.3e-08	6.1e-10	8.84e-10	+++
chr3	99794730	99794730	rs34922392	3_99794730_G_T	3_99723580_G_T	3	new	rs9833888	1.08(1-1.16)	0.044	1.04(1.01-1.06)	0.0084	1.07(1.04-1.09)	3.3e-08	6.1e-10	1.94e-09	+++
chr3	99794842	99794842	rs28503408	3_99794842_G_A	3_99723580_G_T	3	new	rs9833888	1.08(1-1.16)	0.044	1.04(1.01-1.06)	0.0084	1.07(1.04-1.09)	3.3e-08	6.1e-10	1.9e-09	+++
chr3	99795507	99795507	rs9823908	3_99795507_A_G	3_99723580_G_T	3	new	rs9833888	1.08(1-1.16)	0.044	1.04(1.01-1.06)	0.0084	1.07(1.04-1.09)	3.3e-08	6.1e-10	1.16e-09	+++
chr3	99795651	99795651	rs9841186	3_99795651_G_C	3_99723580_G_T	3	new	rs9833888	1.08(1-1.16)	0.044	1.04(1.01-1.06)	0.0084	1.07(1.04-1.09)	3.3e-08	6.1e-10	1.34e-09	+++
chr3	99796626	99796626	rs35844878	3_99796626_T_C	3_99723580_G_T	3	new	rs9833888	1.08(1-1.16)	0.044	1.04(1.01-1.06)	0.0084	1.07(1.04-1.09)	3.3e-08	6.1e-10	1.18e-09	+++
chr3	99797013	99797013	rs9814359	3_99797013_C_G	3_99723580_G_T	3	new	rs9833888	1.08(1-1.16)	0.044	1.04(1.01-1.06)	0.0084	1.07(1.04-1.09)	3.3e-08	6.1e-10	1.93e-09	+++
chr3	99799167	99799167	rs36071813	3_99799167_GA_G	3_99723580_G_T	3	new	rs9833888	1.08(1-1.16)	0.044	1.04(1.01-1.06)	0.0084	1.07(1.04-1.09)	3.3e-08	6.1e-10	1.55e-09	+++
chr3	99801628	99801628	rs13069311	3_99801628_A_C	3_99723580_G_T	3	new	rs9833888	1.08(1-1.16)	0.044	1.04(1.01-1.06)	0.0084	1.07(1.04-1.09)	3.3e-08	6.1e-10	1.16e-09	+++
chr3	99806645	99806645	rs9828079	3_99806645_A_G	3_99723580_G_T	3	new	rs9833888	1.08(1-1.16)	0.044	1.04(1.01-1.06)	0.0084	1.07(1.04-1.09)	3.3e-08	6.1e-10	1.08e-09	+++
chr3	99806949	99806949	rs62285471	3_99806949_A_G	3_99723580_G_T	3	new	rs9833888	1.08(1-1.16)	0.044	1.04(1.01-1.06)	0.0084	1.07(1.04-1.09)	3.3e-08	6.1e-10	1.08e-09	+++
chr3	99807735	99807735	rs6790535	3_99807735_G_A	3_99723580_G_T	3	new	rs9833888	1.08(1-1.16)	0.044	1.04(1.01-1.06)	0.0084	1.07(1.04-1.09)	3.3e-08	6.1e-10	1.66e-09	+++
chr3	99808338	99808338	rs7627991	3_99808338_A_G	3_99723580_G_T	3	new	rs9833888	1.08(1-1.16)	0.044	1.04(1.01-1.06)	0.0084	1.07(1.04-1.09)	3.3e-08	6.1e-10	1.1e-09	+++
chr3	99809955	99809955	rs62285473	3_99809955_C_T	3_99723580_G_T	3	new	rs9833888	1.08(1-1.16)	0.044	1.04(1.01-1.06)	0.0084	1.07(1.04-1.09)	3.3e-08	6.1e-10	1.21e-09	+++
chr3	99811553	99811553	rs13323143	3_99811553_T_C	3_99723580_G_T	3	new	rs9833888	1.08(1-1.16)	0.044	1.04(1.01-1.06)	0.0084	1.07(1.04-1.09)	3.3e-08	6.1e-10	2.14e-09	+++
chr3	99813218	99813218	rs35885423	3_99813218_C_G	3_99723580_G_T	3	new	rs9833888	1.08(1-1.16)	0.044	1.04(1.01-1.06)	0.0084	1.07(1.04-1.09)	3.3e-08	6.1e-10	1.18e-09	+++
chr3	99813622	99813622	rs28870092	3_99813622_G_A	3_99723580_G_T	3	new	rs9833888	1.08(1-1.16)	0.044	1.04(1.01-1.06)	0.0084	1.07(1.04-1.09)	3.3e-08	6.1e-10	3.26e-08	+++
chr3	99822135	99822135	rs62285478	3_99822135_C_T	3_99723580_G_T	3	new	rs9833888	1.08(1-1.16)	0.044	1.04(1.01-1.06)	0.0084	1.07(1.04-1.09)	3.3e-08	6.1e-10	1.22e-09	+++
chr3	99824685	99824685	rs9837602	3_99824685_G_A	3_99723580_G_T	3	new	rs9833888	1.08(1-1.16)	0.044	1.04(1.01-1.06)	0.0084	1.07(1.04-1.09)	3.3e-08	6.1e-10	1.2e-09	+++
chr3	99839106	99839106	rs9860290	3_99839106_G_A	3_99723580_G_T	3	new	rs9833888	1.08(1-1.16)	0.044	1.04(1.01-1.06)	0.0084	1.07(1.04-1.09)	3.3e-08	6.1e-10	4.3e-08	+++
chr3	99842140	99842140	rs13093776	3_99842140_C_T	3_99723580_G_T	3	new	rs9833888	1.08(1-1.16)	0.044	1.04(1.01-1.06)	0.0084	1.07(1.04-1.09)	3.3e-08	6.1e-10	5.39e-09	+++
chr3	141092050	141092050	rs4683603	3_141092050_G_T	3_141112859_CTT_C	3	new	rs34207738	1.01(0.95-1.08)	0.71	1.06(1.03-1.08)	1.7e-06	1.06(1.04-1.08)	4.4e-09	1.1e-13	7.06e-14	+++
chr3	141093285	141093285	rs7624084	3_141093285_T_C	3_141112859_CTT_C	3	new	rs34207738	1.01(0.95-1.08)	0.71	1.06(1.03-1.08)	1.7e-06	1.06(1.04-1.08)	4.4e-09	1.1e-13	6.51e-14	+++
chr3	141094209	141094209	rs6440003	3_141094209_G_A	3_141112859_CTT_C	3	new	rs34207738	1.01(0.95-1.08)	0.71	1.06(1.03-1.08)	1.7e-06	1.06(1.04-1.08)	4.4e-09	1.1e-13	1.38e-13	+++
chr3	141094769	141094769	rs4683605	3_141094769_C_A	3_141112859_CTT_C	3	new	rs34207738	1.01(0.95-1.08)	0.71	1.06(1.03-1.08)	1.7e-06	1.06(1.04-1.08)	4.4e-09	1.1e-13	2.22e-13	+++
chr3	141100280	141100280	rs6764769	3_141100280_A_G	3_141112859_CTT_C	3	new	rs34207738	1.01(0.95-1.08)	0.71	1.06(1.03-1.08)	1.7e-06	1.06(1.04-1.08)	4.4e-09	1.1e-13	7.37e-14	+++
chr3	141101961	141101961	rs9853018	3_141101961_C_T	3_141112859_CTT_C	3	new	rs34207738	1.01(0.95-1.08)	0.71	1.06(1.03-1.08)	1.7e-06	1.06(1.04-1.08)	4.4e-09	1.1e-13	8.13e-14	+++
chr3	141102833	141102833	rs6763931	3_141102833_G_A	3_141112859_CTT_C	3	new	rs34207738	1.01(0.95-1.08)	0.71	1.06(1.03-1.08)	1.7e-06	1.06(1.04-1.08)	4.4e-09	1.1e-13	1.16e-13	+++
chr3	141105570	141105570	rs724016	3_141105570_A_G	3_141112859_CTT_C	3	new	rs34207738	1.01(0.95-1.08)	0.71	1.06(1.03-1.08)	1.7e-06	1.06(1.04-1.08)	4.4e-09	1.1e-13	6.99e-14	+++
chr3	141106063	141106063	rs7632381	3_141106063_T_C	3_141112859_CTT_C	3	new	rs34207738	1.01(0.95-1.08)	0.71	1.06(1.03-1.08)	1.7e-06	1.06(1.04-1.08)	4.4e-09	1.1e-13	5.66e-14	+++
chr3	141106954	141106954	rs13077048	3_141106954_A_T	3_141112859_CTT_C	3	new	rs34207738	1.01(0.95-1.08)	0.71	1.06(1.03-1.08)	1.7e-06	1.06(1.04-1.08)	4.4e-09	1.1e-13	2.46e-13	+++
chr3	141109321	141109321	rs6808936	3_141109321_A_G	3_141112859_CTT_C	3	new	rs34207738	1.01(0.95-1.08)	0.71	1.06(1.03-1.08)	1.7e-06	1.06(1.04-1.08)	4.4e-09	1.1e-13	3.78e-14	+++
chr3	141109348	141109348	rs6785012	3_141109348_C_T	3_141112859_CTT_C	3	new	rs34207738	1.01(0.95-1.08)	0.71	1.06(1.03-1.08)	1.7e-06	1.06(1.04-1.08)	4.4e-09	1.1e-13	3.28e-14	+++
chr3	141110074	141110074	rs4683606	3_141110074_A_G	3_141112859_CTT_C	3	new	rs34207738	1.01(0.95-1.08)	0.71	1.06(1.03-1.08)	1.7e-06	1.06(1.04-1.08)	4.4e-09	1.1e-13	6.18e-14	+++
chr3	141112859	141112859	rs34207738	3_141112859_CTT_C	3_141112859_CTT_C	3	new	rs34207738	1.01(0.95-1.08)	0.71	1.06(1.03-1.08)	1.7e-06	1.06(1.04-1.08)	4.4e-09	1.1e-13	3.2e-15	+++
chr3	141115219	141115219	rs1582874	3_141115219_T_C	3_141112859_CTT_C	3	new	rs34207738	1.01(0.95-1.08)	0.71	1.06(1.03-1.08)	1.7e-06	1.06(1.04-1.08)	4.4e-09	1.1e-13	2.95e-14	+++
chr3	141118028	141118028	rs13068733	3_141118028_A_G	3_141112859_CTT_C	3	new	rs34207738	1.01(0.95-1.08)	0.71	1.06(1.03-1.08)	1.7e-06	1.06(1.04-1.08)	4.4e-09	1.1e-13	5.84e-14	+++
chr3	141121814	141121814	rs2871960	3_141121814_A_C	3_141112859_CTT_C	3	new	rs34207738	1.01(0.95-1.08)	0.71	1.06(1.03-1.08)	1.7e-06	1.06(1.04-1.08)	4.4e-09	1.1e-13	9.72e-14	+++
chr3	141125186	141125186	rs1344674	3_141125186_A_G	3_141112859_CTT_C	3	new	rs34207738	1.01(0.95-1.08)	0.71	1.06(1.03-1.08)	1.7e-06	1.06(1.04-1.08)	4.4e-09	1.1e-13	7.39e-14	+++
chr3	141125705	141125705	rs1344672	3_141125705_C_G	3_141112859_CTT_C	3	new	rs34207738	1.01(0.95-1.08)	0.71	1.06(1.03-1.08)	1.7e-06	1.06(1.04-1.08)	4.4e-09	1.1e-13	7.87e-14	+++
chr3	141133450	141133450	rs1991431	3_141133450_G_A	3_141112859_CTT_C	3	new	rs34207738	1.01(0.95-1.08)	0.71	1.06(1.03-1.08)	1.7e-06	1.06(1.04-1.08)	4.4e-09	1.1e-13	7.52e-14	+++
chr3	141140366	141140366	rs6763927	3_141140366_A_T	3_141112859_CTT_C	3	new	rs34207738	1.01(0.95-1.08)	0.71	1.06(1.03-1.08)	1.7e-06	1.06(1.04-1.08)	4.4e-09	1.1e-13	7.72e-14	+++
chr3	141140968	141140968	rs9846396	3_141140968_C_T	3_141112859_CTT_C	3	new	rs34207738	1.01(0.95-1.08)	0.71	1.06(1.03-1.08)	1.7e-06	1.06(1.04-1.08)	4.4e-09	1.1e-13	2.88e-14	+++
chr3	141142691	141142691	rs6440006	3_141142691_G_A	3_141112859_CTT_C	3	new	rs34207738	1.01(0.95-1.08)	0.71	1.06(1.03-1.08)	1.7e-06	1.06(1.04-1.08)	4.4e-09	1.1e-13	1.73e-14	+++
chr3	141147414	141147414	rs7650602	3_141147414_T_C	3_141112859_CTT_C	3	new	rs34207738	1.01(0.95-1.08)	0.71	1.06(1.03-1.08)	1.7e-06	1.06(1.04-1.08)	4.4e-09	1.1e-13	6.22e-15	+++
chr3	141150026	141150026	rs7625643	3_141150026_A_G	3_141112859_CTT_C	3	new	rs34207738	1.01(0.95-1.08)	0.71	1.06(1.03-1.08)	1.7e-06	1.06(1.04-1.08)	4.4e-09	1.1e-13	9.96e-15	+++
chr3	172272846	172272846	rs3850172	3_172272846_C_A	3_172285237_G_A	3	new	rs58058861	1.04(0.97-1.12)	0.23	1.03(1.01-1.06)	0.015	1.07(1.04-1.1)	3.3e-08	4.8e-09	1.17e-08	+++
chr3	172273004	172273004	rs3850173	3_172273004_G_T	3_172285237_G_A	3	new	rs58058861	1.04(0.97-1.12)	0.23	1.03(1.01-1.06)	0.015	1.07(1.04-1.1)	3.3e-08	4.8e-09	1.17e-08	+++
chr3	172274155	172274155	rs62282635	3_172274155_C_T	3_172285237_G_A	3	new	rs58058861	1.04(0.97-1.12)	0.23	1.03(1.01-1.06)	0.015	1.07(1.04-1.1)	3.3e-08	4.8e-09	3.66e-09	+++
chr3	172275896	172275896	rs16845834	3_172275896_G_A	3_172285237_G_A	3	new	rs58058861	1.04(0.97-1.12)	0.23	1.03(1.01-1.06)	0.015	1.07(1.04-1.1)	3.3e-08	4.8e-09	4.62e-09	+++
chr3	172277813	172277813	rs75575928	3_172277813_C_T	3_172285237_G_A	3	new	rs58058861	1.04(0.97-1.12)	0.23	1.03(1.01-1.06)	0.015	1.07(1.04-1.1)	3.3e-08	4.8e-09	1.15e-09	+++
chr3	172278112	172278112	rs78105464	3_172278112_GA_G	3_172285237_G_A	3	new	rs58058861	1.04(0.97-1.12)	0.23	1.03(1.01-1.06)	0.015	1.07(1.04-1.1)	3.3e-08	4.8e-09	3.44e-10	+++
chr3	172279026	172279026	rs60869157	3_172279026_T_C	3_172285237_G_A	3	new	rs58058861	1.04(0.97-1.12)	0.23	1.03(1.01-1.06)	0.015	1.07(1.04-1.1)	3.3e-08	4.8e-09	1.01e-09	+++
chr3	172280603	172280603	rs11310639	3_172280603_GT_G	3_172285237_G_A	3	new	rs58058861	1.04(0.97-1.12)	0.23	1.03(1.01-1.06)	0.015	1.07(1.04-1.1)	3.3e-08	4.8e-09	6.35e-09	+++
chr3	172280754	172280754	rs11385857	3_172280754_A_AG	3_172285237_G_A	3	new	rs58058861	1.04(0.97-1.12)	0.23	1.03(1.01-1.06)	0.015	1.07(1.04-1.1)	3.3e-08	4.8e-09	1.24e-09	+++
chr3	172280778	172280778	rs10674828	3_172280778_G_GAGAC	3_172285237_G_A	3	new	rs58058861	1.04(0.97-1.12)	0.23	1.03(1.01-1.06)	0.015	1.07(1.04-1.1)	3.3e-08	4.8e-09	1.29e-09	+++
chr3	172281285	172281285	rs6445068	3_172281285_G_A	3_172285237_G_A	3	new	rs58058861	1.04(0.97-1.12)	0.23	1.03(1.01-1.06)	0.015	1.07(1.04-1.1)	3.3e-08	4.8e-09	1.07e-09	+++
chr3	172281430	172281430	rs9868605	3_172281430_T_C	3_172285237_G_A	3	new	rs58058861	1.04(0.97-1.12)	0.23	1.03(1.01-1.06)	0.015	1.07(1.04-1.1)	3.3e-08	4.8e-09	2.28e-10	+++
chr3	172283173	172283173	rs4894562	3_172283173_G_A	3_172285237_G_A	3	new	rs58058861	1.04(0.97-1.12)	0.23	1.03(1.01-1.06)	0.015	1.07(1.04-1.1)	3.3e-08	4.8e-09	2.06e-10	+++
chr3	172283638	172283638	rs10433357	3_172283638_A_C	3_172285237_G_A	3	new	rs58058861	1.04(0.97-1.12)	0.23	1.03(1.01-1.06)	0.015	1.07(1.04-1.1)	3.3e-08	4.8e-09	1.04e-09	+++
chr3	172283761	172283761	rs62282637	3_172283761_C_A	3_172285237_G_A	3	new	rs58058861	1.04(0.97-1.12)	0.23	1.03(1.01-1.06)	0.015	1.07(1.04-1.1)	3.3e-08	4.8e-09	1.05e-09	+++
chr3	172284444	172284444	rs59117326	3_172284444_T_C	3_172285237_G_A	3	new	rs58058861	1.04(0.97-1.12)	0.23	1.03(1.01-1.06)	0.015	1.07(1.04-1.1)	3.3e-08	4.8e-09	1.02e-09	+++
chr3	172285159	172285159	rs73031214	3_172285159_C_T	3_172285237_G_A	3	new	rs58058861	1.04(0.97-1.12)	0.23	1.03(1.01-1.06)	0.015	1.07(1.04-1.1)	3.3e-08	4.8e-09	1.91e-10	+++
chr3	172285237	172285237	rs58058861	3_172285237_G_A	3_172285237_G_A	3	new	rs58058861	1.04(0.97-1.12)	0.23	1.03(1.01-1.06)	0.015	1.07(1.04-1.1)	3.3e-08	4.8e-09	1.91e-10	+++
chr3	172287333	172287333	rs7612034	3_172287333_A_G	3_172285237_G_A	3	new	rs58058861	1.04(0.97-1.12)	0.23	1.03(1.01-1.06)	0.015	1.07(1.04-1.1)	3.3e-08	4.8e-09	5.48e-09	+++
chr3	172287850	172287850	rs6781084	3_172287850_A_G	3_172285237_G_A	3	new	rs58058861	1.04(0.97-1.12)	0.23	1.03(1.01-1.06)	0.015	1.07(1.04-1.1)	3.3e-08	4.8e-09	4.31e-09	+++
chr3	172288163	172288163	rs6784073	3_172288163_T_G	3_172285237_G_A	3	new	rs58058861	1.04(0.97-1.12)	0.23	1.03(1.01-1.06)	0.015	1.07(1.04-1.1)	3.3e-08	4.8e-09	5.67e-09	+++
chr3	172292484	172292484	rs2286983	3_172292484_G_A	3_172285237_G_A	3	new	rs58058861	1.04(0.97-1.12)	0.23	1.03(1.01-1.06)	0.015	1.07(1.04-1.1)	3.3e-08	4.8e-09	1.03e-09	+++
chr3	172293113	172293113	rs9809070	3_172293113_G_A	3_172285237_G_A	3	new	rs58058861	1.04(0.97-1.12)	0.23	1.03(1.01-1.06)	0.015	1.07(1.04-1.1)	3.3e-08	4.8e-09	2.99e-10	+++
chr3	172294031	172294031	rs60030089	3_172294031_C_T	3_172285237_G_A	3	new	rs58058861	1.04(0.97-1.12)	0.23	1.03(1.01-1.06)	0.015	1.07(1.04-1.1)	3.3e-08	4.8e-09	3.23e-09	+++
chr4	38784267	38784267	rs28393318	4_38784267_A_G	4_38816338_A_C	4	new	rs6815814	1.05(0.98-1.13)	0.15	1.06(1.04-1.09)	5.2e-06	1.05(1.03-1.08)	1.8e-05	1.6e-10	2.98e-12	+++
chr4	38784633	38784633	rs10012017	4_38784633_G_T	4_38816338_A_C	4	new	rs6815814	1.05(0.98-1.13)	0.15	1.06(1.04-1.09)	5.2e-06	1.05(1.03-1.08)	1.8e-05	1.6e-10	1.87e-12	+++
chr4	38784678	38784678	rs10034903	4_38784678_C_G	4_38816338_A_C	4	new	rs6815814	1.05(0.98-1.13)	0.15	1.06(1.04-1.09)	5.2e-06	1.05(1.03-1.08)	1.8e-05	1.6e-10	2.21e-12	+++
chr4	38784724	38784724	rs10004195	4_38784724_T_A	4_38816338_A_C	4	new	rs6815814	1.05(0.98-1.13)	0.15	1.06(1.04-1.09)	5.2e-06	1.05(1.03-1.08)	1.8e-05	1.6e-10	1.09e-11	+++
chr4	38785697	38785697	rs73142654	4_38785697_T_A	4_38816338_A_C	4	new	rs6815814	1.05(0.98-1.13)	0.15	1.06(1.04-1.09)	5.2e-06	1.05(1.03-1.08)	1.8e-05	1.6e-10	2.1e-12	+++
chr4	38786002	38786002	rs7658651	4_38786002_A_C	4_38816338_A_C	4	new	rs6815814	1.05(0.98-1.13)	0.15	1.06(1.04-1.09)	5.2e-06	1.05(1.03-1.08)	1.8e-05	1.6e-10	2.46e-12	+++
chr4	38786304	38786304	rs7664239	4_38786304_T_C	4_38816338_A_C	4	new	rs6815814	1.05(0.98-1.13)	0.15	1.06(1.04-1.09)	5.2e-06	1.05(1.03-1.08)	1.8e-05	1.6e-10	2.84e-12	+++
chr4	38787216	38787216	rs12233670	4_38787216_C_T	4_38816338_A_C	4	new	rs6815814	1.05(0.98-1.13)	0.15	1.06(1.04-1.09)	5.2e-06	1.05(1.03-1.08)	1.8e-05	1.6e-10	2.2e-12	+++
chr4	38788234	38788234	rs6834581	4_38788234_T_C	4_38816338_A_C	4	new	rs6815814	1.05(0.98-1.13)	0.15	1.06(1.04-1.09)	5.2e-06	1.05(1.03-1.08)	1.8e-05	1.6e-10	3.21e-12	+++
chr4	38789072	38789072	rs35005076	4_38789072_G_GC	4_38816338_A_C	4	new	rs6815814	1.05(0.98-1.13)	0.15	1.06(1.04-1.09)	5.2e-06	1.05(1.03-1.08)	1.8e-05	1.6e-10	3.36e-12	+++
chr4	38789132	38789132	rs28690449	4_38789132_C_T	4_38816338_A_C	4	new	rs6815814	1.05(0.98-1.13)	0.15	1.06(1.04-1.09)	5.2e-06	1.05(1.03-1.08)	1.8e-05	1.6e-10	2.58e-12	+++
chr4	38789361	38789361	rs1135430	4_38789361_T_C	4_38816338_A_C	4	new	rs6815814	1.05(0.98-1.13)	0.15	1.06(1.04-1.09)	5.2e-06	1.05(1.03-1.08)	1.8e-05	1.6e-10	4.58e-12	+++
chr4	38789524	38789524	rs11936050	4_38789524_C_T	4_38816338_A_C	4	new	rs6815814	1.05(0.98-1.13)	0.15	1.06(1.04-1.09)	5.2e-06	1.05(1.03-1.08)	1.8e-05	1.6e-10	2.66e-12	+++
chr4	38789740	38789740	rs4833093	4_38789740_G_T	4_38816338_A_C	4	new	rs6815814	1.05(0.98-1.13)	0.15	1.06(1.04-1.09)	5.2e-06	1.05(1.03-1.08)	1.8e-05	1.6e-10	2.13e-12	+++
chr4	38792340	38792340	rs6531663	4_38792340_T_C	4_38816338_A_C	4	new	rs6815814	1.05(0.98-1.13)	0.15	1.06(1.04-1.09)	5.2e-06	1.05(1.03-1.08)	1.8e-05	1.6e-10	3.86e-12	+++
chr4	38792524	38792524	rs4543123	4_38792524_A_G	4_38816338_A_C	4	new	rs6815814	1.05(0.98-1.13)	0.15	1.06(1.04-1.09)	5.2e-06	1.05(1.03-1.08)	1.8e-05	1.6e-10	2.52e-11	+++
chr4	38798648	38798648	rs5743618	4_38798648_C_A	4_38816338_A_C	4	new	rs6815814	1.05(0.98-1.13)	0.15	1.06(1.04-1.09)	5.2e-06	1.05(1.03-1.08)	1.8e-05	1.6e-10	2.57e-12	+++
chr4	38798935	38798935	rs5743614	4_38798935_C_T	4_38816338_A_C	4	new	rs6815814	1.05(0.98-1.13)	0.15	1.06(1.04-1.09)	5.2e-06	1.05(1.03-1.08)	1.8e-05	1.6e-10	1.32e-11	+++
chr4	38799710	38799710	rs4833095	4_38799710_T_C	4_38816338_A_C	4	new	rs6815814	1.05(0.98-1.13)	0.15	1.06(1.04-1.09)	5.2e-06	1.05(1.03-1.08)	1.8e-05	1.6e-10	1.43e-11	+++
chr4	38807654	38807654	rs5743551	4_38807654_T_C	4_38816338_A_C	4	new	rs6815814	1.05(0.98-1.13)	0.15	1.06(1.04-1.09)	5.2e-06	1.05(1.03-1.08)	1.8e-05	1.6e-10	5.51e-12	+++
chr4	38807911	38807911	rs9306967	4_38807911_G_C	4_38816338_A_C	4	new	rs6815814	1.05(0.98-1.13)	0.15	1.06(1.04-1.09)	5.2e-06	1.05(1.03-1.08)	1.8e-05	1.6e-10	3.03e-11	+++
chr4	38808632	38808632	rs4833096	4_38808632_T_C	4_38816338_A_C	4	new	rs6815814	1.05(0.98-1.13)	0.15	1.06(1.04-1.09)	5.2e-06	1.05(1.03-1.08)	1.8e-05	1.6e-10	2.55e-11	+++
chr4	38808680	38808680	rs4833097	4_38808680_T_C	4_38816338_A_C	4	new	rs6815814	1.05(0.98-1.13)	0.15	1.06(1.04-1.09)	5.2e-06	1.05(1.03-1.08)	1.8e-05	1.6e-10	3.01e-12	+++
chr4	38808829	38808829	rs7378375	4_38808829_T_C	4_38816338_A_C	4	new	rs6815814	1.05(0.98-1.13)	0.15	1.06(1.04-1.09)	5.2e-06	1.05(1.03-1.08)	1.8e-05	1.6e-10	3.22e-11	+++
chr4	38809368	38809368	rs186390355	4_38809368_T_C	4_38816338_A_C	4	new	rs6815814	1.05(0.98-1.13)	0.15	1.06(1.04-1.09)	5.2e-06	1.05(1.03-1.08)	1.8e-05	1.6e-10	1.2e-11	+++
chr4	38810132	38810132	rs4833100	4_38810132_A_C	4_38816338_A_C	4	new	rs6815814	1.05(0.98-1.13)	0.15	1.06(1.04-1.09)	5.2e-06	1.05(1.03-1.08)	1.8e-05	1.6e-10	5.09e-12	+++
chr4	38810169	38810169	rs4833101	4_38810169_A_G	4_38816338_A_C	4	new	rs6815814	1.05(0.98-1.13)	0.15	1.06(1.04-1.09)	5.2e-06	1.05(1.03-1.08)	1.8e-05	1.6e-10	2.3e-11	+++
chr4	38811551	38811551	rs2101521	4_38811551_G_A	4_38816338_A_C	4	new	rs6815814	1.05(0.98-1.13)	0.15	1.06(1.04-1.09)	5.2e-06	1.05(1.03-1.08)	1.8e-05	1.6e-10	1.93e-11	+++
chr4	38812876	38812876	rs17616434	4_38812876_T_C	4_38816338_A_C	4	new	rs6815814	1.05(0.98-1.13)	0.15	1.06(1.04-1.09)	5.2e-06	1.05(1.03-1.08)	1.8e-05	1.6e-10	1.45e-12	+++
chr4	38816338	38816338	rs6815814	4_38816338_A_C	4_38816338_A_C	4	new	rs6815814	1.05(0.98-1.13)	0.15	1.06(1.04-1.09)	5.2e-06	1.05(1.03-1.08)	1.8e-05	1.6e-10	6.13e-13	+++
chr4	84351153	84351153	rs4235062	4_84351153_G_A	4_84370124_TAA_TA	4	new	4:84370124	1.02(0.94-1.11)	0.62	1.05(1.03-1.08)	1.5e-05	1.04(1.01-1.06)	0.00095	9.2e-08	5.16e-08	---
chr4	84357126	84357126	rs5859872	4_84357126_CA_C	4_84370124_TAA_TA	4	new	4:84370124	1.02(0.94-1.11)	0.62	1.05(1.03-1.08)	1.5e-05	1.04(1.01-1.06)	0.00095	9.2e-08	5.99e-09	---
chr4	84364808	84364808	rs6535473	4_84364808_T_C	4_84370124_TAA_TA	4	new	4:84370124	1.02(0.94-1.11)	0.62	1.05(1.03-1.08)	1.5e-05	1.04(1.01-1.06)	0.00095	9.2e-08	6.55e-09	---
chr4	84367050	84367050	rs11099599	4_84367050_G_A	4_84370124_TAA_TA	4	new	4:84370124	1.02(0.94-1.11)	0.62	1.05(1.03-1.08)	1.5e-05	1.04(1.01-1.06)	0.00095	9.2e-08	5.16e-09	---
chr4	84367286	84367286	rs11099600	4_84367286_G_A	4_84370124_TAA_TA	4	new	4:84370124	1.02(0.94-1.11)	0.62	1.05(1.03-1.08)	1.5e-05	1.04(1.01-1.06)	0.00095	9.2e-08	6.47e-09	---
chr4	84367467	84367467	rs35146359	4_84367467_AT_A	4_84370124_TAA_TA	4	new	4:84370124	1.02(0.94-1.11)	0.62	1.05(1.03-1.08)	1.5e-05	1.04(1.01-1.06)	0.00095	9.2e-08	6.28e-09	---
chr4	84367605	84367605	rs12651246	4_84367605_G_A	4_84370124_TAA_TA	4	new	4:84370124	1.02(0.94-1.11)	0.62	1.05(1.03-1.08)	1.5e-05	1.04(1.01-1.06)	0.00095	9.2e-08	4.81e-09	---
chr4	84367759	84367759	rs6854739	4_84367759_A_T	4_84370124_TAA_TA	4	new	4:84370124	1.02(0.94-1.11)	0.62	1.05(1.03-1.08)	1.5e-05	1.04(1.01-1.06)	0.00095	9.2e-08	5.39e-09	---
chr4	84368225	84368225	rs67003132	4_84368225_GCATTGTGGCCAATGCCTGTAATCC_G	4_84370124_TAA_TA	4	new	4:84370124	1.02(0.94-1.11)	0.62	1.05(1.03-1.08)	1.5e-05	1.04(1.01-1.06)	0.00095	9.2e-08	7.07e-09	---
chr4	84370124	84370124	4:84370124	4_84370124_TAA_TA	4_84370124_TAA_TA	4	new	4:84370124	1.02(0.94-1.11)	0.62	1.05(1.03-1.08)	1.5e-05	1.04(1.01-1.06)	0.00095	9.2e-08	2.18e-09	---
chr4	84372203	84372203	rs6858218	4_84372203_C_T	4_84370124_TAA_TA	4	new	4:84370124	1.02(0.94-1.11)	0.62	1.05(1.03-1.08)	1.5e-05	1.04(1.01-1.06)	0.00095	9.2e-08	7.16e-09	---
chr4	84373622	84373622	rs4693089	4_84373622_A_G	4_84370124_TAA_TA	4	new	4:84370124	1.02(0.94-1.11)	0.62	1.05(1.03-1.08)	1.5e-05	1.04(1.01-1.06)	0.00095	9.2e-08	7.26e-09	---
chr4	84374480	84374480	rs1494961	4_84374480_C_T	4_84370124_TAA_TA	4	new	4:84370124	1.02(0.94-1.11)	0.62	1.05(1.03-1.08)	1.5e-05	1.04(1.01-1.06)	0.00095	9.2e-08	7.4e-09	---
chr4	84375734	84375734	rs6535477	4_84375734_G_A	4_84370124_TAA_TA	4	new	4:84370124	1.02(0.94-1.11)	0.62	1.05(1.03-1.08)	1.5e-05	1.04(1.01-1.06)	0.00095	9.2e-08	6.18e-09	---
chr4	84380378	84380378	rs11449455	4_84380378_G_GA	4_84370124_TAA_TA	4	new	4:84370124	1.02(0.94-1.11)	0.62	1.05(1.03-1.08)	1.5e-05	1.04(1.01-1.06)	0.00095	9.2e-08	9.08e-09	---
chr4	84381316	84381316	rs36014997	4_84381316_C_CT	4_84370124_TAA_TA	4	new	4:84370124	1.02(0.94-1.11)	0.62	1.05(1.03-1.08)	1.5e-05	1.04(1.01-1.06)	0.00095	9.2e-08	1.13e-07	---
chr4	84381497	84381497	rs13142756	4_84381497_T_G	4_84370124_TAA_TA	4	new	4:84370124	1.02(0.94-1.11)	0.62	1.05(1.03-1.08)	1.5e-05	1.04(1.01-1.06)	0.00095	9.2e-08	4.56e-09	---
chr4	84382763	84382763	rs11099601	4_84382763_C_T	4_84370124_TAA_TA	4	new	4:84370124	1.02(0.94-1.11)	0.62	1.05(1.03-1.08)	1.5e-05	1.04(1.01-1.06)	0.00095	9.2e-08	6.32e-09	---
chr4	84386438	84386438	rs6838225	4_84386438_C_G	4_84370124_TAA_TA	4	new	4:84370124	1.02(0.94-1.11)	0.62	1.05(1.03-1.08)	1.5e-05	1.04(1.01-1.06)	0.00095	9.2e-08	5.91e-09	---
chr4	84393475	84393475	rs6535478	4_84393475_C_T	4_84370124_TAA_TA	4	new	4:84370124	1.02(0.94-1.11)	0.62	1.05(1.03-1.08)	1.5e-05	1.04(1.01-1.06)	0.00095	9.2e-08	6.57e-09	---
chr4	84394682	84394682	rs34803094	4_84394682_T_C	4_84370124_TAA_TA	4	new	4:84370124	1.02(0.94-1.11)	0.62	1.05(1.03-1.08)	1.5e-05	1.04(1.01-1.06)	0.00095	9.2e-08	2.01e-07	+++
chr4	84395641	84395641	rs4693090	4_84395641_T_C	4_84370124_TAA_TA	4	new	4:84370124	1.02(0.94-1.11)	0.62	1.05(1.03-1.08)	1.5e-05	1.04(1.01-1.06)	0.00095	9.2e-08	9.71e-09	---
chr4	84397133	84397133	rs7666601	4_84397133_C_T	4_84370124_TAA_TA	4	new	4:84370124	1.02(0.94-1.11)	0.62	1.05(1.03-1.08)	1.5e-05	1.04(1.01-1.06)	0.00095	9.2e-08	7.93e-09	---
chr4	84397620	84397620	rs17352824	4_84397620_G_A	4_84370124_TAA_TA	4	new	4:84370124	1.02(0.94-1.11)	0.62	1.05(1.03-1.08)	1.5e-05	1.04(1.01-1.06)	0.00095	9.2e-08	7.93e-09	---
chr4	84398990	84398990	rs12649417	4_84398990_A_T	4_84370124_TAA_TA	4	new	4:84370124	1.02(0.94-1.11)	0.62	1.05(1.03-1.08)	1.5e-05	1.04(1.01-1.06)	0.00095	9.2e-08	7.76e-09	---
chr4	84400330	84400330	rs1565909	4_84400330_C_T	4_84370124_TAA_TA	4	new	4:84370124	1.02(0.94-1.11)	0.62	1.05(1.03-1.08)	1.5e-05	1.04(1.01-1.06)	0.00095	9.2e-08	6.58e-09	---
chr4	84402043	84402043	rs6834006	4_84402043_A_G	4_84370124_TAA_TA	4	new	4:84370124	1.02(0.94-1.11)	0.62	1.05(1.03-1.08)	1.5e-05	1.04(1.01-1.06)	0.00095	9.2e-08	1.03e-08	---
chr4	84403491	84403491	rs35608460	4_84403491_A_AG	4_84370124_TAA_TA	4	new	4:84370124	1.02(0.94-1.11)	0.62	1.05(1.03-1.08)	1.5e-05	1.04(1.01-1.06)	0.00095	9.2e-08	1.59e-08	---
chr4	84405745	84405745	rs6844460	4_84405745_T_C	4_84370124_TAA_TA	4	new	4:84370124	1.02(0.94-1.11)	0.62	1.05(1.03-1.08)	1.5e-05	1.04(1.01-1.06)	0.00095	9.2e-08	3.52e-09	---
chr4	84411233	84411233	rs7691492	4_84411233_C_T	4_84370124_TAA_TA	4	new	4:84370124	1.02(0.94-1.11)	0.62	1.05(1.03-1.08)	1.5e-05	1.04(1.01-1.06)	0.00095	9.2e-08	7.6e-09	+++
chr4	84412439	84412439	rs35000866	4_84412439_C_G	4_84370124_TAA_TA	4	new	4:84370124	1.02(0.94-1.11)	0.62	1.05(1.03-1.08)	1.5e-05	1.04(1.01-1.06)	0.00095	9.2e-08	6.66e-09	+++
chr4	84412755	84412755	rs10027007	4_84412755_C_T	4_84370124_TAA_TA	4	new	4:84370124	1.02(0.94-1.11)	0.62	1.05(1.03-1.08)	1.5e-05	1.04(1.01-1.06)	0.00095	9.2e-08	6.6e-09	+++
chr4	84412918	84412918	rs568978	4_84412918_A_C	4_84370124_TAA_TA	4	new	4:84370124	1.02(0.94-1.11)	0.62	1.05(1.03-1.08)	1.5e-05	1.04(1.01-1.06)	0.00095	9.2e-08	5.81e-09	+++
chr4	84413243	84413243	rs562723	4_84413243_C_T	4_84370124_TAA_TA	4	new	4:84370124	1.02(0.94-1.11)	0.62	1.05(1.03-1.08)	1.5e-05	1.04(1.01-1.06)	0.00095	9.2e-08	5.84e-09	+++
chr4	84413400	84413400	rs543318	4_84413400_C_G	4_84370124_TAA_TA	4	new	4:84370124	1.02(0.94-1.11)	0.62	1.05(1.03-1.08)	1.5e-05	1.04(1.01-1.06)	0.00095	9.2e-08	5.93e-09	+++
chr4	84413512	84413512	rs13139169	4_84413512_G_A	4_84370124_TAA_TA	4	new	4:84370124	1.02(0.94-1.11)	0.62	1.05(1.03-1.08)	1.5e-05	1.04(1.01-1.06)	0.00095	9.2e-08	6.86e-09	+++
chr4	84413735	84413735	rs11727406	4_84413735_G_A	4_84370124_TAA_TA	4	new	4:84370124	1.02(0.94-1.11)	0.62	1.05(1.03-1.08)	1.5e-05	1.04(1.01-1.06)	0.00095	9.2e-08	6.93e-09	+++
chr4	84413946	84413946	rs538078	4_84413946_A_G	4_84370124_TAA_TA	4	new	4:84370124	1.02(0.94-1.11)	0.62	1.05(1.03-1.08)	1.5e-05	1.04(1.01-1.06)	0.00095	9.2e-08	6.74e-09	+++
chr4	84414043	84414043	rs59644543	4_84414043_AT_A	4_84370124_TAA_TA	4	new	4:84370124	1.02(0.94-1.11)	0.62	1.05(1.03-1.08)	1.5e-05	1.04(1.01-1.06)	0.00095	9.2e-08	1.03e-08	+++
chr4	84414066	84414066	rs555348	4_84414066_A_G	4_84370124_TAA_TA	4	new	4:84370124	1.02(0.94-1.11)	0.62	1.05(1.03-1.08)	1.5e-05	1.04(1.01-1.06)	0.00095	9.2e-08	6.02e-09	+++
chr4	84414282	84414282	rs28488925	4_84414282_C_T	4_84370124_TAA_TA	4	new	4:84370124	1.02(0.94-1.11)	0.62	1.05(1.03-1.08)	1.5e-05	1.04(1.01-1.06)	0.00095	9.2e-08	7.03e-09	+++
chr4	84415003	84415003	rs13129676	4_84415003_T_C	4_84370124_TAA_TA	4	new	4:84370124	1.02(0.94-1.11)	0.62	1.05(1.03-1.08)	1.5e-05	1.04(1.01-1.06)	0.00095	9.2e-08	6.25e-09	+++
chr4	84415251	84415251	rs28869016	4_84415251_A_G	4_84370124_TAA_TA	4	new	4:84370124	1.02(0.94-1.11)	0.62	1.05(1.03-1.08)	1.5e-05	1.04(1.01-1.06)	0.00095	9.2e-08	4.01e-09	+++
chr4	84415273	84415273	rs10033600	4_84415273_C_T	4_84370124_TAA_TA	4	new	4:84370124	1.02(0.94-1.11)	0.62	1.05(1.03-1.08)	1.5e-05	1.04(1.01-1.06)	0.00095	9.2e-08	3.48e-09	+++
chr4	84417762	84417762	rs526064	4_84417762_T_C	4_84370124_TAA_TA	4	new	4:84370124	1.02(0.94-1.11)	0.62	1.05(1.03-1.08)	1.5e-05	1.04(1.01-1.06)	0.00095	9.2e-08	4.72e-09	+++
chr4	84417935	84417935	rs813298	4_84417935_A_G	4_84370124_TAA_TA	4	new	4:84370124	1.02(0.94-1.11)	0.62	1.05(1.03-1.08)	1.5e-05	1.04(1.01-1.06)	0.00095	9.2e-08	4.63e-09	+++
chr4	84418326	84418326	rs9997925	4_84418326_T_C	4_84370124_TAA_TA	4	new	4:84370124	1.02(0.94-1.11)	0.62	1.05(1.03-1.08)	1.5e-05	1.04(1.01-1.06)	0.00095	9.2e-08	5.22e-09	+++
chr4	84419143	84419143	rs9284657	4_84419143_C_G	4_84370124_TAA_TA	4	new	4:84370124	1.02(0.94-1.11)	0.62	1.05(1.03-1.08)	1.5e-05	1.04(1.01-1.06)	0.00095	9.2e-08	3.36e-09	+++
chr4	84420780	84420780	rs2177034	4_84420780_T_C	4_84370124_TAA_TA	4	new	4:84370124	1.02(0.94-1.11)	0.62	1.05(1.03-1.08)	1.5e-05	1.04(1.01-1.06)	0.00095	9.2e-08	6.43e-09	+++
chr4	84421354	84421354	rs10213169	4_84421354_G_A	4_84370124_TAA_TA	4	new	4:84370124	1.02(0.94-1.11)	0.62	1.05(1.03-1.08)	1.5e-05	1.04(1.01-1.06)	0.00095	9.2e-08	6.9e-09	+++
chr4	84421785	84421785	rs28785823	4_84421785_C_T	4_84370124_TAA_TA	4	new	4:84370124	1.02(0.94-1.11)	0.62	1.05(1.03-1.08)	1.5e-05	1.04(1.01-1.06)	0.00095	9.2e-08	9.32e-09	+++
chr4	84421869	84421869	rs28783127	4_84421869_G_T	4_84370124_TAA_TA	4	new	4:84370124	1.02(0.94-1.11)	0.62	1.05(1.03-1.08)	1.5e-05	1.04(1.01-1.06)	0.00095	9.2e-08	7.36e-09	+++
chr4	84423038	84423038	rs28653564	4_84423038_C_T	4_84370124_TAA_TA	4	new	4:84370124	1.02(0.94-1.11)	0.62	1.05(1.03-1.08)	1.5e-05	1.04(1.01-1.06)	0.00095	9.2e-08	1.18e-08	+++
chr4	84423359	84423359	rs7671387	4_84423359_A_G	4_84370124_TAA_TA	4	new	4:84370124	1.02(0.94-1.11)	0.62	1.05(1.03-1.08)	1.5e-05	1.04(1.01-1.06)	0.00095	9.2e-08	6.35e-09	+++
chr4	84423655	84423655	rs7694435	4_84423655_C_A	4_84370124_TAA_TA	4	new	4:84370124	1.02(0.94-1.11)	0.62	1.05(1.03-1.08)	1.5e-05	1.04(1.01-1.06)	0.00095	9.2e-08	7.37e-09	+++
chr4	84425758	84425758	rs11947695	4_84425758_C_T	4_84370124_TAA_TA	4	new	4:84370124	1.02(0.94-1.11)	0.62	1.05(1.03-1.08)	1.5e-05	1.04(1.01-1.06)	0.00095	9.2e-08	6.42e-09	+++
chr4	84426107	84426107	rs34136446	4_84426107_C_CT	4_84370124_TAA_TA	4	new	4:84370124	1.02(0.94-1.11)	0.62	1.05(1.03-1.08)	1.5e-05	1.04(1.01-1.06)	0.00095	9.2e-08	2.26e-09	+++
chr4	84426584	84426584	rs11930653	4_84426584_C_T	4_84370124_TAA_TA	4	new	4:84370124	1.02(0.94-1.11)	0.62	1.05(1.03-1.08)	1.5e-05	1.04(1.01-1.06)	0.00095	9.2e-08	6.35e-09	+++
chr4	84426626	84426626	rs11935455	4_84426626_A_T	4_84370124_TAA_TA	4	new	4:84370124	1.02(0.94-1.11)	0.62	1.05(1.03-1.08)	1.5e-05	1.04(1.01-1.06)	0.00095	9.2e-08	6.57e-09	+++
chr4	84427476	84427476	rs13112255	4_84427476_G_A	4_84370124_TAA_TA	4	new	4:84370124	1.02(0.94-1.11)	0.62	1.05(1.03-1.08)	1.5e-05	1.04(1.01-1.06)	0.00095	9.2e-08	8.88e-09	+++
chr4	84428503	84428503	rs11728733	4_84428503_A_G	4_84370124_TAA_TA	4	new	4:84370124	1.02(0.94-1.11)	0.62	1.05(1.03-1.08)	1.5e-05	1.04(1.01-1.06)	0.00095	9.2e-08	7.52e-09	+++
chr4	84429213	84429213	rs13121249	4_84429213_G_A	4_84370124_TAA_TA	4	new	4:84370124	1.02(0.94-1.11)	0.62	1.05(1.03-1.08)	1.5e-05	1.04(1.01-1.06)	0.00095	9.2e-08	8.22e-09	+++
chr4	84429338	84429338	rs13128266	4_84429338_C_T	4_84370124_TAA_TA	4	new	4:84370124	1.02(0.94-1.11)	0.62	1.05(1.03-1.08)	1.5e-05	1.04(1.01-1.06)	0.00095	9.2e-08	8.32e-09	+++
chr4	84429879	84429879	rs11940256	4_84429879_T_C	4_84370124_TAA_TA	4	new	4:84370124	1.02(0.94-1.11)	0.62	1.05(1.03-1.08)	1.5e-05	1.04(1.01-1.06)	0.00095	9.2e-08	7.65e-09	+++
chr4	84430178	84430178	rs13128503	4_84430178_G_A	4_84370124_TAA_TA	4	new	4:84370124	1.02(0.94-1.11)	0.62	1.05(1.03-1.08)	1.5e-05	1.04(1.01-1.06)	0.00095	9.2e-08	8.1e-09	+++
chr4	84431644	84431644	rs10008742	4_84431644_C_A	4_84370124_TAA_TA	4	new	4:84370124	1.02(0.94-1.11)	0.62	1.05(1.03-1.08)	1.5e-05	1.04(1.01-1.06)	0.00095	9.2e-08	9e-09	+++
chr4	84432958	84432958	rs10012248	4_84432958_C_T	4_84370124_TAA_TA	4	new	4:84370124	1.02(0.94-1.11)	0.62	1.05(1.03-1.08)	1.5e-05	1.04(1.01-1.06)	0.00095	9.2e-08	1.31e-08	+++
chr4	84433804	84433804	rs971539	4_84433804_T_C	4_84370124_TAA_TA	4	new	4:84370124	1.02(0.94-1.11)	0.62	1.05(1.03-1.08)	1.5e-05	1.04(1.01-1.06)	0.00095	9.2e-08	9.88e-09	+++
chr4	84434587	84434587	rs9683689	4_84434587_G_A	4_84370124_TAA_TA	4	new	4:84370124	1.02(0.94-1.11)	0.62	1.05(1.03-1.08)	1.5e-05	1.04(1.01-1.06)	0.00095	9.2e-08	9.54e-09	+++
chr4	84435333	84435333	rs10015939	4_84435333_A_G	4_84370124_TAA_TA	4	new	4:84370124	1.02(0.94-1.11)	0.62	1.05(1.03-1.08)	1.5e-05	1.04(1.01-1.06)	0.00095	9.2e-08	1.5e-08	+++
chr4	84435654	84435654	rs10016216	4_84435654_A_G	4_84370124_TAA_TA	4	new	4:84370124	1.02(0.94-1.11)	0.62	1.05(1.03-1.08)	1.5e-05	1.04(1.01-1.06)	0.00095	9.2e-08	1.09e-08	+++
chr4	84436456	84436456	rs35452111	4_84436456_G_T	4_84370124_TAA_TA	4	new	4:84370124	1.02(0.94-1.11)	0.62	1.05(1.03-1.08)	1.5e-05	1.04(1.01-1.06)	0.00095	9.2e-08	1.88e-08	+++
chr4	84436461	84436461	rs7663427	4_84436461_C_A	4_84370124_TAA_TA	4	new	4:84370124	1.02(0.94-1.11)	0.62	1.05(1.03-1.08)	1.5e-05	1.04(1.01-1.06)	0.00095	9.2e-08	1.84e-08	+++
chr4	84437544	84437544	rs143767430	4_84437544_CTTGATTCA_C	4_84370124_TAA_TA	4	new	4:84370124	1.02(0.94-1.11)	0.62	1.05(1.03-1.08)	1.5e-05	1.04(1.01-1.06)	0.00095	9.2e-08	2e-08	+++
chr4	84437684	84437684	rs10032585	4_84437684_G_A	4_84370124_TAA_TA	4	new	4:84370124	1.02(0.94-1.11)	0.62	1.05(1.03-1.08)	1.5e-05	1.04(1.01-1.06)	0.00095	9.2e-08	1.44e-08	+++
chr4	84437790	84437790	rs10025004	4_84437790_T_G	4_84370124_TAA_TA	4	new	4:84370124	1.02(0.94-1.11)	0.62	1.05(1.03-1.08)	1.5e-05	1.04(1.01-1.06)	0.00095	9.2e-08	1.45e-08	+++
chr4	84438196	84438196	rs28869596	4_84438196_T_C	4_84370124_TAA_TA	4	new	4:84370124	1.02(0.94-1.11)	0.62	1.05(1.03-1.08)	1.5e-05	1.04(1.01-1.06)	0.00095	9.2e-08	3.61e-08	+++
chr4	84438275	84438275	rs2172809	4_84438275_A_G	4_84370124_TAA_TA	4	new	4:84370124	1.02(0.94-1.11)	0.62	1.05(1.03-1.08)	1.5e-05	1.04(1.01-1.06)	0.00095	9.2e-08	2.28e-08	+++
chr4	84438469	84438469	rs2132096	4_84438469_G_A	4_84370124_TAA_TA	4	new	4:84370124	1.02(0.94-1.11)	0.62	1.05(1.03-1.08)	1.5e-05	1.04(1.01-1.06)	0.00095	9.2e-08	2.44e-08	+++
chr4	84438484	84438484	rs2132097	4_84438484_G_A	4_84370124_TAA_TA	4	new	4:84370124	1.02(0.94-1.11)	0.62	1.05(1.03-1.08)	1.5e-05	1.04(1.01-1.06)	0.00095	9.2e-08	4.54e-08	+++
chr4	84439364	84439364	rs1964010	4_84439364_T_C	4_84370124_TAA_TA	4	new	4:84370124	1.02(0.94-1.11)	0.62	1.05(1.03-1.08)	1.5e-05	1.04(1.01-1.06)	0.00095	9.2e-08	2.75e-08	+++
chr4	84439820	84439820	rs1980271	4_84439820_G_A	4_84370124_TAA_TA	4	new	4:84370124	1.02(0.94-1.11)	0.62	1.05(1.03-1.08)	1.5e-05	1.04(1.01-1.06)	0.00095	9.2e-08	2.94e-08	+++
chr4	84440150	84440150	rs28603076	4_84440150_C_G	4_84370124_TAA_TA	4	new	4:84370124	1.02(0.94-1.11)	0.62	1.05(1.03-1.08)	1.5e-05	1.04(1.01-1.06)	0.00095	9.2e-08	3.34e-08	+++
chr4	84441716	84441716	rs10023702	4_84441716_C_T	4_84370124_TAA_TA	4	new	4:84370124	1.02(0.94-1.11)	0.62	1.05(1.03-1.08)	1.5e-05	1.04(1.01-1.06)	0.00095	9.2e-08	4.8e-08	+++
chr4	84442509	84442509	rs28875243	4_84442509_G_A	4_84370124_TAA_TA	4	new	4:84370124	1.02(0.94-1.11)	0.62	1.05(1.03-1.08)	1.5e-05	1.04(1.01-1.06)	0.00095	9.2e-08	5.86e-08	+++
chr4	84442663	84442663	rs28895925	4_84442663_G_A	4_84370124_TAA_TA	4	new	4:84370124	1.02(0.94-1.11)	0.62	1.05(1.03-1.08)	1.5e-05	1.04(1.01-1.06)	0.00095	9.2e-08	5.56e-08	+++
chr4	84446014	84446014	rs35589015	4_84446014_AT_A	4_84370124_TAA_TA	4	new	4:84370124	1.02(0.94-1.11)	0.62	1.05(1.03-1.08)	1.5e-05	1.04(1.01-1.06)	0.00095	9.2e-08	7.59e-08	+++
chr4	84448046	84448046	rs7684623	4_84448046_T_A	4_84370124_TAA_TA	4	new	4:84370124	1.02(0.94-1.11)	0.62	1.05(1.03-1.08)	1.5e-05	1.04(1.01-1.06)	0.00095	9.2e-08	4.38e-08	+++
chr4	84448176	84448176	rs7679811	4_84448176_A_T	4_84370124_TAA_TA	4	new	4:84370124	1.02(0.94-1.11)	0.62	1.05(1.03-1.08)	1.5e-05	1.04(1.01-1.06)	0.00095	9.2e-08	5.32e-08	+++
chr4	84448316	84448316	rs7684811	4_84448316_A_G	4_84370124_TAA_TA	4	new	4:84370124	1.02(0.94-1.11)	0.62	1.05(1.03-1.08)	1.5e-05	1.04(1.01-1.06)	0.00095	9.2e-08	3.96e-08	+++
chr4	84448900	84448900	rs2453429	4_84448900_T_C	4_84370124_TAA_TA	4	new	4:84370124	1.02(0.94-1.11)	0.62	1.05(1.03-1.08)	1.5e-05	1.04(1.01-1.06)	0.00095	9.2e-08	1.94e-08	+++
chr4	84449710	84449710	rs10009263	4_84449710_G_A	4_84370124_TAA_TA	4	new	4:84370124	1.02(0.94-1.11)	0.62	1.05(1.03-1.08)	1.5e-05	1.04(1.01-1.06)	0.00095	9.2e-08	5.6e-08	+++
chr4	84450412	84450412	rs10034960	4_84450412_C_T	4_84370124_TAA_TA	4	new	4:84370124	1.02(0.94-1.11)	0.62	1.05(1.03-1.08)	1.5e-05	1.04(1.01-1.06)	0.00095	9.2e-08	4.73e-08	+++
chr4	84452761	84452761	rs10010961	4_84452761_T_A	4_84370124_TAA_TA	4	new	4:84370124	1.02(0.94-1.11)	0.62	1.05(1.03-1.08)	1.5e-05	1.04(1.01-1.06)	0.00095	9.2e-08	6.07e-08	+++
chr4	84452950	84452950	rs10018970	4_84452950_G_A	4_84370124_TAA_TA	4	new	4:84370124	1.02(0.94-1.11)	0.62	1.05(1.03-1.08)	1.5e-05	1.04(1.01-1.06)	0.00095	9.2e-08	6.29e-08	+++
chr4	84453308	84453308	rs17355209	4_84453308_C_A	4_84370124_TAA_TA	4	new	4:84370124	1.02(0.94-1.11)	0.62	1.05(1.03-1.08)	1.5e-05	1.04(1.01-1.06)	0.00095	9.2e-08	3.78e-08	+++
chr4	84453788	84453788	rs11724892	4_84453788_C_T	4_84370124_TAA_TA	4	new	4:84370124	1.02(0.94-1.11)	0.62	1.05(1.03-1.08)	1.5e-05	1.04(1.01-1.06)	0.00095	9.2e-08	6.3e-08	+++
chr4	84454341	84454341	rs62305321	4_84454341_A_C	4_84370124_TAA_TA	4	new	4:84370124	1.02(0.94-1.11)	0.62	1.05(1.03-1.08)	1.5e-05	1.04(1.01-1.06)	0.00095	9.2e-08	6.75e-08	+++
chr4	84454344	84454344	rs150825078	4_84454344_GT_G	4_84370124_TAA_TA	4	new	4:84370124	1.02(0.94-1.11)	0.62	1.05(1.03-1.08)	1.5e-05	1.04(1.01-1.06)	0.00095	9.2e-08	5.52e-08	+++
chr4	84454356	84454356	rs10014570	4_84454356_A_G	4_84370124_TAA_TA	4	new	4:84370124	1.02(0.94-1.11)	0.62	1.05(1.03-1.08)	1.5e-05	1.04(1.01-1.06)	0.00095	9.2e-08	6.66e-08	+++
chr4	84454421	84454421	rs10014669	4_84454421_A_T	4_84370124_TAA_TA	4	new	4:84370124	1.02(0.94-1.11)	0.62	1.05(1.03-1.08)	1.5e-05	1.04(1.01-1.06)	0.00095	9.2e-08	5.87e-08	+++
chr4	84455601	84455601	rs6535481	4_84455601_G_A	4_84370124_TAA_TA	4	new	4:84370124	1.02(0.94-1.11)	0.62	1.05(1.03-1.08)	1.5e-05	1.04(1.01-1.06)	0.00095	9.2e-08	5.52e-08	+++
chr4	84456142	84456142	rs7672304	4_84456142_G_C	4_84370124_TAA_TA	4	new	4:84370124	1.02(0.94-1.11)	0.62	1.05(1.03-1.08)	1.5e-05	1.04(1.01-1.06)	0.00095	9.2e-08	4.41e-08	+++
chr4	84456409	84456409	rs9992543	4_84456409_C_T	4_84370124_TAA_TA	4	new	4:84370124	1.02(0.94-1.11)	0.62	1.05(1.03-1.08)	1.5e-05	1.04(1.01-1.06)	0.00095	9.2e-08	5.59e-08	+++
chr4	89240476	89240476	rs17014016	4_89240476_G_A	4_89243818_C_T	4	new	rs10022462	1.07(1.01-1.14)	0.022	1.03(1.01-1.06)	0.0064	1.04(1.02-1.06)	2.9e-05	9.1e-08	1.71e-09	+++
chr4	89242372	89242372	rs2869930	4_89242372_G_C	4_89243818_C_T	4	new	rs10022462	1.07(1.01-1.14)	0.022	1.03(1.01-1.06)	0.0064	1.04(1.02-1.06)	2.9e-05	9.1e-08	2.48e-09	+++
chr4	89242743	89242743	rs71594846	4_89242743_CCTGT_C	4_89243818_C_T	4	new	rs10022462	1.07(1.01-1.14)	0.022	1.03(1.01-1.06)	0.0064	1.04(1.02-1.06)	2.9e-05	9.1e-08	4.63e-09	+++
chr4	89243818	89243818	rs10022462	4_89243818_C_T	4_89243818_C_T	4	new	rs10022462	1.07(1.01-1.14)	0.022	1.03(1.01-1.06)	0.0064	1.04(1.02-1.06)	2.9e-05	9.1e-08	1.55e-09	+++
chr4	89246214	89246214	rs10516806	4_89246214_G_T	4_89243818_C_T	4	new	rs10022462	1.07(1.01-1.14)	0.022	1.03(1.01-1.06)	0.0064	1.04(1.02-1.06)	2.9e-05	9.1e-08	1.08e-08	---
chr4	106063987	106063987	rs12647922	4_106063987_C_T	4_106084778_C_T	4	old	rs9790517	1.07(1-1.15)	0.049	1.06(1.03-1.09)	1.5e-05	1.05(1.03-1.08)	1.5e-05	1.6e-10	5.26e-11	+++
chr4	106064683	106064683	rs17617028	4_106064683_G_A	4_106084778_C_T	4	old	rs9790517	1.07(1-1.15)	0.049	1.06(1.03-1.09)	1.5e-05	1.05(1.03-1.08)	1.5e-05	1.6e-10	2.47e-11	+++
chr4	106069013	106069013	rs62331150	4_106069013_G_T	4_106084778_C_T	4	old	rs9790517	1.07(1-1.15)	0.049	1.06(1.03-1.09)	1.5e-05	1.05(1.03-1.08)	1.5e-05	1.6e-10	1.85e-11	+++
chr4	106073509	106073509	rs62331151	4_106073509_A_G	4_106084778_C_T	4	old	rs9790517	1.07(1-1.15)	0.049	1.06(1.03-1.09)	1.5e-05	1.05(1.03-1.08)	1.5e-05	1.6e-10	3.19e-11	+++
chr4	106084778	106084778	rs9790517	4_106084778_C_T	4_106084778_C_T	4	old	rs9790517	1.07(1-1.15)	0.049	1.06(1.03-1.09)	1.5e-05	1.05(1.03-1.08)	1.5e-05	1.6e-10	5.03e-11	+++
chr4	106086302	106086302	rs12641113	4_106086302_C_T	4_106084778_C_T	4	old	rs9790517	1.07(1-1.15)	0.049	1.06(1.03-1.09)	1.5e-05	1.05(1.03-1.08)	1.5e-05	1.6e-10	5.31e-11	+++
chr4	106087822	106087822	rs10022109	4_106087822_A_G	4_106084778_C_T	4	old	rs9790517	1.07(1-1.15)	0.049	1.06(1.03-1.09)	1.5e-05	1.05(1.03-1.08)	1.5e-05	1.6e-10	5.26e-11	+++
chr4	106095243	106095243	rs35515350	4_106095243_C_T	4_106084778_C_T	4	old	rs9790517	1.07(1-1.15)	0.049	1.06(1.03-1.09)	1.5e-05	1.05(1.03-1.08)	1.5e-05	1.6e-10	7.56e-10	+++
chr4	106106131	106106131	rs10010281	4_106106131_G_C	4_106084778_C_T	4	old	rs9790517	1.07(1-1.15)	0.049	1.06(1.03-1.09)	1.5e-05	1.05(1.03-1.08)	1.5e-05	1.6e-10	4.71e-10	+++
chr4	106126413	106126413	rs988799	4_106126413_G_C	4_106084778_C_T	4	old	rs9790517	1.07(1-1.15)	0.049	1.06(1.03-1.09)	1.5e-05	1.05(1.03-1.08)	1.5e-05	1.6e-10	6.01e-10	---
chr4	106143968	106143968	rs9884985	4_106143968_G_A	4_106084778_C_T	4	old	rs9790517	1.07(1-1.15)	0.049	1.06(1.03-1.09)	1.5e-05	1.05(1.03-1.08)	1.5e-05	1.6e-10	1.27e-09	---
chr4	106180264	106180264	rs992493	4_106180264_T_C	4_106084778_C_T	4	old	rs9790517	1.07(1-1.15)	0.049	1.06(1.03-1.09)	1.5e-05	1.05(1.03-1.08)	1.5e-05	1.6e-10	1.71e-09	---
chr4	106185456	106185456	rs2726461	4_106185456_C_T	4_106084778_C_T	4	old	rs9790517	1.07(1-1.15)	0.049	1.06(1.03-1.09)	1.5e-05	1.05(1.03-1.08)	1.5e-05	1.6e-10	7.44e-10	---
chr4	106185663	106185663	rs2647249	4_106185663_C_T	4_106084778_C_T	4	old	rs9790517	1.07(1-1.15)	0.049	1.06(1.03-1.09)	1.5e-05	1.05(1.03-1.08)	1.5e-05	1.6e-10	9.74e-10	---
chr4	106195541	106195541	rs2726492	4_106195541_T_C	4_106084778_C_T	4	old	rs9790517	1.07(1-1.15)	0.049	1.06(1.03-1.09)	1.5e-05	1.05(1.03-1.08)	1.5e-05	1.6e-10	3.99e-10	---
chr4	106201556	106201556	rs2647256	4_106201556_T_C	4_106084778_C_T	4	old	rs9790517	1.07(1-1.15)	0.049	1.06(1.03-1.09)	1.5e-05	1.05(1.03-1.08)	1.5e-05	1.6e-10	4.75e-10	---
chr4	126843504	126843504	rs77528541	4_126843504_G_T	4_126843504_G_T	4	new	rs77528541	0.94(0.86-1.03)	0.17	0.95(0.92-0.99)	0.0061	0.94(0.92-0.97)	0.00027	2e-06	1.41e-09	---
chr4	175821735	175821735	rs1319629	4_175821735_C_T	4_175846426_C_A	4	old	rs6828523	0.89(0.81-0.98)	0.021	0.87(0.84-0.9)	1.6e-14	0.88(0.85-0.91)	5.7e-15	5.4e-29	1.57e-25	+++
chr4	175821923	175821923	rs985261	4_175821923_C_T	4_175846426_C_A	4	old	rs6828523	0.89(0.81-0.98)	0.021	0.87(0.84-0.9)	1.6e-14	0.88(0.85-0.91)	5.7e-15	5.4e-29	3.06e-26	+++
chr4	175822728	175822728	rs966765	4_175822728_G_A	4_175846426_C_A	4	old	rs6828523	0.89(0.81-0.98)	0.021	0.87(0.84-0.9)	1.6e-14	0.88(0.85-0.91)	5.7e-15	5.4e-29	1.12e-25	+++
chr4	175822759	175822759	rs6553846	4_175822759_T_C	4_175846426_C_A	4	old	rs6828523	0.89(0.81-0.98)	0.021	0.87(0.84-0.9)	1.6e-14	0.88(0.85-0.91)	5.7e-15	5.4e-29	1.49e-25	+++
chr4	175823392	175823392	rs12506943	4_175823392_G_A	4_175846426_C_A	4	old	rs6828523	0.89(0.81-0.98)	0.021	0.87(0.84-0.9)	1.6e-14	0.88(0.85-0.91)	5.7e-15	5.4e-29	1.02e-25	+++
chr4	175827456	175827456	rs13139984	4_175827456_C_T	4_175846426_C_A	4	old	rs6828523	0.89(0.81-0.98)	0.021	0.87(0.84-0.9)	1.6e-14	0.88(0.85-0.91)	5.7e-15	5.4e-29	3.37e-26	+++
chr4	175827730	175827730	rs13120671	4_175827730_A_T	4_175846426_C_A	4	old	rs6828523	0.89(0.81-0.98)	0.021	0.87(0.84-0.9)	1.6e-14	0.88(0.85-0.91)	5.7e-15	5.4e-29	6.72e-26	+++
chr4	175828036	175828036	rs7697216	4_175828036_T_C	4_175846426_C_A	4	old	rs6828523	0.89(0.81-0.98)	0.021	0.87(0.84-0.9)	1.6e-14	0.88(0.85-0.91)	5.7e-15	5.4e-29	1.61e-26	+++
chr4	175828082	175828082	rs7667257	4_175828082_G_A	4_175846426_C_A	4	old	rs6828523	0.89(0.81-0.98)	0.021	0.87(0.84-0.9)	1.6e-14	0.88(0.85-0.91)	5.7e-15	5.4e-29	3.38e-26	+++
chr4	175828287	175828287	rs7669051	4_175828287_C_T	4_175846426_C_A	4	old	rs6828523	0.89(0.81-0.98)	0.021	0.87(0.84-0.9)	1.6e-14	0.88(0.85-0.91)	5.7e-15	5.4e-29	3.38e-26	+++
chr4	175828408	175828408	rs7669284	4_175828408_C_T	4_175846426_C_A	4	old	rs6828523	0.89(0.81-0.98)	0.021	0.87(0.84-0.9)	1.6e-14	0.88(0.85-0.91)	5.7e-15	5.4e-29	3.35e-26	+++
chr4	175828505	175828505	rs7684319	4_175828505_G_A	4_175846426_C_A	4	old	rs6828523	0.89(0.81-0.98)	0.021	0.87(0.84-0.9)	1.6e-14	0.88(0.85-0.91)	5.7e-15	5.4e-29	3.84e-26	+++
chr4	175828665	175828665	rs7663354	4_175828665_A_G	4_175846426_C_A	4	old	rs6828523	0.89(0.81-0.98)	0.021	0.87(0.84-0.9)	1.6e-14	0.88(0.85-0.91)	5.7e-15	5.4e-29	2.74e-26	+++
chr4	175829485	175829485	rs10020805	4_175829485_G_A	4_175846426_C_A	4	old	rs6828523	0.89(0.81-0.98)	0.021	0.87(0.84-0.9)	1.6e-14	0.88(0.85-0.91)	5.7e-15	5.4e-29	3.21e-26	---
chr4	175829510	175829510	rs10010683	4_175829510_A_G	4_175846426_C_A	4	old	rs6828523	0.89(0.81-0.98)	0.021	0.87(0.84-0.9)	1.6e-14	0.88(0.85-0.91)	5.7e-15	5.4e-29	3.7e-26	---
chr4	175829561	175829561	rs10013130	4_175829561_T_C	4_175846426_C_A	4	old	rs6828523	0.89(0.81-0.98)	0.021	0.87(0.84-0.9)	1.6e-14	0.88(0.85-0.91)	5.7e-15	5.4e-29	3.43e-26	---
chr4	175829693	175829693	rs10020993	4_175829693_G_T	4_175846426_C_A	4	old	rs6828523	0.89(0.81-0.98)	0.021	0.87(0.84-0.9)	1.6e-14	0.88(0.85-0.91)	5.7e-15	5.4e-29	3.46e-26	---
chr4	175829805	175829805	rs9999409	4_175829805_C_T	4_175846426_C_A	4	old	rs6828523	0.89(0.81-0.98)	0.021	0.87(0.84-0.9)	1.6e-14	0.88(0.85-0.91)	5.7e-15	5.4e-29	3.6e-26	---
chr4	175830130	175830130	rs28647940	4_175830130_G_A	4_175846426_C_A	4	old	rs6828523	0.89(0.81-0.98)	0.021	0.87(0.84-0.9)	1.6e-14	0.88(0.85-0.91)	5.7e-15	5.4e-29	3.33e-26	---
chr4	175830257	175830257	rs10049880	4_175830257_A_G	4_175846426_C_A	4	old	rs6828523	0.89(0.81-0.98)	0.021	0.87(0.84-0.9)	1.6e-14	0.88(0.85-0.91)	5.7e-15	5.4e-29	4.09e-26	---
chr4	175830517	175830517	rs10049986	4_175830517_T_C	4_175846426_C_A	4	old	rs6828523	0.89(0.81-0.98)	0.021	0.87(0.84-0.9)	1.6e-14	0.88(0.85-0.91)	5.7e-15	5.4e-29	5.12e-25	---
chr4	175830862	175830862	rs28483302	4_175830862_G_A	4_175846426_C_A	4	old	rs6828523	0.89(0.81-0.98)	0.021	0.87(0.84-0.9)	1.6e-14	0.88(0.85-0.91)	5.7e-15	5.4e-29	3.53e-26	---
chr4	175831761	175831761	rs72999964	4_175831761_C_A	4_175846426_C_A	4	old	rs6828523	0.89(0.81-0.98)	0.021	0.87(0.84-0.9)	1.6e-14	0.88(0.85-0.91)	5.7e-15	5.4e-29	3.32e-26	---
chr4	175832937	175832937	rs7664956	4_175832937_G_T	4_175846426_C_A	4	old	rs6828523	0.89(0.81-0.98)	0.021	0.87(0.84-0.9)	1.6e-14	0.88(0.85-0.91)	5.7e-15	5.4e-29	3.02e-26	---
chr4	175833091	175833091	rs9884717	4_175833091_A_G	4_175846426_C_A	4	old	rs6828523	0.89(0.81-0.98)	0.021	0.87(0.84-0.9)	1.6e-14	0.88(0.85-0.91)	5.7e-15	5.4e-29	4.95e-26	---
chr4	175834588	175834588	rs72999969	4_175834588_G_A	4_175846426_C_A	4	old	rs6828523	0.89(0.81-0.98)	0.021	0.87(0.84-0.9)	1.6e-14	0.88(0.85-0.91)	5.7e-15	5.4e-29	5.6e-26	---
chr4	175835660	175835660	rs4695981	4_175835660_C_G	4_175846426_C_A	4	old	rs6828523	0.89(0.81-0.98)	0.021	0.87(0.84-0.9)	1.6e-14	0.88(0.85-0.91)	5.7e-15	5.4e-29	5.98e-26	---
chr4	175837416	175837416	rs28464422	4_175837416_A_G	4_175846426_C_A	4	old	rs6828523	0.89(0.81-0.98)	0.021	0.87(0.84-0.9)	1.6e-14	0.88(0.85-0.91)	5.7e-15	5.4e-29	2.9e-26	---
chr4	175837642	175837642	rs28439497	4_175837642_C_T	4_175846426_C_A	4	old	rs6828523	0.89(0.81-0.98)	0.021	0.87(0.84-0.9)	1.6e-14	0.88(0.85-0.91)	5.7e-15	5.4e-29	3.7e-26	---
chr4	175838941	175838941	rs10032806	4_175838941_G_A	4_175846426_C_A	4	old	rs6828523	0.89(0.81-0.98)	0.021	0.87(0.84-0.9)	1.6e-14	0.88(0.85-0.91)	5.7e-15	5.4e-29	4.21e-26	---
chr4	175839285	175839285	rs4072805	4_175839285_C_G	4_175846426_C_A	4	old	rs6828523	0.89(0.81-0.98)	0.021	0.87(0.84-0.9)	1.6e-14	0.88(0.85-0.91)	5.7e-15	5.4e-29	3.07e-25	---
chr4	175839432	175839432	rs1104945	4_175839432_A_C	4_175846426_C_A	4	old	rs6828523	0.89(0.81-0.98)	0.021	0.87(0.84-0.9)	1.6e-14	0.88(0.85-0.91)	5.7e-15	5.4e-29	5.25e-26	---
chr4	175839725	175839725	rs4330336	4_175839725_C_T	4_175846426_C_A	4	old	rs6828523	0.89(0.81-0.98)	0.021	0.87(0.84-0.9)	1.6e-14	0.88(0.85-0.91)	5.7e-15	5.4e-29	1.19e-25	---
chr4	175839727	175839727	rs9991047	4_175839727_G_A	4_175846426_C_A	4	old	rs6828523	0.89(0.81-0.98)	0.021	0.87(0.84-0.9)	1.6e-14	0.88(0.85-0.91)	5.7e-15	5.4e-29	4.87e-26	---
chr4	175840903	175840903	rs7666569	4_175840903_T_C	4_175846426_C_A	4	old	rs6828523	0.89(0.81-0.98)	0.021	0.87(0.84-0.9)	1.6e-14	0.88(0.85-0.91)	5.7e-15	5.4e-29	1.6e-25	---
chr4	175842495	175842495	rs28436676	4_175842495_G_A	4_175846426_C_A	4	old	rs6828523	0.89(0.81-0.98)	0.021	0.87(0.84-0.9)	1.6e-14	0.88(0.85-0.91)	5.7e-15	5.4e-29	4.63e-26	---
chr4	175842979	175842979	rs28475635	4_175842979_G_A	4_175846426_C_A	4	old	rs6828523	0.89(0.81-0.98)	0.021	0.87(0.84-0.9)	1.6e-14	0.88(0.85-0.91)	5.7e-15	5.4e-29	5.26e-26	---
chr4	175844216	175844216	rs33957113	4_175844216_TA_T	4_175846426_C_A	4	old	rs6828523	0.89(0.81-0.98)	0.021	0.87(0.84-0.9)	1.6e-14	0.88(0.85-0.91)	5.7e-15	5.4e-29	2.13e-25	---
chr4	175844270	175844270	rs28750347	4_175844270_G_A	4_175846426_C_A	4	old	rs6828523	0.89(0.81-0.98)	0.021	0.87(0.84-0.9)	1.6e-14	0.88(0.85-0.91)	5.7e-15	5.4e-29	5.62e-26	---
chr4	175844531	175844531	rs28713645	4_175844531_T_G	4_175846426_C_A	4	old	rs6828523	0.89(0.81-0.98)	0.021	0.87(0.84-0.9)	1.6e-14	0.88(0.85-0.91)	5.7e-15	5.4e-29	4.92e-26	---
chr4	175844585	175844585	rs28566513	4_175844585_G_C	4_175846426_C_A	4	old	rs6828523	0.89(0.81-0.98)	0.021	0.87(0.84-0.9)	1.6e-14	0.88(0.85-0.91)	5.7e-15	5.4e-29	5.64e-26	---
chr4	175845869	175845869	rs6827315	4_175845869_C_T	4_175846426_C_A	4	old	rs6828523	0.89(0.81-0.98)	0.021	0.87(0.84-0.9)	1.6e-14	0.88(0.85-0.91)	5.7e-15	5.4e-29	1.32e-25	---
chr4	175846110	175846110	rs6826366	4_175846110_G_A	4_175846426_C_A	4	old	rs6828523	0.89(0.81-0.98)	0.021	0.87(0.84-0.9)	1.6e-14	0.88(0.85-0.91)	5.7e-15	5.4e-29	5.2e-26	---
chr4	175846320	175846320	rs6853513	4_175846320_A_G	4_175846426_C_A	4	old	rs6828523	0.89(0.81-0.98)	0.021	0.87(0.84-0.9)	1.6e-14	0.88(0.85-0.91)	5.7e-15	5.4e-29	5.71e-26	---
chr4	175846426	175846426	rs6828523	4_175846426_C_A	4_175846426_C_A	4	old	rs6828523	0.89(0.81-0.98)	0.021	0.87(0.84-0.9)	1.6e-14	0.88(0.85-0.91)	5.7e-15	5.4e-29	1.79e-25	---
chr4	175847144	175847144	rs7654815	4_175847144_A_T	4_175846426_C_A	4	old	rs6828523	0.89(0.81-0.98)	0.021	0.87(0.84-0.9)	1.6e-14	0.88(0.85-0.91)	5.7e-15	5.4e-29	6.62e-25	---
chr4	175847527	175847527	rs9312575	4_175847527_T_C	4_175846426_C_A	4	old	rs6828523	0.89(0.81-0.98)	0.021	0.87(0.84-0.9)	1.6e-14	0.88(0.85-0.91)	5.7e-15	5.4e-29	1.49e-25	---
chr4	175849984	175849984	rs9998487	4_175849984_T_A	4_175846426_C_A	4	old	rs6828523	0.89(0.81-0.98)	0.021	0.87(0.84-0.9)	1.6e-14	0.88(0.85-0.91)	5.7e-15	5.4e-29	6.5e-26	---
chr4	175850605	175850605	rs28465148	4_175850605_T_G	4_175846426_C_A	4	old	rs6828523	0.89(0.81-0.98)	0.021	0.87(0.84-0.9)	1.6e-14	0.88(0.85-0.91)	5.7e-15	5.4e-29	2e-25	---
chr5	304039	304039	rs62329994	5_304039_G_A	5_345109_T_C	5	new	rs116095464	1.17(1.03-1.33)	0.016	1.08(1.03-1.14)	0.0019	1.07(1.02-1.12)	0.0023	1.7e-06	2.84e-07	+++
chr5	308352	308352	rs56075848	5_308352_T_C	5_345109_T_C	5	new	rs116095464	1.17(1.03-1.33)	0.016	1.08(1.03-1.14)	0.0019	1.07(1.02-1.12)	0.0023	1.7e-06	2.17e-07	+++
chr5	310530	310530	rs7721278	5_310530_G_A	5_345109_T_C	5	new	rs116095464	1.17(1.03-1.33)	0.016	1.08(1.03-1.14)	0.0019	1.07(1.02-1.12)	0.0023	1.7e-06	1.98e-07	+++
chr5	314935	314935	rs7736	5_314935_T_C	5_345109_T_C	5	new	rs116095464	1.17(1.03-1.33)	0.016	1.08(1.03-1.14)	0.0019	1.07(1.02-1.12)	0.0023	1.7e-06	7.74e-08	+++
chr5	315616	315616	rs1567956	5_315616_C_A	5_345109_T_C	5	new	rs116095464	1.17(1.03-1.33)	0.016	1.08(1.03-1.14)	0.0019	1.07(1.02-1.12)	0.0023	1.7e-06	9.57e-08	+++
chr5	315660	315660	rs11133969	5_315660_T_TCTTCTAC	5_345109_T_C	5	new	rs116095464	1.17(1.03-1.33)	0.016	1.08(1.03-1.14)	0.0019	1.07(1.02-1.12)	0.0023	1.7e-06	1.57e-07	+++
chr5	317119	317119	rs908116	5_317119_A_T	5_345109_T_C	5	new	rs116095464	1.17(1.03-1.33)	0.016	1.08(1.03-1.14)	0.0019	1.07(1.02-1.12)	0.0023	1.7e-06	9.31e-08	+++
chr5	317670	317670	rs73023433	5_317670_G_A	5_345109_T_C	5	new	rs116095464	1.17(1.03-1.33)	0.016	1.08(1.03-1.14)	0.0019	1.07(1.02-1.12)	0.0023	1.7e-06	9.76e-08	+++
chr5	317926	317926	5:317926	5_317926_G_C	5_345109_T_C	5	new	rs116095464	1.17(1.03-1.33)	0.016	1.08(1.03-1.14)	0.0019	1.07(1.02-1.12)	0.0023	1.7e-06	2.54e-07	+++
chr5	317929	317929	5:317929	5_317929_A_AGCC	5_345109_T_C	5	new	rs116095464	1.17(1.03-1.33)	0.016	1.08(1.03-1.14)	0.0019	1.07(1.02-1.12)	0.0023	1.7e-06	2.65e-07	+++
chr5	325003	325003	rs6863730	5_325003_G_T	5_345109_T_C	5	new	rs116095464	1.17(1.03-1.33)	0.016	1.08(1.03-1.14)	0.0019	1.07(1.02-1.12)	0.0023	1.7e-06	1.24e-07	+++
chr5	345109	345109	rs116095464	5_345109_T_C	5_345109_T_C	5	new	rs116095464	1.17(1.03-1.33)	0.016	1.08(1.03-1.14)	0.0019	1.07(1.02-1.12)	0.0023	1.7e-06	3.8e-09	+++
chr5	346785	346785	rs62331560	5_346785_G_C	5_345109_T_C	5	new	rs116095464	1.17(1.03-1.33)	0.016	1.08(1.03-1.14)	0.0019	1.07(1.02-1.12)	0.0023	1.7e-06	1.24e-07	+++
chr5	355286	355286	rs62331563	5_355286_T_C	5_345109_T_C	5	new	rs116095464	1.17(1.03-1.33)	0.016	1.08(1.03-1.14)	0.0019	1.07(1.02-1.12)	0.0023	1.7e-06	3.44e-07	+++
chr5	431196	431196	rs768479	5_431196_C_T	5_345109_T_C	5	new	rs116095464	1.17(1.03-1.33)	0.016	1.08(1.03-1.14)	0.0019	1.07(1.02-1.12)	0.0023	1.7e-06	2.36e-07	---
chr5	1294086	1294086	rs2736098	5_1294086_C_T	5_1296255_A_AG	5	old	rs3215401	1.01(0.92-1.11)	0.76	0.96(0.94-0.99)	0.0017	0.95(0.93-0.97)	7.8e-06	1.1e-07	3.28e-20	---
chr5	1295349	1295349	rs2853669	5_1295349_A_G	5_1296255_A_AG	5	old	rs3215401	1.01(0.92-1.11)	0.76	0.96(0.94-0.99)	0.0017	0.95(0.93-0.97)	7.8e-06	1.1e-07	4.05e-21	---
chr5	1296255	1296255	rs3215401	5_1296255_A_AG	5_1296255_A_AG	5	old	rs3215401	1.01(0.92-1.11)	0.76	0.96(0.94-0.99)	0.0017	0.95(0.93-0.97)	7.8e-06	1.1e-07	1.07e-20	---
chr5	1297077	1297077	rs10548207	5_1297077_ACC_A	5_1296255_A_AG	5	old	rs3215401	1.01(0.92-1.11)	0.76	0.96(0.94-0.99)	0.0017	0.95(0.93-0.97)	7.8e-06	1.1e-07	2.91e-19	---
chr5	1297488	1297488	rs2736108	5_1297488_C_T	5_1296255_A_AG	5	old	rs3215401	1.01(0.92-1.11)	0.76	0.96(0.94-0.99)	0.0017	0.95(0.93-0.97)	7.8e-06	1.1e-07	3.88e-19	---
chr5	1297854	1297854	rs2736107	5_1297854_C_T	5_1296255_A_AG	5	old	rs3215401	1.01(0.92-1.11)	0.76	0.96(0.94-0.99)	0.0017	0.95(0.93-0.97)	7.8e-06	1.1e-07	1.4e-19	---
chr5	32550128	32550128	rs4867114	5_32550128_A_G	5_32567732_C_T	5	old	rs2012709	1.07(1.01-1.14)	0.021	1.05(1.02-1.07)	0.00012	1.03(1.01-1.05)	0.0024	1.8e-07	1.3e-07	+++
chr5	32552432	32552432	rs34666745	5_32552432_G_A	5_32567732_C_T	5	old	rs2012709	1.07(1.01-1.14)	0.021	1.05(1.02-1.07)	0.00012	1.03(1.01-1.05)	0.0024	1.8e-07	1.38e-07	+++
chr5	32552923	32552923	rs12513664	5_32552923_T_C	5_32567732_C_T	5	old	rs2012709	1.07(1.01-1.14)	0.021	1.05(1.02-1.07)	0.00012	1.03(1.01-1.05)	0.0024	1.8e-07	1.12e-07	+++
chr5	32552954	32552954	rs12516077	5_32552954_A_G	5_32567732_C_T	5	old	rs2012709	1.07(1.01-1.14)	0.021	1.05(1.02-1.07)	0.00012	1.03(1.01-1.05)	0.0024	1.8e-07	6.51e-08	+++
chr5	32553266	32553266	rs12521288	5_32553266_C_G	5_32567732_C_T	5	old	rs2012709	1.07(1.01-1.14)	0.021	1.05(1.02-1.07)	0.00012	1.03(1.01-1.05)	0.0024	1.8e-07	1.21e-07	+++
chr5	32553449	32553449	rs4259178	5_32553449_C_G	5_32567732_C_T	5	old	rs2012709	1.07(1.01-1.14)	0.021	1.05(1.02-1.07)	0.00012	1.03(1.01-1.05)	0.0024	1.8e-07	1.2e-07	+++
chr5	32553710	32553710	rs4629615	5_32553710_A_G	5_32567732_C_T	5	old	rs2012709	1.07(1.01-1.14)	0.021	1.05(1.02-1.07)	0.00012	1.03(1.01-1.05)	0.0024	1.8e-07	1.2e-07	+++
chr5	32554712	32554712	rs56121682	5_32554712_T_G	5_32567732_C_T	5	old	rs2012709	1.07(1.01-1.14)	0.021	1.05(1.02-1.07)	0.00012	1.03(1.01-1.05)	0.0024	1.8e-07	1.21e-07	+++
chr5	32557008	32557008	rs12516627	5_32557008_T_G	5_32567732_C_T	5	old	rs2012709	1.07(1.01-1.14)	0.021	1.05(1.02-1.07)	0.00012	1.03(1.01-1.05)	0.0024	1.8e-07	1.35e-07	+++
chr5	32557816	32557816	rs13177684	5_32557816_T_C	5_32567732_C_T	5	old	rs2012709	1.07(1.01-1.14)	0.021	1.05(1.02-1.07)	0.00012	1.03(1.01-1.05)	0.0024	1.8e-07	1.37e-07	+++
chr5	32558169	32558169	rs34352530	5_32558169_G_C	5_32567732_C_T	5	old	rs2012709	1.07(1.01-1.14)	0.021	1.05(1.02-1.07)	0.00012	1.03(1.01-1.05)	0.0024	1.8e-07	8.75e-08	+++
chr5	32558888	32558888	rs67959447	5_32558888_G_C	5_32567732_C_T	5	old	rs2012709	1.07(1.01-1.14)	0.021	1.05(1.02-1.07)	0.00012	1.03(1.01-1.05)	0.0024	1.8e-07	1.16e-07	+++
chr5	32559017	32559017	rs4867454	5_32559017_C_T	5_32567732_C_T	5	old	rs2012709	1.07(1.01-1.14)	0.021	1.05(1.02-1.07)	0.00012	1.03(1.01-1.05)	0.0024	1.8e-07	1.06e-07	+++
chr5	32561574	32561574	rs4867456	5_32561574_G_A	5_32567732_C_T	5	old	rs2012709	1.07(1.01-1.14)	0.021	1.05(1.02-1.07)	0.00012	1.03(1.01-1.05)	0.0024	1.8e-07	1.28e-07	+++
chr5	32563122	32563122	rs11742628	5_32563122_T_G	5_32567732_C_T	5	old	rs2012709	1.07(1.01-1.14)	0.021	1.05(1.02-1.07)	0.00012	1.03(1.01-1.05)	0.0024	1.8e-07	1.2e-07	+++
chr5	32564547	32564547	rs6879109	5_32564547_A_C	5_32567732_C_T	5	old	rs2012709	1.07(1.01-1.14)	0.021	1.05(1.02-1.07)	0.00012	1.03(1.01-1.05)	0.0024	1.8e-07	1.19e-07	+++
chr5	32567732	32567732	rs2012709	5_32567732_C_T	5_32567732_C_T	5	old	rs2012709	1.07(1.01-1.14)	0.021	1.05(1.02-1.07)	0.00012	1.03(1.01-1.05)	0.0024	1.8e-07	1.15e-08	+++
chr5	32568424	32568424	rs11739056	5_32568424_C_T	5_32567732_C_T	5	old	rs2012709	1.07(1.01-1.14)	0.021	1.05(1.02-1.07)	0.00012	1.03(1.01-1.05)	0.0024	1.8e-07	6.56e-09	+++
chr5	32575171	32575171	rs34850502	5_32575171_T_C	5_32567732_C_T	5	old	rs2012709	1.07(1.01-1.14)	0.021	1.05(1.02-1.07)	0.00012	1.03(1.01-1.05)	0.0024	1.8e-07	1.11e-07	+++
chr5	32575881	32575881	rs58390450	5_32575881_A_G	5_32567732_C_T	5	old	rs2012709	1.07(1.01-1.14)	0.021	1.05(1.02-1.07)	0.00012	1.03(1.01-1.05)	0.0024	1.8e-07	1.09e-07	+++
chr5	32576561	32576561	rs34818322	5_32576561_CA_C	5_32567732_C_T	5	old	rs2012709	1.07(1.01-1.14)	0.021	1.05(1.02-1.07)	0.00012	1.03(1.01-1.05)	0.0024	1.8e-07	5.36e-07	---
chr5	32577772	32577772	rs35508346	5_32577772_C_T	5_32567732_C_T	5	old	rs2012709	1.07(1.01-1.14)	0.021	1.05(1.02-1.07)	0.00012	1.03(1.01-1.05)	0.0024	1.8e-07	6.54e-09	+++
chr5	32579616	32579616	rs35130031	5_32579616_TCA_T	5_32567732_C_T	5	old	rs2012709	1.07(1.01-1.14)	0.021	1.05(1.02-1.07)	0.00012	1.03(1.01-1.05)	0.0024	1.8e-07	1.25e-08	+++
chr5	32581186	32581186	rs12519859	5_32581186_G_A	5_32567732_C_T	5	old	rs2012709	1.07(1.01-1.14)	0.021	1.05(1.02-1.07)	0.00012	1.03(1.01-1.05)	0.0024	1.8e-07	5.77e-09	+++
chr5	32586387	32586387	rs72739259	5_32586387_T_C	5_32567732_C_T	5	old	rs2012709	1.07(1.01-1.14)	0.021	1.05(1.02-1.07)	0.00012	1.03(1.01-1.05)	0.0024	1.8e-07	1.31e-07	+++
chr5	44706498	44706498	rs10941679	5_44706498_A_G	5_44706498_A_G	5	old	rs10941679	1.16(1.08-1.24)	2.4e-05	1.15(1.12-1.18)	2.8e-28	1.18(1.16-1.21)	6.5e-48	8.3e-78	5.61e-73	+++
chr5	49484480	49484480	5:49484480	5_49484480_A_G	5_49641645_T_C	5	new	rs72749841	0.86(0.75-0.99)	0.038	0.91(0.87-0.95)	6.2e-05	0.94(0.9-0.97)	0.00011	8e-09	4.2e-09	---
chr5	49641645	49641645	rs72749841	5_49641645_T_C	5_49641645_T_C	5	new	rs72749841	0.86(0.75-0.99)	0.038	0.91(0.87-0.95)	6.2e-05	0.94(0.9-0.97)	0.00011	8e-09	7.21e-10	---
chr5	50089651	50089651	rs26067	5_50089651_G_A	5_49641645_T_C	5	new	rs72749841	0.86(0.75-0.99)	0.038	0.91(0.87-0.95)	6.2e-05	0.94(0.9-0.97)	0.00011	8e-09	1.91e-08	+++
chr5	50195093	50195093	rs35951924	5_50195093_A_AT	5_50195093_A_AT	5	new	rs35951924	0.95(0.89-1.01)	0.12	0.93(0.91-0.96)	1.9e-06	0.95(0.93-0.97)	3.4e-06	1.2e-11	1.31e-11	---
chr5	50237548	50237548	rs27280	5_50237548_A_G	5_50195093_A_AT	5	new	rs35951924	0.95(0.89-1.01)	0.12	0.93(0.91-0.96)	1.9e-06	0.95(0.93-0.97)	3.4e-06	1.2e-11	8.21e-11	---
chr5	50238519	50238519	rs27279	5_50238519_C_T	5_50195093_A_AT	5	new	rs35951924	0.95(0.89-1.01)	0.12	0.93(0.91-0.96)	1.9e-06	0.95(0.93-0.97)	3.4e-06	1.2e-11	6.62e-11	---
chr5	56003831	56003831	rs10461612	5_56003831_G_C	5_56053723_A_T	5	old	rs62355902	1.24(1.14-1.34)	2.1e-07	1.23(1.2-1.27)	5.7e-43	1.22(1.19-1.25)	2.7e-49	2.9e-96	2.68e-96	+++
chr5	56007339	56007339	rs7709971	5_56007339_G_A	5_56053723_A_T	5	old	rs62355902	1.24(1.14-1.34)	2.1e-07	1.23(1.2-1.27)	5.7e-43	1.22(1.19-1.25)	2.7e-49	2.9e-96	2.95e-96	+++
chr5	56011357	56011357	rs7714232	5_56011357_A_T	5_56053723_A_T	5	old	rs62355902	1.24(1.14-1.34)	2.1e-07	1.23(1.2-1.27)	5.7e-43	1.22(1.19-1.25)	2.7e-49	2.9e-96	3.35e-96	+++
chr5	56016918	56016918	rs12653202	5_56016918_A_C	5_56053723_A_T	5	old	rs62355902	1.24(1.14-1.34)	2.1e-07	1.23(1.2-1.27)	5.7e-43	1.22(1.19-1.25)	2.7e-49	2.9e-96	2.37e-97	+++
chr5	56019064	56019064	rs61055995	5_56019064_A_T	5_56053723_A_T	5	old	rs62355902	1.24(1.14-1.34)	2.1e-07	1.23(1.2-1.27)	5.7e-43	1.22(1.19-1.25)	2.7e-49	2.9e-96	9.05e-97	+++
chr5	56023083	56023083	rs16886165	5_56023083_T_G	5_56053723_A_T	5	old	rs62355902	1.24(1.14-1.34)	2.1e-07	1.23(1.2-1.27)	5.7e-43	1.22(1.19-1.25)	2.7e-49	2.9e-96	4.39e-97	+++
chr5	56027240	56027240	rs59957907	5_56027240_A_G	5_56053723_A_T	5	old	rs62355902	1.24(1.14-1.34)	2.1e-07	1.23(1.2-1.27)	5.7e-43	1.22(1.19-1.25)	2.7e-49	2.9e-96	3.87e-98	+++
chr5	56029243	56029243	rs16886181	5_56029243_T_C	5_56053723_A_T	5	old	rs62355902	1.24(1.14-1.34)	2.1e-07	1.23(1.2-1.27)	5.7e-43	1.22(1.19-1.25)	2.7e-49	2.9e-96	8.89e-98	+++
chr5	56029500	56029500	rs111993757	5_56029500_AGTCT_A	5_56053723_A_T	5	old	rs62355902	1.24(1.14-1.34)	2.1e-07	1.23(1.2-1.27)	5.7e-43	1.22(1.19-1.25)	2.7e-49	2.9e-96	4.27e-97	+++
chr5	56030827	56030827	rs61008914	5_56030827_T_TA	5_56053723_A_T	5	old	rs62355902	1.24(1.14-1.34)	2.1e-07	1.23(1.2-1.27)	5.7e-43	1.22(1.19-1.25)	2.7e-49	2.9e-96	7.86e-97	+++
chr5	56051596	56051596	rs66893416	5_56051596_G_A	5_56053723_A_T	5	old	rs62355902	1.24(1.14-1.34)	2.1e-07	1.23(1.2-1.27)	5.7e-43	1.22(1.19-1.25)	2.7e-49	2.9e-96	4.13e-97	+++
chr5	56052695	56052695	rs62355900	5_56052695_T_C	5_56053723_A_T	5	old	rs62355902	1.24(1.14-1.34)	2.1e-07	1.23(1.2-1.27)	5.7e-43	1.22(1.19-1.25)	2.7e-49	2.9e-96	1.27e-96	+++
chr5	56053479	56053479	rs74345699	5_56053479_C_T	5_56053723_A_T	5	old	rs62355902	1.24(1.14-1.34)	2.1e-07	1.23(1.2-1.27)	5.7e-43	1.22(1.19-1.25)	2.7e-49	2.9e-96	4.01e-97	+++
chr5	56053535	56053535	rs62355901	5_56053535_T_C	5_56053723_A_T	5	old	rs62355902	1.24(1.14-1.34)	2.1e-07	1.23(1.2-1.27)	5.7e-43	1.22(1.19-1.25)	2.7e-49	2.9e-96	3.42e-98	+++
chr5	56053723	56053723	rs62355902	5_56053723_A_T	5_56053723_A_T	5	old	rs62355902	1.24(1.14-1.34)	2.1e-07	1.23(1.2-1.27)	5.7e-43	1.22(1.19-1.25)	2.7e-49	2.9e-96	6.78e-98	+++
chr5	56053745	56053745	5:56053745	5_56053745_AAAAC_AAAACAAAC	5_56053723_A_T	5	old	rs62355902	1.24(1.14-1.34)	2.1e-07	1.23(1.2-1.27)	5.7e-43	1.22(1.19-1.25)	2.7e-49	2.9e-96	3.57e-98	+++
chr5	58184061	58184061	rs10472076	5_58184061_T_C	5_58337481_T_G	5	old	rs1353747	0.93(0.84-1.04)	0.2	0.93(0.89-0.97)	0.00025	0.95(0.92-0.98)	0.0018	8.2e-07	9.64e-09	+++
chr5	58241712	58241712	rs113778879	5_58241712_C_T	5_58337481_T_G	5	old	rs1353747	0.93(0.84-1.04)	0.2	0.93(0.89-0.97)	0.00025	0.95(0.92-0.98)	0.0018	8.2e-07	9.68e-09	---
chr5	58294084	58294084	rs76110088	5_58294084_T_C	5_58337481_T_G	5	old	rs1353747	0.93(0.84-1.04)	0.2	0.93(0.89-0.97)	0.00025	0.95(0.92-0.98)	0.0018	8.2e-07	2.2e-09	---
chr5	58301092	58301092	rs79927844	5_58301092_T_A	5_58337481_T_G	5	old	rs1353747	0.93(0.84-1.04)	0.2	0.93(0.89-0.97)	0.00025	0.95(0.92-0.98)	0.0018	8.2e-07	2.12e-09	---
chr5	58301347	58301347	rs75932991	5_58301347_C_T	5_58337481_T_G	5	old	rs1353747	0.93(0.84-1.04)	0.2	0.93(0.89-0.97)	0.00025	0.95(0.92-0.98)	0.0018	8.2e-07	1.68e-09	---
chr5	58306572	58306572	rs111567606	5_58306572_A_C	5_58337481_T_G	5	old	rs1353747	0.93(0.84-1.04)	0.2	0.93(0.89-0.97)	0.00025	0.95(0.92-0.98)	0.0018	8.2e-07	1.21e-09	---
chr5	58309319	58309319	rs116095611	5_58309319_A_G	5_58337481_T_G	5	old	rs1353747	0.93(0.84-1.04)	0.2	0.93(0.89-0.97)	0.00025	0.95(0.92-0.98)	0.0018	8.2e-07	1.7e-09	---
chr5	58310728	58310728	rs146209337	5_58310728_C_T	5_58337481_T_G	5	old	rs1353747	0.93(0.84-1.04)	0.2	0.93(0.89-0.97)	0.00025	0.95(0.92-0.98)	0.0018	8.2e-07	1.78e-09	---
chr5	58312269	58312269	rs3087748	5_58312269_G_A	5_58337481_T_G	5	old	rs1353747	0.93(0.84-1.04)	0.2	0.93(0.89-0.97)	0.00025	0.95(0.92-0.98)	0.0018	8.2e-07	1.32e-09	---
chr5	58313370	58313370	rs78165411	5_58313370_C_T	5_58337481_T_G	5	old	rs1353747	0.93(0.84-1.04)	0.2	0.93(0.89-0.97)	0.00025	0.95(0.92-0.98)	0.0018	8.2e-07	1.41e-09	---
chr5	58315110	58315110	rs78778448	5_58315110_C_T	5_58337481_T_G	5	old	rs1353747	0.93(0.84-1.04)	0.2	0.93(0.89-0.97)	0.00025	0.95(0.92-0.98)	0.0018	8.2e-07	1.06e-09	---
chr5	58315791	58315791	rs75971028	5_58315791_T_C	5_58337481_T_G	5	old	rs1353747	0.93(0.84-1.04)	0.2	0.93(0.89-0.97)	0.00025	0.95(0.92-0.98)	0.0018	8.2e-07	1.68e-09	---
chr5	58316147	58316147	rs113750057	5_58316147_C_CA	5_58337481_T_G	5	old	rs1353747	0.93(0.84-1.04)	0.2	0.93(0.89-0.97)	0.00025	0.95(0.92-0.98)	0.0018	8.2e-07	9.93e-10	---
chr5	58318934	58318934	rs1075641	5_58318934_G_A	5_58337481_T_G	5	old	rs1353747	0.93(0.84-1.04)	0.2	0.93(0.89-0.97)	0.00025	0.95(0.92-0.98)	0.0018	8.2e-07	1.48e-09	---
chr5	58318971	58318971	rs1075640	5_58318971_C_T	5_58337481_T_G	5	old	rs1353747	0.93(0.84-1.04)	0.2	0.93(0.89-0.97)	0.00025	0.95(0.92-0.98)	0.0018	8.2e-07	1.58e-09	---
chr5	58323837	58323837	rs10940639	5_58323837_A_G	5_58337481_T_G	5	old	rs1353747	0.93(0.84-1.04)	0.2	0.93(0.89-0.97)	0.00025	0.95(0.92-0.98)	0.0018	8.2e-07	1.43e-09	---
chr5	58325230	58325230	rs141986779	5_58325230_C_T	5_58337481_T_G	5	old	rs1353747	0.93(0.84-1.04)	0.2	0.93(0.89-0.97)	0.00025	0.95(0.92-0.98)	0.0018	8.2e-07	1.7e-09	---
chr5	58337481	58337481	rs1353747	5_58337481_T_G	5_58337481_T_G	5	old	rs1353747	0.93(0.84-1.04)	0.2	0.93(0.89-0.97)	0.00025	0.95(0.92-0.98)	0.0018	8.2e-07	4.08e-09	---
chr5	58338437	58338437	rs1553113	5_58338437_A_C	5_58337481_T_G	5	old	rs1353747	0.93(0.84-1.04)	0.2	0.93(0.89-0.97)	0.00025	0.95(0.92-0.98)	0.0018	8.2e-07	2.33e-09	---
chr5	58343067	58343067	rs1498608	5_58343067_T_A	5_58337481_T_G	5	old	rs1353747	0.93(0.84-1.04)	0.2	0.93(0.89-0.97)	0.00025	0.95(0.92-0.98)	0.0018	8.2e-07	3.48e-10	---
chr5	58346138	58346138	rs16889126	5_58346138_C_T	5_58337481_T_G	5	old	rs1353747	0.93(0.84-1.04)	0.2	0.93(0.89-0.97)	0.00025	0.95(0.92-0.98)	0.0018	8.2e-07	8.58e-10	---
chr5	58349478	58349478	5:58349478	5_58349478_T_G	5_58337481_T_G	5	old	rs1353747	0.93(0.84-1.04)	0.2	0.93(0.89-0.97)	0.00025	0.95(0.92-0.98)	0.0018	8.2e-07	3.3e-10	---
chr5	58350588	58350588	rs2968010	5_58350588_T_A	5_58337481_T_G	5	old	rs1353747	0.93(0.84-1.04)	0.2	0.93(0.89-0.97)	0.00025	0.95(0.92-0.98)	0.0018	8.2e-07	4.21e-10	---
chr5	58364206	58364206	rs17777413	5_58364206_C_A	5_58337481_T_G	5	old	rs1353747	0.93(0.84-1.04)	0.2	0.93(0.89-0.97)	0.00025	0.95(0.92-0.98)	0.0018	8.2e-07	4.99e-10	---
chr5	58365353	58365353	5:58365353	5_58365353_T_C	5_58337481_T_G	5	old	rs1353747	0.93(0.84-1.04)	0.2	0.93(0.89-0.97)	0.00025	0.95(0.92-0.98)	0.0018	8.2e-07	1.94e-10	---
chr5	58365569	58365569	rs144799080	5_58365569_C_CT	5_58337481_T_G	5	old	rs1353747	0.93(0.84-1.04)	0.2	0.93(0.89-0.97)	0.00025	0.95(0.92-0.98)	0.0018	8.2e-07	5.81e-10	---
chr5	58374223	58374223	rs78712445	5_58374223_T_C	5_58337481_T_G	5	old	rs1353747	0.93(0.84-1.04)	0.2	0.93(0.89-0.97)	0.00025	0.95(0.92-0.98)	0.0018	8.2e-07	8.9e-10	---
chr5	58378568	58378568	rs139435579	5_58378568_CTTAGA_C	5_58337481_T_G	5	old	rs1353747	0.93(0.84-1.04)	0.2	0.93(0.89-0.97)	0.00025	0.95(0.92-0.98)	0.0018	8.2e-07	6.8e-10	---
chr5	58387799	58387799	rs10940640	5_58387799_T_C	5_58337481_T_G	5	old	rs1353747	0.93(0.84-1.04)	0.2	0.93(0.89-0.97)	0.00025	0.95(0.92-0.98)	0.0018	8.2e-07	6.62e-10	---
chr5	58395679	58395679	rs76969790	5_58395679_T_G	5_58337481_T_G	5	old	rs1353747	0.93(0.84-1.04)	0.2	0.93(0.89-0.97)	0.00025	0.95(0.92-0.98)	0.0018	8.2e-07	6.56e-10	---
chr5	81261923	81261923	rs74906189	5_81261923_A_G	5_81538046_T_A	5	old	rs7707921	0.99(0.92-1.06)	0.78	0.92(0.9-0.95)	6.4e-09	0.95(0.93-0.97)	2.5e-05	8.1e-12	6.51e-12	---
chr5	81263522	81263522	rs4391141	5_81263522_T_A	5_81538046_T_A	5	old	rs7707921	0.99(0.92-1.06)	0.78	0.92(0.9-0.95)	6.4e-09	0.95(0.93-0.97)	2.5e-05	8.1e-12	1.14e-11	---
chr5	81268070	81268070	rs111549985	5_81268070_C_G	5_81538046_T_A	5	old	rs7707921	0.99(0.92-1.06)	0.78	0.92(0.9-0.95)	6.4e-09	0.95(0.93-0.97)	2.5e-05	8.1e-12	6.26e-12	---
chr5	81268499	81268499	rs73134709	5_81268499_G_A	5_81538046_T_A	5	old	rs7707921	0.99(0.92-1.06)	0.78	0.92(0.9-0.95)	6.4e-09	0.95(0.93-0.97)	2.5e-05	8.1e-12	7.84e-12	---
chr5	81272732	81272732	rs34981833	5_81272732_T_C	5_81538046_T_A	5	old	rs7707921	0.99(0.92-1.06)	0.78	0.92(0.9-0.95)	6.4e-09	0.95(0.93-0.97)	2.5e-05	8.1e-12	6.55e-12	---
chr5	81279021	81279021	rs113144863	5_81279021_C_G	5_81538046_T_A	5	old	rs7707921	0.99(0.92-1.06)	0.78	0.92(0.9-0.95)	6.4e-09	0.95(0.93-0.97)	2.5e-05	8.1e-12	8.17e-12	---
chr5	81281364	81281364	rs145230108	5_81281364_ACT_A	5_81538046_T_A	5	old	rs7707921	0.99(0.92-1.06)	0.78	0.92(0.9-0.95)	6.4e-09	0.95(0.93-0.97)	2.5e-05	8.1e-12	9.24e-12	---
chr5	81296479	81296479	rs113046446	5_81296479_C_CT	5_81538046_T_A	5	old	rs7707921	0.99(0.92-1.06)	0.78	0.92(0.9-0.95)	6.4e-09	0.95(0.93-0.97)	2.5e-05	8.1e-12	8.08e-12	---
chr5	81297077	81297077	rs6875409	5_81297077_A_G	5_81538046_T_A	5	old	rs7707921	0.99(0.92-1.06)	0.78	0.92(0.9-0.95)	6.4e-09	0.95(0.93-0.97)	2.5e-05	8.1e-12	7.02e-12	---
chr5	81301825	81301825	rs61024879	5_81301825_AC_A	5_81538046_T_A	5	old	rs7707921	0.99(0.92-1.06)	0.78	0.92(0.9-0.95)	6.4e-09	0.95(0.93-0.97)	2.5e-05	8.1e-12	1.35e-11	---
chr5	81312399	81312399	rs111907176	5_81312399_A_G	5_81538046_T_A	5	old	rs7707921	0.99(0.92-1.06)	0.78	0.92(0.9-0.95)	6.4e-09	0.95(0.93-0.97)	2.5e-05	8.1e-12	8.68e-12	---
chr5	81322547	81322547	rs17243791	5_81322547_A_G	5_81538046_T_A	5	old	rs7707921	0.99(0.92-1.06)	0.78	0.92(0.9-0.95)	6.4e-09	0.95(0.93-0.97)	2.5e-05	8.1e-12	9.83e-12	---
chr5	81326622	81326622	rs73134722	5_81326622_G_A	5_81538046_T_A	5	old	rs7707921	0.99(0.92-1.06)	0.78	0.92(0.9-0.95)	6.4e-09	0.95(0.93-0.97)	2.5e-05	8.1e-12	9.35e-12	---
chr5	81351443	81351443	rs7733122	5_81351443_C_T	5_81538046_T_A	5	old	rs7707921	0.99(0.92-1.06)	0.78	0.92(0.9-0.95)	6.4e-09	0.95(0.93-0.97)	2.5e-05	8.1e-12	1.09e-11	---
chr5	81359709	81359709	rs112413913	5_81359709_A_G	5_81538046_T_A	5	old	rs7707921	0.99(0.92-1.06)	0.78	0.92(0.9-0.95)	6.4e-09	0.95(0.93-0.97)	2.5e-05	8.1e-12	1.22e-11	---
chr5	81359771	81359771	rs5869104	5_81359771_AC_A	5_81538046_T_A	5	old	rs7707921	0.99(0.92-1.06)	0.78	0.92(0.9-0.95)	6.4e-09	0.95(0.93-0.97)	2.5e-05	8.1e-12	1.61e-11	---
chr5	81370760	81370760	rs73134739	5_81370760_T_C	5_81538046_T_A	5	old	rs7707921	0.99(0.92-1.06)	0.78	0.92(0.9-0.95)	6.4e-09	0.95(0.93-0.97)	2.5e-05	8.1e-12	1.07e-11	---
chr5	81371755	81371755	rs12108833	5_81371755_A_G	5_81538046_T_A	5	old	rs7707921	0.99(0.92-1.06)	0.78	0.92(0.9-0.95)	6.4e-09	0.95(0.93-0.97)	2.5e-05	8.1e-12	9e-12	---
chr5	81375335	81375335	rs144580806	5_81375335_A_C	5_81538046_T_A	5	old	rs7707921	0.99(0.92-1.06)	0.78	0.92(0.9-0.95)	6.4e-09	0.95(0.93-0.97)	2.5e-05	8.1e-12	8.07e-12	---
chr5	81377257	81377257	rs190033972	5_81377257_G_A	5_81538046_T_A	5	old	rs7707921	0.99(0.92-1.06)	0.78	0.92(0.9-0.95)	6.4e-09	0.95(0.93-0.97)	2.5e-05	8.1e-12	1.1e-11	---
chr5	81378294	81378294	rs73134747	5_81378294_C_T	5_81538046_T_A	5	old	rs7707921	0.99(0.92-1.06)	0.78	0.92(0.9-0.95)	6.4e-09	0.95(0.93-0.97)	2.5e-05	8.1e-12	1.06e-11	---
chr5	81381997	81381997	rs2629744	5_81381997_A_T	5_81538046_T_A	5	old	rs7707921	0.99(0.92-1.06)	0.78	0.92(0.9-0.95)	6.4e-09	0.95(0.93-0.97)	2.5e-05	8.1e-12	1.17e-11	---
chr5	81385161	81385161	rs111488674	5_81385161_C_CA	5_81538046_T_A	5	old	rs7707921	0.99(0.92-1.06)	0.78	0.92(0.9-0.95)	6.4e-09	0.95(0.93-0.97)	2.5e-05	8.1e-12	6.48e-12	---
chr5	81386035	81386035	rs112355050	5_81386035_C_T	5_81538046_T_A	5	old	rs7707921	0.99(0.92-1.06)	0.78	0.92(0.9-0.95)	6.4e-09	0.95(0.93-0.97)	2.5e-05	8.1e-12	1.19e-11	---
chr5	81389950	81389950	rs324914	5_81389950_T_C	5_81538046_T_A	5	old	rs7707921	0.99(0.92-1.06)	0.78	0.92(0.9-0.95)	6.4e-09	0.95(0.93-0.97)	2.5e-05	8.1e-12	9.47e-12	---
chr5	81395762	81395762	5:81395762	5_81395762_AT_ATT	5_81538046_T_A	5	old	rs7707921	0.99(0.92-1.06)	0.78	0.92(0.9-0.95)	6.4e-09	0.95(0.93-0.97)	2.5e-05	8.1e-12	3.01e-11	---
chr5	81400264	81400264	rs324910	5_81400264_A_C	5_81538046_T_A	5	old	rs7707921	0.99(0.92-1.06)	0.78	0.92(0.9-0.95)	6.4e-09	0.95(0.93-0.97)	2.5e-05	8.1e-12	8.25e-12	---
chr5	81406404	81406404	rs112851871	5_81406404_G_C	5_81538046_T_A	5	old	rs7707921	0.99(0.92-1.06)	0.78	0.92(0.9-0.95)	6.4e-09	0.95(0.93-0.97)	2.5e-05	8.1e-12	1.73e-11	---
chr5	81406770	81406770	rs57621982	5_81406770_C_T	5_81538046_T_A	5	old	rs7707921	0.99(0.92-1.06)	0.78	0.92(0.9-0.95)	6.4e-09	0.95(0.93-0.97)	2.5e-05	8.1e-12	1.13e-11	---
chr5	81425592	81425592	rs4293895	5_81425592_T_C	5_81538046_T_A	5	old	rs7707921	0.99(0.92-1.06)	0.78	0.92(0.9-0.95)	6.4e-09	0.95(0.93-0.97)	2.5e-05	8.1e-12	8.82e-12	---
chr5	81428261	81428261	rs113654433	5_81428261_C_A	5_81538046_T_A	5	old	rs7707921	0.99(0.92-1.06)	0.78	0.92(0.9-0.95)	6.4e-09	0.95(0.93-0.97)	2.5e-05	8.1e-12	1.13e-11	---
chr5	81434479	81434479	rs73136777	5_81434479_T_A	5_81538046_T_A	5	old	rs7707921	0.99(0.92-1.06)	0.78	0.92(0.9-0.95)	6.4e-09	0.95(0.93-0.97)	2.5e-05	8.1e-12	1.01e-11	---
chr5	81434790	81434790	rs141541926	5_81434790_G_C	5_81538046_T_A	5	old	rs7707921	0.99(0.92-1.06)	0.78	0.92(0.9-0.95)	6.4e-09	0.95(0.93-0.97)	2.5e-05	8.1e-12	8.94e-12	---
chr5	81443520	81443520	rs73136782	5_81443520_T_G	5_81538046_T_A	5	old	rs7707921	0.99(0.92-1.06)	0.78	0.92(0.9-0.95)	6.4e-09	0.95(0.93-0.97)	2.5e-05	8.1e-12	1.18e-11	---
chr5	81447995	81447995	rs1428940	5_81447995_A_G	5_81538046_T_A	5	old	rs7707921	0.99(0.92-1.06)	0.78	0.92(0.9-0.95)	6.4e-09	0.95(0.93-0.97)	2.5e-05	8.1e-12	8.88e-12	---
chr5	81448283	81448283	rs60733727	5_81448283_G_A	5_81538046_T_A	5	old	rs7707921	0.99(0.92-1.06)	0.78	0.92(0.9-0.95)	6.4e-09	0.95(0.93-0.97)	2.5e-05	8.1e-12	9e-12	---
chr5	81457358	81457358	rs2407064	5_81457358_C_A	5_81538046_T_A	5	old	rs7707921	0.99(0.92-1.06)	0.78	0.92(0.9-0.95)	6.4e-09	0.95(0.93-0.97)	2.5e-05	8.1e-12	1.19e-12	+++
chr5	81466669	81466669	rs4081859	5_81466669_G_A	5_81538046_T_A	5	old	rs7707921	0.99(0.92-1.06)	0.78	0.92(0.9-0.95)	6.4e-09	0.95(0.93-0.97)	2.5e-05	8.1e-12	7.08e-13	+++
chr5	81469082	81469082	rs17245188	5_81469082_G_T	5_81538046_T_A	5	old	rs7707921	0.99(0.92-1.06)	0.78	0.92(0.9-0.95)	6.4e-09	0.95(0.93-0.97)	2.5e-05	8.1e-12	4.24e-12	---
chr5	81482411	81482411	rs11287973	5_81482411_AT_A	5_81538046_T_A	5	old	rs7707921	0.99(0.92-1.06)	0.78	0.92(0.9-0.95)	6.4e-09	0.95(0.93-0.97)	2.5e-05	8.1e-12	1.15e-12	+++
chr5	81482522	81482522	rs6452447	5_81482522_A_G	5_81538046_T_A	5	old	rs7707921	0.99(0.92-1.06)	0.78	0.92(0.9-0.95)	6.4e-09	0.95(0.93-0.97)	2.5e-05	8.1e-12	3.89e-12	+++
chr5	81491087	81491087	rs891159	5_81491087_G_A	5_81538046_T_A	5	old	rs7707921	0.99(0.92-1.06)	0.78	0.92(0.9-0.95)	6.4e-09	0.95(0.93-0.97)	2.5e-05	8.1e-12	8.93e-13	+++
chr5	81492643	81492643	rs4703870	5_81492643_G_A	5_81538046_T_A	5	old	rs7707921	0.99(0.92-1.06)	0.78	0.92(0.9-0.95)	6.4e-09	0.95(0.93-0.97)	2.5e-05	8.1e-12	1.11e-12	+++
chr5	81504600	81504600	rs79616997	5_81504600_G_T	5_81538046_T_A	5	old	rs7707921	0.99(0.92-1.06)	0.78	0.92(0.9-0.95)	6.4e-09	0.95(0.93-0.97)	2.5e-05	8.1e-12	1.08e-12	---
chr5	81504841	81504841	rs1543911	5_81504841_C_T	5_81538046_T_A	5	old	rs7707921	0.99(0.92-1.06)	0.78	0.92(0.9-0.95)	6.4e-09	0.95(0.93-0.97)	2.5e-05	8.1e-12	7.22e-12	+++
chr5	81508792	81508792	rs2059891	5_81508792_G_C	5_81538046_T_A	5	old	rs7707921	0.99(0.92-1.06)	0.78	0.92(0.9-0.95)	6.4e-09	0.95(0.93-0.97)	2.5e-05	8.1e-12	8.53e-13	+++
chr5	81512947	81512947	rs146817970	5_81512947_TA_T	5_81538046_T_A	5	old	rs7707921	0.99(0.92-1.06)	0.78	0.92(0.9-0.95)	6.4e-09	0.95(0.93-0.97)	2.5e-05	8.1e-12	4.19e-13	---
chr5	81533735	81533735	rs6888977	5_81533735_C_T	5_81538046_T_A	5	old	rs7707921	0.99(0.92-1.06)	0.78	0.92(0.9-0.95)	6.4e-09	0.95(0.93-0.97)	2.5e-05	8.1e-12	3.36e-12	+++
chr5	81538046	81538046	rs7707921	5_81538046_T_A	5_81538046_T_A	5	old	rs7707921	0.99(0.92-1.06)	0.78	0.92(0.9-0.95)	6.4e-09	0.95(0.93-0.97)	2.5e-05	8.1e-12	1.69e-12	+++
chr5	81550043	81550043	rs6884232	5_81550043_G_A	5_81538046_T_A	5	old	rs7707921	0.99(0.92-1.06)	0.78	0.92(0.9-0.95)	6.4e-09	0.95(0.93-0.97)	2.5e-05	8.1e-12	2.05e-12	+++
chr5	81550377	81550377	rs34815248	5_81550377_CG_C	5_81538046_T_A	5	old	rs7707921	0.99(0.92-1.06)	0.78	0.92(0.9-0.95)	6.4e-09	0.95(0.93-0.97)	2.5e-05	8.1e-12	2.18e-12	+++
chr5	81551659	81551659	rs1019806	5_81551659_G_A	5_81538046_T_A	5	old	rs7707921	0.99(0.92-1.06)	0.78	0.92(0.9-0.95)	6.4e-09	0.95(0.93-0.97)	2.5e-05	8.1e-12	1.07e-12	+++
chr5	81553815	81553815	rs4703879	5_81553815_A_G	5_81538046_T_A	5	old	rs7707921	0.99(0.92-1.06)	0.78	0.92(0.9-0.95)	6.4e-09	0.95(0.93-0.97)	2.5e-05	8.1e-12	1.69e-12	+++
chr5	81555328	81555328	rs2407153	5_81555328_T_G	5_81538046_T_A	5	old	rs7707921	0.99(0.92-1.06)	0.78	0.92(0.9-0.95)	6.4e-09	0.95(0.93-0.97)	2.5e-05	8.1e-12	2.48e-12	+++
chr5	81561325	81561325	rs749402	5_81561325_C_T	5_81538046_T_A	5	old	rs7707921	0.99(0.92-1.06)	0.78	0.92(0.9-0.95)	6.4e-09	0.95(0.93-0.97)	2.5e-05	8.1e-12	2.78e-12	---
chr5	81561369	81561369	rs749401	5_81561369_T_C	5_81538046_T_A	5	old	rs7707921	0.99(0.92-1.06)	0.78	0.92(0.9-0.95)	6.4e-09	0.95(0.93-0.97)	2.5e-05	8.1e-12	2.97e-12	---
chr5	81562141	81562141	rs113587470	5_81562141_ATCCT_A	5_81538046_T_A	5	old	rs7707921	0.99(0.92-1.06)	0.78	0.92(0.9-0.95)	6.4e-09	0.95(0.93-0.97)	2.5e-05	8.1e-12	5.67e-12	---
chr5	90653868	90653868	rs6452951	5_90653868_T_G	5_90732225_C_T	5	old	rs10474352	0.98(0.9-1.06)	0.56	0.92(0.89-0.95)	1.1e-06	0.94(0.91-0.96)	3.1e-06	3.4e-11	4.62e-11	---
chr5	90658392	90658392	rs10942634	5_90658392_A_T	5_90732225_C_T	5	old	rs10474352	0.98(0.9-1.06)	0.56	0.92(0.89-0.95)	1.1e-06	0.94(0.91-0.96)	3.1e-06	3.4e-11	4.5e-11	---
chr5	90659329	90659329	rs7720235	5_90659329_A_T	5_90732225_C_T	5	old	rs10474352	0.98(0.9-1.06)	0.56	0.92(0.89-0.95)	1.1e-06	0.94(0.91-0.96)	3.1e-06	3.4e-11	4.86e-11	---
chr5	90660167	90660167	rs200529126	5_90660167_CAA_C	5_90732225_C_T	5	old	rs10474352	0.98(0.9-1.06)	0.56	0.92(0.89-0.95)	1.1e-06	0.94(0.91-0.96)	3.1e-06	3.4e-11	6.03e-11	---
chr5	90660447	90660447	rs1541674	5_90660447_T_C	5_90732225_C_T	5	old	rs10474352	0.98(0.9-1.06)	0.56	0.92(0.89-0.95)	1.1e-06	0.94(0.91-0.96)	3.1e-06	3.4e-11	6.77e-11	---
chr5	90662839	90662839	rs12110303	5_90662839_G_T	5_90732225_C_T	5	old	rs10474352	0.98(0.9-1.06)	0.56	0.92(0.89-0.95)	1.1e-06	0.94(0.91-0.96)	3.1e-06	3.4e-11	1.24e-11	---
chr5	90664322	90664322	rs6869048	5_90664322_G_C	5_90732225_C_T	5	old	rs10474352	0.98(0.9-1.06)	0.56	0.92(0.89-0.95)	1.1e-06	0.94(0.91-0.96)	3.1e-06	3.4e-11	4.51e-11	---
chr5	90669352	90669352	rs6866923	5_90669352_A_C	5_90732225_C_T	5	old	rs10474352	0.98(0.9-1.06)	0.56	0.92(0.89-0.95)	1.1e-06	0.94(0.91-0.96)	3.1e-06	3.4e-11	5.22e-11	---
chr5	90671274	90671274	rs1363839	5_90671274_A_T	5_90732225_C_T	5	old	rs10474352	0.98(0.9-1.06)	0.56	0.92(0.89-0.95)	1.1e-06	0.94(0.91-0.96)	3.1e-06	3.4e-11	6.36e-11	---
chr5	90679504	90679504	rs7715402	5_90679504_T_A	5_90732225_C_T	5	old	rs10474352	0.98(0.9-1.06)	0.56	0.92(0.89-0.95)	1.1e-06	0.94(0.91-0.96)	3.1e-06	3.4e-11	7.79e-11	---
chr5	90679519	90679519	rs35712350	5_90679519_C_T	5_90732225_C_T	5	old	rs10474352	0.98(0.9-1.06)	0.56	0.92(0.89-0.95)	1.1e-06	0.94(0.91-0.96)	3.1e-06	3.4e-11	7.98e-11	---
chr5	90680468	90680468	rs11948056	5_90680468_A_C	5_90732225_C_T	5	old	rs10474352	0.98(0.9-1.06)	0.56	0.92(0.89-0.95)	1.1e-06	0.94(0.91-0.96)	3.1e-06	3.4e-11	6.56e-11	---
chr5	90680579	90680579	rs11948075	5_90680579_A_G	5_90732225_C_T	5	old	rs10474352	0.98(0.9-1.06)	0.56	0.92(0.89-0.95)	1.1e-06	0.94(0.91-0.96)	3.1e-06	3.4e-11	6.29e-11	---
chr5	90680949	90680949	rs7705465	5_90680949_G_A	5_90732225_C_T	5	old	rs10474352	0.98(0.9-1.06)	0.56	0.92(0.89-0.95)	1.1e-06	0.94(0.91-0.96)	3.1e-06	3.4e-11	5.87e-11	---
chr5	90681637	90681637	rs746637	5_90681637_C_G	5_90732225_C_T	5	old	rs10474352	0.98(0.9-1.06)	0.56	0.92(0.89-0.95)	1.1e-06	0.94(0.91-0.96)	3.1e-06	3.4e-11	6.08e-11	---
chr5	90682151	90682151	rs889213	5_90682151_C_T	5_90732225_C_T	5	old	rs10474352	0.98(0.9-1.06)	0.56	0.92(0.89-0.95)	1.1e-06	0.94(0.91-0.96)	3.1e-06	3.4e-11	6.21e-11	---
chr5	90686568	90686568	rs2367353	5_90686568_G_C	5_90732225_C_T	5	old	rs10474352	0.98(0.9-1.06)	0.56	0.92(0.89-0.95)	1.1e-06	0.94(0.91-0.96)	3.1e-06	3.4e-11	8.09e-11	---
chr5	90688740	90688740	rs11950530	5_90688740_A_G	5_90732225_C_T	5	old	rs10474352	0.98(0.9-1.06)	0.56	0.92(0.89-0.95)	1.1e-06	0.94(0.91-0.96)	3.1e-06	3.4e-11	5.94e-11	---
chr5	90689052	90689052	rs10058025	5_90689052_A_G	5_90732225_C_T	5	old	rs10474352	0.98(0.9-1.06)	0.56	0.92(0.89-0.95)	1.1e-06	0.94(0.91-0.96)	3.1e-06	3.4e-11	5.94e-11	---
chr5	90689749	90689749	rs10073657	5_90689749_G_A	5_90732225_C_T	5	old	rs10474352	0.98(0.9-1.06)	0.56	0.92(0.89-0.95)	1.1e-06	0.94(0.91-0.96)	3.1e-06	3.4e-11	7.24e-11	---
chr5	90694797	90694797	rs6869717	5_90694797_G_A	5_90732225_C_T	5	old	rs10474352	0.98(0.9-1.06)	0.56	0.92(0.89-0.95)	1.1e-06	0.94(0.91-0.96)	3.1e-06	3.4e-11	5.49e-11	---
chr5	90696199	90696199	rs1966494	5_90696199_T_C	5_90732225_C_T	5	old	rs10474352	0.98(0.9-1.06)	0.56	0.92(0.89-0.95)	1.1e-06	0.94(0.91-0.96)	3.1e-06	3.4e-11	8.29e-11	---
chr5	90696297	90696297	rs6860948	5_90696297_T_G	5_90732225_C_T	5	old	rs10474352	0.98(0.9-1.06)	0.56	0.92(0.89-0.95)	1.1e-06	0.94(0.91-0.96)	3.1e-06	3.4e-11	8.66e-11	---
chr5	90703840	90703840	rs11959525	5_90703840_A_G	5_90732225_C_T	5	old	rs10474352	0.98(0.9-1.06)	0.56	0.92(0.89-0.95)	1.1e-06	0.94(0.91-0.96)	3.1e-06	3.4e-11	6.02e-11	---
chr5	90707773	90707773	rs1477349	5_90707773_G_A	5_90732225_C_T	5	old	rs10474352	0.98(0.9-1.06)	0.56	0.92(0.89-0.95)	1.1e-06	0.94(0.91-0.96)	3.1e-06	3.4e-11	6.27e-11	---
chr5	90707823	90707823	rs1477348	5_90707823_G_A	5_90732225_C_T	5	old	rs10474352	0.98(0.9-1.06)	0.56	0.92(0.89-0.95)	1.1e-06	0.94(0.91-0.96)	3.1e-06	3.4e-11	6.27e-11	---
chr5	90712123	90712123	rs6882269	5_90712123_A_G	5_90732225_C_T	5	old	rs10474352	0.98(0.9-1.06)	0.56	0.92(0.89-0.95)	1.1e-06	0.94(0.91-0.96)	3.1e-06	3.4e-11	7.49e-11	---
chr5	90713259	90713259	rs12654787	5_90713259_C_T	5_90732225_C_T	5	old	rs10474352	0.98(0.9-1.06)	0.56	0.92(0.89-0.95)	1.1e-06	0.94(0.91-0.96)	3.1e-06	3.4e-11	5.45e-11	---
chr5	90714595	90714595	rs10063683	5_90714595_G_A	5_90732225_C_T	5	old	rs10474352	0.98(0.9-1.06)	0.56	0.92(0.89-0.95)	1.1e-06	0.94(0.91-0.96)	3.1e-06	3.4e-11	5.18e-11	---
chr5	90717675	90717675	rs10045280	5_90717675_T_A	5_90732225_C_T	5	old	rs10474352	0.98(0.9-1.06)	0.56	0.92(0.89-0.95)	1.1e-06	0.94(0.91-0.96)	3.1e-06	3.4e-11	5.18e-11	---
chr5	90718008	90718008	rs6867219	5_90718008_T_G	5_90732225_C_T	5	old	rs10474352	0.98(0.9-1.06)	0.56	0.92(0.89-0.95)	1.1e-06	0.94(0.91-0.96)	3.1e-06	3.4e-11	5.99e-11	---
chr5	90718009	90718009	rs6867220	5_90718009_T_A	5_90732225_C_T	5	old	rs10474352	0.98(0.9-1.06)	0.56	0.92(0.89-0.95)	1.1e-06	0.94(0.91-0.96)	3.1e-06	3.4e-11	5.99e-11	---
chr5	90718474	90718474	rs12110065	5_90718474_A_G	5_90732225_C_T	5	old	rs10474352	0.98(0.9-1.06)	0.56	0.92(0.89-0.95)	1.1e-06	0.94(0.91-0.96)	3.1e-06	3.4e-11	8.74e-11	---
chr5	90718517	90718517	rs7708782	5_90718517_T_C	5_90732225_C_T	5	old	rs10474352	0.98(0.9-1.06)	0.56	0.92(0.89-0.95)	1.1e-06	0.94(0.91-0.96)	3.1e-06	3.4e-11	6.15e-11	---
chr5	90723034	90723034	rs6452953	5_90723034_T_G	5_90732225_C_T	5	old	rs10474352	0.98(0.9-1.06)	0.56	0.92(0.89-0.95)	1.1e-06	0.94(0.91-0.96)	3.1e-06	3.4e-11	5.37e-11	---
chr5	90724598	90724598	rs6862125	5_90724598_T_C	5_90732225_C_T	5	old	rs10474352	0.98(0.9-1.06)	0.56	0.92(0.89-0.95)	1.1e-06	0.94(0.91-0.96)	3.1e-06	3.4e-11	4.27e-11	---
chr5	90726205	90726205	rs2004483	5_90726205_C_T	5_90732225_C_T	5	old	rs10474352	0.98(0.9-1.06)	0.56	0.92(0.89-0.95)	1.1e-06	0.94(0.91-0.96)	3.1e-06	3.4e-11	4.46e-11	---
chr5	90726449	90726449	rs35945986	5_90726449_CT_C	5_90732225_C_T	5	old	rs10474352	0.98(0.9-1.06)	0.56	0.92(0.89-0.95)	1.1e-06	0.94(0.91-0.96)	3.1e-06	3.4e-11	1.32e-10	---
chr5	90727412	90727412	rs2839728	5_90727412_G_A	5_90732225_C_T	5	old	rs10474352	0.98(0.9-1.06)	0.56	0.92(0.89-0.95)	1.1e-06	0.94(0.91-0.96)	3.1e-06	3.4e-11	5.08e-11	---
chr5	90727692	90727692	rs60513756	5_90727692_A_C	5_90732225_C_T	5	old	rs10474352	0.98(0.9-1.06)	0.56	0.92(0.89-0.95)	1.1e-06	0.94(0.91-0.96)	3.1e-06	3.4e-11	4.44e-11	---
chr5	90729592	90729592	rs12651840	5_90729592_T_C	5_90732225_C_T	5	old	rs10474352	0.98(0.9-1.06)	0.56	0.92(0.89-0.95)	1.1e-06	0.94(0.91-0.96)	3.1e-06	3.4e-11	5.27e-11	---
chr5	90729906	90729906	rs2052553	5_90729906_C_T	5_90732225_C_T	5	old	rs10474352	0.98(0.9-1.06)	0.56	0.92(0.89-0.95)	1.1e-06	0.94(0.91-0.96)	3.1e-06	3.4e-11	4.8e-11	---
chr5	90730852	90730852	rs5869545	5_90730852_A_AT	5_90732225_C_T	5	old	rs10474352	0.98(0.9-1.06)	0.56	0.92(0.89-0.95)	1.1e-06	0.94(0.91-0.96)	3.1e-06	3.4e-11	1.01e-10	---
chr5	90731931	90731931	rs2059207	5_90731931_C_A	5_90732225_C_T	5	old	rs10474352	0.98(0.9-1.06)	0.56	0.92(0.89-0.95)	1.1e-06	0.94(0.91-0.96)	3.1e-06	3.4e-11	5.64e-11	---
chr5	90732065	90732065	rs2059208	5_90732065_T_A	5_90732225_C_T	5	old	rs10474352	0.98(0.9-1.06)	0.56	0.92(0.89-0.95)	1.1e-06	0.94(0.91-0.96)	3.1e-06	3.4e-11	5.15e-11	---
chr5	90732225	90732225	rs10474352	5_90732225_C_T	5_90732225_C_T	5	old	rs10474352	0.98(0.9-1.06)	0.56	0.92(0.89-0.95)	1.1e-06	0.94(0.91-0.96)	3.1e-06	3.4e-11	4.52e-11	---
chr5	90732285	90732285	rs10474353	5_90732285_A_C	5_90732225_C_T	5	old	rs10474352	0.98(0.9-1.06)	0.56	0.92(0.89-0.95)	1.1e-06	0.94(0.91-0.96)	3.1e-06	3.4e-11	5.35e-11	---
chr5	90734333	90734333	rs6867091	5_90734333_C_G	5_90732225_C_T	5	old	rs10474352	0.98(0.9-1.06)	0.56	0.92(0.89-0.95)	1.1e-06	0.94(0.91-0.96)	3.1e-06	3.4e-11	4.24e-11	---
chr5	90735692	90735692	rs6452954	5_90735692_G_A	5_90732225_C_T	5	old	rs10474352	0.98(0.9-1.06)	0.56	0.92(0.89-0.95)	1.1e-06	0.94(0.91-0.96)	3.1e-06	3.4e-11	7.05e-11	---
chr5	90736537	90736537	rs12655973	5_90736537_T_C	5_90732225_C_T	5	old	rs10474352	0.98(0.9-1.06)	0.56	0.92(0.89-0.95)	1.1e-06	0.94(0.91-0.96)	3.1e-06	3.4e-11	6.14e-11	---
chr5	90737845	90737845	rs9293568	5_90737845_C_T	5_90732225_C_T	5	old	rs10474352	0.98(0.9-1.06)	0.56	0.92(0.89-0.95)	1.1e-06	0.94(0.91-0.96)	3.1e-06	3.4e-11	4.69e-11	---
chr5	90738948	90738948	rs10041402	5_90738948_A_T	5_90732225_C_T	5	old	rs10474352	0.98(0.9-1.06)	0.56	0.92(0.89-0.95)	1.1e-06	0.94(0.91-0.96)	3.1e-06	3.4e-11	5.98e-11	---
chr5	90740406	90740406	rs10054820	5_90740406_C_T	5_90732225_C_T	5	old	rs10474352	0.98(0.9-1.06)	0.56	0.92(0.89-0.95)	1.1e-06	0.94(0.91-0.96)	3.1e-06	3.4e-11	4.74e-11	---
chr5	90740417	90740417	rs9686361	5_90740417_C_T	5_90732225_C_T	5	old	rs10474352	0.98(0.9-1.06)	0.56	0.92(0.89-0.95)	1.1e-06	0.94(0.91-0.96)	3.1e-06	3.4e-11	4.74e-11	---
chr5	90740495	90740495	rs370457338	5_90740495_CTT_C	5_90732225_C_T	5	old	rs10474352	0.98(0.9-1.06)	0.56	0.92(0.89-0.95)	1.1e-06	0.94(0.91-0.96)	3.1e-06	3.4e-11	1.69e-10	---
chr5	90740525	90740525	rs2367526	5_90740525_A_G	5_90732225_C_T	5	old	rs10474352	0.98(0.9-1.06)	0.56	0.92(0.89-0.95)	1.1e-06	0.94(0.91-0.96)	3.1e-06	3.4e-11	4.74e-11	---
chr5	90740531	90740531	rs2887007	5_90740531_A_T	5_90732225_C_T	5	old	rs10474352	0.98(0.9-1.06)	0.56	0.92(0.89-0.95)	1.1e-06	0.94(0.91-0.96)	3.1e-06	3.4e-11	6.75e-11	---
chr5	90741470	90741470	rs61612071	5_90741470_G_A	5_90732225_C_T	5	old	rs10474352	0.98(0.9-1.06)	0.56	0.92(0.89-0.95)	1.1e-06	0.94(0.91-0.96)	3.1e-06	3.4e-11	4.79e-11	---
chr5	90742188	90742188	rs10073935	5_90742188_A_G	5_90732225_C_T	5	old	rs10474352	0.98(0.9-1.06)	0.56	0.92(0.89-0.95)	1.1e-06	0.94(0.91-0.96)	3.1e-06	3.4e-11	6.08e-11	---
chr5	90742444	90742444	rs10059163	5_90742444_C_T	5_90732225_C_T	5	old	rs10474352	0.98(0.9-1.06)	0.56	0.92(0.89-0.95)	1.1e-06	0.94(0.91-0.96)	3.1e-06	3.4e-11	6.1e-11	---
chr5	90743325	90743325	rs1035477	5_90743325_T_C	5_90732225_C_T	5	old	rs10474352	0.98(0.9-1.06)	0.56	0.92(0.89-0.95)	1.1e-06	0.94(0.91-0.96)	3.1e-06	3.4e-11	4.82e-11	---
chr5	90743608	90743608	rs1964292	5_90743608_T_C	5_90732225_C_T	5	old	rs10474352	0.98(0.9-1.06)	0.56	0.92(0.89-0.95)	1.1e-06	0.94(0.91-0.96)	3.1e-06	3.4e-11	4.85e-11	---
chr5	90743854	90743854	rs1895448	5_90743854_C_T	5_90732225_C_T	5	old	rs10474352	0.98(0.9-1.06)	0.56	0.92(0.89-0.95)	1.1e-06	0.94(0.91-0.96)	3.1e-06	3.4e-11	5.74e-11	---
chr5	90744106	90744106	rs1895449	5_90744106_A_G	5_90732225_C_T	5	old	rs10474352	0.98(0.9-1.06)	0.56	0.92(0.89-0.95)	1.1e-06	0.94(0.91-0.96)	3.1e-06	3.4e-11	5.12e-11	---
chr5	90744228	90744228	rs4382199	5_90744228_A_G	5_90732225_C_T	5	old	rs10474352	0.98(0.9-1.06)	0.56	0.92(0.89-0.95)	1.1e-06	0.94(0.91-0.96)	3.1e-06	3.4e-11	4.68e-11	---
chr5	90744509	90744509	rs985434	5_90744509_A_G	5_90732225_C_T	5	old	rs10474352	0.98(0.9-1.06)	0.56	0.92(0.89-0.95)	1.1e-06	0.94(0.91-0.96)	3.1e-06	3.4e-11	4.68e-11	---
chr5	90745105	90745105	rs7720132	5_90745105_T_C	5_90732225_C_T	5	old	rs10474352	0.98(0.9-1.06)	0.56	0.92(0.89-0.95)	1.1e-06	0.94(0.91-0.96)	3.1e-06	3.4e-11	4.71e-11	---
chr5	90745247	90745247	rs3214468	5_90745247_T_TA	5_90732225_C_T	5	old	rs10474352	0.98(0.9-1.06)	0.56	0.92(0.89-0.95)	1.1e-06	0.94(0.91-0.96)	3.1e-06	3.4e-11	9.33e-11	---
chr5	90745976	90745976	rs1035476	5_90745976_G_A	5_90732225_C_T	5	old	rs10474352	0.98(0.9-1.06)	0.56	0.92(0.89-0.95)	1.1e-06	0.94(0.91-0.96)	3.1e-06	3.4e-11	8.61e-11	---
chr5	90746424	90746424	rs6865495	5_90746424_G_A	5_90732225_C_T	5	old	rs10474352	0.98(0.9-1.06)	0.56	0.92(0.89-0.95)	1.1e-06	0.94(0.91-0.96)	3.1e-06	3.4e-11	6.71e-11	---
chr5	90746852	90746852	rs6866191	5_90746852_G_A	5_90732225_C_T	5	old	rs10474352	0.98(0.9-1.06)	0.56	0.92(0.89-0.95)	1.1e-06	0.94(0.91-0.96)	3.1e-06	3.4e-11	4.79e-11	---
chr5	90747018	90747018	rs10715060	5_90747018_GA_G	5_90732225_C_T	5	old	rs10474352	0.98(0.9-1.06)	0.56	0.92(0.89-0.95)	1.1e-06	0.94(0.91-0.96)	3.1e-06	3.4e-11	4.39e-11	---
chr5	90750550	90750550	rs58520375	5_90750550_AAATGAAAC_A	5_90732225_C_T	5	old	rs10474352	0.98(0.9-1.06)	0.56	0.92(0.89-0.95)	1.1e-06	0.94(0.91-0.96)	3.1e-06	3.4e-11	9.27e-11	---
chr5	90751343	90751343	rs12656350	5_90751343_C_T	5_90732225_C_T	5	old	rs10474352	0.98(0.9-1.06)	0.56	0.92(0.89-0.95)	1.1e-06	0.94(0.91-0.96)	3.1e-06	3.4e-11	5.28e-11	---
chr5	90752351	90752351	rs1423593	5_90752351_T_G	5_90732225_C_T	5	old	rs10474352	0.98(0.9-1.06)	0.56	0.92(0.89-0.95)	1.1e-06	0.94(0.91-0.96)	3.1e-06	3.4e-11	3.53e-11	---
chr5	90756536	90756536	rs141065988	5_90756536_T_TGTAA	5_90732225_C_T	5	old	rs10474352	0.98(0.9-1.06)	0.56	0.92(0.89-0.95)	1.1e-06	0.94(0.91-0.96)	3.1e-06	3.4e-11	9.21e-11	---
chr5	90757886	90757886	5:90757886	5_90757886_G_A	5_90732225_C_T	5	old	rs10474352	0.98(0.9-1.06)	0.56	0.92(0.89-0.95)	1.1e-06	0.94(0.91-0.96)	3.1e-06	3.4e-11	1.61e-11	---
chr5	90759930	90759930	rs10052492	5_90759930_T_A	5_90732225_C_T	5	old	rs10474352	0.98(0.9-1.06)	0.56	0.92(0.89-0.95)	1.1e-06	0.94(0.91-0.96)	3.1e-06	3.4e-11	3.14e-11	---
chr5	90762748	90762748	rs933688	5_90762748_G_A	5_90732225_C_T	5	old	rs10474352	0.98(0.9-1.06)	0.56	0.92(0.89-0.95)	1.1e-06	0.94(0.91-0.96)	3.1e-06	3.4e-11	4.24e-11	---
chr5	90765632	90765632	rs12188467	5_90765632_A_T	5_90732225_C_T	5	old	rs10474352	0.98(0.9-1.06)	0.56	0.92(0.89-0.95)	1.1e-06	0.94(0.91-0.96)	3.1e-06	3.4e-11	4.09e-11	---
chr5	90775399	90775399	rs33997916	5_90775399_T_TCAAA	5_90732225_C_T	5	old	rs10474352	0.98(0.9-1.06)	0.56	0.92(0.89-0.95)	1.1e-06	0.94(0.91-0.96)	3.1e-06	3.4e-11	1.79e-10	---
chr5	90778848	90778848	rs332544	5_90778848_G_A	5_90732225_C_T	5	old	rs10474352	0.98(0.9-1.06)	0.56	0.92(0.89-0.95)	1.1e-06	0.94(0.91-0.96)	3.1e-06	3.4e-11	3.57e-11	---
chr5	90780467	90780467	rs186717	5_90780467_T_A	5_90732225_C_T	5	old	rs10474352	0.98(0.9-1.06)	0.56	0.92(0.89-0.95)	1.1e-06	0.94(0.91-0.96)	3.1e-06	3.4e-11	3.67e-11	---
chr5	90789470	90789470	rs332529	5_90789470_G_A	5_90732225_C_T	5	old	rs10474352	0.98(0.9-1.06)	0.56	0.92(0.89-0.95)	1.1e-06	0.94(0.91-0.96)	3.1e-06	3.4e-11	9.02e-12	---
chr5	90789810	90789810	rs332530	5_90789810_G_T	5_90732225_C_T	5	old	rs10474352	0.98(0.9-1.06)	0.56	0.92(0.89-0.95)	1.1e-06	0.94(0.91-0.96)	3.1e-06	3.4e-11	2.31e-11	---
chr5	90790451	90790451	rs332531	5_90790451_G_C	5_90732225_C_T	5	old	rs10474352	0.98(0.9-1.06)	0.56	0.92(0.89-0.95)	1.1e-06	0.94(0.91-0.96)	3.1e-06	3.4e-11	2.57e-11	---
chr5	111103258	111103258	rs255888	5_111103258_C_T	5_111217786_G_T	5	new	rs6882649	0.96(0.9-1.02)	0.2	0.96(0.94-0.98)	0.00052	0.97(0.95-0.99)	0.008	7.8e-06	7.59e-08	+++
chr5	111114379	111114379	rs166253	5_111114379_G_T	5_111217786_G_T	5	new	rs6882649	0.96(0.9-1.02)	0.2	0.96(0.94-0.98)	0.00052	0.97(0.95-0.99)	0.008	7.8e-06	1.37e-08	---
chr5	111130863	111130863	rs652358	5_111130863_G_A	5_111217786_G_T	5	new	rs6882649	0.96(0.9-1.02)	0.2	0.96(0.94-0.98)	0.00052	0.97(0.95-0.99)	0.008	7.8e-06	6.38e-08	---
chr5	111131114	111131114	rs693553	5_111131114_G_C	5_111217786_G_T	5	new	rs6882649	0.96(0.9-1.02)	0.2	0.96(0.94-0.98)	0.00052	0.97(0.95-0.99)	0.008	7.8e-06	8.4e-08	---
chr5	111180974	111180974	rs34082231	5_111180974_CT_CTT	5_111217786_G_T	5	new	rs6882649	0.96(0.9-1.02)	0.2	0.96(0.94-0.98)	0.00052	0.97(0.95-0.99)	0.008	7.8e-06	2.38e-07	---
chr5	111184593	111184593	rs6864217	5_111184593_T_C	5_111217786_G_T	5	new	rs6882649	0.96(0.9-1.02)	0.2	0.96(0.94-0.98)	0.00052	0.97(0.95-0.99)	0.008	7.8e-06	1.99e-07	+++
chr5	111191577	111191577	rs1982901	5_111191577_A_G	5_111217786_G_T	5	new	rs6882649	0.96(0.9-1.02)	0.2	0.96(0.94-0.98)	0.00052	0.97(0.95-0.99)	0.008	7.8e-06	1.77e-07	---
chr5	111198847	111198847	rs34698740	5_111198847_G_T	5_111217786_G_T	5	new	rs6882649	0.96(0.9-1.02)	0.2	0.96(0.94-0.98)	0.00052	0.97(0.95-0.99)	0.008	7.8e-06	1.31e-08	+++
chr5	111201566	111201566	rs11241141	5_111201566_G_A	5_111217786_G_T	5	new	rs6882649	0.96(0.9-1.02)	0.2	0.96(0.94-0.98)	0.00052	0.97(0.95-0.99)	0.008	7.8e-06	1.61e-07	---
chr5	111202681	111202681	rs62371611	5_111202681_G_A	5_111217786_G_T	5	new	rs6882649	0.96(0.9-1.02)	0.2	0.96(0.94-0.98)	0.00052	0.97(0.95-0.99)	0.008	7.8e-06	2e-07	+++
chr5	111204152	111204152	rs1027359	5_111204152_C_T	5_111217786_G_T	5	new	rs6882649	0.96(0.9-1.02)	0.2	0.96(0.94-0.98)	0.00052	0.97(0.95-0.99)	0.008	7.8e-06	1.03e-07	+++
chr5	111205268	111205268	rs10073581	5_111205268_T_C	5_111217786_G_T	5	new	rs6882649	0.96(0.9-1.02)	0.2	0.96(0.94-0.98)	0.00052	0.97(0.95-0.99)	0.008	7.8e-06	9.81e-08	+++
chr5	111214221	111214221	rs10477474	5_111214221_G_A	5_111217786_G_T	5	new	rs6882649	0.96(0.9-1.02)	0.2	0.96(0.94-0.98)	0.00052	0.97(0.95-0.99)	0.008	7.8e-06	4.08e-08	+++
chr5	111215336	111215336	rs6594554	5_111215336_C_G	5_111217786_G_T	5	new	rs6882649	0.96(0.9-1.02)	0.2	0.96(0.94-0.98)	0.00052	0.97(0.95-0.99)	0.008	7.8e-06	5.2e-09	+++
chr5	111215352	111215352	rs6594555	5_111215352_G_A	5_111217786_G_T	5	new	rs6882649	0.96(0.9-1.02)	0.2	0.96(0.94-0.98)	0.00052	0.97(0.95-0.99)	0.008	7.8e-06	3.62e-08	+++
chr5	111215694	111215694	rs6594556	5_111215694_G_C	5_111217786_G_T	5	new	rs6882649	0.96(0.9-1.02)	0.2	0.96(0.94-0.98)	0.00052	0.97(0.95-0.99)	0.008	7.8e-06	5.7e-08	+++
chr5	111216427	111216427	rs140190021	5_111216427_CTTT_C	5_111217786_G_T	5	new	rs6882649	0.96(0.9-1.02)	0.2	0.96(0.94-0.98)	0.00052	0.97(0.95-0.99)	0.008	7.8e-06	3.81e-09	+++
chr5	111216595	111216595	rs10077865	5_111216595_C_T	5_111217786_G_T	5	new	rs6882649	0.96(0.9-1.02)	0.2	0.96(0.94-0.98)	0.00052	0.97(0.95-0.99)	0.008	7.8e-06	6.12e-09	+++
chr5	111216705	111216705	rs11959949	5_111216705_C_T	5_111217786_G_T	5	new	rs6882649	0.96(0.9-1.02)	0.2	0.96(0.94-0.98)	0.00052	0.97(0.95-0.99)	0.008	7.8e-06	2.87e-07	---
chr5	111216886	111216886	rs2661418	5_111216886_C_T	5_111217786_G_T	5	new	rs6882649	0.96(0.9-1.02)	0.2	0.96(0.94-0.98)	0.00052	0.97(0.95-0.99)	0.008	7.8e-06	2.7e-07	---
chr5	111216887	111216887	rs2642679	5_111216887_A_G	5_111217786_G_T	5	new	rs6882649	0.96(0.9-1.02)	0.2	0.96(0.94-0.98)	0.00052	0.97(0.95-0.99)	0.008	7.8e-06	2.78e-07	---
chr5	111217252	111217252	rs7720931	5_111217252_A_G	5_111217786_G_T	5	new	rs6882649	0.96(0.9-1.02)	0.2	0.96(0.94-0.98)	0.00052	0.97(0.95-0.99)	0.008	7.8e-06	1.27e-07	+++
chr5	111217566	111217566	rs1091890	5_111217566_C_T	5_111217786_G_T	5	new	rs6882649	0.96(0.9-1.02)	0.2	0.96(0.94-0.98)	0.00052	0.97(0.95-0.99)	0.008	7.8e-06	1.1e-07	---
chr5	111217786	111217786	rs6882649	5_111217786_G_T	5_111217786_G_T	5	new	rs6882649	0.96(0.9-1.02)	0.2	0.96(0.94-0.98)	0.00052	0.97(0.95-0.99)	0.008	7.8e-06	3.67e-09	+++
chr5	111222354	111222354	rs785344	5_111222354_T_A	5_111217786_G_T	5	new	rs6882649	0.96(0.9-1.02)	0.2	0.96(0.94-0.98)	0.00052	0.97(0.95-0.99)	0.008	7.8e-06	2.24e-07	---
chr5	132375335	132375335	rs62381945	5_132375335_T_C	5_132407058_C_T	5	new	rs6596100	0.95(0.88-1.02)	0.13	0.95(0.92-0.98)	0.0008	0.94(0.92-0.96)	6.4e-08	7.7e-11	2.85e-08	---
chr5	132375622	132375622	rs113638840	5_132375622_A_G	5_132407058_C_T	5	new	rs6596100	0.95(0.88-1.02)	0.13	0.95(0.92-0.98)	0.0008	0.94(0.92-0.96)	6.4e-08	7.7e-11	5.12e-07	---
chr5	132376484	132376484	rs374081570	5_132376484_GAT_G	5_132407058_C_T	5	new	rs6596100	0.95(0.88-1.02)	0.13	0.95(0.92-0.98)	0.0008	0.94(0.92-0.96)	6.4e-08	7.7e-11	9.53e-09	---
chr5	132376625	132376625	rs11739579	5_132376625_C_T	5_132407058_C_T	5	new	rs6596100	0.95(0.88-1.02)	0.13	0.95(0.92-0.98)	0.0008	0.94(0.92-0.96)	6.4e-08	7.7e-11	3.81e-07	---
chr5	132376910	132376910	rs4705987	5_132376910_A_G	5_132407058_C_T	5	new	rs6596100	0.95(0.88-1.02)	0.13	0.95(0.92-0.98)	0.0008	0.94(0.92-0.96)	6.4e-08	7.7e-11	7.18e-07	---
chr5	132378310	132378310	rs61195511	5_132378310_C_T	5_132407058_C_T	5	new	rs6596100	0.95(0.88-1.02)	0.13	0.95(0.92-0.98)	0.0008	0.94(0.92-0.96)	6.4e-08	7.7e-11	2.32e-08	---
chr5	132380284	132380284	rs6874885	5_132380284_G_A	5_132407058_C_T	5	new	rs6596100	0.95(0.88-1.02)	0.13	0.95(0.92-0.98)	0.0008	0.94(0.92-0.96)	6.4e-08	7.7e-11	1.15e-08	---
chr5	132380316	132380316	rs6896107	5_132380316_T_C	5_132407058_C_T	5	new	rs6596100	0.95(0.88-1.02)	0.13	0.95(0.92-0.98)	0.0008	0.94(0.92-0.96)	6.4e-08	7.7e-11	4.91e-07	---
chr5	132380500	132380500	rs6874809	5_132380500_A_G	5_132407058_C_T	5	new	rs6596100	0.95(0.88-1.02)	0.13	0.95(0.92-0.98)	0.0008	0.94(0.92-0.96)	6.4e-08	7.7e-11	1.15e-08	---
chr5	132380731	132380731	rs7715447	5_132380731_C_A	5_132407058_C_T	5	new	rs6596100	0.95(0.88-1.02)	0.13	0.95(0.92-0.98)	0.0008	0.94(0.92-0.96)	6.4e-08	7.7e-11	4.9e-07	---
chr5	132381340	132381340	rs10064506	5_132381340_C_A	5_132407058_C_T	5	new	rs6596100	0.95(0.88-1.02)	0.13	0.95(0.92-0.98)	0.0008	0.94(0.92-0.96)	6.4e-08	7.7e-11	5.54e-07	---
chr5	132381617	132381617	rs11747722	5_132381617_T_C	5_132407058_C_T	5	new	rs6596100	0.95(0.88-1.02)	0.13	0.95(0.92-0.98)	0.0008	0.94(0.92-0.96)	6.4e-08	7.7e-11	6.74e-07	---
chr5	132381780	132381780	rs67476324	5_132381780_T_C	5_132407058_C_T	5	new	rs6596100	0.95(0.88-1.02)	0.13	0.95(0.92-0.98)	0.0008	0.94(0.92-0.96)	6.4e-08	7.7e-11	4.87e-07	---
chr5	132382272	132382272	rs57079115	5_132382272_C_T	5_132407058_C_T	5	new	rs6596100	0.95(0.88-1.02)	0.13	0.95(0.92-0.98)	0.0008	0.94(0.92-0.96)	6.4e-08	7.7e-11	4.86e-07	---
chr5	132382729	132382729	rs200377832	5_132382729_T_TTTTC	5_132407058_C_T	5	new	rs6596100	0.95(0.88-1.02)	0.13	0.95(0.92-0.98)	0.0008	0.94(0.92-0.96)	6.4e-08	7.7e-11	2.51e-08	---
chr5	132383413	132383413	rs56362059	5_132383413_C_T	5_132407058_C_T	5	new	rs6596100	0.95(0.88-1.02)	0.13	0.95(0.92-0.98)	0.0008	0.94(0.92-0.96)	6.4e-08	7.7e-11	1.03e-08	---
chr5	132384059	132384059	rs10434745	5_132384059_A_G	5_132407058_C_T	5	new	rs6596100	0.95(0.88-1.02)	0.13	0.95(0.92-0.98)	0.0008	0.94(0.92-0.96)	6.4e-08	7.7e-11	1.12e-08	---
chr5	132384131	132384131	rs61246276	5_132384131_A_ACACT	5_132407058_C_T	5	new	rs6596100	0.95(0.88-1.02)	0.13	0.95(0.92-0.98)	0.0008	0.94(0.92-0.96)	6.4e-08	7.7e-11	6.28e-07	---
chr5	132384689	132384689	rs4574536	5_132384689_T_C	5_132407058_C_T	5	new	rs6596100	0.95(0.88-1.02)	0.13	0.95(0.92-0.98)	0.0008	0.94(0.92-0.96)	6.4e-08	7.7e-11	2.09e-08	---
chr5	132385766	132385766	rs57976864	5_132385766_CAAACTG_C	5_132407058_C_T	5	new	rs6596100	0.95(0.88-1.02)	0.13	0.95(0.92-0.98)	0.0008	0.94(0.92-0.96)	6.4e-08	7.7e-11	1.71e-08	---
chr5	132386223	132386223	rs7730125	5_132386223_G_A	5_132407058_C_T	5	new	rs6596100	0.95(0.88-1.02)	0.13	0.95(0.92-0.98)	0.0008	0.94(0.92-0.96)	6.4e-08	7.7e-11	1.11e-08	---
chr5	132386241	132386241	rs7712181	5_132386241_T_C	5_132407058_C_T	5	new	rs6596100	0.95(0.88-1.02)	0.13	0.95(0.92-0.98)	0.0008	0.94(0.92-0.96)	6.4e-08	7.7e-11	4.54e-07	---
chr5	132386242	132386242	rs7712182	5_132386242_T_A	5_132407058_C_T	5	new	rs6596100	0.95(0.88-1.02)	0.13	0.95(0.92-0.98)	0.0008	0.94(0.92-0.96)	6.4e-08	7.7e-11	4.54e-07	---
chr5	132386684	132386684	rs7730930	5_132386684_G_T	5_132407058_C_T	5	new	rs6596100	0.95(0.88-1.02)	0.13	0.95(0.92-0.98)	0.0008	0.94(0.92-0.96)	6.4e-08	7.7e-11	2.17e-08	---
chr5	132387260	132387260	rs3088225	5_132387260_A_G	5_132407058_C_T	5	new	rs6596100	0.95(0.88-1.02)	0.13	0.95(0.92-0.98)	0.0008	0.94(0.92-0.96)	6.4e-08	7.7e-11	5.98e-07	---
chr5	132388068	132388068	rs76836760	5_132388068_T_G	5_132407058_C_T	5	new	rs6596100	0.95(0.88-1.02)	0.13	0.95(0.92-0.98)	0.0008	0.94(0.92-0.96)	6.4e-08	7.7e-11	6.16e-07	---
chr5	132388959	132388959	rs72801445	5_132388959_C_T	5_132407058_C_T	5	new	rs6596100	0.95(0.88-1.02)	0.13	0.95(0.92-0.98)	0.0008	0.94(0.92-0.96)	6.4e-08	7.7e-11	1.13e-08	---
chr5	132388960	132388960	rs66827546	5_132388960_G_A	5_132407058_C_T	5	new	rs6596100	0.95(0.88-1.02)	0.13	0.95(0.92-0.98)	0.0008	0.94(0.92-0.96)	6.4e-08	7.7e-11	4.7e-07	---
chr5	132389279	132389279	rs6867581	5_132389279_C_T	5_132407058_C_T	5	new	rs6596100	0.95(0.88-1.02)	0.13	0.95(0.92-0.98)	0.0008	0.94(0.92-0.96)	6.4e-08	7.7e-11	1.17e-08	---
chr5	132389687	132389687	rs12173082	5_132389687_C_G	5_132407058_C_T	5	new	rs6596100	0.95(0.88-1.02)	0.13	0.95(0.92-0.98)	0.0008	0.94(0.92-0.96)	6.4e-08	7.7e-11	1.1e-08	---
chr5	132389746	132389746	rs74322503	5_132389746_C_CA	5_132407058_C_T	5	new	rs6596100	0.95(0.88-1.02)	0.13	0.95(0.92-0.98)	0.0008	0.94(0.92-0.96)	6.4e-08	7.7e-11	1.05e-08	---
chr5	132390583	132390583	rs62375202	5_132390583_T_C	5_132407058_C_T	5	new	rs6596100	0.95(0.88-1.02)	0.13	0.95(0.92-0.98)	0.0008	0.94(0.92-0.96)	6.4e-08	7.7e-11	1.17e-08	---
chr5	132390752	132390752	rs6874265	5_132390752_G_T	5_132407058_C_T	5	new	rs6596100	0.95(0.88-1.02)	0.13	0.95(0.92-0.98)	0.0008	0.94(0.92-0.96)	6.4e-08	7.7e-11	6.03e-07	---
chr5	132391422	132391422	rs62375203	5_132391422_A_G	5_132407058_C_T	5	new	rs6596100	0.95(0.88-1.02)	0.13	0.95(0.92-0.98)	0.0008	0.94(0.92-0.96)	6.4e-08	7.7e-11	1.22e-08	---
chr5	132391462	132391462	rs62375204	5_132391462_C_T	5_132407058_C_T	5	new	rs6596100	0.95(0.88-1.02)	0.13	0.95(0.92-0.98)	0.0008	0.94(0.92-0.96)	6.4e-08	7.7e-11	2.9e-07	---
chr5	132391701	132391701	rs10043154	5_132391701_T_C	5_132407058_C_T	5	new	rs6596100	0.95(0.88-1.02)	0.13	0.95(0.92-0.98)	0.0008	0.94(0.92-0.96)	6.4e-08	7.7e-11	5.21e-07	---
chr5	132392393	132392393	rs6596097	5_132392393_A_G	5_132407058_C_T	5	new	rs6596100	0.95(0.88-1.02)	0.13	0.95(0.92-0.98)	0.0008	0.94(0.92-0.96)	6.4e-08	7.7e-11	5.51e-07	---
chr5	132393340	132393340	rs3935119	5_132393340_A_G	5_132407058_C_T	5	new	rs6596100	0.95(0.88-1.02)	0.13	0.95(0.92-0.98)	0.0008	0.94(0.92-0.96)	6.4e-08	7.7e-11	1.05e-08	---
chr5	132393389	132393389	rs62375205	5_132393389_A_G	5_132407058_C_T	5	new	rs6596100	0.95(0.88-1.02)	0.13	0.95(0.92-0.98)	0.0008	0.94(0.92-0.96)	6.4e-08	7.7e-11	1.07e-08	---
chr5	132395537	132395537	rs55914434	5_132395537_T_G	5_132407058_C_T	5	new	rs6596100	0.95(0.88-1.02)	0.13	0.95(0.92-0.98)	0.0008	0.94(0.92-0.96)	6.4e-08	7.7e-11	3.19e-07	---
chr5	132396132	132396132	rs62375207	5_132396132_A_G	5_132407058_C_T	5	new	rs6596100	0.95(0.88-1.02)	0.13	0.95(0.92-0.98)	0.0008	0.94(0.92-0.96)	6.4e-08	7.7e-11	5.92e-07	---
chr5	132396970	132396970	rs4705989	5_132396970_A_G	5_132407058_C_T	5	new	rs6596100	0.95(0.88-1.02)	0.13	0.95(0.92-0.98)	0.0008	0.94(0.92-0.96)	6.4e-08	7.7e-11	3.11e-07	---
chr5	132397121	132397121	rs55834426	5_132397121_C_CTATT	5_132407058_C_T	5	new	rs6596100	0.95(0.88-1.02)	0.13	0.95(0.92-0.98)	0.0008	0.94(0.92-0.96)	6.4e-08	7.7e-11	2.42e-07	---
chr5	132398981	132398981	rs112403169	5_132398981_A_AT	5_132407058_C_T	5	new	rs6596100	0.95(0.88-1.02)	0.13	0.95(0.92-0.98)	0.0008	0.94(0.92-0.96)	6.4e-08	7.7e-11	4.54e-08	---
chr5	132399267	132399267	rs62375208	5_132399267_C_T	5_132407058_C_T	5	new	rs6596100	0.95(0.88-1.02)	0.13	0.95(0.92-0.98)	0.0008	0.94(0.92-0.96)	6.4e-08	7.7e-11	9.91e-09	---
chr5	132399759	132399759	rs72801450	5_132399759_A_G	5_132407058_C_T	5	new	rs6596100	0.95(0.88-1.02)	0.13	0.95(0.92-0.98)	0.0008	0.94(0.92-0.96)	6.4e-08	7.7e-11	1.05e-08	---
chr5	132399944	132399944	rs58821592	5_132399944_C_T	5_132407058_C_T	5	new	rs6596100	0.95(0.88-1.02)	0.13	0.95(0.92-0.98)	0.0008	0.94(0.92-0.96)	6.4e-08	7.7e-11	3.19e-07	---
chr5	132401730	132401730	rs6866500	5_132401730_G_A	5_132407058_C_T	5	new	rs6596100	0.95(0.88-1.02)	0.13	0.95(0.92-0.98)	0.0008	0.94(0.92-0.96)	6.4e-08	7.7e-11	6.14e-07	---
chr5	132402367	132402367	rs60693159	5_132402367_AT_A	5_132407058_C_T	5	new	rs6596100	0.95(0.88-1.02)	0.13	0.95(0.92-0.98)	0.0008	0.94(0.92-0.96)	6.4e-08	7.7e-11	4.1e-07	---
chr5	132402738	132402738	rs62375211	5_132402738_T_C	5_132407058_C_T	5	new	rs6596100	0.95(0.88-1.02)	0.13	0.95(0.92-0.98)	0.0008	0.94(0.92-0.96)	6.4e-08	7.7e-11	9.8e-09	---
chr5	132403057	132403057	rs11448270	5_132403057_T_TA	5_132407058_C_T	5	new	rs6596100	0.95(0.88-1.02)	0.13	0.95(0.92-0.98)	0.0008	0.94(0.92-0.96)	6.4e-08	7.7e-11	2.9e-08	---
chr5	132403341	132403341	rs6596098	5_132403341_C_T	5_132407058_C_T	5	new	rs6596100	0.95(0.88-1.02)	0.13	0.95(0.92-0.98)	0.0008	0.94(0.92-0.96)	6.4e-08	7.7e-11	6.12e-07	---
chr5	132403359	132403359	rs6596099	5_132403359_T_A	5_132407058_C_T	5	new	rs6596100	0.95(0.88-1.02)	0.13	0.95(0.92-0.98)	0.0008	0.94(0.92-0.96)	6.4e-08	7.7e-11	5.67e-07	---
chr5	132403433	132403433	rs4705990	5_132403433_A_G	5_132407058_C_T	5	new	rs6596100	0.95(0.88-1.02)	0.13	0.95(0.92-0.98)	0.0008	0.94(0.92-0.96)	6.4e-08	7.7e-11	5.51e-07	---
chr5	132403887	132403887	rs57060554	5_132403887_A_G	5_132407058_C_T	5	new	rs6596100	0.95(0.88-1.02)	0.13	0.95(0.92-0.98)	0.0008	0.94(0.92-0.96)	6.4e-08	7.7e-11	2.45e-07	---
chr5	132404163	132404163	rs4321746	5_132404163_A_T	5_132407058_C_T	5	new	rs6596100	0.95(0.88-1.02)	0.13	0.95(0.92-0.98)	0.0008	0.94(0.92-0.96)	6.4e-08	7.7e-11	5.71e-07	---
chr5	132404735	132404735	rs56104944	5_132404735_C_T	5_132407058_C_T	5	new	rs6596100	0.95(0.88-1.02)	0.13	0.95(0.92-0.98)	0.0008	0.94(0.92-0.96)	6.4e-08	7.7e-11	1.08e-08	---
chr5	132404922	132404922	rs113972061	5_132404922_G_GTTCA	5_132407058_C_T	5	new	rs6596100	0.95(0.88-1.02)	0.13	0.95(0.92-0.98)	0.0008	0.94(0.92-0.96)	6.4e-08	7.7e-11	6.22e-07	---
chr5	132404947	132404947	rs56306291	5_132404947_T_A	5_132407058_C_T	5	new	rs6596100	0.95(0.88-1.02)	0.13	0.95(0.92-0.98)	0.0008	0.94(0.92-0.96)	6.4e-08	7.7e-11	1.5e-07	---
chr5	132405637	132405637	rs62375215	5_132405637_C_G	5_132407058_C_T	5	new	rs6596100	0.95(0.88-1.02)	0.13	0.95(0.92-0.98)	0.0008	0.94(0.92-0.96)	6.4e-08	7.7e-11	4.2e-07	---
chr5	132405885	132405885	rs72801454	5_132405885_A_T	5_132407058_C_T	5	new	rs6596100	0.95(0.88-1.02)	0.13	0.95(0.92-0.98)	0.0008	0.94(0.92-0.96)	6.4e-08	7.7e-11	3.07e-08	---
chr5	132407058	132407058	rs6596100	5_132407058_C_T	5_132407058_C_T	5	new	rs6596100	0.95(0.88-1.02)	0.13	0.95(0.92-0.98)	0.0008	0.94(0.92-0.96)	6.4e-08	7.7e-11	7.74e-09	---
chr5	132408631	132408631	rs6897211	5_132408631_T_C	5_132407058_C_T	5	new	rs6596100	0.95(0.88-1.02)	0.13	0.95(0.92-0.98)	0.0008	0.94(0.92-0.96)	6.4e-08	7.7e-11	5.1e-07	---
chr5	132409074	132409074	rs56121115	5_132409074_A_G	5_132407058_C_T	5	new	rs6596100	0.95(0.88-1.02)	0.13	0.95(0.92-0.98)	0.0008	0.94(0.92-0.96)	6.4e-08	7.7e-11	2.79e-07	---
chr5	132409650	132409650	rs62375234	5_132409650_C_T	5_132407058_C_T	5	new	rs6596100	0.95(0.88-1.02)	0.13	0.95(0.92-0.98)	0.0008	0.94(0.92-0.96)	6.4e-08	7.7e-11	4.59e-07	---
chr5	132409867	132409867	rs62375235	5_132409867_T_G	5_132407058_C_T	5	new	rs6596100	0.95(0.88-1.02)	0.13	0.95(0.92-0.98)	0.0008	0.94(0.92-0.96)	6.4e-08	7.7e-11	1.01e-08	---
chr5	132409999	132409999	rs72801456	5_132409999_T_G	5_132407058_C_T	5	new	rs6596100	0.95(0.88-1.02)	0.13	0.95(0.92-0.98)	0.0008	0.94(0.92-0.96)	6.4e-08	7.7e-11	1.01e-08	---
chr5	132411431	132411431	rs6892902	5_132411431_G_A	5_132407058_C_T	5	new	rs6596100	0.95(0.88-1.02)	0.13	0.95(0.92-0.98)	0.0008	0.94(0.92-0.96)	6.4e-08	7.7e-11	5.61e-07	---
chr5	132412299	132412299	rs11747001	5_132412299_A_G	5_132407058_C_T	5	new	rs6596100	0.95(0.88-1.02)	0.13	0.95(0.92-0.98)	0.0008	0.94(0.92-0.96)	6.4e-08	7.7e-11	1.01e-08	---
chr5	132412848	132412848	rs56265094	5_132412848_C_T	5_132407058_C_T	5	new	rs6596100	0.95(0.88-1.02)	0.13	0.95(0.92-0.98)	0.0008	0.94(0.92-0.96)	6.4e-08	7.7e-11	1.06e-08	---
chr5	132413338	132413338	rs60893392	5_132413338_CT_C	5_132407058_C_T	5	new	rs6596100	0.95(0.88-1.02)	0.13	0.95(0.92-0.98)	0.0008	0.94(0.92-0.96)	6.4e-08	7.7e-11	6.49e-07	---
chr5	132415569	132415569	rs6596102	5_132415569_A_G	5_132407058_C_T	5	new	rs6596100	0.95(0.88-1.02)	0.13	0.95(0.92-0.98)	0.0008	0.94(0.92-0.96)	6.4e-08	7.7e-11	4.61e-07	---
chr5	132418080	132418080	rs4128344	5_132418080_C_G	5_132407058_C_T	5	new	rs6596100	0.95(0.88-1.02)	0.13	0.95(0.92-0.98)	0.0008	0.94(0.92-0.96)	6.4e-08	7.7e-11	9.58e-09	---
chr5	132418572	132418572	rs56143603	5_132418572_A_G	5_132407058_C_T	5	new	rs6596100	0.95(0.88-1.02)	0.13	0.95(0.92-0.98)	0.0008	0.94(0.92-0.96)	6.4e-08	7.7e-11	9.6e-09	---
chr5	132418974	132418974	rs76495289	5_132418974_A_T	5_132407058_C_T	5	new	rs6596100	0.95(0.88-1.02)	0.13	0.95(0.92-0.98)	0.0008	0.94(0.92-0.96)	6.4e-08	7.7e-11	2.36e-07	---
chr5	132426098	132426098	rs62375240	5_132426098_A_C	5_132407058_C_T	5	new	rs6596100	0.95(0.88-1.02)	0.13	0.95(0.92-0.98)	0.0008	0.94(0.92-0.96)	6.4e-08	7.7e-11	9.84e-09	---
chr5	132430154	132430154	rs73272725	5_132430154_G_A	5_132407058_C_T	5	new	rs6596100	0.95(0.88-1.02)	0.13	0.95(0.92-0.98)	0.0008	0.94(0.92-0.96)	6.4e-08	7.7e-11	5.57e-07	---
chr5	132430525	132430525	rs55650161	5_132430525_T_C	5_132407058_C_T	5	new	rs6596100	0.95(0.88-1.02)	0.13	0.95(0.92-0.98)	0.0008	0.94(0.92-0.96)	6.4e-08	7.7e-11	1.29e-08	---
chr5	132430692	132430692	rs55800184	5_132430692_G_A	5_132407058_C_T	5	new	rs6596100	0.95(0.88-1.02)	0.13	0.95(0.92-0.98)	0.0008	0.94(0.92-0.96)	6.4e-08	7.7e-11	5.71e-07	---
chr5	132432530	132432530	rs7711865	5_132432530_C_T	5_132407058_C_T	5	new	rs6596100	0.95(0.88-1.02)	0.13	0.95(0.92-0.98)	0.0008	0.94(0.92-0.96)	6.4e-08	7.7e-11	1.16e-08	---
chr5	132433297	132433297	rs62375243	5_132433297_G_A	5_132407058_C_T	5	new	rs6596100	0.95(0.88-1.02)	0.13	0.95(0.92-0.98)	0.0008	0.94(0.92-0.96)	6.4e-08	7.7e-11	5.31e-07	---
chr5	132433618	132433618	rs4705880	5_132433618_T_A	5_132407058_C_T	5	new	rs6596100	0.95(0.88-1.02)	0.13	0.95(0.92-0.98)	0.0008	0.94(0.92-0.96)	6.4e-08	7.7e-11	4.22e-07	---
chr5	132434649	132434649	rs10463900	5_132434649_G_C	5_132407058_C_T	5	new	rs6596100	0.95(0.88-1.02)	0.13	0.95(0.92-0.98)	0.0008	0.94(0.92-0.96)	6.4e-08	7.7e-11	5.28e-07	---
chr5	132435488	132435488	rs4301229	5_132435488_C_T	5_132407058_C_T	5	new	rs6596100	0.95(0.88-1.02)	0.13	0.95(0.92-0.98)	0.0008	0.94(0.92-0.96)	6.4e-08	7.7e-11	1.31e-08	---
chr5	132436219	132436219	rs62375244	5_132436219_C_T	5_132407058_C_T	5	new	rs6596100	0.95(0.88-1.02)	0.13	0.95(0.92-0.98)	0.0008	0.94(0.92-0.96)	6.4e-08	7.7e-11	2.97e-07	---
chr5	132436392	132436392	rs28548389	5_132436392_C_A	5_132407058_C_T	5	new	rs6596100	0.95(0.88-1.02)	0.13	0.95(0.92-0.98)	0.0008	0.94(0.92-0.96)	6.4e-08	7.7e-11	7.2e-07	---
chr5	132437531	132437531	rs1131809	5_132437531_C_T	5_132407058_C_T	5	new	rs6596100	0.95(0.88-1.02)	0.13	0.95(0.92-0.98)	0.0008	0.94(0.92-0.96)	6.4e-08	7.7e-11	8.47e-09	---
chr5	132438358	132438358	rs62375245	5_132438358_C_T	5_132407058_C_T	5	new	rs6596100	0.95(0.88-1.02)	0.13	0.95(0.92-0.98)	0.0008	0.94(0.92-0.96)	6.4e-08	7.7e-11	1.74e-07	---
chr5	132439010	132439010	rs62375246	5_132439010_T_A	5_132407058_C_T	5	new	rs6596100	0.95(0.88-1.02)	0.13	0.95(0.92-0.98)	0.0008	0.94(0.92-0.96)	6.4e-08	7.7e-11	2.97e-07	---
chr5	132439028	132439028	rs62375247	5_132439028_C_T	5_132407058_C_T	5	new	rs6596100	0.95(0.88-1.02)	0.13	0.95(0.92-0.98)	0.0008	0.94(0.92-0.96)	6.4e-08	7.7e-11	2.17e-07	---
chr5	132440285	132440285	rs14355	5_132440285_C_G	5_132407058_C_T	5	new	rs6596100	0.95(0.88-1.02)	0.13	0.95(0.92-0.98)	0.0008	0.94(0.92-0.96)	6.4e-08	7.7e-11	4e-07	---
chr5	132441302	132441302	rs13718	5_132441302_A_G	5_132407058_C_T	5	new	rs6596100	0.95(0.88-1.02)	0.13	0.95(0.92-0.98)	0.0008	0.94(0.92-0.96)	6.4e-08	7.7e-11	9.38e-09	---
chr5	132441799	132441799	5:132441799	5_132441799_T_G	5_132407058_C_T	5	new	rs6596100	0.95(0.88-1.02)	0.13	0.95(0.92-0.98)	0.0008	0.94(0.92-0.96)	6.4e-08	7.7e-11	8.56e-09	---
chr5	132442190	132442190	rs56076449	5_132442190_T_G	5_132407058_C_T	5	new	rs6596100	0.95(0.88-1.02)	0.13	0.95(0.92-0.98)	0.0008	0.94(0.92-0.96)	6.4e-08	7.7e-11	2.2e-07	---
chr5	132442263	132442263	rs56083805	5_132442263_T_C	5_132407058_C_T	5	new	rs6596100	0.95(0.88-1.02)	0.13	0.95(0.92-0.98)	0.0008	0.94(0.92-0.96)	6.4e-08	7.7e-11	7.97e-09	---
chr5	132442866	132442866	rs60306856	5_132442866_T_A	5_132407058_C_T	5	new	rs6596100	0.95(0.88-1.02)	0.13	0.95(0.92-0.98)	0.0008	0.94(0.92-0.96)	6.4e-08	7.7e-11	1.21e-08	---
chr5	132443255	132443255	rs67394705	5_132443255_G_C	5_132407058_C_T	5	new	rs6596100	0.95(0.88-1.02)	0.13	0.95(0.92-0.98)	0.0008	0.94(0.92-0.96)	6.4e-08	7.7e-11	4.72e-07	---
chr5	132443411	132443411	rs72801470	5_132443411_G_C	5_132407058_C_T	5	new	rs6596100	0.95(0.88-1.02)	0.13	0.95(0.92-0.98)	0.0008	0.94(0.92-0.96)	6.4e-08	7.7e-11	2.88e-07	---
chr5	132443479	132443479	rs62375249	5_132443479_C_T	5_132407058_C_T	5	new	rs6596100	0.95(0.88-1.02)	0.13	0.95(0.92-0.98)	0.0008	0.94(0.92-0.96)	6.4e-08	7.7e-11	1.11e-08	---
chr5	132443605	132443605	rs77509681	5_132443605_CAG_C	5_132407058_C_T	5	new	rs6596100	0.95(0.88-1.02)	0.13	0.95(0.92-0.98)	0.0008	0.94(0.92-0.96)	6.4e-08	7.7e-11	1.81e-07	---
chr5	132443710	132443710	rs62375250	5_132443710_T_C	5_132407058_C_T	5	new	rs6596100	0.95(0.88-1.02)	0.13	0.95(0.92-0.98)	0.0008	0.94(0.92-0.96)	6.4e-08	7.7e-11	6.01e-07	---
chr5	132443727	132443727	rs62375251	5_132443727_C_T	5_132407058_C_T	5	new	rs6596100	0.95(0.88-1.02)	0.13	0.95(0.92-0.98)	0.0008	0.94(0.92-0.96)	6.4e-08	7.7e-11	4.51e-08	---
chr5	132443929	132443929	rs72801473	5_132443929_T_C	5_132407058_C_T	5	new	rs6596100	0.95(0.88-1.02)	0.13	0.95(0.92-0.98)	0.0008	0.94(0.92-0.96)	6.4e-08	7.7e-11	4.46e-08	---
chr5	132444301	132444301	rs11745702	5_132444301_T_C	5_132407058_C_T	5	new	rs6596100	0.95(0.88-1.02)	0.13	0.95(0.92-0.98)	0.0008	0.94(0.92-0.96)	6.4e-08	7.7e-11	3.55e-07	---
chr5	132444509	132444509	rs11742248	5_132444509_C_T	5_132407058_C_T	5	new	rs6596100	0.95(0.88-1.02)	0.13	0.95(0.92-0.98)	0.0008	0.94(0.92-0.96)	6.4e-08	7.7e-11	1.8e-08	---
chr5	132445711	132445711	rs12108720	5_132445711_C_G	5_132407058_C_T	5	new	rs6596100	0.95(0.88-1.02)	0.13	0.95(0.92-0.98)	0.0008	0.94(0.92-0.96)	6.4e-08	7.7e-11	5.68e-07	---
chr5	158204425	158204425	rs1368298	5_158204425_A_G	5_158244083_C_T	5	old	rs1432679	1.08(1.01-1.14)	0.016	1.07(1.04-1.09)	8.2e-09	1.07(1.05-1.10)	2.1e-12	5.8e-21	4.95e-30	+++
chr5	158220193	158220193	rs31864	5_158220193_A_G	5_158244083_C_T	5	old	rs1432679	1.08(1.01-1.14)	0.016	1.07(1.04-1.09)	8.2e-09	1.07(1.05-1.10)	2.1e-12	5.8e-21	1.91e-30	+++
chr5	158227898	158227898	rs12332693	5_158227898_G_A	5_158244083_C_T	5	old	rs1432679	1.08(1.01-1.14)	0.016	1.07(1.04-1.09)	8.2e-09	1.07(1.05-1.10)	2.1e-12	5.8e-21	2.14e-30	---
chr5	158230013	158230013	rs11135046	5_158230013_G_T	5_158244083_C_T	5	old	rs1432679	1.08(1.01-1.14)	0.016	1.07(1.04-1.09)	8.2e-09	1.07(1.05-1.10)	2.1e-12	5.8e-21	4.68e-31	---
chr5	158244083	158244083	rs1432679	5_158244083_C_T	5_158244083_C_T	5	old	rs1432679	1.08(1.01-1.14)	0.016	1.07(1.04-1.09)	8.2e-09	1.07(1.05-1.10)	2.1e-12	5.8e-21	6.63e-31	---
chr5	158261163	158261163	rs17715065	5_158261163_C_T	5_158244083_C_T	5	old	rs1432679	1.08(1.01-1.14)	0.016	1.07(1.04-1.09)	8.2e-09	1.07(1.05-1.10)	2.1e-12	5.8e-21	2.11e-29	---
chr5	169541551	169541551	rs2338815	5_169541551_C_T	5_169591487_G_T	5	new	rs4562056	1.02(0.96-1.09)	0.55	1.03(1.01-1.06)	0.0073	1.06(1.03-1.08)	2.3e-07	1.4e-08	4.36e-08	+++
chr5	169545642	169545642	rs6880991	5_169545642_T_C	5_169591487_G_T	5	new	rs4562056	1.02(0.96-1.09)	0.55	1.03(1.01-1.06)	0.0073	1.06(1.03-1.08)	2.3e-07	1.4e-08	3.43e-08	+++
chr5	169546629	169546629	rs56722914	5_169546629_T_C	5_169591487_G_T	5	new	rs4562056	1.02(0.96-1.09)	0.55	1.03(1.01-1.06)	0.0073	1.06(1.03-1.08)	2.3e-07	1.4e-08	3.55e-08	+++
chr5	169554186	169554186	rs56409427	5_169554186_T_C	5_169591487_G_T	5	new	rs4562056	1.02(0.96-1.09)	0.55	1.03(1.01-1.06)	0.0073	1.06(1.03-1.08)	2.3e-07	1.4e-08	3.18e-08	+++
chr5	169555028	169555028	rs55788424	5_169555028_A_T	5_169591487_G_T	5	new	rs4562056	1.02(0.96-1.09)	0.55	1.03(1.01-1.06)	0.0073	1.06(1.03-1.08)	2.3e-07	1.4e-08	3.26e-08	+++
chr5	169560177	169560177	rs56147830	5_169560177_G_A	5_169591487_G_T	5	new	rs4562056	1.02(0.96-1.09)	0.55	1.03(1.01-1.06)	0.0073	1.06(1.03-1.08)	2.3e-07	1.4e-08	3.15e-08	+++
chr5	169560717	169560717	rs11748677	5_169560717_G_C	5_169591487_G_T	5	new	rs4562056	1.02(0.96-1.09)	0.55	1.03(1.01-1.06)	0.0073	1.06(1.03-1.08)	2.3e-07	1.4e-08	3.15e-08	+++
chr5	169561529	169561529	rs67221258	5_169561529_TTC_T	5_169591487_G_T	5	new	rs4562056	1.02(0.96-1.09)	0.55	1.03(1.01-1.06)	0.0073	1.06(1.03-1.08)	2.3e-07	1.4e-08	1.25e-08	+++
chr5	169566973	169566973	rs59346687	5_169566973_TC_T	5_169591487_G_T	5	new	rs4562056	1.02(0.96-1.09)	0.55	1.03(1.01-1.06)	0.0073	1.06(1.03-1.08)	2.3e-07	1.4e-08	4.03e-09	+++
chr5	169567992	169567992	rs17072121	5_169567992_C_G	5_169591487_G_T	5	new	rs4562056	1.02(0.96-1.09)	0.55	1.03(1.01-1.06)	0.0073	1.06(1.03-1.08)	2.3e-07	1.4e-08	1.28e-08	+++
chr5	169568846	169568846	rs7729559	5_169568846_C_T	5_169591487_G_T	5	new	rs4562056	1.02(0.96-1.09)	0.55	1.03(1.01-1.06)	0.0073	1.06(1.03-1.08)	2.3e-07	1.4e-08	1.15e-08	+++
chr5	169569576	169569576	rs56234354	5_169569576_G_A	5_169591487_G_T	5	new	rs4562056	1.02(0.96-1.09)	0.55	1.03(1.01-1.06)	0.0073	1.06(1.03-1.08)	2.3e-07	1.4e-08	2.22e-09	+++
chr5	169569829	169569829	rs11743915	5_169569829_G_T	5_169591487_G_T	5	new	rs4562056	1.02(0.96-1.09)	0.55	1.03(1.01-1.06)	0.0073	1.06(1.03-1.08)	2.3e-07	1.4e-08	2.22e-09	+++
chr5	169571464	169571464	rs58242049	5_169571464_G_A	5_169591487_G_T	5	new	rs4562056	1.02(0.96-1.09)	0.55	1.03(1.01-1.06)	0.0073	1.06(1.03-1.08)	2.3e-07	1.4e-08	2.59e-09	+++
chr5	169575954	169575954	rs55909165	5_169575954_C_G	5_169591487_G_T	5	new	rs4562056	1.02(0.96-1.09)	0.55	1.03(1.01-1.06)	0.0073	1.06(1.03-1.08)	2.3e-07	1.4e-08	4.05e-08	+++
chr5	169591115	169591115	rs4242154	5_169591115_T_C	5_169591487_G_T	5	new	rs4562056	1.02(0.96-1.09)	0.55	1.03(1.01-1.06)	0.0073	1.06(1.03-1.08)	2.3e-07	1.4e-08	3.94e-08	+++
chr5	169591460	169591460	rs10074269	5_169591460_T_C	5_169591487_G_T	5	new	rs4562056	1.02(0.96-1.09)	0.55	1.03(1.01-1.06)	0.0073	1.06(1.03-1.08)	2.3e-07	1.4e-08	5.04e-10	+++
chr5	169591487	169591487	rs4562056	5_169591487_G_T	5_169591487_G_T	5	new	rs4562056	1.02(0.96-1.09)	0.55	1.03(1.01-1.06)	0.0073	1.06(1.03-1.08)	2.3e-07	1.4e-08	4.72e-10	+++
chr6	13713099	13713099	rs405447	6_13713099_A_G	6_13722523_G_A	6	old	rs204247	1.04(0.98-1.10)	0.22	1.07(1.04-1.09)	3.6e-08	1.04(1.02-1.06)	3e-05	6.3e-12	1.73e-13	---
chr6	13713366	13713366	rs418053	6_13713366_G_C	6_13722523_G_A	6	old	rs204247	1.04(0.98-1.10)	0.22	1.07(1.04-1.09)	3.6e-08	1.04(1.02-1.06)	3e-05	6.3e-12	1.2e-13	---
chr6	13714482	13714482	rs396869	6_13714482_T_C	6_13722523_G_A	6	old	rs204247	1.04(0.98-1.10)	0.22	1.07(1.04-1.09)	3.6e-08	1.04(1.02-1.06)	3e-05	6.3e-12	6.49e-13	---
chr6	13715303	13715303	rs24023	6_13715303_A_G	6_13722523_G_A	6	old	rs204247	1.04(0.98-1.10)	0.22	1.07(1.04-1.09)	3.6e-08	1.04(1.02-1.06)	3e-05	6.3e-12	6.79e-13	---
chr6	13715997	13715997	rs424001	6_13715997_C_T	6_13722523_G_A	6	old	rs204247	1.04(0.98-1.10)	0.22	1.07(1.04-1.09)	3.6e-08	1.04(1.02-1.06)	3e-05	6.3e-12	7.81e-13	---
chr6	13716592	13716592	rs441125	6_13716592_A_G	6_13722523_G_A	6	old	rs204247	1.04(0.98-1.10)	0.22	1.07(1.04-1.09)	3.6e-08	1.04(1.02-1.06)	3e-05	6.3e-12	1.05e-12	---
chr6	13716626	13716626	rs441116	6_13716626_A_G	6_13722523_G_A	6	old	rs204247	1.04(0.98-1.10)	0.22	1.07(1.04-1.09)	3.6e-08	1.04(1.02-1.06)	3e-05	6.3e-12	8.43e-13	---
chr6	13716711	13716711	rs381560	6_13716711_G_A	6_13722523_G_A	6	old	rs204247	1.04(0.98-1.10)	0.22	1.07(1.04-1.09)	3.6e-08	1.04(1.02-1.06)	3e-05	6.3e-12	3.84e-13	---
chr6	13716723	13716723	rs381551	6_13716723_G_A	6_13722523_G_A	6	old	rs204247	1.04(0.98-1.10)	0.22	1.07(1.04-1.09)	3.6e-08	1.04(1.02-1.06)	3e-05	6.3e-12	6.45e-13	---
chr6	13717152	13717152	rs379903	6_13717152_G_A	6_13722523_G_A	6	old	rs204247	1.04(0.98-1.10)	0.22	1.07(1.04-1.09)	3.6e-08	1.04(1.02-1.06)	3e-05	6.3e-12	4.05e-13	---
chr6	13717338	13717338	rs394312	6_13717338_C_T	6_13722523_G_A	6	old	rs204247	1.04(0.98-1.10)	0.22	1.07(1.04-1.09)	3.6e-08	1.04(1.02-1.06)	3e-05	6.3e-12	8.66e-13	---
chr6	13717387	13717387	rs379161	6_13717387_G_A	6_13722523_G_A	6	old	rs204247	1.04(0.98-1.10)	0.22	1.07(1.04-1.09)	3.6e-08	1.04(1.02-1.06)	3e-05	6.3e-12	1e-12	---
chr6	13717395	13717395	rs427140	6_13717395_T_C	6_13722523_G_A	6	old	rs204247	1.04(0.98-1.10)	0.22	1.07(1.04-1.09)	3.6e-08	1.04(1.02-1.06)	3e-05	6.3e-12	1.64e-12	---
chr6	13717455	13717455	rs420874	6_13717455_T_A	6_13722523_G_A	6	old	rs204247	1.04(0.98-1.10)	0.22	1.07(1.04-1.09)	3.6e-08	1.04(1.02-1.06)	3e-05	6.3e-12	7.09e-13	---
chr6	13717913	13717913	rs495633	6_13717913_G_A	6_13722523_G_A	6	old	rs204247	1.04(0.98-1.10)	0.22	1.07(1.04-1.09)	3.6e-08	1.04(1.02-1.06)	3e-05	6.3e-12	7.02e-13	---
chr6	13717932	13717932	rs495572	6_13717932_A_C	6_13722523_G_A	6	old	rs204247	1.04(0.98-1.10)	0.22	1.07(1.04-1.09)	3.6e-08	1.04(1.02-1.06)	3e-05	6.3e-12	4.04e-13	---
chr6	13718126	13718126	rs368512	6_13718126_G_A	6_13722523_G_A	6	old	rs204247	1.04(0.98-1.10)	0.22	1.07(1.04-1.09)	3.6e-08	1.04(1.02-1.06)	3e-05	6.3e-12	8.47e-13	---
chr6	13718399	13718399	rs418720	6_13718399_T_C	6_13722523_G_A	6	old	rs204247	1.04(0.98-1.10)	0.22	1.07(1.04-1.09)	3.6e-08	1.04(1.02-1.06)	3e-05	6.3e-12	7.66e-13	---
chr6	13718502	13718502	rs55693177	6_13718502_G_GT	6_13722523_G_A	6	old	rs204247	1.04(0.98-1.10)	0.22	1.07(1.04-1.09)	3.6e-08	1.04(1.02-1.06)	3e-05	6.3e-12	6.27e-13	---
chr6	13718627	13718627	rs4236123	6_13718627_T_C	6_13722523_G_A	6	old	rs204247	1.04(0.98-1.10)	0.22	1.07(1.04-1.09)	3.6e-08	1.04(1.02-1.06)	3e-05	6.3e-12	8.66e-13	---
chr6	13718634	13718634	rs4236125	6_13718634_G_A	6_13722523_G_A	6	old	rs204247	1.04(0.98-1.10)	0.22	1.07(1.04-1.09)	3.6e-08	1.04(1.02-1.06)	3e-05	6.3e-12	8.15e-13	---
chr6	13718872	13718872	rs571676	6_13718872_T_C	6_13722523_G_A	6	old	rs204247	1.04(0.98-1.10)	0.22	1.07(1.04-1.09)	3.6e-08	1.04(1.02-1.06)	3e-05	6.3e-12	9.89e-13	---
chr6	13719129	13719129	rs371729	6_13719129_C_T	6_13722523_G_A	6	old	rs204247	1.04(0.98-1.10)	0.22	1.07(1.04-1.09)	3.6e-08	1.04(1.02-1.06)	3e-05	6.3e-12	9.09e-13	---
chr6	13722523	13722523	rs204247	6_13722523_G_A	6_13722523_G_A	6	old	rs204247	1.04(0.98-1.10)	0.22	1.07(1.04-1.09)	3.6e-08	1.04(1.02-1.06)	3e-05	6.3e-12	7.9e-13	---
chr6	13723374	13723374	rs204246	6_13723374_A_T	6_13722523_G_A	6	old	rs204247	1.04(0.98-1.10)	0.22	1.07(1.04-1.09)	3.6e-08	1.04(1.02-1.06)	3e-05	6.3e-12	7.33e-13	---
chr6	13724799	13724799	rs368310085	6_13724799_CTT_C	6_13722523_G_A	6	old	rs204247	1.04(0.98-1.10)	0.22	1.07(1.04-1.09)	3.6e-08	1.04(1.02-1.06)	3e-05	6.3e-12	6.54e-13	---
chr6	13729038	13729038	rs204243	6_13729038_T_C	6_13722523_G_A	6	old	rs204247	1.04(0.98-1.10)	0.22	1.07(1.04-1.09)	3.6e-08	1.04(1.02-1.06)	3e-05	6.3e-12	1.49e-12	---
chr6	13731570	13731570	rs204241	6_13731570_T_A	6_13722523_G_A	6	old	rs204247	1.04(0.98-1.10)	0.22	1.07(1.04-1.09)	3.6e-08	1.04(1.02-1.06)	3e-05	6.3e-12	7.37e-13	---
chr6	13741516	13741516	rs376024	6_13741516_T_C	6_13722523_G_A	6	old	rs204247	1.04(0.98-1.10)	0.22	1.07(1.04-1.09)	3.6e-08	1.04(1.02-1.06)	3e-05	6.3e-12	7.89e-12	---
chr6	16399557	16399557	rs3819405	6_16399557_C_T	6_16399557_C_T	6	new	rs3819405	0.92(0.86-0.98)	0.013	0.98(0.95-1)	0.075	0.95(0.93-0.97)	1e-06	6.5e-08	1.65e-08	---
chr6	20534461	20534461	rs11370426	6_20534461_G_GA	6_20621238_T_C	6	new	rs2223621	1.04(0.98-1.1)	0.23	1.06(1.03-1.08)	4.5e-06	1.03(1.01-1.06)	0.0017	3.5e-08	7.77e-09	---
chr6	20536748	20536748	rs2179550	6_20536748_C_G	6_20621238_T_C	6	new	rs2223621	1.04(0.98-1.1)	0.23	1.06(1.03-1.08)	4.5e-06	1.03(1.01-1.06)	0.0017	3.5e-08	6e-10	---
chr6	20537845	20537845	6:20537845	6_20537845_CA_C	6_20621238_T_C	6	new	rs2223621	1.04(0.98-1.1)	0.23	1.06(1.03-1.08)	4.5e-06	1.03(1.01-1.06)	0.0017	3.5e-08	2.17e-09	---
chr6	20542221	20542221	rs7758851	6_20542221_G_A	6_20621238_T_C	6	new	rs2223621	1.04(0.98-1.1)	0.23	1.06(1.03-1.08)	4.5e-06	1.03(1.01-1.06)	0.0017	3.5e-08	2.86e-08	---
chr6	20544699	20544699	rs12214315	6_20544699_C_T	6_20621238_T_C	6	new	rs2223621	1.04(0.98-1.1)	0.23	1.06(1.03-1.08)	4.5e-06	1.03(1.01-1.06)	0.0017	3.5e-08	2.39e-08	---
chr6	20550066	20550066	rs78287738	6_20550066_C_T	6_20621238_T_C	6	new	rs2223621	1.04(0.98-1.1)	0.23	1.06(1.03-1.08)	4.5e-06	1.03(1.01-1.06)	0.0017	3.5e-08	2.53e-08	---
chr6	20560435	20560435	rs17584626	6_20560435_A_T	6_20621238_T_C	6	new	rs2223621	1.04(0.98-1.1)	0.23	1.06(1.03-1.08)	4.5e-06	1.03(1.01-1.06)	0.0017	3.5e-08	2.19e-08	---
chr6	20570777	20570777	rs10946390	6_20570777_A_G	6_20621238_T_C	6	new	rs2223621	1.04(0.98-1.1)	0.23	1.06(1.03-1.08)	4.5e-06	1.03(1.01-1.06)	0.0017	3.5e-08	2.98e-08	---
chr6	20571750	20571750	rs62400061	6_20571750_T_C	6_20621238_T_C	6	new	rs2223621	1.04(0.98-1.1)	0.23	1.06(1.03-1.08)	4.5e-06	1.03(1.01-1.06)	0.0017	3.5e-08	2.61e-08	---
chr6	20586039	20586039	rs12213132	6_20586039_A_G	6_20621238_T_C	6	new	rs2223621	1.04(0.98-1.1)	0.23	1.06(1.03-1.08)	4.5e-06	1.03(1.01-1.06)	0.0017	3.5e-08	2.27e-08	---
chr6	20610730	20610730	rs188617336	6_20610730_C_T	6_20621238_T_C	6	new	rs2223621	1.04(0.98-1.1)	0.23	1.06(1.03-1.08)	4.5e-06	1.03(1.01-1.06)	0.0017	3.5e-08	2.46e-08	---
chr6	20621238	20621238	rs2223621	6_20621238_T_C	6_20621238_T_C	6	new	rs2223621	1.04(0.98-1.1)	0.23	1.06(1.03-1.08)	4.5e-06	1.03(1.01-1.06)	0.0017	3.5e-08	3.04e-10	---
chr6	20625634	20625634	rs2206579	6_20625634_A_G	6_20621238_T_C	6	new	rs2223621	1.04(0.98-1.1)	0.23	1.06(1.03-1.08)	4.5e-06	1.03(1.01-1.06)	0.0017	3.5e-08	2.68e-08	---
chr6	20626333	20626333	rs76235859	6_20626333_T_C	6_20621238_T_C	6	new	rs2223621	1.04(0.98-1.1)	0.23	1.06(1.03-1.08)	4.5e-06	1.03(1.01-1.06)	0.0017	3.5e-08	2.46e-08	---
chr6	20627777	20627777	rs2223620	6_20627777_C_T	6_20621238_T_C	6	new	rs2223621	1.04(0.98-1.1)	0.23	1.06(1.03-1.08)	4.5e-06	1.03(1.01-1.06)	0.0017	3.5e-08	2.08e-08	---
chr6	20627891	20627891	rs9465839	6_20627891_A_G	6_20621238_T_C	6	new	rs2223621	1.04(0.98-1.1)	0.23	1.06(1.03-1.08)	4.5e-06	1.03(1.01-1.06)	0.0017	3.5e-08	2.4e-08	---
chr6	20629788	20629788	rs9465842	6_20629788_G_C	6_20621238_T_C	6	new	rs2223621	1.04(0.98-1.1)	0.23	1.06(1.03-1.08)	4.5e-06	1.03(1.01-1.06)	0.0017	3.5e-08	1.79e-08	---
chr6	20632766	20632766	rs17224527	6_20632766_T_A	6_20621238_T_C	6	new	rs2223621	1.04(0.98-1.1)	0.23	1.06(1.03-1.08)	4.5e-06	1.03(1.01-1.06)	0.0017	3.5e-08	1.56e-08	---
chr6	20633297	20633297	rs9465845	6_20633297_G_T	6_20621238_T_C	6	new	rs2223621	1.04(0.98-1.1)	0.23	1.06(1.03-1.08)	4.5e-06	1.03(1.01-1.06)	0.0017	3.5e-08	6.19e-10	---
chr6	20639604	20639604	rs7758612	6_20639604_G_A	6_20621238_T_C	6	new	rs2223621	1.04(0.98-1.1)	0.23	1.06(1.03-1.08)	4.5e-06	1.03(1.01-1.06)	0.0017	3.5e-08	7.06e-10	---
chr6	20640316	20640316	rs9465851	6_20640316_C_T	6_20621238_T_C	6	new	rs2223621	1.04(0.98-1.1)	0.23	1.06(1.03-1.08)	4.5e-06	1.03(1.01-1.06)	0.0017	3.5e-08	4.45e-09	---
chr6	20640537	20640537	rs9460538	6_20640537_G_A	6_20621238_T_C	6	new	rs2223621	1.04(0.98-1.1)	0.23	1.06(1.03-1.08)	4.5e-06	1.03(1.01-1.06)	0.0017	3.5e-08	6.04e-10	---
chr6	20641900	20641900	rs9465852	6_20641900_G_A	6_20621238_T_C	6	new	rs2223621	1.04(0.98-1.1)	0.23	1.06(1.03-1.08)	4.5e-06	1.03(1.01-1.06)	0.0017	3.5e-08	6.16e-09	---
chr6	20642785	20642785	rs6925328	6_20642785_A_G	6_20621238_T_C	6	new	rs2223621	1.04(0.98-1.1)	0.23	1.06(1.03-1.08)	4.5e-06	1.03(1.01-1.06)	0.0017	3.5e-08	8.27e-09	---
chr6	20643752	20643752	rs2328531	6_20643752_A_G	6_20621238_T_C	6	new	rs2223621	1.04(0.98-1.1)	0.23	1.06(1.03-1.08)	4.5e-06	1.03(1.01-1.06)	0.0017	3.5e-08	6.52e-09	---
chr6	20645999	20645999	rs143684160	6_20645999_AATTTT_A	6_20621238_T_C	6	new	rs2223621	1.04(0.98-1.1)	0.23	1.06(1.03-1.08)	4.5e-06	1.03(1.01-1.06)	0.0017	3.5e-08	1.23e-08	---
chr6	20706418	20706418	rs75626419	6_20706418_C_T	6_20621238_T_C	6	new	rs2223621	1.04(0.98-1.1)	0.23	1.06(1.03-1.08)	4.5e-06	1.03(1.01-1.06)	0.0017	3.5e-08	5.63e-09	---
chr6	26189356	26189356	rs13204572	6_26189356_G_C	6_26680698_G_A	6	new	rs71557345	0.87(0.78-0.98)	0.025	0.92(0.88-0.96)	0.00013	0.91(0.87-0.96)	0.00018	8.5e-09	3.65e-09	---
chr6	26199903	26199903	rs34961555	6_26199903_C_T	6_26680698_G_A	6	new	rs71557345	0.87(0.78-0.98)	0.025	0.92(0.88-0.96)	0.00013	0.91(0.87-0.96)	0.00018	8.5e-09	3.95e-09	---
chr6	26266311	26266311	rs55706012	6_26266311_A_C	6_26680698_G_A	6	new	rs71557345	0.87(0.78-0.98)	0.025	0.92(0.88-0.96)	0.00013	0.91(0.87-0.96)	0.00018	8.5e-09	5.73e-09	---
chr6	26309908	26309908	rs10484439	6_26309908_G_A	6_26680698_G_A	6	new	rs71557345	0.87(0.78-0.98)	0.025	0.92(0.88-0.96)	0.00013	0.91(0.87-0.96)	0.00018	8.5e-09	1.06e-08	---
chr6	26316295	26316295	rs13220522	6_26316295_G_A	6_26680698_G_A	6	new	rs71557345	0.87(0.78-0.98)	0.025	0.92(0.88-0.96)	0.00013	0.91(0.87-0.96)	0.00018	8.5e-09	6.05e-09	---
chr6	26318262	26318262	rs35162296	6_26318262_C_T	6_26680698_G_A	6	new	rs71557345	0.87(0.78-0.98)	0.025	0.92(0.88-0.96)	0.00013	0.91(0.87-0.96)	0.00018	8.5e-09	1.17e-08	---
chr6	26326314	26326314	rs13210340	6_26326314_G_C	6_26680698_G_A	6	new	rs71557345	0.87(0.78-0.98)	0.025	0.92(0.88-0.96)	0.00013	0.91(0.87-0.96)	0.00018	8.5e-09	6.93e-09	---
chr6	26328353	26328353	rs34107459	6_26328353_T_C	6_26680698_G_A	6	new	rs71557345	0.87(0.78-0.98)	0.025	0.92(0.88-0.96)	0.00013	0.91(0.87-0.96)	0.00018	8.5e-09	7.04e-09	---
chr6	26336572	26336572	rs34158769	6_26336572_G_A	6_26680698_G_A	6	new	rs71557345	0.87(0.78-0.98)	0.025	0.92(0.88-0.96)	0.00013	0.91(0.87-0.96)	0.00018	8.5e-09	7.81e-09	---
chr6	26339131	26339131	rs35942569	6_26339131_A_G	6_26680698_G_A	6	new	rs71557345	0.87(0.78-0.98)	0.025	0.92(0.88-0.96)	0.00013	0.91(0.87-0.96)	0.00018	8.5e-09	1.92e-08	---
chr6	26408472	26408472	rs146863150	6_26408472_C_CATAT	6_26680698_G_A	6	new	rs71557345	0.87(0.78-0.98)	0.025	0.92(0.88-0.96)	0.00013	0.91(0.87-0.96)	0.00018	8.5e-09	1.7e-09	---
chr6	26408551	26408551	rs75782365	6_26408551_T_G	6_26680698_G_A	6	new	rs71557345	0.87(0.78-0.98)	0.025	0.92(0.88-0.96)	0.00013	0.91(0.87-0.96)	0.00018	8.5e-09	2.06e-09	---
chr6	26409890	26409890	rs41266839	6_26409890_G_C	6_26680698_G_A	6	new	rs71557345	0.87(0.78-0.98)	0.025	0.92(0.88-0.96)	0.00013	0.91(0.87-0.96)	0.00018	8.5e-09	1.87e-09	---
chr6	26441640	26441640	rs13220495	6_26441640_C_T	6_26680698_G_A	6	new	rs71557345	0.87(0.78-0.98)	0.025	0.92(0.88-0.96)	0.00013	0.91(0.87-0.96)	0.00018	8.5e-09	3.51e-09	---
chr6	26454363	26454363	rs34605993	6_26454363_C_T	6_26680698_G_A	6	new	rs71557345	0.87(0.78-0.98)	0.025	0.92(0.88-0.96)	0.00013	0.91(0.87-0.96)	0.00018	8.5e-09	2.16e-08	---
chr6	26454956	26454956	rs66757203	6_26454956_C_T	6_26680698_G_A	6	new	rs71557345	0.87(0.78-0.98)	0.025	0.92(0.88-0.96)	0.00013	0.91(0.87-0.96)	0.00018	8.5e-09	1.49e-08	---
chr6	26455814	26455814	rs35680819	6_26455814_T_C	6_26680698_G_A	6	new	rs71557345	0.87(0.78-0.98)	0.025	0.92(0.88-0.96)	0.00013	0.91(0.87-0.96)	0.00018	8.5e-09	2.27e-08	---
chr6	26456074	26456074	rs36033628	6_26456074_T_G	6_26680698_G_A	6	new	rs71557345	0.87(0.78-0.98)	0.025	0.92(0.88-0.96)	0.00013	0.91(0.87-0.96)	0.00018	8.5e-09	1.93e-08	---
chr6	26462104	26462104	rs35627490	6_26462104_C_T	6_26680698_G_A	6	new	rs71557345	0.87(0.78-0.98)	0.025	0.92(0.88-0.96)	0.00013	0.91(0.87-0.96)	0.00018	8.5e-09	2.56e-08	---
chr6	26463271	26463271	rs3823158	6_26463271_T_A	6_26680698_G_A	6	new	rs71557345	0.87(0.78-0.98)	0.025	0.92(0.88-0.96)	0.00013	0.91(0.87-0.96)	0.00018	8.5e-09	2.67e-08	---
chr6	26463574	26463574	rs13195401	6_26463574_G_T	6_26680698_G_A	6	new	rs71557345	0.87(0.78-0.98)	0.025	0.92(0.88-0.96)	0.00013	0.91(0.87-0.96)	0.00018	8.5e-09	1.55e-09	---
chr6	26463575	26463575	rs13195402	6_26463575_G_T	6_26680698_G_A	6	new	rs71557345	0.87(0.78-0.98)	0.025	0.92(0.88-0.96)	0.00013	0.91(0.87-0.96)	0.00018	8.5e-09	1.74e-09	---
chr6	26463660	26463660	rs13195509	6_26463660_G_A	6_26680698_G_A	6	new	rs71557345	0.87(0.78-0.98)	0.025	0.92(0.88-0.96)	0.00013	0.91(0.87-0.96)	0.00018	8.5e-09	2.54e-08	---
chr6	26468326	26468326	rs3734542	6_26468326_G_A	6_26680698_G_A	6	new	rs71557345	0.87(0.78-0.98)	0.025	0.92(0.88-0.96)	0.00013	0.91(0.87-0.96)	0.00018	8.5e-09	2.64e-08	---
chr6	26468545	26468545	rs3734543	6_26468545_G_C	6_26680698_G_A	6	new	rs71557345	0.87(0.78-0.98)	0.025	0.92(0.88-0.96)	0.00013	0.91(0.87-0.96)	0.00018	8.5e-09	2.64e-08	---
chr6	26478252	26478252	rs34104395	6_26478252_C_T	6_26680698_G_A	6	new	rs71557345	0.87(0.78-0.98)	0.025	0.92(0.88-0.96)	0.00013	0.91(0.87-0.96)	0.00018	8.5e-09	2.39e-08	---
chr6	26498758	26498758	rs72843784	6_26498758_G_T	6_26680698_G_A	6	new	rs71557345	0.87(0.78-0.98)	0.025	0.92(0.88-0.96)	0.00013	0.91(0.87-0.96)	0.00018	8.5e-09	1.91e-09	---
chr6	26499185	26499185	rs13220261	6_26499185_C_T	6_26680698_G_A	6	new	rs71557345	0.87(0.78-0.98)	0.025	0.92(0.88-0.96)	0.00013	0.91(0.87-0.96)	0.00018	8.5e-09	2.54e-08	---
chr6	26509382	26509382	rs35555795	6_26509382_C_T	6_26680698_G_A	6	new	rs71557345	0.87(0.78-0.98)	0.025	0.92(0.88-0.96)	0.00013	0.91(0.87-0.96)	0.00018	8.5e-09	2.52e-08	---
chr6	26511744	26511744	rs34148261	6_26511744_G_C	6_26680698_G_A	6	new	rs71557345	0.87(0.78-0.98)	0.025	0.92(0.88-0.96)	0.00013	0.91(0.87-0.96)	0.00018	8.5e-09	2.63e-08	---
chr6	26529890	26529890	rs35433030	6_26529890_G_A	6_26680698_G_A	6	new	rs71557345	0.87(0.78-0.98)	0.025	0.92(0.88-0.96)	0.00013	0.91(0.87-0.96)	0.00018	8.5e-09	2.71e-08	---
chr6	26530376	26530376	rs66941101	6_26530376_C_T	6_26680698_G_A	6	new	rs71557345	0.87(0.78-0.98)	0.025	0.92(0.88-0.96)	0.00013	0.91(0.87-0.96)	0.00018	8.5e-09	2.71e-08	---
chr6	26549212	26549212	rs34246779	6_26549212_G_A	6_26680698_G_A	6	new	rs71557345	0.87(0.78-0.98)	0.025	0.92(0.88-0.96)	0.00013	0.91(0.87-0.96)	0.00018	8.5e-09	2.55e-08	---
chr6	26550144	26550144	rs72845428	6_26550144_C_T	6_26680698_G_A	6	new	rs71557345	0.87(0.78-0.98)	0.025	0.92(0.88-0.96)	0.00013	0.91(0.87-0.96)	0.00018	8.5e-09	2.56e-08	---
chr6	26562269	26562269	rs35277236	6_26562269_G_T	6_26680698_G_A	6	new	rs71557345	0.87(0.78-0.98)	0.025	0.92(0.88-0.96)	0.00013	0.91(0.87-0.96)	0.00018	8.5e-09	2.37e-08	---
chr6	26563864	26563864	rs72844462	6_26563864_A_C	6_26680698_G_A	6	new	rs71557345	0.87(0.78-0.98)	0.025	0.92(0.88-0.96)	0.00013	0.91(0.87-0.96)	0.00018	8.5e-09	2.21e-08	---
chr6	26569135	26569135	rs36162392	6_26569135_T_C	6_26680698_G_A	6	new	rs71557345	0.87(0.78-0.98)	0.025	0.92(0.88-0.96)	0.00013	0.91(0.87-0.96)	0.00018	8.5e-09	2.18e-08	---
chr6	26582035	26582035	rs13198716	6_26582035_C_T	6_26680698_G_A	6	new	rs71557345	0.87(0.78-0.98)	0.025	0.92(0.88-0.96)	0.00013	0.91(0.87-0.96)	0.00018	8.5e-09	2.33e-09	---
chr6	26587373	26587373	rs13190739	6_26587373_G_T	6_26680698_G_A	6	new	rs71557345	0.87(0.78-0.98)	0.025	0.92(0.88-0.96)	0.00013	0.91(0.87-0.96)	0.00018	8.5e-09	1.34e-08	---
chr6	26593037	26593037	rs34781270	6_26593037_A_G	6_26680698_G_A	6	new	rs71557345	0.87(0.78-0.98)	0.025	0.92(0.88-0.96)	0.00013	0.91(0.87-0.96)	0.00018	8.5e-09	1.33e-08	---
chr6	26593275	26593275	rs35400317	6_26593275_C_T	6_26680698_G_A	6	new	rs71557345	0.87(0.78-0.98)	0.025	0.92(0.88-0.96)	0.00013	0.91(0.87-0.96)	0.00018	8.5e-09	1.37e-09	---
chr6	26593383	26593383	rs112340616	6_26593383_G_GAAA	6_26680698_G_A	6	new	rs71557345	0.87(0.78-0.98)	0.025	0.92(0.88-0.96)	0.00013	0.91(0.87-0.96)	0.00018	8.5e-09	1.27e-08	---
chr6	26599509	26599509	rs45527431	6_26599509_A_G	6_26680698_G_A	6	new	rs71557345	0.87(0.78-0.98)	0.025	0.92(0.88-0.96)	0.00013	0.91(0.87-0.96)	0.00018	8.5e-09	1.64e-09	---
chr6	26603924	26603924	rs35076545	6_26603924_C_A	6_26680698_G_A	6	new	rs71557345	0.87(0.78-0.98)	0.025	0.92(0.88-0.96)	0.00013	0.91(0.87-0.96)	0.00018	8.5e-09	1.36e-08	---
chr6	26609989	26609989	rs13212985	6_26609989_G_C	6_26680698_G_A	6	new	rs71557345	0.87(0.78-0.98)	0.025	0.92(0.88-0.96)	0.00013	0.91(0.87-0.96)	0.00018	8.5e-09	1.34e-08	---
chr6	26610713	26610713	rs34969311	6_26610713_CTG_C	6_26680698_G_A	6	new	rs71557345	0.87(0.78-0.98)	0.025	0.92(0.88-0.96)	0.00013	0.91(0.87-0.96)	0.00018	8.5e-09	1.82e-09	---
chr6	26631568	26631568	rs66488313	6_26631568_G_T	6_26680698_G_A	6	new	rs71557345	0.87(0.78-0.98)	0.025	0.92(0.88-0.96)	0.00013	0.91(0.87-0.96)	0.00018	8.5e-09	1.52e-09	---
chr6	26633711	26633711	rs67777156	6_26633711_T_A	6_26680698_G_A	6	new	rs71557345	0.87(0.78-0.98)	0.025	0.92(0.88-0.96)	0.00013	0.91(0.87-0.96)	0.00018	8.5e-09	1.24e-09	---
chr6	26637724	26637724	rs139332558	6_26637724_T_C	6_26680698_G_A	6	new	rs71557345	0.87(0.78-0.98)	0.025	0.92(0.88-0.96)	0.00013	0.91(0.87-0.96)	0.00018	8.5e-09	1.16e-09	---
chr6	26651053	26651053	rs13201782	6_26651053_T_A	6_26680698_G_A	6	new	rs71557345	0.87(0.78-0.98)	0.025	0.92(0.88-0.96)	0.00013	0.91(0.87-0.96)	0.00018	8.5e-09	1.24e-09	---
chr6	26668832	26668832	rs70981105	6_26668832_TG_T	6_26680698_G_A	6	new	rs71557345	0.87(0.78-0.98)	0.025	0.92(0.88-0.96)	0.00013	0.91(0.87-0.96)	0.00018	8.5e-09	1.03e-08	---
chr6	26673953	26673953	rs376904407	6_26673953_C_T	6_26680698_G_A	6	new	rs71557345	0.87(0.78-0.98)	0.025	0.92(0.88-0.96)	0.00013	0.91(0.87-0.96)	0.00018	8.5e-09	1.03e-09	---
chr6	26678939	26678939	rs74896051	6_26678939_A_G	6_26680698_G_A	6	new	rs71557345	0.87(0.78-0.98)	0.025	0.92(0.88-0.96)	0.00013	0.91(0.87-0.96)	0.00018	8.5e-09	1.07e-09	---
chr6	26680698	26680698	rs71557345	6_26680698_G_A	6_26680698_G_A	6	new	rs71557345	0.87(0.78-0.98)	0.025	0.92(0.88-0.96)	0.00013	0.91(0.87-0.96)	0.00018	8.5e-09	3.87e-10	---
chr6	26706602	26706602	rs76091509	6_26706602_T_A	6_26680698_G_A	6	new	rs71557345	0.87(0.78-0.98)	0.025	0.92(0.88-0.96)	0.00013	0.91(0.87-0.96)	0.00018	8.5e-09	6.33e-10	---
chr6	26747550	26747550	rs138969672	6_26747550_G_GA	6_26680698_G_A	6	new	rs71557345	0.87(0.78-0.98)	0.025	0.92(0.88-0.96)	0.00013	0.91(0.87-0.96)	0.00018	8.5e-09	5.22e-09	---
chr6	26749353	26749353	6:26749353	6_26749353_T_C	6_26680698_G_A	6	new	rs71557345	0.87(0.78-0.98)	0.025	0.92(0.88-0.96)	0.00013	0.91(0.87-0.96)	0.00018	8.5e-09	2.02e-08	---
chr6	26755915	26755915	rs13213200	6_26755915_C_T	6_26680698_G_A	6	new	rs71557345	0.87(0.78-0.98)	0.025	0.92(0.88-0.96)	0.00013	0.91(0.87-0.96)	0.00018	8.5e-09	1.05e-08	---
chr6	26759130	26759130	rs71881107	6_26759130_CTATTTATT_C	6_26680698_G_A	6	new	rs71557345	0.87(0.78-0.98)	0.025	0.92(0.88-0.96)	0.00013	0.91(0.87-0.96)	0.00018	8.5e-09	9.66e-09	---
chr6	26761282	26761282	rs34195881	6_26761282_ATG_A	6_26680698_G_A	6	new	rs71557345	0.87(0.78-0.98)	0.025	0.92(0.88-0.96)	0.00013	0.91(0.87-0.96)	0.00018	8.5e-09	1.1e-08	---
chr6	26761745	26761745	rs34244947	6_26761745_T_C	6_26680698_G_A	6	new	rs71557345	0.87(0.78-0.98)	0.025	0.92(0.88-0.96)	0.00013	0.91(0.87-0.96)	0.00018	8.5e-09	8e-09	---
chr6	26762087	26762087	rs13216484	6_26762087_C_T	6_26680698_G_A	6	new	rs71557345	0.87(0.78-0.98)	0.025	0.92(0.88-0.96)	0.00013	0.91(0.87-0.96)	0.00018	8.5e-09	8.06e-09	---
chr6	26798784	26798784	rs371152854	6_26798784_G_A	6_26680698_G_A	6	new	rs71557345	0.87(0.78-0.98)	0.025	0.92(0.88-0.96)	0.00013	0.91(0.87-0.96)	0.00018	8.5e-09	3.36e-08	---
chr6	26798796	26798796	rs374593247	6_26798796_G_T	6_26680698_G_A	6	new	rs71557345	0.87(0.78-0.98)	0.025	0.92(0.88-0.96)	0.00013	0.91(0.87-0.96)	0.00018	8.5e-09	3.36e-08	---
chr6	26799828	26799828	rs7454868	6_26799828_C_G	6_26680698_G_A	6	new	rs71557345	0.87(0.78-0.98)	0.025	0.92(0.88-0.96)	0.00013	0.91(0.87-0.96)	0.00018	8.5e-09	1.15e-08	---
chr6	26824920	26824920	rs55664827	6_26824920_T_C	6_26680698_G_A	6	new	rs71557345	0.87(0.78-0.98)	0.025	0.92(0.88-0.96)	0.00013	0.91(0.87-0.96)	0.00018	8.5e-09	3.07e-08	---
chr6	26828359	26828359	rs190945449	6_26828359_C_T	6_26680698_G_A	6	new	rs71557345	0.87(0.78-0.98)	0.025	0.92(0.88-0.96)	0.00013	0.91(0.87-0.96)	0.00018	8.5e-09	2.97e-08	---
chr6	26843517	26843517	rs57440165	6_26843517_A_C	6_26680698_G_A	6	new	rs71557345	0.87(0.78-0.98)	0.025	0.92(0.88-0.96)	0.00013	0.91(0.87-0.96)	0.00018	8.5e-09	3.36e-09	---
chr6	26851415	26851415	rs77666565	6_26851415_G_A	6_26680698_G_A	6	new	rs71557345	0.87(0.78-0.98)	0.025	0.92(0.88-0.96)	0.00013	0.91(0.87-0.96)	0.00018	8.5e-09	2.96e-08	---
chr6	26887821	26887821	rs74689501	6_26887821_G_A	6_26680698_G_A	6	new	rs71557345	0.87(0.78-0.98)	0.025	0.92(0.88-0.96)	0.00013	0.91(0.87-0.96)	0.00018	8.5e-09	3.03e-08	---
chr6	26895248	26895248	rs58060922	6_26895248_C_A	6_26680698_G_A	6	new	rs71557345	0.87(0.78-0.98)	0.025	0.92(0.88-0.96)	0.00013	0.91(0.87-0.96)	0.00018	8.5e-09	3.43e-08	---
chr6	26903379	26903379	rs71206067	6_26903379_C_T	6_26680698_G_A	6	new	rs71557345	0.87(0.78-0.98)	0.025	0.92(0.88-0.96)	0.00013	0.91(0.87-0.96)	0.00018	8.5e-09	1.41e-09	---
chr6	26903585	26903585	rs71557378	6_26903585_T_G	6_26680698_G_A	6	new	rs71557345	0.87(0.78-0.98)	0.025	0.92(0.88-0.96)	0.00013	0.91(0.87-0.96)	0.00018	8.5e-09	3.5e-09	---
chr6	26909096	26909096	rs60882115	6_26909096_C_G	6_26680698_G_A	6	new	rs71557345	0.87(0.78-0.98)	0.025	0.92(0.88-0.96)	0.00013	0.91(0.87-0.96)	0.00018	8.5e-09	3.51e-09	---
chr6	26915439	26915439	rs374577630	6_26915439_T_G	6_26680698_G_A	6	new	rs71557345	0.87(0.78-0.98)	0.025	0.92(0.88-0.96)	0.00013	0.91(0.87-0.96)	0.00018	8.5e-09	3.03e-09	---
chr6	26921528	26921528	rs183280845	6_26921528_G_A	6_26680698_G_A	6	new	rs71557345	0.87(0.78-0.98)	0.025	0.92(0.88-0.96)	0.00013	0.91(0.87-0.96)	0.00018	8.5e-09	3.7e-09	---
chr6	26924357	26924357	6:26924357	6_26924357_C_G	6_26680698_G_A	6	new	rs71557345	0.87(0.78-0.98)	0.025	0.92(0.88-0.96)	0.00013	0.91(0.87-0.96)	0.00018	8.5e-09	3.63e-09	---
chr6	26925914	26925914	6:26925914	6_26925914_TTGTG_T	6_26680698_G_A	6	new	rs71557345	0.87(0.78-0.98)	0.025	0.92(0.88-0.96)	0.00013	0.91(0.87-0.96)	0.00018	8.5e-09	1.63e-09	---
chr6	26927602	26927602	rs80264589	6_26927602_G_A	6_26680698_G_A	6	new	rs71557345	0.87(0.78-0.98)	0.025	0.92(0.88-0.96)	0.00013	0.91(0.87-0.96)	0.00018	8.5e-09	3.66e-09	---
chr6	26935379	26935379	rs35173303	6_26935379_C_T	6_26680698_G_A	6	new	rs71557345	0.87(0.78-0.98)	0.025	0.92(0.88-0.96)	0.00013	0.91(0.87-0.96)	0.00018	8.5e-09	3.74e-09	---
chr6	26942146	26942146	rs66975207	6_26942146_A_C	6_26680698_G_A	6	new	rs71557345	0.87(0.78-0.98)	0.025	0.92(0.88-0.96)	0.00013	0.91(0.87-0.96)	0.00018	8.5e-09	3.29e-09	---
chr6	26946687	26946687	rs35869525	6_26946687_C_T	6_26680698_G_A	6	new	rs71557345	0.87(0.78-0.98)	0.025	0.92(0.88-0.96)	0.00013	0.91(0.87-0.96)	0.00018	8.5e-09	4.85e-09	---
chr6	26949672	26949672	rs34816374	6_26949672_A_G	6_26680698_G_A	6	new	rs71557345	0.87(0.78-0.98)	0.025	0.92(0.88-0.96)	0.00013	0.91(0.87-0.96)	0.00018	8.5e-09	3.88e-09	---
chr6	26961280	26961280	rs34546498	6_26961280_C_T	6_26680698_G_A	6	new	rs71557345	0.87(0.78-0.98)	0.025	0.92(0.88-0.96)	0.00013	0.91(0.87-0.96)	0.00018	8.5e-09	9.18e-10	---
chr6	27054772	27054772	rs67092078	6_27054772_G_A	6_26680698_G_A	6	new	rs71557345	0.87(0.78-0.98)	0.025	0.92(0.88-0.96)	0.00013	0.91(0.87-0.96)	0.00018	8.5e-09	3.79e-09	---
chr6	27072542	27072542	rs55834529	6_27072542_A_G	6_26680698_G_A	6	new	rs71557345	0.87(0.78-0.98)	0.025	0.92(0.88-0.96)	0.00013	0.91(0.87-0.96)	0.00018	8.5e-09	2.7e-09	---
chr6	27091661	27091661	rs66462181	6_27091661_T_C	6_26680698_G_A	6	new	rs71557345	0.87(0.78-0.98)	0.025	0.92(0.88-0.96)	0.00013	0.91(0.87-0.96)	0.00018	8.5e-09	4.06e-09	---
chr6	27141904	27141904	rs35768595	6_27141904_C_T	6_26680698_G_A	6	new	rs71557345	0.87(0.78-0.98)	0.025	0.92(0.88-0.96)	0.00013	0.91(0.87-0.96)	0.00018	8.5e-09	3.16e-09	---
chr6	27145341	27145341	rs35565446	6_27145341_C_T	6_26680698_G_A	6	new	rs71557345	0.87(0.78-0.98)	0.025	0.92(0.88-0.96)	0.00013	0.91(0.87-0.96)	0.00018	8.5e-09	3.26e-09	---
chr6	28436014	28436014	rs138024639	6_28436014_TAAACATA_T	6_28926220_G_C	6	old	rs9257408	1.07(1.01-1.14)	0.022	1.05(1.02-1.07)	0.00014	1.02(1-1.04)	0.037	6.5e-06	2.57e-09	---
chr6	28436145	28436145	rs55690788	6_28436145_T_C	6_28926220_G_C	6	old	rs9257408	1.07(1.01-1.14)	0.022	1.05(1.02-1.07)	0.00014	1.02(1-1.04)	0.037	6.5e-06	3.13e-09	---
chr6	28437763	28437763	rs34349668	6_28437763_AGAG_A	6_28926220_G_C	6	old	rs9257408	1.07(1.01-1.14)	0.022	1.05(1.02-1.07)	0.00014	1.02(1-1.04)	0.037	6.5e-06	2.68e-09	---
chr6	28453618	28453618	rs34676049	6_28453618_T_G	6_28926220_G_C	6	old	rs9257408	1.07(1.01-1.14)	0.022	1.05(1.02-1.07)	0.00014	1.02(1-1.04)	0.037	6.5e-06	3.33e-09	---
chr6	28482917	28482917	rs13191038	6_28482917_T_C	6_28926220_G_C	6	old	rs9257408	1.07(1.01-1.14)	0.022	1.05(1.02-1.07)	0.00014	1.02(1-1.04)	0.037	6.5e-06	3.3e-09	---
chr6	28562247	28562247	rs34119086	6_28562247_TG_T	6_28926220_G_C	6	old	rs9257408	1.07(1.01-1.14)	0.022	1.05(1.02-1.07)	0.00014	1.02(1-1.04)	0.037	6.5e-06	8.44e-09	---
chr6	28576143	28576143	rs4947336	6_28576143_T_A	6_28926220_G_C	6	old	rs9257408	1.07(1.01-1.14)	0.022	1.05(1.02-1.07)	0.00014	1.02(1-1.04)	0.037	6.5e-06	8.82e-09	---
chr6	28619353	28619353	rs34724414	6_28619353_A_G	6_28926220_G_C	6	old	rs9257408	1.07(1.01-1.14)	0.022	1.05(1.02-1.07)	0.00014	1.02(1-1.04)	0.037	6.5e-06	9.97e-09	---
chr6	28630691	28630691	rs13194504	6_28630691_G_A	6_28926220_G_C	6	old	rs9257408	1.07(1.01-1.14)	0.022	1.05(1.02-1.07)	0.00014	1.02(1-1.04)	0.037	6.5e-06	9.69e-09	---
chr6	28667669	28667669	rs35044849	6_28667669_A_G	6_28926220_G_C	6	old	rs9257408	1.07(1.01-1.14)	0.022	1.05(1.02-1.07)	0.00014	1.02(1-1.04)	0.037	6.5e-06	1.52e-08	---
chr6	28671343	28671343	rs6908726	6_28671343_G_C	6_28926220_G_C	6	old	rs9257408	1.07(1.01-1.14)	0.022	1.05(1.02-1.07)	0.00014	1.02(1-1.04)	0.037	6.5e-06	9.63e-08	+++
chr6	28673434	28673434	rs35243068	6_28673434_G_A	6_28926220_G_C	6	old	rs9257408	1.07(1.01-1.14)	0.022	1.05(1.02-1.07)	0.00014	1.02(1-1.04)	0.037	6.5e-06	3.62e-08	---
chr6	28673998	28673998	rs4713177	6_28673998_A_G	6_28926220_G_C	6	old	rs9257408	1.07(1.01-1.14)	0.022	1.05(1.02-1.07)	0.00014	1.02(1-1.04)	0.037	6.5e-06	4.45e-08	+++
chr6	28681415	28681415	rs13217472	6_28681415_G_A	6_28926220_G_C	6	old	rs9257408	1.07(1.01-1.14)	0.022	1.05(1.02-1.07)	0.00014	1.02(1-1.04)	0.037	6.5e-06	3.31e-08	---
chr6	28682725	28682725	rs9393926	6_28682725_G_A	6_28926220_G_C	6	old	rs9257408	1.07(1.01-1.14)	0.022	1.05(1.02-1.07)	0.00014	1.02(1-1.04)	0.037	6.5e-06	1.04e-07	+++
chr6	28696063	28696063	rs9393929	6_28696063_A_C	6_28926220_G_C	6	old	rs9257408	1.07(1.01-1.14)	0.022	1.05(1.02-1.07)	0.00014	1.02(1-1.04)	0.037	6.5e-06	1.02e-07	+++
chr6	28701492	28701492	rs6456835	6_28701492_G_C	6_28926220_G_C	6	old	rs9257408	1.07(1.01-1.14)	0.022	1.05(1.02-1.07)	0.00014	1.02(1-1.04)	0.037	6.5e-06	1.02e-07	+++
chr6	28705074	28705074	rs1311911	6_28705074_G_T	6_28926220_G_C	6	old	rs9257408	1.07(1.01-1.14)	0.022	1.05(1.02-1.07)	0.00014	1.02(1-1.04)	0.037	6.5e-06	1.03e-07	---
chr6	28707153	28707153	6:28707153	6_28707153_TTATTA_T	6_28926220_G_C	6	old	rs9257408	1.07(1.01-1.14)	0.022	1.05(1.02-1.07)	0.00014	1.02(1-1.04)	0.037	6.5e-06	5.57e-08	---
chr6	28709151	28709151	6:28709151	6_28709151_GGTT_G	6_28926220_G_C	6	old	rs9257408	1.07(1.01-1.14)	0.022	1.05(1.02-1.07)	0.00014	1.02(1-1.04)	0.037	6.5e-06	1.39e-08	---
chr6	28712663	28712663	rs1233579	6_28712663_A_G	6_28926220_G_C	6	old	rs9257408	1.07(1.01-1.14)	0.022	1.05(1.02-1.07)	0.00014	1.02(1-1.04)	0.037	6.5e-06	3.11e-08	---
chr6	28713118	28713118	rs148082388	6_28713118_G_GAC	6_28926220_G_C	6	old	rs9257408	1.07(1.01-1.14)	0.022	1.05(1.02-1.07)	0.00014	1.02(1-1.04)	0.037	6.5e-06	2.59e-08	---
chr6	28713725	28713725	rs1233580	6_28713725_G_C	6_28926220_G_C	6	old	rs9257408	1.07(1.01-1.14)	0.022	1.05(1.02-1.07)	0.00014	1.02(1-1.04)	0.037	6.5e-06	3.15e-08	---
chr6	28713847	28713847	rs1233581	6_28713847_C_T	6_28926220_G_C	6	old	rs9257408	1.07(1.01-1.14)	0.022	1.05(1.02-1.07)	0.00014	1.02(1-1.04)	0.037	6.5e-06	3.14e-08	---
chr6	28715566	28715566	rs1233583	6_28715566_G_A	6_28926220_G_C	6	old	rs9257408	1.07(1.01-1.14)	0.022	1.05(1.02-1.07)	0.00014	1.02(1-1.04)	0.037	6.5e-06	3.58e-08	---
chr6	28716854	28716854	rs1311912	6_28716854_A_T	6_28926220_G_C	6	old	rs9257408	1.07(1.01-1.14)	0.022	1.05(1.02-1.07)	0.00014	1.02(1-1.04)	0.037	6.5e-06	2.9e-08	---
chr6	28717178	28717178	rs1311913	6_28717178_G_C	6_28926220_G_C	6	old	rs9257408	1.07(1.01-1.14)	0.022	1.05(1.02-1.07)	0.00014	1.02(1-1.04)	0.037	6.5e-06	2.87e-08	---
chr6	28719976	28719976	rs1233588	6_28719976_T_C	6_28926220_G_C	6	old	rs9257408	1.07(1.01-1.14)	0.022	1.05(1.02-1.07)	0.00014	1.02(1-1.04)	0.037	6.5e-06	2.85e-08	---
chr6	28723421	28723421	rs9257133	6_28723421_C_T	6_28926220_G_C	6	old	rs9257408	1.07(1.01-1.14)	0.022	1.05(1.02-1.07)	0.00014	1.02(1-1.04)	0.037	6.5e-06	2.38e-08	---
chr6	28723841	28723841	rs9257136	6_28723841_A_C	6_28926220_G_C	6	old	rs9257408	1.07(1.01-1.14)	0.022	1.05(1.02-1.07)	0.00014	1.02(1-1.04)	0.037	6.5e-06	2.83e-08	---
chr6	28723949	28723949	rs9257137	6_28723949_T_C	6_28926220_G_C	6	old	rs9257408	1.07(1.01-1.14)	0.022	1.05(1.02-1.07)	0.00014	1.02(1-1.04)	0.037	6.5e-06	2.78e-08	---
chr6	28723960	28723960	rs1238262	6_28723960_C_T	6_28926220_G_C	6	old	rs9257408	1.07(1.01-1.14)	0.022	1.05(1.02-1.07)	0.00014	1.02(1-1.04)	0.037	6.5e-06	2.78e-08	---
chr6	28724082	28724082	rs1742743	6_28724082_A_T	6_28926220_G_C	6	old	rs9257408	1.07(1.01-1.14)	0.022	1.05(1.02-1.07)	0.00014	1.02(1-1.04)	0.037	6.5e-06	2.4e-08	---
chr6	28724340	28724340	rs147535481	6_28724340_A_AAAAAC	6_28926220_G_C	6	old	rs9257408	1.07(1.01-1.14)	0.022	1.05(1.02-1.07)	0.00014	1.02(1-1.04)	0.037	6.5e-06	2.24e-08	---
chr6	28726815	28726815	rs1233593	6_28726815_C_T	6_28926220_G_C	6	old	rs9257408	1.07(1.01-1.14)	0.022	1.05(1.02-1.07)	0.00014	1.02(1-1.04)	0.037	6.5e-06	2.78e-08	---
chr6	28727121	28727121	rs9257140	6_28727121_G_A	6_28926220_G_C	6	old	rs9257408	1.07(1.01-1.14)	0.022	1.05(1.02-1.07)	0.00014	1.02(1-1.04)	0.037	6.5e-06	2.99e-08	---
chr6	28727343	28727343	rs1233594	6_28727343_A_G	6_28926220_G_C	6	old	rs9257408	1.07(1.01-1.14)	0.022	1.05(1.02-1.07)	0.00014	1.02(1-1.04)	0.037	6.5e-06	2.76e-08	---
chr6	28731188	28731188	rs1233599	6_28731188_T_G	6_28926220_G_C	6	old	rs9257408	1.07(1.01-1.14)	0.022	1.05(1.02-1.07)	0.00014	1.02(1-1.04)	0.037	6.5e-06	2.78e-08	---
chr6	28732514	28732514	rs1233600	6_28732514_A_G	6_28926220_G_C	6	old	rs9257408	1.07(1.01-1.14)	0.022	1.05(1.02-1.07)	0.00014	1.02(1-1.04)	0.037	6.5e-06	2.8e-08	---
chr6	28734676	28734676	rs1233604	6_28734676_G_A	6_28926220_G_C	6	old	rs9257408	1.07(1.01-1.14)	0.022	1.05(1.02-1.07)	0.00014	1.02(1-1.04)	0.037	6.5e-06	2.79e-08	---
chr6	28734987	28734987	rs9278063	6_28734987_CAA_C	6_28926220_G_C	6	old	rs9257408	1.07(1.01-1.14)	0.022	1.05(1.02-1.07)	0.00014	1.02(1-1.04)	0.037	6.5e-06	2.36e-08	---
chr6	28736201	28736201	rs1233609	6_28736201_G_A	6_28926220_G_C	6	old	rs9257408	1.07(1.01-1.14)	0.022	1.05(1.02-1.07)	0.00014	1.02(1-1.04)	0.037	6.5e-06	2.67e-08	---
chr6	28736988	28736988	rs1233610	6_28736988_A_G	6_28926220_G_C	6	old	rs9257408	1.07(1.01-1.14)	0.022	1.05(1.02-1.07)	0.00014	1.02(1-1.04)	0.037	6.5e-06	2.65e-08	---
chr6	28737054	28737054	rs1233611	6_28737054_A_G	6_28926220_G_C	6	old	rs9257408	1.07(1.01-1.14)	0.022	1.05(1.02-1.07)	0.00014	1.02(1-1.04)	0.037	6.5e-06	2.65e-08	---
chr6	28738429	28738429	rs1233612	6_28738429_G_T	6_28926220_G_C	6	old	rs9257408	1.07(1.01-1.14)	0.022	1.05(1.02-1.07)	0.00014	1.02(1-1.04)	0.037	6.5e-06	2.62e-08	---
chr6	28741734	28741734	rs9257167	6_28741734_C_A	6_28926220_G_C	6	old	rs9257408	1.07(1.01-1.14)	0.022	1.05(1.02-1.07)	0.00014	1.02(1-1.04)	0.037	6.5e-06	2.63e-08	---
chr6	28742086	28742086	rs1311914	6_28742086_G_C	6_28926220_G_C	6	old	rs9257408	1.07(1.01-1.14)	0.022	1.05(1.02-1.07)	0.00014	1.02(1-1.04)	0.037	6.5e-06	2.57e-08	---
chr6	28742850	28742850	rs1233618	6_28742850_G_A	6_28926220_G_C	6	old	rs9257408	1.07(1.01-1.14)	0.022	1.05(1.02-1.07)	0.00014	1.02(1-1.04)	0.037	6.5e-06	2.56e-08	---
chr6	28745452	28745452	rs1233619	6_28745452_G_A	6_28926220_G_C	6	old	rs9257408	1.07(1.01-1.14)	0.022	1.05(1.02-1.07)	0.00014	1.02(1-1.04)	0.037	6.5e-06	2.54e-08	---
chr6	28746171	28746171	rs1233620	6_28746171_G_A	6_28926220_G_C	6	old	rs9257408	1.07(1.01-1.14)	0.022	1.05(1.02-1.07)	0.00014	1.02(1-1.04)	0.037	6.5e-06	2.54e-08	---
chr6	28748281	28748281	rs1233623	6_28748281_C_T	6_28926220_G_C	6	old	rs9257408	1.07(1.01-1.14)	0.022	1.05(1.02-1.07)	0.00014	1.02(1-1.04)	0.037	6.5e-06	2.55e-08	---
chr6	28750265	28750265	rs1233624	6_28750265_G_C	6_28926220_G_C	6	old	rs9257408	1.07(1.01-1.14)	0.022	1.05(1.02-1.07)	0.00014	1.02(1-1.04)	0.037	6.5e-06	2.59e-08	---
chr6	28751041	28751041	rs1311917	6_28751041_G_T	6_28926220_G_C	6	old	rs9257408	1.07(1.01-1.14)	0.022	1.05(1.02-1.07)	0.00014	1.02(1-1.04)	0.037	6.5e-06	2.61e-08	---
chr6	28753646	28753646	rs1311918	6_28753646_C_T	6_28926220_G_C	6	old	rs9257408	1.07(1.01-1.14)	0.022	1.05(1.02-1.07)	0.00014	1.02(1-1.04)	0.037	6.5e-06	2.69e-08	---
chr6	28754431	28754431	rs139871222	6_28754431_AT_A	6_28926220_G_C	6	old	rs9257408	1.07(1.01-1.14)	0.022	1.05(1.02-1.07)	0.00014	1.02(1-1.04)	0.037	6.5e-06	2.11e-08	---
chr6	28756008	28756008	rs9257183	6_28756008_A_T	6_28926220_G_C	6	old	rs9257408	1.07(1.01-1.14)	0.022	1.05(1.02-1.07)	0.00014	1.02(1-1.04)	0.037	6.5e-06	2.81e-08	---
chr6	28756088	28756088	rs9257184	6_28756088_C_T	6_28926220_G_C	6	old	rs9257408	1.07(1.01-1.14)	0.022	1.05(1.02-1.07)	0.00014	1.02(1-1.04)	0.037	6.5e-06	2.81e-08	---
chr6	28756902	28756902	rs9257187	6_28756902_C_T	6_28926220_G_C	6	old	rs9257408	1.07(1.01-1.14)	0.022	1.05(1.02-1.07)	0.00014	1.02(1-1.04)	0.037	6.5e-06	2.79e-08	---
chr6	28757489	28757489	rs9257188	6_28757489_T_C	6_28926220_G_C	6	old	rs9257408	1.07(1.01-1.14)	0.022	1.05(1.02-1.07)	0.00014	1.02(1-1.04)	0.037	6.5e-06	2.79e-08	---
chr6	28757555	28757555	rs9257189	6_28757555_C_G	6_28926220_G_C	6	old	rs9257408	1.07(1.01-1.14)	0.022	1.05(1.02-1.07)	0.00014	1.02(1-1.04)	0.037	6.5e-06	2.76e-08	---
chr6	28764103	28764103	rs7764642	6_28764103_T_A	6_28926220_G_C	6	old	rs9257408	1.07(1.01-1.14)	0.022	1.05(1.02-1.07)	0.00014	1.02(1-1.04)	0.037	6.5e-06	2.94e-08	---
chr6	28765098	28765098	rs9257191	6_28765098_C_G	6_28926220_G_C	6	old	rs9257408	1.07(1.01-1.14)	0.022	1.05(1.02-1.07)	0.00014	1.02(1-1.04)	0.037	6.5e-06	3.17e-08	---
chr6	28765346	28765346	rs9257192	6_28765346_G_C	6_28926220_G_C	6	old	rs9257408	1.07(1.01-1.14)	0.022	1.05(1.02-1.07)	0.00014	1.02(1-1.04)	0.037	6.5e-06	2.79e-08	---
chr6	28766359	28766359	rs202065757	6_28766359_C_CAT	6_28926220_G_C	6	old	rs9257408	1.07(1.01-1.14)	0.022	1.05(1.02-1.07)	0.00014	1.02(1-1.04)	0.037	6.5e-06	2.23e-08	---
chr6	28767482	28767482	rs7761321	6_28767482_C_A	6_28926220_G_C	6	old	rs9257408	1.07(1.01-1.14)	0.022	1.05(1.02-1.07)	0.00014	1.02(1-1.04)	0.037	6.5e-06	2.95e-08	---
chr6	28768267	28768267	rs7766699	6_28768267_G_A	6_28926220_G_C	6	old	rs9257408	1.07(1.01-1.14)	0.022	1.05(1.02-1.07)	0.00014	1.02(1-1.04)	0.037	6.5e-06	2.98e-08	---
chr6	28768698	28768698	rs7767099	6_28768698_C_T	6_28926220_G_C	6	old	rs9257408	1.07(1.01-1.14)	0.022	1.05(1.02-1.07)	0.00014	1.02(1-1.04)	0.037	6.5e-06	2.99e-08	---
chr6	28768932	28768932	rs9257217	6_28768932_C_T	6_28926220_G_C	6	old	rs9257408	1.07(1.01-1.14)	0.022	1.05(1.02-1.07)	0.00014	1.02(1-1.04)	0.037	6.5e-06	3.08e-08	---
chr6	28773355	28773355	rs3132373	6_28773355_G_T	6_28926220_G_C	6	old	rs9257408	1.07(1.01-1.14)	0.022	1.05(1.02-1.07)	0.00014	1.02(1-1.04)	0.037	6.5e-06	3.26e-08	---
chr6	28775564	28775564	rs3131343	6_28775564_G_A	6_28926220_G_C	6	old	rs9257408	1.07(1.01-1.14)	0.022	1.05(1.02-1.07)	0.00014	1.02(1-1.04)	0.037	6.5e-06	4.16e-08	---
chr6	28776117	28776117	rs4324798	6_28776117_G_A	6_28926220_G_C	6	old	rs9257408	1.07(1.01-1.14)	0.022	1.05(1.02-1.07)	0.00014	1.02(1-1.04)	0.037	6.5e-06	3.24e-08	---
chr6	28776317	28776317	rs9257223	6_28776317_T_C	6_28926220_G_C	6	old	rs9257408	1.07(1.01-1.14)	0.022	1.05(1.02-1.07)	0.00014	1.02(1-1.04)	0.037	6.5e-06	3.13e-08	---
chr6	28777570	28777570	rs35064234	6_28777570_T_TC	6_28926220_G_C	6	old	rs9257408	1.07(1.01-1.14)	0.022	1.05(1.02-1.07)	0.00014	1.02(1-1.04)	0.037	6.5e-06	1.53e-08	---
chr6	28778723	28778723	rs3131341	6_28778723_C_T	6_28926220_G_C	6	old	rs9257408	1.07(1.01-1.14)	0.022	1.05(1.02-1.07)	0.00014	1.02(1-1.04)	0.037	6.5e-06	4.33e-08	---
chr6	28779878	28779878	rs3131340	6_28779878_T_G	6_28926220_G_C	6	old	rs9257408	1.07(1.01-1.14)	0.022	1.05(1.02-1.07)	0.00014	1.02(1-1.04)	0.037	6.5e-06	1.42e-08	---
chr6	28782160	28782160	rs3132397	6_28782160_G_A	6_28926220_G_C	6	old	rs9257408	1.07(1.01-1.14)	0.022	1.05(1.02-1.07)	0.00014	1.02(1-1.04)	0.037	6.5e-06	3.16e-08	---
chr6	28782310	28782310	rs3132396	6_28782310_T_C	6_28926220_G_C	6	old	rs9257408	1.07(1.01-1.14)	0.022	1.05(1.02-1.07)	0.00014	1.02(1-1.04)	0.037	6.5e-06	3.21e-08	---
chr6	28787384	28787384	rs9257227	6_28787384_T_C	6_28926220_G_C	6	old	rs9257408	1.07(1.01-1.14)	0.022	1.05(1.02-1.07)	0.00014	1.02(1-1.04)	0.037	6.5e-06	3.63e-08	---
chr6	28788769	28788769	rs3135294	6_28788769_G_A	6_28926220_G_C	6	old	rs9257408	1.07(1.01-1.14)	0.022	1.05(1.02-1.07)	0.00014	1.02(1-1.04)	0.037	6.5e-06	3.68e-08	---
chr6	28792030	28792030	rs3118360	6_28792030_G_A	6_28926220_G_C	6	old	rs9257408	1.07(1.01-1.14)	0.022	1.05(1.02-1.07)	0.00014	1.02(1-1.04)	0.037	6.5e-06	9.59e-08	---
chr6	28793904	28793904	rs3118359	6_28793904_G_T	6_28926220_G_C	6	old	rs9257408	1.07(1.01-1.14)	0.022	1.05(1.02-1.07)	0.00014	1.02(1-1.04)	0.037	6.5e-06	3.58e-08	---
chr6	28793915	28793915	rs3135295	6_28793915_T_C	6_28926220_G_C	6	old	rs9257408	1.07(1.01-1.14)	0.022	1.05(1.02-1.07)	0.00014	1.02(1-1.04)	0.037	6.5e-06	3.39e-08	---
chr6	28795856	28795856	rs3135296	6_28795856_A_T	6_28926220_G_C	6	old	rs9257408	1.07(1.01-1.14)	0.022	1.05(1.02-1.07)	0.00014	1.02(1-1.04)	0.037	6.5e-06	2.53e-08	---
chr6	28799155	28799155	rs138286553	6_28799155_A_T	6_28926220_G_C	6	old	rs9257408	1.07(1.01-1.14)	0.022	1.05(1.02-1.07)	0.00014	1.02(1-1.04)	0.037	6.5e-06	2.99e-08	---
chr6	28799388	28799388	rs143989131	6_28799388_T_G	6_28926220_G_C	6	old	rs9257408	1.07(1.01-1.14)	0.022	1.05(1.02-1.07)	0.00014	1.02(1-1.04)	0.037	6.5e-06	2.98e-08	---
chr6	28801168	28801168	rs3132376	6_28801168_G_A	6_28926220_G_C	6	old	rs9257408	1.07(1.01-1.14)	0.022	1.05(1.02-1.07)	0.00014	1.02(1-1.04)	0.037	6.5e-06	2.91e-08	---
chr6	28802149	28802149	rs3118357	6_28802149_G_A	6_28926220_G_C	6	old	rs9257408	1.07(1.01-1.14)	0.022	1.05(1.02-1.07)	0.00014	1.02(1-1.04)	0.037	6.5e-06	2.77e-08	---
chr6	28803291	28803291	rs9257248	6_28803291_C_T	6_28926220_G_C	6	old	rs9257408	1.07(1.01-1.14)	0.022	1.05(1.02-1.07)	0.00014	1.02(1-1.04)	0.037	6.5e-06	3.09e-08	---
chr6	28803504	28803504	rs9257249	6_28803504_T_C	6_28926220_G_C	6	old	rs9257408	1.07(1.01-1.14)	0.022	1.05(1.02-1.07)	0.00014	1.02(1-1.04)	0.037	6.5e-06	3.08e-08	---
chr6	28803633	28803633	rs9257250	6_28803633_A_T	6_28926220_G_C	6	old	rs9257408	1.07(1.01-1.14)	0.022	1.05(1.02-1.07)	0.00014	1.02(1-1.04)	0.037	6.5e-06	3.08e-08	---
chr6	28804688	28804688	rs3135297	6_28804688_G_A	6_28926220_G_C	6	old	rs9257408	1.07(1.01-1.14)	0.022	1.05(1.02-1.07)	0.00014	1.02(1-1.04)	0.037	6.5e-06	3.05e-08	---
chr6	28806303	28806303	rs3135298	6_28806303_G_C	6_28926220_G_C	6	old	rs9257408	1.07(1.01-1.14)	0.022	1.05(1.02-1.07)	0.00014	1.02(1-1.04)	0.037	6.5e-06	3.28e-08	---
chr6	28808992	28808992	rs3132395	6_28808992_A_G	6_28926220_G_C	6	old	rs9257408	1.07(1.01-1.14)	0.022	1.05(1.02-1.07)	0.00014	1.02(1-1.04)	0.037	6.5e-06	2.84e-08	---
chr6	28809038	28809038	rs3132394	6_28809038_T_G	6_28926220_G_C	6	old	rs9257408	1.07(1.01-1.14)	0.022	1.05(1.02-1.07)	0.00014	1.02(1-1.04)	0.037	6.5e-06	2.93e-08	---
chr6	28809050	28809050	rs3135299	6_28809050_G_C	6_28926220_G_C	6	old	rs9257408	1.07(1.01-1.14)	0.022	1.05(1.02-1.07)	0.00014	1.02(1-1.04)	0.037	6.5e-06	4.46e-08	---
chr6	28809598	28809598	rs3132393	6_28809598_T_C	6_28926220_G_C	6	old	rs9257408	1.07(1.01-1.14)	0.022	1.05(1.02-1.07)	0.00014	1.02(1-1.04)	0.037	6.5e-06	2.93e-08	---
chr6	28814446	28814446	rs3131335	6_28814446_T_C	6_28926220_G_C	6	old	rs9257408	1.07(1.01-1.14)	0.022	1.05(1.02-1.07)	0.00014	1.02(1-1.04)	0.037	6.5e-06	2.85e-08	---
chr6	28817590	28817590	rs9257262	6_28817590_C_T	6_28926220_G_C	6	old	rs9257408	1.07(1.01-1.14)	0.022	1.05(1.02-1.07)	0.00014	1.02(1-1.04)	0.037	6.5e-06	2.79e-08	---
chr6	28817897	28817897	rs7760313	6_28817897_T_C	6_28926220_G_C	6	old	rs9257408	1.07(1.01-1.14)	0.022	1.05(1.02-1.07)	0.00014	1.02(1-1.04)	0.037	6.5e-06	2.79e-08	---
chr6	28819880	28819880	rs150092096	6_28819880_A_G	6_28926220_G_C	6	old	rs9257408	1.07(1.01-1.14)	0.022	1.05(1.02-1.07)	0.00014	1.02(1-1.04)	0.037	6.5e-06	2.75e-08	---
chr6	28821676	28821676	rs9257271	6_28821676_G_A	6_28926220_G_C	6	old	rs9257408	1.07(1.01-1.14)	0.022	1.05(1.02-1.07)	0.00014	1.02(1-1.04)	0.037	6.5e-06	2.72e-08	---
chr6	28821735	28821735	rs9257272	6_28821735_T_C	6_28926220_G_C	6	old	rs9257408	1.07(1.01-1.14)	0.022	1.05(1.02-1.07)	0.00014	1.02(1-1.04)	0.037	6.5e-06	2.72e-08	---
chr6	28823999	28823999	rs3132384	6_28823999_C_A	6_28926220_G_C	6	old	rs9257408	1.07(1.01-1.14)	0.022	1.05(1.02-1.07)	0.00014	1.02(1-1.04)	0.037	6.5e-06	2.74e-08	---
chr6	28824397	28824397	rs3135300	6_28824397_T_A	6_28926220_G_C	6	old	rs9257408	1.07(1.01-1.14)	0.022	1.05(1.02-1.07)	0.00014	1.02(1-1.04)	0.037	6.5e-06	3.29e-08	---
chr6	28824974	28824974	rs3132385	6_28824974_C_T	6_28926220_G_C	6	old	rs9257408	1.07(1.01-1.14)	0.022	1.05(1.02-1.07)	0.00014	1.02(1-1.04)	0.037	6.5e-06	4.08e-08	---
chr6	28825571	28825571	rs3131345	6_28825571_G_A	6_28926220_G_C	6	old	rs9257408	1.07(1.01-1.14)	0.022	1.05(1.02-1.07)	0.00014	1.02(1-1.04)	0.037	6.5e-06	2.72e-08	---
chr6	28825573	28825573	rs3132387	6_28825573_G_A	6_28926220_G_C	6	old	rs9257408	1.07(1.01-1.14)	0.022	1.05(1.02-1.07)	0.00014	1.02(1-1.04)	0.037	6.5e-06	2.72e-08	---
chr6	28827879	28827879	rs3132388	6_28827879_C_T	6_28926220_G_C	6	old	rs9257408	1.07(1.01-1.14)	0.022	1.05(1.02-1.07)	0.00014	1.02(1-1.04)	0.037	6.5e-06	3.27e-08	---
chr6	28828393	28828393	6:28828393	6_28828393_TCTAAC_T	6_28926220_G_C	6	old	rs9257408	1.07(1.01-1.14)	0.022	1.05(1.02-1.07)	0.00014	1.02(1-1.04)	0.037	6.5e-06	2.03e-08	---
chr6	28829637	28829637	rs3135302	6_28829637_G_C	6_28926220_G_C	6	old	rs9257408	1.07(1.01-1.14)	0.022	1.05(1.02-1.07)	0.00014	1.02(1-1.04)	0.037	6.5e-06	2.62e-08	---
chr6	28831021	28831021	rs3132389	6_28831021_T_G	6_28926220_G_C	6	old	rs9257408	1.07(1.01-1.14)	0.022	1.05(1.02-1.07)	0.00014	1.02(1-1.04)	0.037	6.5e-06	4.06e-08	---
chr6	28831611	28831611	rs3131336	6_28831611_C_T	6_28926220_G_C	6	old	rs9257408	1.07(1.01-1.14)	0.022	1.05(1.02-1.07)	0.00014	1.02(1-1.04)	0.037	6.5e-06	3.8e-08	---
chr6	28832788	28832788	6:28832788	6_28832788_A_G	6_28926220_G_C	6	old	rs9257408	1.07(1.01-1.14)	0.022	1.05(1.02-1.07)	0.00014	1.02(1-1.04)	0.037	6.5e-06	9.49e-08	---
chr6	28833101	28833101	6:28833101	6_28833101_T_G	6_28926220_G_C	6	old	rs9257408	1.07(1.01-1.14)	0.022	1.05(1.02-1.07)	0.00014	1.02(1-1.04)	0.037	6.5e-06	2.46e-08	---
chr6	28833143	28833143	rs138792987	6_28833143_GATTT_G	6_28926220_G_C	6	old	rs9257408	1.07(1.01-1.14)	0.022	1.05(1.02-1.07)	0.00014	1.02(1-1.04)	0.037	6.5e-06	1.9e-08	---
chr6	28837343	28837343	rs34592554	6_28837343_AC_A	6_28926220_G_C	6	old	rs9257408	1.07(1.01-1.14)	0.022	1.05(1.02-1.07)	0.00014	1.02(1-1.04)	0.037	6.5e-06	1.96e-08	---
chr6	28837437	28837437	rs3131093	6_28837437_C_T	6_28926220_G_C	6	old	rs9257408	1.07(1.01-1.14)	0.022	1.05(1.02-1.07)	0.00014	1.02(1-1.04)	0.037	6.5e-06	2.46e-08	---
chr6	28837805	28837805	rs3132391	6_28837805_G_A	6_28926220_G_C	6	old	rs9257408	1.07(1.01-1.14)	0.022	1.05(1.02-1.07)	0.00014	1.02(1-1.04)	0.037	6.5e-06	2.54e-08	---
chr6	28838629	28838629	rs3132392	6_28838629_T_C	6_28926220_G_C	6	old	rs9257408	1.07(1.01-1.14)	0.022	1.05(1.02-1.07)	0.00014	1.02(1-1.04)	0.037	6.5e-06	2.54e-08	---
chr6	28839353	28839353	rs3131094	6_28839353_C_A	6_28926220_G_C	6	old	rs9257408	1.07(1.01-1.14)	0.022	1.05(1.02-1.07)	0.00014	1.02(1-1.04)	0.037	6.5e-06	2.47e-08	---
chr6	28839403	28839403	rs3135304	6_28839403_G_A	6_28926220_G_C	6	old	rs9257408	1.07(1.01-1.14)	0.022	1.05(1.02-1.07)	0.00014	1.02(1-1.04)	0.037	6.5e-06	2.47e-08	---
chr6	28839529	28839529	rs3118367	6_28839529_T_C	6_28926220_G_C	6	old	rs9257408	1.07(1.01-1.14)	0.022	1.05(1.02-1.07)	0.00014	1.02(1-1.04)	0.037	6.5e-06	2.52e-08	---
chr6	28839709	28839709	rs3135305	6_28839709_A_G	6_28926220_G_C	6	old	rs9257408	1.07(1.01-1.14)	0.022	1.05(1.02-1.07)	0.00014	1.02(1-1.04)	0.037	6.5e-06	3.01e-08	---
chr6	28839798	28839798	rs3135306	6_28839798_G_A	6_28926220_G_C	6	old	rs9257408	1.07(1.01-1.14)	0.022	1.05(1.02-1.07)	0.00014	1.02(1-1.04)	0.037	6.5e-06	2.47e-08	---
chr6	28839899	28839899	rs3118366	6_28839899_T_C	6_28926220_G_C	6	old	rs9257408	1.07(1.01-1.14)	0.022	1.05(1.02-1.07)	0.00014	1.02(1-1.04)	0.037	6.5e-06	2.05e-08	---
chr6	28839908	28839908	rs3118365	6_28839908_G_A	6_28926220_G_C	6	old	rs9257408	1.07(1.01-1.14)	0.022	1.05(1.02-1.07)	0.00014	1.02(1-1.04)	0.037	6.5e-06	3.34e-08	---
chr6	28840184	28840184	rs9257307	6_28840184_G_A	6_28926220_G_C	6	old	rs9257408	1.07(1.01-1.14)	0.022	1.05(1.02-1.07)	0.00014	1.02(1-1.04)	0.037	6.5e-06	3.18e-08	---
chr6	28846924	28846924	rs35608874	6_28846924_CT_C	6_28926220_G_C	6	old	rs9257408	1.07(1.01-1.14)	0.022	1.05(1.02-1.07)	0.00014	1.02(1-1.04)	0.037	6.5e-06	1.83e-08	---
chr6	28847384	28847384	rs3135307	6_28847384_C_T	6_28926220_G_C	6	old	rs9257408	1.07(1.01-1.14)	0.022	1.05(1.02-1.07)	0.00014	1.02(1-1.04)	0.037	6.5e-06	2.25e-08	---
chr6	28851572	28851572	rs3131095	6_28851572_T_C	6_28926220_G_C	6	old	rs9257408	1.07(1.01-1.14)	0.022	1.05(1.02-1.07)	0.00014	1.02(1-1.04)	0.037	6.5e-06	4.68e-08	---
chr6	28852156	28852156	rs3135308	6_28852156_C_T	6_28926220_G_C	6	old	rs9257408	1.07(1.01-1.14)	0.022	1.05(1.02-1.07)	0.00014	1.02(1-1.04)	0.037	6.5e-06	3.48e-08	---
chr6	28852451	28852451	rs3131096	6_28852451_T_C	6_28926220_G_C	6	old	rs9257408	1.07(1.01-1.14)	0.022	1.05(1.02-1.07)	0.00014	1.02(1-1.04)	0.037	6.5e-06	4.66e-08	---
chr6	28852878	28852878	rs3118364	6_28852878_G_A	6_28926220_G_C	6	old	rs9257408	1.07(1.01-1.14)	0.022	1.05(1.02-1.07)	0.00014	1.02(1-1.04)	0.037	6.5e-06	4.65e-08	---
chr6	28853197	28853197	rs3131097	6_28853197_A_G	6_28926220_G_C	6	old	rs9257408	1.07(1.01-1.14)	0.022	1.05(1.02-1.07)	0.00014	1.02(1-1.04)	0.037	6.5e-06	4.55e-08	---
chr6	28855805	28855805	rs3135309	6_28855805_A_C	6_28926220_G_C	6	old	rs9257408	1.07(1.01-1.14)	0.022	1.05(1.02-1.07)	0.00014	1.02(1-1.04)	0.037	6.5e-06	4.49e-08	---
chr6	28856689	28856689	rs3135310	6_28856689_A_G	6_28926220_G_C	6	old	rs9257408	1.07(1.01-1.14)	0.022	1.05(1.02-1.07)	0.00014	1.02(1-1.04)	0.037	6.5e-06	4.51e-08	---
chr6	28856740	28856740	rs3135311	6_28856740_A_C	6_28926220_G_C	6	old	rs9257408	1.07(1.01-1.14)	0.022	1.05(1.02-1.07)	0.00014	1.02(1-1.04)	0.037	6.5e-06	4.5e-08	---
chr6	28856889	28856889	rs3135312	6_28856889_T_A	6_28926220_G_C	6	old	rs9257408	1.07(1.01-1.14)	0.022	1.05(1.02-1.07)	0.00014	1.02(1-1.04)	0.037	6.5e-06	4.5e-08	---
chr6	28857630	28857630	rs3135313	6_28857630_G_C	6_28926220_G_C	6	old	rs9257408	1.07(1.01-1.14)	0.022	1.05(1.02-1.07)	0.00014	1.02(1-1.04)	0.037	6.5e-06	4.51e-08	---
chr6	28862497	28862497	rs9257331	6_28862497_G_A	6_28926220_G_C	6	old	rs9257408	1.07(1.01-1.14)	0.022	1.05(1.02-1.07)	0.00014	1.02(1-1.04)	0.037	6.5e-06	5.15e-08	---
chr6	28864849	28864849	rs3135316	6_28864849_A_G	6_28926220_G_C	6	old	rs9257408	1.07(1.01-1.14)	0.022	1.05(1.02-1.07)	0.00014	1.02(1-1.04)	0.037	6.5e-06	3.64e-08	---
chr6	28865209	28865209	rs9280503	6_28865209_T_TA	6_28926220_G_C	6	old	rs9257408	1.07(1.01-1.14)	0.022	1.05(1.02-1.07)	0.00014	1.02(1-1.04)	0.037	6.5e-06	3.97e-08	---
chr6	28866528	28866528	rs3130838	6_28866528_T_C	6_28926220_G_C	6	old	rs9257408	1.07(1.01-1.14)	0.022	1.05(1.02-1.07)	0.00014	1.02(1-1.04)	0.037	6.5e-06	4.5e-08	---
chr6	28868494	28868494	rs3132374	6_28868494_C_G	6_28926220_G_C	6	old	rs9257408	1.07(1.01-1.14)	0.022	1.05(1.02-1.07)	0.00014	1.02(1-1.04)	0.037	6.5e-06	4.84e-08	---
chr6	28875501	28875501	rs3118363	6_28875501_T_C	6_28926220_G_C	6	old	rs9257408	1.07(1.01-1.14)	0.022	1.05(1.02-1.07)	0.00014	1.02(1-1.04)	0.037	6.5e-06	4.35e-08	---
chr6	28877247	28877247	rs3135293	6_28877247_T_C	6_28926220_G_C	6	old	rs9257408	1.07(1.01-1.14)	0.022	1.05(1.02-1.07)	0.00014	1.02(1-1.04)	0.037	6.5e-06	4.27e-08	---
chr6	28883296	28883296	rs3132382	6_28883296_G_A	6_28926220_G_C	6	old	rs9257408	1.07(1.01-1.14)	0.022	1.05(1.02-1.07)	0.00014	1.02(1-1.04)	0.037	6.5e-06	4.27e-08	---
chr6	28885863	28885863	rs3131101	6_28885863_A_G	6_28926220_G_C	6	old	rs9257408	1.07(1.01-1.14)	0.022	1.05(1.02-1.07)	0.00014	1.02(1-1.04)	0.037	6.5e-06	4.15e-08	---
chr6	28885865	28885865	rs3132378	6_28885865_A_G	6_28926220_G_C	6	old	rs9257408	1.07(1.01-1.14)	0.022	1.05(1.02-1.07)	0.00014	1.02(1-1.04)	0.037	6.5e-06	4.14e-08	---
[truncated: 2,453 more rows]

## Sheet: All_sig_and_nearsig_BCa
#chr	start	stop	snp	sig	sig_cat	crv_reg_chr	crv_reg_start	crv_reg_stop	name_crv_region	crv_in_region	chr_num
chr1	7917076	7917076	rs707475:7917076:G:A	1.29e-07	---	na	na	na	none	na	1
chr1	7923038	7923038	rs7525916:7923038:T:G	7.98e-06	---	na	na	na	none	na	1
chr1	7969507	7969507	rs113965662:7969507:G:A	6.4e-06	---	na	na	na	none	na	1
chr1	7969870	7969870	rs112853802:7969870:C:T	6.88e-06	---	na	na	na	none	na	1
chr1	7982816	7982816	rs17229081:7982816:G:A	3.44e-06	---	na	na	na	none	na	1
chr1	7989022	7989022	rs9658012:7989022:C:T	3.87e-06	---	na	na	na	none	na	1
chr1	7994420	7994420	rs2493214:7994420:A:G	9.58e-06	---	na	na	na	none	na	1
chr1	7997183	7997183	rs7545687:7997183:G:A	4.29e-06	---	na	na	na	none	na	1
chr1	8021740	8021740	rs17523802:8021740:G:A	4.33e-06	---	na	na	na	none	na	1
chr1	8021910	8021910	rs200968609:8021910:GGTGCTGGACGGTGTCCCT:G	5.86e-06	---	na	na	na	none	na	1
chr1	8021973	8021973	rs35675666:8021973:G:T	4.81e-06	---	na	na	na	none	na	1
chr1	8022197	8022197	rs3766606:8022197:G:T	4.74e-06	---	na	na	na	none	na	1
chr1	8022772	8022772	rs144768319:8022772:CAG:C	4.54e-06	---	na	na	na	none	na	1
chr1	8023586	8023586	rs34157438:8023586:C:T	3.47e-06	---	na	na	na	none	na	1
chr1	8025275	8025275	rs7517357:8025275:C:T	3.74e-06	---	na	na	na	none	na	1
chr1	8027830	8027830	rs12740409:8027830:A:C	6.12e-06	---	na	na	na	none	na	1
chr1	8028930	8028930	rs34124834:8028930:T:G	7.2e-06	---	na	na	na	none	na	1
chr1	8029494	8029494	rs2641116:8029494:T:G	4.81e-06	---	na	na	na	none	na	1
chr1	8032921	8032921	rs367481:8032921:A:G	4.34e-06	---	na	na	na	none	na	1
chr1	8033722	8033722	rs34178035:8033722:CA:C	4.19e-06	---	na	na	na	none	na	1
chr1	8033837	8033837	rs12563704:8033837:G:A	3.64e-06	---	na	na	na	none	na	1
chr1	8038177	8038177	rs12750531:8038177:C:T	5.23e-06	---	na	na	na	none	na	1
chr1	8041290	8041290	rs67717282:8041290:C:T	5.3e-06	---	na	na	na	none	na	1
chr1	8042402	8042402	rs161800:8042402:A:T	5.36e-06	---	na	na	na	none	na	1
chr1	8042826	8042826	rs161802:8042826:G:T	4.4e-06	---	na	na	na	none	na	1
chr1	8046378	8046378	rs225120:8046378:C:T	5.74e-06	---	na	na	na	none	na	1
chr1	8046672	8046672	rs12727642:8046672:C:A	5.19e-06	---	na	na	na	none	na	1
chr1	8047676	8047676	rs60094536:8047676:C:T	4.88e-06	---	na	na	na	none	na	1
chr1	8051241	8051241	rs36016881:8051241:A:G	4.47e-06	---	na	na	na	none	na	1
chr1	8053135	8053135	rs17367289:8053135:A:G	4.83e-06	---	na	na	na	none	na	1
chr1	8059336	8059336	rs140249833:8059336:C:CA	5.6e-06	---	na	na	na	none	na	1
chr1	8060584	8060584	rs76211404:8060584:TAATTTGGCTGAGTAGAG:T	3.85e-06	---	na	na	na	none	na	1
chr1	8060699	8060699	rs111875777:8060699:C:A	2.99e-06	---	na	na	na	none	na	1
chr1	8065712	8065712	rs34768550:8065712:CT:C	2.88e-06	---	na	na	na	none	na	1
chr1	8071818	8071818	rs3215549:8071818:GAA:G	6.5e-06	---	na	na	na	none	na	1
chr1	8074872	8074872	rs397349:8074872:A:C	4.42e-06	---	na	na	na	none	na	1
chr1	8075934	8075934	rs2294889:8075934:A:G	6.13e-06	---	na	na	na	none	na	1
chr1	8078569	8078569	rs12735338:8078569:T:C	5.92e-06	---	na	na	na	none	na	1
chr1	8079301	8079301	rs10489450:8079301:C:T	5.88e-06	---	na	na	na	none	na	1
chr1	8080712	8080712	rs419683:8080712:G:C	6.42e-06	---	na	na	na	none	na	1
chr1	8080745	8080745	rs404381:8080745:C:T	4.61e-06	---	na	na	na	none	na	1
chr1	8080787	8080787	rs419390:8080787:T:C	4.61e-06	---	na	na	na	none	na	1
chr1	8080807	8080807	rs441467:8080807:A:G	4.49e-06	---	na	na	na	none	na	1
chr1	8080895	8080895	rs441597:8080895:A:G	6.32e-06	---	na	na	na	none	na	1
chr1	8084355	8084355	rs28624:8084355:A:C	4.26e-06	---	na	na	na	none	na	1
chr1	8094978	8094978	rs12745223:8094978:C:T	3.54e-06	---	na	na	na	none	na	1
chr1	8095486	8095486	rs225131:8095486:T:C	2.99e-06	---	na	na	na	none	na	1
chr1	8095500	8095500	rs225132:8095500:T:G	2.76e-06	---	na	na	na	none	na	1
chr1	8097145	8097145	rs7522911:8097145:C:T	3.82e-06	---	na	na	na	none	na	1
chr1	8099553	8099553	rs35565273:8099553:GT:G	3.37e-06	---	na	na	na	none	na	1
chr1	8100173	8100173	rs6577459:8100173:G:T	4.15e-06	---	na	na	na	none	na	1
chr1	8100451	8100451	rs1883679:8100451:T:G	4.14e-06	---	na	na	na	none	na	1
chr1	8106201	8106201	rs12757968:8106201:A:G	4.12e-06	---	na	na	na	none	na	1
chr1	8109836	8109836	rs34823376:8109836:G:A	4.68e-06	---	na	na	na	none	na	1
chr1	8111839	8111839	rs2050198:8111839:T:G	3.75e-06	---	na	na	na	none	na	1
chr1	8114319	8114319	rs12753070:8114319:C:G	4.44e-06	---	na	na	na	none	na	1
chr1	8119251	8119251	rs4908724:8119251:G:T	6.35e-06	---	na	na	na	none	na	1
chr1	8125990	8125990	rs71639211:8125990:C:T	4.25e-06	---	na	na	na	none	na	1
chr1	8129507	8129507	rs12748993:8129507:A:G	4.09e-06	---	na	na	na	none	na	1
chr1	8130254	8130254	rs34501555:8130254:T:C	6.15e-06	---	na	na	na	none	na	1
chr1	8132462	8132462	rs12730860:8132462:T:C	4.18e-06	---	na	na	na	none	na	1
chr1	8133352	8133352	rs7539255:8133352:T:C	4.8e-06	---	na	na	na	none	na	1
chr1	8136016	8136016	rs12736494:8136016:G:A	5.68e-06	---	na	na	na	none	na	1
chr1	8165667	8165667	rs7545745:8165667:T:A	9.23e-06	+++	na	na	na	none	na	1
chr1	8168261	8168261	rs10746475:8168261:T:A	9.12e-06	+++	na	na	na	none	na	1
chr1	10485235	10485235	rs490037:10485235:G:A	3.82e-06	---	chr1	9538951	11637709	brc2017_riskregion__chr1_9538951_50	50	1
chr1	10485342	10485342	rs490960:10485342:G:A	2.76e-06	---	chr1	9538951	11637709	brc2017_riskregion__chr1_9538951_50	50	1
chr1	10485669	10485669	rs515423:10485669:G:A	1.02e-06	---	chr1	9538951	11637709	brc2017_riskregion__chr1_9538951_50	50	1
chr1	10490539	10490539	rs661256:10490539:G:C	1.96e-06	---	chr1	9538951	11637709	brc2017_riskregion__chr1_9538951_50	50	1
chr1	10490550	10490550	rs661272:10490550:G:C	1.96e-06	---	chr1	9538951	11637709	brc2017_riskregion__chr1_9538951_50	50	1
chr1	10491209	10491209	rs484416:10491209:G:A	8.21e-07	---	chr1	9538951	11637709	brc2017_riskregion__chr1_9538951_50	50	1
chr1	10491895	10491895	rs5772409:10491895:A:AGCGAGACTCC	8.68e-06	---	chr1	9538951	11637709	brc2017_riskregion__chr1_9538951_50	50	1
chr1	10493415	10493415	rs597441:10493415:C:T	9.9e-06	---	chr1	9538951	11637709	brc2017_riskregion__chr1_9538951_50	50	1
chr1	10495110	10495110	rs2847336:10495110:C:T	8.6e-07	---	chr1	9538951	11637709	brc2017_riskregion__chr1_9538951_50	50	1
chr1	10496038	10496038	rs141993546:10496038:AT:A	1.7e-06	---	chr1	9538951	11637709	brc2017_riskregion__chr1_9538951_50	50	1
chr1	10497911	10497911	rs1760666:10497911:G:A	7.7e-06	---	chr1	9538951	11637709	brc2017_riskregion__chr1_9538951_50	50	1
chr1	10497915	10497915	rs1750349:10497915:A:G	7.71e-06	---	chr1	9538951	11637709	brc2017_riskregion__chr1_9538951_50	50	1
chr1	10498453	10498453	rs676995:10498453:C:T	8.45e-07	---	chr1	9538951	11637709	brc2017_riskregion__chr1_9538951_50	50	1
chr1	10502307	10502307	rs33919161:10502307:AT:A	1.62e-06	+++	chr1	9538951	11637709	brc2017_riskregion__chr1_9538951_50	50	1
chr1	10502710	10502710	rs2847337:10502710:A:G	9.75e-07	+++	chr1	9538951	11637709	brc2017_riskregion__chr1_9538951_50	50	1
chr1	10503000	10503000	rs10864455:10503000:A:G	1.01e-06	+++	chr1	9538951	11637709	brc2017_riskregion__chr1_9538951_50	50	1
chr1	10503641	10503641	rs10864456:10503641:G:A	1.02e-06	+++	chr1	9538951	11637709	brc2017_riskregion__chr1_9538951_50	50	1
chr1	10506518	10506518	rs4285702:10506518:C:T	1.54e-06	+++	chr1	9538951	11637709	brc2017_riskregion__chr1_9538951_50	50	1
chr1	10507236	10507236	rs1307489:10507236:A:G	1.1e-06	+++	chr1	9538951	11637709	brc2017_riskregion__chr1_9538951_50	50	1
chr1	10508023	10508023	rs61450086:10508023:T:TGA	4.98e-06	+++	chr1	9538951	11637709	brc2017_riskregion__chr1_9538951_50	50	1
chr1	10508679	10508679	rs1307490:10508679:T:C	1.05e-06	+++	chr1	9538951	11637709	brc2017_riskregion__chr1_9538951_50	50	1
chr1	10509409	10509409	rs1307493:10509409:C:T	1.41e-06	+++	chr1	9538951	11637709	brc2017_riskregion__chr1_9538951_50	50	1
chr1	10509703	10509703	rs1307494:10509703:C:T	1.21e-06	+++	chr1	9538951	11637709	brc2017_riskregion__chr1_9538951_50	50	1
chr1	10510682	10510682	rs1308520:10510682:A:G	1.29e-06	+++	chr1	9538951	11637709	brc2017_riskregion__chr1_9538951_50	50	1
chr1	10511589	10511589	rs666103:10511589:T:C	2.23e-09	+++	chr1	9538951	11637709	brc2017_riskregion__chr1_9538951_50	50	1
chr1	10512056	10512056	rs1307497:10512056:T:C	6.64e-07	+++	chr1	9538951	11637709	brc2017_riskregion__chr1_9538951_50	50	1
chr1	10512509	10512509	rs6540931:10512509:T:C	1.03e-06	+++	chr1	9538951	11637709	brc2017_riskregion__chr1_9538951_50	50	1
chr1	10515414	10515414	rs2483686:10515414:T:C	6.41e-07	+++	chr1	9538951	11637709	brc2017_riskregion__chr1_9538951_50	50	1
chr1	10516393	10516393	rs944973:10516393:C:G	7.93e-07	+++	chr1	9538951	11637709	brc2017_riskregion__chr1_9538951_50	50	1
chr1	10517944	10517944	rs55801511:10517944:CTG:C	1.94e-06	+++	chr1	9538951	11637709	brc2017_riskregion__chr1_9538951_50	50	1
chr1	10518596	10518596	rs3927586:10518596:C:T	6.87e-07	+++	chr1	9538951	11637709	brc2017_riskregion__chr1_9538951_50	50	1
chr1	10519090	10519090	rs7537164:10519090:C:T	1.01e-06	+++	chr1	9538951	11637709	brc2017_riskregion__chr1_9538951_50	50	1
chr1	10520587	10520587	rs58464882:10520587:CTT:C	3.69e-06	+++	chr1	9538951	11637709	brc2017_riskregion__chr1_9538951_50	50	1
chr1	10522276	10522276	rs34372628:10522276:C:T	1.35e-08	---	chr1	9538951	11637709	brc2017_riskregion__chr1_9538951_50	50	1
chr1	10522289	10522289	rs12065251:10522289:C:T	2.77e-08	---	chr1	9538951	11637709	brc2017_riskregion__chr1_9538951_50	50	1
chr1	10523930	10523930	rs12729844:10523930:C:T	1.35e-08	---	chr1	9538951	11637709	brc2017_riskregion__chr1_9538951_50	50	1
chr1	10524432	10524432	rs2027087:10524432:A:T	1.25e-08	---	chr1	9538951	11637709	brc2017_riskregion__chr1_9538951_50	50	1
chr1	10524444	10524444	rs1203122:10524444:C:T	6.15e-06	+++	chr1	9538951	11637709	brc2017_riskregion__chr1_9538951_50	50	1
chr1	10524467	10524467	rs6667629:10524467:T:C	1.63e-08	---	chr1	9538951	11637709	brc2017_riskregion__chr1_9538951_50	50	1
chr1	10525459	10525459	rs34389737:10525459:A:AT	2.82e-08	---	chr1	9538951	11637709	brc2017_riskregion__chr1_9538951_50	50	1
chr1	10525841	10525841	rs34132699:10525841:T:C	2.61e-08	---	chr1	9538951	11637709	brc2017_riskregion__chr1_9538951_50	50	1
chr1	10525860	10525860	rs1188530:10525860:T:C	1.89e-09	+++	chr1	9538951	11637709	brc2017_riskregion__chr1_9538951_50	50	1
chr1	10525914	10525914	rs1188529:10525914:A:T	6.29e-15	+++	chr1	9538951	11637709	brc2017_riskregion__chr1_9538951_50	50	1
chr1	10526144	10526144	rs672606:10526144:G:A	1.27e-06	+++	chr1	9538951	11637709	brc2017_riskregion__chr1_9538951_50	50	1
chr1	10529194	10529194	rs2781233:10529194:T:C	1.18e-06	+++	chr1	9538951	11637709	brc2017_riskregion__chr1_9538951_50	50	1
chr1	10529896	10529896	rs35502618:10529896:CT:C	1.38e-15	+++	chr1	9538951	11637709	brc2017_riskregion__chr1_9538951_50	50	1
chr1	10537090	10537090	rs684016:10537090:C:A	6.66e-07	+++	chr1	9538951	11637709	brc2017_riskregion__chr1_9538951_50	50	1
chr1	10537437	10537437	rs685746:10537437:C:G	1.18e-15	+++	chr1	9538951	11637709	brc2017_riskregion__chr1_9538951_50	50	1
chr1	10538951	10538951	rs1152739:10538951:T:C	1.95e-18	+++	chr1	9538951	11637709	brc2017_riskregion__chr1_9538951_50	50	1
chr1	10539543	10539543	rs607941:10539543:C:T	2.02e-18	+++	chr1	9538951	11637709	brc2017_riskregion__chr1_9538951_50	50	1
chr1	10541293	10541293	rs10864458:10541293:C:T	9.2e-16	+++	chr1	9538951	11637709	brc2017_riskregion__chr1_9538951_50	50	1
chr1	10541880	10541880	rs34612970:10541880:CT:C	6.86e-16	+++	chr1	9538951	11637709	brc2017_riskregion__chr1_9538951_50	50	1
chr1	10542584	10542584	rs12124486:10542584:G:A	4.19e-09	---	chr1	9538951	11637709	brc2017_riskregion__chr1_9538951_50	50	1
chr1	10542714	10542714	rs652771:10542714:G:A	2.1e-18	+++	chr1	9538951	11637709	brc2017_riskregion__chr1_9538951_50	50	1
chr1	10543817	10543817	rs34647980:10543817:A:AC	5.9e-17	+++	chr1	9538951	11637709	brc2017_riskregion__chr1_9538951_50	50	1
chr1	10543988	10543988	rs33999128:10543988:A:AATTC	4.47e-06	+++	chr1	9538951	11637709	brc2017_riskregion__chr1_9538951_50	50	1
chr1	10544388	10544388	rs2781232:10544388:T:C	1.17e-18	+++	chr1	9538951	11637709	brc2017_riskregion__chr1_9538951_50	50	1
chr1	10544547	10544547	rs668805:10544547:G:A	2.26e-18	+++	chr1	9538951	11637709	brc2017_riskregion__chr1_9538951_50	50	1
chr1	10544725	10544725	rs669701:10544725:A:G	2.02e-18	+++	chr1	9538951	11637709	brc2017_riskregion__chr1_9538951_50	50	1
chr1	10545590	10545590	rs587916:10545590:G:A	1.39e-18	+++	chr1	9538951	11637709	brc2017_riskregion__chr1_9538951_50	50	1
chr1	10547263	10547263	rs6540933:10547263:C:T	1.2e-18	+++	chr1	9538951	11637709	brc2017_riskregion__chr1_9538951_50	50	1
chr1	10547687	10547687	rs1188528:10547687:G:A	3.73e-18	+++	chr1	9538951	11637709	brc2017_riskregion__chr1_9538951_50	50	1
chr1	10549628	10549628	rs585870:10549628:C:A	1.75e-18	+++	chr1	9538951	11637709	brc2017_riskregion__chr1_9538951_50	50	1
chr1	10549848	10549848	rs1188526:10549848:G:C	7.2e-19	+++	chr1	9538951	11637709	brc2017_riskregion__chr1_9538951_50	50	1
chr1	10550877	10550877	rs1188525:10550877:A:G	5.73e-19	+++	chr1	9538951	11637709	brc2017_riskregion__chr1_9538951_50	50	1
chr1	10551763	10551763	rs657244:10551763:A:G	1.03e-18	+++	chr1	9538951	11637709	brc2017_riskregion__chr1_9538951_50	50	1
chr1	10554505	10554505	rs597438:10554505:A:G	5.36e-19	+++	chr1	9538951	11637709	brc2017_riskregion__chr1_9538951_50	50	1
chr1	10554709	10554709	rs596537:10554709:G:T	9.78e-19	+++	chr1	9538951	11637709	brc2017_riskregion__chr1_9538951_50	50	1
chr1	10554794	10554794	rs620405:10554794:T:C	7.79e-19	+++	chr1	9538951	11637709	brc2017_riskregion__chr1_9538951_50	50	1
chr1	10555257	10555257	rs622623:10555257:C:T	1.03e-18	+++	chr1	9538951	11637709	brc2017_riskregion__chr1_9538951_50	50	1
chr1	10556097	10556097	rs636291:10556097:G:A	2.76e-16	+++	chr1	9538951	11637709	brc2017_riskregion__chr1_9538951_50	50	1
chr1	10556447	10556447	rs648324:10556447:G:T	4.41e-19	+++	chr1	9538951	11637709	brc2017_riskregion__chr1_9538951_50	50	1
chr1	10556485	10556485	rs648399:10556485:T:C	3.48e-19	+++	chr1	9538951	11637709	brc2017_riskregion__chr1_9538951_50	50	1
chr1	10557251	10557251	rs662064:10557251:T:C	5.52e-19	+++	chr1	9538951	11637709	brc2017_riskregion__chr1_9538951_50	50	1
chr1	10557544	10557544	rs660725:10557544:A:G	3.95e-19	+++	chr1	9538951	11637709	brc2017_riskregion__chr1_9538951_50	50	1
chr1	10558210	10558210	rs647281:10558210:G:A	6.92e-10	---	chr1	9538951	11637709	brc2017_riskregion__chr1_9538951_50	50	1
chr1	10559598	10559598	rs585406:10559598:C:T	3.55e-06	+++	chr1	9538951	11637709	brc2017_riskregion__chr1_9538951_50	50	1
chr1	10560214	10560214	rs34611625:10560214:CTG:C	6.58e-18	+++	chr1	9538951	11637709	brc2017_riskregion__chr1_9538951_50	50	1
chr1	10560988	10560988	rs74810178:10560988:A:G	7.9e-06	+++	chr1	9538951	11637709	brc2017_riskregion__chr1_9538951_50	50	1
chr1	10561282	10561282	rs589400:10561282:A:G	8.32e-19	---	chr1	9538951	11637709	brc2017_riskregion__chr1_9538951_50	50	1
chr1	10561347	10561347	rs71583875:10561347:G:GTTTATT	1.05e-15	+++	chr1	9538951	11637709	brc2017_riskregion__chr1_9538951_50	50	1
chr1	10561559	10561559	rs58975800:10561559:C:T	4.63e-06	+++	chr1	9538951	11637709	brc2017_riskregion__chr1_9538951_50	50	1
chr1	10561604	10561604	rs6658216:10561604:C:T	1.48e-15	+++	chr1	9538951	11637709	brc2017_riskregion__chr1_9538951_50	50	1
chr1	10561923	10561923	rs1632108:10561923:C:T	1.2e-18	---	chr1	9538951	11637709	brc2017_riskregion__chr1_9538951_50	50	1
chr1	10561954	10561954	rs683864:10561954:T:C	1.19e-18	---	chr1	9538951	11637709	brc2017_riskregion__chr1_9538951_50	50	1
chr1	10562163	10562163	rs76282123:10562163:C:T	7.37e-06	+++	chr1	9538951	11637709	brc2017_riskregion__chr1_9538951_50	50	1
chr1	10563364	10563364	rs202087283:10563364:G:A	2e-18	---	chr1	9538951	11637709	brc2017_riskregion__chr1_9538951_50	50	1
chr1	10563492	10563492	rs2506901:10563492:A:G	1.34e-18	---	chr1	9538951	11637709	brc2017_riskregion__chr1_9538951_50	50	1
chr1	10563609	10563609	rs10864459:10563609:A:G	2.98e-16	+++	chr1	9538951	11637709	brc2017_riskregion__chr1_9538951_50	50	1
chr1	10563671	10563671	rs10864460:10563671:G:C	2.44e-13	+++	chr1	9538951	11637709	brc2017_riskregion__chr1_9538951_50	50	1
chr1	10563681	10563681	rs2506902:10563681:C:T	2.03e-15	---	chr1	9538951	11637709	brc2017_riskregion__chr1_9538951_50	50	1
chr1	10563717	10563717	rs2781230:10563717:G:A	1.83e-15	---	chr1	9538951	11637709	brc2017_riskregion__chr1_9538951_50	50	1
chr1	10564675	10564675	rs2847344:10564675:G:A	3.94e-19	+++	chr1	9538951	11637709	brc2017_riskregion__chr1_9538951_50	50	1
chr1	10564774	10564774	rs371928438:10564774:TTTTCC:T	5.32e-06	+++	chr1	9538951	11637709	brc2017_riskregion__chr1_9538951_50	50	1
chr1	10565343	10565343	rs61192982:10565343:C:T	2.67e-06	+++	chr1	9538951	11637709	brc2017_riskregion__chr1_9538951_50	50	1
chr1	10565372	10565372	rs2480787:10565372:G:A	2.95e-07	---	chr1	9538951	11637709	brc2017_riskregion__chr1_9538951_50	50	1
chr1	10565488	10565488	rs1755594:10565488:C:T	1.26e-12	+++	chr1	9538951	11637709	brc2017_riskregion__chr1_9538951_50	50	1
chr1	10565741	10565741	rs34387707:10565741:A:AT	7.47e-14	+++	chr1	9538951	11637709	brc2017_riskregion__chr1_9538951_50	50	1
chr1	10566095	10566095	rs2506878:10566095:C:A	1.78e-07	---	chr1	9538951	11637709	brc2017_riskregion__chr1_9538951_50	50	1
chr1	10566215	10566215	rs616488:10566215:A:G	5.03e-20	---	chr1	9538951	11637709	brc2017_riskregion__chr1_9538951_50	50	1
chr1	10566272	10566272	rs616402:10566272:C:T	1.48e-19	---	chr1	9538951	11637709	brc2017_riskregion__chr1_9538951_50	50	1
chr1	10566522	10566522	rs617728:10566522:C:T	1.17e-19	---	chr1	9538951	11637709	brc2017_riskregion__chr1_9538951_50	50	1
chr1	10567058	10567058	rs602601:10567058:C:T	2.88e-07	+++	chr1	9538951	11637709	brc2017_riskregion__chr1_9538951_50	50	1
chr1	10567122	10567122	rs604814:10567122:G:A	2.87e-07	+++	chr1	9538951	11637709	brc2017_riskregion__chr1_9538951_50	50	1
chr1	10567208	10567208	rs604369:10567208:C:A	6.17e-06	+++	chr1	9538951	11637709	brc2017_riskregion__chr1_9538951_50	50	1
chr1	10567711	10567711	rs589151:10567711:C:T	4.28e-06	+++	chr1	9538951	11637709	brc2017_riskregion__chr1_9538951_50	50	1
chr1	10568277	10568277	rs2506880:10568277:T:G	2.25e-19	---	chr1	9538951	11637709	brc2017_riskregion__chr1_9538951_50	50	1
chr1	10569000	10569000	rs60354536:10569000:C:CT	4.98e-18	---	chr1	9538951	11637709	brc2017_riskregion__chr1_9538951_50	50	1
chr1	10569258	10569258	rs2480785:10569258:G:A	7.87e-20	---	chr1	9538951	11637709	brc2017_riskregion__chr1_9538951_50	50	1
chr1	10570721	10570721	rs2480784:10570721:G:A	4.81e-11	---	chr1	9538951	11637709	brc2017_riskregion__chr1_9538951_50	50	1
chr1	10572967	10572967	rs12129512:10572967:G:T	8.7e-10	---	chr1	9538951	11637709	brc2017_riskregion__chr1_9538951_50	50	1
chr1	10573867	10573867	rs2274985:10573867:G:A	4.07e-06	+++	chr1	9538951	11637709	brc2017_riskregion__chr1_9538951_50	50	1
chr1	10574185	10574185	rs3215946:10574185:GA:G	9.32e-07	+++	chr1	9538951	11637709	brc2017_riskregion__chr1_9538951_50	50	1
chr1	10577276	10577276	rs5005737:10577276:G:C	4.03e-06	+++	chr1	9538951	11637709	brc2017_riskregion__chr1_9538951_50	50	1
chr1	10577740	10577740	rs11121581:10577740:A:G	4.82e-06	+++	chr1	9538951	11637709	brc2017_riskregion__chr1_9538951_50	50	1
chr1	10578606	10578606	rs7419116:10578606:G:A	4.65e-07	+++	chr1	9538951	11637709	brc2017_riskregion__chr1_9538951_50	50	1
chr1	10578791	10578791	rs11584327:10578791:T:C	4.84e-06	+++	chr1	9538951	11637709	brc2017_riskregion__chr1_9538951_50	50	1
chr1	10579545	10579545	rs1411402:10579545:G:T	9.8e-20	---	chr1	9538951	11637709	brc2017_riskregion__chr1_9538951_50	50	1
chr1	10580275	10580275	rs10779737:10580275:C:G	4.47e-07	+++	chr1	9538951	11637709	brc2017_riskregion__chr1_9538951_50	50	1
chr1	10580891	10580891	rs2483677:10580891:C:T	9.98e-20	---	chr1	9538951	11637709	brc2017_riskregion__chr1_9538951_50	50	1
chr1	10581051	10581051	rs2506885:10581051:A:T	3.72e-20	---	chr1	9538951	11637709	brc2017_riskregion__chr1_9538951_50	50	1
chr1	10581658	10581658	rs2056417:10581658:G:A	2.24e-19	---	chr1	9538951	11637709	brc2017_riskregion__chr1_9538951_50	50	1
chr1	10582047	10582047	rs2483678:10582047:T:C	9.57e-06	---	chr1	9538951	11637709	brc2017_riskregion__chr1_9538951_50	50	1
chr1	10584346	10584346	rs7522072:10584346:T:C	9.77e-06	+++	chr1	9538951	11637709	brc2017_riskregion__chr1_9538951_50	50	1
chr1	10585046	10585046	rs2480789:10585046:C:T	9.83e-07	---	chr1	9538951	11637709	brc2017_riskregion__chr1_9538951_50	50	1
chr1	10586801	10586801	rs2988399:10586801:T:A	6.53e-07	---	chr1	9538951	11637709	brc2017_riskregion__chr1_9538951_50	50	1
chr1	10587794	10587794	rs2039176:10587794:G:A	5.68e-08	---	chr1	9538951	11637709	brc2017_riskregion__chr1_9538951_50	50	1
chr1	10587841	10587841	rs2039175:10587841:A:G	5.82e-08	---	chr1	9538951	11637709	brc2017_riskregion__chr1_9538951_50	50	1
chr1	10592231	10592231	rs12403130:10592231:C:G	1.52e-06	+++	chr1	9538951	11637709	brc2017_riskregion__chr1_9538951_50	50	1
chr1	10593296	10593296	rs2480782:10593296:G:T	1.48e-10	---	chr1	9538951	11637709	brc2017_riskregion__chr1_9538951_50	50	1
chr1	10593541	10593541	rs2480781:10593541:T:A	2.3e-09	---	chr1	9538951	11637709	brc2017_riskregion__chr1_9538951_50	50	1
chr1	10594790	10594790	rs2026792:10594790:A:G	4.32e-20	---	chr1	9538951	11637709	brc2017_riskregion__chr1_9538951_50	50	1
chr1	10595211	10595211	rs2480780:10595211:T:C	1.64e-08	---	chr1	9538951	11637709	brc2017_riskregion__chr1_9538951_50	50	1
chr1	10596022	10596022	rs2506889:10596022:C:T	2.38e-20	---	chr1	9538951	11637709	brc2017_riskregion__chr1_9538951_50	50	1
chr1	10596341	10596341	rs12375:10596341:C:T	2.51e-20	---	chr1	9538951	11637709	brc2017_riskregion__chr1_9538951_50	50	1
chr1	10596622	10596622	rs10779738:10596622:G:A	2.54e-08	+++	chr1	9538951	11637709	brc2017_riskregion__chr1_9538951_50	50	1
chr1	10596624	10596624	rs10864461:10596624:C:T	2.53e-08	+++	chr1	9538951	11637709	brc2017_riskregion__chr1_9538951_50	50	1
chr1	10597217	10597217	rs4240914:10597217:A:C	3.05e-08	+++	chr1	9538951	11637709	brc2017_riskregion__chr1_9538951_50	50	1
chr1	10597551	10597551	rs2480777:10597551:C:T	3.07e-20	---	chr1	9538951	11637709	brc2017_riskregion__chr1_9538951_50	50	1
chr1	10598216	10598216	rs2506892:10598216:G:A	2.51e-20	---	chr1	9538951	11637709	brc2017_riskregion__chr1_9538951_50	50	1
chr1	10599643	10599643	rs78653043:10599643:CAT:C	2.35e-09	---	chr1	9538951	11637709	brc2017_riskregion__chr1_9538951_50	50	1
chr1	10601761	10601761	rs6681221:10601761:G:A	2.98e-08	+++	chr1	9538951	11637709	brc2017_riskregion__chr1_9538951_50	50	1
chr1	10602758	10602758	rs2988398:10602758:C:T	3.01e-09	---	chr1	9538951	11637709	brc2017_riskregion__chr1_9538951_50	50	1
chr1	10602784	10602784	rs61394893:10602784:C:CTCCA	3.13e-08	+++	chr1	9538951	11637709	brc2017_riskregion__chr1_9538951_50	50	1
chr1	10603716	10603716	rs2506896:10603716:T:C	4.64e-20	---	chr1	9538951	11637709	brc2017_riskregion__chr1_9538951_50	50	1
chr1	10603892	10603892	rs2506897:10603892:A:G	3.04e-09	---	chr1	9538951	11637709	brc2017_riskregion__chr1_9538951_50	50	1
chr1	10604539	10604539	rs2506898:10604539:G:A	3.39e-09	---	chr1	9538951	11637709	brc2017_riskregion__chr1_9538951_50	50	1
chr1	10606996	10606996	rs2480775:10606996:G:T	7.46e-09	---	chr1	9538951	11637709	brc2017_riskregion__chr1_9538951_50	50	1
chr1	10607394	10607394	rs710130:10607394:C:T	3.9e-10	---	chr1	9538951	11637709	brc2017_riskregion__chr1_9538951_50	50	1
chr1	10607451	10607451	rs944191:10607451:T:C	4.38e-09	+++	chr1	9538951	11637709	brc2017_riskregion__chr1_9538951_50	50	1
chr1	10608596	10608596	rs4846230:10608596:T:C	4.88e-09	---	chr1	9538951	11637709	brc2017_riskregion__chr1_9538951_50	50	1
chr1	10609090	10609090	rs2480773:10609090:C:T	5.35e-09	---	chr1	9538951	11637709	brc2017_riskregion__chr1_9538951_50	50	1
chr1	10609395	10609395	rs12128630:10609395:C:T	5.3e-09	+++	chr1	9538951	11637709	brc2017_riskregion__chr1_9538951_50	50	1
chr1	10609460	10609460	rs2480772:10609460:C:T	4.84e-09	---	chr1	9538951	11637709	brc2017_riskregion__chr1_9538951_50	50	1
chr1	10609973	10609973	rs2150038:10609973:G:T	7.96e-20	---	chr1	9538951	11637709	brc2017_riskregion__chr1_9538951_50	50	1
chr1	10610129	10610129	rs2183377:10610129:G:A	3.52e-08	+++	chr1	9538951	11637709	brc2017_riskregion__chr1_9538951_50	50	1
chr1	10610876	10610876	rs2506900:10610876:G:A	4.77e-09	---	chr1	9538951	11637709	brc2017_riskregion__chr1_9538951_50	50	1
chr1	10611594	10611594	rs2480771:10611594:A:T	4.73e-09	---	chr1	9538951	11637709	brc2017_riskregion__chr1_9538951_50	50	1
chr1	10612075	10612075	rs6700023:10612075:G:A	4.69e-09	---	chr1	9538951	11637709	brc2017_riskregion__chr1_9538951_50	50	1
chr1	10612636	10612636	rs4846231:10612636:A:C	4.66e-09	---	chr1	9538951	11637709	brc2017_riskregion__chr1_9538951_50	50	1
chr1	10612810	10612810	rs4846232:10612810:T:C	4.45e-09	---	chr1	9538951	11637709	brc2017_riskregion__chr1_9538951_50	50	1
chr1	10612820	10612820	rs9430149:10612820:G:C	5.05e-20	---	chr1	9538951	11637709	brc2017_riskregion__chr1_9538951_50	50	1
chr1	10613344	10613344	rs10157111:10613344:T:G	4.6e-09	+++	chr1	9538951	11637709	brc2017_riskregion__chr1_9538951_50	50	1
chr1	10613351	10613351	rs12725704:10613351:T:C	4.88e-10	---	chr1	9538951	11637709	brc2017_riskregion__chr1_9538951_50	50	1
chr1	10613497	10613497	rs10157119:10613497:T:C	4.8e-09	+++	chr1	9538951	11637709	brc2017_riskregion__chr1_9538951_50	50	1
chr1	10613560	10613560	rs10864463:10613560:A:G	4.44e-09	---	chr1	9538951	11637709	brc2017_riskregion__chr1_9538951_50	50	1
chr1	10614233	10614233	rs35612158:10614233:C:T	4.22e-09	+++	chr1	9538951	11637709	brc2017_riskregion__chr1_9538951_50	50	1
chr1	10614804	10614804	rs67488812:10614804:A:G	5.44e-20	---	chr1	9538951	11637709	brc2017_riskregion__chr1_9538951_50	50	1
chr1	10615189	10615189	rs10779739:10615189:C:A	4.57e-09	---	chr1	9538951	11637709	brc2017_riskregion__chr1_9538951_50	50	1
chr1	10615775	10615775	rs11121584:10615775:T:C	4.76e-09	---	chr1	9538951	11637709	brc2017_riskregion__chr1_9538951_50	50	1
chr1	10616228	10616228	rs4846233:10616228:G:A	4.37e-09	---	chr1	9538951	11637709	brc2017_riskregion__chr1_9538951_50	50	1
chr1	10616484	10616484	rs4240915:10616484:C:T	5.25e-09	---	chr1	9538951	11637709	brc2017_riskregion__chr1_9538951_50	50	1
chr1	10616505	10616505	rs17035305:10616505:C:A	5.06e-20	---	chr1	9538951	11637709	brc2017_riskregion__chr1_9538951_50	50	1
chr1	10617034	10617034	rs12028449:10617034:G:A	6.22e-20	---	chr1	9538951	11637709	brc2017_riskregion__chr1_9538951_50	50	1
chr1	10617272	10617272	rs9660006:10617272:A:T	4.8e-09	---	chr1	9538951	11637709	brc2017_riskregion__chr1_9538951_50	50	1
chr1	10617591	10617591	rs11121585:10617591:T:C	4.81e-09	---	chr1	9538951	11637709	brc2017_riskregion__chr1_9538951_50	50	1
chr1	10617891	10617891	rs70997249:10617891:CT:C	2.68e-09	---	chr1	9538951	11637709	brc2017_riskregion__chr1_9538951_50	50	1
chr1	10617906	10617906	rs12121311:10617906:T:A	3.06e-08	---	chr1	9538951	11637709	brc2017_riskregion__chr1_9538951_50	50	1
chr1	10617924	10617924	rs12402967:10617924:T:C	5.7e-10	---	chr1	9538951	11637709	brc2017_riskregion__chr1_9538951_50	50	1
chr1	10618109	10618109	rs11121587:10618109:A:G	4.76e-20	---	chr1	9538951	11637709	brc2017_riskregion__chr1_9538951_50	50	1
chr1	10618804	10618804	rs7545184:10618804:A:G	4.22e-08	+++	chr1	9538951	11637709	brc2017_riskregion__chr1_9538951_50	50	1
chr1	10618991	10618991	rs11121588:10618991:A:T	6.28e-09	---	chr1	9538951	11637709	brc2017_riskregion__chr1_9538951_50	50	1
chr1	10618994	10618994	rs11121589:10618994:C:A	6.28e-09	---	chr1	9538951	11637709	brc2017_riskregion__chr1_9538951_50	50	1
chr1	10619965	10619965	rs6658073:10619965:G:C	3.97e-09	---	chr1	9538951	11637709	brc2017_riskregion__chr1_9538951_50	50	1
chr1	10620123	10620123	rs6700886:10620123:T:C	3.98e-09	---	chr1	9538951	11637709	brc2017_riskregion__chr1_9538951_50	50	1
chr1	10620239	10620239	rs61777207:10620239:C:T	4.19e-09	+++	chr1	9538951	11637709	brc2017_riskregion__chr1_9538951_50	50	1
chr1	10620270	10620270	rs10746495:10620270:A:G	3.88e-09	---	chr1	9538951	11637709	brc2017_riskregion__chr1_9538951_50	50	1
chr1	10620719	10620719	rs9661121:10620719:T:C	2.53e-10	---	chr1	9538951	11637709	brc2017_riskregion__chr1_9538951_50	50	1
chr1	10620773	10620773	rs9660903:10620773:A:C	1.17e-08	---	chr1	9538951	11637709	brc2017_riskregion__chr1_9538951_50	50	1
chr1	10621050	10621050	rs58788814:10621050:A:G	3.14e-08	+++	chr1	9538951	11637709	brc2017_riskregion__chr1_9538951_50	50	1
chr1	10621061	10621061	rs34575776:10621061:A:G	2.11e-19	---	chr1	9538951	11637709	brc2017_riskregion__chr1_9538951_50	50	1
chr1	10621363	10621363	rs7519424:10621363:G:A	3.57e-10	---	chr1	9538951	11637709	brc2017_riskregion__chr1_9538951_50	50	1
chr1	10622374	10622374	rs7512467:10622374:A:G	3.04e-08	+++	chr1	9538951	11637709	brc2017_riskregion__chr1_9538951_50	50	1
chr1	10622915	10622915	rs35409029:10622915:T:C	3.51e-10	---	chr1	9538951	11637709	brc2017_riskregion__chr1_9538951_50	50	1
chr1	10622971	10622971	rs35438761:10622971:C:CT	2.53e-10	---	chr1	9538951	11637709	brc2017_riskregion__chr1_9538951_50	50	1
chr1	10622976	10622976	rs56219403:10622976:C:T	3.55e-10	---	chr1	9538951	11637709	brc2017_riskregion__chr1_9538951_50	50	1
chr1	10623176	10623176	rs61777208:10623176:T:C	4.21e-09	+++	chr1	9538951	11637709	brc2017_riskregion__chr1_9538951_50	50	1
chr1	10623239	10623239	rs12750901:10623239:T:C	3.49e-10	---	chr1	9538951	11637709	brc2017_riskregion__chr1_9538951_50	50	1
chr1	10624057	10624057	rs59001371:10624057:CAT:C	2.7e-08	+++	chr1	9538951	11637709	brc2017_riskregion__chr1_9538951_50	50	1
chr1	10624315	10624315	rs6663688:10624315:A:G	3.16e-10	---	chr1	9538951	11637709	brc2017_riskregion__chr1_9538951_50	50	1
chr1	10624468	10624468	rs6663898:10624468:A:G	3.8e-10	---	chr1	9538951	11637709	brc2017_riskregion__chr1_9538951_50	50	1
chr1	10625495	10625495	rs4845936:10625495:A:T	4.13e-09	+++	chr1	9538951	11637709	brc2017_riskregion__chr1_9538951_50	50	1
chr1	10626287	10626287	rs11121593:10626287:G:T	3.44e-10	---	chr1	9538951	11637709	brc2017_riskregion__chr1_9538951_50	50	1
chr1	10626550	10626550	rs56355612:10626550:CT:C	7.05e-11	---	chr1	9538951	11637709	brc2017_riskregion__chr1_9538951_50	50	1
chr1	10626922	10626922	rs11121594:10626922:G:C	3.47e-10	---	chr1	9538951	11637709	brc2017_riskregion__chr1_9538951_50	50	1
chr1	10627542	10627542	rs12033275:10627542:G:T	3.01e-08	+++	chr1	9538951	11637709	brc2017_riskregion__chr1_9538951_50	50	1
chr1	10627619	10627619	rs6661757:10627619:C:T	3.54e-10	---	chr1	9538951	11637709	brc2017_riskregion__chr1_9538951_50	50	1
chr1	10627701	10627701	rs114425920:10627701:A:G	3.02e-08	+++	chr1	9538951	11637709	brc2017_riskregion__chr1_9538951_50	50	1
chr1	10628350	10628350	rs12753364:10628350:G:A	3.34e-10	---	chr1	9538951	11637709	brc2017_riskregion__chr1_9538951_50	50	1
chr1	10628882	10628882	rs10779743:10628882:C:T	3.32e-10	---	chr1	9538951	11637709	brc2017_riskregion__chr1_9538951_50	50	1
chr1	10629133	10629133	rs10779744:10629133:C:A	3.36e-10	---	chr1	9538951	11637709	brc2017_riskregion__chr1_9538951_50	50	1
chr1	10629562	10629562	rs12565494:10629562:G:A	3.43e-10	---	chr1	9538951	11637709	brc2017_riskregion__chr1_9538951_50	50	1
chr1	10630966	10630966	rs34230252:10630966:G:A	3.3e-10	---	chr1	9538951	11637709	brc2017_riskregion__chr1_9538951_50	50	1
chr1	10631739	10631739	rs7534954:10631739:G:A	3.31e-10	---	chr1	9538951	11637709	brc2017_riskregion__chr1_9538951_50	50	1
chr1	10631811	10631811	rs7524790:10631811:A:C	3.26e-10	---	chr1	9538951	11637709	brc2017_riskregion__chr1_9538951_50	50	1
chr1	10631815	10631815	rs12133103:10631815:G:A	3.26e-10	---	chr1	9538951	11637709	brc2017_riskregion__chr1_9538951_50	50	1
chr1	10632235	10632235	rs4846235:10632235:C:T	8.64e-20	---	chr1	9538951	11637709	brc2017_riskregion__chr1_9538951_50	50	1
chr1	10632615	10632615	rs72641424:10632615:A:G	3.86e-08	+++	chr1	9538951	11637709	brc2017_riskregion__chr1_9538951_50	50	1
chr1	10632647	10632647	rs4846237:10632647:G:A	4.34e-10	---	chr1	9538951	11637709	brc2017_riskregion__chr1_9538951_50	50	1
chr1	10632737	10632737	rs36116008:10632737:GC:G	1.69e-10	---	chr1	9538951	11637709	brc2017_riskregion__chr1_9538951_50	50	1
chr1	10633245	10633245	rs6687430:10633245:G:A	5.9e-12	+++	chr1	9538951	11637709	brc2017_riskregion__chr1_9538951_50	50	1
chr1	10633273	10633273	rs6687502:10633273:G:A	3.59e-10	---	chr1	9538951	11637709	brc2017_riskregion__chr1_9538951_50	50	1
chr1	10633453	10633453	rs6687622:10633453:G:A	3.23e-10	---	chr1	9538951	11637709	brc2017_riskregion__chr1_9538951_50	50	1
chr1	10633489	10633489	rs78507554:10633489:A:G	2.4e-07	+++	chr1	9538951	11637709	brc2017_riskregion__chr1_9538951_50	50	1
chr1	10633543	10633543	rs6664134:10633543:C:A	3.25e-10	---	chr1	9538951	11637709	brc2017_riskregion__chr1_9538951_50	50	1
chr1	10633651	10633651	rs12129678:10633651:G:A	2.69e-08	+++	chr1	9538951	11637709	brc2017_riskregion__chr1_9538951_50	50	1
chr1	10634171	10634171	rs7536149:10634171:T:C	2.53e-09	---	chr1	9538951	11637709	brc2017_riskregion__chr1_9538951_50	50	1
chr1	10634195	10634195	rs72641427:10634195:A:T	4.98e-07	+++	chr1	9538951	11637709	brc2017_riskregion__chr1_9538951_50	50	1
chr1	10635121	10635121	rs10864465:10635121:G:A	7.95e-08	+++	chr1	9538951	11637709	brc2017_riskregion__chr1_9538951_50	50	1
chr1	10635131	10635131	rs142120114:10635131:T:TA	8.66e-18	---	chr1	9538951	11637709	brc2017_riskregion__chr1_9538951_50	50	1
chr1	10635362	10635362	rs11121596:10635362:C:T	2.08e-08	+++	chr1	9538951	11637709	brc2017_riskregion__chr1_9538951_50	50	1
chr1	10635656	10635656	rs4845937:10635656:T:C	1.41e-09	---	chr1	9538951	11637709	brc2017_riskregion__chr1_9538951_50	50	1
chr1	10636443	10636443	rs6540937:10636443:G:A	3.26e-10	---	chr1	9538951	11637709	brc2017_riskregion__chr1_9538951_50	50	1
chr1	10636459	10636459	rs6540938:10636459:G:A	3.23e-10	---	chr1	9538951	11637709	brc2017_riskregion__chr1_9538951_50	50	1
chr1	10636853	10636853	rs11121597:10636853:C:T	3.38e-08	+++	chr1	9538951	11637709	brc2017_riskregion__chr1_9538951_50	50	1
chr1	10636955	10636955	rs4617401:10636955:A:T	3.5e-10	---	chr1	9538951	11637709	brc2017_riskregion__chr1_9538951_50	50	1
chr1	10637246	10637246	rs5772421:10637246:C:CAGG	1.77e-10	---	chr1	9538951	11637709	brc2017_riskregion__chr1_9538951_50	50	1
chr1	10637467	10637467	rs70997256:10637467:C:CA	7.52e-07	+++	chr1	9538951	11637709	brc2017_riskregion__chr1_9538951_50	50	1
chr1	10637709	10637709	rs112436634:10637709:C:T	1.61e-19	---	chr1	9538951	11637709	brc2017_riskregion__chr1_9538951_50	50	1
chr1	10637841	10637841	rs59163005:10637841:T:TA	2.69e-08	+++	chr1	9538951	11637709	brc2017_riskregion__chr1_9538951_50	50	1
chr1	10638604	10638604	rs12741973:10638604:C:T	3.87e-13	---	chr1	9538951	11637709	brc2017_riskregion__chr1_9538951_50	50	1
chr1	10641803	10641803	rs201651535:10641803:TTAATTTA:T	1.51e-08	+++	chr1	9538951	11637709	brc2017_riskregion__chr1_9538951_50	50	1
chr1	10658202	10658202	rs11121598:10658202:G:A	4.85e-06	+++	chr1	9538951	11637709	brc2017_riskregion__chr1_9538951_50	50	1
chr1	10666592	10666592	rs35174451:10666592:TG:T	9.69e-07	+++	chr1	9538951	11637709	brc2017_riskregion__chr1_9538951_50	50	1
chr1	10666646	10666646	rs284280:10666646:C:T	1.36e-06	+++	chr1	9538951	11637709	brc2017_riskregion__chr1_9538951_50	50	1
chr1	10669517	10669517	rs576102:10669517:T:A	1.3e-06	+++	chr1	9538951	11637709	brc2017_riskregion__chr1_9538951_50	50	1
chr1	10672429	10672429	rs488854:10672429:C:G	1.64e-06	+++	chr1	9538951	11637709	brc2017_riskregion__chr1_9538951_50	50	1
chr1	10672935	10672935	rs481453:10672935:A:G	1.76e-06	+++	chr1	9538951	11637709	brc2017_riskregion__chr1_9538951_50	50	1
chr1	10694907	10694907	rs61776290:10694907:C:T	7.35e-06	+++	chr1	9538951	11637709	brc2017_riskregion__chr1_9538951_50	50	1
chr1	10697878	10697878	rs199867187:10697878:GA:G	1.36e-06	+++	chr1	9538951	11637709	brc2017_riskregion__chr1_9538951_50	50	1
chr1	10703203	10703203	rs146039805:10703203:G:GC	5.7e-06	++-	chr1	9538951	11637709	brc2017_riskregion__chr1_9538951_50	50	1
chr1	10704688	10704688	rs11587145:10704688:C:T	5.43e-06	++-	chr1	9538951	11637709	brc2017_riskregion__chr1_9538951_50	50	1
chr1	10709267	10709267	rs12143134:10709267:C:T	7.11e-06	++-	chr1	9538951	11637709	brc2017_riskregion__chr1_9538951_50	50	1
chr1	10718731	10718731	rs150195305:10718731:CCTCTG:C	7.7e-06	++-	chr1	9538951	11637709	brc2017_riskregion__chr1_9538951_50	50	1
chr1	10719374	10719374	rs201491783:10719374:T:TG	2.41e-06	++-	chr1	9538951	11637709	brc2017_riskregion__chr1_9538951_50	50	1
chr1	10719380	10719380	1:10719380:GT:G	2.46e-06	++-	chr1	9538951	11637709	brc2017_riskregion__chr1_9538951_50	50	1
chr1	10719384	10719384	1:10719384:TGTCATGG:T	2.59e-06	++-	chr1	9538951	11637709	brc2017_riskregion__chr1_9538951_50	50	1
chr1	10719549	10719549	rs540329:10719549:G:A	9.44e-06	++-	chr1	9538951	11637709	brc2017_riskregion__chr1_9538951_50	50	1
chr1	10728048	10728048	rs74451129:10728048:C:T	4.83e-06	---	chr1	9538951	11637709	brc2017_riskregion__chr1_9538951_50	50	1
chr1	17706932	17706932	rs1924553:17706932:A:G	5.4e-07	---	na	na	na	none	na	1
chr1	17742024	17742024	rs12093070:17742024:T:C	7.32e-06	---	na	na	na	none	na	1
chr1	17753749	17753749	rs6586541:17753749:C:T	2.45e-06	---	na	na	na	none	na	1
chr1	17757937	17757937	rs7549366:17757937:C:T	6.71e-06	---	na	na	na	none	na	1
chr1	17765756	17765756	rs11203388:17765756:C:T	8.14e-06	---	na	na	na	none	na	1
chr1	17765826	17765826	rs34171604:17765826:CT:C	2.87e-06	---	na	na	na	none	na	1
chr1	17768251	17768251	rs6664643:17768251:C:T	7.48e-06	---	na	na	na	none	na	1
chr1	17772093	17772093	rs72906468:17772093:A:T	2.25e-06	---	na	na	na	none	na	1
chr1	17772112	17772112	rs111631670:17772112:A:T	7.74e-06	---	na	na	na	none	na	1
chr1	17773159	17773159	rs2883272:17773159:G:A	6.81e-07	---	na	na	na	none	na	1
chr1	18791128	18791128	rs35225017:18791128:G:A	9.4e-08	---	chr1	17807339	19807339	brc2017_riskregion__chr1_17807339_1	1	1
chr1	18791334	18791334	rs12747775:18791334:C:T	1.37e-07	---	chr1	17807339	19807339	brc2017_riskregion__chr1_17807339_1	1	1
chr1	18791778	18791778	rs3007726:18791778:G:A	7.3e-06	---	chr1	17807339	19807339	brc2017_riskregion__chr1_17807339_1	1	1
chr1	18793636	18793636	rs11261014:18793636:C:T	9.19e-08	---	chr1	17807339	19807339	brc2017_riskregion__chr1_17807339_1	1	1
chr1	18799285	18799285	rs12724155:18799285:C:A	4.45e-08	---	chr1	17807339	19807339	brc2017_riskregion__chr1_17807339_1	1	1
chr1	18800247	18800247	rs6665151:18800247:A:G	4.2e-07	---	chr1	17807339	19807339	brc2017_riskregion__chr1_17807339_1	1	1
chr1	18800387	18800387	rs2992735:18800387:T:A	6.31e-12	---	chr1	17807339	19807339	brc2017_riskregion__chr1_17807339_1	1	1
chr1	18800547	18800547	rs2992734:18800547:A:G	9.41e-09	--+	chr1	17807339	19807339	brc2017_riskregion__chr1_17807339_1	1	1
chr1	18800911	18800911	rs3007733:18800911:C:T	1.08e-11	---	chr1	17807339	19807339	brc2017_riskregion__chr1_17807339_1	1	1
chr1	18801089	18801089	rs71018084:18801089:T:TGTGTGGGTGTGC	1.59e-11	---	chr1	17807339	19807339	brc2017_riskregion__chr1_17807339_1	1	1
chr1	18801606	18801606	rs3049905:18801606:TAAA:TA	3.07e-10	---	chr1	17807339	19807339	brc2017_riskregion__chr1_17807339_1	1	1
chr1	18801697	18801697	rs1360916:18801697:G:A	9.79e-12	---	chr1	17807339	19807339	brc2017_riskregion__chr1_17807339_1	1	1
chr1	18801804	18801804	rs1360915:18801804:T:C	9.32e-12	---	chr1	17807339	19807339	brc2017_riskregion__chr1_17807339_1	1	1
chr1	18801847	18801847	rs34136920:18801847:CT:C	6.22e-12	---	chr1	17807339	19807339	brc2017_riskregion__chr1_17807339_1	1	1
chr1	18802387	18802387	rs1316327:18802387:G:A	9.66e-12	---	chr1	17807339	19807339	brc2017_riskregion__chr1_17807339_1	1	1
chr1	18802825	18802825	rs2992732:18802825:G:A	6.12e-12	---	chr1	17807339	19807339	brc2017_riskregion__chr1_17807339_1	1	1
chr1	18803022	18803022	rs3007734:18803022:T:C	4.78e-12	---	chr1	17807339	19807339	brc2017_riskregion__chr1_17807339_1	1	1
chr1	18803622	18803622	rs1932583:18803622:T:G	3.84e-10	---	chr1	17807339	19807339	brc2017_riskregion__chr1_17807339_1	1	1
chr1	18804144	18804144	rs2992764:18804144:G:A	9.08e-12	---	chr1	17807339	19807339	brc2017_riskregion__chr1_17807339_1	1	1
chr1	18804386	18804386	rs2992763:18804386:G:A	6.57e-12	---	chr1	17807339	19807339	brc2017_riskregion__chr1_17807339_1	1	1
chr1	18804609	18804609	rs2992762:18804609:A:G	5.76e-12	---	chr1	17807339	19807339	brc2017_riskregion__chr1_17807339_1	1	1
chr1	18804674	18804674	rs2992761:18804674:G:A	6.43e-12	---	chr1	17807339	19807339	brc2017_riskregion__chr1_17807339_1	1	1
chr1	18804792	18804792	rs71018085:18804792:A:AAC	9.04e-12	---	chr1	17807339	19807339	brc2017_riskregion__chr1_17807339_1	1	1
chr1	18804821	18804821	rs2992760:18804821:G:A	6.3e-12	---	chr1	17807339	19807339	brc2017_riskregion__chr1_17807339_1	1	1
chr1	18804922	18804922	rs71512941:18804922:A:G	6.33e-12	---	chr1	17807339	19807339	brc2017_riskregion__chr1_17807339_1	1	1
chr1	18805019	18805019	rs200439143:18805019:GGA:G	2.88e-12	---	chr1	17807339	19807339	brc2017_riskregion__chr1_17807339_1	1	1
chr1	18805048	18805048	rs12750779:18805048:G:A	6.46e-12	---	chr1	17807339	19807339	brc2017_riskregion__chr1_17807339_1	1	1
chr1	18805328	18805328	rs11261017:18805328:T:C	1.84e-07	---	chr1	17807339	19807339	brc2017_riskregion__chr1_17807339_1	1	1
chr1	18805535	18805535	rs11261018:18805535:C:T	2.69e-07	---	chr1	17807339	19807339	brc2017_riskregion__chr1_17807339_1	1	1
chr1	18805536	18805536	rs11261019:18805536:G:A	2.37e-07	---	chr1	17807339	19807339	brc2017_riskregion__chr1_17807339_1	1	1
chr1	18805564	18805564	rs11261020:18805564:T:C	2.72e-07	---	chr1	17807339	19807339	brc2017_riskregion__chr1_17807339_1	1	1
chr1	18805678	18805678	rs12061898:18805678:A:G	2.61e-07	---	chr1	17807339	19807339	brc2017_riskregion__chr1_17807339_1	1	1
chr1	18805844	18805844	rs1360919:18805844:T:C	9.35e-12	---	chr1	17807339	19807339	brc2017_riskregion__chr1_17807339_1	1	1
chr1	18805880	18805880	rs7517421:18805880:C:A	2.65e-07	---	chr1	17807339	19807339	brc2017_riskregion__chr1_17807339_1	1	1
chr1	18806084	18806084	rs4920322:18806084:T:C	2.25e-07	---	chr1	17807339	19807339	brc2017_riskregion__chr1_17807339_1	1	1
chr1	18806137	18806137	rs4920323:18806137:G:A	2.18e-07	---	chr1	17807339	19807339	brc2017_riskregion__chr1_17807339_1	1	1
chr1	18806245	18806245	rs4920501:18806245:G:A	1.23e-08	---	chr1	17807339	19807339	brc2017_riskregion__chr1_17807339_1	1	1
chr1	18806585	18806585	rs10796456:18806585:G:T	9.93e-09	---	chr1	17807339	19807339	brc2017_riskregion__chr1_17807339_1	1	1
chr1	18806933	18806933	rs11261021:18806933:T:C	1.71e-07	---	chr1	17807339	19807339	brc2017_riskregion__chr1_17807339_1	1	1
chr1	18807137	18807137	rs2992757:18807137:T:C	2.26e-12	---	chr1	17807339	19807339	brc2017_riskregion__chr1_17807339_1	1	1
chr1	18807339	18807339	rs2992756:18807339:T:C	1.6e-15	---	chr1	17807339	19807339	brc2017_riskregion__chr1_17807339_1	1	1
chr1	18807897	18807897	rs2992755:18807897:C:G	3.43e-12	---	chr1	17807339	19807339	brc2017_riskregion__chr1_17807339_1	1	1
chr1	18807953	18807953	rs11261022:18807953:C:A	2.72e-12	---	chr1	17807339	19807339	brc2017_riskregion__chr1_17807339_1	1	1
chr1	18808292	18808292	rs2992753:18808292:C:A	1.18e-12	---	chr1	17807339	19807339	brc2017_riskregion__chr1_17807339_1	1	1
chr1	18808465	18808465	rs3007718:18808465:T:A	1.59e-12	---	chr1	17807339	19807339	brc2017_riskregion__chr1_17807339_1	1	1
chr1	18808526	18808526	rs2992752:18808526:A:C	1.56e-12	---	chr1	17807339	19807339	brc2017_riskregion__chr1_17807339_1	1	1
chr1	18809896	18809896	rs2992745:18809896:A:T	4.14e-11	---	chr1	17807339	19807339	brc2017_riskregion__chr1_17807339_1	1	1
chr1	18809916	18809916	rs12061708:18809916:G:A	2.55e-11	---	chr1	17807339	19807339	brc2017_riskregion__chr1_17807339_1	1	1
chr1	18810344	18810344	rs2992740:18810344:G:T	3.53e-10	---	chr1	17807339	19807339	brc2017_riskregion__chr1_17807339_1	1	1
chr1	18811668	18811668	rs3007719:18811668:T:C	7.65e-10	---	chr1	17807339	19807339	brc2017_riskregion__chr1_17807339_1	1	1
chr1	18812176	18812176	rs872355:18812176:G:A	3.59e-07	---	chr1	17807339	19807339	brc2017_riskregion__chr1_17807339_1	1	1
chr1	18812478	18812478	rs72275238:18812478:CA:C	2.72e-08	---	chr1	17807339	19807339	brc2017_riskregion__chr1_17807339_1	1	1
chr1	18814565	18814565	rs10907313:18814565:C:T	5.16e-06	--+	chr1	17807339	19807339	brc2017_riskregion__chr1_17807339_1	1	1
chr1	18814596	18814596	rs11577512:18814596:G:A	6.1e-07	---	chr1	17807339	19807339	brc2017_riskregion__chr1_17807339_1	1	1
chr1	21023194	21023194	1:21023194:A:C	3.3e-06	++?	na	na	na	none	na	1
chr1	41380440	41380440	rs4233486:41380440:C:T	9.09e-09	+++	chr1	40380440	47813663	brc2017_riskregion__chr1_40380440_299	299	1
chr1	41381680	41381680	rs35054111:41381680:T:TA	2.95e-08	+++	chr1	40380440	47813663	brc2017_riskregion__chr1_40380440_299	299	1
chr1	41384452	41384452	rs11808410:41384452:C:G	9.33e-07	+++	chr1	40380440	47813663	brc2017_riskregion__chr1_40380440_299	299	1
chr1	41384733	41384733	rs11587311:41384733:C:G	9.42e-07	+++	chr1	40380440	47813663	brc2017_riskregion__chr1_40380440_299	299	1
chr1	41386532	41386532	rs11804913:41386532:T:A	8.91e-07	+++	chr1	40380440	47813663	brc2017_riskregion__chr1_40380440_299	299	1
chr1	41387003	41387003	rs7554973:41387003:T:C	8.17e-07	+++	chr1	40380440	47813663	brc2017_riskregion__chr1_40380440_299	299	1
chr1	41387693	41387693	rs6663375:41387693:G:T	1.42e-06	+++	chr1	40380440	47813663	brc2017_riskregion__chr1_40380440_299	299	1
chr1	41388821	41388821	rs7513904:41388821:T:C	2.14e-06	+++	chr1	40380440	47813663	brc2017_riskregion__chr1_40380440_299	299	1
chr1	41391103	41391103	rs10889732:41391103:A:G	1.22e-06	+++	chr1	40380440	47813663	brc2017_riskregion__chr1_40380440_299	299	1
chr1	41397716	41397716	rs6600358:41397716:C:A	2.1e-06	+++	chr1	40380440	47813663	brc2017_riskregion__chr1_40380440_299	299	1
chr1	41400034	41400034	rs1159941:41400034:A:G	2.69e-06	+++	chr1	40380440	47813663	brc2017_riskregion__chr1_40380440_299	299	1
chr1	41400581	41400581	rs10889742:41400581:C:T	2.7e-06	+++	chr1	40380440	47813663	brc2017_riskregion__chr1_40380440_299	299	1
chr1	41402143	41402143	rs4660492:41402143:T:C	4.75e-06	+++	chr1	40380440	47813663	brc2017_riskregion__chr1_40380440_299	299	1
chr1	41997764	41997764	rs181270898:41997764:G:A	4.61e-07	---	chr1	40380440	47813663	brc2017_riskregion__chr1_40380440_299	299	1
chr1	42018135	42018135	rs144427343:42018135:G:A	3.86e-06	+++	chr1	40380440	47813663	brc2017_riskregion__chr1_40380440_299	299	1
chr1	42070841	42070841	rs149113869:42070841:G:A	2.35e-06	---	chr1	40380440	47813663	brc2017_riskregion__chr1_40380440_299	299	1
chr1	42071132	42071132	rs111872439:42071132:G:A	2.33e-06	---	chr1	40380440	47813663	brc2017_riskregion__chr1_40380440_299	299	1
chr1	42074084	42074084	rs55766261:42074084:C:T	2.28e-06	---	chr1	40380440	47813663	brc2017_riskregion__chr1_40380440_299	299	1
chr1	42079660	42079660	rs112147695:42079660:C:G	1.78e-06	---	chr1	40380440	47813663	brc2017_riskregion__chr1_40380440_299	299	1
chr1	42082588	42082588	rs113164207:42082588:A:G	1.46e-06	---	chr1	40380440	47813663	brc2017_riskregion__chr1_40380440_299	299	1
chr1	42084411	42084411	rs113620420:42084411:C:G	1.33e-06	---	chr1	40380440	47813663	brc2017_riskregion__chr1_40380440_299	299	1
chr1	42086112	42086112	rs77174549:42086112:G:A	1.27e-06	---	chr1	40380440	47813663	brc2017_riskregion__chr1_40380440_299	299	1
chr1	42098408	42098408	rs113826633:42098408:C:T	6.74e-07	---	chr1	40380440	47813663	brc2017_riskregion__chr1_40380440_299	299	1
chr1	42102847	42102847	rs55657561:42102847:A:AC	6.28e-07	---	chr1	40380440	47813663	brc2017_riskregion__chr1_40380440_299	299	1
chr1	42103403	42103403	rs56384647:42103403:T:G	4.55e-07	---	chr1	40380440	47813663	brc2017_riskregion__chr1_40380440_299	299	1
chr1	42103769	42103769	rs749200:42103769:A:G	5.85e-07	+++	chr1	40380440	47813663	brc2017_riskregion__chr1_40380440_299	299	1
chr1	42112269	42112269	rs113208159:42112269:A:G	4.6e-07	---	chr1	40380440	47813663	brc2017_riskregion__chr1_40380440_299	299	1
chr1	42113326	42113326	rs7539032:42113326:A:C	1.15e-06	---	chr1	40380440	47813663	brc2017_riskregion__chr1_40380440_299	299	1
chr1	42114000	42114000	rs13375774:42114000:C:T	3.04e-07	---	chr1	40380440	47813663	brc2017_riskregion__chr1_40380440_299	299	1
chr1	42114733	42114733	rs78927801:42114733:C:T	2.43e-07	---	chr1	40380440	47813663	brc2017_riskregion__chr1_40380440_299	299	1
chr1	42117371	42117371	rs6701758:42117371:T:C	2.52e-07	---	chr1	40380440	47813663	brc2017_riskregion__chr1_40380440_299	299	1
chr1	42117689	42117689	rs10890157:42117689:C:G	5.51e-06	+++	chr1	40380440	47813663	brc2017_riskregion__chr1_40380440_299	299	1
chr1	42117792	42117792	rs12130138:42117792:A:C	6.24e-06	+++	chr1	40380440	47813663	brc2017_riskregion__chr1_40380440_299	299	1
chr1	42118424	42118424	rs111593435:42118424:T:C	2.18e-07	---	chr1	40380440	47813663	brc2017_riskregion__chr1_40380440_299	299	1
chr1	42119844	42119844	rs2148636:42119844:T:C	6.45e-06	+++	chr1	40380440	47813663	brc2017_riskregion__chr1_40380440_299	299	1
chr1	42124311	42124311	rs111492277:42124311:G:A	2.7e-07	---	chr1	40380440	47813663	brc2017_riskregion__chr1_40380440_299	299	1
chr1	42135781	42135781	rs113584804:42135781:G:A	7.59e-08	---	chr1	40380440	47813663	brc2017_riskregion__chr1_40380440_299	299	1
chr1	42137311	42137311	rs79724016:42137311:T:G	3.86e-08	---	chr1	40380440	47813663	brc2017_riskregion__chr1_40380440_299	299	1
chr1	42140564	42140564	rs112702760:42140564:C:G	5.26e-08	---	chr1	40380440	47813663	brc2017_riskregion__chr1_40380440_299	299	1
chr1	42140601	42140601	rs56394244:42140601:C:T	5.06e-08	---	chr1	40380440	47813663	brc2017_riskregion__chr1_40380440_299	299	1
chr1	42142663	42142663	rs74071909:42142663:G:T	6.25e-08	---	chr1	40380440	47813663	brc2017_riskregion__chr1_40380440_299	299	1
chr1	42143093	42143093	rs7548872:42143093:G:A	6.51e-08	---	chr1	40380440	47813663	brc2017_riskregion__chr1_40380440_299	299	1
chr1	42214930	42214930	rs113414440:42214930:T:C	6.06e-07	---	chr1	40380440	47813663	brc2017_riskregion__chr1_40380440_299	299	1
chr1	42233514	42233514	rs113516359:42233514:C:T	5.31e-07	---	chr1	40380440	47813663	brc2017_riskregion__chr1_40380440_299	299	1
chr1	42286930	42286930	rs78295797:42286930:G:A	9.49e-06	---	chr1	40380440	47813663	brc2017_riskregion__chr1_40380440_299	299	1
chr1	42997594	42997594	rs113566476:42997594:T:A	7.73e-06	---	chr1	40380440	47813663	brc2017_riskregion__chr1_40380440_299	299	1
chr1	43058124	43058124	rs113319441:43058124:C:T	6.14e-06	---	chr1	40380440	47813663	brc2017_riskregion__chr1_40380440_299	299	1
chr1	45765523	45765523	rs4484960:45765523:C:T	1.96e-06	---	chr1	40380440	47813663	brc2017_riskregion__chr1_40380440_299	299	1
chr1	45783656	45783656	rs9429071:45783656:G:A	5.19e-07	---	chr1	40380440	47813663	brc2017_riskregion__chr1_40380440_299	299	1
chr1	45797505	45797505	rs3219489:45797505:C:G	3.67e-06	---	chr1	40380440	47813663	brc2017_riskregion__chr1_40380440_299	299	1
chr1	45804050	45804050	rs3219472:45804050:C:T	4.64e-06	---	chr1	40380440	47813663	brc2017_riskregion__chr1_40380440_299	299	1
chr1	45806432	45806432	rs3219463:45806432:C:T	6.37e-06	---	chr1	40380440	47813663	brc2017_riskregion__chr1_40380440_299	299	1
chr1	45807358	45807358	rs35345162:45807358:GT:G	7.64e-06	---	chr1	40380440	47813663	brc2017_riskregion__chr1_40380440_299	299	1
chr1	45810091	45810091	rs9429072:45810091:A:G	4.58e-06	---	chr1	40380440	47813663	brc2017_riskregion__chr1_40380440_299	299	1
chr1	45813034	45813034	rs9429073:45813034:C:T	4.01e-06	---	chr1	40380440	47813663	brc2017_riskregion__chr1_40380440_299	299	1
chr1	45813441	45813441	rs2298018:45813441:T:C	4.08e-06	---	chr1	40380440	47813663	brc2017_riskregion__chr1_40380440_299	299	1
chr1	45813820	45813820	rs2153607:45813820:G:A	4.34e-06	---	chr1	40380440	47813663	brc2017_riskregion__chr1_40380440_299	299	1
chr1	45813941	45813941	rs2153608:45813941:A:G	3.93e-06	---	chr1	40380440	47813663	brc2017_riskregion__chr1_40380440_299	299	1
chr1	45814058	45814058	rs2153609:45814058:A:G	4.55e-06	---	chr1	40380440	47813663	brc2017_riskregion__chr1_40380440_299	299	1
chr1	45814103	45814103	rs2185549:45814103:T:C	4.69e-06	---	chr1	40380440	47813663	brc2017_riskregion__chr1_40380440_299	299	1
chr1	45815580	45815580	rs9429074:45815580:A:G	4.65e-06	---	chr1	40380440	47813663	brc2017_riskregion__chr1_40380440_299	299	1
chr1	45818421	45818421	rs9429075:45818421:G:A	6.86e-06	---	chr1	40380440	47813663	brc2017_riskregion__chr1_40380440_299	299	1
chr1	45819069	45819069	rs7544178:45819069:C:T	7.34e-06	---	chr1	40380440	47813663	brc2017_riskregion__chr1_40380440_299	299	1
chr1	45819489	45819489	rs9429076:45819489:T:C	7.59e-06	---	chr1	40380440	47813663	brc2017_riskregion__chr1_40380440_299	299	1
chr1	45819872	45819872	rs4660849:45819872:G:A	7.5e-06	---	chr1	40380440	47813663	brc2017_riskregion__chr1_40380440_299	299	1
chr1	45820149	45820149	rs4660301:45820149:T:A	7.37e-06	---	chr1	40380440	47813663	brc2017_riskregion__chr1_40380440_299	299	1
chr1	45820667	45820667	rs9429077:45820667:C:A	7.58e-06	---	chr1	40380440	47813663	brc2017_riskregion__chr1_40380440_299	299	1
chr1	45821393	45821393	rs9429158:45821393:A:G	7.98e-06	---	chr1	40380440	47813663	brc2017_riskregion__chr1_40380440_299	299	1
chr1	45823484	45823484	rs9429159:45823484:C:A	7.86e-06	---	chr1	40380440	47813663	brc2017_riskregion__chr1_40380440_299	299	1
chr1	45826272	45826272	rs112407805:45826272:T:TA	4.28e-06	---	chr1	40380440	47813663	brc2017_riskregion__chr1_40380440_299	299	1
chr1	45827968	45827968	rs9429160:45827968:G:T	7.91e-06	---	chr1	40380440	47813663	brc2017_riskregion__chr1_40380440_299	299	1
chr1	45828943	45828943	rs9326141:45828943:G:A	5.89e-06	---	chr1	40380440	47813663	brc2017_riskregion__chr1_40380440_299	299	1
chr1	45830824	45830824	rs2050884:45830824:A:G	3.79e-06	---	chr1	40380440	47813663	brc2017_riskregion__chr1_40380440_299	299	1
chr1	45831915	45831915	rs7417107:45831915:G:C	4.9e-06	---	chr1	40380440	47813663	brc2017_riskregion__chr1_40380440_299	299	1
chr1	45833328	45833328	1:45833328:A:AT	1.24e-07	---	chr1	40380440	47813663	brc2017_riskregion__chr1_40380440_299	299	1
chr1	45834773	45834773	rs4520450:45834773:A:G	4.89e-06	---	chr1	40380440	47813663	brc2017_riskregion__chr1_40380440_299	299	1
chr1	45835041	45835041	rs9429161:45835041:T:C	5.33e-06	---	chr1	40380440	47813663	brc2017_riskregion__chr1_40380440_299	299	1
chr1	45839643	45839643	rs7543428:45839643:A:G	4.83e-06	---	chr1	40380440	47813663	brc2017_riskregion__chr1_40380440_299	299	1
chr1	45843086	45843086	rs7553318:45843086:A:G	3.92e-06	---	chr1	40380440	47813663	brc2017_riskregion__chr1_40380440_299	299	1
chr1	45843151	45843151	rs61791362:45843151:T:C	5.01e-06	---	chr1	40380440	47813663	brc2017_riskregion__chr1_40380440_299	299	1
chr1	45843810	45843810	rs4660851:45843810:A:T	5.12e-06	---	chr1	40380440	47813663	brc2017_riskregion__chr1_40380440_299	299	1
[truncated: 37,664 more rows]

## Sheet: LD_w_most_signif
SNP1 Name	SNP1 Chr	SNP1 Pos	SNP1 Ref	SNP1 Alt	SNP1 MAF	SNP1 Minor Allele	SNP2 Name	SNP2 Chr	SNP2 Pos	SNP2 Ref	SNP2 Alt	SNP2 MAF	SNP2 Minor Allele	Population	R-squared	D'	Distance
[truncated: 22,825 more rows]

[truncated: 7 more sheets: LD_set.bed, Most_sig_per_locus, Bca_risk_span.bed, large_regions_for_enrich.bed, count overlap numbers, Coetzee_h3k27ac_CRV, intersect_3_H3K27Ac_CRV]
