# Supplementary material for: MCF-7 as a Model for Functional Analysis of Breast Cancer Risk Variants
Source: Oxford University Press journal article supplement (doi:10.1158/1055-9965.epi-19-0066), 2019-07-10
Supplement: 10559965epi190066-sup-215405_2_supp_5578316_pswjj9.xlsx [file 10559965epi190066-sup-215405_2_supp_5578316_pswjj9.xlsx]

## Sheet: Coetzee_H3k27ac_IDR850_output
#chrom string	chromStart int	chromEnd int	name string	score int	strand	signalValue	p-value	q-value	summit	localIDR	globalIDR	rep1_chromStart	rep1_chromEnd	rep1_signalValue	rep1_summit	rep2_chromStart	rep2_chromEnd	rep2_signalValue	rep2_summit
chr1	12948	13935	.	977	.	-1	38.2257	-1	715	1.16	2.35	13354	13866	16.1336	270	12948	13935	38.2257	754
chr1	28503	29889	.	1000	.	-1	444.481	-1	690	5	5	28696	29889	220.359	510	28503	29866	444.481	677
chr1	441017	443376	.	1000	.	-1	83.6747	-1	1060	3.28	4.41	441017	442566	42.4283	1041	441164	443376	83.6747	932
chr1	458111	461856	.	1000	.	-1	182.765	-1	2093	5	5	458130	461730	104.968	2084	458111	461856	182.765	2084
chr1	521512	525048	.	1000	.	-1	178.798	-1	1980	5	5	522244	524732	77.0047	985	521512	525048	178.798	2244
chr1	539715	541860	.	1000	.	-1	71.2061	-1	1056	2.75	3.92	540329	541729	32.5329	300	539715	541860	71.2061	1199
chr1	713012	715995	.	1000	.	-1	234.826	-1	821	5	5	713328	715706	84.5999	359	713012	715995	234.826	820
chr1	761921	763603	.	1000	.	-1	238.527	-1	846	5	5	762163	763531	69.7847	591	761921	763603	238.527	860
chr1	839315	840695	.	1000	.	-1	77.171	-1	594	2.85	4	839603	840695	30.3053	286	839315	840679	77.171	614
chr1	858699	861491	.	1000	.	-1	130.523	-1	1624	4.84	5	858973	861225	72.6543	1160	858699	861491	130.523	1815
chr1	875718	878424	.	1000	.	-1	43.1458	-1	404	1.48	2.67	875718	878072	24.1967	311	875780	878424	43.1458	435
chr1	893538	895023	.	1000	.	-1	115.151	-1	935	3.84	4.94	894093	894670	38.8298	369	893538	895023	115.151	947
chr1	901225	903100	.	1000	.	-1	353.453	-1	878	5	5	901306	902828	122.655	780	901225	903100	353.453	895
chr1	910816	912817	.	1000	.	-1	173.839	-1	920	4.69	5	911343	912376	43.9085	385	910816	912817	173.839	928
chr1	933731	937649	.	1000	.	-1	385.474	-1	1803	5	5	933872	937588	169.66	1374	933731	937649	385.474	2091
chr1	948146	950683	.	1000	.	-1	51.869	-1	848	1.89	3.08	948317	949806	23.4582	690	948146	950683	51.869	836
chr1	954936	957925	.	1000	.	-1	374.032	-1	834	5	5	954943	957316	131.223	788	954936	957925	374.032	873
chr1	959259	961002	.	1000	.	-1	60.9456	-1	1153	2.03	3.22	960241	960622	20.2031	141	959259	961002	60.9456	1184
chr1	994367	995534	.	1000	.	-1	88.4987	-1	490	2.27	3.44	994529	995481	20.2031	306	994367	995534	88.4987	512
chr1	999084	1000365	.	991	.	-1	50.5999	-1	499	1.19	2.39	999371	1000163	13.974	226	999084	1000365	50.5999	485
chr1	1002531	1006788	.	1000	.	-1	130.826	-1	1906	3.56	4.68	1002955	1005911	31.4278	1042	1002531	1006788	130.826	1395
chr1	1007022	1011051	.	1000	.	-1	236.649	-1	2484	5	5	1007625	1010533	74.4908	1905	1007022	1011051	236.649	2460
chr1	1013260	1016955	.	1000	.	-1	303.067	-1	2169	5	5	1014260	1016704	91.9395	1169	1013260	1016955	303.067	2170
chr1	1049869	1052457	.	1000	.	-1	236.776	-1	1458	5	5	1050608	1052362	82.8875	457	1049869	1052457	236.776	1449
chr1	1092874	1094485	.	1000	.	-1	360.7	-1	482	5	5	1092935	1094290	113.564	482	1092874	1094485	360.7	421
chr1	1097344	1101714	.	1000	.	-1	321.479	-1	1185	5	5	1097638	1101047	84.3724	871	1097344	1101714	321.479	1206
chr1	1165876	1167571	.	1000	.	-1	359.395	-1	1341	5	5	1166492	1167446	129.716	740	1165876	1167571	359.395	1327
chr1	1167661	1168507	.	1000	.	-1	57.0169	-1	334	1.39	2.58	1167670	1168145	15.0782	333	1167661	1168507	57.0169	327
chr1	1207306	1210089	.	1000	.	-1	274.032	-1	1661	5	5	1207674	1209843	84.3724	522	1207306	1210089	274.032	1549
chr1	1242334	1246417	.	1000	.	-1	260.924	-1	1937	5	5	1242542	1245429	102.603	1733	1242334	1246417	260.924	1934
chr1	1259408	1261565	.	1000	.	-1	277.618	-1	447	5	5	1259590	1261261	69.7847	279	1259408	1261565	277.618	412
chr1	1282698	1285545	.	1000	.	-1	286.669	-1	2446	5	5	1283025	1285407	121.527	520	1282698	1285545	286.669	2451
chr1	1309307	1311734	.	1000	.	-1	438.331	-1	1088	5	5	1309825	1311635	137.103	573	1309307	1311734	438.331	1086
chr1	1333647	1336715	.	1000	.	-1	368.334	-1	876	5	5	1333926	1335804	152.714	391	1333647	1336715	368.334	858
chr1	1341379	1343802	.	1000	.	-1	410.468	-1	1122	5	5	1341564	1343493	147.698	942	1341379	1343802	410.468	1118
chr1	1367744	1369988	.	1000	.	-1	193.837	-1	1263	4.47	5	1368151	1369527	39.5582	194	1367744	1369988	193.837	1317
chr1	1405966	1408758	.	1000	.	-1	99.8965	-1	1066	3.78	4.87	1406274	1408051	46.5012	1016	1405966	1408758	99.8965	809
chr1	1446205	1449070	.	1000	.	-1	349.456	-1	754	5	5	1446505	1448485	119.926	459	1446205	1449070	349.456	749
chr1	1509210	1511527	.	1000	.	-1	395.054	-1	574	5	5	1509354	1511174	132.853	413	1509210	1511527	395.054	592
chr1	1534556	1535364	.	1000	.	-1	53.1453	-1	345	1.98	3.17	1534746	1535364	29.1445	187	1534556	1535353	53.1453	314
chr1	1535550	1536123	.	850	.	-1	32.5344	-1	223	0.87	2.05	1535603	1535848	17.0799	148	1535550	1536123	32.5344	245
chr1	1548764	1552221	.	1000	.	-1	533.156	-1	2244	5	5	1549493	1551998	236.883	1529	1548764	1552221	533.156	2231
chr1	1589266	1591790	.	1000	.	-1	369.649	-1	1325	5	5	1589626	1591447	166.244	323	1589266	1591790	369.649	1309
chr1	1607063	1611266	.	1000	.	-1	94.3389	-1	713	2.95	4.09	1607587	1610896	26.8331	202	1607063	1611266	94.3389	734
chr1	1622275	1625512	.	1000	.	-1	481.946	-1	1825	5	5	1622928	1625365	211.636	1151	1622275	1625512	481.946	1846
chr1	1654347	1656761	.	1000	.	-1	223.997	-1	1693	5	5	1654880	1656658	66.3286	1109	1654347	1656761	223.997	1744
chr1	1669863	1672232	.	1000	.	-1	104.039	-1	815	2.98	4.12	1670276	1671740	25.6955	525	1669863	1672232	104.039	693
chr1	1675464	1679143	.	1000	.	-1	480.574	-1	2208	5	5	1675975	1678771	216.59	1700	1675464	1679143	480.574	2206
chr1	1689053	1691574	.	1000	.	-1	155.894	-1	1382	4.36	5	1689400	1691417	40.0857	696	1689053	1691574	155.894	1722
chr1	1694105	1696912	.	1000	.	-1	87.1269	-1	1354	1.31	2.5	1694739	1696356	15.0782	166	1694105	1696912	87.1269	1437
chr1	1708203	1711518	.	1000	.	-1	325.185	-1	1929	5	5	1708696	1711031	118.329	1428	1708203	1711518	325.185	1937
chr1	1789636	1791971	.	1000	.	-1	102.719	-1	1003	3.13	4.27	1789636	1791656	27.9829	578	1789661	1791971	102.719	936
chr1	1820968	1823624	.	1000	.	-1	207.398	-1	1171	5	5	1821243	1823301	115.148	903	1820968	1823624	207.398	1164
chr1	1839759	1841491	.	1000	.	-1	130.523	-1	595	3.67	4.77	1840162	1841220	32.6975	192	1839759	1841491	130.523	603
chr1	1980717	1983193	.	1000	.	-1	301.237	-1	695	5	5	1980906	1982735	82.8875	382	1980717	1983193	301.237	667
chr1	2120521	2122675	.	1000	.	-1	197.211	-1	903	5	5	2120703	2122062	59.9457	224	2120521	2122675	197.211	904
chr1	2125236	2127568	.	1000	.	-1	193.598	-1	1217	5	5	2125803	2127090	58.361	635	2125236	2127568	193.598	1232
chr1	2158157	2159165	.	1000	.	-1	314.091	-1	787	5	5	2158347	2159134	144.373	602	2158157	2159165	314.091	782
chr1	2160147	2162053	.	1000	.	-1	41.4191	-1	455	1.3	2.5	2160192	2161162	26.8331	122	2160147	2162053	41.4191	743
chr1	2245957	2247017	.	1000	.	-1	125.87	-1	515	4.05	5	2246046	2246756	40.0857	486	2245957	2247017	125.87	455
chr1	2321854	2324528	.	1000	.	-1	236.764	-1	1553	5	5	2322300	2323892	97.9771	341	2321854	2324528	236.764	1552
chr1	2335350	2337398	.	1000	.	-1	55.7194	-1	1110	1.65	2.84	2335876	2337131	17.0799	162	2335350	2337398	55.7194	1155
chr1	2342999	2346386	.	1000	.	-1	387.386	-1	1591	5	5	2343139	2346386	119.159	550	2342999	2346377	387.386	1611
chr1	2456966	2458476	.	1000	.	-1	130.523	-1	524	4.15	5	2457123	2458248	40.984	365	2456966	2458476	130.523	527
chr1	2475917	2479934	.	1000	.	-1	330.151	-1	2131	5	5	2477140	2479566	119.926	252	2475917	2479934	330.151	2127
chr1	2516509	2519457	.	1000	.	-1	270.44	-1	1178	5	5	2516787	2519121	84.3724	923	2516509	2519457	270.44	1156
chr1	2573377	2574815	.	1000	.	-1	268.648	-1	1074	5	5	2573736	2574688	75.5486	257	2573377	2574815	268.648	1047
chr1	3369992	3372436	.	1000	.	-1	312.249	-1	1374	5	5	3370149	3372330	97.9338	484	3369992	3372436	312.249	1386
chr1	3397998	3400175	.	1000	.	-1	67.6343	-1	596	2.43	3.58	3398190	3399736	24.5704	378	3397998	3400175	67.6343	623
chr1	3447047	3447972	.	1000	.	-1	89.3079	-1	719	3.49	4.61	3447310	3447971	45.2006	454	3447047	3447972	89.3079	721
chr1	3540709	3542507	.	1000	.	-1	133.644	-1	1077	3.39	4.52	3540875	3542224	29.1445	253	3540709	3542507	133.644	1092
chr1	3565951	3566695	.	1000	.	-1	81.5674	-1	500	2.79	3.96	3566148	3566596	26.8331	296	3565951	3566695	81.5674	507
chr1	3688548	3689785	.	886	.	-1	34.8282	-1	614	0.94	2.13	3688695	3689479	13.974	140	3688548	3689785	34.8282	937
chr1	3712039	3713854	.	1000	.	-1	133.636	-1	904	4.36	5	3712462	3713474	45.2006	474	3712039	3713854	133.636	911
chr1	3772876	3774711	.	1000	.	-1	116.67	-1	742	2.58	3.74	3773312	3774601	22.3593	283	3772876	3774711	116.67	722
chr1	3815889	3818102	.	1000	.	-1	212.517	-1	1358	5	5	3816227	3817872	75.5486	1086	3815889	3818102	212.517	1293
chr1	6051404	6053498	.	1000	.	-1	314.091	-1	817	5	5	6051601	6053070	104.155	380	6051404	6053498	314.091	833
chr1	6118274	6120667	.	1000	.	-1	63.6002	-1	723	2.48	3.64	6118581	6119150	31.5021	401	6118274	6120667	63.6002	738
chr1	6217170	6217982	.	1000	.	-1	40.7255	-1	517	1.32	2.52	6217534	6217908	18.1055	215	6217170	6217982	40.7255	455
chr1	6258450	6260526	.	1000	.	-1	334.483	-1	994	5	5	6258939	6260334	110.409	335	6258450	6260526	334.483	1003
chr1	6264603	6266835	.	1000	.	-1	126.727	-1	1291	4.41	5	6264755	6266630	50.4529	434	6264603	6266835	126.727	1293
chr1	6294598	6296794	.	1000	.	-1	147.869	-1	1180	5	5	6294797	6296641	84.3724	246	6294598	6296794	147.869	1177
chr1	6445062	6446911	.	1000	.	-1	49.3383	-1	1165	1.81	2.99	6445410	6446430	24.8543	737	6445062	6446911	49.3383	1246
chr1	6452784	6454591	.	1000	.	-1	210.815	-1	932	4.85	5	6452784	6454557	43.9085	334	6452818	6454591	210.815	898
chr1	6484798	6485829	.	912	.	-1	34.8282	-1	283	1.01	2.2	6484884	6485401	18.1055	184	6484798	6485829	34.8282	297
chr1	6489849	6492350	.	1000	.	-1	95.7959	-1	1216	3.06	4.2	6490104	6491607	27.9829	187	6489849	6492350	95.7959	1237
chr1	6550066	6551224	.	987	.	-1	44.19	-1	730	1.18	2.38	6550165	6551120	14.1034	618	6550066	6551224	44.19	743
chr1	6613635	6615067	.	1000	.	-1	205.963	-1	831	5	5	6613999	6614661	94.9176	477	6613635	6615067	205.963	822
chr1	6639688	6641269	.	1000	.	-1	103.151	-1	575	3.29	4.42	6640020	6640423	30.3177	219	6639688	6641269	103.151	600
chr1	6661252	6663461	.	1000	.	-1	78.6407	-1	1387	2.53	3.69	6661799	6662962	23.4582	743	6661252	6663461	78.6407	1484
chr1	6671949	6676075	.	1000	.	-1	303.067	-1	2011	5	5	6672657	6675700	108.839	481	6671949	6676075	303.067	2599
chr1	6684665	6686296	.	1000	.	-1	98.7241	-1	875	3.29	4.41	6685010	6685952	31.5021	440	6684665	6686296	98.7241	965
chr1	6760880	6762377	.	1000	.	-1	221.131	-1	846	5	5	6761209	6761920	54.4762	502	6760880	6762377	221.131	861
chr1	6843719	6845217	.	1000	.	-1	209.105	-1	721	5	5	6844079	6845119	79.6594	370	6843719	6845217	209.105	712
chr1	7324896	7327099	.	854	.	-1	34.8282	-1	1192	0.88	2.06	7325474	7326224	13.0753	166	7324896	7327099	34.8282	1231
chr1	7608572	7610859	.	1000	.	-1	84.2772	-1	689	2.69	3.85	7609086	7609416	24.5704	170	7608572	7610859	84.2772	695
chr1	7830763	7832122	.	1000	.	-1	119.721	-1	776	2.6	3.76	7830963	7831984	22.3593	140	7830763	7832122	119.721	792
chr1	7842998	7845178	.	1000	.	-1	195.523	-1	1565	3.23	4.36	7843251	7844779	27.9829	230	7842998	7845178	195.523	1581
chr1	8013568	8014863	.	1000	.	-1	144.683	-1	763	4.49	5	8013753	8014773	45.2006	339	8013568	8014863	144.683	1002
chr1	8020636	8022942	.	1000	.	-1	265.057	-1	1259	5	5	8020941	8022619	96.4448	315	8020636	8022942	265.057	1263
chr1	8085155	8087074	.	1000	.	-1	163.599	-1	960	5	5	8085394	8086842	72.6543	783	8085155	8087074	163.599	899
chr1	8129821	8131531	.	1000	.	-1	157.51	-1	969	5	5	8130073	8131484	56.1622	730	8129821	8131531	157.51	957
chr1	8483130	8484910	.	1000	.	-1	67.6343	-1	961	2.66	3.82	8483492	8484521	33.9036	167	8483130	8484910	67.6343	1001
chr1	8761394	8764067	.	1000	.	-1	293.936	-1	1715	5	5	8761675	8763833	102.603	1486	8761394	8764067	293.936	1663
chr1	8876740	8878580	.	1000	.	-1	221.131	-1	986	5	5	8876740	8878357	78.4668	1312	8876768	8878580	221.131	633
chr1	8931101	8941296	.	1000	.	-1	389.839	-1	7680	5	5	8932053	8940753	225.999	689	8931101	8941296	389.839	7428
chr1	8962601	8965276	.	1000	.	-1	94.6117	-1	1894	3.52	4.64	8963130	8964921	39.582	488	8962601	8965276	94.6117	1891
chr1	9186959	9190120	.	1000	.	-1	168.907	-1	2043	5	5	9187017	9189893	58.5674	1063	9186959	9190120	168.907	2031
chr1	9240926	9243493	.	1000	.	-1	234.642	-1	1328	5	5	9241123	9243342	78.4668	409	9240926	9243493	234.642	1334
chr1	9294311	9295911	.	1000	.	-1	82.8601	-1	654	3.16	4.3	9294816	9295825	36.3468	153	9294311	9295911	82.8601	651
chr1	9352246	9354512	.	1000	.	-1	136.78	-1	1244	4.08	5	9352624	9353884	38.3689	805	9352246	9354512	136.78	1305
chr1	9359328	9361616	.	1000	.	-1	45.5991	-1	732	1.48	2.66	9359737	9361260	17.0799	426	9359328	9361616	45.5991	629
chr1	9404488	9406223	.	1000	.	-1	51.869	-1	1262	1.21	2.42	9404992	9406052	14.1034	667	9404488	9406223	51.869	1354
chr1	9488396	9489894	.	1000	.	-1	57.7394	-1	660	2.23	3.4	9488559	9489660	30.3177	272	9488396	9489894	57.7394	942
chr1	9599506	9600501	.	1000	.	-1	138.353	-1	307	4.27	5	9599506	9600501	41.3509	316	9599515	9600439	138.353	290
chr1	9648848	9650054	.	1000	.	-1	54.4289	-1	527	1.88	3.06	9648925	9649669	20.2031	444	9648848	9650054	54.4289	533
chr1	9882630	9884100	.	1000	.	-1	116.67	-1	1274	4.44	5	9882741	9884078	69.7847	1158	9882630	9884100	116.67	1279
chr1	9884215	9886300	.	1000	.	-1	78.6407	-1	238	1.94	3.13	9884289	9886213	18.1055	204	9884215	9886300	78.6407	222
chr1	9902718	9904326	.	1000	.	-1	54.4289	-1	644	1.49	2.68	9903064	9903673	15.8215	341	9902718	9904326	54.4289	602
chr1	9969192	9970397	.	1000	.	-1	112.125	-1	779	3.93	5	9969607	9970325	42.6253	388	9969192	9970397	112.125	755
chr1	9970634	9971655	.	1000	.	-1	103.151	-1	443	2.42	3.58	9970745	9971302	21.2741	355	9970634	9971655	103.151	421
chr1	10002465	10004295	.	1000	.	-1	164.003	-1	805	5	5	10002690	10004134	66.2051	558	10002465	10004295	164.003	828
chr1	10009751	10012622	.	1000	.	-1	103.151	-1	1306	2.83	3.98	10010749	10011746	24.5704	210	10009751	10012622	103.151	1306
chr1	10092036	10096163	.	1000	.	-1	199.85	-1	1159	5	5	10092336	10095880	66.9404	282	10092036	10096163	199.85	1159
chr1	10269711	10272135	.	1000	.	-1	103.145	-1	1047	3.88	4.97	10269954	10271563	47.8102	500	10269711	10272135	103.145	505
chr1	10458355	10460232	.	1000	.	-1	328.899	-1	917	5	5	10458485	10459998	111.984	237	10458355	10460232	328.899	942
chr1	10490102	10491558	.	1000	.	-1	116.67	-1	508	3.94	5	10490118	10491287	40.6866	524	10490102	10491558	116.67	476
chr1	10534380	10535968	.	1000	.	-1	210.815	-1	756	5	5	10534518	10535621	53.8301	178	10534380	10535968	210.815	766
chr1	10567728	10574135	.	1000	.	-1	268.648	-1	4020	5	5	10568423	10573091	58.5674	855	10567728	10574135	268.648	4035
chr1	10595877	10599012	.	1000	.	-1	55.7194	-1	1367	1.43	2.62	10596226	10598278	15.0782	305	10595877	10599012	55.7194	1365
chr1	10615825	10617180	.	1000	.	-1	155.894	-1	275	3.89	4.98	10615900	10616813	33.9036	173	10615825	10617180	155.894	302
chr1	10752893	10754585	.	938	.	-1	57.0169	-1	1142	1.07	2.26	10753649	10754194	13.1468	374	10752893	10754585	57.0169	1155
chr1	10758517	10760093	.	950	.	-1	38.4412	-1	701	1.1	2.29	10758649	10759722	14.3025	541	10758517	10760093	38.4412	729
chr1	10838694	10840478	.	962	.	-1	40.7255	-1	1191	1.12	2.32	10838849	10840196	14.1034	327	10838694	10840478	40.7255	1031
chr1	10853216	10857155	.	1000	.	-1	154.274	-1	3293	4.98	5	10853331	10857116	54.4762	1653	10853216	10857155	154.274	3292
chr1	10864146	10865016	.	1000	.	-1	46.8377	-1	236	1.63	2.83	10864217	10864974	20.2031	176	10864146	10865016	46.8377	225
chr1	10895563	10896115	.	1000	.	-1	62.2742	-1	305	1.26	2.46	10895695	10896049	14.1034	171	10895563	10896115	62.2742	308
chr1	10959609	10962620	.	1000	.	-1	180.458	-1	895	5	5	10959609	10962487	51.7862	375	10959737	10962620	180.458	1012
chr1	11071735	11073699	.	1000	.	-1	408.517	-1	1174	5	5	11072012	11073267	129.596	301	11071735	11073699	408.517	1148
chr1	11118638	11120061	.	1000	.	-1	159.128	-1	1183	5	5	11119211	11120021	64.1222	616	11118638	11120061	159.128	1177
chr1	11120190	11121262	.	1000	.	-1	155.894	-1	298	5	5	11120241	11120948	74.0984	259	11120190	11121262	155.894	286
chr1	11158935	11160715	.	1000	.	-1	286.669	-1	783	5	5	11159191	11160426	105.712	521	11158935	11160715	286.669	789
chr1	11321874	11323416	.	1000	.	-1	147.846	-1	563	4.35	5	11322091	11323271	41.3509	232	11321874	11323416	147.846	576
chr1	11333106	11334565	.	1000	.	-1	306.734	-1	299	5	5	11333196	11333940	111.984	215	11333106	11334565	306.734	294
chr1	11538659	11539845	.	1000	.	-1	343.827	-1	392	5	5	11538840	11539671	159.451	213	11538659	11539845	343.827	391
chr1	11740515	11741955	.	1000	.	-1	88.5594	-1	606	3.24	4.37	11740539	11741955	33.9036	184	11740515	11741900	88.5594	601
chr1	11795890	11797355	.	1000	.	-1	98.7241	-1	526	3.56	4.68	11796167	11797212	37.5834	179	11795890	11797355	98.7241	596
chr1	11862401	11864163	.	1000	.	-1	75.8549	-1	1081	3.04	4.18	11863307	11864116	43.9085	122	11862401	11864163	75.8549	1074
chr1	11864632	11867377	.	1000	.	-1	261.501	-1	1437	5	5	11865191	11866885	91.0229	372	11864632	11867377	261.501	1115
chr1	11967703	11970770	.	1000	.	-1	375.935	-1	397	5	5	11967903	11970342	154.393	202	11967703	11970770	375.935	392
chr1	11984677	11987132	.	1000	.	-1	77.245	-1	1508	2.86	4.01	11985271	11986958	30.3177	297	11984677	11987132	77.245	1483
chr1	11994135	11995356	.	1000	.	-1	77.245	-1	738	3.01	4.16	11994284	11995107	36.3468	599	11994135	11995356	77.245	729
chr1	12039804	12041516	.	1000	.	-1	200.979	-1	735	5	5	12040225	12041016	52.4978	419	12039804	12041516	200.979	631
chr1	12079430	12080337	.	1000	.	-1	107.072	-1	312	2.95	4.09	12079548	12080009	25.661	194	12079430	12080337	107.072	312
chr1	12289990	12291699	.	1000	.	-1	193.837	-1	276	5	5	12290056	12291301	59.9457	171	12289990	12291699	193.837	316
chr1	14026035	14027276	.	1000	.	-1	82.8601	-1	516	3.06	4.2	14026263	14027173	32.6975	298	14026035	14027276	82.8601	507
chr1	14075095	14076835	.	1000	.	-1	155.866	-1	1138	4.85	5	14075257	14076572	50.4529	322	14075095	14076835	155.866	1166
chr1	15478978	15480931	.	1000	.	-1	102.719	-1	458	3.36	4.48	15479021	15480730	31.6206	337	15478978	15480931	102.719	440
chr1	15735949	15737130	.	1000	.	-1	66.2849	-1	427	2.2	3.38	15735962	15737130	21.2741	188	15735949	15737122	66.2849	653
chr1	15850119	15854121	.	1000	.	-1	243.793	-1	3396	5	5	15850346	15853961	74.5179	177	15850119	15854121	243.793	3380
chr1	15910900	15911808	.	861	.	-1	34.8282	-1	488	0.9	2.07	15911098	15911662	23.4582	163	15910900	15911808	34.8282	616
chr1	15928767	15930649	.	1000	.	-1	122.737	-1	1343	3.02	4.17	15929652	15930554	25.6955	204	15928767	15930649	122.737	1089
chr1	15942362	15946319	.	1000	.	-1	385.474	-1	1915	5	5	15943331	15946021	110.409	213	15942362	15946319	385.474	1892
chr1	16010072	16011677	.	1000	.	-1	224.59	-1	528	5	5	16010226	16011502	71.2164	268	16010072	16011677	224.59	531
chr1	16158376	16163494	.	1000	.	-1	537.644	-1	3527	5	5	16158821	16163223	247.86	992	16158376	16163494	537.644	3448
chr1	16172934	16177467	.	1000	.	-1	210.815	-1	1335	5	5	16173365	16176786	85.8628	519	16172934	16177467	210.815	1720
chr1	16212050	16214456	.	1000	.	-1	160.423	-1	687	4.07	5	16212358	16213498	36.0174	272	16212050	16214456	160.423	676
chr1	16301576	16303310	.	1000	.	-1	110.619	-1	846	4.19	5	16302063	16302869	57.1963	371	16301576	16303310	110.619	834
chr1	16469726	16472488	.	870	.	-1	40.7255	-1	1132	0.91	2.1	16470176	16472276	12.2094	360	16469726	16472488	40.7255	1035
chr1	16480675	16482685	.	1000	.	-1	68.9897	-1	1548	2	3.19	16481169	16482524	18.8588	1094	16480675	16482685	68.9897	1509
chr1	16493640	16494762	.	1000	.	-1	173.829	-1	654	5	5	16493702	16494534	51.7862	532	16493640	16494762	173.829	715
chr1	16499412	16503851	.	1000	.	-1	145.148	-1	2848	4.39	5	16499412	16503547	42.6253	351	16499429	16503851	145.148	2881
chr1	16532401	16533058	.	1000	.	-1	49.3383	-1	462	1.78	2.96	16532653	16533034	22.3593	228	16532401	16533058	49.3383	444
chr1	16533142	16534191	.	1000	.	-1	159.128	-1	294	4.62	5	16533221	16533952	44.7516	209	16533142	16534191	159.128	300
chr1	16537723	16540109	.	1000	.	-1	151.069	-1	1243	4.32	5	16537872	16539602	40.0857	1125	16537723	16540109	151.069	1212
chr1	16562361	16564598	.	1000	.	-1	275.639	-1	1144	5	5	16562565	16564102	84.3294	933	16562361	16564598	275.639	1152
chr1	16677692	16679706	.	1000	.	-1	284.452	-1	1105	5	5	16678134	16679694	88.7408	686	16677692	16679706	284.452	1082
chr1	16692809	16695056	.	1000	.	-1	348.88	-1	1112	5	5	16693132	16694875	153.373	205	16692809	16695056	348.88	1140
chr1	16766458	16767979	.	1000	.	-1	125.862	-1	922	3.87	4.97	16766804	16767655	36.3468	527	16766458	16767979	125.862	972
chr1	16824920	16826686	.	1000	.	-1	59.0124	-1	889	1.86	3.05	16825134	16826272	18.7088	426	16824920	16826686	59.0124	1138
chr1	16839093	16841859	.	1000	.	-1	524.884	-1	1805	5	5	16839495	16841696	326.695	1407	16839093	16841859	524.884	1801
chr1	16934948	16935677	.	1000	.	-1	58.6331	-1	229	1.83	3.02	16935020	16935347	18.1526	180	16934948	16935677	58.6331	207
chr1	16938912	16940630	.	1000	.	-1	373.479	-1	1018	5	5	16939262	16940453	146.817	663	16938912	16940630	373.479	1024
chr1	16970191	16972177	.	1000	.	-1	315.091	-1	1005	5	5	16970578	16971788	154.703	796	16970191	16972177	315.091	828
chr1	16983073	16984415	.	1000	.	-1	84.5341	-1	629	2.53	3.69	16983302	16983874	22.4888	392	16983073	16984415	84.5341	638
chr1	16991806	16994726	.	1000	.	-1	551.602	-1	1770	5	5	16992133	16994379	377.849	1424	16991806	16994726	551.602	762
chr1	17033664	17035154	.	1000	.	-1	158.665	-1	670	4.69	5	17033775	17034985	46.4382	372	17033664	17035154	158.665	858
chr1	17042888	17044492	.	1000	.	-1	52.0234	-1	657	1.71	2.9	17043372	17043927	18.5142	183	17042888	17044492	52.0234	647
chr1	17065915	17068334	.	1000	.	-1	586.441	-1	944	5	5	17066034	17068334	371.441	535	17065915	17068300	586.441	932
chr1	17076058	17077367	.	1000	.	-1	83.208	-1	654	2	3.19	17076487	17077166	18.2091	228	17076058	17077367	83.208	652
chr1	17221264	17224027	.	1000	.	-1	531.023	-1	1095	5	5	17221523	17223574	361.403	836	17221264	17224027	531.023	1096
chr1	17230096	17232292	.	1000	.	-1	479.894	-1	1451	5	5	17230299	17231816	307.735	1269	17230096	17232292	479.894	1431
chr1	17239909	17241802	.	1000	.	-1	240.28	-1	985	5	5	17240050	17241527	102.603	215	17239909	17241802	240.28	985
chr1	17337695	17338453	.	905	.	-1	34.8282	-1	442	0.99	2.18	17337962	17338419	15.0782	159	17337695	17338453	34.8282	458
chr1	17379771	17381431	.	1000	.	-1	97.2577	-1	616	3.27	4.4	17380083	17381226	31.5021	236	17379771	17381431	97.2577	630
chr1	17732105	17734198	.	1000	.	-1	67.6343	-1	1002	2.05	3.25	17732860	17734080	19.2474	149	17732105	17734198	67.6343	1066
chr1	17735623	17740933	.	1000	.	-1	121.252	-1	3643	3.39	4.51	17737641	17740668	29.7815	272	17735623	17740933	121.252	3776
chr1	17763494	17769824	.	1000	.	-1	364.545	-1	1512	5	5	17763667	17769237	110.409	738	17763494	17769824	364.545	1566
chr1	17798914	17803816	.	1000	.	-1	82.8601	-1	3850	3.11	4.25	17799788	17803380	33.9036	246	17798914	17803816	82.8601	3847
chr1	17844796	17849679	.	1000	.	-1	221.131	-1	1717	5	5	17845696	17848432	82.8875	808	17844796	17849679	221.131	1726
chr1	17849826	17857544	.	1000	.	-1	107.619	-1	1503	3.4	4.53	17850240	17857465	31.5021	315	17849826	17857544	107.619	1418
chr1	17863814	17868367	.	1000	.	-1	275.83	-1	2712	5	5	17864464	17867602	85.8628	217	17863814	17868367	275.83	2734
chr1	17885201	17889119	.	1000	.	-1	67.6343	-1	1915	1.4	2.59	17885859	17888622	15.0782	691	17885201	17889119	67.6343	1015
chr1	19228484	19231063	.	1000	.	-1	245.553	-1	696	5	5	19228578	19230629	106.187	596	19228484	19231063	245.553	702
chr1	19336057	19338832	.	1000	.	-1	93.077	-1	1475	3.68	4.78	19336556	19338562	53.1274	616	19336057	19338832	93.077	1494
chr1	19535462	19537895	.	1000	.	-1	182.12	-1	1152	5	5	19536173	19537549	54.4762	406	19535462	19537895	182.12	1187
chr1	19577423	19579520	.	1000	.	-1	442.321	-1	736	5	5	19577495	19579152	181.721	658	19577423	19579520	442.321	742
chr1	19637618	19639506	.	1000	.	-1	193.837	-1	820	5	5	19638047	19639442	62.7232	349	19637618	19639506	193.837	793
chr1	19810585	19813434	.	1000	.	-1	395.054	-1	1275	5	5	19810993	19813122	151.038	523	19810585	19813434	395.054	1278
chr1	19921795	19924733	.	1000	.	-1	308.57	-1	1894	5	5	19922775	19924325	85.8628	877	19921795	19924733	308.57	1931
chr1	20125580	20127206	.	1000	.	-1	110.619	-1	860	3.92	5	20125744	20127165	43.039	507	20125580	20127206	110.619	1050
chr1	20208745	20210034	.	1000	.	-1	152.674	-1	317	5	5	20208872	20209513	77.0047	194	20208745	20210034	152.674	314
chr1	20833985	20835082	.	1000	.	-1	53.1453	-1	509	1.96	3.15	20834130	20835036	24.5595	233	20833985	20835082	53.1453	524
chr1	20959841	20960966	.	1000	.	-1	74.4703	-1	415	2.92	4.06	20959894	20960444	35.1201	387	20959841	20960966	74.4703	391
chr1	20987098	20988957	.	1000	.	-1	188.798	-1	1211	5	5	20987345	20988803	60.3385	289	20987098	20988957	188.798	1198
chr1	21022971	21023988	.	1000	.	-1	71.7184	-1	269	2.45	3.6	21023086	21023913	23.4582	138	21022971	21023988	71.7184	286
chr1	21111976	21114704	.	1000	.	-1	410.468	-1	1625	5	5	21112433	21114567	144.373	1181	21111976	21114704	410.468	1613
chr1	21348067	21350063	.	1000	.	-1	58.3212	-1	1087	1.65	2.85	21348909	21349605	16.7788	232	21348067	21350063	58.3212	1100
chr1	21502034	21503958	.	1000	.	-1	80.0418	-1	1072	2.96	4.1	21502180	21503901	31.5021	415	21502034	21503958	80.0418	1251
chr1	21576834	21580634	.	1000	.	-1	146.274	-1	1783	3.87	4.96	21577596	21580089	33.9036	335	21576834	21580634	146.274	2301
chr1	21649165	21654085	.	1000	.	-1	78.6407	-1	1517	2.53	3.69	21650234	21651863	23.4582	539	21649165	21654085	78.6407	1426
chr1	21655272	21657569	.	1000	.	-1	50.0462	-1	1135	1.63	2.83	21656213	21656568	18.1055	186	21655272	21657569	50.0462	1143
chr1	21660643	21668240	.	1000	.	-1	75.3531	-1	1561	2.39	3.55	21660857	21667155	22.3593	339	21660643	21668240	75.3531	1555
chr1	21670650	21673038	.	1000	.	-1	127.417	-1	1189	4.78	5	21671399	21672487	75.5486	442	21670650	21673038	127.417	1187
chr1	21765880	21767422	.	1000	.	-1	98.7241	-1	873	3.69	4.79	21766238	21767267	43.1778	530	21765880	21767422	98.7241	859
chr1	22107707	22110623	.	1000	.	-1	393.301	-1	2245	5	5	22107931	22110559	209.853	2050	22107707	22110623	393.301	2217
chr1	22263940	22264441	.	1000	.	-1	46.8377	-1	203	1.41	2.6	22263981	22264278	16.0706	160	22263940	22264441	46.8377	206
chr1	22351530	22353022	.	1000	.	-1	226.486	-1	635	5	5	22351966	22352761	90.3665	182	22351530	22353022	226.486	652
chr1	22378653	22380526	.	1000	.	-1	306.734	-1	889	5	5	22378776	22380299	121.527	260	22378653	22380526	306.734	875
chr1	22622654	22624841	.	1000	.	-1	49.3383	-1	1325	1.56	2.75	22623304	22624377	17.0799	754	22622654	22624841	49.3383	1247
chr1	22777031	22779627	.	1000	.	-1	241.54	-1	1637	5	5	22777769	22779270	60.8101	297	22777031	22779627	241.54	1643
chr1	23152024	23154370	.	1000	.	-1	58.3212	-1	1227	2.26	3.43	23152624	23154303	30.3177	392	23152024	23154370	58.3212	1236
chr1	23344957	23346999	.	1000	.	-1	304.885	-1	1220	5	5	23345179	23346749	85.8628	314	23344957	23346999	304.885	1232
chr1	23493930	23495394	.	909	.	-1	38.3396	-1	411	1	2.19	23493930	23495317	13.1468	349	23493960	23495394	38.3396	493
chr1	23669398	23672274	.	1000	.	-1	543.307	-1	1132	5	5	23669744	23672038	197.452	775	23669398	23672274	543.307	1144
chr1	23692643	23696692	.	1000	.	-1	302.122	-1	2534	5	5	23692945	23696446	82.5778	558	23692643	23696692	302.122	2559
chr1	23777670	23779634	.	1000	.	-1	57.7394	-1	699	2.1	3.29	23777977	23779197	23.4582	278	23777670	23779634	57.7394	687
chr1	23809908	23811299	.	1000	.	-1	107.619	-1	637	3.09	4.23	23810195	23811190	27.0013	306	23809908	23811299	107.619	606
chr1	23856550	23857836	.	1000	.	-1	125.87	-1	1005	4.62	5	23856734	23857772	61.3309	854	23856550	23857836	125.87	973
chr1	23880406	23890288	.	1000	.	-1	372.114	-1	768	5	5	23880712	23889827	152.714	369	23880406	23890288	372.114	799
chr1	23910252	23914657	.	1000	.	-1	98.3594	-1	2026	3.7	4.8	23911256	23914165	43.9085	319	23910252	23914657	98.3594	2298
chr1	23916655	23922463	.	1000	.	-1	72.0812	-1	3308	2.87	4.02	23916699	23921687	36.3468	623	23916655	23922463	72.0812	3314
chr1	23976837	23978952	.	963	.	-1	55.7194	-1	1076	1.12	2.32	23977467	23978383	13.3636	204	23976837	23978952	55.7194	742
chr1	24017633	24019693	.	1000	.	-1	148.141	-1	889	4.58	5	24018260	24019268	46.0245	250	24017633	24019693	148.141	902
chr1	24069343	24071482	.	1000	.	-1	198.902	-1	795	5	5	24069484	24070738	65.528	652	24069343	24071482	198.902	798
chr1	24104068	24105881	.	1000	.	-1	182.12	-1	996	4.24	5	24104393	24105497	37.1561	212	24104068	24105881	182.12	1019
chr1	24117011	24118649	.	1000	.	-1	68.9897	-1	939	2.38	3.54	24117622	24118364	23.4582	396	24117011	24118649	68.9897	872
chr1	24125887	24128282	.	1000	.	-1	121.851	-1	1032	4.47	5	24126382	24127861	57.1963	464	24125887	24128282	121.851	1106
chr1	24151165	24152618	.	1000	.	-1	163.599	-1	565	5	5	24151383	24152559	61.3309	241	24151165	24152618	163.599	582
chr1	24283808	24288316	.	1000	.	-1	328.899	-1	2692	5	5	24283947	24287464	81.4082	508	24283808	24288316	328.899	2717
chr1	24305771	24308127	.	1000	.	-1	249.081	-1	883	5	5	24306218	24307513	68.3594	326	24305771	24308127	249.081	873
chr1	24344004	24347003	.	1000	.	-1	112.125	-1	1579	3.96	5	24344453	24346480	43.9085	545	24344004	24347003	112.125	1987
chr1	24739586	24740661	.	1000	.	-1	64.9371	-1	482	2.25	3.42	24739769	24740250	22.3944	293	24739586	24740661	64.9371	489
chr1	24828522	24829946	.	1000	.	-1	48.0842	-1	597	1.64	2.83	24828861	24829891	19.1467	225	24828522	24829946	48.0842	588
chr1	24968328	24971006	.	1000	.	-1	351.336	-1	1646	5	5	24968510	24970625	102.603	500	24968328	24971006	351.336	1679
chr1	25031093	25033045	.	1000	.	-1	59.8366	-1	1169	1.51	2.7	25031455	25032950	15.5024	250	25031093	25033045	59.8366	1153
chr1	25069182	25073985	.	1000	.	-1	277.631	-1	3007	5	5	25069862	25073574	65.528	243	25069182	25073985	277.631	3039
chr1	25558374	25560642	.	1000	.	-1	279.421	-1	937	5	5	25558559	25560642	54.7022	506	25558374	25560574	279.421	958
chr1	25565553	25567322	.	1000	.	-1	104.636	-1	991	1.42	2.61	25565933	25566943	16.0706	622	25565553	25567322	104.636	981
chr1	25572752	25574797	.	1000	.	-1	348.797	-1	994	5	5	25573134	25574613	127.974	395	25572752	25574797	348.797	982
chr1	25593414	25594919	.	1000	.	-1	127.155	-1	782	3.24	4.37	25593488	25594421	27.8612	208	25593414	25594919	127.155	799
chr1	25663507	25665864	.	1000	.	-1	193.837	-1	1621	5	5	25664046	25665486	49.1275	449	25663507	25665864	193.837	1540
chr1	25756108	25758381	.	1000	.	-1	128.968	-1	1521	4.55	5	25756405	25758204	54.4762	178	25756108	25758381	128.968	1537
chr1	25869986	25871091	.	1000	.	-1	95.7959	-1	302	3.07	4.21	25870081	25870827	27.9829	218	25869986	25871091	95.7959	291
chr1	25943308	25943935	.	940	.	-1	53.1453	-1	346	1.07	2.26	25943318	25943935	13.1468	471	25943308	25943908	53.1453	212
chr1	26145935	26147801	.	1000	.	-1	314.091	-1	790	5	5	26145981	26147553	96.4448	666	26145935	26147801	314.091	868
chr1	26185165	26187049	.	1000	.	-1	88.5594	-1	540	2.97	4.11	26185275	26186581	27.9829	309	26185165	26187049	88.5594	522
chr1	26231350	26233105	.	1000	.	-1	116.898	-1	1236	3.55	4.66	26232176	26232896	32.6975	511	26231350	26233105	116.898	1136
chr1	26323614	26324689	.	1000	.	-1	87.1269	-1	729	2.94	4.08	26323933	26324538	27.9829	399	26323614	26324689	87.1269	741
chr1	26436971	26439650	.	1000	.	-1	368.334	-1	866	5	5	26437108	26439139	141.062	748	26436971	26439650	368.334	847
chr1	26496049	26497262	.	1000	.	-1	106.125	-1	567	4.03	5	26496386	26496919	53.1274	237	26496049	26497262	106.125	561
chr1	26503538	26505048	.	1000	.	-1	88.5594	-1	607	2.24	3.42	26503591	26504481	20.2031	111	26503538	26505048	88.5594	640
chr1	26560553	26561686	.	1000	.	-1	185.443	-1	432	5	5	26560655	26561611	50.4529	446	26560553	26561686	185.443	316
chr1	26605615	26607276	.	1000	.	-1	124.327	-1	1098	4.4	5	26605960	26606909	51.7862	761	26605615	26607276	124.327	1091
chr1	26757935	26759532	.	1000	.	-1	59.106	-1	547	1.36	2.56	26758287	26759329	14.8288	159	26757935	26759532	59.106	560
chr1	26797418	26800691	.	1000	.	-1	605.306	-1	1755	5	5	26797918	26799960	279.434	666	26797418	26800691	605.306	1779
chr1	26826393	26828929	.	1000	.	-1	431.203	-1	946	5	5	26826540	26828553	179.366	787	26826393	26828929	431.203	958
chr1	26856205	26857019	.	1000	.	-1	109.117	-1	226	3.85	4.95	26856242	26856760	41.3509	187	26856205	26857019	109.117	228
chr1	26946003	26949409	.	1000	.	-1	418.214	-1	1462	5	5	26946446	26949300	169.66	492	26946003	26949409	418.214	1663
chr1	27018383	27025185	.	1000	.	-1	487.688	-1	5037	5	5	27018591	27024681	206.296	1181	27018383	27025185	487.688	5234
chr1	27112965	27115817	.	1000	.	-1	515.033	-1	1574	5	5	27113157	27115658	216.068	483	27112965	27115817	515.033	1574
chr1	27150120	27153924	.	1000	.	-1	109.117	-1	2775	2.62	3.78	27150847	27153792	22.3944	341	27150120	27153924	109.117	2729
chr1	27188032	27193047	.	1000	.	-1	229.798	-1	4034	5	5	27189650	27192818	97.9771	897	27188032	27193047	229.798	4041
chr1	27215750	27217378	.	1000	.	-1	286.669	-1	759	5	5	27215974	27217164	51.7862	464	27215750	27217378	286.669	830
chr1	27226099	27227549	.	1000	.	-1	70.3511	-1	835	2.56	3.72	27226568	27227271	26.4039	565	27226099	27227549	70.3511	636
chr1	27247561	27249208	.	1000	.	-1	219.405	-1	864	5	5	27247751	27248896	87.1804	207	27247561	27249208	219.405	888
chr1	27285923	27287700	.	1000	.	-1	377.439	-1	836	5	5	27286133	27287422	146.033	639	27285923	27287700	377.439	824
chr1	27334121	27339445	.	1000	.	-1	85.6994	-1	2399	2.63	3.79	27334422	27339344	23.4705	292	27334121	27339445	85.6994	2471
chr1	27463009	27473523	.	1000	.	-1	132.429	-1	1565	4.18	5	27463378	27473152	41.3509	499	27463009	27473523	132.429	1585
chr1	27479240	27482719	.	1000	.	-1	212.528	-1	2186	5	5	27480487	27482417	58.5674	274	27479240	27482719	212.528	2189
chr1	27561045	27561808	.	1000	.	-1	89.9969	-1	335	3.42	4.54	27561165	27561704	39.7458	209	27561045	27561808	89.9969	342
chr1	27648159	27649806	.	1000	.	-1	238.514	-1	746	5	5	27648286	27649347	82.0248	155	27648159	27649806	238.514	766
chr1	27667622	27670877	.	1000	.	-1	130.523	-1	1098	4.23	5	27668129	27669985	43.1778	549	27667622	27670877	130.523	1141
chr1	27675129	27676986	.	1000	.	-1	284.857	-1	1091	5	5	27675418	27676986	104.155	796	27675129	27676976	284.857	1097
chr1	27691410	27694188	.	1000	.	-1	209.105	-1	1889	5	5	27692285	27693902	81.4082	1021	27691410	27694188	209.105	1882
chr1	27815498	27817635	.	1000	.	-1	395.054	-1	992	5	5	27815911	27817382	129.596	602	27815498	27817635	395.054	970
chr1	27853676	27855612	.	1000	.	-1	132.546	-1	823	4.63	5	27854057	27855449	54.4762	300	27853676	27855612	132.546	836
chr1	27865808	27870358	.	1000	.	-1	60.95	-1	3768	1.7	2.89	27866310	27870247	17.0799	391	27865808	27870358	60.95	3677
chr1	27901142	27902789	.	1000	.	-1	107.619	-1	958	3.85	4.95	27901256	27902789	42.6253	732	27901142	27902731	107.619	1070
chr1	27927883	27930953	.	1000	.	-1	221.131	-1	1997	5	5	27928446	27930719	58.5674	1409	27927883	27930953	221.131	2023
chr1	27986189	27986968	.	1000	.	-1	51.869	-1	247	1.67	2.86	27986260	27986597	18.1055	152	27986189	27986968	51.869	271
chr1	28052339	28053416	.	1000	.	-1	157.51	-1	370	5	5	28052468	28053217	64.9848	264	28052339	28053416	157.51	348
chr1	28099657	28100466	.	983	.	-1	73.731	-1	302	1.17	2.37	28099742	28100166	14.1034	222	28099657	28100466	73.731	297
chr1	28156437	28158158	.	1000	.	-1	172.192	-1	1078	5	5	28156637	28157931	66.9404	857	28156437	28158158	172.192	1100
chr1	28240361	28241769	.	1000	.	-1	68.9897	-1	532	2.62	3.78	28240467	28241647	29.1445	273	28240361	28241769	68.9897	545
chr1	28285550	28287161	.	1000	.	-1	109.11	-1	1053	3.75	4.85	28285803	28286955	38.8298	812	28285550	28287161	109.11	1042
chr1	28414093	28416104	.	1000	.	-1	118.193	-1	876	4.22	5	28414452	28415750	49.1275	156	28414093	28416104	118.193	840
chr1	28558931	28560233	.	1000	.	-1	88.5535	-1	428	3.49	4.61	28559160	28559551	49.1275	207	28558931	28560233	88.5535	420
chr1	28561725	28563704	.	1000	.	-1	319.149	-1	1083	5	5	28561863	28563685	129.007	284	28561725	28563704	319.149	1116
chr1	28572674	28575883	.	1000	.	-1	107.619	-1	859	3.78	4.87	28573001	28574959	40.0857	294	28572674	28575883	107.619	853
chr1	28585844	28587559	.	1000	.	-1	257.941	-1	366	5	5	28585998	28587249	50.4529	187	28585844	28587559	257.941	392
chr1	28639766	28641677	.	974	.	-1	39.5282	-1	706	1.15	2.35	28639915	28640711	15.0782	169	28639766	28641677	39.5282	637
chr1	28654501	28656570	.	1000	.	-1	190.03	-1	1236	5	5	28654774	28656367	55.7579	929	28654501	28656570	190.03	1270
chr1	28695590	28697806	.	1000	.	-1	250.848	-1	812	5	5	28695766	28697434	71.2164	603	28695590	28697806	250.848	846
chr1	28831520	28837794	.	1000	.	-1	235.015	-1	1250	5	5	28831813	28837794	83.1015	219	28831520	28837602	235.015	1274
chr1	28844187	28847495	.	1000	.	-1	360.762	-1	700	5	5	28844336	28847015	178.259	348	28844187	28847495	360.762	692
chr1	28852010	28855264	.	1000	.	-1	155.894	-1	1277	5	5	28852294	28854217	59.9457	328	28852010	28855264	155.894	1306
chr1	28878823	28880901	.	1000	.	-1	122.787	-1	1041	4.23	5	28878939	28880273	46.5012	257	28878823	28880901	122.787	987
chr1	28907152	28909085	.	1000	.	-1	166.788	-1	1047	5	5	28907378	28908922	75.5486	513	28907152	28909085	166.788	1002
chr1	28968582	28970964	.	1000	.	-1	199.323	-1	1387	5	5	28968582	28970626	65.528	1481	28968640	28970964	199.323	1235
chr1	28973960	28976501	.	1000	.	-1	322.167	-1	1043	5	5	28974026	28976199	117.452	635	28973960	28976501	322.167	1034
chr1	28994057	28996812	.	1000	.	-1	451.408	-1	1731	5	5	28994435	28996508	190.43	426	28994057	28996812	451.408	1736
chr1	29062555	29065047	.	1000	.	-1	337.777	-1	1233	5	5	29062828	29064577	104.697	1003	29062555	29065047	337.777	1191
chr1	29101140	29102714	.	1000	.	-1	133.644	-1	762	4.35	5	29101483	29102471	45.2006	408	29101140	29102714	133.644	774
chr1	29213219	29214357	.	1000	.	-1	41.9315	-1	573	1.38	2.57	29213308	29214243	18.1055	118	29213219	29214357	41.9315	606
chr1	29240940	29241772	.	992	.	-1	38.3396	-1	349	1.19	2.39	29241079	29241483	17.0799	216	29240940	29241772	38.3396	343
chr1	29506825	29509593	.	1000	.	-1	565.699	-1	1351	5	5	29507352	29509416	213.151	486	29506825	29509593	565.699	1372
chr1	29562978	29564321	.	1000	.	-1	46.8377	-1	187	1.32	2.51	29563017	29564251	15.0782	110	29562978	29564321	46.8377	226
chr1	30817819	30818425	.	980	.	-1	54.4289	-1	398	1.16	2.36	30818011	30818348	13.7248	220	30817819	30818425	54.4289	385
chr1	30818681	30819557	.	1000	.	-1	54.4289	-1	475	1.74	2.93	30818782	30819472	18.1055	307	30818681	30819557	54.4289	542
chr1	30852548	30853429	.	898	.	-1	37.1599	-1	658	0.97	2.16	30852973	30853370	26.8331	228	30852548	30853429	37.1599	664
chr1	31191469	31192330	.	1000	.	-1	200.595	-1	390	5	5	31191620	31192154	49.1275	278	31191469	31192330	200.595	351
chr1	31295999	31297911	.	1000	.	-1	119.721	-1	1227	4.55	5	31296455	31297758	74.8192	760	31295999	31297911	119.721	1238
chr1	31536480	31539267	.	1000	.	-1	222.859	-1	1559	5	5	31536820	31539133	61.903	409	31536480	31539267	222.859	1540
chr1	31624203	31628828	.	1000	.	-1	261.501	-1	3716	5	5	31624578	31628791	97.9771	621	31624203	31628828	261.501	3411
chr1	31642988	31647374	.	1000	.	-1	100.094	-1	1997	3.79	4.88	31642988	31647232	46.5012	1079	31643023	31647374	100.094	1931
chr1	31768879	31770743	.	1000	.	-1	178.193	-1	548	5	5	31769128	31770315	62.7232	244	31768879	31770743	178.193	545
chr1	31885558	31887127	.	1000	.	-1	106.125	-1	711	3.72	4.82	31886069	31886969	38.8298	212	31885558	31887127	106.125	699
chr1	31943775	31945794	.	852	.	-1	53.5091	-1	1124	0.87	2.05	31944712	31944957	12.2094	150	31943775	31945794	53.5091	1162
chr1	31947551	31951498	.	1000	.	-1	247.316	-1	2722	5	5	31949286	31951159	46.5012	397	31947551	31951498	247.316	2687
chr1	31974755	31979440	.	1000	.	-1	190.475	-1	2116	1.55	2.75	31976154	31977541	19.7002	327	31974755	31979440	190.475	1814
chr1	32109509	32111383	.	1000	.	-1	175.479	-1	812	5	5	32109864	32111210	62.3159	451	32109509	32111383	175.479	819
chr1	32165152	32168348	.	1000	.	-1	53.9598	-1	1413	1.26	2.45	32165879	32167811	14.1034	453	32165152	32168348	53.9598	1348
chr1	32253720	32254962	.	1000	.	-1	306.734	-1	355	5	5	32253763	32254906	102.603	303	32253720	32254962	306.734	364
chr1	32402430	32406221	.	1000	.	-1	190.475	-1	1121	5	5	32402610	32405536	102.603	436	32402430	32406221	190.475	1109
chr1	32478420	32481771	.	1000	.	-1	453.374	-1	1223	5	5	32478656	32480679	173.09	263	32478420	32481771	453.374	1207
chr1	32527700	32529238	.	913	.	-1	40.6515	-1	1035	1.01	2.2	32527918	32529100	13.1468	183	32527700	32529238	40.6515	1092
chr1	32537773	32539401	.	1000	.	-1	264.01	-1	908	5	5	32537913	32538945	103.212	773	32537773	32539401	264.01	904
chr1	32572823	32575094	.	1000	.	-1	157.51	-1	1004	4.98	5	32573072	32574392	53.1274	762	32572823	32575094	157.51	997
chr1	32644618	32646468	.	1000	.	-1	190.475	-1	824	5	5	32644702	32646287	69.4719	732	32644618	32646468	190.475	833
chr1	32670429	32672145	.	1000	.	-1	152.674	-1	1053	4.05	5	32670596	32672109	36.248	266	32670429	32672145	152.674	1089
chr1	32687163	32689281	.	1000	.	-1	106.125	-1	839	3.38	4.51	32687347	32688559	31.5021	448	32687163	32689281	106.125	1047
chr1	32706025	32707496	.	981	.	-1	39.525	-1	698	1.17	2.36	32706224	32707296	15.0782	290	32706025	32707496	39.525	907
chr1	32756932	32758926	.	1000	.	-1	157.501	-1	911	5	5	32757075	32758341	61.3309	243	32756932	32758926	157.501	904
chr1	32797352	32802261	.	1000	.	-1	277.631	-1	4173	5	5	32797523	32801883	97.9771	814	32797352	32802261	277.631	4160
chr1	32816364	32818188	.	1000	.	-1	164.56	-1	1057	5	5	32816573	32817894	57.1566	814	32816364	32818188	164.56	1091
chr1	32827158	32828163	.	1000	.	-1	88.5535	-1	537	3.36	4.48	32827321	32828041	38.8298	355	32827158	32828163	88.5535	557
chr1	32859346	32861321	.	1000	.	-1	125.87	-1	513	3.72	4.82	32859562	32860811	33.9036	315	32859346	32861321	125.87	478
chr1	32965357	32967107	.	1000	.	-1	180.458	-1	782	5	5	32965673	32966693	78.4668	458	32965357	32967107	180.458	791
chr1	33004394	33006014	.	1000	.	-1	110.619	-1	610	3.63	4.73	33004781	33005779	35.1201	198	33004394	33006014	110.619	599
chr1	33077317	33078465	.	1000	.	-1	49.3383	-1	801	1.62	2.81	33077940	33078354	18.1055	179	33077317	33078465	49.3383	800
chr1	33115296	33117905	.	1000	.	-1	364.545	-1	1071	5	5	33115298	33117617	107.569	1061	33115296	33117905	364.545	1079
chr1	33181355	33182970	.	897	.	-1	34.8282	-1	1114	0.97	2.16	33181802	33182767	14.3025	251	33181355	33182970	34.8282	1396
chr1	33206390	33209466	.	1000	.	-1	264.01	-1	1381	5	5	33206788	33209466	88.8599	530	33206390	33209459	264.01	1410
chr1	33218654	33222007	.	1000	.	-1	283.047	-1	1185	5	5	33219161	33221776	91.8784	681	33218654	33222007	283.047	1182
chr1	33222107	33229545	.	1000	.	-1	390.806	-1	3413	5	5	33222776	33228912	116.737	980	33222107	33229545	390.806	3443
chr1	33281743	33284909	.	1000	.	-1	391.199	-1	1779	5	5	33282361	33284275	129.596	382	33281743	33284909	391.199	1737
chr1	33366374	33367563	.	1000	.	-1	82.9436	-1	443	3.26	4.39	33366410	33367427	41.3509	442	33366374	33367563	82.9436	409
chr1	33429288	33430896	.	1000	.	-1	162.375	-1	1002	5	5	33429381	33430494	74.0984	331	33429288	33430896	162.375	1012
chr1	33501772	33502604	.	1000	.	-1	139.93	-1	529	4.68	5	33501987	33502491	51.7862	339	33501772	33502604	139.93	505
chr1	33592172	33593644	.	1000	.	-1	118.193	-1	514	3.78	4.88	33592382	33593573	36.3468	258	33592172	33593644	118.193	498
chr1	33684622	33687628	.	1000	.	-1	94.3328	-1	595	3.08	4.22	33684706	33686343	29.0374	423	33684622	33687628	94.3328	636
chr1	33720584	33724563	.	1000	.	-1	362.652	-1	994	5	5	33721206	33723931	141.062	336	33720584	33724563	362.652	999
chr1	33814195	33815435	.	1000	.	-1	185.453	-1	848	5	5	33814740	33815358	66.9404	278	33814195	33815435	185.453	874
chr1	33815564	33816721	.	1000	.	-1	193.837	-1	258	4.96	5	33815613	33816326	46.5012	183	33815564	33816721	193.837	284
chr1	35324726	35325492	.	1000	.	-1	116.67	-1	469	3.91	4.99	35324740	35325383	39.7458	435	35324726	35325492	116.67	490
chr1	35331409	35332236	.	1000	.	-1	71.7184	-1	516	2.78	3.94	35331547	35332103	32.6975	381	35331409	35332236	71.7184	513
chr1	35450241	35451364	.	1000	.	-1	139.93	-1	546	4.61	5	35450306	35451318	49.1275	484	35450241	35451364	139.93	544
chr1	35496259	35498158	.	1000	.	-1	259.72	-1	1174	5	5	35496765	35497995	87.4968	675	35496259	35498158	259.72	1168
chr1	35544465	35545973	.	1000	.	-1	147.869	-1	687	4.31	5	35544614	35545711	40.7562	559	35544465	35545973	147.869	666
chr1	35657225	35659921	.	1000	.	-1	515.033	-1	770	5	5	35657387	35659724	164.54	558	35657225	35659921	515.033	802
chr1	35733771	35735192	.	1000	.	-1	420.154	-1	733	5	5	35734182	35735045	179.988	320	35733771	35735192	420.154	736
chr1	35971816	35973025	.	919	.	-1	44.3684	-1	411	1.03	2.21	35972046	35972694	13.1468	223	35971816	35973025	44.3684	370
chr1	36022125	36024269	.	1000	.	-1	496.994	-1	1043	5	5	36022399	36024222	216.843	781	36022125	36024269	496.994	1032
chr1	36106320	36107941	.	1000	.	-1	109.995	-1	833	3.6	4.71	36106355	36107662	35.1201	1004	36106320	36107941	109.995	627
chr1	36183724	36185117	.	1000	.	-1	95.7959	-1	587	3.73	4.82	36183979	36185051	49.1275	330	36183724	36185117	95.7959	589
chr1	36234024	36235922	.	1000	.	-1	112.125	-1	1333	4.08	5	36234586	36235602	47.8102	741	36234024	36235922	112.125	1363
chr1	36273025	36275093	.	1000	.	-1	54.4289	-1	1146	2.07	3.26	36273396	36274442	29.1445	757	36273025	36275093	54.4289	1165
chr1	36348699	36349672	.	1000	.	-1	106.125	-1	313	4.09	5	36348828	36349381	57.3378	186	36348699	36349672	106.125	312
chr1	36395628	36397701	.	1000	.	-1	267.077	-1	928	5	5	36395889	36397420	151.038	628	36395628	36397701	267.077	968
chr1	36553901	36555665	.	1000	.	-1	233.806	-1	711	5	5	36553998	36555205	85.8628	594	36553901	36555665	233.806	731
chr1	36614454	36617578	.	1000	.	-1	108.531	-1	1164	3.45	4.57	36614620	36616577	32.5151	287	36614454	36617578	108.531	466
chr1	36620753	36622963	.	1000	.	-1	233.282	-1	788	5	5	36620949	36622509	101.056	670	36620753	36622963	233.282	711
chr1	36688852	36691101	.	1000	.	-1	197.211	-1	1338	5	5	36689156	36690580	74.0984	290	36688852	36691101	197.211	1351
chr1	36771071	36773196	.	1000	.	-1	215.961	-1	1295	5	5	36771970	36773189	53.1825	253	36771071	36773196	215.961	1278
chr1	36839363	36841484	.	1000	.	-1	116.508	-1	520	3.69	4.79	36839558	36840829	35.1201	279	36839363	36841484	116.508	493
chr1	36850063	36853192	.	1000	.	-1	248.381	-1	1917	5	5	36850715	36853184	74.0984	417	36850063	36853192	248.381	1942
chr1	36862740	36863901	.	1000	.	-1	131.086	-1	604	4.64	5	36862812	36863787	55.7579	532	36862740	36863901	131.086	604
chr1	36915715	36916842	.	1000	.	-1	162.375	-1	599	5	5	36916147	36916704	54.4762	164	36915715	36916842	162.375	603
chr1	36928914	36930715	.	1000	.	-1	122.737	-1	1084	4.29	5	36929186	36930549	48.1187	598	36928914	36930715	122.737	1298
chr1	36951750	36953413	.	1000	.	-1	48.0842	-1	726	1.7	2.89	36952152	36953398	21.2741	219	36951750	36953413	48.0842	743
chr1	37936683	37938131	.	1000	.	-1	79.167	-1	586	2.74	3.9	37936954	37938079	26.4566	234	37936683	37938131	79.167	573
chr1	37939611	37946210	.	1000	.	-1	362.652	-1	784	5	5	37939776	37946023	114.042	538	37939611	37946210	362.652	787
chr1	37979194	37981083	.	1000	.	-1	252.274	-1	986	5	5	37979551	37980836	90.4534	635	37979194	37981083	252.274	981
chr1	38019185	38020506	.	1000	.	-1	159.119	-1	569	4.72	5	38019324	38019927	46.5012	432	38019185	38020506	159.119	567
chr1	38060856	38061674	.	1000	.	-1	87.1269	-1	514	2.64	3.8	38061125	38061546	23.4705	271	38060856	38061674	87.1269	489
chr1	38155055	38156266	.	1000	.	-1	70.0213	-1	938	2.61	3.77	38155696	38156148	27.9829	267	38155055	38156266	70.0213	969
chr1	38157061	38159010	.	1000	.	-1	155.894	-1	1305	5	5	38157390	38158865	58.0304	294	38157061	38159010	155.894	1332
chr1	38258879	38260852	.	1000	.	-1	143.095	-1	760	5	5	38259066	38260417	70.2183	576	38258879	38260852	143.095	758
chr1	38272715	38275069	.	1000	.	-1	167.269	-1	963	5	5	38272813	38274542	62.7232	702	38272715	38275069	167.269	1126
chr1	38324602	38326387	.	1000	.	-1	186.818	-1	1059	5	5	38324835	38325937	58.5674	241	38324602	38326387	186.818	1074
chr1	38396509	38397520	.	1000	.	-1	73.0864	-1	771	2.17	3.35	38396971	38397423	20.2031	306	38396509	38397520	73.0864	774
chr1	38454721	38455772	.	1000	.	-1	118.03	-1	780	3.31	4.43	38455199	38455679	29.1445	312	38454721	38455772	118.03	771
chr1	38477888	38479202	.	1000	.	-1	219.405	-1	694	5	5	38478343	38478934	59.9457	253	38477888	38479202	219.405	681
chr1	39324166	39326047	.	1000	.	-1	152.674	-1	964	4.56	5	39324789	39325986	44.7516	249	39324166	39326047	152.674	959
chr1	39338380	39339917	.	1000	.	-1	65.3837	-1	481	1.78	2.97	39338592	39339622	17.0799	198	39338380	39339917	65.3837	456
chr1	39456162	39458136	.	1000	.	-1	250.848	-1	966	5	5	39456487	39457733	64.1222	654	39456162	39458136	250.848	954
chr1	39491154	39493058	.	1000	.	-1	130.907	-1	1041	4.61	5	39491507	39492974	54.4762	669	39491154	39493058	130.907	1060
chr1	39873797	39875474	.	1000	.	-1	63.6048	-1	410	1.88	3.06	39874043	39875254	18.1055	199	39873797	39875474	63.6048	401
chr1	40040790	40042612	.	1000	.	-1	198.902	-1	1112	5	5	40041083	40042560	66.9404	732	40040790	40042612	198.902	1200
chr1	40105010	40105807	.	971	.	-1	37.1599	-1	587	1.14	2.34	40105464	40105707	18.1055	133	40105010	40105807	37.1599	588
chr1	40204060	40205238	.	1000	.	-1	100.195	-1	696	3.52	4.63	40204556	40205157	36.3468	196	40204060	40205238	100.195	701
chr1	40348578	40349650	.	1000	.	-1	99.7603	-1	424	3.84	4.94	40348642	40349540	51.7862	369	40348578	40349650	99.7603	416
chr1	40504966	40507330	.	1000	.	-1	252.605	-1	976	5	5	40505163	40507070	119.789	497	40504966	40507330	252.605	942
chr1	40572682	40574496	.	1000	.	-1	85.0395	-1	1119	2.43	3.59	40573051	40574273	21.7235	223	40572682	40574496	85.0395	1090
chr1	40626520	40628059	.	1000	.	-1	136.78	-1	709	4.62	5	40626638	40627665	51.5157	568	40626520	40628059	136.78	733
chr1	40722464	40724860	.	1000	.	-1	183.785	-1	977	4.99	5	40722747	40724518	47.8102	474	40722464	40724860	183.785	971
chr1	40770863	40772624	.	1000	.	-1	51.869	-1	920	1.75	2.93	40770863	40772176	19.1467	379	40770865	40772624	51.869	829
chr1	40839313	40840193	.	1000	.	-1	101.98	-1	324	1.99	3.17	40839398	40840163	18.2808	237	40839313	40840193	101.98	327
chr1	40915201	40916350	.	1000	.	-1	64.9417	-1	737	2.55	3.72	40915340	40916081	32.6975	550	40915201	40916350	64.9417	786
chr1	40942594	40943436	.	1000	.	-1	51.4741	-1	528	1.82	3.01	40942672	40943356	21.3315	414	40942594	40943436	51.4741	565
chr1	40973950	40975030	.	1000	.	-1	53.9598	-1	382	1.99	3.18	40974000	40974761	24.5704	160	40973950	40975030	53.9598	555
chr1	40996603	40997848	.	867	.	-1	35.1141	-1	823	0.91	2.09	40996778	40997679	13.1468	130	40996603	40997848	35.1141	820
chr1	41156681	41158727	.	1000	.	-1	557.495	-1	883	5	5	41157248	41158392	217.002	299	41156681	41158727	557.495	901
chr1	41363638	41366493	.	1000	.	-1	210.815	-1	1382	5	5	41364040	41366311	61.3309	616	41363638	41366493	210.815	1361
chr1	41444815	41446474	.	1000	.	-1	187.114	-1	671	5	5	41444866	41446323	50.0883	613	41444815	41446474	187.114	679
chr1	41706951	41708764	.	1000	.	-1	118.193	-1	669	4.14	5	41707020	41708519	46.0245	626	41706951	41708764	118.193	643
chr1	41818358	41820623	.	1000	.	-1	67.6343	-1	1670	2.35	3.52	41818836	41820386	23.4582	197	41818358	41820623	67.6343	1676
chr1	41826857	41829038	.	1000	.	-1	172.192	-1	526	5	5	41826982	41828166	68.3594	309	41826857	41829038	172.192	618
chr1	41831141	41832841	.	1000	.	-1	135.688	-1	810	4.34	5	41831551	41832668	43.9085	377	41831141	41832841	135.688	833
chr1	41836371	41838689	.	1000	.	-1	81.4428	-1	1509	2.65	3.82	41837117	41838113	24.5704	218	41836371	41838689	81.4428	1505
chr1	41964584	41967078	.	994	.	-1	38.3396	-1	2025	1.2	2.4	41965752	41967078	17.0799	213	41964584	41966960	38.3396	2031
chr1	41980086	41981962	.	1000	.	-1	55.7194	-1	1538	1.56	2.76	41980508	41981860	16.0706	263	41980086	41981962	55.7194	1595
chr1	42324952	42329560	.	1000	.	-1	111.968	-1	2941	3.91	5	42325199	42329441	42.0984	856	42324952	42329560	111.968	2929
chr1	42383499	42384474	.	1000	.	-1	114.411	-1	350	3.75	4.84	42383668	42384168	36.3468	182	42383499	42384474	114.411	350
chr1	42500701	42502124	.	1000	.	-1	91.4334	-1	529	3.39	4.52	42500890	42502055	37.2969	190	42500701	42502124	91.4334	555
chr1	42800037	42802402	.	1000	.	-1	277.631	-1	693	5	5	42800147	42801635	102.603	566	42800037	42802402	277.631	711
chr1	42921301	42923221	.	1000	.	-1	379.835	-1	1109	5	5	42921301	42923024	154.393	1117	42921355	42923221	379.835	1048
chr1	43123341	43124957	.	1000	.	-1	101.671	-1	719	3.71	4.81	43123590	43124634	41.3509	232	43123341	43124957	101.671	492
chr1	43146702	43149713	.	1000	.	-1	242.035	-1	1310	5	5	43146831	43149102	75.5486	601	43146702	43149713	242.035	1626
chr1	43232800	43233730	.	1000	.	-1	120.355	-1	332	4.23	5	43232947	43233464	47.8102	172	43232800	43233730	120.355	346
chr1	43282135	43283262	.	1000	.	-1	366.439	-1	782	5	5	43282331	43283093	179.988	575	43282135	43283262	366.439	793
chr1	43312186	43312769	.	1000	.	-1	100.195	-1	277	3.46	4.58	43312282	43312729	34.8555	172	43312186	43312769	100.195	287
chr1	43389607	43390910	.	1000	.	-1	75.2487	-1	621	3.02	4.16	43389607	43390815	49.1275	189	43389620	43390910	75.2487	610
chr1	43396966	43398492	.	1000	.	-1	57.0169	-1	831	1.56	2.76	43397654	43398492	16.0706	73	43396966	43398482	57.0169	851
chr1	43422288	43425333	.	1000	.	-1	167.269	-1	2108	5	5	43423324	43425055	55.8326	1070	43422288	43425333	167.269	2111
chr1	43585380	43587984	.	1000	.	-1	160.75	-1	634	4.3	5	43585384	43587773	38.8298	213	43585380	43587984	160.75	641
chr1	43637156	43638224	.	1000	.	-1	88.677	-1	682	2.12	3.31	43637514	43638175	19.1467	326	43637156	43638224	88.677	680
chr1	43750468	43751731	.	1000	.	-1	57.0169	-1	703	2.04	3.23	43750901	43751674	22.3593	171	43750468	43751731	57.0169	679
chr1	43813986	43815769	.	1000	.	-1	393.135	-1	1029	5	5	43814120	43815484	142.715	926	43813986	43815769	393.135	998
chr1	43823440	43825885	.	1000	.	-1	197.669	-1	746	5	5	43823821	43825345	87.3587	385	43823440	43825885	197.669	722
chr1	43831391	43834813	.	1000	.	-1	299.409	-1	2387	5	5	43831601	43834667	113.564	975	43831391	43834813	299.409	2139
chr1	43854832	43856255	.	1000	.	-1	113.636	-1	895	4.26	5	43854886	43856130	57.1963	867	43854832	43856255	113.636	869
chr1	43918801	43920799	.	1000	.	-1	152.674	-1	568	5	5	43919037	43920741	64.1222	220	43918801	43920799	152.674	556
chr1	43995919	44000261	.	1000	.	-1	362.652	-1	823	5	5	43996098	43999053	164.54	638	43995919	44000261	362.652	829
chr1	44000428	44003962	.	1000	.	-1	222.859	-1	1224	4.77	5	44000898	44003722	42.6253	849	44000428	44003962	222.859	1129
chr1	44013503	44019360	.	1000	.	-1	143.095	-1	2771	4.4	5	44014342	44018602	43.1778	652	44013503	44019360	143.095	2812
chr1	44114305	44116976	.	1000	.	-1	274.032	-1	1269	5	5	44114836	44116557	102.603	327	44114305	44116976	274.032	946
chr1	44171988	44173930	.	1000	.	-1	89.9969	-1	1056	3.43	4.56	44172086	44173930	40.0857	234	44171988	44173880	89.9969	790
chr1	44401125	44402808	.	872	.	-1	66.2849	-1	685	0.91	2.1	44401674	44402515	13.0753	155	44401125	44402808	66.2849	667
chr1	44411500	44413443	.	1000	.	-1	461.235	-1	984	5	5	44411767	44413337	227.806	713	44411500	44413443	461.235	988
chr1	44439686	44441785	.	1000	.	-1	308.57	-1	1120	5	5	44439853	44441675	91.8784	956	44439686	44441785	308.57	1118
chr1	44444269	44444847	.	1000	.	-1	51.869	-1	382	1.68	2.87	44444338	44444801	18.1055	323	44444269	44444847	51.869	372
chr1	44445010	44446038	.	1000	.	-1	160.75	-1	256	5	5	44445042	44445687	55.8326	242	44445010	44446038	160.75	239
chr1	44456233	44458349	.	1000	.	-1	123.351	-1	849	3.24	4.36	44456625	44457824	27.9003	445	44456233	44458349	123.351	861
chr1	44495219	44497328	.	1000	.	-1	188.798	-1	626	4.42	5	44495296	44496716	38.8298	547	44495219	44497328	188.798	629
chr1	44678560	44679598	.	1000	.	-1	159.128	-1	675	5	5	44678886	44679493	68.3594	346	44678560	44679598	159.128	679
chr1	44820359	44821049	.	1000	.	-1	118.863	-1	422	4.27	5	44820448	44820991	50.4529	333	44820359	44821049	118.863	422
chr1	45096944	45098615	.	1000	.	-1	257.941	-1	521	5	5	45096996	45098420	84.3724	295	45096944	45098615	257.941	494
chr1	45139389	45140804	.	1000	.	-1	188.914	-1	637	5	5	45139865	45140613	56.1622	142	45139389	45140804	188.914	631
chr1	45195568	45197261	.	1000	.	-1	276.659	-1	1383	5	5	45195852	45197192	124.742	1105	45195568	45197261	276.659	1378
chr1	45204793	45206299	.	1000	.	-1	77.2397	-1	955	2.96	4.1	45204845	45206132	33.9036	292	45204793	45206299	77.2397	940
chr1	45240304	45243225	.	1000	.	-1	258.78	-1	1234	5	5	45240502	45242630	74.8192	568	45240304	45243225	258.78	1234
chr1	45264737	45266626	.	1000	.	-1	195.523	-1	983	5	5	45265232	45266572	65.5215	125	45264737	45266626	195.523	982
chr1	45271931	45274706	.	1000	.	-1	95.7898	-1	1404	2.97	4.11	45272296	45274422	26.8331	1026	45271931	45274706	95.7898	1417
chr1	45284633	45286611	.	1000	.	-1	465.202	-1	1156	5	5	45284633	45286166	209.827	1155	45284656	45286611	465.202	1135
chr1	45451656	45452930	.	1000	.	-1	43.1424	-1	674	1.37	2.57	45451857	45452752	17.0799	140	45451656	45452930	43.1424	932
chr1	45476068	45477693	.	1000	.	-1	101.276	-1	744	3.24	4.37	45476401	45477038	30.3053	395	45476068	45477693	101.276	760
chr1	45645123	45646746	.	1000	.	-1	217.682	-1	706	5	5	45645407	45646422	48.5949	242	45645123	45646746	217.682	704
chr1	45671598	45672960	.	1000	.	-1	152.538	-1	317	5	5	45671649	45672746	75.5486	254	45671598	45672960	152.538	330
chr1	45768735	45770632	.	1000	.	-1	245.553	-1	956	5	5	45768801	45770302	96.4448	241	45768735	45770632	245.553	958
chr1	45792169	45795784	.	1000	.	-1	82.8601	-1	535	2.82	3.97	45792238	45795206	26.8331	322	45792169	45795784	82.8601	566
chr1	45804253	45806953	.	1000	.	-1	340.084	-1	1718	5	5	45804829	45806544	102.603	1130	45804253	45806953	340.084	1730
chr1	45875283	45878951	.	1000	.	-1	193.837	-1	1378	4.8	5	45875642	45878063	43.9085	1543	45875283	45878951	193.837	855
chr1	45955648	45956970	.	1000	.	-1	130.907	-1	979	3.59	4.7	45955739	45956847	31.5021	287	45955648	45956970	130.907	965
chr1	45965114	45966471	.	1000	.	-1	52.4543	-1	1097	1.95	3.14	45965158	45966438	25.6955	311	45965114	45966471	52.4543	1061
chr1	45985984	45988422	.	1000	.	-1	240.28	-1	1377	5	5	45986414	45988251	75.5486	933	45985984	45988422	240.28	1391
chr1	46015701	46017576	.	1000	.	-1	133.097	-1	941	4.73	5	46015876	46017164	58.5237	752	46015701	46017576	133.097	956
chr1	46049183	46051041	.	1000	.	-1	245.553	-1	856	5	5	46049230	46050655	59.9457	217	46049183	46051041	245.553	784
chr1	46150997	46155045	.	1000	.	-1	475.098	-1	1541	5	5	46151414	46154622	136.177	1148	46150997	46155045	475.098	1517
chr1	46215324	46217381	.	1000	.	-1	228.059	-1	797	5	5	46215523	46216900	84.3724	615	46215324	46217381	228.059	781
chr1	46268150	46270134	.	1000	.	-1	77.245	-1	1260	2.9	4.04	46268648	46269891	31.5021	416	46268150	46270134	77.245	1267
chr1	46595900	46600862	.	1000	.	-1	441.599	-1	2815	5	5	46596519	46600654	170.882	660	46595900	46600862	441.599	2580
chr1	46600948	46602501	.	867	.	-1	44.3649	-1	424	0.91	2.09	46600965	46601762	12.2094	248	46600948	46602501	44.3649	583
chr1	46636203	46639465	.	1000	.	-1	292.116	-1	1262	5	5	46636516	46639387	76.1698	945	46636203	46639465	292.116	1266
chr1	46648007	46650456	.	1000	.	-1	75.5912	-1	1272	3.01	4.15	46648108	46649915	40.0857	1166	46648007	46650456	75.5912	1278
chr1	46662918	46664749	.	1000	.	-1	109.117	-1	1019	3.98	5	46663573	46664579	46.5012	386	46662918	46664749	109.117	997
chr1	46713300	46714178	.	1000	.	-1	43.1458	-1	321	1.45	2.64	46713461	46714094	26.8331	171	46713300	46714178	43.1458	311
chr1	46767225	46770979	.	1000	.	-1	364.545	-1	1500	5	5	46767443	46770371	129.596	701	46767225	46770979	364.545	1488
chr1	46804500	46807128	.	1000	.	-1	290.284	-1	1627	5	5	46804933	46806833	126.356	1244	46804500	46807128	290.284	1577
chr1	46859598	46860727	.	1000	.	-1	147.869	-1	483	4.97	5	46859716	46860459	57.1963	345	46859598	46860727	147.869	503
chr1	47069191	47070493	.	1000	.	-1	124.327	-1	584	3.46	4.58	47069574	47069958	30.3177	202	47069191	47070493	124.327	583
chr1	47082072	47082741	.	1000	.	-1	55.213	-1	308	1.82	3.01	47082261	47082576	19.1467	137	47082072	47082741	55.213	291
chr1	47133225	47134623	.	1000	.	-1	147.869	-1	636	5	5	47133520	47134357	75.5486	347	47133225	47134623	147.869	630
chr1	47184041	47185798	.	1000	.	-1	183.524	-1	577	5	5	47184208	47185527	65.528	291	47184041	47185798	183.524	569
chr1	47220557	47225934	.	1000	.	-1	312.249	-1	2738	5	5	47220685	47225542	128.386	2612	47220557	47225934	312.249	2736
chr1	47778508	47781190	.	1000	.	-1	221.131	-1	1924	5	5	47779215	47781025	61.3309	434	47778508	47781190	221.131	1881
chr1	47798214	47800955	.	1000	.	-1	224.59	-1	1529	5	5	47798656	47800578	88.8599	1107	47798214	47800955	224.59	1509
chr1	47902464	47904096	.	1000	.	-1	133.679	-1	874	4.95	5	47902534	47904096	72.6543	989	47902464	47904095	133.679	690
chr1	51425044	51427075	.	1000	.	-1	190.475	-1	722	5	5	51425227	51426706	61.3309	445	51425044	51427075	190.475	723
chr1	51433470	51435849	.	1000	.	-1	189.443	-1	600	5	5	51433643	51435704	59.9457	460	51433470	51435849	189.443	567
chr1	51701282	51703192	.	1000	.	-1	253.659	-1	840	5	5	51701624	51702853	55.1578	484	51701282	51703192	253.659	855
chr1	51761838	51764379	.	1000	.	-1	64.8372	-1	1120	1.54	2.74	51762779	51763117	15.8215	203	51761838	51764379	64.8372	1097
chr1	51778776	51781713	.	959	.	-1	38.3336	-1	964	1.11	2.31	51779127	51780818	15.0782	603	51778776	51781713	38.3336	939
chr1	51786062	51798807	.	1000	.	-1	377.839	-1	10490	5	5	51787128	51798317	111.984	403	51786062	51798807	377.839	10428
chr1	51809577	51812037	.	1000	.	-1	110.619	-1	965	3.1	4.23	51810237	51810761	26.8331	278	51809577	51812037	110.619	992
chr1	51983132	51985085	.	1000	.	-1	141.511	-1	1471	5	5	51983586	51984985	81.4082	1191	51983132	51985085	141.511	1298
chr1	52031833	52038291	.	1000	.	-1	308.57	-1	3524	5	5	52032047	52037798	117.452	1388	52031833	52038291	308.57	3517
chr1	52082724	52084065	.	1000	.	-1	70.7478	-1	200	1.93	3.12	52082751	52083607	18.1055	151	52082724	52084065	70.7478	222
chr1	52194737	52196029	.	1000	.	-1	104.039	-1	933	3.82	4.92	52194737	52195929	43.9085	264	52194740	52196029	104.039	915
chr1	52343392	52345674	.	1000	.	-1	266.858	-1	823	5	5	52343563	52345343	94.9176	452	52343392	52345674	266.858	809
chr1	52498158	52499982	.	1000	.	-1	198.891	-1	1172	5	5	52498509	52499532	60.5401	826	52498158	52499982	198.891	1167
chr1	52520194	52523057	.	1000	.	-1	298.25	-1	1943	5	5	52520549	52522511	94.2493	505	52520194	52523057	298.25	1960
chr1	52607290	52608764	.	1000	.	-1	115.151	-1	678	4.27	5	52607483	52608573	54.4762	461	52607290	52608764	115.151	703
chr1	52830431	52832410	.	1000	.	-1	231.538	-1	1198	5	5	52831045	52831906	86.0264	602	52830431	52832410	231.538	1180
chr1	52869186	52871138	.	1000	.	-1	179.722	-1	1245	5	5	52869524	52870852	52.4978	317	52869186	52871138	179.722	1285
chr1	53163030	53164814	.	1000	.	-1	123.839	-1	870	4.43	5	53163185	53164425	53.1274	730	53163030	53164814	123.839	856
chr1	53168748	53169576	.	1000	.	-1	39.5282	-1	459	1.27	2.47	53168822	53169349	17.3403	379	53168748	53169576	39.5282	466
chr1	53191949	53192776	.	1000	.	-1	109.117	-1	351	4.15	5	53192120	53192527	57.1963	210	53191949	53192776	109.117	321
chr1	53308185	53310120	.	1000	.	-1	96.9627	-1	721	3.38	4.5	53308468	53309995	33.9036	530	53308185	53310120	96.9627	630
chr1	53386868	53387730	.	1000	.	-1	57.0169	-1	423	2	3.19	53387110	53387451	21.2741	172	53386868	53387730	57.0169	433
chr1	53662056	53663392	.	1000	.	-1	236.764	-1	601	5	5	53662443	53663273	87.3587	219	53662056	53663392	236.764	597
chr1	53685213	53687061	.	1000	.	-1	296.031	-1	964	5	5	53685933	53686816	166.244	232	53685213	53687061	296.031	976
chr1	53703403	53704986	.	1000	.	-1	78.5202	-1	1130	2.33	3.5	53703856	53704626	21.2741	127	53703403	53704986	78.5202	1159
chr1	53791187	53793676	.	1000	.	-1	113.636	-1	1125	4.17	5	53791343	53793672	50.4529	284	53791187	53793676	113.636	1102
chr1	54302894	54304449	.	1000	.	-1	445.518	-1	1216	5	5	54303241	54304316	183.456	871	54302894	54304449	445.518	1214
chr1	54354911	54355948	.	1000	.	-1	54.1672	-1	399	2.02	3.21	54355131	54355476	25.6955	165	54354911	54355948	54.1672	414
chr1	54410731	54412707	.	1000	.	-1	160.75	-1	1244	5	5	54410998	54412302	68.3594	1118	54410731	54412707	160.75	1103
chr1	54517559	54520026	.	1000	.	-1	121.252	-1	1134	4.12	5	54518109	54519714	43.9085	372	54517559	54520026	121.252	1148
chr1	54665191	54666515	.	1000	.	-1	110.619	-1	829	3.95	5	54665301	54666491	43.9085	199	54665191	54666515	110.619	832
chr1	54870940	54874368	.	1000	.	-1	187.124	-1	1449	5	5	54871064	54873873	72.6543	370	54870940	54874368	187.124	1468
chr1	54953437	54955347	.	1000	.	-1	118.863	-1	1234	4.27	5	54953532	54955233	50.4529	189	54953437	54955347	118.863	1607
chr1	55181439	55182074	.	1000	.	-1	109.995	-1	269	3.21	4.34	55181514	55181934	28.2473	182	55181439	55182074	109.995	282
chr1	55229307	55230320	.	1000	.	-1	136.772	-1	675	4.12	5	55229567	55230232	38.8298	480	55229307	55230320	136.772	611
chr1	55351137	55354164	.	1000	.	-1	152.665	-1	1543	5	5	55351967	55353892	81.4082	713	55351137	55354164	152.665	1544
chr1	55680318	55681724	.	1000	.	-1	107.072	-1	931	4.07	5	55680411	55681663	54.4667	814	55680318	55681724	107.072	955
chr1	57033931	57037474	.	1000	.	-1	108.531	-1	1059	3.45	4.57	57034350	57037299	32.5151	445	57033931	57037474	108.531	1056
chr1	57043447	57045574	.	1000	.	-1	173.839	-1	1377	5	5	57044055	57045574	54.4762	764	57043447	57045537	173.839	1382
chr1	59011347	59012915	.	1000	.	-1	292.116	-1	816	5	5	59011450	59012488	96.4448	737	59011347	59012915	292.116	792
chr1	59041153	59044222	.	1000	.	-1	379.728	-1	1554	5	5	59041688	59043701	116.736	1032	59041153	59044222	379.728	1541
chr1	59084844	59087338	.	1000	.	-1	162.01	-1	1582	4.81	5	59084877	59087194	47.8102	481	59084844	59087338	162.01	1586
chr1	59164858	59166188	.	1000	.	-1	180.458	-1	732	5	5	59165215	59165783	74.0984	404	59164858	59166188	180.458	703
chr1	59247052	59251704	.	1000	.	-1	343.827	-1	3135	5	5	59247584	59251573	152.756	1081	59247052	59251704	343.827	3123
chr1	59279047	59282812	.	1000	.	-1	301.237	-1	1525	5	5	59279324	59282543	103.13	1226	59279047	59282812	301.237	1548
chr1	59369034	59370308	.	1000	.	-1	180.458	-1	692	5	5	59369088	59370149	66.3286	169	59369034	59370308	180.458	688
chr1	59761586	59763709	.	1000	.	-1	81.4483	-1	1317	2.36	3.53	59761875	59763084	21.2741	224	59761586	59763709	81.4483	1335
chr1	59891671	59893813	.	1000	.	-1	55.7153	-1	1626	2.1	3.29	59892650	59893625	27.0013	639	59891671	59893813	55.7153	1635
chr1	60279682	60280285	.	864	.	-1	33.6735	-1	335	0.9	2.08	60279872	60280179	19.1467	149	60279682	60280285	33.6735	331
chr1	60280434	60281510	.	1000	.	-1	206.716	-1	361	5	5	60280513	60281344	64.1222	251	60280434	60281510	206.716	393
chr1	61542181	61543646	.	1000	.	-1	85.6994	-1	853	2.91	4.05	61542337	61543583	27.9829	655	61542181	61543646	85.6994	895
chr1	61547383	61549405	.	889	.	-1	33.6764	-1	1591	0.95	2.14	61547421	61549320	17.7316	407	61547383	61549405	33.6764	1695
chr1	62107568	62109365	.	885	.	-1	68.0983	-1	1040	0.94	2.13	62107628	62109283	13.1468	342	62107568	62109365	68.0983	1519
chr1	62190081	62191404	.	1000	.	-1	138.353	-1	560	4.29	5	62190337	62191312	41.9628	303	62190081	62191404	138.353	562
chr1	62206926	62209888	.	1000	.	-1	379.745	-1	1358	5	5	62207397	62209373	129.596	916	62206926	62209888	379.745	1329
chr1	62900988	62904333	.	1000	.	-1	475.098	-1	1592	5	5	62901027	62903604	214.903	505	62900988	62904333	475.098	1595
chr1	63153050	63154624	.	1000	.	-1	152.674	-1	742	5	5	63153244	63154436	59.9457	626	63153050	63154624	152.674	665
chr1	63248916	63250322	.	1000	.	-1	168.907	-1	686	5	5	63249431	63250205	68.3594	179	63248916	63250322	168.907	679
chr1	63782495	63783495	.	1000	.	-1	98.7241	-1	513	3.61	4.72	63782831	63783414	39.7458	164	63782495	63783495	98.7241	527
chr1	63832704	63834045	.	1000	.	-1	100.195	-1	765	3.75	4.84	63832853	63833849	43.9085	152	63832704	63834045	100.195	768
chr1	63988182	63989887	.	1000	.	-1	185.453	-1	881	4.73	5	63988423	63989727	43.4871	633	63988182	63989887	185.453	889
chr1	64058900	64060397	.	1000	.	-1	66.2849	-1	727	1.58	2.78	64059088	64060141	16.0706	558	64058900	64060397	66.2849	708
chr1	64809399	64810742	.	1000	.	-1	88.5594	-1	406	2.53	3.69	64809483	64810400	22.3593	318	64809399	64810742	88.5594	411
chr1	64935477	64936619	.	1000	.	-1	40.7255	-1	491	1.36	2.55	64935488	64936519	21.2741	443	64935477	64936619	40.7255	529
chr1	65210118	65211430	.	1000	.	-1	59.6323	-1	455	2.32	3.48	65210176	65211273	37.5834	250	65210118	65211430	59.6323	603
chr1	65431262	65432816	.	1000	.	-1	155.894	-1	754	4.79	5	65431581	65432666	49.1275	269	65431262	65432816	155.894	750
chr1	65447965	65448890	.	850	.	-1	32.5344	-1	662	0.87	2.05	65448218	65448868	14.3025	422	65447965	65448890	32.5344	650
chr1	65467830	65468958	.	1000	.	-1	85.6938	-1	671	3.08	4.22	65468234	65468751	31.5021	275	65467830	65468958	85.6938	663
chr1	65612844	65615103	.	1000	.	-1	84.5757	-1	1416	3.32	4.44	65612899	65614927	41.8588	1304	65612844	65615103	84.5757	1474
chr1	65886123	65887311	.	1000	.	-1	185.453	-1	445	5	5	65886328	65887064	78.4668	228	65886123	65887311	185.453	458
chr1	66648366	66650065	.	1000	.	-1	60.95	-1	514	2.2	3.38	66648563	66649690	23.4582	290	66648366	66650065	60.95	542
chr1	66737103	66738786	.	1000	.	-1	107.619	-1	649	3.15	4.28	66737168	66738323	27.9829	648	66737103	66738786	107.619	586
chr1	67389674	67391716	.	1000	.	-1	275.847	-1	1116	5	5	67390087	67391483	99.5143	708	67389674	67391716	275.847	1112
chr1	67395502	67397173	.	1000	.	-1	177.142	-1	600	5	5	67395566	67396705	61.903	543	67395502	67397173	177.142	593
chr1	67518266	67520476	.	1000	.	-1	220.363	-1	1414	5	5	67518942	67520167	68.3594	621	67518266	67520476	220.363	1532
chr1	67894824	67897334	.	1000	.	-1	268.648	-1	1298	5	5	67894971	67897136	88.8599	508	67894824	67897334	268.648	1616
chr1	68150842	68153056	.	1000	.	-1	176.174	-1	784	5	5	68150937	68152579	62.7232	430	68150842	68153056	176.174	1044
chr1	68961845	68963386	.	1000	.	-1	88.8784	-1	761	3.53	4.64	68962074	68962877	50.4529	565	68961845	68963386	88.8784	728
chr1	70670729	70672286	.	1000	.	-1	77.9108	-1	824	2.85	4	70670872	70672096	29.1445	172	70670729	70672286	77.9108	834
chr1	70686268	70688159	.	1000	.	-1	226.323	-1	1049	5	5	70686598	70687920	67.6786	654	70686268	70688159	226.323	1114
chr1	70819053	70821053	.	1000	.	-1	221.057	-1	1193	5	5	70819505	70820950	94.9176	749	70819053	70821053	221.057	1186
chr1	70875969	70877343	.	1000	.	-1	64.9417	-1	649	1.62	2.81	70876283	70877319	16.0706	214	70875969	70877343	64.9417	636
chr1	71545838	71547334	.	1000	.	-1	177.142	-1	842	5	5	71546237	71547029	59.9457	286	71545838	71547334	177.142	1000
chr1	75198301	75199601	.	1000	.	-1	107.619	-1	720	3.74	4.83	75198650	75199453	38.8298	375	75198301	75199601	107.619	717
chr1	76189284	76190968	.	1000	.	-1	182.12	-1	899	5	5	76189524	76190729	67.4927	651	76189284	76190968	182.12	908
chr1	76250983	76252698	.	1000	.	-1	103.151	-1	828	3.59	4.7	76251266	76252629	36.3468	800	76250983	76252698	103.151	573
chr1	77684606	77685662	.	1000	.	-1	51.2468	-1	311	1.81	2.99	77684735	77685532	21.2741	156	77684606	77685662	51.2468	311
chr1	78147140	78150085	.	1000	.	-1	366.439	-1	1853	5	5	78147523	78149744	146.353	1459	78147140	78150085	366.439	1864
chr1	78224456	78225725	.	1000	.	-1	188.914	-1	877	5	5	78224822	78225563	49.1275	532	78224456	78225725	188.914	856
chr1	78244796	78245996	.	1000	.	-1	54.7991	-1	767	1.98	3.16	78244829	78245905	22.3593	173	78244796	78245996	54.7991	769
chr1	78442978	78445906	.	1000	.	-1	231.538	-1	1761	5	5	78443633	78445810	81.4082	556	78442978	78445906	231.538	1433
chr1	78469892	78471128	.	1000	.	-1	55.7194	-1	483	1.57	2.77	78470220	78470508	16.1336	165	78469892	78471128	55.7194	473
chr1	81058628	81060910	.	1000	.	-1	94.3389	-1	998	3.73	4.83	81059048	81060494	58.5674	466	81058628	81060910	94.3389	999
chr1	81099043	81100962	.	1000	.	-1	45.5394	-1	860	1.4	2.59	81099316	81100962	36.3468	382	81099043	81100949	45.5394	847
chr1	81472096	81474092	.	1000	.	-1	57.0169	-1	1158	2.11	3.29	81472827	81474009	23.9063	429	81472096	81474092	57.0169	1157
chr1	81474258	81475698	.	939	.	-1	44.3684	-1	296	1.07	2.26	81474416	81475133	13.1468	159	81474258	81475698	44.3684	275
chr1	81630910	81635037	.	1000	.	-1	55.7194	-1	2382	1.99	3.18	81631425	81634647	22.068	443	81630910	81635037	55.7194	2412
chr1	81644076	81645032	.	1000	.	-1	51.869	-1	573	1.69	2.88	81644191	81644871	18.2271	464	81644076	81645032	51.869	568
chr1	83517159	83523040	.	1000	.	-1	97.2577	-1	3339	3.09	4.23	83517411	83522540	28.0917	140	83517159	83523040	97.2577	3733
chr1	84764186	84765133	.	1000	.	-1	45.924	-1	263	1.49	2.68	84764281	84764968	17.2218	159	84764186	84765133	45.924	273
chr1	84944593	84945837	.	1000	.	-1	130.523	-1	486	4.5	5	84944914	84945489	51.1972	169	84944593	84945837	130.523	482
chr1	84970674	84972951	.	1000	.	-1	261.897	-1	1046	5	5	84970934	84972798	88.8599	809	84970674	84972951	261.897	1023
chr1	85038580	85040192	.	1000	.	-1	130.523	-1	1347	3.56	4.68	85039396	85040102	31.4278	528	85038580	85040192	130.523	1351
chr1	85086247	85086873	.	1000	.	-1	51.869	-1	376	1.93	3.12	85086366	85086816	27.9829	246	85086247	85086873	51.869	388
chr1	85155335	85157249	.	1000	.	-1	229.798	-1	676	5	5	85155540	85156870	69.7847	468	85155335	85157249	229.798	679
chr1	85662322	85669549	.	1000	.	-1	502.591	-1	4797	5	5	85663489	85669281	206.127	817	85662322	85669549	502.591	4888
chr1	85679044	85682904	.	1000	.	-1	187.124	-1	2207	5	5	85679183	85682712	81.4082	634	85679044	85682904	187.124	2175
chr1	85688891	85692364	.	1000	.	-1	79.3432	-1	2557	2.39	3.55	85689242	85692121	21.6999	410	85688891	85692364	79.3432	2551
chr1	85694913	85696610	.	1000	.	-1	53.1453	-1	1258	1.98	3.17	85695114	85696473	25.661	171	85694913	85696610	53.1453	1321
chr1	85724538	85725740	.	1000	.	-1	182.12	-1	613	4.86	5	85724662	85725353	45.6323	479	85724538	85725740	182.12	623
chr1	85741271	85743374	.	1000	.	-1	243.793	-1	796	5	5	85741683	85742842	82.8875	290	85741271	85743374	243.793	727
chr1	85929482	85931781	.	1000	.	-1	151.069	-1	1184	4.75	5	85929919	85931420	49.1275	335	85929482	85931781	151.069	1109
chr1	86107056	86108267	.	1000	.	-1	62.2742	-1	650	1.97	3.15	86107494	86108018	19.1467	209	86107056	86108267	62.2742	653
chr1	86172875	86174980	.	1000	.	-1	57.0169	-1	1268	1.78	2.96	86173672	86174681	18.1055	193	86172875	86174980	57.0169	1487
chr1	86861263	86862556	.	1000	.	-1	40.7255	-1	589	1.35	2.54	86861473	86861984	21.2741	347	86861263	86862556	40.7255	621
chr1	87169993	87171416	.	1000	.	-1	122.787	-1	367	4.5	5	87170137	87171158	57.1963	237	87169993	87171416	122.787	354
chr1	87379230	87381156	.	1000	.	-1	130.523	-1	668	4.45	5	87379535	87381156	49.1275	307	87379230	87381108	130.523	651
chr1	87793540	87795609	.	1000	.	-1	154.283	-1	1030	4.47	5	87793676	87795009	42.6253	175	87793540	87795609	154.283	1186
chr1	87796822	87797925	.	1000	.	-1	97.2577	-1	404	3.01	4.15	87797062	87797687	26.8331	185	87796822	87797925	97.2577	384
chr1	87800367	87801440	.	874	.	-1	35.9894	-1	754	0.92	2.11	87800743	87801391	25.6955	282	87800367	87801440	35.9894	850
chr1	89148793	89151175	.	1000	.	-1	165.634	-1	1382	4.71	5	89149290	89150705	45.2006	183	89148793	89151175	165.634	1449
chr1	89356538	89357886	.	1000	.	-1	67.6343	-1	550	2.66	3.82	89356862	89357272	32.6975	227	89356538	89357886	67.6343	549
chr1	89457154	89459509	.	1000	.	-1	130.523	-1	990	4.28	5	89457930	89459335	43.9085	184	89457154	89459509	130.523	1020
chr1	89989643	89991299	.	1000	.	-1	149.407	-1	919	4.61	5	89989769	89991048	46.5012	803	89989643	89991299	149.407	910
chr1	90286031	90287801	.	1000	.	-1	100.195	-1	941	3.48	4.6	90286171	90287598	35.1201	791	90286031	90287801	100.195	951
chr1	90308569	90309690	.	908	.	-1	35.9894	-1	597	1	2.19	90308988	90309586	14.1034	150	90308569	90309690	35.9894	626
chr1	90459973	90461533	.	1000	.	-1	175.489	-1	935	5	5	90460450	90461357	53.1274	440	90459973	90461533	175.489	953
chr1	91486619	91488500	.	1000	.	-1	252.618	-1	873	5	5	91486900	91488162	105.712	598	91486619	91488500	252.618	867
chr1	91965968	91967445	.	1000	.	-1	122.787	-1	566	4.38	5	91966047	91967333	51.7862	463	91965968	91967445	122.787	591
chr1	92545523	92546751	.	1000	.	-1	64.9417	-1	646	1.61	2.81	92545928	92546546	16.0706	268	92545523	92546751	64.9417	620
chr1	92763837	92765291	.	1000	.	-1	185.453	-1	572	5	5	92763978	92765059	69.7847	447	92763837	92765291	185.453	557
chr1	93249949	93251130	.	1000	.	-1	51.869	-1	566	1.91	3.1	93250108	93251096	24.5704	259	93249949	93251130	51.869	594
chr1	93297501	93298726	.	1000	.	-1	141.511	-1	285	3.84	4.94	93297600	93298476	33.9036	185	93297501	93298726	141.511	287
chr1	93426374	93427928	.	1000	.	-1	66.2849	-1	943	2.02	3.22	93427181	93427697	19.1467	149	93426374	93427928	66.2849	931
chr1	93544054	93545939	.	1000	.	-1	128.968	-1	932	3.98	5	93544364	93545699	37.5834	182	93544054	93545939	128.968	911
chr1	93644765	93646874	.	1000	.	-1	164.003	-1	941	4.54	5	93645301	93646624	42.6253	268	93644765	93646874	164.003	979
chr1	93810626	93812661	.	1000	.	-1	169.872	-1	998	5	5	93810841	93812255	59.9457	788	93810626	93812661	169.872	994
chr1	93912534	93915241	.	1000	.	-1	207.398	-1	1369	5	5	93913648	93914735	46.5012	226	93912534	93915241	207.398	1399
chr1	94044205	94047784	.	1000	.	-1	64.9417	-1	1022	2.24	3.41	94044546	94046596	22.3593	301	94044205	94047784	64.9417	991
chr1	94048699	94051687	.	1000	.	-1	44.3684	-1	1576	1.55	2.74	94049836	94051569	21.2741	295	94048699	94051687	44.3684	1599
chr1	94146465	94147772	.	1000	.	-1	91.4393	-1	667	3.01	4.15	94146649	94147606	27.9829	549	94146465	94147772	91.4393	601
chr1	94311545	94313937	.	1000	.	-1	149.467	-1	1321	5	5	94311668	94313757	58.5674	1280	94311545	94313937	149.467	1240
chr1	94343666	94345481	.	1000	.	-1	144.683	-1	912	3.93	5	94344111	94345178	35.1201	522	94343666	94345481	144.683	858
chr1	94374022	94375211	.	1000	.	-1	62.2742	-1	862	2.39	3.55	94374298	94375124	27.9829	544	94374022	94375211	62.2742	904
chr1	94566371	94567798	.	1000	.	-1	40.7255	-1	664	1.35	2.54	94566622	94567266	21.2741	475	94566371	94567798	40.7255	603
chr1	94702388	94703728	.	1000	.	-1	89.9969	-1	524	2.59	3.75	94702616	94703515	22.8201	233	94702388	94703728	89.9969	507
chr1	94883175	94884902	.	1000	.	-1	143.095	-1	1002	4.43	5	94883518	94884461	43.9085	208	94883175	94884902	143.095	1012
chr1	95537863	95539259	.	1000	.	-1	132.082	-1	522	4.52	5	95537944	95538967	50.4529	430	95537863	95539259	132.082	533
chr1	95699285	95700238	.	1000	.	-1	82.8601	-1	660	3.2	4.33	95699746	95700238	37.5834	176	95699285	95700237	82.8601	684
chr1	96523907	96528925	.	1000	.	-1	106.125	-1	1162	3.49	4.61	96524090	96528492	33.7032	568	96523907	96528925	106.125	1141
chr1	96538345	96543320	.	1000	.	-1	50.5999	-1	3568	1.85	3.03	96538603	96543165	23.4582	370	96538345	96543320	50.5999	3577
chr1	96628399	96630045	.	1000	.	-1	44.3684	-1	1018	1.36	2.55	96628968	96629912	16.0706	404	96628399	96630045	44.3684	1064
chr1	97186769	97188805	.	1000	.	-1	183.785	-1	772	5	5	97186957	97188260	59.9457	563	97186769	97188805	183.785	794
chr1	99126693	99128204	.	998	.	-1	38.3396	-1	927	1.2	2.4	99126976	99127761	19.7002	186	99126693	99128204	38.3396	958
chr1	100231743	100232466	.	1000	.	-1	50.5999	-1	296	1.25	2.45	100231861	100232178	14.1034	169	100231743	100232466	50.5999	305
chr1	100315154	100316382	.	1000	.	-1	119.721	-1	637	3.87	4.97	100315270	100316132	37.5834	515	100315154	100316382	119.721	644
chr1	100430157	100433129	.	1000	.	-1	74.4703	-1	2075	2.39	3.55	100430702	100432550	22.3593	240	100430157	100433129	74.4703	2092
chr1	100434666	100437498	.	1000	.	-1	173.839	-1	1014	5	5	100434883	100436846	66.9404	523	100434666	100437498	173.839	1018
chr1	100502683	100505353	.	1000	.	-1	274.032	-1	1335	5	5	100503089	100504622	68.3594	930	100502683	100505353	274.032	1335
chr1	100597822	100599386	.	1000	.	-1	62.2742	-1	547	2.44	3.6	100597996	100599086	33.9036	254	100597822	100599386	62.2742	548
chr1	100714781	100715442	.	1000	.	-1	59.6323	-1	421	1.69	2.88	100714857	100715375	17.0799	347	100714781	100715442	59.6323	419
chr1	100731364	100732473	.	1000	.	-1	106.125	-1	588	3.24	4.37	100731375	100732264	29.1445	145	100731364	100732473	106.125	583
chr1	100816567	100818919	.	1000	.	-1	70.3511	-1	495	2.63	3.79	100816578	100818700	27.9829	154	100816567	100818919	70.3511	506
chr1	101359899	101362391	.	1000	.	-1	110.619	-1	763	3.36	4.48	101360426	101362125	30.3177	177	101359899	101362391	110.619	801
chr1	101490845	101492155	.	1000	.	-1	58.3212	-1	735	2.26	3.44	101490845	101491905	32.6975	142	101490897	101492155	58.3212	722
chr1	104068236	104069260	.	1000	.	-1	91.4393	-1	211	3.33	4.46	104068296	104068969	35.1201	123	104068236	104069260	91.4393	239
chr1	107598724	107600760	.	1000	.	-1	317.097	-1	808	5	5	107598800	107600702	170.025	710	107598724	107600760	317.097	830
chr1	108167895	108170233	.	882	.	-1	35.4599	-1	1103	0.94	2.13	108168543	108169879	13.2129	290	108167895	108170233	35.4599	1124
chr1	108224017	108228620	.	1000	.	-1	109.12	-1	2077	3.29	4.41	108224789	108228397	29.3111	328	108224017	108228620	109.12	2101
chr1	108228708	108235585	.	1000	.	-1	165.178	-1	2615	4.11	5	108229128	108234347	36.2721	295	108228708	108235585	165.178	2098
chr1	108740993	108744062	.	1000	.	-1	473.91	-1	1606	5	5	108741413	108743689	190.973	1180	108740993	108744062	473.91	1613
chr1	108814282	108818388	.	1000	.	-1	108.999	-1	1283	3.21	4.34	108815047	108816313	28.4522	379	108814282	108818388	108.999	1422
chr1	108923226	108926323	.	1000	.	-1	93.9955	-1	1297	1.6	2.79	108923851	108925645	16.3614	473	108923226	108926323	93.9955	1157
chr1	108961756	108965400	.	1000	.	-1	115.262	-1	2156	3.63	4.73	108963336	108964567	34.0026	566	108961756	108965400	115.262	2166
chr1	109053634	109058277	.	1000	.	-1	226.065	-1	2568	5	5	109054990	109057122	47.8827	312	109053634	109058277	226.065	2607
chr1	109060569	109065386	.	1000	.	-1	310.404	-1	2205	5	5	109061905	109064037	75.9352	859	109060569	109065386	310.404	2216
chr1	109073367	109080015	.	1000	.	-1	248.358	-1	3160	5	5	109074768	109078222	76.6759	773	109073367	109080015	248.358	3165
chr1	109089916	109093259	.	1000	.	-1	118.199	-1	1935	3.82	4.92	109090315	109093120	37.2203	911	109089916	109093259	118.199	1819
chr1	109093420	109114503	.	1000	.	-1	410.167	-1	9729	5	5	109093731	109112501	188.931	1956	109093420	109114503	410.167	9745
chr1	109202966	109205061	.	1000	.	-1	465.449	-1	996	5	5	109203171	109204592	147.425	771	109202966	109205061	465.449	1017
chr1	109234088	109237330	.	1000	.	-1	337.171	-1	988	5	5	109234130	109236380	170.636	937	109234088	109237330	337.171	998
chr1	109288912	109290418	.	1000	.	-1	328.99	-1	568	5	5	109289235	109290030	124.323	226	109288912	109290418	328.99	587
chr1	109372274	109374045	.	1000	.	-1	39.2137	-1	667	1.25	2.45	109372813	109373693	20.2031	174	109372274	109374045	39.2137	610
chr1	109418930	109420514	.	1000	.	-1	209.986	-1	816	5	5	109418992	109420437	66.3286	740	109418930	109420514	209.986	831
chr1	109505025	109506568	.	1000	.	-1	192.427	-1	889	5	5	109505229	109506516	71.7647	415	109505025	109506568	192.427	882
chr1	109583779	109584826	.	1000	.	-1	153.636	-1	723	3.38	4.5	109583830	109584715	28.7294	733	109583779	109584826	153.636	662
chr1	109607928	109610296	.	1000	.	-1	79.3432	-1	1441	1.53	2.72	109608299	109609686	15.8742	145	109607928	109610296	79.3432	1456
chr1	109617829	109619452	.	1000	.	-1	250.813	-1	1058	5	5	109618172	109619393	88.6136	730	109617829	109619452	250.813	1044
chr1	109632050	109634899	.	1000	.	-1	292.713	-1	1434	5	5	109632158	109634303	111.514	1329	109632050	109634899	292.713	1432
chr1	109642172	109644260	.	1000	.	-1	427.199	-1	851	5	5	109642383	109644120	134.542	200	109642172	109644260	427.199	868
chr1	109755852	109758516	.	1000	.	-1	183.315	-1	917	5	5	109756128	109757504	57.1857	631	109755852	109758516	183.315	927
chr1	109780755	109786192	.	1000	.	-1	356.225	-1	1676	5	5	109781555	109784383	84.6584	580	109780755	109786192	356.225	1708
chr1	109786904	109794461	.	1000	.	-1	340.178	-1	5573	5	5	109788556	109793476	124.742	875	109786904	109794461	340.178	5580
chr1	109794650	109800919	.	1000	.	-1	221.959	-1	2047	5	5	109795385	109798428	47.237	1317	109794650	109800919	221.959	2043
chr1	109815362	109820953	.	1000	.	-1	311.899	-1	1965	5	5	109815776	109820797	146.795	608	109815362	109820953	311.899	1959
chr1	109824883	109827039	.	1000	.	-1	292.133	-1	1191	5	5	109825044	109826800	116.736	1005	109824883	109827039	292.133	1217
chr1	109939435	109942042	.	1000	.	-1	80.1963	-1	1196	3.15	4.28	109940030	109941419	38.9519	238	109939435	109942042	80.1963	1490
chr1	109966965	109970135	.	1000	.	-1	174.594	-1	1889	5	5	109967207	109969964	69.2222	283	109966965	109970135	174.594	1879
chr1	110026437	110027466	.	1000	.	-1	429.859	-1	282	5	5	110026512	110027430	220.593	202	110026437	110027466	429.859	287
chr1	110036287	110037607	.	1000	.	-1	133.553	-1	506	4.98	5	110036604	110037342	87.3752	175	110036287	110037607	133.553	521
chr1	110051796	110052372	.	1000	.	-1	46.1995	-1	386	1.56	2.76	110051946	110052357	31.5021	263	110051796	110052372	46.1995	360
chr1	110089098	110092107	.	1000	.	-1	224.438	-1	1848	5	5	110089207	110091833	81.9054	457	110089098	110092107	224.438	1836
chr1	110161926	110163890	.	1000	.	-1	100.669	-1	739	2.49	3.65	110162179	110163595	21.6999	454	110161926	110163890	100.669	772
chr1	110266790	110272269	.	1000	.	-1	156.188	-1	1808	4.71	5	110267166	110270309	46.7456	207	110266790	110272269	156.188	1816
chr1	110281540	110283534	.	1000	.	-1	158.751	-1	1218	3.72	4.81	110282313	110283404	31.6206	438	110281540	110283534	158.751	1225
chr1	110501640	110503979	.	1000	.	-1	39.567	-1	1040	1.3	2.5	110501925	110503762	20.4805	264	110501640	110503979	39.567	1364
chr1	110527184	110528461	.	1000	.	-1	315.866	-1	357	5	5	110527342	110528313	124.282	211	110527184	110528461	315.866	346
chr1	110545302	110547604	.	850	.	-1	62.9716	-1	1118	0.87	2.05	110546101	110547379	12.5831	304	110545302	110547604	62.9716	1065
chr1	110576783	110578125	.	1000	.	-1	240.037	-1	647	5	5	110576820	110578069	76.7656	159	110576783	110578125	240.037	631
chr1	110879844	110883323	.	1000	.	-1	351.336	-1	1862	5	5	110880085	110883215	105.535	557	110879844	110883323	351.336	1369
chr1	110949512	110951207	.	1000	.	-1	173.617	-1	600	5	5	110949784	110950844	69.2222	324	110949512	110951207	173.617	604
chr1	111505522	111506683	.	1000	.	-1	175.489	-1	829	5	5	111505823	111506553	57.1963	566	111505522	111506683	175.489	791
chr1	111681884	111683614	.	1000	.	-1	215.961	-1	719	5	5	111682046	111683614	86.9921	577	111681884	111683486	215.961	700
chr1	111745330	111747549	.	1000	.	-1	254.377	-1	1598	5	5	111745417	111747511	58.5674	1487	111745330	111747549	254.377	1622
chr1	111991183	111992887	.	1000	.	-1	141.511	-1	1046	4.91	5	111991262	111992661	58.5674	311	111991183	111992887	141.511	1060
chr1	112050129	112052175	.	914	.	-1	54.4289	-1	667	1.01	2.2	112050501	112050944	13.0753	264	112050129	112052175	54.4289	698
chr1	112161933	112163929	.	1000	.	-1	215.961	-1	746	5	5	112161933	112163416	78.4668	178	112161944	112163929	215.961	745
chr1	112297333	112299357	.	1000	.	-1	176.427	-1	1209	5	5	112297819	112299088	50.4529	887	112297333	112299357	176.427	1045
chr1	112531853	112533079	.	1000	.	-1	52.5628	-1	730	1.96	3.15	112532291	112532963	26.6973	292	112531853	112533079	52.5628	731
chr1	112938035	112939604	.	1000	.	-1	103.145	-1	955	3.7	4.79	112938236	112939348	40.0857	747	112938035	112939604	103.145	963
chr1	113137409	113138791	.	1000	.	-1	48.0842	-1	421	1.71	2.9	113137469	113138370	21.3315	304	113137409	113138791	48.0842	478
chr1	113160643	113163271	.	1000	.	-1	334.12	-1	1693	5	5	113161245	113163055	117.935	1373	113160643	113163271	334.12	1411
chr1	113216620	113218550	.	1000	.	-1	203.991	-1	1012	5	5	113216812	113218306	64.1222	659	113216620	113218550	203.991	1173
chr1	113241100	113244408	.	887	.	-1	33.6764	-1	2117	0.95	2.14	113241197	113244225	16.0706	151	113241100	113244408	33.6764	2110
chr1	113246635	113248954	.	1000	.	-1	106.125	-1	814	3.89	4.98	113247085	113248929	45.2006	388	113246635	113248954	106.125	768
chr1	113249140	113250450	.	1000	.	-1	187.124	-1	415	5	5	113249198	113250098	77.0047	359	113249140	113250450	187.124	414
chr1	113614727	113616787	.	1000	.	-1	190.52	-1	1270	5	5	113615774	113616477	74.1341	210	113614727	113616787	190.52	1283
chr1	113930314	113934557	.	1000	.	-1	232.936	-1	2974	5	5	113930580	113934051	85.8628	663	113930314	113934557	232.936	2989
chr1	114300585	114302644	.	1000	.	-1	256.526	-1	1406	5	5	114301341	114302611	129.543	653	114300585	114302644	256.526	1404
chr1	114353305	114356216	.	1000	.	-1	439.535	-1	1393	5	5	114353796	114355753	217.727	576	114353305	114356216	439.535	1389
chr1	114446641	114449003	.	1000	.	-1	305.123	-1	1460	5	5	114446885	114448552	98.1559	1197	114446641	114449003	305.123	1480
chr1	114471390	114473518	.	1000	.	-1	395.414	-1	1038	5	5	114471390	114473312	192.548	1006	114471405	114473518	395.414	1055
chr1	115052372	115055434	.	1000	.	-1	440.428	-1	1728	5	5	115052672	115055288	290.273	1428	115052372	115055434	440.428	1728
chr1	115123481	115124978	.	1000	.	-1	176.643	-1	1102	5	5	115123745	115124842	61.5907	264	115123481	115124978	176.643	1106
chr1	115258600	115260001	.	1000	.	-1	318.789	-1	593	5	5	115258687	115259454	142.02	487	115258600	115260001	318.789	612
chr1	115298616	115301465	.	1000	.	-1	451.319	-1	1831	5	5	115299333	115301250	321.989	1108	115298616	115301465	451.319	1838
chr1	115322600	115323872	.	1000	.	-1	323.572	-1	575	5	5	115322765	115323808	151.34	422	115322600	115323872	323.572	563
chr1	116184260	116186249	.	1000	.	-1	184.171	-1	688	5	5	116184471	116185869	75.6225	502	116184260	116186249	184.171	664
chr1	116254191	116258324	.	1000	.	-1	133.686	-1	3202	3.63	4.73	116254319	116257671	31.6039	572	116254191	116258324	133.686	3204
chr1	116853715	116856079	.	1000	.	-1	64.8839	-1	1720	2.5	3.66	116854055	116855929	29.7968	1294	116853715	116856079	64.8839	1807
chr1	116915106	116917528	.	1000	.	-1	327.83	-1	1031	5	5	116915234	116917260	119.252	918	116915106	116917528	327.83	1016
chr1	116960278	116961857	.	1000	.	-1	166.224	-1	1142	5	5	116960683	116961651	71.5439	737	116960278	116961857	166.224	1142
chr1	117112741	117114227	.	1000	.	-1	206.66	-1	671	5	5	117113033	117114016	55.8535	466	117112741	117114227	206.66	585
chr1	117209197	117210843	.	1000	.	-1	129.382	-1	937	4.66	5	117209590	117210812	58.5914	370	117209197	117210843	129.382	920
chr1	117395472	117397354	.	1000	.	-1	73.0817	-1	1292	2.24	3.41	117396545	117396996	20.7406	178	117395472	117397354	73.0817	1334
chr1	117452467	117453471	.	1000	.	-1	49.9581	-1	321	1.82	3.01	117452474	117453395	28.1021	389	117452467	117453471	49.9581	247
chr1	117601358	117603624	.	1000	.	-1	332.953	-1	1033	5	5	117601478	117603472	135.269	573	117601358	117603624	332.953	1037
chr1	117663369	117665611	.	1000	.	-1	384.588	-1	1292	5	5	117663591	117665404	195.273	1068	117663369	117665611	384.588	1294
chr1	117750987	117754938	.	1000	.	-1	104.689	-1	2524	1.63	2.83	117751571	117754244	17.0309	2131	117750987	117754938	104.689	2333
chr1	117809245	117815261	.	1000	.	-1	266.634	-1	2871	5	5	117810445	117812767	86.2461	582	117809245	117815261	266.634	2910
chr1	117908379	117911691	.	1000	.	-1	548.823	-1	1337	5	5	117908857	117910541	278.818	859	117908379	117911691	548.823	1337
chr1	118131650	118135173	.	1000	.	-1	107	-1	2507	3.09	4.23	118132527	118135105	27.0013	551	118131650	118135173	107	2225
chr1	118147399	118150069	.	1000	.	-1	122.283	-1	1488	3.33	4.45	118147399	118149758	29.1366	482	118147686	118150069	122.283	1198
chr1	118471448	118473094	.	1000	.	-1	112.125	-1	597	3.12	4.25	118471653	118472652	27.0013	226	118471448	118473094	112.125	585
chr1	119682491	119684365	.	1000	.	-1	256.151	-1	641	5	5	119682708	119683942	110.409	299	119682491	119684365	256.151	630
chr1	120190062	120191356	.	1000	.	-1	60.95	-1	598	2.15	3.33	120190340	120191286	22.3593	222	120190062	120191356	60.95	600
chr1	120254486	120255968	.	1000	.	-1	55.7194	-1	421	1.77	2.95	120254557	120255517	18.1055	154	120254486	120255968	55.7194	617
chr1	120603368	120605226	.	1000	.	-1	89.8492	-1	1212	3.41	4.53	120604415	120605123	39.7432	180	120603368	120605226	89.8492	1197
chr1	120610610	120612927	.	1000	.	-1	372.826	-1	1471	5	5	120610906	120612822	204.724	1206	120610610	120612927	372.826	1440
chr1	120835935	120836873	.	991	.	-1	39.6907	-1	737	1.19	2.39	120836072	120836873	15.091	640	120835935	120836868	39.6907	698
chr1	120836975	120838477	.	1000	.	-1	114.199	-1	1146	4.19	5	120837003	120838323	51.2842	1110	120836975	120838477	114.199	1154
chr1	120838885	120840327	.	1000	.	-1	108.397	-1	270	4.12	5	120838977	120840032	55.77	170	120838885	120840327	108.397	279
chr1	120904264	120905887	.	1000	.	-1	171.594	-1	607	5	5	120904692	120905799	68.8165	181	120904264	120905887	171.594	605
chr1	120906026	120907008	.	1000	.	-1	113.478	-1	293	4.2	5	120906071	120906995	53.6434	162	120906026	120907008	113.478	368
chr1	120924838	120926234	.	1000	.	-1	126.727	-1	973	4.53	5	120925211	120926130	54.903	603	120924838	120926234	126.727	971
chr1	121483772	121485532	.	1000	.	-1	63.944	-1	1298	2.35	3.52	121483772	121485495	54.6162	1309	121483894	121485532	63.944	1165
chr1	142890455	142891069	.	1000	.	-1	57.3829	-1	385	2.16	3.33	142890583	142891009	25.1882	264	142890455	142891069	57.3829	379
chr1	143670515	143670923	.	1000	.	-1	54.7242	-1	202	2.08	3.26	143670558	143670874	33.2871	159	143670515	143670923	54.7242	202
chr1	143672484	143674047	.	1000	.	-1	372.005	-1	907	5	5	143672574	143673919	216.613	803	143672484	143674047	372.005	922
chr1	143686849	143687882	.	1000	.	-1	133.79	-1	351	4.7	5	143687004	143687429	56.0716	168	143686849	143687882	133.79	379
chr1	143742654	143744395	.	1000	.	-1	177.938	-1	842	5	5	143743138	143744311	84.6146	307	143742654	143744395	177.938	893
chr1	143911880	143913219	.	1000	.	-1	150.424	-1	1072	5	5	143911991	143913171	73.6183	956	143911880	143913219	150.424	1078
chr1	143913555	143916220	.	1000	.	-1	191.306	-1	412	5	5	143913744	143915962	67.2862	184	143913555	143916220	191.306	451
chr1	144028751	144030096	.	1000	.	-1	51.9683	-1	462	1.91	3.1	144028873	144029612	24.2713	389	144028751	144030096	51.9683	413
chr1	144310704	144311880	.	1000	.	-1	65.7111	-1	749	2.61	3.77	144311307	144311629	36.3468	159	144310704	144311880	65.7111	737
chr1	144339165	144340752	.	1000	.	-1	107.793	-1	793	4.17	5	144339425	144340714	64.9331	524	144339165	144340752	107.793	803
chr1	144491095	144492005	.	1000	.	-1	77.245	-1	592	2.86	4.01	144491533	144491858	30.3177	157	144491095	144492005	77.245	589
chr1	144519497	144520844	.	1000	.	-1	95.5228	-1	784	3.26	4.39	144519671	144520689	31.5523	795	144519497	144520844	95.5228	599
chr1	144593236	144594427	.	1000	.	-1	175.243	-1	624	5	5	144593267	144594378	82.4079	604	144593236	144594427	175.243	614
chr1	144930648	144933842	.	1000	.	-1	356.392	-1	1644	5	5	144931402	144933499	238.62	887	144930648	144933842	356.392	1647
chr1	145096061	145097081	.	1000	.	-1	136.656	-1	541	3.91	5	145096447	145096818	35.5561	167	145096061	145097081	136.656	529
chr1	145139015	145140205	.	1000	.	-1	177.554	-1	449	5	5	145139138	145140086	86.9895	336	145139015	145140205	177.554	440
chr1	145208508	145210851	.	1000	.	-1	389.147	-1	1008	5	5	145208607	145210622	214.606	989	145208508	145210851	389.147	929
chr1	145216063	145218211	.	1000	.	-1	100.384	-1	777	3.46	4.58	145216263	145217045	34.6823	622	145216063	145218211	100.384	733
chr1	145381922	145383468	.	1000	.	-1	358.528	-1	663	5	5	145382171	145383387	191.575	413	145381922	145383468	358.528	665
chr1	145395505	145397909	.	1000	.	-1	158.589	-1	438	4.42	5	145395654	145397776	41.184	281	145395505	145397909	158.589	370
chr1	145437823	145439508	.	1000	.	-1	90.5803	-1	885	3.4	4.52	145437966	145439508	37.805	257	145437823	145439356	90.5803	808
chr1	145454225	145456580	.	1000	.	-1	196.888	-1	1544	5	5	145454771	145456489	79.13	273	145454225	145456580	196.888	1551
chr1	145469682	145471314	.	1000	.	-1	111.814	-1	1006	3.98	5	145469782	145471083	44.5401	280	145469682	145471314	111.814	1011
chr1	145506120	145508821	.	1000	.	-1	458.008	-1	1164	5	5	145506545	145508584	199.288	771	145506120	145508821	458.008	1132
chr1	145514759	145517446	.	1000	.	-1	352.112	-1	1445	5	5	145514899	145517066	113.674	1314	145514759	145517446	352.112	1436
chr1	145541540	145545193	.	1000	.	-1	251.967	-1	1743	5	5	145542056	145545069	88.5549	627	145541540	145545193	251.967	1756
chr1	145574689	145576771	.	1000	.	-1	210.993	-1	853	5	5	145574789	145576662	81.8675	755	145574689	145576771	210.993	851
chr1	145588525	145589624	.	1000	.	-1	224.174	-1	732	5	5	145588525	145589500	99.9359	746	145588683	145589624	224.174	560
chr1	145609768	145611727	.	1000	.	-1	389.049	-1	1389	5	5	145609871	145611644	175.932	1295	145609768	145611727	389.049	1381
chr1	145825922	145827674	.	1000	.	-1	202.913	-1	911	5	5	145826379	145827600	71.4039	271	145825922	145827674	202.913	877
chr1	145968413	145970556	.	1000	.	-1	435.273	-1	1123	5	5	145968598	145970419	294.866	939	145968413	145970556	435.273	1123
chr1	146081261	146083359	.	1000	.	-1	244.911	-1	1161	5	5	146081780	146083022	53.1825	629	146081261	146083359	244.911	1175
chr1	146372887	146375204	.	1000	.	-1	214.034	-1	1191	5	5	146372887	146374706	65.8974	282	146373079	146375204	214.034	1067
chr1	146555655	146557056	.	1000	.	-1	298.026	-1	763	5	5	146556037	146556841	128.964	379	146555655	146557056	298.026	765
chr1	146642712	146645415	.	1000	.	-1	281.385	-1	1490	5	5	146643186	146645224	113.919	678	146642712	146645415	281.385	1828
chr1	146713763	146715525	.	1000	.	-1	401.692	-1	794	5	5	146713830	146715429	184.677	204	146713763	146715525	401.692	805
chr1	147070943	147072743	.	1000	.	-1	162.887	-1	1210	5	5	147071078	147072479	83.3454	1037	147070943	147072743	162.887	1249
chr1	147141472	147143397	.	1000	.	-1	160.346	-1	1124	4.87	5	147141746	147143246	49.2926	354	147141472	147143397	160.346	791
chr1	147188443	147190215	.	1000	.	-1	148.285	-1	1145	3.38	4.5	147188450	147190072	28.874	154	147188443	147190215	148.285	1144
chr1	147399827	147401534	.	1000	.	-1	176.53	-1	912	5	5	147400467	147401195	49.4836	260	147399827	147401534	176.53	925
chr1	147510252	147512299	.	1000	.	-1	416.174	-1	1035	5	5	147510488	147512182	272.66	248	147510252	147512299	416.174	1031
chr1	147623070	147625125	.	1000	.	-1	222.89	-1	1185	5	5	147623530	147624922	59.9457	737	147623070	147625125	222.89	1173
chr1	147735039	147737272	.	1000	.	-1	389.049	-1	603	5	5	147735243	147737182	187.306	274	147735039	147737272	389.049	589
chr1	147805711	147807813	.	1000	.	-1	310.476	-1	1303	5	5	147806068	147807488	159.335	951	147805711	147807813	310.476	1298
chr1	147859991	147861584	.	1000	.	-1	386.053	-1	918	5	5	147860115	147861401	204.415	781	147859991	147861584	386.053	932
chr1	147874315	147875227	.	1000	.	-1	153.505	-1	399	5	5	147874453	147874938	70.8003	264	147874315	147875227	153.505	396
chr1	147930411	147931943	.	1000	.	-1	185.52	-1	867	5	5	147930772	147931862	122.165	493	147930411	147931943	185.52	881
chr1	147993195	147995836	.	1000	.	-1	356.168	-1	824	5	5	147993318	147995231	183.019	700	147993195	147995836	356.168	826
chr1	147999427	148001179	.	1000	.	-1	291.158	-1	1100	5	5	147999685	148000782	136.122	844	147999427	148001179	291.158	1099
chr1	148175960	148176917	.	1000	.	-1	62.9373	-1	493	2.46	3.62	148176062	148176837	43.1027	382	148175960	148176917	62.9373	502
chr1	148240498	148243223	.	1000	.	-1	320.799	-1	793	5	5	148240657	148243142	165.626	630	148240498	148243223	320.799	798
chr1	148246930	148248541	.	1000	.	-1	362.865	-1	925	5	5	148247005	148248114	207.816	849	148246930	148248541	362.865	927
chr1	148555417	148557279	.	1000	.	-1	244.518	-1	779	5	5	148555577	148556912	114.053	670	148555417	148557279	244.518	728
chr1	148598031	148599688	.	1000	.	-1	343.941	-1	644	5	5	148598346	148599676	156.493	305	148598031	148599688	343.941	669
chr1	148603384	148606058	.	1000	.	-1	271.563	-1	1875	5	5	148603559	148605899	119.616	735	148603384	148606058	271.563	1870
chr1	148759976	148761868	.	1000	.	-1	236.27	-1	949	5	5	148760401	148761573	134.596	299	148759976	148761868	236.27	1174
chr1	148765419	148768140	.	1000	.	-1	234.516	-1	1829	5	5	148765511	148768140	159.067	1726	148765419	148768099	234.516	1841
chr1	148928269	148929004	.	1000	.	-1	50.8246	-1	234	1.62	2.82	148928362	148928684	17.673	152	148928269	148929004	50.8246	223
chr1	149215249	149216326	.	1000	.	-1	163.315	-1	661	5	5	149215413	149216251	82.5519	438	149215249	149216326	163.315	720
chr1	149222307	149225576	.	1000	.	-1	421.104	-1	2059	5	5	149222448	149225180	246.886	1915	149222307	149225576	421.104	2063
chr1	149379238	149380435	.	1000	.	-1	101.566	-1	259	3.97	5	149379290	149380195	68.1492	234	149379238	149380435	101.566	253
chr1	149398444	149399187	.	1000	.	-1	101.876	-1	388	3.84	4.94	149398560	149399179	47.047	273	149398444	149399187	101.876	388
chr1	149399346	149400638	.	1000	.	-1	137.674	-1	610	5	5	149399415	149400570	74.1315	645	149399346	149400638	137.674	507
chr1	149512631	149515230	.	1000	.	-1	201.885	-1	1787	5	5	149512939	149515091	95.6731	1442	149512631	149515230	201.885	1824
chr1	149576499	149577950	.	1000	.	-1	132.143	-1	679	4.79	5	149576577	149577950	62.8829	561	149576499	149577950	132.143	720
chr1	149605297	149606392	.	1000	.	-1	189.376	-1	484	5	5	149605388	149606108	110.326	403	149605297	149606392	189.376	474
chr1	149763984	149765711	.	1000	.	-1	233.79	-1	359	5	5	149764106	149765414	105.246	239	149763984	149765711	233.79	357
chr1	149782063	149786097	.	1000	.	-1	392.347	-1	2784	5	5	149782338	149786024	236.536	1286	149782063	149786097	392.347	2793
chr1	149801726	149817659	.	1000	.	-1	588.139	-1	11677	5	5	149802418	149817267	305.566	1976	149801726	149817659	588.139	11640
chr1	149819014	149835217	.	1000	.	-1	513.149	-1	4291	5	5	149819115	149835166	321.574	1115	149819014	149835217	513.149	4516
chr1	149855239	149861482	.	1000	.	-1	537.822	-1	3424	5	5	149855822	149861192	282.247	2856	149855239	149861482	537.822	3409
chr1	149870873	149872333	.	1000	.	-1	321.205	-1	420	5	5	149871099	149872204	138.738	184	149870873	149872333	321.205	430
chr1	149898712	149900802	.	1000	.	-1	435.261	-1	1286	5	5	149898979	149900563	222.395	1032	149898712	149900802	435.261	1273
chr1	149907865	149912622	.	1000	.	-1	323.712	-1	2982	5	5	149908119	149912018	109.25	2776	149907865	149912622	323.712	2934
chr1	149981051	149983288	.	1000	.	-1	316.403	-1	1464	5	5	149981961	149983145	120.759	555	149981051	149983288	316.403	1463
chr1	150038566	150040674	.	1000	.	-1	361.246	-1	1003	5	5	150038761	150040361	168.28	817	150038566	150040674	361.246	995
chr1	150121681	150122929	.	923	.	-1	37.4005	-1	232	1.04	2.22	150121707	150122834	25.3906	187	150121681	150122929	37.4005	348
chr1	150185374	150186602	.	1000	.	-1	65.1176	-1	823	2.14	3.32	150185501	150186356	20.8114	194	150185374	150186602	65.1176	835
chr1	150206917	150209616	.	1000	.	-1	113.56	-1	1964	4.29	5	150206982	150209444	60.6243	753	150206917	150209616	113.56	1973
chr1	150240086	150242152	.	1000	.	-1	412.873	-1	1129	5	5	150240322	150241917	130.919	523	150240086	150242152	412.873	1122
chr1	150253702	150255634	.	1000	.	-1	100.6	-1	617	2.17	3.35	150253866	150255230	19.3223	265	150253702	150255634	100.6	662
chr1	150265639	150267483	.	1000	.	-1	229.101	-1	810	5	5	150265829	150267195	75.6664	630	150265639	150267483	229.101	800
chr1	150293094	150295209	.	1000	.	-1	445.635	-1	1097	5	5	150293278	150294887	193.151	857	150293094	150295209	445.635	1154
chr1	150335008	150338919	.	1000	.	-1	514.586	-1	1843	5	5	150335131	150338493	268.39	1699	150335008	150338919	514.586	1864
chr1	150459251	150460571	.	1000	.	-1	127.334	-1	790	4.69	5	150459324	150460466	65.2238	209	150459251	150460571	127.334	793
chr1	150487527	150488767	.	1000	.	-1	80.491	-1	362	2.92	4.07	150487588	150488706	30.1619	239	150487527	150488767	80.491	345
chr1	150521056	150521794	.	1000	.	-1	54.6671	-1	518	2.03	3.22	150521056	150521739	24.2178	513	150521107	150521794	54.6671	473
chr1	150532929	150537235	.	1000	.	-1	493.794	-1	1330	5	5	150533082	150536717	239.817	1174	150532929	150537235	493.794	1333
chr1	150539405	150541829	.	1000	.	-1	101.252	-1	1780	2.99	4.13	150539950	150541615	26.4438	384	150539405	150541829	101.252	1717
chr1	150549934	150553011	.	1000	.	-1	461.314	-1	1949	5	5	150550595	150552977	220.69	1309	150549934	150553011	461.314	1929
chr1	150595052	150598321	.	1000	.	-1	87.6155	-1	2150	2.94	4.08	150595395	150597603	27.9292	357	150595052	150598321	87.6155	2168
chr1	150600606	150603261	.	1000	.	-1	436.072	-1	1320	5	5	150600891	150602939	240.03	1041	150600606	150603261	436.072	1314
chr1	150668833	150669715	.	1000	.	-1	129.213	-1	640	2.51	3.67	150669197	150669640	22.0724	267	150668833	150669715	129.213	649
chr1	150848180	150850119	.	1000	.	-1	188.007	-1	811	5	5	150848505	150849904	86.8015	332	150848180	150850119	188.007	822
chr1	150897620	150899812	.	1000	.	-1	372.89	-1	1368	5	5	150897766	150899503	170.181	474	150897620	150899812	372.89	1373
chr1	150942159	150947954	.	1000	.	-1	363.322	-1	4910	5	5	150942913	150947832	240.765	946	150942159	150947954	363.322	4911
chr1	150951501	150956243	.	1000	.	-1	182.378	-1	2588	5	5	150951524	150956051	69.9775	507	150951501	150956243	182.378	2622
chr1	150977632	150981909	.	1000	.	-1	178.594	-1	3479	5	5	150978703	150981601	55.0203	204	150977632	150981909	178.594	3486
chr1	151019579	151021499	.	1000	.	-1	386.738	-1	1086	5	5	151019777	151021416	140.431	1091	151019579	151021499	386.738	883
chr1	151030305	151033001	.	1000	.	-1	470.221	-1	1627	5	5	151030354	151032853	232.098	660	151030305	151033001	470.221	1633
chr1	151041994	151044553	.	1000	.	-1	527.851	-1	1425	5	5	151042224	151044250	298.115	1211	151041994	151044553	527.851	1410
chr1	151137685	151139583	.	1000	.	-1	178.27	-1	1073	5	5	151137977	151139294	64.2673	230	151137685	151139583	178.27	1090
chr1	151161826	151163337	.	1000	.	-1	267.901	-1	723	5	5	151161857	151163199	123.921	684	151161826	151163337	267.901	731
chr1	151167176	151172548	.	1000	.	-1	352.315	-1	4135	5	5	151168010	151172396	159.508	1260	151167176	151172548	352.315	4111
chr1	151226494	151228604	.	1000	.	-1	374.888	-1	900	5	5	151226579	151227886	190.428	815	151226494	151228604	374.888	901
chr1	151253210	151256627	.	1000	.	-1	490.974	-1	1672	5	5	151253402	151256627	239.036	575	151253210	151256592	490.974	1700
chr1	151298672	151301150	.	1000	.	-1	402.271	-1	1330	5	5	151299372	151300898	192.72	615	151298672	151301150	402.271	1345
chr1	151318508	151320904	.	1000	.	-1	242.358	-1	1079	5	5	151318826	151320541	100.585	767	151318508	151320904	242.358	1073
chr1	151343529	151345677	.	1000	.	-1	182.428	-1	1470	5	5	151343981	151345258	74.0296	341	151343529	151345677	182.428	1470
chr1	151371298	151372956	.	1000	.	-1	225.056	-1	942	5	5	151371367	151372956	109.201	871	151371298	151372934	225.056	945
chr1	151429827	151432722	.	1000	.	-1	435.781	-1	1900	5	5	151429827	151432501	223.403	1860	151429838	151432722	435.781	1930
chr1	151445188	151446442	.	1000	.	-1	273.253	-1	818	5	5	151445560	151446442	101.649	408	151445188	151446442	273.253	857
chr1	151483332	151487766	.	1000	.	-1	290.839	-1	1824	5	5	151483340	151487294	100.62	193	151483332	151487766	290.839	2933
chr1	151511433	151513923	.	1000	.	-1	390.251	-1	1059	5	5	151511586	151513843	165.483	911	151511433	151513923	390.251	1055
chr1	151584176	151585395	.	1000	.	-1	391.988	-1	462	5	5	151584378	151585394	177.191	255	151584176	151585395	391.988	467
chr1	151711181	151712654	.	1000	.	-1	90.7129	-1	1045	3.4	4.53	151711377	151712553	37.805	691	151711181	151712654	90.7129	1203
chr1	151735026	151737003	.	1000	.	-1	248.467	-1	816	5	5	151735195	151736677	116.011	651	151735026	151737003	248.467	813
chr1	151762150	151764468	.	1000	.	-1	266.19	-1	1099	5	5	151762453	151764207	73.3776	376	151762150	151764468	266.19	1557
chr1	151803381	151805881	.	1000	.	-1	42.3357	-1	243	1.4	2.6	151803448	151805195	18.4425	168	151803381	151805881	42.3357	294
chr1	151808409	151810644	.	1000	.	-1	113.591	-1	1525	3.56	4.68	151808783	151810524	33.6228	197	151808409	151810644	113.591	1531
chr1	151811284	151813425	.	1000	.	-1	384.044	-1	1243	5	5	151811684	151813234	153.545	828	151811284	151813425	384.044	1259
chr1	151881236	151882714	.	1000	.	-1	223.865	-1	1037	5	5	151881486	151882663	89.2837	785	151881236	151882714	223.865	1039
chr1	151961171	151967111	.	1000	.	-1	273.372	-1	4922	5	5	151961257	151967005	135.004	903	151961171	151967111	273.372	4932
chr1	152006180	152010021	.	1000	.	-1	436.166	-1	1968	5	5	152006590	152009898	146.797	1553	152006180	152010021	436.166	1974
chr1	152018690	152021897	.	1000	.	-1	330.749	-1	1791	5	5	152019064	152021756	117.419	1032	152018690	152021897	330.749	2176
chr1	152081613	152084061	.	1000	.	-1	184.16	-1	1317	5	5	152081904	152084061	57.4894	1222	152081613	152084059	184.16	1122
chr1	153094831	153096388	.	1000	.	-1	123.776	-1	1002	3.18	4.32	153095108	153096335	27.1595	221	153094831	153096388	123.776	988
chr1	153336800	153338645	.	856	.	-1	33.5112	-1	704	0.88	2.06	153336894	153338610	19.1467	408	153336800	153338645	33.5112	772
chr1	153537859	153539935	.	1000	.	-1	81.9152	-1	1306	2.7	3.86	153537859	153539870	24.9461	607	153537985	153539935	81.9152	886
chr1	153579816	153584039	.	1000	.	-1	256.778	-1	1259	5	5	153579898	153583672	101.056	1162	153579816	153584039	256.778	1274
chr1	153587621	153589828	.	1000	.	-1	50.5999	-1	1252	1.79	2.98	153587941	153589363	21.2741	1154	153587621	153589828	50.5999	1031
chr1	153598253	153600744	.	1000	.	-1	266.473	-1	1481	5	5	153599010	153600019	96.4448	729	153598253	153600744	266.473	1476
chr1	153605513	153608929	.	1000	.	-1	591.852	-1	1208	5	5	153605996	153608275	306.874	718	153605513	153608929	591.852	1215
chr1	153630728	153632371	.	1000	.	-1	303.033	-1	536	5	5	153631040	153631822	182.647	239	153630728	153632371	303.033	522
chr1	153642407	153643596	.	1000	.	-1	203.429	-1	856	5	5	153642730	153643512	48.5949	587	153642407	153643596	203.429	802
chr1	153699663	153701404	.	1000	.	-1	444.503	-1	1085	5	5	153699710	153701340	187.07	322	153699663	153701404	444.503	1095
chr1	153747218	153749227	.	1000	.	-1	334.234	-1	1100	5	5	153747244	153749112	138.64	546	153747218	153749227	334.234	1143
chr1	153755321	153756870	.	1000	.	-1	365.35	-1	755	5	5	153755505	153756594	120.964	348	153755321	153756870	365.35	741
chr1	153894156	153896944	.	1000	.	-1	279.742	-1	1341	5	5	153894156	153896820	114.223	645	153894219	153896944	279.742	874
chr1	153917936	153919847	.	1000	.	-1	449.143	-1	962	5	5	153918031	153919433	211.378	839	153917936	153919847	449.143	991
chr1	153929927	153931312	.	1000	.	-1	333.406	-1	988	5	5	153930162	153931206	128.201	765	153929927	153931312	333.406	976
chr1	153934534	153937946	.	1000	.	-1	349.235	-1	1388	5	5	153934662	153937436	173.384	1273	153934534	153937946	349.235	1376
chr1	153938360	153941554	.	1000	.	-1	372.997	-1	1699	5	5	153938734	153941341	125.541	1331	153938360	153941554	372.997	1694
chr1	153948663	153951265	.	1000	.	-1	421.178	-1	1350	5	5	153949221	153950816	182.17	815	153948663	153951265	421.178	1327
chr1	153957880	153960218	.	1000	.	-1	108.208	-1	710	3.61	4.71	153958249	153960084	35.4155	208	153957880	153960218	108.208	709
chr1	153962669	153964506	.	1000	.	-1	334.277	-1	740	5	5	153962669	153964135	146.379	240	153962669	153964506	334.277	748
chr1	154153932	154156536	.	1000	.	-1	195.512	-1	1530	5	5	154154366	154156257	68.3594	1100	154153932	154156536	195.512	1527
chr1	154191733	154194839	.	1000	.	-1	383.562	-1	1148	5	5	154192190	154194363	157.761	468	154191733	154194839	383.562	1143
chr1	154244251	154245877	.	1000	.	-1	170.548	-1	1014	5	5	154244500	154245546	54.4762	731	154244251	154245877	170.548	1049
chr1	154530060	154532467	.	1000	.	-1	252.618	-1	782	5	5	154530198	154532102	90.0517	701	154530060	154532467	252.618	726
chr1	154579729	154581684	.	1000	.	-1	315.935	-1	810	5	5	154579785	154581510	121.527	771	154579729	154581684	315.935	794
chr1	154599178	154600967	.	1000	.	-1	214.243	-1	1015	5	5	154599403	154600798	51.7862	754	154599178	154600967	214.243	1051
chr1	154908290	154910826	.	1000	.	-1	377.439	-1	1010	5	5	154908657	154910491	159.212	651	154908290	154910826	377.439	1002
chr1	154933042	154935683	.	1000	.	-1	522.568	-1	1327	5	5	154933635	154935202	225.999	737	154933042	154935683	522.568	1325
chr1	154942613	154949749	.	1000	.	-1	398.898	-1	4154	5	5	154942967	154948794	164.54	562	154942613	154949749	398.898	4146
chr1	154955734	154957132	.	1000	.	-1	88.5535	-1	272	2.54	3.71	154955809	154956544	22.3944	164	154955734	154957132	88.5535	306
chr1	154971312	154979658	.	1000	.	-1	493.001	-1	3543	5	5	154971479	154978110	181.721	2075	154971312	154979658	493.001	2978
chr1	154983318	154984694	.	870	.	-1	40.7255	-1	1033	0.91	2.1	154984226	154984532	12.2094	134	154983318	154984694	40.7255	1024
chr1	154988953	154991189	.	1000	.	-1	97.2577	-1	1007	2.52	3.68	154989278	154990628	22.068	1046	154988953	154991189	97.2577	643
chr1	155022355	155024617	.	1000	.	-1	153.334	-1	1109	4.86	5	155022814	155024549	51.7862	407	155022355	155024617	153.334	1075
chr1	155035269	155037141	.	1000	.	-1	274.032	-1	1082	5	5	155035373	155037141	82.8875	265	155035269	155037089	274.032	1078
chr1	155050635	155059124	.	1000	.	-1	319.629	-1	5904	5	5	155051327	155059072	68.781	961	155050635	155059124	319.629	4887
chr1	155096496	155103473	.	1000	.	-1	256.164	-1	3788	5	5	155096496	155103296	77.0047	345	155096607	155103473	256.164	3920
chr1	155106803	155110227	.	1000	.	-1	304.9	-1	1194	5	5	155107659	155109581	94.9176	312	155106803	155110227	304.9	1220
chr1	155111435	155113269	.	1000	.	-1	162.01	-1	1257	5	5	155111766	155113237	52.5099	308	155111435	155113269	162.01	1311
chr1	155144938	155146135	.	1000	.	-1	205.693	-1	657	5	5	155145190	155145848	72.6543	417	155144938	155146135	205.693	646
chr1	155148415	155151299	.	1000	.	-1	299.076	-1	1135	5	5	155149284	155150624	68.3594	227	155148415	155151299	299.076	1154
chr1	155161091	155165252	.	1000	.	-1	165.634	-1	2221	4.55	5	155161219	155165252	42.6253	310	155161091	155165187	165.634	1985
chr1	155177949	155179547	.	1000	.	-1	288.67	-1	797	5	5	155178080	155179445	87.3587	656	155177949	155179547	288.67	808
chr1	155193994	155198349	.	1000	.	-1	174.594	-1	3405	5	5	155194223	155198171	64.1222	351	155193994	155198349	174.594	3105
chr1	155213406	155215668	.	1000	.	-1	119.721	-1	899	4.24	5	155213868	155215410	49.0568	458	155213406	155215668	119.721	878
chr1	155224421	155225679	.	1000	.	-1	122.737	-1	685	4.06	5	155224421	155225555	41.3509	668	155224441	155225679	122.737	682
chr1	155230973	155232802	.	1000	.	-1	178.798	-1	936	5	5	155231297	155232584	52.5099	381	155230973	155232802	178.798	934
chr1	155242402	155244088	.	1000	.	-1	395.054	-1	732	5	5	155242474	155243968	146.033	658	155242402	155244088	395.054	734
chr1	155247162	155248413	.	1000	.	-1	80.0418	-1	219	2.54	3.71	155247181	155248042	23.4582	218	155247162	155248413	80.0418	202
chr1	155277443	155280112	.	1000	.	-1	187.114	-1	1402	5	5	155277443	155279821	104.155	511	155277544	155280112	187.114	1295
chr1	155292425	155295803	.	1000	.	-1	235.123	-1	1002	5	5	155292566	155295377	86.9921	866	155292425	155295803	235.123	997
chr1	155531105	155534771	.	1000	.	-1	433.78	-1	1779	5	5	155531602	155534371	195.692	812	155531105	155534771	433.78	1780
chr1	155578973	155580648	.	1000	.	-1	106.125	-1	691	3.92	5	155579437	155580391	46.5012	198	155578973	155580648	106.125	687
chr1	155657005	155661137	.	1000	.	-1	379.488	-1	1729	5	5	155657439	155660385	188.788	719	155657005	155661137	379.488	1745
chr1	155714848	155716162	.	1000	.	-1	63.6048	-1	885	2.52	3.68	155715125	155716020	35.1201	153	155714848	155716162	63.6048	900
chr1	155826447	155827636	.	1000	.	-1	80.0418	-1	300	1.53	2.72	155826578	155827416	15.9725	153	155826447	155827636	80.0418	306
chr1	155880140	155881700	.	1000	.	-1	92.8867	-1	819	3.32	4.44	155880392	155881485	33.9036	612	155880140	155881700	92.8867	774
chr1	155903034	155905324	.	1000	.	-1	252.618	-1	972	5	5	155903451	155904976	84.3724	397	155903034	155905324	252.618	936
chr1	155989919	155990885	.	1000	.	-1	124.434	-1	631	4.17	5	155990139	155990754	43.5076	429	155989919	155990885	124.434	614
chr1	156022706	156025496	.	1000	.	-1	345.702	-1	1151	5	5	156022893	156025351	99.4446	959	156022706	156025496	345.702	1157
chr1	156030098	156032080	.	1000	.	-1	71.7184	-1	795	2.67	3.83	156030249	156031814	27.9829	885	156030098	156032080	71.7184	555
chr1	156083502	156087594	.	1000	.	-1	173.839	-1	1770	4.18	5	156084110	156086481	36.3468	1652	156083502	156087594	173.839	1280
chr1	156091330	156097606	.	1000	.	-1	116.898	-1	2097	3.32	4.44	156092370	156097084	29.1445	263	156091330	156097606	116.898	2577
chr1	156098956	156100690	.	959	.	-1	38.3396	-1	980	1.11	2.31	156099569	156100078	14.8897	388	156098956	156100690	38.3396	960
chr1	156162870	156164565	.	1000	.	-1	132.358	-1	557	4.21	5	156163039	156164447	41.8588	280	156162870	156164565	132.358	537
chr1	156182192	156183976	.	1000	.	-1	292.575	-1	729	5	5	156182341	156183543	167.95	583	156182192	156183976	292.575	726
chr1	156251294	156253574	.	1000	.	-1	279.113	-1	1153	5	5	156251607	156253365	132.853	844	156251294	156253574	279.113	1150
chr1	156254050	156255360	.	1000	.	-1	54.4289	-1	262	1.68	2.86	156254143	156254532	17.2324	173	156254050	156255360	54.4289	259
chr1	156306640	156309213	.	1000	.	-1	236.351	-1	1795	5	5	156307322	156309030	116.736	349	156306640	156309213	236.351	1816
chr1	156425940	156428013	.	1000	.	-1	330.038	-1	838	5	5	156426421	156427761	127.974	330	156425940	156428013	330.038	822
chr1	156440796	156442959	.	1000	.	-1	59.6323	-1	1182	1.73	2.92	156441231	156442544	17.0799	272	156440796	156442959	59.6323	1125
chr1	156469248	156471889	.	1000	.	-1	483.041	-1	1717	5	5	156470055	156471538	151.063	276	156469248	156471889	483.041	1730
chr1	156473433	156475820	.	1000	.	-1	76.1145	-1	1244	2.21	3.39	156474325	156475701	20.2031	339	156473433	156475820	76.1145	1258
chr1	156560969	156562229	.	1000	.	-1	104.636	-1	797	3.94	5	156561108	156562098	49.8921	623	156560969	156562229	104.636	832
chr1	156570346	156571902	.	1000	.	-1	73.0864	-1	786	2.85	4	156570693	156571808	33.9036	484	156570346	156571902	73.0864	741
chr1	156659065	156666801	.	1000	.	-1	395.054	-1	4268	5	5	156659534	156665117	127.974	1003	156659065	156666801	395.054	4486
chr1	156671741	156676351	.	1000	.	-1	205.693	-1	3196	5	5	156672900	156675871	49.1275	836	156671741	156676351	205.693	3316
chr1	156697265	156699249	.	1000	.	-1	420.154	-1	1132	5	5	156697821	156699085	173.09	583	156697265	156699249	420.154	1126
chr1	156710017	156710983	.	1000	.	-1	110.619	-1	715	3.09	4.22	156710216	156710895	26.8331	523	156710017	156710983	110.619	709
chr1	156711088	156711752	.	1000	.	-1	62.2742	-1	301	1.84	3.03	156711221	156711663	18.1055	148	156711088	156711752	62.2742	322
chr1	156715752	156722622	.	1000	.	-1	467.178	-1	5221	5	5	156716114	156722502	176.533	4852	156715752	156722622	467.178	5229
chr1	156735562	156738583	.	1000	.	-1	325.17	-1	1911	5	5	156735930	156738313	119.926	519	156735562	156738583	325.17	1928
chr1	157014671	157016286	.	1000	.	-1	87.1269	-1	639	3.32	4.44	157014989	157016238	38.8298	336	157014671	157016286	87.1269	625
chr1	157101562	157102579	.	986	.	-1	41.9594	-1	711	1.18	2.38	157101664	157102489	14.3118	142	157101562	157102579	41.9594	644
chr1	157107435	157108895	.	1000	.	-1	111.387	-1	570	3.67	4.77	157107469	157108780	36.0174	542	157107435	157108895	111.387	565
chr1	159750577	159751448	.	1000	.	-1	100.195	-1	424	3.31	4.43	159750716	159751192	31.5021	300	159750577	159751448	100.195	410
chr1	159869517	159871906	.	1000	.	-1	92.8867	-1	681	3.26	4.38	159869940	159871550	32.6975	263	159869517	159871906	92.8867	672
chr1	159892653	159895845	.	1000	.	-1	245.553	-1	2219	5	5	159893934	159895323	72.6543	260	159892653	159895845	245.553	2242
chr1	159914675	159917014	.	1000	.	-1	229.798	-1	1014	5	5	159915080	159916819	123.133	471	159914675	159917014	229.798	1028
chr1	160175010	160175784	.	1000	.	-1	60.95	-1	303	1.94	3.13	160175145	160175735	19.1467	175	160175010	160175784	60.95	297
chr1	160231346	160233041	.	1000	.	-1	200.595	-1	723	5	5	160231522	160232840	68.3594	337	160231346	160233041	200.595	718
chr1	160254303	160255069	.	1000	.	-1	84.2716	-1	430	2.77	3.93	160254303	160254935	25.6955	468	160254360	160255069	84.2716	335
chr1	160312453	160313907	.	1000	.	-1	118.193	-1	839	4.28	5	160312579	160313713	51.7862	714	160312453	160313907	118.193	838
chr1	160989875	160991046	.	1000	.	-1	119.721	-1	912	3.68	4.78	160990037	160990949	33.9036	723	160989875	160991046	119.721	940
chr1	160991128	160991954	.	1000	.	-1	59.6323	-1	327	2.07	3.25	160991302	160991763	21.2741	196	160991128	160991954	59.6323	285
chr1	161007421	161009324	.	1000	.	-1	277.631	-1	1072	5	5	161007421	161008790	77.0047	1042	161007497	161009324	277.631	1026
chr1	161014391	161016650	.	1000	.	-1	143.095	-1	1560	4.9	5	161014691	161016426	57.1963	1274	161014391	161016650	143.095	1547
chr1	161052073	161057263	.	1000	.	-1	58.3212	-1	1074	2.16	3.34	161052316	161057236	24.5704	757	161052073	161057263	58.3212	1068
chr1	161058249	161060217	.	1000	.	-1	136.772	-1	898	4.4	5	161058249	161059789	45.2006	897	161058258	161060217	136.772	890
chr1	161067669	161068796	.	1000	.	-1	41.9315	-1	667	1.41	2.6	161068178	161068703	21.2741	119	161067669	161068796	41.9315	706
chr1	161086930	161089295	.	1000	.	-1	68.9897	-1	1107	2.65	3.81	161087463	161088470	30.3177	567	161086930	161089295	68.9897	1115
chr1	161101586	161103990	.	1000	.	-1	215.961	-1	863	5	5	161101669	161103390	113.564	768	161101586	161103990	215.961	876
chr1	161122926	161124747	.	1000	.	-1	214.243	-1	982	5	5	161123093	161124622	102.603	820	161122926	161124747	214.243	977
chr1	161128686	161129998	.	1000	.	-1	160.75	-1	794	5	5	161128866	161129823	59.9457	612	161128686	161129998	160.75	797
chr1	161146667	161147821	.	1000	.	-1	62.2742	-1	485	1.21	2.41	161146819	161147606	14.1034	412	161146667	161147821	62.2742	407
chr1	161171493	161172851	.	1000	.	-1	110.619	-1	853	4.05	5	161171679	161172623	47.8102	196	161171493	161172851	110.619	857
chr1	161283559	161284804	.	1000	.	-1	105.616	-1	800	3.06	4.2	161283775	161284587	26.8331	570	161283559	161284804	105.616	814
chr1	161359320	161359888	.	1000	.	-1	49.3383	-1	248	1.24	2.44	161359320	161359686	14.1034	184	161359350	161359888	49.3383	283
chr1	161368059	161370392	.	1000	.	-1	231.538	-1	1233	5	5	161368450	161370324	71.2164	840	161368059	161370392	231.538	1235
chr1	161410010	161410683	.	1000	.	-1	67.5265	-1	427	2.46	3.62	161410010	161410628	25.6955	419	161410191	161410683	67.5265	255
chr1	161417086	161417428	.	979	.	-1	37.831	-1	169	1.16	2.36	161417134	161417411	17.0112	124	161417086	161417428	37.831	166
chr1	161417563	161418094	.	1000	.	-1	58.9913	-1	205	1.74	2.93	161417593	161418018	17.2531	172	161417563	161418094	58.9913	209
chr1	161424970	161425505	.	1000	.	-1	57.2609	-1	189	2.09	3.27	161424982	161425395	23.18	153	161424970	161425505	57.2609	214
chr1	161432378	161432932	.	1000	.	-1	53.2448	-1	223	1.58	2.77	161432388	161432819	16.5789	232	161432378	161432932	53.2448	204
chr1	161439755	161440224	.	1000	.	-1	49.724	-1	231	1.82	3.01	161439809	161440201	25.1382	178	161439755	161440224	49.724	230
chr1	161695871	161696855	.	1000	.	-1	70.3462	-1	736	2.05	3.24	161696038	161696851	19.1467	583	161695871	161696855	70.3462	722
chr1	161719419	161720220	.	1000	.	-1	215.961	-1	329	5	5	161719515	161720150	59.9457	211	161719419	161720220	215.961	352
chr1	161734355	161736686	.	1000	.	-1	40.7223	-1	1887	1.25	2.44	161734611	161736514	16.0706	105	161734355	161736686	40.7223	1897
chr1	162039016	162040537	.	1000	.	-1	53.1453	-1	701	1.78	2.97	162039506	162040059	19.1467	154	162039016	162040537	53.1453	759
chr1	162467347	162468232	.	1000	.	-1	107.619	-1	431	3.89	4.98	162467609	162468042	43.9085	154	162467347	162468232	107.619	446
chr1	162530378	162532088	.	1000	.	-1	125.87	-1	640	4.15	5	162530624	162531919	42.6253	307	162530378	162532088	125.87	628
chr1	162759702	162761403	.	1000	.	-1	89.9969	-1	1022	3	4.14	162759834	162761299	27.9829	235	162759702	162761403	89.9969	1013
chr1	163290975	163292730	.	1000	.	-1	77.245	-1	915	3.09	4.23	163291191	163292332	45.2006	174	163290975	163292730	77.245	950
chr1	164095710	164096587	.	1000	.	-1	48.0842	-1	295	1.35	2.54	164095889	164096119	15.0782	103	164095710	164096587	48.0842	309
chr1	164528362	164531634	.	1000	.	-1	136.78	-1	773	4.04	5	164528405	164531566	37.5834	435	164528362	164531634	136.78	770
chr1	164531718	164535223	.	924	.	-1	37.1599	-1	484	1.04	2.23	164531879	164533747	14.1034	222	164531718	164535223	37.1599	423
chr1	164556961	164561916	.	1000	.	-1	70.3511	-1	1750	1.4	2.59	164557788	164560965	15.0782	1045	164556961	164561916	70.3511	2430
chr1	164566050	164573906	.	1000	.	-1	100.195	-1	1521	2.92	4.07	164566963	164572438	25.6955	376	164566050	164573906	100.195	1509
chr1	164580035	164583299	.	1000	.	-1	70.3511	-1	1629	2.23	3.41	164580774	164582121	21.2741	226	164580035	164583299	70.3511	1602
chr1	164715473	164719364	.	1000	.	-1	70.3511	-1	2341	1.81	2.99	164716245	164719335	17.0799	247	164715473	164719364	70.3511	1709
chr1	164740141	164742399	.	1000	.	-1	59.6323	-1	1724	1.91	3.1	164740541	164742030	19.1467	360	164740141	164742399	59.6323	1715
chr1	165130226	165133140	.	1000	.	-1	73.0915	-1	1411	1.78	2.97	165130989	165132730	17.0799	192	165130226	165133140	73.0915	1424
chr1	165599423	165601651	.	1000	.	-1	73.0915	-1	790	2.13	3.31	165599631	165600433	19.7002	576	165599423	165601651	73.0915	796
chr1	165667101	165668228	.	1000	.	-1	94.3389	-1	559	2.89	4.04	165667214	165667812	25.6955	465	165667101	165668228	94.3389	540
chr1	165737548	165739154	.	1000	.	-1	115.151	-1	865	3.1	4.24	165737672	165738907	26.8331	215	165737548	165739154	115.151	849
chr1	165796408	165798922	.	1000	.	-1	124.327	-1	867	4.08	5	165796769	165798680	41.3509	737	165796408	165798922	124.327	637
chr1	166807892	166810321	.	1000	.	-1	203.038	-1	530	5	5	166808056	166809891	70.0749	355	166807892	166810321	203.038	541
chr1	166844563	166846109	.	1000	.	-1	416.64	-1	776	5	5	166844836	166845593	115.558	525	166844563	166846109	416.64	754
chr1	167188555	167191958	.	1000	.	-1	170.095	-1	1089	5	5	167188944	167191495	102.603	491	167188555	167191958	170.095	1077
chr1	167522397	167523134	.	1000	.	-1	62.2742	-1	439	2.46	3.62	167522506	167523015	35.1201	357	167522397	167523134	62.2742	412
chr1	167683341	167684024	.	1000	.	-1	91.4393	-1	457	3.61	4.72	167683466	167683969	50.4529	326	167683341	167684024	91.4393	463
chr1	167690568	167691970	.	938	.	-1	51.8651	-1	888	1.07	2.26	167690725	167691775	13.1468	163	167690568	167691970	51.8651	1039
chr1	167904768	167907270	.	1000	.	-1	222.859	-1	873	5	5	167904829	167906818	77.0047	272	167904768	167907270	222.859	865
chr1	168025424	168025833	.	1000	.	-1	44.5774	-1	188	1.57	2.77	168025446	168025723	22.248	152	168025424	168025833	44.5774	203
chr1	168147625	168149089	.	1000	.	-1	132.082	-1	727	4.43	5	168147724	168148859	47.8102	142	168147625	168149089	132.082	752
chr1	168194650	168195923	.	1000	.	-1	66.2849	-1	359	2.51	3.67	168194711	168195677	27.9829	208	168194650	168195923	66.2849	392
chr1	168874599	168877821	.	1000	.	-1	149.14	-1	1803	4.01	5	168875531	168877365	35.9282	229	168874599	168877821	149.14	1342
chr1	169074658	169079304	.	1000	.	-1	303.033	-1	1057	5	5	169074697	169078207	92.7801	792	169074658	169079304	303.033	1092
chr1	169336595	169338267	.	1000	.	-1	162.927	-1	713	5	5	169337106	169338176	60.3385	200	169336595	169338267	162.927	716
chr1	169452778	169456425	.	1000	.	-1	357.793	-1	2103	5	5	169454191	169455822	98.5947	446	169452778	169456425	357.793	2087
chr1	169496778	169499524	.	1000	.	-1	128.683	-1	1526	4.25	5	169497823	169499148	44.1879	342	169496778	169499524	128.683	1450
chr1	169747860	169751885	.	1000	.	-1	197.611	-1	2290	5	5	169747860	169751797	108.329	887	169747873	169751885	197.611	2249
chr1	169763236	169764947	.	1000	.	-1	326.825	-1	727	5	5	169763343	169764862	145.378	621	169763236	169764947	326.825	727
chr1	169859287	169864065	.	1000	.	-1	464.715	-1	3653	5	5	169859976	169864014	197.205	980	169859287	169864065	464.715	3317
chr1	170500364	170502220	.	1000	.	-1	250.836	-1	723	5	5	170500649	170501956	81.1447	456	170500364	170502220	250.836	706
chr1	171341971	171343237	.	1000	.	-1	135.118	-1	980	3.83	4.93	171342077	171343181	34.8445	940	171341971	171343237	135.118	914
chr1	171453968	171455850	.	1000	.	-1	350.675	-1	898	5	5	171454070	171455804	98.4282	248	171453968	171455850	350.675	913
chr1	171710311	171712199	.	1000	.	-1	203.038	-1	1088	5	5	171710782	171711999	60.3385	615	171710311	171712199	203.038	1091
chr1	171749554	171751703	.	1000	.	-1	154.117	-1	1024	3.85	4.94	171749903	171751448	33.7032	269	171749554	171751703	154.117	608
chr1	172024856	172025596	.	862	.	-1	33.4865	-1	391	0.9	2.08	172024914	172025415	18.3694	276	172024856	172025596	33.4865	448
chr1	172412679	172413373	.	1000	.	-1	177.176	-1	369	5	5	172412794	172413277	91.6823	252	172412679	172413373	177.176	371
chr1	172501013	172503314	.	1000	.	-1	346.286	-1	1405	5	5	172501283	172503239	136.455	387	172501013	172503314	346.286	1401
chr1	173445601	173446279	.	1000	.	-1	192.894	-1	394	5	5	173445795	173446240	70.2737	193	173445601	173446279	192.894	401
chr1	173446372	173447919	.	1000	.	-1	382.969	-1	360	5	5	173446433	173447316	102.671	318	173446372	173447919	382.969	341
chr1	173683490	173685203	.	1000	.	-1	184.921	-1	807	3.64	4.74	173683812	173684689	31.1936	454	173683490	173685203	184.921	838
chr1	173792687	173795060	.	1000	.	-1	227.529	-1	706	5	5	173792694	173795060	89.923	715	173792687	173795029	227.529	690
chr1	173835582	173838872	.	1000	.	-1	416.843	-1	2054	5	5	173835948	173838428	232.681	685	173835582	173838872	416.843	2064
chr1	173989860	173992238	.	1000	.	-1	320.181	-1	1452	5	5	173990595	173992054	156.548	727	173989860	173992238	320.181	1442
chr1	174127840	174129542	.	1000	.	-1	140.894	-1	1010	4.76	5	174128041	174129379	53.5801	832	174127840	174129542	140.894	988
chr1	174207412	174209694	.	1000	.	-1	154.191	-1	970	4.56	5	174207937	174209062	44.2533	610	174207412	174209694	154.191	806
chr1	174967704	174970216	.	1000	.	-1	497.883	-1	941	5	5	174967719	174969806	211.747	926	174967704	174970216	497.883	941
chr1	174991914	174993310	.	1000	.	-1	126.532	-1	489	4.27	5	174992158	174993156	45.4908	200	174991914	174993310	126.532	494
chr1	175160863	175162857	.	1000	.	-1	81.7748	-1	1322	2.54	3.71	175161405	175162497	23.1835	778	175160863	175162857	81.7748	1325
chr1	176175257	176177669	.	1000	.	-1	331.879	-1	891	5	5	176175407	176177492	111.196	754	176175257	176177669	331.879	878
chr1	177553218	177554753	.	1000	.	-1	121.726	-1	1118	3.84	4.94	177553982	177554687	36.4924	340	177553218	177554753	121.726	1133
chr1	178062394	178063957	.	1000	.	-1	128.324	-1	670	4.22	5	178062826	178063637	43.5885	240	178062394	178063957	128.324	668
chr1	178511038	178513089	.	1000	.	-1	169.989	-1	1023	5	5	178511354	178512955	66.9404	708	178511038	178513089	169.989	1022
chr1	178623607	178627538	.	1000	.	-1	109.117	-1	1891	2.97	4.11	178624344	178627328	25.6955	235	178623607	178627538	109.117	2011
chr1	178693775	178696194	.	1000	.	-1	284.857	-1	957	5	5	178693859	178695461	93.3954	749	178693775	178696194	284.857	1081
chr1	178994372	178996247	.	1000	.	-1	453.136	-1	1188	5	5	178994451	178996066	143.095	1103	178994372	178996247	453.136	1194
chr1	179050275	179052356	.	1000	.	-1	266.705	-1	1122	5	5	179050500	179052113	99.9679	893	179050275	179052356	266.705	1126
chr1	179103443	179103943	.	1000	.	-1	59.6056	-1	206	2.08	3.27	179103473	179103789	21.8247	175	179103443	179103943	59.6056	208
chr1	179198026	179199376	.	1000	.	-1	169.055	-1	604	5	5	179198026	179199254	97.3158	620	179198035	179199376	169.055	580
chr1	179334265	179335666	.	1000	.	-1	224.613	-1	679	5	5	179334458	179335495	98.7829	497	179334265	179335666	224.613	668
chr1	179560336	179561759	.	1000	.	-1	167.57	-1	796	3.24	4.37	179560632	179561628	27.6042	581	179560336	179561759	167.57	715
chr1	179850346	179852947	.	1000	.	-1	426.476	-1	1154	5	5	179850667	179852622	185.46	839	179850346	179852947	426.476	1149
chr1	179922833	179924798	.	1000	.	-1	397.497	-1	1287	5	5	179923136	179924798	174.108	976	179922833	179924726	397.497	1295
chr1	180123069	180124870	.	1000	.	-1	203.614	-1	669	5	5	180123158	180124846	131.248	585	180123069	180124870	203.614	664
chr1	180135679	180138165	.	1000	.	-1	66.2688	-1	1921	2.15	3.33	180136632	180137931	20.9794	197	180135679	180138165	66.2688	1935
chr1	180470153	180472818	.	1000	.	-1	412.446	-1	1625	5	5	180470980	180472495	186.384	903	180470153	180472818	412.446	1521
chr1	180601088	180602008	.	1000	.	-1	114.149	-1	352	4.21	5	180601173	180601741	51.9659	248	180601088	180602008	114.149	372
chr1	180922412	180923763	.	1000	.	-1	164.545	-1	845	5	5	180922445	180923639	60.9918	825	180922412	180923763	164.545	833
chr1	180990861	180992887	.	1000	.	-1	306.064	-1	979	5	5	180990921	180992742	91.7718	346	180990861	180992887	306.064	970
chr1	181057134	181060431	.	1000	.	-1	380.097	-1	1173	5	5	181057415	181059800	124.525	258	181057134	181060431	380.097	1253
chr1	181073092	181074554	.	1000	.	-1	399.831	-1	1075	5	5	181073557	181074518	141.33	598	181073092	181074554	399.831	1088
chr1	181074655	181075660	.	1000	.	-1	69.1689	-1	236	1.81	3	181074752	181075051	17.1971	162	181074655	181075660	69.1689	214
chr1	181080848	181083077	.	1000	.	-1	99.371	-1	623	2.88	4.03	181080855	181083022	25.266	417	181080848	181083077	99.371	567
chr1	181085204	181090485	.	1000	.	-1	265.983	-1	1810	5	5	181085204	181090038	95.4414	260	181085216	181090485	265.983	2201
chr1	181095029	181097523	.	1000	.	-1	78.2004	-1	1120	2.94	4.08	181095308	181097139	32.1689	517	181095029	181097523	78.2004	1083
chr1	181102684	181105451	.	1000	.	-1	240.234	-1	1485	5	5	181102828	181105451	75.3015	232	181102684	181105381	240.234	1465
chr1	181998190	181999543	.	1000	.	-1	135.21	-1	858	3.93	5	181998331	181999425	36.3468	202	181998190	181999543	135.21	841
chr1	182149634	182151694	.	1000	.	-1	60.95	-1	1242	1.83	3.02	182149713	182151041	18.1055	183	182149634	182151694	60.95	1262
chr1	182359428	182361756	.	1000	.	-1	269.969	-1	1331	5	5	182359907	182361572	61.3309	884	182359428	182361756	269.969	1299
chr1	182557804	182558545	.	1000	.	-1	131.201	-1	453	4.1	5	182557841	182558494	39.7719	429	182557804	182558545	131.201	441
chr1	182569356	182574044	.	1000	.	-1	153.257	-1	3902	4.42	5	182570841	182574044	41.7056	474	182569356	182574006	153.257	3951
chr1	182601689	182604246	.	1000	.	-1	65.447	-1	1905	2.56	3.72	182602289	182604076	31.6039	333	182601689	182604246	65.447	1898
chr1	182807980	182810122	.	1000	.	-1	394.284	-1	652	5	5	182808096	182809651	159.201	126	182807980	182810122	394.284	670
chr1	182991733	182993276	.	1000	.	-1	42.1228	-1	928	1.25	2.45	182992386	182993239	31.6153	322	182991733	182993276	42.1228	882
chr1	183439466	183442503	.	1000	.	-1	437.055	-1	1858	5	5	183439558	183442327	257.946	800	183439466	183442503	437.055	1863
chr1	183603936	183605070	.	1000	.	-1	177.176	-1	616	5	5	183604157	183604908	61.3392	256	183603936	183605070	177.176	755
chr1	183627004	183627738	.	1000	.	-1	94.4073	-1	442	3.31	4.44	183627183	183627664	33.413	186	183627004	183627738	94.4073	520
chr1	184020301	184021583	.	1000	.	-1	182.547	-1	726	5	5	184020774	184021475	83.9207	271	184020301	184021583	182.547	709
chr1	184124112	184127055	.	1000	.	-1	61.7631	-1	1656	2.35	3.51	184124292	184126859	27.1396	658	184124112	184127055	61.7631	1386
chr1	184355213	184357772	.	1000	.	-1	202.012	-1	865	5	5	184355213	184357366	61.6225	498	184355226	184357772	202.012	1199
chr1	184386784	184389822	.	1000	.	-1	65.1653	-1	673	1.36	2.55	184387029	184389158	14.7897	292	184386784	184389822	65.1653	679
chr1	184394217	184395249	.	1000	.	-1	47.6495	-1	519	1.69	2.88	184394381	184394926	21.9525	403	184394217	184395249	47.6495	472
chr1	184723006	184724763	.	1000	.	-1	256.657	-1	854	5	5	184723192	184724595	77.5173	428	184723006	184724763	256.657	845
chr1	185014473	185015513	.	1000	.	-1	59.6726	-1	451	2.09	3.27	185014474	185015223	21.6403	353	185014473	185015513	59.6726	548
chr1	185125306	185127094	.	1000	.	-1	316.806	-1	601	5	5	185125306	185126858	109.824	626	185125316	185127094	316.806	567
chr1	185285111	185287582	.	1000	.	-1	287.667	-1	789	5	5	185285400	185287551	59.3568	421	185285111	185287582	287.667	868
chr1	186118562	186125458	.	1000	.	-1	269.301	-1	3608	5	5	186119296	186124940	106.432	312	186118562	186125458	269.301	2951
chr1	186343394	186345965	.	1000	.	-1	260.355	-1	1328	5	5	186343706	186345411	88.9157	1002	186343394	186345965	260.355	1343
chr1	188458595	188461318	.	1000	.	-1	68.0615	-1	566	2.55	3.71	188458793	188459900	27.4646	316	188458595	188461318	68.0615	619
chr1	188559578	188564402	.	1000	.	-1	57.3502	-1	1396	2.14	3.32	188559725	188563984	42.6107	614	188559578	188564402	57.3502	480
chr1	188674283	188677613	.	996	.	-1	50.24	-1	1682	1.2	2.4	188674283	188677498	14.09	251	188674515	188677613	50.24	1002
chr1	188680221	188685107	.	1000	.	-1	89.7036	-1	2885	2.94	4.08	188680221	188684296	27.3561	722	188680506	188685107	89.7036	2659
chr1	188737317	188740279	.	1000	.	-1	190.496	-1	1516	5	5	188737370	188740021	58.4759	826	188737317	188740279	190.496	1526
chr1	191670215	191672632	.	866	.	-1	34.0352	-1	951	0.9	2.09	191670215	191672489	20.7312	237	191670408	191672632	34.0352	770
chr1	193027176	193030066	.	1000	.	-1	241.317	-1	1736	5	5	193027694	193029843	77.9522	633	193027176	193030066	241.317	1738
chr1	193073244	193075642	.	1000	.	-1	234.517	-1	1126	5	5	193073633	193075233	85.5629	744	193073244	193075642	234.517	1119
chr1	193090490	193092626	.	1000	.	-1	263.143	-1	878	5	5	193090586	193092021	115.365	726	193090490	193092626	263.143	934
chr1	197115008	197116653	.	1000	.	-1	191.843	-1	586	5	5	197115156	197116448	79.3345	308	197115008	197116653	191.843	610
chr1	197169507	197171559	.	1000	.	-1	304.639	-1	753	5	5	197169806	197170960	96.2744	295	197169507	197171559	304.639	763
chr1	197743545	197745191	.	1000	.	-1	143.82	-1	803	4.83	5	197743784	197744904	54.453	502	197743545	197745191	143.82	865
chr1	197871043	197872429	.	1000	.	-1	388.553	-1	805	5	5	197871220	197872336	192.608	655	197871043	197872429	388.553	778
chr1	198125448	198127262	.	1000	.	-1	375.354	-1	1003	5	5	198125475	198127248	159.212	937	198125448	198127262	375.354	1042
chr1	198127420	198128948	.	1000	.	-1	92.6612	-1	1074	2.91	4.05	198127825	198128689	26.3563	650	198127420	198128948	92.6612	1094
chr1	198903875	198906660	.	1000	.	-1	71.5175	-1	2486	2.79	3.95	198904244	198906566	33.7103	835	198903875	198906660	71.5175	2465
chr1	200378500	200379669	.	1000	.	-1	133.83	-1	476	4.75	5	200378774	200379631	58.4051	188	200378500	200379669	133.83	491
chr1	200589178	200590848	.	1000	.	-1	162.234	-1	530	5	5	200589382	200589932	69.8221	323	200589178	200590848	162.234	534
chr1	200637776	200639981	.	1000	.	-1	477.937	-1	1120	5	5	200638026	200639679	338.108	899	200637776	200639981	477.937	1091
chr1	200707417	200709443	.	1000	.	-1	506.955	-1	944	5	5	200707525	200709178	159.318	255	200707417	200709443	506.955	901
chr1	200860078	200860765	.	1000	.	-1	75.7214	-1	448	2.91	4.05	200860199	200860667	33.2871	323	200860078	200860765	75.7214	453
chr1	201083099	201084241	.	1000	.	-1	214.642	-1	508	5	5	201083428	201084146	71.1064	182	201083099	201084241	214.642	506
chr1	201122643	201124392	.	1000	.	-1	266.773	-1	813	5	5	201122766	201124322	132.634	695	201122643	201124392	266.773	809
chr1	201139997	201140887	.	1000	.	-1	108.045	-1	276	2.33	3.49	201140119	201140797	20.4923	168	201139997	201140887	108.045	263
chr1	201276114	201279282	.	1000	.	-1	118.469	-1	1860	4.39	5	201276170	201279232	57.2118	718	201276114	201279282	118.469	1374
chr1	201348802	201351203	.	1000	.	-1	112.406	-1	1499	3.89	4.98	201349036	201351203	41.0991	439	201348802	201351187	112.406	1124
chr1	201367818	201369192	.	1000	.	-1	127.304	-1	659	4.65	5	201367818	201369177	61.8147	825	201367832	201369192	127.304	480
chr1	201428688	201432361	.	1000	.	-1	198.309	-1	2007	5	5	201428897	201431761	51.6563	695	201428688	201432361	198.309	2042
chr1	201436800	201438903	.	1000	.	-1	485.168	-1	1286	5	5	201436878	201438843	221.812	1216	201436800	201438903	485.168	1279
chr1	201449045	201450831	.	1000	.	-1	49.8367	-1	785	1.82	3	201449260	201450593	28.5998	175	201449045	201450831	49.8367	420
chr1	201474013	201477227	.	1000	.	-1	252.968	-1	2105	5	5	201474689	201476954	122.483	458	201474013	201477227	252.968	2112
chr1	201480397	201482282	.	1000	.	-1	142.046	-1	1175	4.97	5	201480397	201482193	60.5172	910	201480413	201482282	142.046	1424
chr1	201566172	201567766	.	1000	.	-1	61.3225	-1	573	2.18	3.36	201566475	201567001	22.499	304	201566172	201567766	61.3225	540
chr1	201618864	201620089	.	1000	.	-1	86.1013	-1	626	3.1	4.24	201618875	201619693	31.6039	600	201618864	201620089	86.1013	641
chr1	201707771	201712117	.	1000	.	-1	478.054	-1	1545	5	5	201707965	201711661	188.255	800	201707771	201712117	478.054	1535
chr1	201798204	201798858	.	1000	.	-1	151.069	-1	283	4.98	5	201798262	201798858	55.8326	239	201798204	201798828	151.069	269
chr1	201923672	201925343	.	1000	.	-1	141.511	-1	518	3.91	5	201923853	201925079	35.1201	247	201923672	201925343	141.511	522
chr1	201951738	201952851	.	1000	.	-1	159.128	-1	466	4.48	5	201951781	201952778	41.9628	432	201951738	201952851	159.128	457
chr1	201976083	201985361	.	1000	.	-1	140.094	-1	3994	3.99	5	201976721	201982492	36.3468	225	201976083	201985361	140.094	4008
chr1	201986149	201993824	.	1000	.	-1	409.572	-1	1320	5	5	201986322	201993080	128.582	597	201986149	201993824	409.572	1309
chr1	202002864	202006439	.	1000	.	-1	218.124	-1	848	5	5	202003003	202005269	116.07	726	202002864	202006439	218.124	832
chr1	202013070	202018458	.	1000	.	-1	317.591	-1	2912	5	5	202014404	202017282	112.828	1573	202013070	202018458	317.591	2918
chr1	202024436	202029814	.	1000	.	-1	316.79	-1	1493	5	5	202024628	202028790	154.813	1335	202024436	202029814	316.79	1460
chr1	202049609	202058247	.	1000	.	-1	388.399	-1	5068	5	5	202050242	202057578	127.277	501	202049609	202058247	388.399	5090
chr1	202073660	202079413	.	1000	.	-1	225.98	-1	2478	5	5	202074185	202078959	59.5085	2130	202073660	202079413	225.98	2301
chr1	202080859	202084181	.	1000	.	-1	67.8305	-1	1222	2.55	3.71	202080962	202083573	27.5976	810	202080859	202084181	67.8305	824
chr1	202099871	202103202	.	1000	.	-1	102.785	-1	2188	3.17	4.31	202100888	202102742	28.976	1179	202099871	202103202	102.785	2180
chr1	202112356	202114343	.	1000	.	-1	150.441	-1	1144	5	5	202112873	202114297	61.9252	854	202112356	202114343	150.441	918
chr1	202309967	202311989	.	1000	.	-1	266.002	-1	939	5	5	202310218	202311989	107.412	199	202309967	202311983	266.002	934
chr1	202317667	202318706	.	1000	.	-1	198.18	-1	319	5	5	202317811	202318527	81.0234	177	202317667	202318706	198.18	318
chr1	202775427	202777778	.	1000	.	-1	356.118	-1	1067	5	5	202775826	202777656	121.808	726	202775427	202777778	356.118	1010
chr1	202779336	202782305	.	1000	.	-1	211.001	-1	897	5	5	202779579	202782209	72.864	244	202779336	202782305	211.001	902
chr1	202804094	202806562	.	1000	.	-1	45.7853	-1	1498	1.54	2.74	202804781	202806297	31.5235	148	202804094	202806562	45.7853	1482
chr1	202829084	202831292	.	1000	.	-1	314.782	-1	1255	5	5	202829624	202830700	80.4408	666	202829084	202831292	314.782	1305
chr1	202856588	202858774	.	1000	.	-1	405.045	-1	1521	5	5	202857166	202858351	188.52	960	202856588	202858774	405.045	1505
chr1	202895135	202897063	.	1000	.	-1	316.939	-1	1093	5	5	202895487	202896886	111.903	739	202895135	202897063	316.939	1096
chr1	202926646	202928128	.	1000	.	-1	328.315	-1	617	5	5	202926835	202928046	95.1384	276	202926646	202928128	328.315	635
chr1	202975384	202977695	.	1000	.	-1	369.708	-1	1317	5	5	202975412	202977293	91.8281	1284	202975384	202977695	369.708	1323
chr1	202995019	202996192	.	1000	.	-1	78.1112	-1	561	2.77	3.93	202995132	202996138	27.3573	208	202995019	202996192	78.1112	778
chr1	203273956	203275911	.	1000	.	-1	300.184	-1	896	5	5	203274080	203275751	93.2465	238	203273956	203275911	300.184	921
chr1	203284363	203285830	.	1000	.	-1	91.124	-1	1175	2.96	4.1	203285112	203285807	27.2048	440	203284363	203285830	91.124	1161
chr1	203286070	203286865	.	894	.	-1	44.1161	-1	291	0.96	2.15	203286110	203286521	12.5004	245	203286070	203286865	44.1161	298
chr1	203295385	203297704	.	1000	.	-1	480.778	-1	1548	5	5	203295922	203297499	219.323	1030	203295385	203297704	480.778	1529
chr1	203456364	203457432	.	1000	.	-1	53.7106	-1	451	2.03	3.22	203456671	203457360	28.8208	141	203456364	203457432	53.7106	419
chr1	203595435	203596632	.	1000	.	-1	106.526	-1	213	3.18	4.32	203595491	203596411	28.206	164	203595435	203596632	106.526	218
chr1	203764284	203765919	.	1000	.	-1	398.39	-1	720	5	5	203764447	203765826	200.931	560	203764284	203765919	398.39	718
chr1	203829957	203831906	.	1000	.	-1	360.572	-1	965	5	5	203830153	203831370	146.336	237	203829957	203831906	360.572	1003
chr1	204042106	204044333	.	1000	.	-1	261.61	-1	326	5	5	204042223	204044333	121.309	211	204042106	204044264	261.61	324
chr1	204048703	204050397	.	977	.	-1	46.7492	-1	687	1.16	2.35	204049281	204050293	13.8799	109	204048703	204050397	46.7492	695
chr1	204072381	204074467	.	1000	.	-1	66.0157	-1	1092	2.54	3.7	204072786	204074354	30.0986	266	204072381	204074467	66.0157	785
chr1	204098002	204101921	.	1000	.	-1	108.399	-1	2287	2.65	3.81	204098357	204101529	22.671	702	204098002	204101921	108.399	2033
chr1	204182498	204184027	.	1000	.	-1	86.4218	-1	520	3.16	4.3	204182635	204183825	33.5216	251	204182498	204184027	86.4218	536
chr1	204254632	204257930	.	1000	.	-1	260.181	-1	1577	5	5	204254793	204257499	95.2865	1415	204254632	204257930	260.181	1579
chr1	204283049	204283784	.	1000	.	-1	44.8948	-1	528	1.58	2.78	204283351	204283707	21.6999	228	204283049	204283784	44.8948	526
chr1	204332095	204333400	.	1000	.	-1	128.146	-1	496	4.8	5	204332255	204333242	74.7959	334	204332095	204333400	128.146	498
chr1	204377681	204382562	.	1000	.	-1	445.822	-1	3049	5	5	204378588	204382068	179.764	655	204377681	204382562	445.822	3011
chr1	204384693	204389997	.	1000	.	-1	344.71	-1	1943	5	5	204385440	204388435	170.73	1214	204384693	204389997	344.71	1926
chr1	204411514	204413315	.	877	.	-1	48.6377	-1	659	0.92	2.11	204411858	204412983	12.2205	246	204411514	204413315	48.6377	617
chr1	204447965	204450172	.	885	.	-1	33.7053	-1	1342	0.94	2.13	204448194	204450001	14.7024	390	204447965	204450172	33.7053	1294
chr1	204462251	204464463	.	1000	.	-1	345.085	-1	1343	5	5	204462713	204464138	158.648	918	204462251	204464463	345.085	1307
chr1	204475799	204477622	.	1000	.	-1	147.759	-1	695	1.22	2.43	204476330	204477255	16.9912	237	204475799	204477622	147.759	728
chr1	204484711	204486718	.	1000	.	-1	444.429	-1	950	5	5	204484926	204486549	227.674	718	204484711	204486718	444.429	968
chr1	205090220	205092091	.	1000	.	-1	436.698	-1	1056	5	5	205090625	205091981	181.587	656	205090220	205092091	436.698	1052
chr1	205179806	205181026	.	1000	.	-1	313.168	-1	908	5	5	205179979	205180900	147.748	733	205179806	205181026	313.168	911
chr1	205290174	205291223	.	1000	.	-1	95.5437	-1	503	3.65	4.75	205290301	205290924	44.9181	397	205290174	205291223	95.5437	483
chr1	205416665	205419922	.	1000	.	-1	129.444	-1	2267	3.12	4.26	205416796	205419656	26.4664	347	205416665	205419922	129.444	2289
chr1	205446066	205448529	.	1000	.	-1	261.319	-1	763	5	5	205446317	205448206	66.0534	437	205446066	205448529	261.319	839
chr1	205473211	205475144	.	1000	.	-1	226.245	-1	748	5	5	205473244	205474646	75.4127	176	205473211	205475144	226.245	766
chr1	205511992	205513744	.	1000	.	-1	88.6362	-1	1005	3.26	4.39	205512185	205513744	34.9318	433	205511992	205513560	88.6362	1024
chr1	205599276	205601849	.	1000	.	-1	336.641	-1	1534	5	5	205599947	205601839	214.717	853	205599276	205601849	336.641	1545
chr1	205717049	205720242	.	1000	.	-1	523.929	-1	1996	5	5	205717477	205720104	266.006	1505	205717049	205720242	523.929	2060
chr1	205781635	205783164	.	1000	.	-1	170.513	-1	544	5	5	205781767	205783104	62.9101	437	205781635	205783164	170.513	520
chr1	206135383	206138066	.	1000	.	-1	154.144	-1	2266	5	5	206135535	206137847	98.1069	2094	206135383	206138066	154.144	2286
chr1	206138393	206139763	.	1000	.	-1	128.443	-1	263	4.82	5	206138443	206139607	82.5519	223	206138393	206139763	128.443	254
chr1	206620935	206623257	.	1000	.	-1	44.8233	-1	1445	1.55	2.74	206620935	206623006	27.3607	463	206620991	206623257	44.8233	1381
chr1	206785031	206786397	.	1000	.	-1	194.825	-1	611	5	5	206785228	206786397	69.1526	280	206785031	206786336	194.825	606
chr1	206858154	206859949	.	1000	.	-1	143.598	-1	783	5	5	206858232	206859895	74.0593	219	206858154	206859949	143.598	1269
chr1	207068086	207070766	.	1000	.	-1	88.4797	-1	1006	2.66	3.82	207068123	207070380	23.6308	229	207068086	207070766	88.4797	963
chr1	207082032	207083774	.	1000	.	-1	94.878	-1	957	3.74	4.84	207082181	207083689	66.358	654	207082032	207083774	94.878	1111
chr1	207225700	207227115	.	1000	.	-1	59.8323	-1	1062	2.24	3.41	207225806	207226941	24.9887	939	207225700	207227115	59.8323	1079
chr1	207488144	207493358	.	1000	.	-1	253.711	-1	2325	5	5	207488674	207492489	90.1744	664	207488144	207493358	253.711	2349
chr1	207493769	207496126	.	1000	.	-1	394.901	-1	1444	5	5	207494117	207495914	139.282	362	207493769	207496126	394.901	1451
chr1	207923906	207926939	.	1000	.	-1	168.907	-1	1707	4.77	5	207924532	207926424	46.0245	325	207923906	207926939	168.907	1740
chr1	207995881	207998075	.	1000	.	-1	64.9417	-1	591	2.1	3.29	207996276	207997463	20.2031	217	207995881	207998075	64.9417	570
chr1	208041808	208042779	.	1000	.	-1	66.2849	-1	528	2.41	3.57	208041919	208042530	24.5704	450	208041808	208042779	66.2849	495
chr1	208136484	208137465	.	1000	.	-1	103.145	-1	340	3.63	4.73	208136574	208136984	37.5834	236	208136484	208137465	103.145	355
chr1	209957373	209958653	.	1000	.	-1	58.3212	-1	403	2.17	3.35	209957633	209958491	24.5704	139	209957373	209958653	58.3212	415
chr1	209978955	209980098	.	896	.	-1	34.8282	-1	346	0.97	2.16	209979106	209979902	14.1034	172	209978955	209980098	34.8282	341
chr1	210405584	210407904	.	1000	.	-1	250.848	-1	914	5	5	210405738	210407301	64.1222	735	210405584	210407904	250.848	939
chr1	210501751	210503127	.	1000	.	-1	164.003	-1	694	4.46	5	210501987	210502979	41.3509	451	210501751	210503127	164.003	702
chr1	210547180	210547986	.	1000	.	-1	77.245	-1	546	1.81	2.99	210547572	210547865	17.0799	179	210547180	210547986	77.245	521
chr1	211430736	211434969	.	1000	.	-1	292.116	-1	1449	5	5	211431412	211434445	115.148	808	211430736	211434969	292.116	1415
chr1	211499779	211501279	.	1000	.	-1	63.6048	-1	634	2.28	3.45	211499852	211501095	23.4705	166	211499779	211501279	63.6048	592
chr1	211555585	211557160	.	1000	.	-1	197.211	-1	725	5	5	211555756	211556880	53.1274	524	211555585	211557160	197.211	756
chr1	211589469	211590458	.	1000	.	-1	48.0842	-1	656	1.68	2.87	211589613	211590458	20.2031	522	211589469	211590406	48.0842	646
chr1	211750283	211753475	.	1000	.	-1	235.028	-1	1987	5	5	211750709	211753307	75.5486	854	211750283	211753475	235.028	1985
chr1	211848067	211849592	.	1000	.	-1	44.3649	-1	709	1.54	2.73	211848419	211848981	24.5704	397	211848067	211849592	44.3649	669
chr1	212003306	212004582	.	1000	.	-1	130.523	-1	644	4.35	5	212003639	212004177	46.5012	349	212003306	212004582	130.523	607
chr1	212207734	212209685	.	1000	.	-1	136.78	-1	1006	4.35	5	212208084	212209500	43.9085	145	212207734	212209685	136.78	1006
chr1	212319485	212322256	.	1000	.	-1	78.6407	-1	1896	1.92	3.11	212320131	212321685	18.1055	219	212319485	212322256	78.6407	1960
chr1	212456975	212460416	.	1000	.	-1	288.483	-1	2216	5	5	212457752	212460121	81.4082	573	212456975	212460416	288.483	2026
chr1	212731503	212732795	.	1000	.	-1	152.674	-1	659	4.86	5	212731632	212732391	51.7862	581	212731503	212732795	152.674	608
chr1	212964710	212966068	.	1000	.	-1	63.6002	-1	292	2.5	3.66	212964828	212965554	33.9036	184	212964710	212966068	63.6002	283
chr1	213030752	213032341	.	1000	.	-1	89.9969	-1	1040	3.37	4.49	213031015	213032331	37.5834	266	213030752	213032341	89.9969	1037
chr1	213188127	213189774	.	1000	.	-1	94.3389	-1	722	3.46	4.58	213188406	213189620	37.5834	651	213188127	213189774	94.3389	515
chr1	213224154	213225124	.	1000	.	-1	57.0169	-1	288	1.95	3.13	213224301	213224958	20.2824	143	213224154	213225124	57.0169	287
chr1	214453614	214455394	.	1000	.	-1	143.095	-1	1055	5	5	214453910	214455285	72.6543	779	214453614	214455394	143.095	1036
chr1	214724326	214725883	.	1000	.	-1	81.4483	-1	1181	3.25	4.38	214724595	214725797	45.2006	942	214724326	214725883	81.4483	1152
chr1	214776115	214777470	.	1000	.	-1	46.8377	-1	638	1.62	2.81	214776493	214777267	31.5021	247	214776115	214777470	46.8377	651
chr1	215255472	215258644	.	1000	.	-1	290.74	-1	1315	5	5	215255662	215258498	100.389	511	215255472	215258644	290.74	1292
chr1	215285874	215291331	.	1000	.	-1	218.899	-1	2269	5	5	215286612	215290077	61.4528	516	215285874	215291331	218.899	2258
chr1	215337996	215340434	.	1000	.	-1	83.9589	-1	1881	2.62	3.78	215338271	215340250	23.7023	222	215337996	215340434	83.9589	1907
chr1	215439492	215442744	.	1000	.	-1	55.7429	-1	2154	2.12	3.3	215439492	215442744	26.9762	521	215439531	215442644	55.7429	2194
chr1	215595582	215600630	.	1000	.	-1	90.318	-1	3050	1.85	3.04	215598048	215599531	17.5792	185	215595582	215600630	90.318	3420
chr1	215644519	215658353	.	1000	.	-1	410.713	-1	6088	5	5	215645240	215656996	179.062	611	215644519	215658353	410.713	6063
chr1	215658554	215666835	.	1000	.	-1	285.189	-1	4423	5	5	215659679	215666133	126.867	1402	215658554	215666835	285.189	4407
chr1	215688800	215693554	.	1000	.	-1	152.516	-1	2120	4.3	5	215689013	215693372	39.9968	591	215688800	215693554	152.516	2110
chr1	215739877	215743977	.	1000	.	-1	406.654	-1	977	5	5	215740142	215742792	160.277	444	215739877	215743977	406.654	976
chr1	217746779	217748922	.	1000	.	-1	40.868	-1	816	1.3	2.49	217747216	217748583	26.5234	202	217746779	217748922	40.868	853
chr1	217803639	217805228	.	1000	.	-1	393.802	-1	915	5	5	217803866	217804916	207.156	686	217803639	217805228	393.802	917
chr1	217869359	217870613	.	1000	.	-1	64.6697	-1	277	1.81	3	217869393	217869826	17.557	234	217869359	217870613	64.6697	287
chr1	217884931	217887742	.	1000	.	-1	83.264	-1	1298	2.72	3.88	217885050	217887472	25.023	693	217884931	217887742	83.264	1264
chr1	218125491	218128518	.	1000	.	-1	80.4952	-1	1727	2.79	3.95	218125668	218127966	26.8436	220	218125491	218128518	80.4952	1714
chr1	218457874	218459238	.	1000	.	-1	116.886	-1	528	4.42	5	218457874	218458946	63.2971	520	218457921	218459238	116.886	490
chr1	218652819	218655960	.	1000	.	-1	92.5444	-1	902	3.62	4.73	218653050	218655960	49.3783	308	218652819	218655906	92.5444	1145
chr1	219346888	219348014	.	1000	.	-1	188.909	-1	486	5	5	219346922	219347675	68.7835	458	219346888	219348014	188.909	480
chr1	219786194	219786563	.	934	.	-1	40.7223	-1	193	1.06	2.25	219786260	219786520	13.5925	130	219786194	219786563	40.7223	191
chr1	220218730	220220909	.	1000	.	-1	146.669	-1	1264	3.4	4.52	220219106	220220755	29.0528	376	220218730	220220909	146.669	1586
chr1	220267265	220268611	.	1000	.	-1	235.449	-1	380	5	5	220267416	220268527	105.535	223	220267265	220268611	235.449	386
chr1	220444901	220446386	.	1000	.	-1	148.965	-1	691	3.61	4.72	220445144	220446145	31.0794	488	220444901	220446386	148.965	651
chr1	220959996	220960855	.	1000	.	-1	66.2849	-1	438	1.57	2.77	220960043	220960685	16.0706	368	220959996	220960855	66.2849	461
chr1	221915688	221917034	.	1000	.	-1	80.4357	-1	599	3.05	4.19	221915812	221916790	33.9036	677	221915688	221917034	80.4357	397
chr1	222638460	222639545	.	1000	.	-1	71.4354	-1	737	2.51	3.68	222638965	222639390	24.5848	245	222638460	222639545	71.4354	725
chr1	222762570	222764070	.	1000	.	-1	133.644	-1	835	3.73	4.83	222762669	222763847	33.2871	740	222762570	222764070	133.644	832
chr1	222791404	222792144	.	1000	.	-1	80.0418	-1	235	3.03	4.17	222791446	222791972	33.9036	178	222791404	222792144	80.0418	250
chr1	222816933	222818452	.	1000	.	-1	249.081	-1	404	5	5	222816933	222818222	87.8248	261	222816983	222818452	249.081	346
chr1	222884811	222887382	.	1000	.	-1	467.248	-1	1215	5	5	222884970	222887203	188.788	610	222884811	222887382	467.248	1214
chr1	222987920	222989196	.	1000	.	-1	166.524	-1	618	5	5	222987997	222988895	71.8727	523	222987920	222989196	166.524	636
chr1	223307073	223308526	.	1000	.	-1	192.098	-1	308	5	5	223307202	223308021	69.1526	174	223307073	223308526	192.098	313
chr1	223315733	223317120	.	1000	.	-1	73.2516	-1	715	2.88	4.03	223316055	223317004	34.9529	234	223315733	223317120	73.2516	680
chr1	223536337	223538370	.	1000	.	-1	59.6323	-1	891	2.18	3.36	223536356	223538108	23.4705	452	223536337	223538370	59.6323	1036
chr1	223616789	223619271	.	1000	.	-1	100.63	-1	933	3.49	4.6	223616942	223619193	35.1201	798	223616789	223619271	100.63	915
chr1	223743130	223745910	.	1000	.	-1	113.636	-1	681	4	5	223743409	223745650	43.9085	353	223743130	223745910	113.636	730
chr1	223899939	223900657	.	1000	.	-1	46.6798	-1	425	1.57	2.77	223899939	223900635	18.7088	383	223900088	223900657	46.6798	319
chr1	223907619	223909819	.	1000	.	-1	102.936	-1	1481	3.25	4.38	223907768	223909765	30.078	537	223907619	223909819	102.936	1412
chr1	224032665	224034987	.	1000	.	-1	275.527	-1	1385	5	5	224032982	224034743	95.7711	358	224032665	224034987	275.527	1398
chr1	224179246	224182471	.	1000	.	-1	219.405	-1	1519	5	5	224179749	224181797	59.3242	361	224179246	224182471	219.405	1530
chr1	224301476	224302889	.	1000	.	-1	295.148	-1	497	5	5	224301753	224302526	95.4501	215	224301476	224302889	295.148	503
chr1	224370371	224371960	.	1000	.	-1	67.7451	-1	766	2.65	3.82	224370559	224371829	50.6037	576	224370371	224371960	67.7451	768
chr1	224393101	224394327	.	1000	.	-1	73.8712	-1	433	2.87	4.02	224393216	224393752	32.9878	275	224393101	224394327	73.8712	477
chr1	224488308	224489468	.	1000	.	-1	46.4864	-1	275	1.23	2.43	224488387	224489375	14.2182	238	224488308	224489468	46.4864	234
chr1	224491329	224492477	.	911	.	-1	36.4579	-1	721	1	2.2	224491618	224492368	23.8733	404	224491329	224492477	36.4579	749
chr1	224492619	224493631	.	1000	.	-1	65.7111	-1	519	2.41	3.57	224492666	224493551	25.6606	720	224492619	224493631	65.7111	272
chr1	224493752	224494740	.	1000	.	-1	46.5978	-1	294	1.56	2.75	224493798	224494456	18.3711	176	224493752	224494740	46.5978	367
chr1	224514528	224519228	.	1000	.	-1	479.521	-1	3458	5	5	224515673	224519228	217.789	430	224514528	224519206	479.521	3455
chr1	224544458	224546032	.	1000	.	-1	160.293	-1	346	5	5	224544536	224545458	69.4689	243	224544458	224546032	160.293	371
chr1	224620401	224623652	.	1000	.	-1	221.119	-1	2322	5	5	224621720	224623483	71.6229	984	224620401	224623652	221.119	2341
chr1	224641266	224643293	.	1000	.	-1	81.9009	-1	1132	1.79	2.98	224641553	224642593	17.0799	226	224641266	224643293	81.9009	1123
chr1	224668913	224671641	.	984	.	-1	43.8376	-1	1977	1.17	2.37	224669582	224671287	14.1034	201	224668913	224671641	43.8376	1970
chr1	225116857	225118127	.	1000	.	-1	286.669	-1	748	5	5	225117053	225117904	91.0661	549	225116857	225118127	286.669	752
chr1	225614982	225616302	.	1000	.	-1	44.1692	-1	595	1.43	2.62	225615198	225616268	30.3053	282	225614982	225616302	44.1692	588
chr1	225839109	225841952	.	1000	.	-1	289.245	-1	1703	5	5	225839678	225841739	92.1247	1510	225839109	225841952	289.245	1328
chr1	225964699	225967256	.	1000	.	-1	463.712	-1	1092	5	5	225964894	225966402	176.382	266	225964699	225967256	463.712	1067
chr1	225997662	225998623	.	1000	.	-1	48.0573	-1	395	1.66	2.85	225997792	225998416	32.6975	224	225997662	225998623	48.0573	437
chr1	226062085	226064345	.	1000	.	-1	178.604	-1	961	4.5	5	226062496	226063738	40.6866	564	226062085	226064345	178.604	947
chr1	226068680	226071485	.	1000	.	-1	237.047	-1	1421	5	5	226069302	226071157	74.6795	1039	226068680	226071485	237.047	1182
chr1	226110568	226112844	.	1000	.	-1	360.98	-1	1185	5	5	226111213	226112675	104.345	549	226110568	226112844	360.98	1177
chr1	226186165	226187772	.	1000	.	-1	90.1698	-1	724	3.54	4.66	226186595	226187734	46.6269	205	226186165	226187772	90.1698	755
chr1	226249037	226252096	.	1000	.	-1	503.353	-1	1598	5	5	226249124	226252052	176.531	401	226249037	226252096	503.353	1593
chr1	226270475	226271955	.	1000	.	-1	68.364	-1	992	2.55	3.72	226270693	226271753	27.4853	208	226270475	226271955	68.364	974
chr1	226297106	226299187	.	1000	.	-1	417.089	-1	1172	5	5	226297329	226298930	157.734	317	226297106	226299187	417.089	1173
chr1	226309010	226310944	.	1000	.	-1	207.544	-1	633	5	5	226309034	226310919	86.0264	584	226309010	226310944	207.544	658
chr1	226314710	226316675	.	1000	.	-1	129.63	-1	1296	4.62	5	226315335	226316308	56.966	670	226314710	226316675	129.63	1297
chr1	226320018	226321679	.	1000	.	-1	87.7256	-1	580	1.69	2.88	226320353	226321508	16.7788	254	226320018	226321679	87.7256	571
chr1	226373360	226375214	.	1000	.	-1	334.298	-1	909	5	5	226373823	226375214	115.525	456	226373360	226375181	334.298	899
chr1	226495965	226497680	.	1000	.	-1	344.433	-1	684	5	5	226496171	226497597	105.48	480	226495965	226497680	344.433	683
chr1	226594797	226596471	.	1000	.	-1	101.359	-1	692	3.53	4.64	226595090	226596309	36.0174	253	226594797	226596471	101.359	727
chr1	226890148	226891824	.	1000	.	-1	445.518	-1	938	5	5	226890397	226891675	202.749	694	226890148	226891824	445.518	934
chr1	226925812	226927087	.	1000	.	-1	57.0127	-1	833	2.01	3.2	226926112	226927011	21.7235	394	226925812	226927087	57.0127	972
chr1	227057777	227059059	.	1000	.	-1	88.5594	-1	716	3.43	4.55	227058316	227058979	42.6253	172	227057777	227059059	88.5594	722
chr1	227126122	227128771	.	1000	.	-1	365.004	-1	1391	5	5	227126624	227128467	124.127	528	227126122	227128771	365.004	1373
chr1	227175373	227176751	.	852	.	-1	33.4865	-1	415	0.87	2.05	227175401	227176042	13.3636	326	227175373	227176751	33.4865	477
chr1	227505104	227507089	.	1000	.	-1	207.387	-1	1122	5	5	227505248	227506962	73.895	766	227505104	227507089	207.387	1335
chr1	227729789	227730894	.	1000	.	-1	62.5523	-1	427	2.39	3.55	227729904	227730781	48.0237	218	227729789	227730894	62.5523	424
chr1	227750814	227752345	.	1000	.	-1	218.494	-1	546	5	5	227751145	227752251	90.111	196	227750814	227752345	218.494	565
chr1	227915339	227917213	.	1000	.	-1	106.125	-1	907	2.7	3.87	227915603	227916962	23.4582	279	227915339	227917213	106.125	1176
chr1	227921174	227924109	.	1000	.	-1	320.206	-1	1653	5	5	227921410	227923774	95.6167	373	227921174	227924109	320.206	1621
chr1	228083377	228084183	.	851	.	-1	33.9554	-1	192	0.87	2.05	228083403	228084183	13.1468	154	228083377	228084122	33.9554	204
chr1	228133047	228135674	.	1000	.	-1	47.6361	-1	2017	1.71	2.9	228133691	228135655	23.4705	740	228133047	228135674	47.6361	1649
chr1	228135766	228136296	.	1000	.	-1	45.335	-1	185	1.38	2.58	228135804	228136101	16.0706	130	228135766	228136296	45.335	203
chr1	228269116	228272269	.	1000	.	-1	451.932	-1	1486	5	5	228269330	228271610	159.714	1273	228269116	228272269	451.932	1485
chr1	228289407	228291686	.	1000	.	-1	257.174	-1	1410	5	5	228289668	228291632	97.9771	1108	228289407	228291686	257.174	1452
chr1	228296320	228297831	.	1000	.	-1	163.406	-1	523	4.95	5	228296437	228297711	50.5374	297	228296320	228297831	163.406	523
chr1	228326977	228328933	.	1000	.	-1	236.501	-1	1211	5	5	228327161	228328683	59.8844	233	228326977	228328933	236.501	1248
chr1	228352569	228354860	.	1000	.	-1	587.048	-1	1030	5	5	228352581	228354392	342.54	340	228352569	228354860	587.048	1031
chr1	228400754	228401913	.	1000	.	-1	138.353	-1	411	3.15	4.28	228400868	228401359	26.7748	319	228400754	228401913	138.353	390
chr1	228565327	228566929	.	1000	.	-1	118.03	-1	851	3.59	4.7	228565661	228566861	32.8158	720	228565327	228566929	118.03	648
chr1	228592903	228595515	.	1000	.	-1	389.949	-1	1336	5	5	228592965	228595459	104.155	843	228592903	228595515	389.949	1267
chr1	228643573	228648207	.	1000	.	-1	315.236	-1	2208	5	5	228644565	228647852	101.345	605	228643573	228648207	315.236	1831
chr1	228673836	228676392	.	1000	.	-1	457.311	-1	1051	5	5	228673871	228676158	192.181	1002	228673836	228676392	457.311	1066
chr1	228856223	228857965	.	1000	.	-1	98.9705	-1	1351	3.05	4.19	228856835	228857853	27.4886	174	228856223	228857965	98.9705	1385
chr1	228870572	228872520	.	1000	.	-1	105.428	-1	546	4.06	5	228870623	228872305	57.8601	707	228870572	228872520	105.428	335
chr1	229228055	229232201	.	1000	.	-1	117.146	-1	2056	3.29	4.41	229228055	229231946	29.0374	670	229228072	229232201	117.146	2360
chr1	229355945	229358538	.	1000	.	-1	122.602	-1	1294	4.32	5	229356509	229358145	49.3735	431	229355945	229358538	122.602	1310
chr1	229406755	229408099	.	1000	.	-1	80.0418	-1	251	3.17	4.31	229406762	229407633	43.4871	246	229406755	229408099	80.0418	249
chr1	229477312	229479151	.	1000	.	-1	204.299	-1	1311	5	5	229477744	229478990	58.6374	873	229477312	229479151	204.299	1317
chr1	229642964	229644849	.	1000	.	-1	213.184	-1	970	5	5	229643416	229644738	81.68	520	229642964	229644849	213.184	968
chr1	229693395	229695912	.	1000	.	-1	200.595	-1	1001	5	5	229693601	229695418	81.4082	763	229693395	229695912	200.595	1033
chr1	229760596	229762969	.	1000	.	-1	155.682	-1	1125	5	5	229760795	229762503	104.155	283	229760596	229762969	155.682	1129
chr1	229904240	229905054	.	852	.	-1	34.3139	-1	302	0.87	2.05	229904371	229904653	13.114	152	229904240	229905054	34.3139	321
chr1	230202118	230204256	.	1000	.	-1	97.2577	-1	996	3.63	4.73	230202225	230203957	41.3509	910	230202118	230204256	97.2577	976
chr1	230778071	230779387	.	1000	.	-1	178.193	-1	311	5	5	230778189	230778715	67.4493	174	230778071	230779387	178.193	331
chr1	230885604	230890014	.	1000	.	-1	268.648	-1	2310	5	5	230886508	230889941	69.7847	323	230885604	230890014	268.648	2359
chr1	231003220	231005339	.	1000	.	-1	196.391	-1	858	4.75	5	231003717	231005009	43.1217	362	231003220	231005339	196.391	857
chr1	231113795	231115553	.	1000	.	-1	133.252	-1	600	3.92	5	231113860	231115395	36.3468	337	231113795	231115553	133.252	609
chr1	231376182	231377754	.	1000	.	-1	162.432	-1	590	4.51	5	231376392	231377471	42.193	419	231376182	231377754	162.432	551
chr1	231472179	231474720	.	1000	.	-1	366.152	-1	1693	5	5	231472998	231474568	156.737	879	231472179	231474720	366.152	1688
chr1	231556485	231558968	.	1000	.	-1	302.894	-1	1351	5	5	231556676	231558801	134.466	1169	231556485	231558968	302.894	1342
chr1	231663664	231665706	.	1000	.	-1	348.506	-1	543	5	5	231663858	231665026	133.183	349	231663664	231665706	348.506	544
chr1	231912723	231915258	.	1000	.	-1	81.5674	-1	1569	2.83	3.98	231913256	231914794	27.3148	287	231912723	231915258	81.5674	1578
chr1	232114325	232125759	.	1000	.	-1	395.119	-1	9488	5	5	232116309	232125189	100.746	3536	232114325	232125759	395.119	9426
chr1	232284323	232286848	.	968	.	-1	51.1065	-1	2125	1.13	2.33	232284472	232286756	13.3931	184	232284323	232286848	51.1065	2091
chr1	232513601	232515700	.	1000	.	-1	103.847	-1	878	3.47	4.59	232513732	232515196	33.9036	440	232513601	232515700	103.847	872
chr1	232763651	232766855	.	1000	.	-1	223.167	-1	2555	5	5	232764919	232766855	77.2939	1270	232763651	232766782	223.167	2572
chr1	232940539	232942022	.	1000	.	-1	242.785	-1	832	5	5	232940649	232941945	85.8975	762	232940539	232942022	242.785	793
chr1	233004110	233005956	.	1000	.	-1	87.1269	-1	1231	3.47	4.59	233004153	233005956	51.9659	268	233004110	233005890	87.1269	1231
chr1	233085750	233087069	.	1000	.	-1	119.962	-1	757	4.56	5	233085750	233087050	71.7647	762	233085793	233087069	119.962	710
chr1	233463322	233464617	.	1000	.	-1	122.787	-1	397	4	5	233463422	233464371	39.8535	299	233463322	233464617	122.787	395
chr1	233748846	233751725	.	1000	.	-1	278.051	-1	1218	5	5	233749193	233751385	107.273	858	233748846	233751725	278.051	1232
chr1	233841125	233844735	.	1000	.	-1	124.206	-1	1904	3.49	4.61	233842505	233844193	30.7905	437	233841125	233844735	124.206	1895
chr1	233870374	233872676	.	1000	.	-1	104.675	-1	1082	2.66	3.82	233870748	233871640	22.8592	762	233870374	233872676	104.675	1028
chr1	234508328	234510057	.	1000	.	-1	479.067	-1	996	5	5	234508715	234509842	162.53	628	234508328	234510057	479.067	978
chr1	234613474	234615196	.	1000	.	-1	315.588	-1	1277	5	5	234613635	234615134	124.282	1118	234613474	234615196	315.588	1275
chr1	234657246	234659509	.	1000	.	-1	77.4698	-1	1885	2.89	4.04	234658520	234659362	30.8105	624	234657246	234659509	77.4698	1872
chr1	234679291	234681395	.	1000	.	-1	58.1513	-1	759	1.85	3.04	234679851	234680359	18.7088	182	234679291	234681395	58.1513	776
chr1	234734048	234750931	.	1000	.	-1	604.726	-1	10701	5	5	234734590	234749404	234.716	1097	234734048	234750931	604.726	10372
chr1	234857570	234863748	.	1000	.	-1	380.889	-1	3110	5	5	234858211	234862452	120.844	950	234857570	234863748	380.889	3296
chr1	235010129	235013588	.	1000	.	-1	216.557	-1	1801	5	5	235010456	235013193	61.8777	517	235010129	235013588	216.557	1806
chr1	235091768	235102012	.	1000	.	-1	304.623	-1	7609	5	5	235092498	235101324	90.2985	3634	235091768	235102012	304.623	7695
chr1	235109947	235110900	.	1000	.	-1	50.0462	-1	701	1.54	2.74	235110003	235110824	17.0112	679	235109947	235110900	50.0462	668
chr1	235111024	235112773	.	1000	.	-1	63.5899	-1	496	2.11	3.3	235111279	235112083	20.9794	222	235111024	235112773	63.5899	516
chr1	235120885	235124579	.	1000	.	-1	110.871	-1	2869	2.81	3.97	235122540	235124098	24.0807	1214	235120885	235124579	110.871	2870
chr1	235132218	235135252	.	1000	.	-1	147.846	-1	1323	4.34	5	235132603	235134538	41.3509	947	235132218	235135252	147.846	1314
chr1	235242137	235244755	.	951	.	-1	72.0812	-1	1089	1.1	2.29	235242268	235244469	13.974	528	235242137	235244755	72.0812	1063
chr1	235244986	235247948	.	1000	.	-1	147.465	-1	1927	5	5	235245248	235247634	66.9404	1657	235244986	235247948	147.465	1936
chr1	235291173	235293005	.	1000	.	-1	348.333	-1	772	5	5	235291186	235292710	94.1961	761	235291173	235293005	348.333	770
chr1	235323779	235325256	.	1000	.	-1	180.666	-1	622	5	5	235323973	235324997	66.3286	416	235323779	235325256	180.666	635
chr1	235489835	235491640	.	1000	.	-1	355.101	-1	1506	5	5	235490073	235491532	116.976	1275	235489835	235491640	355.101	1499
chr1	235491732	235494314	.	1000	.	-1	178.193	-1	503	5	5	235491796	235494103	83.3495	233	235491732	235494314	178.193	709
chr1	235530172	235531752	.	1000	.	-1	167.988	-1	699	4.89	5	235530289	235531441	48.148	148	235530172	235531752	167.988	718
chr1	235666502	235669584	.	1000	.	-1	310.561	-1	2059	5	5	235666916	235669385	176.87	658	235666502	235669584	310.561	2053
chr1	236029575	236030687	.	1000	.	-1	124.164	-1	424	4.45	5	236029669	236030678	53.9707	216	236029575	236030687	124.164	405
chr1	236304785	236305689	.	857	.	-1	33.6764	-1	699	0.89	2.06	236305326	236305644	13.1468	171	236304785	236305689	33.6764	686
chr1	236305776	236306544	.	1000	.	-1	45.5991	-1	205	1.5	2.69	236305868	236306188	17.7316	142	236305776	236306544	45.5991	176
chr1	236665783	236667412	.	1000	.	-1	87.3122	-1	965	3.19	4.32	236666184	236667169	33.7032	530	236665783	236667412	87.3122	1000
chr1	236678607	236681575	.	1000	.	-1	57.7394	-1	1948	2.04	3.23	236680400	236681505	21.8247	188	236678607	236681575	57.7394	1916
chr1	236686237	236688697	.	1000	.	-1	197.669	-1	1348	5	5	236686636	236688332	68.8453	1032	236686237	236688697	197.669	1266
chr1	236767113	236768390	.	1000	.	-1	43.0025	-1	535	1.44	2.63	236767408	236768151	19.2348	168	236767113	236768390	43.0025	554
chr1	236958048	236959558	.	1000	.	-1	257.463	-1	752	5	5	236958108	236959558	81.4082	156	236958048	236959474	257.463	766
chr1	241682268	241683126	.	1000	.	-1	148.194	-1	607	4.63	5	241682369	241683068	47.4261	546	241682268	241683126	148.194	567
chr1	241802616	241805082	.	1000	.	-1	136.78	-1	784	4.67	5	241803002	241804221	53.1274	279	241802616	241805082	136.78	795
chr1	241911656	241914211	.	860	.	-1	66.7196	-1	1308	0.89	2.07	241912558	241913326	12.932	467	241911656	241914211	66.7196	1247
chr1	242010839	242012024	.	1000	.	-1	440.877	-1	494	5	5	242010867	242011865	160.607	477	242010839	242012024	440.877	484
chr1	243417439	243420145	.	1000	.	-1	199.933	-1	1553	5	5	243417439	243419876	52.4064	862	243417472	243420145	199.933	1521
chr1	244485128	244487806	.	1000	.	-1	78.1314	-1	1042	2.7	3.87	244485128	244487213	25.922	529	244485179	244487806	78.1314	1149
chr1	244613936	244616300	.	1000	.	-1	321.841	-1	1081	5	5	244614293	244616031	100.939	444	244613936	244616300	321.841	1077
chr1	244623515	244625589	.	1000	.	-1	205.025	-1	1399	4.97	5	244623850	244625487	45.5177	1060	244623515	244625589	205.025	1404
chr1	244815606	244817198	.	1000	.	-1	161.773	-1	956	5	5	244815825	244816867	63.4101	141	244815606	244817198	161.773	965
chr1	244996551	245000595	.	1000	.	-1	594.413	-1	1861	5	5	244996990	244999981	240.942	1413	244996551	245000595	594.413	1871
chr1	245025711	245028795	.	1000	.	-1	563.064	-1	1313	5	5	245026035	245028735	161.058	989	245025711	245028795	563.064	1313
chr1	245132270	245135719	.	1000	.	-1	527.096	-1	2016	5	5	245132878	245135259	193.935	1406	245132270	245135719	527.096	2019
chr1	246669897	246670997	.	1000	.	-1	55.8044	-1	546	2.09	3.27	246670013	246670754	24.5704	434	246669897	246670997	55.8044	542
chr1	246728654	246730840	.	1000	.	-1	225.852	-1	1278	5	5	246728908	246730443	62.0399	344	246728654	246730840	225.852	1267
chr1	246866546	246868816	.	1000	.	-1	41.7563	-1	1913	1.39	2.58	246866711	246868674	20.803	201	246866546	246868816	41.7563	1978
chr1	246886906	246889707	.	1000	.	-1	237.619	-1	953	5	5	246886987	246889519	128.946	315	246886906	246889707	237.619	950
chr1	247093065	247096104	.	1000	.	-1	329.273	-1	2007	5	5	247093898	247095874	116.043	1161	247093065	247096104	329.273	2020
chr1	247170439	247171380	.	1000	.	-1	67.1397	-1	658	2.66	3.83	247170515	247171360	36.4924	604	247170439	247171380	67.1397	636
chr1	247241491	247242230	.	1000	.	-1	62.9716	-1	430	2.4	3.56	247241577	247242088	27.8885	325	247241491	247242230	62.9716	450
chr1	247266692	247267827	.	1000	.	-1	242.476	-1	770	5	5	247266968	247267696	69.4719	508	247266692	247267827	242.476	756
chr1	247274555	247275577	.	1000	.	-1	55.8072	-1	478	2.14	3.32	247274800	247275226	30.1021	261	247274555	247275577	55.8072	451
chr1	247289515	247290490	.	1000	.	-1	179.208	-1	414	5	5	247289724	247290334	54.8975	203	247289515	247290490	179.208	416
chr1	247334442	247335520	.	1000	.	-1	148.194	-1	626	5	5	247334508	247335312	68.3594	536	247334442	247335520	148.194	650
chr1	247373387	247374556	.	1000	.	-1	141.06	-1	569	3.86	4.95	247373605	247374147	34.1516	347	247373387	247374556	141.06	573
chr1	247493983	247496117	.	1000	.	-1	235.028	-1	850	5	5	247494152	247495825	77.0047	689	247493983	247496117	235.028	842
chr1	249119438	249121462	.	1000	.	-1	345.685	-1	934	5	5	249119506	249121174	127.109	863	249119438	249121462	345.685	937
chr1	249131579	249134198	.	1000	.	-1	503.176	-1	1104	5	5	249131802	249133864	200.981	301	249131579	249134198	503.176	1116
chr1	249151433	249154142	.	1000	.	-1	326.881	-1	1144	5	5	249151499	249153922	119.926	1039	249151433	249154142	326.881	1183
chr1	249157056	249158060	.	1000	.	-1	44.5874	-1	333	1.46	2.65	249157177	249157889	17.4347	231	249157056	249158060	44.5874	314
chr1	249199830	249200840	.	1000	.	-1	232.395	-1	742	5	5	249199909	249200767	75.5486	670	249199830	249200840	232.395	736
chr2	35165	39471	.	1000	.	-1	58.1719	-1	536	2.23	3.4	35350	38745	28.5732	260	35165	39471	58.1719	504
chr2	43694	47703	.	1000	.	-1	199.123	-1	3146	5	5	44813	47398	64.6764	867	43694	47703	199.123	3181
chr2	263341	265930	.	1000	.	-1	260.188	-1	1370	5	5	263861	265469	54.7244	360	263341	265930	260.188	985
chr2	675533	678673	.	1000	.	-1	471.028	-1	1783	5	5	675607	678160	162.46	580	675533	678673	471.028	1787
chr2	725078	728277	.	1000	.	-1	61.7904	-1	1569	2.4	3.56	725105	727404	42.0984	419	725078	728277	61.7904	1520
chr2	739002	742103	.	1000	.	-1	225.831	-1	1449	5	5	739640	741131	64.4156	646	739002	742103	225.831	1614
chr2	799331	800098	.	1000	.	-1	58.3212	-1	478	1.79	2.98	799554	800007	18.1055	331	799331	800098	58.3212	403
chr2	1627504	1630951	.	1000	.	-1	180.219	-1	1458	5	5	1628542	1630471	49.4201	439	1627504	1630951	180.219	1440
chr2	1633832	1637780	.	1000	.	-1	127.104	-1	1598	3.54	4.66	1634854	1636809	31.5021	536	1633832	1637780	127.104	1613
chr2	1747491	1748578	.	1000	.	-1	78.6407	-1	211	1.8	2.98	1747532	1748576	17.0799	152	1747491	1748578	78.6407	230
chr2	3372373	3373979	.	1000	.	-1	255.335	-1	831	5	5	3372760	3373505	109.037	464	3372373	3373979	255.335	811
chr2	3380798	3382624	.	1000	.	-1	159.51	-1	1229	4.62	5	3380981	3382498	44.5696	374	3380798	3382624	159.51	1231
chr2	3382880	3384521	.	1000	.	-1	216.003	-1	774	5	5	3383010	3384130	57.3966	668	3382880	3384521	216.003	750
chr2	3521885	3523718	.	1000	.	-1	435.248	-1	1278	5	5	3522090	3523686	183.019	1062	3521885	3523718	435.248	1290
chr2	3604954	3607196	.	1000	.	-1	228.054	-1	757	5	5	3605312	3606952	84.2728	414	3604954	3607196	228.054	743
chr2	3622205	3624672	.	1000	.	-1	265.32	-1	975	5	5	3622328	3623889	91.014	789	3622205	3624672	265.32	1039
chr2	5835784	5837729	.	1000	.	-1	80.5594	-1	1043	3.15	4.28	5835987	5837551	38.5167	773	5835784	5837729	80.5594	1111
chr2	6320905	6323703	.	1000	.	-1	110.117	-1	1170	3.22	4.35	6321188	6323346	28.6443	259	6320905	6323703	110.117	1180
chr2	7930950	7934287	.	1000	.	-1	95.8623	-1	2246	2.18	3.35	7931337	7934287	19.3728	583	7930950	7934157	95.8623	2152
chr2	8679138	8681397	.	1000	.	-1	82.9436	-1	1119	2.97	4.12	8679618	8681041	30.1604	264	8679138	8681397	82.9436	829
chr2	8711418	8715600	.	1000	.	-1	175.489	-1	2687	4.53	5	8711849	8715013	41.3509	980	8711418	8715600	175.489	2757
chr2	8816481	8821852	.	1000	.	-1	176.277	-1	2854	5	5	8817042	8821807	59.9457	401	8816481	8821852	176.277	2849
chr2	8822154	8824181	.	1000	.	-1	57.1091	-1	236	2.21	3.38	8822250	8823314	29.4733	101	8822154	8824181	57.1091	220
chr2	8824745	8826277	.	1000	.	-1	252.411	-1	1038	5	5	8824826	8826060	86.4132	1026	8824745	8826277	252.411	969
chr2	8977148	8977869	.	1000	.	-1	104.949	-1	317	2.58	3.74	8977208	8977734	22.3593	186	8977148	8977869	104.949	388
chr2	9143230	9144890	.	1000	.	-1	162.366	-1	1106	5	5	9143354	9144715	64.6489	980	9143230	9144890	162.366	1109
chr2	9346231	9348347	.	1000	.	-1	143.63	-1	1111	4.91	5	9346286	9348325	57.1963	280	9346231	9348347	143.63	1104
chr2	9562321	9564550	.	1000	.	-1	329.774	-1	1164	5	5	9562648	9564405	146.379	833	9562321	9564550	329.774	1169
chr2	9613742	9615753	.	1000	.	-1	241.317	-1	1131	5	5	9613883	9615584	91.4992	964	9613742	9615753	241.317	1158
chr2	9694738	9697395	.	1000	.	-1	415.594	-1	1622	5	5	9695046	9697180	168.646	1326	9694738	9697395	415.594	1610
chr2	9769345	9771744	.	1000	.	-1	280.827	-1	1687	5	5	9769924	9771744	93.3954	621	9769345	9771673	280.827	1694
chr2	9948438	9950012	.	1000	.	-1	77.7727	-1	959	1.52	2.71	9948508	9949942	15.8215	670	9948438	9950012	77.7727	1179
chr2	9970152	9970582	.	889	.	-1	34.3862	-1	193	0.95	2.14	9970235	9970504	19.2589	86	9970152	9970582	34.3862	218
chr2	9970678	9972103	.	1000	.	-1	91.7294	-1	311	3.36	4.48	9970691	9971688	36.0079	327	9970678	9972103	91.7294	283
chr2	9982823	9985222	.	1000	.	-1	363.24	-1	895	5	5	9982856	9984642	193.794	862	9982823	9985222	363.24	895
chr2	10090793	10094898	.	1000	.	-1	319.614	-1	1449	5	5	10090861	10094868	93.373	265	10090793	10094898	319.614	1482
chr2	10183670	10184915	.	1000	.	-1	181.893	-1	208	5	5	10183720	10184108	49.1275	170	10183670	10184915	181.893	196
chr2	10197016	10198587	.	986	.	-1	52.3704	-1	913	1.18	2.38	10197332	10198326	13.8253	198	10197016	10198587	52.3704	638
chr2	10259545	10263942	.	1000	.	-1	390.36	-1	2082	5	5	10259884	10263708	160.52	2683	10259545	10263942	390.36	1142
chr2	10425264	10427439	.	921	.	-1	35.4861	-1	1089	1.03	2.22	10425528	10426824	15.259	975	10425264	10427439	35.4861	939
chr2	10442048	10444633	.	1000	.	-1	151.069	-1	819	4.93	5	10442264	10444174	54.4762	215	10442048	10444633	151.069	455
chr2	10544564	10546195	.	1000	.	-1	60.4651	-1	888	2.36	3.52	10544777	10546090	36.3468	435	10544564	10546195	60.4651	857
chr2	10547352	10549893	.	1000	.	-1	97.3145	-1	1227	3.75	4.84	10547352	10549272	47.4465	1498	10547398	10549893	97.3145	911
chr2	10587766	10588657	.	1000	.	-1	56.0701	-1	437	1.83	3.01	10587965	10588603	53.3773	303	10587766	10588657	56.0701	372
chr2	10829410	10830923	.	1000	.	-1	232.165	-1	849	5	5	10829546	10830663	66.9404	702	10829410	10830923	232.165	861
chr2	10951594	10953651	.	1000	.	-1	286.044	-1	1143	5	5	10951919	10953417	132.637	480	10951594	10953651	286.044	1121
chr2	11242518	11245806	.	1000	.	-1	68.931	-1	1756	2.59	3.75	11243333	11245097	28.0917	420	11242518	11245806	68.931	2198
chr2	11294445	11295241	.	1000	.	-1	165.176	-1	522	5	5	11294591	11295228	71.6262	380	11294445	11295241	165.176	518
chr2	11295481	11296326	.	1000	.	-1	181.806	-1	292	5	5	11295517	11296234	62.3159	260	11295481	11296326	181.806	289
chr2	11483332	11485739	.	1000	.	-1	234.826	-1	1112	5	5	11483467	11485557	82.9116	903	11483332	11485739	234.826	1186
chr2	11603509	11607002	.	1000	.	-1	378.941	-1	2634	5	5	11605220	11606903	135.566	937	11603509	11607002	378.941	2620
chr2	11617069	11627489	.	1000	.	-1	577.976	-1	5939	5	5	11618419	11626500	227.954	942	11617069	11627489	577.976	5811
chr2	11636843	11649159	.	1000	.	-1	309.569	-1	2571	5	5	11637080	11648572	60.1253	537	11636843	11649159	309.569	2572
chr2	11649241	11655064	.	1000	.	-1	132.082	-1	3558	1.6	2.8	11649798	11654335	17.6879	500	11649241	11655064	132.082	3539
chr2	11667389	11705912	.	1000	.	-1	476.167	-1	12765	5	5	11667963	11705353	129.41	707	11667389	11705912	476.167	12786
chr2	11720771	11727417	.	1000	.	-1	88.8704	-1	3324	2.86	4.01	11721745	11724454	26.0294	629	11720771	11727417	88.8704	3171
chr2	11886421	11887500	.	1000	.	-1	109.097	-1	644	3.7	4.8	11886736	11887405	37.3578	362	11886421	11887500	109.097	611
chr2	12808138	12809398	.	1000	.	-1	61.9894	-1	813	1.47	2.66	12808537	12809175	15.1979	380	12808138	12809398	61.9894	848
chr2	12855308	12859112	.	1000	.	-1	240.763	-1	1358	5	5	12855774	12859071	108.649	322	12855308	12859112	240.763	1354
chr2	15700708	15701689	.	1000	.	-1	59.3762	-1	607	2.28	3.44	15701040	15701436	29.0474	300	15700708	15701689	59.3762	582
chr2	15731270	15732951	.	1000	.	-1	357.487	-1	920	5	5	15731532	15732698	129.007	643	15731270	15732951	357.487	935
chr2	16955977	16957983	.	1000	.	-1	49.9749	-1	669	1.81	2.99	16956101	16957573	23.1835	279	16955977	16957983	49.9749	701
chr2	16961591	16965187	.	1000	.	-1	52.3133	-1	2622	1.95	3.13	16961665	16964844	29.4733	483	16961591	16965187	52.3133	2697
chr2	16999135	17000705	.	893	.	-1	35.9894	-1	565	0.96	2.15	16999409	16999846	13.5356	305	16999135	17000705	35.9894	551
chr2	17934252	17936470	.	1000	.	-1	476.506	-1	1002	5	5	17934453	17936068	177.94	788	17934252	17936470	476.506	1016
chr2	18740982	18742404	.	1000	.	-1	282.56	-1	745	5	5	18741313	18742301	125.054	409	18740982	18742404	282.56	750
chr2	19339918	19340669	.	1000	.	-1	79.9197	-1	488	3.01	4.15	19339981	19340669	33.4382	419	19339918	19340643	79.9197	495
chr2	19340810	19342118	.	1000	.	-1	57.0155	-1	370	2.18	3.36	19340895	19342061	30.4334	253	19340810	19342118	57.0155	402
chr2	19504740	19506162	.	1000	.	-1	63.2928	-1	1176	2.39	3.55	19505239	19506129	26.8331	707	19504740	19506162	63.2928	1146
chr2	19547045	19548455	.	1000	.	-1	213.019	-1	609	5	5	19547145	19548197	90.3351	499	19547045	19548455	213.019	620
chr2	20100382	20102967	.	1000	.	-1	258.21	-1	1237	5	5	20100894	20102720	169.514	728	20100382	20102967	258.21	1234
chr2	20189226	20190427	.	1000	.	-1	86.3085	-1	877	3.3	4.42	20189526	20190371	38.2064	555	20189226	20190427	86.3085	899
chr2	20249367	20253080	.	1000	.	-1	302.613	-1	2359	5	5	20250402	20252656	96.2462	1312	20249367	20253080	302.613	2372
chr2	20270499	20273727	.	1000	.	-1	118.871	-1	741	3.83	4.93	20270499	20273103	37.3231	811	20270542	20273727	118.871	651
chr2	20312933	20313901	.	1000	.	-1	40.617	-1	501	1.23	2.43	20313125	20313872	16.0706	234	20312933	20313901	40.617	576
chr2	20423197	20425699	.	1000	.	-1	74.9467	-1	868	2.99	4.13	20423274	20425295	38.8298	985	20423197	20425699	74.9467	674
chr2	20430748	20433059	.	1000	.	-1	126.866	-1	1129	2.34	3.51	20430948	20432788	21.1064	567	20430748	20433059	126.866	1099
chr2	20548193	20552229	.	1000	.	-1	444.503	-1	2087	5	5	20549185	20552025	173.976	295	20548193	20552229	444.503	2071
chr2	20646072	20652931	.	1000	.	-1	557.277	-1	977	5	5	20646152	20652922	197.956	244	20646072	20652931	557.277	984
chr2	20656601	20659564	.	1000	.	-1	80.5935	-1	1606	2.37	3.53	20656932	20659156	21.2776	430	20656601	20659564	80.5935	1645
chr2	20664259	20670056	.	1000	.	-1	295.417	-1	2140	5	5	20664888	20669934	119.789	950	20664259	20670056	295.417	2133
chr2	20671442	20676054	.	1000	.	-1	213.246	-1	2452	5	5	20671842	20675515	75.398	438	20671442	20676054	213.246	2477
chr2	20691423	20698084	.	1000	.	-1	202.281	-1	4959	4.85	5	20691949	20697315	44.0136	726	20691423	20698084	202.281	4884
chr2	20816892	20819399	.	1000	.	-1	177.694	-1	1302	4.86	5	20817164	20818970	46.5012	415	20816892	20819399	177.694	1286
chr2	20850236	20851692	.	1000	.	-1	178.794	-1	470	4.4	5	20850382	20851616	39.0668	275	20850236	20851692	178.794	452
chr2	21021527	21023295	.	1000	.	-1	241.145	-1	1137	5	5	21021666	21023176	72.6793	1023	21021527	21023295	241.145	1112
chr2	24147841	24151389	.	1000	.	-1	400.445	-1	1909	5	5	24148933	24150947	179.811	839	24147841	24151389	400.445	1887
chr2	24162581	24164394	.	1000	.	-1	262.721	-1	888	5	5	24162841	24163941	137.597	619	24162581	24164394	262.721	897
chr2	24238665	24240160	.	1000	.	-1	100.204	-1	274	2.47	3.63	24238779	24239704	21.4181	146	24238665	24240160	100.204	289
chr2	24298450	24300770	.	1000	.	-1	151.828	-1	616	4.79	5	24298762	24300514	50.4114	249	24298450	24300770	151.828	623
chr2	24306602	24308461	.	1000	.	-1	148.83	-1	937	4.4	5	24306602	24308260	42.2312	948	24306611	24308461	148.83	917
chr2	24345693	24347160	.	1000	.	-1	206.716	-1	792	5	5	24345823	24346973	88.6326	665	24345693	24347160	206.716	789
chr2	24582517	24583912	.	1000	.	-1	180.944	-1	875	5	5	24582520	24583870	78.4668	1040	24582517	24583912	180.944	708
chr2	24713365	24715189	.	1000	.	-1	58.3212	-1	891	2.09	3.28	24713549	24715034	22.4071	339	24713365	24715189	58.3212	905
chr2	25015166	25017408	.	1000	.	-1	535.351	-1	931	5	5	25015559	25017117	259.425	539	25015166	25017408	535.351	930
chr2	25028383	25030178	.	1000	.	-1	226.183	-1	739	5	5	25028461	25029597	65.3534	649	25028383	25030178	226.183	752
chr2	25193743	25196139	.	1000	.	-1	412.619	-1	1009	5	5	25193793	25195963	157.969	961	25193743	25196139	412.619	1008
chr2	25263944	25266040	.	1000	.	-1	114.463	-1	1332	4.33	5	25264265	25265895	59.9457	288	25263944	25266040	114.463	1343
chr2	25473964	25476110	.	1000	.	-1	292.614	-1	980	5	5	25474150	25475905	76.6798	799	25473964	25476110	292.614	975
chr2	25563881	25565715	.	987	.	-1	39.5282	-1	1385	1.18	2.38	25564283	25565443	15.0782	154	25563881	25565715	39.5282	1391
chr2	25895469	25896470	.	1000	.	-1	148.537	-1	667	4.1	5	25895469	25896450	37.1886	115	25895614	25896470	148.537	598
chr2	26100285	26102350	.	1000	.	-1	279.81	-1	767	5	5	26100404	26102136	81.9054	436	26100285	26102350	279.81	751
chr2	26204729	26205796	.	1000	.	-1	73.2516	-1	788	2.68	3.84	26204912	26205674	27.4886	593	26204729	26205796	73.2516	801
chr2	26234135	26237250	.	1000	.	-1	103.73	-1	724	3.62	4.72	26234354	26237106	37.2969	522	26234135	26237250	103.73	707
chr2	26255012	26258810	.	1000	.	-1	375.71	-1	2151	5	5	26255460	26257876	147.949	1689	26255012	26258810	375.71	2165
chr2	26465285	26468792	.	1000	.	-1	443.558	-1	2354	5	5	26465497	26468412	206.2	559	26465285	26468792	443.558	2353
chr2	26567845	26570441	.	1000	.	-1	185.538	-1	1037	5	5	26568143	26569818	101.731	314	26567845	26570441	185.538	1386
chr2	26577451	26579346	.	969	.	-1	94.4783	-1	1387	1.13	2.34	26577963	26579346	14.7328	135	26577451	26579330	94.4783	1349
chr2	26979864	26983075	.	1000	.	-1	194.969	-1	1487	5	5	26980603	26982497	50.2605	163	26979864	26983075	194.969	1475
chr2	26986347	26988531	.	1000	.	-1	146.812	-1	994	5	5	26986588	26987798	59.9457	751	26986347	26988531	146.812	996
chr2	27008023	27010145	.	1000	.	-1	134.967	-1	1066	4.98	5	27008203	27010039	75.2483	180	27008023	27010145	134.967	1066
chr2	27193362	27193904	.	1000	.	-1	95.7959	-1	274	3.56	4.68	27193448	27193877	39.7458	194	27193362	27193904	95.7959	269
chr2	27255321	27256600	.	1000	.	-1	178.963	-1	660	5	5	27255373	27256472	81.4991	617	27255321	27256600	178.963	651
chr2	27272497	27275268	.	1000	.	-1	161.404	-1	2136	5	5	27272643	27275242	56.5176	652	27272497	27275268	161.404	2119
chr2	27293309	27295206	.	1000	.	-1	235.539	-1	1068	5	5	27293909	27295036	60.5401	315	27293309	27295206	235.539	1070
chr2	27308352	27309513	.	1000	.	-1	201.641	-1	855	5	5	27308629	27309460	58.1739	576	27308352	27309513	201.641	858
chr2	27341224	27342143	.	1000	.	-1	44.3838	-1	525	1.57	2.77	27341380	27342107	22.7922	485	27341224	27342143	44.3838	409
chr2	27356250	27358084	.	1000	.	-1	240.39	-1	1078	5	5	27356772	27357998	54.9341	366	27356250	27358084	240.39	1075
chr2	27432192	27436684	.	1000	.	-1	437.987	-1	3172	5	5	27432509	27436172	180.229	1297	27432192	27436684	437.987	3196
chr2	27439680	27441390	.	1000	.	-1	226.451	-1	901	5	5	27439775	27441390	97.9771	853	27439680	27441340	226.451	854
chr2	27515101	27517897	.	1000	.	-1	173.447	-1	1664	5	5	27516027	27517609	50.6358	704	27515101	27517897	173.447	1699
chr2	27543054	27546858	.	1000	.	-1	326.641	-1	3082	5	5	27543353	27546540	120.741	627	27543054	27546858	326.641	3078
chr2	27578072	27581039	.	1000	.	-1	360.226	-1	1411	5	5	27578647	27580721	143.273	838	27578072	27581039	360.226	1409
chr2	27592142	27594536	.	1000	.	-1	340.994	-1	847	5	5	27592387	27594526	116.244	530	27592142	27594536	340.994	864
chr2	27631068	27633330	.	1000	.	-1	243.865	-1	1147	5	5	27631219	27633151	75.9031	1009	27631068	27633330	243.865	1135
chr2	27642894	27643934	.	1000	.	-1	52.7505	-1	747	1.53	2.72	27643151	27643794	16.1336	461	27642894	27643934	52.7505	776
chr2	27644058	27645837	.	1000	.	-1	43.8376	-1	559	1.5	2.69	27644240	27645518	20.0876	294	27644058	27645837	43.8376	576
chr2	27650405	27653114	.	1000	.	-1	495.415	-1	1295	5	5	27650619	27652497	192.233	1084	27650405	27653114	495.415	1292
chr2	27664897	27666377	.	1000	.	-1	136.946	-1	626	4.11	5	27665252	27666185	38.8298	300	27664897	27666377	136.946	598
chr2	27851091	27852654	.	1000	.	-1	95.5427	-1	984	3.16	4.29	27851211	27852362	29.7754	868	27851091	27852654	95.5427	980
chr2	27885614	27887383	.	1000	.	-1	235.028	-1	757	5	5	27885830	27887356	81.2047	523	27885614	27887383	235.028	776
chr2	27958056	27958968	.	1000	.	-1	67.7451	-1	327	2.61	3.77	27958192	27958839	30.3053	183	27958056	27958968	67.7451	335
chr2	27993909	27995579	.	1000	.	-1	198.552	-1	831	5	5	27994081	27995123	80.6261	660	27993909	27995579	198.552	831
chr2	28112517	28114450	.	1000	.	-1	355.101	-1	904	5	5	28112684	28114136	134.246	748	28112517	28114450	355.101	893
chr2	28598748	28602596	.	1000	.	-1	113.894	-1	2028	2.49	3.65	28599761	28601821	21.6421	1027	28598748	28602596	113.894	2017
chr2	28612368	28619607	.	1000	.	-1	480.98	-1	3581	5	5	28612863	28618932	183.456	1133	28612368	28619607	480.98	3578
chr2	28658777	28661434	.	1000	.	-1	142.362	-1	1316	4.9	5	28659122	28661120	57.1963	1034	28658777	28661434	142.362	1254
chr2	28905625	28906974	.	906	.	-1	36.0834	-1	661	0.99	2.18	28905746	28906434	13.974	515	28905625	28906974	36.0834	687
chr2	28973343	28976263	.	1000	.	-1	446.061	-1	1783	5	5	28973470	28975716	171.903	1648	28973343	28976263	446.061	1792
chr2	29092512	29094091	.	1000	.	-1	102.911	-1	940	3.86	4.96	29092747	29093822	47.3056	685	29092512	29094091	102.911	960
chr2	29116827	29118884	.	1000	.	-1	234.345	-1	1002	5	5	29116985	29118541	80.3517	276	29116827	29118884	234.345	948
chr2	29339842	29341965	.	1000	.	-1	55.213	-1	552	2.03	3.23	29340193	29341480	23.781	257	29339842	29341965	55.213	497
chr2	30369598	30371078	.	1000	.	-1	298.25	-1	426	5	5	30369824	30370908	62.2918	205	30369598	30371078	298.25	422
chr2	30669631	30670848	.	1000	.	-1	69.4945	-1	663	2.75	3.91	30669748	30670848	35.1468	614	30669631	30670797	69.4945	595
chr2	32234197	32236952	.	1000	.	-1	357.907	-1	1405	5	5	32234197	32236792	174.282	1426	32234234	32236952	357.907	1348
chr2	32263312	32265430	.	1000	.	-1	207.914	-1	1425	5	5	32264120	32265279	72.886	628	32263312	32265430	207.914	1415
chr2	32287632	32289671	.	1000	.	-1	230.08	-1	1219	5	5	32287999	32289594	92.8553	270	32287632	32289671	230.08	1216
chr2	32389910	32391652	.	1000	.	-1	195.351	-1	902	5	5	32390215	32391485	67.908	190	32389910	32391652	195.351	644
chr2	32502450	32503992	.	1000	.	-1	89.6755	-1	699	2.69	3.85	32502587	32503532	23.9063	146	32502450	32503992	89.6755	694
chr2	32581246	32583648	.	1000	.	-1	354.381	-1	1187	5	5	32581335	32583528	100.727	614	32581246	32583648	354.381	1208
chr2	33141165	33141798	.	1000	.	-1	68.3534	-1	314	2.64	3.8	33141190	33141770	54.3874	291	33141165	33141798	68.3534	313
chr2	33171486	33173507	.	1000	.	-1	267.187	-1	911	5	5	33171499	33173270	84.3294	829	33171486	33173507	267.187	981
chr2	33823415	33825106	.	1000	.	-1	106.125	-1	770	3.81	4.91	33823624	33825046	42.0984	380	33823415	33825106	106.125	750
chr2	35337546	35338407	.	1000	.	-1	136.965	-1	323	3.65	4.75	35337573	35338119	31.851	269	35337546	35338407	136.965	351
chr2	35516513	35517371	.	1000	.	-1	45.5394	-1	517	1.34	2.53	35516812	35517308	15.2817	282	35516513	35517371	45.5394	454
chr2	35520279	35525382	.	1000	.	-1	113.894	-1	2923	2.78	3.94	35521803	35524671	23.488	145	35520279	35525382	113.894	3058
chr2	36582414	36584346	.	1000	.	-1	63.6707	-1	694	2.48	3.64	36582437	36584232	30.3177	167	36582414	36584346	63.6707	705
chr2	36824539	36825561	.	1000	.	-1	344.697	-1	552	5	5	36824613	36825329	180.289	505	36824539	36825561	344.697	525
chr2	37192838	37194548	.	1000	.	-1	308.797	-1	688	5	5	37192995	37194499	123.133	349	37192838	37194548	308.797	684
chr2	37310737	37312206	.	1000	.	-1	120.965	-1	520	4.19	5	37310974	37311917	46.4419	186	37310737	37312206	120.965	539
chr2	37383275	37384740	.	1000	.	-1	177.883	-1	682	4.78	5	37383747	37384565	45.1875	192	37383275	37384740	177.883	700
chr2	37423215	37424575	.	1000	.	-1	227.954	-1	625	5	5	37423357	37424466	80.1985	407	37423215	37424575	227.954	701
chr2	37457771	37459649	.	1000	.	-1	206.014	-1	776	5	5	37458243	37459332	50.2826	330	37457771	37459649	206.014	751
chr2	37551129	37552056	.	1000	.	-1	54.4289	-1	606	1.32	2.51	37551428	37551981	14.4126	365	37551129	37552056	54.4289	549
chr2	38151913	38153436	.	1000	.	-1	180.299	-1	927	5	5	38151995	38153192	114.394	841	38151913	38153436	180.299	932
chr2	38299936	38305329	.	1000	.	-1	284.296	-1	4450	5	5	38300099	38305193	96.5141	1994	38299936	38305329	284.296	4444
chr2	38322234	38324862	.	1000	.	-1	133.465	-1	1184	4.91	5	38322339	38324862	70.8657	436	38322234	38324787	133.465	766
chr2	38373239	38375662	.	930	.	-1	36.5686	-1	870	1.05	2.24	38373391	38375662	14.9061	610	38373239	38375611	36.5686	511
chr2	38603132	38605290	.	1000	.	-1	317.781	-1	1087	5	5	38603287	38605285	148.904	536	38603132	38605290	317.781	1103
chr2	38828510	38830858	.	1000	.	-1	422.096	-1	1346	5	5	38828942	38830673	144.712	546	38828510	38830858	422.096	1342
chr2	38912417	38913383	.	917	.	-1	50.0029	-1	585	1.02	2.21	38912417	38913283	13.0753	636	38912445	38913383	50.0029	506
chr2	38917069	38919006	.	1000	.	-1	95.7919	-1	1112	1.68	2.87	38917506	38918785	17.0285	171	38917069	38919006	95.7919	690
chr2	38977102	38979116	.	1000	.	-1	360.792	-1	1158	5	5	38977530	38979088	143.039	741	38977102	38979116	360.792	1147
chr2	39004906	39005942	.	1000	.	-1	59.0124	-1	635	2.09	3.28	39005369	39005806	22.3593	183	39004906	39005942	59.0124	625
chr2	39102410	39103560	.	1000	.	-1	58.1719	-1	495	1.92	3.1	39102527	39103057	19.4775	356	39102410	39103560	58.1719	518
chr2	39346345	39349549	.	1000	.	-1	369.163	-1	1709	5	5	39346905	39349157	166.333	1128	39346345	39349549	369.163	1731
chr2	39350510	39352299	.	1000	.	-1	187.918	-1	744	5	5	39350626	39352274	81.6257	622	39350510	39352299	187.918	750
chr2	39407740	39408632	.	1000	.	-1	59.127	-1	374	1.65	2.84	39407790	39408274	16.6777	362	39407740	39408632	59.127	336
chr2	39663529	39665302	.	1000	.	-1	288.67	-1	680	5	5	39663693	39665120	121.516	545	39663529	39665302	288.67	652
chr2	40005446	40006563	.	1000	.	-1	171.636	-1	769	5	5	40005775	40006417	55.1822	439	40005446	40006563	171.636	770
chr2	40465104	40466024	.	1000	.	-1	41.5368	-1	373	1.34	2.53	40465291	40465568	17.5519	104	40465104	40466024	41.5368	456
chr2	41683060	41684233	.	992	.	-1	57.0169	-1	926	1.19	2.39	41683286	41684184	13.974	710	41683060	41684233	57.0169	916
chr2	41684427	41685716	.	1000	.	-1	70.4841	-1	441	2.2	3.38	41684588	41685237	20.7052	201	41684427	41685716	70.4841	521
chr2	42068083	42068790	.	1000	.	-1	99.8382	-1	302	2.73	3.89	42068162	42068589	23.5166	262	42068083	42068790	99.8382	264
chr2	42396459	42397423	.	1000	.	-1	175.489	-1	206	4.98	5	42396483	42397182	48.8593	169	42396459	42397423	175.489	220
chr2	42568441	42570760	.	1000	.	-1	109.686	-1	1073	3.71	4.81	42569064	42570322	37.2969	349	42568441	42570760	109.686	1032
chr2	42586967	42589215	.	1000	.	-1	397.326	-1	1542	5	5	42587702	42588700	208.745	805	42586967	42589215	397.326	1545
chr2	42785104	42791414	.	1000	.	-1	193.654	-1	4748	5	5	42785104	42791258	58.3684	515	42785231	42791414	193.654	4934
chr2	42795075	42797338	.	1000	.	-1	340.838	-1	947	5	5	42795135	42797028	156.96	878	42795075	42797338	340.838	956
chr2	43036296	43038476	.	1000	.	-1	437.343	-1	1151	5	5	43036700	43038430	205.796	755	43036296	43038476	437.343	1144
chr2	43357359	43359505	.	1000	.	-1	64.4294	-1	1259	2.17	3.35	43357643	43359384	21.3315	430	43357359	43359505	64.4294	1132
chr2	43446333	43451668	.	1000	.	-1	115.262	-1	929	3.79	4.88	43446333	43451668	37.2969	333	43446516	43451636	115.262	651
chr2	43451932	43455734	.	1000	.	-1	463.101	-1	2202	5	5	43451999	43455494	188.85	2150	43451932	43455734	463.101	2188
chr2	43519934	43522364	.	1000	.	-1	61.4884	-1	1236	1.26	2.46	43519934	43521668	14.1034	271	43520069	43522364	61.4884	1495
chr2	43526577	43529098	.	898	.	-1	37.865	-1	1397	0.97	2.16	43526910	43528984	13.1468	177	43526577	43529098	37.865	1656
chr2	43652756	43655272	.	1000	.	-1	90.0465	-1	1451	1.71	2.9	43652761	43654503	17.0309	428	43652756	43655272	90.0465	1373
chr2	43678404	43679497	.	877	.	-1	39.2137	-1	731	0.92	2.11	43678793	43679360	33.4235	426	43678404	43679497	39.2137	647
chr2	43679889	43680959	.	930	.	-1	36.4579	-1	450	1.05	2.24	43679889	43680939	14.9673	190	43679950	43680959	36.4579	461
chr2	43687634	43692501	.	1000	.	-1	67.7602	-1	2902	2.42	3.58	43687634	43692369	24.4883	700	43687775	43692501	67.7602	2308
chr2	43704313	43705769	.	1000	.	-1	41.9594	-1	862	1.43	2.61	43704623	43705542	21.8247	567	43704313	43705769	41.9594	847
chr2	43705859	43707868	.	924	.	-1	40.0938	-1	994	1.04	2.23	43706839	43707681	13.3439	152	43705859	43707868	40.0938	297
chr2	43822341	43824153	.	1000	.	-1	206.716	-1	667	5	5	43822569	43824028	60.3385	437	43822341	43824153	206.716	669
chr2	44001129	44001878	.	1000	.	-1	79.8581	-1	226	2.47	3.63	44001192	44001878	22.3944	179	44001129	44001866	79.8581	211
chr2	44222118	44224155	.	1000	.	-1	393.635	-1	809	5	5	44222399	44223948	102.646	524	44222118	44224155	393.635	814
chr2	44394458	44395688	.	1000	.	-1	286.669	-1	915	5	5	44394484	44395605	100.839	267	44394458	44395688	286.669	921
chr2	44395877	44397734	.	1000	.	-1	240.28	-1	356	5	5	44395990	44397048	67.628	267	44395877	44397734	240.28	332
chr2	44588054	44589924	.	1000	.	-1	383.158	-1	777	5	5	44588119	44589873	162.871	720	44588054	44589924	383.158	769
chr2	45837270	45839040	.	1000	.	-1	207.15	-1	920	5	5	45837551	45838905	67.2274	372	45837270	45839040	207.15	876
chr2	45877046	45879491	.	1000	.	-1	112.125	-1	1529	4.03	5	45877163	45878967	45.8796	1417	45877046	45879491	112.125	1524
chr2	45901225	45904100	.	1000	.	-1	88.5594	-1	1480	2.18	3.36	45901485	45903554	19.4587	600	45901225	45904100	88.5594	1787
chr2	46636556	46637347	.	1000	.	-1	39.5282	-1	267	1.28	2.47	46636599	46637187	18.1055	186	46636556	46637347	39.5282	306
chr2	46769116	46771221	.	1000	.	-1	91.4393	-1	410	3.25	4.38	46769144	46771221	32.6975	489	46769116	46771189	91.4393	398
chr2	46842897	46844849	.	1000	.	-1	247.011	-1	1066	5	5	46843498	46844577	91.9322	260	46842897	46844849	247.011	1095
chr2	46925108	46927241	.	1000	.	-1	272.235	-1	1395	5	5	46925318	46927119	95.3745	392	46925108	46927241	272.235	1362
chr2	47142259	47144194	.	1000	.	-1	276.417	-1	481	5	5	47142379	47143874	113.252	377	47142259	47144194	276.417	466
chr2	47167431	47169716	.	1000	.	-1	180.458	-1	1373	5	5	47167594	47169639	75.4411	462	47167431	47169716	180.458	1387
chr2	47193528	47198402	.	1000	.	-1	164.003	-1	2004	5	5	47193808	47197924	55.9886	615	47193528	47198402	164.003	1994
chr2	47295805	47297675	.	1000	.	-1	56.1165	-1	794	1.75	2.93	47296448	47297520	17.937	112	47295805	47297675	56.1165	760
chr2	47402133	47404635	.	1000	.	-1	420.154	-1	1192	5	5	47402308	47404403	163.697	1034	47402133	47404635	420.154	1176
chr2	47566324	47568784	.	1000	.	-1	132.254	-1	1451	3.87	4.97	47566427	47568341	35.3835	500	47566324	47568784	132.254	1400
chr2	47571495	47573389	.	1000	.	-1	228.911	-1	1044	5	5	47571902	47573145	68.781	641	47571495	47573389	228.911	1040
chr2	47595552	47597932	.	1000	.	-1	469.498	-1	1078	5	5	47595765	47597652	172.411	831	47595552	47597932	469.498	1113
chr2	47629418	47631260	.	1000	.	-1	298.641	-1	1067	5	5	47629807	47631256	87.2204	227	47629418	47631260	298.641	1064
chr2	47978001	47980956	.	1000	.	-1	64.8726	-1	1523	2.41	3.56	47978234	47980853	25.922	427	47978001	47980956	64.8726	1549
chr2	48009523	48012423	.	1000	.	-1	248.671	-1	949	5	5	48009606	48012114	80.092	269	48009523	48012423	248.671	956
chr2	48131757	48134713	.	1000	.	-1	413.208	-1	1408	5	5	48131918	48134349	170.09	722	48131757	48134713	413.208	1447
chr2	48338243	48339533	.	1000	.	-1	66.963	-1	565	2.57	3.73	48338486	48339352	52.5921	450	48338243	48339533	66.963	438
chr2	48540964	48543241	.	1000	.	-1	210.815	-1	1171	5	5	48541531	48542967	77.2301	467	48540964	48543241	210.815	1308
chr2	48667182	48668713	.	1000	.	-1	219.593	-1	943	5	5	48667269	48668613	73.0426	832	48667182	48668713	219.593	968
chr2	48975914	48979317	.	1000	.	-1	59.8366	-1	1397	2.33	3.49	48975914	48978933	29.9948	1378	48976035	48979317	59.8366	1296
chr2	48993969	48996915	.	1000	.	-1	56.0446	-1	1015	2.04	3.24	48993969	48996728	22.8632	310	48994000	48996915	56.0446	1017
chr2	49005285	49006352	.	869	.	-1	36.2146	-1	573	0.91	2.09	49005387	49006288	12.86	420	49005285	49006352	36.2146	625
chr2	53994615	53995714	.	1000	.	-1	69.4202	-1	534	2.19	3.37	53994765	53995402	20.698	364	53994615	53995714	69.4202	555
chr2	54013352	54015210	.	1000	.	-1	149.258	-1	986	4.11	5	54013627	54014733	37.2203	710	54013352	54015210	149.258	988
chr2	54196731	54198772	.	1000	.	-1	282.136	-1	1310	5	5	54197050	54198600	78.4668	998	54196731	54198772	282.136	1303
chr2	54342216	54343625	.	1000	.	-1	429.416	-1	603	5	5	54342385	54343412	207.185	432	54342216	54343625	429.416	606
chr2	54784486	54788295	.	1000	.	-1	134.991	-1	731	4.64	5	54784636	54787996	53.1274	454	54784486	54788295	134.991	800
chr2	54949884	54951240	.	1000	.	-1	54.337	-1	494	1.96	3.15	54950124	54951159	22.671	246	54949884	54951240	54.337	475
chr2	55275179	55278609	.	1000	.	-1	245.154	-1	1973	5	5	55275831	55278609	91.2604	734	55275179	55278525	245.154	2065
chr2	55450478	55451007	.	1000	.	-1	59.2914	-1	288	2.26	3.44	55450554	55450963	40.6878	222	55450478	55451007	59.2914	279
chr2	55458513	55461111	.	1000	.	-1	325.21	-1	1121	5	5	55458515	55460577	159.212	1109	55458513	55461111	325.21	1132
chr2	55495261	55497151	.	1000	.	-1	169.294	-1	846	4.78	5	55495870	55497050	46.1796	186	55495261	55497151	169.294	898
chr2	55508852	55510370	.	1000	.	-1	200.979	-1	728	5	5	55508920	55510034	58.8387	654	55508852	55510370	200.979	735
chr2	55745797	55747669	.	1000	.	-1	129.941	-1	611	3.7	4.8	55745985	55747405	32.9707	286	55745797	55747669	129.941	608
chr2	55842345	55846077	.	1000	.	-1	487.021	-1	2241	5	5	55843690	55846009	173.795	577	55842345	55846077	487.021	2227
chr2	55920218	55921421	.	1000	.	-1	58.3212	-1	590	2.24	3.42	55920282	55920975	29.1445	556	55920218	55921421	58.3212	560
chr2	56005879	56008267	.	1000	.	-1	78.6407	-1	677	3.03	4.17	56006079	56008191	35.486	351	56005879	56008267	78.6407	694
chr2	56020276	56021834	.	1000	.	-1	149.722	-1	871	4.98	5	56020421	56021615	56.387	201	56020276	56021834	149.722	938
chr2	56065064	56067553	.	1000	.	-1	83.9668	-1	1142	3.12	4.26	56065558	56067416	33.8414	431	56065064	56067553	83.9668	1120
chr2	56150568	56151197	.	937	.	-1	36.4579	-1	219	1.07	2.26	56150633	56151197	21.519	177	56150568	56151102	36.4579	196
chr2	58272925	58274801	.	1000	.	-1	176.668	-1	1144	5	5	58273102	58274662	96.4648	336	58272925	58274801	176.668	1174
chr2	58467809	58468896	.	1000	.	-1	190.044	-1	486	5	5	58468051	58468886	61.6025	254	58467809	58468896	190.044	477
chr2	60983324	60984140	.	1000	.	-1	77.171	-1	226	2.45	3.61	60983406	60984007	22.5108	157	60983324	60984140	77.171	213
chr2	61107584	61113547	.	1000	.	-1	304.9	-1	1300	5	5	61107926	61112685	109.102	517	61107584	61113547	304.9	1319
chr2	61134167	61137410	.	1000	.	-1	63.9477	-1	645	2.39	3.55	61134167	61137013	26.0664	237	61134204	61137410	63.9477	734
chr2	61240654	61246301	.	1000	.	-1	389.321	-1	3852	5	5	61241688	61246167	192.252	913	61240654	61246301	389.321	3855
chr2	61292598	61293935	.	1000	.	-1	217.975	-1	583	5	5	61292969	61293783	62.5318	185	61292598	61293935	217.975	611
chr2	61371432	61372884	.	1000	.	-1	71.5839	-1	763	2	3.19	61371654	61372799	18.7088	226	61371432	61372884	71.5839	1017
chr2	61403464	61405668	.	1000	.	-1	445.863	-1	1311	5	5	61403709	61405668	170.09	1069	61403464	61405636	445.863	1309
chr2	61696960	61699625	.	1000	.	-1	379.835	-1	1695	5	5	61697257	61699138	130.605	1397	61696960	61699625	379.835	1696
chr2	61763264	61766727	.	1000	.	-1	435.732	-1	1831	5	5	61763746	61766409	162.027	1337	61763264	61766727	435.732	1843
chr2	61921393	61922370	.	1000	.	-1	41.9315	-1	490	1.36	2.55	61921487	61921798	17.6409	182	61921393	61922370	41.9315	704
chr2	61990335	61992198	.	1000	.	-1	271.635	-1	874	5	5	61990557	61992007	108.609	417	61990335	61992198	271.635	856
chr2	62080719	62082688	.	1000	.	-1	120.355	-1	361	3.96	5	62080921	62082176	39.9683	111	62080719	62082688	120.355	370
chr2	62114391	62116622	.	1000	.	-1	358.886	-1	1518	5	5	62115070	62116406	157.428	834	62114391	62116622	358.886	1523
chr2	62132487	62133364	.	1000	.	-1	66.5729	-1	447	1.56	2.75	62132578	62133076	15.9115	330	62132487	62133364	66.5729	474
chr2	62422633	62425276	.	1000	.	-1	198.261	-1	818	5	5	62422690	62424607	50.5374	729	62422633	62425276	198.261	851
chr2	62520183	62521692	.	1000	.	-1	100.195	-1	752	3.59	4.7	62520268	62521585	37.5834	634	62520183	62521692	100.195	786
chr2	62531148	62536009	.	1000	.	-1	163.898	-1	3351	5	5	62531669	62535713	55.5364	2836	62531148	62536009	163.898	3345
chr2	62732639	62733908	.	1000	.	-1	57.7394	-1	638	2.12	3.31	62732772	62733727	23.8082	483	62732639	62733908	57.7394	660
chr2	62931732	62932549	.	1000	.	-1	85.9521	-1	535	2.15	3.33	62931952	62932420	19.2348	333	62931732	62932549	85.9521	518
chr2	62932661	62933702	.	1000	.	-1	221.511	-1	364	5	5	62932849	62933534	90.0962	183	62932661	62933702	221.511	358
chr2	63276979	63278750	.	1000	.	-1	137.784	-1	539	4.85	5	63276979	63278509	59.0583	441	63277006	63278750	137.784	538
chr2	63814854	63816795	.	1000	.	-1	158.84	-1	1416	5	5	63815056	63816702	78.1727	484	63814854	63816795	158.84	1425
chr2	64067462	64069469	.	1000	.	-1	277.367	-1	943	5	5	64067633	64069254	88.0469	226	64067462	64069469	277.367	976
chr2	64245172	64246866	.	1000	.	-1	139.93	-1	1244	4.89	5	64245604	64246851	58.6374	839	64245172	64246866	139.93	1217
chr2	64370714	64371657	.	1000	.	-1	97.2577	-1	613	3.29	4.41	64370893	64371514	31.573	434	64370714	64371657	97.2577	613
chr2	64680697	64682217	.	1000	.	-1	56.7975	-1	669	2.14	3.32	64680968	64682217	37.5192	435	64680697	64682147	56.7975	632
chr2	64750602	64752501	.	1000	.	-1	235.849	-1	1098	5	5	64750843	64752228	59.19	238	64750602	64752501	235.849	1113
chr2	64836083	64837124	.	1000	.	-1	60.7604	-1	306	1.31	2.5	64836173	64837045	14.3025	211	64836083	64837124	60.7604	312
chr2	64879332	64881998	.	1000	.	-1	311.274	-1	1492	5	5	64879794	64881883	96.6655	609	64879332	64881998	311.274	1451
chr2	64977251	64979354	.	1000	.	-1	204.636	-1	1544	5	5	64977355	64979162	81.2948	467	64977251	64979354	204.636	1549
chr2	65282655	65284324	.	1000	.	-1	179.342	-1	1081	5	5	65282948	65284177	67.421	175	65282655	65284324	179.342	1074
chr2	65356233	65358304	.	1000	.	-1	210.468	-1	873	5	5	65356494	65358213	66.9404	433	65356233	65358304	210.468	865
chr2	65454051	65456484	.	1000	.	-1	383.764	-1	1090	5	5	65454282	65456146	120.541	234	65454051	65456484	383.764	1129
chr2	65536990	65537588	.	1000	.	-1	59.8366	-1	253	1.32	2.51	65537072	65537512	14.3867	164	65536990	65537588	59.8366	260
chr2	65657613	65660483	.	1000	.	-1	140.263	-1	1934	5	5	65658089	65660399	69.7847	1451	65657613	65660483	140.263	1941
chr2	65662913	65663810	.	1000	.	-1	89.0531	-1	366	3.52	4.64	65663001	65663735	49.1275	319	65662913	65663810	89.0531	326
chr2	66617237	66618780	.	926	.	-1	36.7634	-1	1241	1.04	2.23	66617299	66618665	14.5044	361	66617237	66618780	36.7634	1237
chr2	66660763	66663061	.	1000	.	-1	53.4667	-1	1074	1.87	3.06	66660868	66662759	21.1824	294	66660763	66663061	53.4667	1697
chr2	67624072	67625897	.	1000	.	-1	282.136	-1	642	5	5	67624441	67625554	103.288	297	67624072	67625897	282.136	619
chr2	68289457	68290593	.	1000	.	-1	100.195	-1	542	2.34	3.5	68289760	68290423	20.5539	261	68289457	68290593	100.195	520
chr2	68383844	68385937	.	1000	.	-1	281.99	-1	958	5	5	68384168	68385464	141.062	630	68383844	68385937	281.99	962
chr2	68477780	68480810	.	1000	.	-1	256.164	-1	1754	5	5	68478409	68480607	120.5	1114	68477780	68480810	256.164	1766
chr2	69613491	69615272	.	1000	.	-1	179.854	-1	726	5	5	69613697	69615002	68.8453	529	69613491	69615272	179.854	717
chr2	69663228	69665398	.	1000	.	-1	254.61	-1	1177	5	5	69663764	69665104	119.789	645	69663228	69665398	254.61	1174
chr2	69869938	69872051	.	1000	.	-1	347.081	-1	1136	5	5	69869986	69871995	171.495	1084	69869938	69872051	347.081	1140
chr2	69967492	69969903	.	1000	.	-1	305.273	-1	1458	5	5	69968198	69969778	118.329	753	69967492	69969903	305.273	1457
chr2	70055854	70057622	.	1000	.	-1	135.456	-1	651	4.3	5	70056114	70057572	43.0299	400	70055854	70057622	135.456	642
chr2	70120613	70122075	.	1000	.	-1	87.3122	-1	645	2.99	4.13	70121066	70122075	29.0528	186	70120613	70122054	87.3122	651
chr2	70140604	70141900	.	1000	.	-1	351.646	-1	914	5	5	70140717	70141748	159.056	819	70140604	70141900	351.646	896
chr2	70142168	70143935	.	1000	.	-1	181.972	-1	596	3.31	4.43	70142222	70143283	28.0917	612	70142168	70143935	181.972	527
chr2	70261439	70262876	.	1000	.	-1	56.181	-1	767	1.25	2.44	70261682	70262626	14.1034	334	70261439	70262876	56.181	958
chr2	70312077	70317187	.	1000	.	-1	584.169	-1	1749	5	5	70312502	70316859	316.078	1494	70312077	70317187	584.169	1579
chr2	70335316	70336947	.	1000	.	-1	90.1698	-1	859	3.02	4.16	70335614	70336793	28.2825	817	70335316	70336947	90.1698	604
chr2	70350560	70353154	.	1000	.	-1	397.663	-1	1749	5	5	70350632	70352922	148.922	1695	70350560	70353154	397.663	1732
chr2	70367398	70371521	.	1000	.	-1	584.574	-1	1949	5	5	70367648	70370785	286.801	1034	70367398	70371521	584.574	1864
chr2	70416724	70418622	.	1000	.	-1	105.994	-1	1132	3.77	4.86	70417156	70418181	40.7371	541	70416724	70418622	105.994	1291
chr2	70474558	70476348	.	1000	.	-1	378.738	-1	998	5	5	70474901	70476175	133.095	675	70474558	70476348	378.738	979
chr2	70484285	70486334	.	1000	.	-1	152.217	-1	743	5	5	70484454	70485998	64.546	563	70484285	70486334	152.217	754
chr2	70518717	70521854	.	1000	.	-1	272.674	-1	1969	5	5	70519534	70521408	97.4893	440	70518717	70521854	272.674	1957
chr2	70528043	70529499	.	1000	.	-1	392.311	-1	924	5	5	70528334	70529230	121.078	626	70528043	70529499	392.311	932
chr2	70780358	70781504	.	937	.	-1	39.7352	-1	802	1.07	2.26	70780700	70781330	13.84	438	70780358	70781504	39.7352	824
chr2	71114355	71115351	.	1000	.	-1	97.2577	-1	405	3.48	4.6	71114469	71115341	36.3468	280	71114355	71115351	97.2577	417
chr2	71127361	71129289	.	1000	.	-1	43.6963	-1	864	1.43	2.62	71127361	71129259	17.7316	522	71127381	71129289	43.6963	1186
chr2	71221150	71222758	.	1000	.	-1	178.575	-1	634	5	5	71221501	71222432	49.1275	212	71221150	71222758	178.575	637
chr2	71294627	71296430	.	1000	.	-1	273.242	-1	901	5	5	71294719	71296430	141.277	830	71294627	71296409	273.242	880
chr2	71354223	71358683	.	1000	.	-1	392.097	-1	3002	5	5	71355615	71358319	174.916	547	71354223	71358683	392.097	3018
chr2	71453565	71454260	.	1000	.	-1	84.2772	-1	442	3.03	4.17	71453764	71454196	31.1236	221	71453565	71454260	84.2772	465
chr2	71503214	71504396	.	1000	.	-1	111.839	-1	623	4.23	5	71503214	71504275	58.5237	183	71503229	71504396	111.839	605
chr2	71558315	71560132	.	1000	.	-1	294.749	-1	711	5	5	71558831	71559547	110.84	179	71558315	71560132	294.749	728
chr2	71643797	71645322	.	1000	.	-1	57.1091	-1	673	2.07	3.26	71644134	71645026	22.5804	166	71643797	71645322	57.1091	843
chr2	71973676	71975598	.	1000	.	-1	76.7412	-1	968	2.94	4.08	71973815	71975598	33.8327	568	71973676	71975430	76.7412	948
chr2	72342056	72343931	.	1000	.	-1	62.3475	-1	1204	2.32	3.48	72342360	72343931	24.9381	324	72342056	72343882	62.3475	1138
chr2	73052418	73053280	.	1000	.	-1	61.9894	-1	441	2.37	3.54	73052616	73053201	27.9829	217	73052418	73053280	61.9894	467
chr2	73113930	73115339	.	1000	.	-1	226.016	-1	799	5	5	73114035	73115146	103.901	675	73113930	73115339	226.016	819
chr2	73209667	73215637	.	1000	.	-1	70.7478	-1	3543	2.48	3.64	73210701	73215305	24.5704	404	73209667	73215637	70.7478	2802
chr2	73296811	73299192	.	1000	.	-1	349.456	-1	1899	5	5	73297376	73299167	141.726	1314	73296811	73299192	349.456	1920
chr2	73440779	73442310	.	1000	.	-1	221.136	-1	791	5	5	73440907	73442055	85.7716	152	73440779	73442310	221.136	797
chr2	73459889	73462639	.	1000	.	-1	250.139	-1	1766	5	5	73460002	73462182	115.148	580	73459889	73462639	250.139	1767
chr2	73495656	73497268	.	1000	.	-1	81.4483	-1	488	2.84	3.99	73495684	73497062	27.9003	427	73495656	73497268	81.4483	521
chr2	73612386	73614680	.	1000	.	-1	255.341	-1	890	5	5	73612550	73613862	104.006	743	73612386	73614680	255.341	874
chr2	73963519	73965103	.	1000	.	-1	73.1485	-1	1049	2.76	3.92	73964021	73965066	29.4473	234	73963519	73965103	73.1485	786
chr2	74006238	74007385	.	1000	.	-1	168.774	-1	835	4.84	5	74006693	74007252	47.237	371	74006238	74007385	168.774	845
chr2	74055490	74056842	.	1000	.	-1	185.223	-1	760	5	5	74055669	74056737	89.6436	170	74055490	74056842	185.223	748
chr2	74152375	74154837	.	1000	.	-1	244.748	-1	1794	5	5	74153164	74154549	86.731	169	74152375	74154837	244.748	1799
chr2	74209211	74213694	.	1000	.	-1	577.951	-1	2420	5	5	74210062	74213379	229.617	1536	74209211	74213694	577.951	2453
chr2	74235816	74238775	.	1000	.	-1	77.171	-1	1311	2.88	4.03	74235868	74238334	31.3532	723	74235816	74238775	77.171	1234
chr2	74346824	74348171	.	1000	.	-1	595.493	-1	761	5	5	74347097	74348016	294.521	495	74346824	74348171	595.493	754
chr2	74374239	74375395	.	1000	.	-1	103.93	-1	617	3.94	5	74374239	74375395	50.4529	351	74374283	74375319	103.93	573
chr2	74404301	74406906	.	1000	.	-1	312.981	-1	1512	5	5	74405308	74406647	113.701	420	74404301	74406906	312.981	1490
chr2	74424914	74427616	.	1000	.	-1	472.495	-1	1088	5	5	74425097	74426679	111.536	262	74424914	74427616	472.495	1139
chr2	74430241	74435018	.	1000	.	-1	226.621	-1	3422	3.52	4.64	74431932	74434110	31.4278	1744	74430241	74435018	226.621	3409
chr2	74618148	74619451	.	1000	.	-1	423.857	-1	943	5	5	74618358	74619310	155.777	726	74618148	74619451	423.857	950
chr2	74647873	74649755	.	1000	.	-1	118.106	-1	716	4.35	5	74648082	74649527	55.8523	336	74647873	74649755	118.106	713
chr2	74667259	74669903	.	1000	.	-1	101.166	-1	2051	3.21	4.34	74667370	74669563	29.1932	297	74667259	74669903	101.166	2012
chr2	74682125	74683451	.	1000	.	-1	50.7908	-1	264	1.75	2.94	74682220	74682820	19.9782	181	74682125	74683451	50.7908	253
chr2	74683637	74687533	.	1000	.	-1	495.881	-1	1331	5	5	74684072	74686642	208.098	586	74683637	74687533	495.881	1322
chr2	74691273	74693480	.	1000	.	-1	279.526	-1	1079	5	5	74691494	74693147	87.3587	846	74691273	74693480	279.526	1092
chr2	74698300	74700762	.	1000	.	-1	328.426	-1	1232	5	5	74698552	74700534	155.977	958	74698300	74700762	328.426	1254
chr2	74708650	74710840	.	1000	.	-1	260.355	-1	1268	5	5	74708906	74710816	101.731	1024	74708650	74710840	260.355	1257
chr2	74729347	74730967	.	1000	.	-1	144.347	-1	836	4.64	5	74729475	74730807	48.5949	869	74729347	74730967	144.347	676
chr2	74732799	74735707	.	1000	.	-1	427.115	-1	1889	5	5	74733012	74735499	235.584	580	74732799	74735707	427.115	1884
chr2	74755748	74758107	.	1000	.	-1	391.791	-1	923	5	5	74756054	74757941	173.287	600	74755748	74758107	391.791	940
chr2	74775603	74777290	.	1000	.	-1	193.738	-1	864	5	5	74775641	74777105	48.6172	850	74775603	74777290	193.738	841
chr2	75061204	75063004	.	1000	.	-1	77.171	-1	1037	1.87	3.06	75061264	75062555	17.6594	857	75061204	75063004	77.171	1157
chr2	75070344	75075053	.	1000	.	-1	138.01	-1	2686	3.54	4.65	75071236	75073911	30.3177	1721	75070344	75075053	138.01	2760
chr2	75185249	75186647	.	1000	.	-1	318.504	-1	635	5	5	75185309	75186121	144.825	576	75185249	75186647	318.504	635
chr2	75873380	75874898	.	1000	.	-1	214.243	-1	734	5	5	75873433	75874700	84.8534	671	75873380	75874898	214.243	745
chr2	75937335	75938502	.	1000	.	-1	214.811	-1	643	5	5	75937516	75938212	103.526	471	75937335	75938502	214.811	634
chr2	76495259	76498770	.	1000	.	-1	61.2517	-1	1923	1.5	2.69	76496345	76498193	15.4558	617	76495259	76498770	61.2517	1820
chr2	78768237	78769152	.	1000	.	-1	53.5131	-1	531	2.01	3.2	78768505	78769016	26.8331	225	78768237	78769152	53.5131	570
chr2	84330794	84332285	.	1000	.	-1	119.86	-1	478	2.7	3.86	84331117	84332011	23.18	156	84330794	84332285	119.86	477
chr2	84685746	84687251	.	1000	.	-1	207.813	-1	807	5	5	84685908	84687186	109.18	650	84685746	84687251	207.813	803
chr2	85131880	85135594	.	1000	.	-1	492.455	-1	1093	5	5	85132242	85135467	170.273	718	85131880	85135594	492.455	1107
chr2	85196432	85199920	.	1000	.	-1	277.079	-1	1741	5	5	85196853	85199670	118.329	1764	85196432	85199920	277.079	1297
chr2	85553881	85555958	.	1000	.	-1	385.122	-1	1422	5	5	85553881	85555858	156.354	618	85553983	85555958	385.122	1310
chr2	85580680	85582535	.	1000	.	-1	79.167	-1	1047	2.93	4.07	85581063	85582364	30.855	300	85580680	85582535	79.167	1338
chr2	85620879	85626384	.	1000	.	-1	386.031	-1	3183	5	5	85621062	85626092	106.896	3631	85620879	85626384	386.031	2552
chr2	85645030	85647279	.	1000	.	-1	378.779	-1	675	5	5	85645185	85646811	139.012	506	85645030	85647279	378.779	689
chr2	85764371	85768030	.	1000	.	-1	563.833	-1	1666	5	5	85764618	85767429	283.501	1420	85764371	85768030	563.833	1666
chr2	85788002	85789647	.	1000	.	-1	200.206	-1	883	5	5	85788233	85789487	70.3943	638	85788002	85789647	200.206	898
chr2	85803930	85806145	.	1000	.	-1	173.75	-1	990	5	5	85804638	85805545	62.0226	292	85803930	85806145	173.75	980
chr2	85821762	85823873	.	1000	.	-1	174.372	-1	997	5	5	85822208	85823263	75.6988	252	85821762	85823873	174.372	733
chr2	85828781	85831316	.	1000	.	-1	157.933	-1	881	4.84	5	85829307	85830906	49.1275	362	85828781	85831316	157.933	874
chr2	85838112	85839841	.	1000	.	-1	293.111	-1	851	5	5	85838390	85839744	88.0469	557	85838112	85839841	293.111	867
chr2	85842609	85844372	.	1000	.	-1	203.161	-1	857	5	5	85842800	85844104	81.4991	664	85842609	85844372	203.161	859
chr2	86181399	86183654	.	880	.	-1	36.4579	-1	929	0.93	2.12	86181577	86182933	13.1468	161	86181399	86183654	36.4579	1501
chr2	86332136	86334172	.	1000	.	-1	225.517	-1	1382	5	5	86332454	86334120	75.6186	1067	86332136	86334172	225.517	1380
chr2	86421516	86423729	.	1000	.	-1	465.224	-1	908	5	5	86421726	86423682	98.5202	199	86421516	86423729	465.224	923
chr2	86425847	86427248	.	1000	.	-1	65.2154	-1	720	2.56	3.72	86426020	86427097	31.9671	754	86425847	86427248	65.2154	513
chr2	86667376	86669849	.	1000	.	-1	268.648	-1	740	5	5	86667468	86669515	122.857	643	86667376	86669849	268.648	745
chr2	86789559	86791062	.	1000	.	-1	517.912	-1	683	5	5	86789650	86791020	220.753	595	86789559	86791062	517.912	680
chr2	86848373	86851704	.	1000	.	-1	284.857	-1	1912	5	5	86849602	86851464	79.483	768	86848373	86851704	284.857	1828
chr2	86858898	86860906	.	943	.	-1	54.4248	-1	1140	1.08	2.27	86859691	86860566	13.1468	575	86858898	86860906	54.4248	912
chr2	86946002	86948944	.	1000	.	-1	273.149	-1	1255	5	5	86946247	86948550	100.255	1003	86946002	86948944	273.149	1263
chr2	87034130	87035896	.	1000	.	-1	54.337	-1	974	1.9	3.08	87034737	87035507	21.1789	399	87034130	87035896	54.337	943
chr2	87302162	87304943	.	1000	.	-1	340.838	-1	2016	5	5	87302440	87304718	118.608	1742	87302162	87304943	340.838	2013
chr2	87575173	87576831	.	1000	.	-1	91.4154	-1	1023	3.3	4.42	87575338	87576599	34.3473	819	87575173	87576831	91.4154	1062
chr2	87754415	87757773	.	1000	.	-1	108.371	-1	770	3.93	5	87754563	87757403	45.0923	323	87754415	87757773	108.371	851
chr2	87778567	87788041	.	1000	.	-1	278.015	-1	7340	5	5	87779553	87787967	94.1961	1862	87778567	87788041	278.015	7352
chr2	87794698	87800985	.	1000	.	-1	88.328	-1	1975	2.77	3.93	87795840	87800776	25.0682	413	87794698	87800985	88.328	2111
chr2	87835519	87837560	.	1000	.	-1	62.3475	-1	962	2.01	3.2	87835715	87837386	19.7002	717	87835519	87837560	62.3475	1012
chr2	87892331	87895231	.	1000	.	-1	60.8296	-1	1347	2.37	3.53	87892730	87894872	35.1468	164	87892331	87895231	60.8296	1377
chr2	87927518	87930316	.	1000	.	-1	94.3389	-1	932	3.48	4.6	87927714	87929979	38.0345	539	87927518	87930316	94.3389	935
chr2	87930609	87937560	.	1000	.	-1	311.927	-1	3767	5	5	87930736	87937494	117.564	2289	87930609	87937560	311.927	3693
chr2	87937682	87941578	.	1000	.	-1	46.0125	-1	1720	1.59	2.79	87937897	87941154	29.1932	385	87937682	87941578	46.0125	663
chr2	87956448	87964015	.	1000	.	-1	185.863	-1	5180	5	5	87956783	87963730	100.186	1571	87956448	87964015	185.863	5175
chr2	88315612	88317333	.	1000	.	-1	376.94	-1	596	5	5	88316008	88317090	167.95	206	88315612	88317333	376.94	591
chr2	88353710	88356036	.	1000	.	-1	441.43	-1	1398	5	5	88353895	88355906	182.631	1183	88353710	88356036	441.43	1428
chr2	88469338	88470570	.	1000	.	-1	159.128	-1	655	4.95	5	88469409	88470570	51.7862	583	88469338	88470524	159.128	656
chr2	88925838	88927149	.	1000	.	-1	279.096	-1	972	5	5	88926051	88927027	87.1804	755	88925838	88927149	279.096	977
chr2	88927229	88928624	.	1000	.	-1	185.846	-1	332	5	5	88927367	88928377	75.5486	188	88927229	88928624	185.846	339
chr2	88958414	88960186	.	1000	.	-1	79.0858	-1	531	1.52	2.71	88958568	88959792	15.8215	298	88958414	88960186	79.0858	531
chr2	88990088	88991972	.	1000	.	-1	166.617	-1	708	4.78	5	88990598	88991778	46.5012	214	88990088	88991972	166.617	702
chr2	91750170	91751601	.	1000	.	-1	46.1963	-1	804	1.63	2.83	91750354	91751484	26.7319	735	91750170	91751601	46.1963	689
chr2	91847046	91848367	.	1000	.	-1	113.385	-1	806	4.19	5	91847349	91848065	52.9373	531	91847046	91848367	113.385	778
chr2	92323071	92326151	.	961	.	-1	43.0056	-1	2067	1.12	2.32	92323071	92326151	37.9267	519	92323082	92326116	43.0056	866
chr2	95786719	95788346	.	1000	.	-1	480.07	-1	936	5	5	95786911	95788101	226.615	738	95786719	95788346	480.07	942
chr2	95824400	95825379	.	1000	.	-1	75.8497	-1	779	2.79	3.95	95824601	95825366	29.1445	591	95824400	95825379	75.8497	766
chr2	95830568	95832139	.	1000	.	-1	358.922	-1	717	5	5	95830724	95832102	133.183	551	95830568	95832139	358.922	728
chr2	95872438	95873661	.	1000	.	-1	108.371	-1	641	2.93	4.07	95872585	95873499	25.2249	479	95872438	95873661	108.371	657
chr2	95939516	95942839	.	1000	.	-1	245.553	-1	889	5	5	95939705	95942238	82.2088	415	95939516	95942839	245.553	911
chr2	96067724	96069133	.	1000	.	-1	85.6994	-1	690	3.28	4.4	96067793	96069133	38.3376	268	96067724	96069116	85.6994	907
chr2	96191589	96193878	.	1000	.	-1	247.859	-1	759	5	5	96191920	96193553	83.7788	435	96191589	96193878	247.859	752
chr2	96656389	96658809	.	1000	.	-1	516.562	-1	1541	5	5	96656892	96658741	199.574	1058	96656389	96658809	516.562	1522
chr2	96872795	96875530	.	1000	.	-1	410.063	-1	1534	5	5	96873429	96875279	172.216	898	96872795	96875530	410.063	1536
chr2	96930664	96933167	.	1000	.	-1	245.912	-1	1491	5	5	96930919	96932715	89.548	459	96930664	96933167	245.912	1508
chr2	96970322	96972123	.	1000	.	-1	381.329	-1	777	5	5	96970762	96972028	94.7046	348	96970322	96972123	381.329	766
chr2	97000502	97002587	.	1000	.	-1	350.081	-1	800	5	5	97000502	97002409	129.053	784	97000745	97002587	350.081	574
chr2	97302421	97304653	.	1000	.	-1	271.398	-1	1521	5	5	97303234	97304507	112.635	714	97302421	97304653	271.398	1515
chr2	97404956	97405882	.	1000	.	-1	162.32	-1	646	5	5	97404956	97405863	72.6543	655	97404977	97405882	162.32	617
chr2	97425912	97431850	.	1000	.	-1	169.777	-1	4057	5	5	97426028	97431437	65.9588	885	97425912	97431850	169.777	4068
chr2	97435003	97439131	.	1000	.	-1	54.4248	-1	2403	2.01	3.21	97435293	97438663	24.5731	164	97435003	97439131	54.4248	2377
chr2	97481035	97483611	.	1000	.	-1	411.519	-1	1095	5	5	97481360	97483392	191.845	770	97481035	97483611	411.519	1095
chr2	97498181	97499831	.	946	.	-1	45.6538	-1	755	1.09	2.28	97498519	97499348	13.1627	650	97498181	97499831	45.6538	522
chr2	97522524	97528522	.	1000	.	-1	411.411	-1	993	5	5	97522635	97525841	124.608	549	97522524	97528522	411.411	970
chr2	97528639	97565500	.	1000	.	-1	689.401	-1	6842	5	5	97530134	97565272	351.827	1656	97528639	97565500	689.401	6801
chr2	97629115	97631930	.	1000	.	-1	111.026	-1	1505	2.01	3.2	97629608	97631288	18.7999	261	97629115	97631930	111.026	1833
chr2	97778119	97780478	.	1000	.	-1	481.967	-1	883	5	5	97778228	97779967	184.468	787	97778119	97780478	481.967	871
chr2	98205050	98207528	.	1000	.	-1	548.231	-1	1805	5	5	98205907	98207417	198.701	755	98205050	98207528	548.231	1998
chr2	98261207	98263639	.	1000	.	-1	283.033	-1	1474	5	5	98261601	98263352	66.4721	336	98261207	98263639	283.033	1475
chr2	98278807	98281682	.	1000	.	-1	326.91	-1	1353	5	5	98279297	98281379	179.988	930	98278807	98281682	326.91	1286
chr2	98610945	98613801	.	1000	.	-1	398.591	-1	1616	5	5	98611512	98613319	143.721	1058	98610945	98613801	398.591	1607
chr2	99060833	99062227	.	1000	.	-1	62.2742	-1	773	2.45	3.6	99060944	99061979	33.9036	511	99060833	99062227	62.2742	925
chr2	99224202	99226208	.	1000	.	-1	399.635	-1	1013	5	5	99224401	99226047	169.983	795	99224202	99226208	399.635	1033
chr2	99345927	99347462	.	1000	.	-1	180.458	-1	1102	5	5	99346606	99347422	68.3594	410	99345927	99347462	180.458	1116
chr2	99347658	99348738	.	1000	.	-1	235.028	-1	322	5	5	99347703	99348425	72.6543	231	99347658	99348738	235.028	368
chr2	99408485	99412041	.	1000	.	-1	140.906	-1	2060	3.77	4.86	99408934	99411423	32.9707	575	99408485	99412041	140.906	1995
chr2	99485270	99486494	.	1000	.	-1	43.0829	-1	634	1.29	2.48	99485378	99486280	15.5024	238	99485270	99486494	43.0829	922
chr2	99756790	99759183	.	1000	.	-1	301.068	-1	1052	5	5	99757155	99758687	69.9775	665	99756790	99759183	301.068	1074
chr2	99770995	99772377	.	1000	.	-1	116.414	-1	653	2.79	3.95	99771164	99771974	23.6536	455	99770995	99772377	116.414	683
chr2	99796679	99798640	.	1000	.	-1	100.201	-1	939	3.23	4.36	99797197	99798259	30.1604	170	99796679	99798640	100.201	1185
chr2	99951962	99954753	.	1000	.	-1	181.824	-1	733	5	5	99952279	99954739	74.5938	365	99951962	99954753	181.824	729
chr2	100105429	100107427	.	1000	.	-1	382.324	-1	892	5	5	100105540	100107370	119.902	763	100105429	100107427	382.324	911
chr2	100905858	100910550	.	1000	.	-1	294.151	-1	2289	5	5	100906496	100910293	113.836	523	100905858	100910550	294.151	2251
chr2	100935263	100939502	.	1000	.	-1	336.348	-1	3248	5	5	100936831	100939235	109.565	1696	100935263	100939502	336.348	3233
chr2	101033461	101034542	.	1000	.	-1	78.6407	-1	429	3.14	4.28	101033590	101034418	43.4871	327	101033461	101034542	78.6407	402
chr2	101178560	101180855	.	1000	.	-1	427.931	-1	1004	5	5	101178767	101180222	220.95	790	101178560	101180855	427.931	1012
chr2	101618247	101619937	.	1000	.	-1	287.43	-1	797	5	5	101618305	101619879	95.6167	261	101618247	101619937	287.43	764
chr2	101729627	101731273	.	1000	.	-1	43.0025	-1	631	1.4	2.59	101729627	101730791	17.7402	136	101729703	101731273	43.0025	533
chr2	101767064	101768535	.	1000	.	-1	74.9754	-1	1166	2.88	4.02	101767146	101768514	32.5605	149	101767064	101768535	74.9754	1199
chr2	101867888	101870542	.	1000	.	-1	396.975	-1	1636	5	5	101868406	101870072	164.54	1140	101867888	101870542	396.975	1614
chr2	101922992	101925944	.	1000	.	-1	267.257	-1	1985	5	5	101923641	101925809	95.4778	413	101922992	101925944	267.257	1997
chr2	101943460	101945899	.	1000	.	-1	137.003	-1	1276	4.09	5	101943460	101945552	38.3689	351	101943593	101945899	137.003	1199
chr2	103352738	103353733	.	1000	.	-1	95.7959	-1	467	3.68	4.78	103352926	103353733	46.1796	314	103352738	103353689	95.7959	433
chr2	105653928	105655248	.	1000	.	-1	130.119	-1	737	4.01	5	105653970	105655248	38.476	165	105653928	105655174	130.119	740
chr2	105945081	105947627	.	1000	.	-1	236.776	-1	1319	5	5	105945763	105946940	93.3954	179	105945081	105947627	236.776	1351
chr2	105952923	105954942	.	1000	.	-1	373.409	-1	924	5	5	105953325	105954710	150.263	535	105952923	105954942	373.409	911
chr2	106012437	106015989	.	1000	.	-1	83.3251	-1	2844	2.9	4.05	106014683	106015811	28.0917	391	106012437	106015989	83.3251	2780
chr2	106360621	106361245	.	1000	.	-1	48.0842	-1	446	1.74	2.92	106360871	106361236	26.8331	207	106360621	106361245	48.0842	435
chr2	106361441	106362210	.	1000	.	-1	78.6407	-1	279	2.97	4.11	106361441	106362210	32.6975	278	106361446	106362174	78.6407	276
chr2	106809744	106810822	.	1000	.	-1	149.722	-1	808	4.71	5	106809932	106810762	48.5949	615	106809744	106810822	149.722	813
chr2	106810918	106811492	.	1000	.	-1	64.9417	-1	239	1.52	2.71	106811027	106811331	15.5024	118	106810918	106811492	64.9417	251
chr2	107191792	107192557	.	909	.	-1	34.9214	-1	491	1	2.19	107191961	107192449	15.0103	349	107191792	107192557	34.9214	464
chr2	109064722	109066835	.	1000	.	-1	155.093	-1	656	5	5	109064978	109066298	85.7523	278	109064722	109066835	155.093	662
chr2	109149732	109151515	.	1000	.	-1	330.038	-1	811	5	5	109149980	109151503	136.125	573	109149732	109151515	330.038	802
chr2	109335140	109336958	.	1000	.	-1	308.889	-1	982	5	5	109335243	109336809	54.7022	901	109335140	109336958	308.889	960
chr2	109402763	109404054	.	1000	.	-1	147.219	-1	658	4.8	5	109402843	109403761	52.0944	586	109402763	109404054	147.219	650
chr2	110023072	110025466	.	1000	.	-1	77.4551	-1	1628	2.97	4.11	110023448	110025188	33.8327	422	110023072	110025466	77.4551	1617
chr2	110371116	110372629	.	1000	.	-1	79.167	-1	776	3.01	4.15	110371116	110372446	33.7125	1029	110371172	110372629	79.167	467
chr2	110551642	110552955	.	1000	.	-1	100.195	-1	332	2.88	4.03	110551849	110552898	25.2249	120	110551642	110552955	100.195	337
chr2	110744150	110745911	.	1000	.	-1	54.2458	-1	933	2.04	3.23	110744150	110745508	27.9829	1155	110744238	110745911	54.2458	624
chr2	110755866	110758371	.	1000	.	-1	110.385	-1	1099	4.05	5	110755887	110757697	48.4679	477	110755866	110758371	110.385	321
chr2	110969217	110970587	.	1000	.	-1	151.253	-1	776	5	5	110969660	110970326	74.5179	345	110969217	110970587	151.253	765
chr2	111128388	111130629	.	1000	.	-1	150.325	-1	1168	5	5	111128683	111130621	68.3594	260	111128388	111130629	150.325	1169
chr2	111140783	111142458	.	1000	.	-1	45.5889	-1	771	1.6	2.79	111141129	111142321	21.3067	140	111140783	111142458	45.5889	1056
chr2	111333786	111334952	.	1000	.	-1	103.151	-1	867	3.11	4.24	111333902	111334826	27.9003	749	111333786	111334952	103.151	869
chr2	111434923	111436685	.	1000	.	-1	233.154	-1	807	5	5	111434923	111436408	64.546	514	111434985	111436685	233.154	1039
chr2	111805852	111809348	.	1000	.	-1	52.4543	-1	1573	1.63	2.83	111806352	111809348	48.5949	1024	111805852	111809348	52.4543	762
chr2	111825181	111826226	.	1000	.	-1	68.2203	-1	743	2.59	3.75	111825181	111826144	28.8063	778	111825268	111826226	68.2203	622
chr2	111877485	111881838	.	1000	.	-1	299.374	-1	617	5	5	111877626	111881689	115.148	462	111877485	111881838	299.374	631
chr2	112043807	112051710	.	1000	.	-1	159.247	-1	1565	5	5	112044348	112051441	56.4004	635	112043807	112051710	159.247	1551
chr2	112070573	112080467	.	1000	.	-1	194.969	-1	3008	5	5	112070573	112080295	81.4082	627	112070786	112080467	194.969	2792
chr2	112112695	112115775	.	1000	.	-1	60.4651	-1	1855	1.47	2.66	112113107	112115324	15.2082	1755	112112695	112115775	60.4651	1544
chr2	112163832	112165212	.	1000	.	-1	47.6659	-1	1078	1.47	2.66	112164496	112165112	16.414	441	112163832	112165212	47.6659	1051
chr2	112170301	112172231	.	1000	.	-1	48.0573	-1	1392	1.73	2.92	112170531	112172135	26.9465	243	112170301	112172231	48.0573	1701
chr2	112207314	112212124	.	1000	.	-1	65.858	-1	3976	2.47	3.63	112207913	112212060	27.2472	1292	112207314	112212124	65.858	3822
chr2	112219358	112226597	.	1000	.	-1	258.734	-1	2070	5	5	112219505	112226443	81.2948	401	112219358	112226597	258.734	2092
chr2	112250217	112253232	.	1000	.	-1	139.277	-1	2198	4.85	5	112250722	112253157	57.3383	757	112250217	112253232	139.277	2162
chr2	112269304	112270922	.	997	.	-1	40.7255	-1	681	1.2	2.4	112269427	112270862	15.0782	360	112269304	112270922	40.7255	698
chr2	112455517	112457773	.	1000	.	-1	59.3112	-1	1046	2.3	3.46	112456186	112457382	31.5021	193	112455517	112457773	59.3112	1173
chr2	112640788	112642604	.	1000	.	-1	256.915	-1	967	5	5	112641094	112642453	94.8645	836	112640788	112642604	256.915	793
chr2	112811549	112814454	.	1000	.	-1	352.559	-1	1523	5	5	112811844	112813866	137.86	214	112811549	112814454	352.559	1567
chr2	113011791	113013248	.	1000	.	-1	144.843	-1	597	4.63	5	113011880	113013075	48.0237	417	113011791	113013248	144.843	688
chr2	113032497	113034417	.	1000	.	-1	608.833	-1	840	5	5	113032609	113034300	232.345	711	113032497	113034417	608.833	857
chr2	113190215	113191287	.	1000	.	-1	106.125	-1	828	3.9	4.98	113190758	113191225	45.2006	288	113190215	113191287	106.125	825
chr2	113238293	113240674	.	1000	.	-1	158.924	-1	1213	5	5	113238852	113240622	54.4762	407	113238293	113240674	158.924	1219
chr2	113299075	113301222	.	1000	.	-1	207.398	-1	771	5	5	113299276	113300581	64.3077	583	113299075	113301222	207.398	758
chr2	113340782	113343535	.	1000	.	-1	360.822	-1	1477	5	5	113341270	113343136	150.656	989	113340782	113343535	360.822	1477
chr2	113347756	113350534	.	1000	.	-1	51.79	-1	1321	1.38	2.57	113348617	113350411	15.0782	124	113347756	113350534	51.79	933
chr2	113402422	113404583	.	1000	.	-1	379.835	-1	1286	5	5	113402616	113404363	123.43	1101	113402422	113404583	379.835	1278
chr2	113521506	113523007	.	1000	.	-1	118.352	-1	520	3.55	4.66	113521678	113522862	32.5317	245	113521506	113523007	118.352	505
chr2	113835253	113837701	.	1000	.	-1	74.5694	-1	1335	1.47	2.66	113836311	113837361	15.259	207	113835253	113837701	74.5694	1304
chr2	113914124	113916097	.	1000	.	-1	323.331	-1	1103	5	5	113914124	113915906	142.715	423	113914159	113916097	323.331	1068
chr2	113955968	113957602	.	1000	.	-1	255.746	-1	697	5	5	113956043	113957270	111.536	614	113955968	113957602	255.746	706
chr2	113992439	113994298	.	1000	.	-1	173.202	-1	1010	4.65	5	113992615	113994140	43.4871	721	113992439	113994298	173.202	1124
chr2	114195221	114197398	.	1000	.	-1	121.086	-1	340	2.94	4.08	114195349	114196773	24.6474	216	114195221	114197398	121.086	331
chr2	114341112	114342674	.	1000	.	-1	441.073	-1	758	5	5	114341167	114342337	185.126	675	114341112	114342674	441.073	787
chr2	114360566	114362052	.	1000	.	-1	301.171	-1	1023	5	5	114360677	114361815	126.529	289	114360566	114362052	301.171	1028
chr2	114384066	114385649	.	1000	.	-1	128.794	-1	930	3.78	4.88	114384212	114385396	34.8555	222	114384066	114385649	128.794	905
chr2	114413657	114414500	.	1000	.	-1	135.118	-1	310	3.93	5	114413784	114414204	36.3352	173	114413657	114414500	135.118	321
chr2	114513232	114515241	.	1000	.	-1	299.567	-1	788	5	5	114513558	114515062	93.8017	464	114513232	114515241	299.567	787
chr2	114646756	114649093	.	1000	.	-1	249.414	-1	1170	5	5	114646839	114648693	84.3294	299	114646756	114649093	249.414	1315
chr2	118572122	118573148	.	1000	.	-1	135.484	-1	370	4.86	5	118572253	118572833	62.7232	222	118572122	118573148	135.484	387
chr2	118770801	118772144	.	1000	.	-1	134.407	-1	683	4.12	5	118771008	118771723	39.6025	486	118770801	118772144	134.407	673
chr2	118845109	118846836	.	1000	.	-1	112.057	-1	524	3.23	4.36	118845387	118846453	28.6443	213	118845109	118846836	112.057	513
chr2	119980887	119982041	.	1000	.	-1	58.5903	-1	693	2.25	3.43	119980949	119982010	28.0917	627	119980887	119982041	58.5903	697
chr2	120123649	120125745	.	1000	.	-1	198.585	-1	815	5	5	120123653	120125526	59.9155	343	120123649	120125745	198.585	524
chr2	120436287	120437538	.	1000	.	-1	110.011	-1	622	3.82	4.91	120436287	120437172	40.0857	186	120436291	120437538	110.011	604
chr2	120516605	120518764	.	1000	.	-1	321.479	-1	1115	5	5	120516682	120518368	94.3957	1031	120516605	120518764	321.479	1123
chr2	120770019	120772281	.	1000	.	-1	357.34	-1	849	5	5	120770279	120772281	124.935	396	120770019	120772189	357.34	832
chr2	120823333	120826915	.	1000	.	-1	131.086	-1	1077	4.48	5	120824028	120826779	49.9493	454	120823333	120826915	131.086	1035
chr2	120980006	120981925	.	1000	.	-1	416.643	-1	852	5	5	120980231	120981720	182.631	636	120980006	120981925	416.643	844
chr2	121009730	121011441	.	1000	.	-1	302.38	-1	922	5	5	121009730	121011348	101.731	319	121009761	121011441	302.38	886
chr2	121049195	121050323	.	1000	.	-1	56.7283	-1	393	1.81	2.99	121049252	121050039	18.363	202	121049195	121050323	56.7283	527
chr2	121101887	121106201	.	1000	.	-1	81.5674	-1	1656	2.75	3.91	121102531	121106057	25.6955	223	121101887	121106201	81.5674	888
chr2	121199483	121201138	.	935	.	-1	40.7255	-1	872	1.06	2.25	121200097	121200601	13.5356	373	121199483	121201138	40.7255	758
chr2	122287020	122289737	.	1000	.	-1	427.631	-1	1309	5	5	122287366	122289560	215.342	950	122287020	122289737	427.631	1322
chr2	122405988	122408597	.	1000	.	-1	323.991	-1	1476	5	5	122406120	122408482	113.701	1356	122405988	122408597	323.991	1465
chr2	122493535	122495211	.	1000	.	-1	203.16	-1	729	5	5	122493814	122495167	74.0984	314	122493535	122495211	203.16	710
chr2	122512531	122514755	.	1000	.	-1	263.399	-1	864	5	5	122512682	122514113	100.96	151	122512531	122514755	263.399	882
chr2	128051101	128052570	.	1000	.	-1	177.292	-1	478	5	5	128051183	128052322	57.1566	401	128051101	128052570	177.292	473
chr2	128144464	128146345	.	1000	.	-1	563.657	-1	882	5	5	128144656	128146149	246.024	218	128144464	128146345	563.657	858
chr2	128165131	128166866	.	1000	.	-1	175.489	-1	901	5	5	128165240	128166538	93.7612	210	128165131	128166866	175.489	903
chr2	128282832	128285451	.	1000	.	-1	369.369	-1	1052	5	5	128283176	128284999	113.009	712	128282832	128285451	369.369	1048
chr2	128457787	128460533	.	1000	.	-1	378.226	-1	1420	5	5	128458313	128460213	225.338	903	128457787	128460533	378.226	1412
chr2	128567680	128569399	.	1000	.	-1	290.331	-1	883	5	5	128567968	128569370	129.935	610	128567680	128569399	290.331	868
chr2	128614638	128616525	.	1000	.	-1	301.758	-1	909	5	5	128615051	128616355	94.5008	369	128614638	128616525	301.758	878
chr2	128642180	128645048	.	1000	.	-1	364.305	-1	1193	5	5	128642554	128644824	139.084	838	128642180	128645048	364.305	1175
chr2	128784104	128786525	.	1000	.	-1	421.032	-1	1342	5	5	128784415	128786358	122.818	259	128784104	128786525	421.032	1325
chr2	128847739	128849625	.	1000	.	-1	121.901	-1	1218	4.06	5	128847949	128849451	41.7632	996	128847739	128849625	121.901	1231
chr2	128990469	128991287	.	1000	.	-1	50.0029	-1	568	1.8	2.99	128990694	128991227	22.3593	296	128990469	128991287	50.0029	616
chr2	129048409	129051156	.	1000	.	-1	56.0208	-1	895	1.28	2.47	129048637	129050254	14.1034	202	129048409	129051156	56.0208	1272
chr2	129061784	129065675	.	1000	.	-1	190.496	-1	1660	5	5	129062113	129064870	70.2183	713	129061784	129065675	190.496	1729
chr2	129074222	129076883	.	1000	.	-1	94.5414	-1	1186	2.78	3.94	129074673	129076146	24.5704	862	129074222	129076883	94.5414	1059
chr2	129079444	129080305	.	1000	.	-1	82.5452	-1	288	3.28	4.4	129079611	129080174	45.2006	136	129079444	129080305	82.5452	274
chr2	130634577	130635204	.	1000	.	-1	39.5282	-1	448	1.23	2.43	130634872	130635176	24.5704	171	130634577	130635204	39.5282	430
chr2	130714241	130717686	.	1000	.	-1	176.183	-1	1820	4.59	5	130715158	130717054	41.9976	216	130714241	130717686	176.183	1820
chr2	130736968	130738923	.	1000	.	-1	170.065	-1	515	5	5	130737154	130738196	52.3431	189	130736968	130738923	170.065	498
chr2	130938102	130941423	.	1000	.	-1	383.573	-1	1937	5	5	130938251	130940995	141.062	1767	130938102	130941423	383.573	1959
chr2	130986228	130987671	.	1000	.	-1	148.391	-1	866	4.1	5	130986445	130987431	37.1886	636	130986228	130987671	148.391	879
chr2	131046042	131046941	.	1000	.	-1	65.9352	-1	244	2.28	3.45	131046101	131046736	22.671	164	131046042	131046941	65.9352	265
chr2	131098848	131101595	.	1000	.	-1	231.526	-1	1449	5	5	131099245	131101313	51.1783	528	131098848	131101595	231.526	1127
chr2	131112860	131114523	.	1000	.	-1	195.523	-1	994	5	5	131113036	131114338	61.1951	794	131112860	131114523	195.523	1019
chr2	131128806	131131050	.	1000	.	-1	359.131	-1	1091	5	5	131129036	131130874	145.948	887	131128806	131131050	359.131	1066
chr2	131148844	131149942	.	1000	.	-1	142.907	-1	341	4.04	5	131148951	131149652	36.5957	253	131148844	131149942	142.907	323
[truncated: 12,627 more rows]

## Sheet: Coetzee_H3k27ac_peaks_annot
count	14716
average length	2389.51
mean length	1944
#seqnames	start	end	width	strand	id	annotation	geneChr	geneStart	geneEnd	geneLength	geneStrand	geneId	transcriptId	distanceToTSS	length
chr1	12948	13935	988	*	38.2257	3' UTR	1	11874	14409	2536	1	100287102	uc010nxr.1	1074	987
chr1	28503	29889	1387	*	444.481	Promoter	1	14362	29370	15009	2	653635	uc001aac.4	0	1386
chr1	441017	443376	2360	*	83.6747	Distal Intergenic	1	367659	368597	939	1	729759	uc010nxu.2	73358	2359
chr1	458111	461856	3746	*	182.765	Distal Intergenic	1	367659	368597	939	1	729759	uc010nxu.2	90452	3745
chr1	521512	525048	3537	*	178.798	Distal Intergenic	1	621096	622034	939	2	729759	uc010nxv.2	96986	3536
chr1	539715	541860	2146	*	71.2061	Distal Intergenic	1	621096	622034	939	2	729759	uc010nxv.2	80174	2145
chr1	713012	715995	2984	*	234.826	Promoter	1	700245	714068	13824	2	100288069	uc001abo.3	0	2983
chr1	761921	763603	1683	*	238.527	Promoter	1	762971	778984	16014	1	643837	uc031pjj.1	0	1682
chr1	839315	840695	1381	*	77.171	Distal Intergenic	1	852953	854817	1865	2	100130417	uc010nxy.1	14122	1380
chr1	858699	861491	2793	*	130.523	Promoter	1	860530	871276	10747	1	148398	uc001abv.1	0	2792
chr1	875718	878424	2707	*	43.1458	Promoter	1	876524	879961	3438	1	148398	uc031pkp.1	0	2706
chr1	893538	895023	1486	*	115.151	Promoter	1	879583	893918	14336	2	26155	uc001aby.4	0	1485
chr1	901225	903100	1876	*	353.453	Promoter	1	901877	910484	8608	1	84069	uc001acd.3	0	1875
chr1	910816	912817	2002	*	173.839	Promoter	1	910579	912021	1443	2	84808	uc001acg.2	0	2001
chr1	933731	937649	3919	*	385.474	Promoter	1	934342	935552	1211	2	57801	uc001aci.2	0	3918
chr1	948146	950683	2538	*	51.869	Promoter	1	948847	949919	1073	1	9636	uc001acj.4	0	2537
chr1	954936	957925	2990	*	374.032	Promoter	1	955503	991499	35997	1	375790	uc001ack.2	0	2989
chr1	959259	961002	1744	*	60.9456	Intron (uc001ack.2/375790, intron 2 of 35)	1	955503	991499	35997	1	375790	uc001ack.2	3756	1743
chr1	994367	995534	1168	*	88.4987	Exon (uc009vjs.1/uc009vjs.1, exon 1 of 5)	1	1007126	1009687	2562	2	401934	uc021oen.1	14153	1167
chr1	999084	1000365	1282	*	50.5999	Intron (uc001acl.1/uc001acl.1, intron 3 of 3)	1	1007126	1009687	2562	2	401934	uc021oen.1	9322	1281
chr1	1002531	1006788	4258	*	130.826	Downstream (<1kb)	1	1007126	1009687	2562	2	401934	uc021oen.1	2899	4257
chr1	1007022	1011051	4030	*	236.649	Promoter	1	1007126	1009687	2562	2	401934	uc021oen.1	0	4029
chr1	1013260	1016955	3696	*	303.067	Downstream (<1kb)	1	1007126	1009687	2562	2	401934	uc021oen.1	-3573	3695
chr1	1049869	1052457	2589	*	236.776	Promoter	1	1017198	1051736	34539	2	54991	uc001acr.2	0	2588
chr1	1092874	1094485	1612	*	360.7	Distal Intergenic	1	1102484	1102578	95	1	406984	uc001acw.2	-7999	1611
chr1	1097344	1101714	4371	*	321.479	Distal Intergenic	1	1102484	1102578	95	1	406984	uc001acw.2	-770	4370
chr1	1165876	1167571	1696	*	359.395	Promoter	1	1152288	1167447	15160	2	51150	uc001adh.4	0	1695
chr1	1167661	1168507	847	*	57.0169	Promoter	1	1167629	1170420	2792	1	126792	uc001adk.3	32	846
chr1	1207306	1210089	2784	*	274.032	Promoter	1	1189292	1209234	19943	2	118424	uc001ado.3	0	2783
chr1	1242334	1246417	4084	*	260.924	Promoter	1	1227764	1243269	15506	2	116983	uc001aeb.2	0	4083
chr1	1259408	1261565	2158	*	277.618	Promoter	1	1246965	1260067	13103	2	54973	uc001aee.2	0	2157
chr1	1282698	1285545	2848	*	286.669	Promoter	1	1270658	1284492	13835	2	1855	uc001aer.4	0	2847
chr1	1309307	1311734	2428	*	438.331	Promoter	1	1309110	1310246	1137	2	54998	uc001afb.1	0	2427
chr1	1333647	1336715	3069	*	368.334	Promoter	1	1334910	1337426	2517	1	148413	uc001afm.3	0	3068
chr1	1341379	1343802	2424	*	410.468	Promoter	1	1337276	1342693	5418	2	55052	uc001afo.4	0	2423
chr1	1367744	1369988	2245	*	193.837	Distal Intergenic	1	1370903	1378262	7360	1	64856	uc001afr.3	-915	2244
chr1	1405966	1408758	2793	*	99.8965	Promoter	1	1407164	1431582	24419	1	83858	uc001afv.3	0	2792
chr1	1446205	1449070	2866	*	349.456	Promoter	1	1447523	1470067	22545	1	55210	uc001afz.2	0	2865
chr1	1509210	1511527	2318	*	395.054	Promoter	1	1477053	1510262	33210	2	29101	uc001agd.3	0	2317
chr1	1534556	1535364	809	*	53.1453	3' UTR	1	1533388	1535476	2089	2	643988	uc021oes.1	112	808
chr1	1535550	1536123	574	*	32.5344	Promoter	1	1533388	1535476	2089	2	643988	uc021oes.1	-74	573
chr1	1548764	1552221	3458	*	533.156	Promoter	1	1550795	1554590	3796	1	142678	uc021oet.1	0	3457
chr1	1589266	1591790	2525	*	369.649	3' UTR	1	1577747	1580625	2879	2	984	uc010nyr.1	-8641	2524
chr1	1607063	1611266	4204	*	94.3389	Promoter	1	1601214	1608285	7072	2	728661	uc021oeu.1	0	4203
chr1	1622275	1625512	3238	*	481.946	Promoter	1	1590988	1624243	33256	2	728661	uc009vkl.2	0	3237
chr1	1654347	1656761	2415	*	223.997	Promoter	1	1634170	1655791	21622	2	728642	uc009vkr.3	0	2414
chr1	1669863	1672232	2370	*	104.039	5' UTR	1	1592939	1677438	84500	2	728661	uc001ahh.4	5206	2369
chr1	1675464	1679143	3680	*	480.574	Promoter	1	1592939	1677438	84500	2	728661	uc001ahh.4	0	3679
chr1	1689053	1691574	2522	*	155.894	Promoter	1	1682671	1690081	7411	2	65220	uc010nyv.2	0	2521
chr1	1694105	1696912	2808	*	87.1269	Promoter	1	1685549	1696885	11337	2	65220	uc009vkx.1	0	2807
chr1	1708203	1711518	3316	*	325.185	Promoter	1	1682671	1709909	27239	2	65220	uc001aic.3	0	3315
chr1	1789636	1791971	2336	*	102.719	Intron (uc001aif.3/2782, intron 1 of 11)	1	1716725	1822526	105802	2	2782	uc001aif.3	30555	2335
chr1	1820968	1823624	2657	*	207.398	Promoter	1	1716725	1822526	105802	2	2782	uc001aif.3	0	2656
chr1	1839759	1841491	1733	*	130.523	Distal Intergenic	1	1846266	1848733	2468	1	163688	uc001aih.1	-4775	1732
chr1	1980717	1983193	2477	*	301.237	Promoter	1	1981909	2116834	134926	1	5590	uc001aiq.3	0	2476
chr1	2120521	2122675	2155	*	197.211	3' UTR	1	2115899	2126214	10316	2	199990	uc001aiv.2	3539	2154
chr1	2125236	2127568	2333	*	193.598	Promoter	1	2115899	2126214	10316	2	199990	uc001aiv.2	0	2332
chr1	2158157	2159165	1009	*	314.091	Distal Intergenic	1	2160134	2241652	81519	1	6497	uc001aja.4	-969	1008
chr1	2160147	2162053	1907	*	41.4191	Promoter	1	2160134	2241652	81519	1	6497	uc001aja.4	13	1906
chr1	2245957	2247017	1061	*	125.87	Distal Intergenic	1	2281853	2284100	2248	2	100129534	uc001ajc.3	37083	1060
chr1	2321854	2324528	2675	*	236.764	Promoter	1	2323214	2336885	13672	1	11079	uc001aje.2	0	2674
chr1	2335350	2337398	2049	*	55.7194	3' UTR	1	2336241	2344010	7770	2	5192	uc001ajg.3	6612	2048
chr1	2342999	2346386	3388	*	387.386	Promoter	1	2336241	2344010	7770	2	5192	uc001ajg.3	0	3387
chr1	2456966	2458476	1511	*	130.523	Promoter	1	2439975	2458035	18061	2	55229	uc001ajm.1	0	1510
chr1	2475917	2479934	4018	*	330.151	Downstream (1-2kb)	1	2481359	2484284	2926	2	115110	uc001ajo.2	4350	4017
chr1	2516509	2519457	2949	*	270.44	Promoter	1	2517899	2522908	5010	1	127281	uc021oew.1	0	2948
chr1	2573377	2574815	1439	*	268.648	Intron (uc021oey.1/100287898, intron 6 of 6)	1	2522081	2564481	42401	2	79258	uc001ajy.2	-8896	1438
chr1	3369992	3372436	2445	*	312.249	Promoter	1	3371147	3397677	26531	1	27237	uc001akg.4	0	2444
chr1	3397998	3400175	2178	*	67.6343	Distal Intergenic	1	3388171	3397677	9507	1	27237	uc010nzh.2	9827	2177
chr1	3447047	3447972	926	*	89.3079	Promoter	1	3404506	3448012	43507	2	1953	uc001akk.3	40	925
chr1	3540709	3542507	1799	*	133.644	Promoter	1	3541556	3546694	5139	1	127262	uc001akm.3	0	1798
chr1	3565951	3566695	745	*	81.5674	Promoter	1	3547331	3566671	19341	2	49856	uc001ako.3	0	744
chr1	3688548	3689785	1238	*	34.8282	Promoter	1	3689334	3692546	3213	1	388588	uc031pkx.1	0	1237
chr1	3712039	3713854	1816	*	133.636	Promoter	1	3696784	3713068	16285	2	57470	uc001akx.1	0	1815
chr1	3772876	3774711	1836	*	116.67	Promoter	1	3773845	3782564	8720	1	1677	uc009vln.1	0	1835
chr1	3815889	3818102	2214	*	212.517	Promoter	1	3816968	3832011	15044	1	100133612	uc001alg.3	0	2213
chr1	6051404	6053498	2095	*	314.091	Promoter	1	5922870	6052533	129664	2	261734	uc001alq.2	0	2094
chr1	6118274	6120667	2394	*	63.6002	Intron (uc009vlv.2/8514, intron 3 of 15)	1	6105981	6161253	55273	1	8514	uc009vlw.2	12293	2393
chr1	6217170	6217982	813	*	40.7255	Intron (uc001amb.2/26038, intron 3 of 41)	1	6181165	6206931	25767	2	26038	uc001amc.1	-10239	812
chr1	6218177	6218742	566	*	37.1569	Intron (uc001amb.2/26038, intron 3 of 41)	1	6181165	6206931	25767	2	26038	uc001amc.1	-11246	565
chr1	6258450	6260526	2077	*	334.483	Promoter	1	6245080	6259679	14600	2	6146	uc001amd.3	0	2076
chr1	6264603	6266835	2233	*	126.727	Promoter	1	6266189	6268366	2178	1	388591	uc001amf.1	0	2232
chr1	6294598	6296794	2197	*	147.869	Promoter	1	6281253	6296044	14792	2	23463	uc001amk.3	0	2196
chr1	6445062	6446911	1850	*	49.3383	Promoter	1	6324332	6445883	121552	2	11332	uc001ams.3	0	1849
chr1	6452784	6454591	1808	*	210.815	Promoter	1	6324332	6453826	129495	2	11332	uc001amt.3	0	1807
chr1	6484798	6485829	1032	*	34.8282	Promoter	1	6484848	6521004	36157	1	83715	uc001amy.3	0	1031
chr1	6489849	6492350	2502	*	95.7959	Promoter	1	6489894	6489956	63	2	100422975	uc021ofo.1	0	2501
chr1	6550066	6551224	1159	*	44.19	Promoter	1	6526152	6550654	24503	2	57449	uc001anl.2	0	1158
chr1	6613635	6615067	1433	*	205.963	Promoter	1	6581407	6614658	33252	2	79707	uc001ans.3	0	1432
chr1	6639688	6641269	1582	*	103.151	Promoter	1	6640056	6649340	9285	1	3104	uc009vmc.2	0	1581
chr1	6661252	6663461	2210	*	78.6407	Promoter	1	6650779	6662929	12151	2	9903	uc001anz.1	0	2209
chr1	6671949	6676075	4127	*	303.067	Promoter	1	6673756	6684093	10338	1	148479	uc001aob.4	0	4126
chr1	6684665	6686296	1632	*	98.7241	Promoter	1	6684925	6693642	8718	1	90326	uc001aoc.3	0	1631
chr1	6760880	6762377	1498	*	221.131	Promoter	1	6694228	6761966	67739	2	55735	uc001aof.2	0	1497
chr1	6843719	6845217	1499	*	209.105	Distal Intergenic	1	6845384	6932107	86724	1	23261	uc001aoh.3	-167	1498
chr1	7324896	7327099	2204	*	34.8282	Intron (uc001aoi.3/23261, intron 5 of 22)	1	7732054	7805082	73029	1	23261	uc010nzv.1	-404955	2203
chr1	7608572	7610859	2288	*	84.2772	Intron (uc001aoi.3/23261, intron 6 of 22)	1	7732054	7805082	73029	1	23261	uc010nzv.1	-121195	2287
chr1	7830763	7832122	1360	*	119.721	Promoter	1	7831329	7841492	10164	1	9341	uc001aol.3	0	1359
chr1	7842998	7845178	2181	*	195.523	Promoter	1	7844380	7864018	19639	1	8863	uc001aon.3	0	2180
chr1	8013568	8014863	1296	*	144.683	Distal Intergenic	1	8021714	8045342	23629	1	11315	uc001aou.4	-6851	1295
chr1	8020636	8022942	2307	*	265.057	Promoter	1	8021714	8045342	23629	1	11315	uc001aou.4	0	2306
chr1	8085155	8087074	1920	*	163.599	Promoter	1	8071779	8086393	14615	2	54206	uc001aoz.3	0	1919
chr1	8129821	8131531	1711	*	157.51	Distal Intergenic	1	8071779	8086393	14615	2	54206	uc001aoz.3	-43428	1710
chr1	8483130	8484910	1781	*	67.6343	Promoter	1	8412464	8483747	71284	2	473	uc001apd.3	0	1780
chr1	8761394	8764067	2674	*	293.936	Intron (uc001ape.3/473, intron 2 of 23)	1	8525030	8813897	288868	2	473	uc001aph.1	49830	2673
chr1	8876740	8878580	1841	*	221.131	Promoter	1	8412464	8877699	465236	2	473	uc001ape.3	0	1840
chr1	8931101	8941296	10196	*	389.839	Promoter	1	8938894	8939943	1050	1	100505975	uc021oft.1	0	10195
chr1	8962601	8965276	2676	*	94.6117	Distal Intergenic	1	8931006	8939151	8146	2	2023	uc009vmm.3	-23450	2675
chr1	9186959	9190120	3162	*	168.907	Promoter	1	9164476	9189229	24754	2	80045	uc001apq.1	0	3161
chr1	9240926	9243493	2568	*	234.642	5' UTR	1	9211727	9211836	110	2	407040	uc021ofw.1	-29090	2567
chr1	9294311	9295911	1601	*	82.8601	Promoter	1	9294863	9331394	36532	1	9563	uc001apt.3	0	1600
chr1	9352246	9354512	2267	*	136.78	Promoter	1	9352941	9429590	76650	1	80176	uc010oae.2	0	2266
chr1	9359328	9361616	2289	*	45.5991	Intron (uc010oae.2/80176, intron 1 of 2)	1	9352941	9429590	76650	1	80176	uc010oae.2	6387	2288
chr1	9404488	9406223	1736	*	51.869	Intron (uc010oae.2/80176, intron 1 of 2)	1	9415766	9429590	13825	1	80176	uc001apv.3	-9543	1735
chr1	9488396	9489894	1499	*	57.7394	Distal Intergenic	1	9415766	9429590	13825	1	80176	uc001apv.3	72630	1498
chr1	9599506	9600501	996	*	138.353	Promoter	1	9599528	9642831	43304	1	84275	uc001apw.3	0	995
chr1	9648848	9650054	1207	*	54.4289	Promoter	1	9648932	9665020	16089	1	199953	uc001apy.3	0	1206
chr1	9882630	9884100	1471	*	116.67	5' UTR	1	9789079	9884550	95472	2	22883	uc001aqh.3	450	1470
chr1	9884215	9886300	2086	*	78.6407	Promoter	1	9789079	9884550	95472	2	22883	uc001aqh.3	0	2085
chr1	9902718	9904326	1609	*	54.4289	Distal Intergenic	1	9789079	9884550	95472	2	22883	uc010oag.2	-18168	1608
chr1	9969192	9970397	1206	*	112.125	Promoter	1	9908334	9970316	61983	2	56998	uc001aqk.1	0	1205
chr1	9970634	9971655	1022	*	103.151	Distal Intergenic	1	9908334	9970316	61983	2	56998	uc001aql.1	-318	1021
chr1	10002465	10004295	1831	*	164.003	Promoter	1	10003486	10045556	42071	1	64802	uc001aqp.3	0	1830
chr1	10009751	10012622	2872	*	103.151	Intron (uc001aqp.3/64802, intron 1 of 4)	1	10003486	10045556	42071	1	64802	uc001aqp.3	6265	2871
chr1	10092036	10096163	4128	*	199.85	Promoter	1	10093041	10241296	148256	1	10277	uc001aqr.4	0	4127
chr1	10269711	10272135	2425	*	103.145	Promoter	1	10270764	10334469	63706	1	23095	uc009vmt.3	0	2424
chr1	10458355	10460232	1878	*	328.899	Promoter	1	10459085	10480201	21117	1	5226	uc001arc.3	0	1877
chr1	10490102	10491558	1457	*	116.67	Promoter	1	10490159	10512060	21902	1	100526739	uc001arf.3	0	1456
chr1	10534380	10535968	1589	*	210.815	Promoter	1	10535003	10580067	45065	1	5195	uc001arl.3	0	1588
chr1	10567728	10574135	6408	*	268.648	Intron (uc001arl.3/5195, intron 2 of 2)	1	10588312	10690815	102504	1	5195	uc009vmw.3	-14177	6407
chr1	10595877	10599012	3136	*	55.7194	5' UTR	1	10588312	10690815	102504	1	5195	uc009vmw.3	7565	3135
chr1	10615825	10617180	1356	*	155.894	Intron (uc001arm.1/5195, intron 2 of 3)	1	10588312	10690815	102504	1	5195	uc009vmw.3	27513	1355
chr1	10752893	10754585	1693	*	57.0169	Promoter	1	10713041	10754507	41467	2	54897	uc009vmx.2	0	1692
chr1	10758517	10760093	1577	*	38.4412	Intron (uc001aro.4/54897, intron 3 of 20)	1	10713041	10754507	41467	2	54897	uc009vmx.2	-4010	1576
chr1	10838694	10840478	1785	*	40.7255	Intron (uc001aro.4/54897, intron 1 of 20)	1	10696666	10856733	160068	2	54897	uc001aro.4	16255	1784
chr1	10853216	10857155	3940	*	154.274	Promoter	1	10696666	10856733	160068	2	54897	uc001aro.4	0	3939
chr1	10864146	10865016	871	*	46.8377	Distal Intergenic	1	10707263	10856733	149471	2	54897	uc001arp.2	-7413	870
chr1	10895563	10896115	553	*	62.2742	Distal Intergenic	1	10707263	10856733	149471	2	54897	uc001arp.2	-38830	552
chr1	10959609	10962620	3012	*	180.458	Distal Intergenic	1	11006530	11024328	17799	2	148345	uc001arr.2	61708	3011
chr1	11071735	11073699	1965	*	408.517	Promoter	1	11072679	11085549	12871	1	23435	uc001art.3	0	1964
chr1	11118638	11120061	1424	*	159.128	Promoter	1	11114649	11120091	5443	2	6723	uc001arz.1	30	1423
chr1	11120190	11121262	1073	*	155.894	Promoter	1	11114649	11120091	5443	2	6723	uc001arz.1	-99	1072
chr1	11158935	11160715	1781	*	286.669	Promoter	1	11126676	11159938	33263	2	5394	uc001asa.3	0	1780
chr1	11321874	11323416	1543	*	147.846	Promoter	1	11166588	11322608	156021	2	2475	uc001asd.3	0	1542
chr1	11333106	11334565	1460	*	306.734	Promoter	1	11333255	11348491	15237	1	29914	uc001asg.3	0	1459
chr1	11538659	11539845	1187	*	343.827	Promoter	1	11539295	11541938	2644	1	57540	uc009vmz.1	0	1186
chr1	11740515	11741955	1441	*	88.5594	Promoter	1	11734537	11741495	6959	2	10459	uc001asp.3	0	1440
chr1	11795890	11797355	1466	*	98.7241	Promoter	1	11796142	11810828	14687	1	57085	uc001ast.3	0	1465
chr1	11862401	11864163	1763	*	75.8549	Promoter	1	11845787	11863440	17654	2	4524	uc001atb.1	0	1762
chr1	11864632	11867377	2746	*	261.501	Promoter	1	11866153	11876844	10692	1	1185	uc009vne.2	0	2745
chr1	11967703	11970770	3068	*	375.935	Distal Intergenic	1	11979645	11986485	6841	2	90231	uc001atk.3	15715	3067
chr1	11984677	11987132	2456	*	77.245	Promoter	1	11979645	11986485	6841	2	90231	uc001atk.3	0	2455
chr1	11994135	11995356	1222	*	77.245	Promoter	1	11994724	12035599	40876	1	5351	uc001atm.3	0	1221
chr1	12039804	12041516	1713	*	200.979	Promoter	1	12040238	12073572	33335	1	9927	uc001atn.4	0	1712
chr1	12079430	12080337	908	*	107.072	5' UTR	1	12079299	12092106	12808	1	60672	uc001ato.2	131	907
chr1	12289990	12291699	1710	*	193.837	Promoter	1	12290113	12572098	281986	1	55187	uc001atv.3	0	1709
chr1	14026035	14027276	1242	*	82.8601	Promoter	1	14026735	14151574	124840	1	7799	uc001avg.3	0	1241
chr1	14075095	14076835	1741	*	155.866	Promoter	1	14075856	14107358	31503	1	7799	uc021ogk.1	0	1740
chr1	15478978	15480931	1954	*	102.719	Promoter	1	15479028	15546974	67947	1	55092	uc001avw.4	0	1953
chr1	15735949	15737130	1182	*	66.2849	Promoter	1	15736391	15756839	20449	1	79180	uc001awh.2	0	1181
chr1	15850119	15854121	4003	*	243.793	Promoter	1	15853352	15893091	39740	1	23341	uc001awr.1	0	4002
chr1	15910900	15911808	909	*	34.8282	Promoter	1	15898194	15911605	13412	2	79814	uc001awv.2	0	908
chr1	15928767	15930649	1883	*	122.737	Distal Intergenic	1	15943953	15960796	16844	1	84301	uc001aww.3	-13304	1882
chr1	15942362	15946319	3958	*	385.474	Promoter	1	15943953	15960796	16844	1	84301	uc001aww.3	0	3957
chr1	16010072	16011677	1606	*	224.59	Promoter	1	16010827	16061264	50438	1	23207	uc010obo.2	0	1605
chr1	16158376	16163494	5119	*	537.644	Exon (uc001axj.2/729614, exon 2 of 2)	1	16174359	16266950	92592	1	23013	uc001axk.1	-10865	5118
chr1	16172934	16177467	4534	*	210.815	Promoter	1	16174359	16266950	92592	1	23013	uc001axk.1	0	4533
chr1	16212050	16214456	2407	*	160.423	Intron (uc001axk.1/23013, intron 3 of 14)	1	16200610	16266950	66341	1	23013	uc010obp.1	11440	2406
chr1	16301576	16303310	1735	*	110.619	Promoter	1	16268364	16302627	34264	2	7709	uc001axl.4	0	1734
chr1	16469726	16472488	2763	*	40.7255	Intron (uc001aya.2/1969, intron 3 of 16)	1	16450832	16482582	31751	2	1969	uc001aya.2	10094	2762
chr1	16480675	16482685	2011	*	68.9897	Promoter	1	16450832	16482582	31751	2	1969	uc001aya.2	0	2010
chr1	16493640	16494762	1123	*	173.829	Distal Intergenic	1	16462084	16482582	20499	2	1969	uc010oca.2	-11058	1122
chr1	16499412	16503851	4440	*	145.148	Distal Intergenic	1	16462084	16482582	20499	2	1969	uc010oca.2	-16830	4439
chr1	16532401	16533058	658	*	49.3383	Exon (uc009voo.2/128272, exon 2 of 11)	1	16524599	16533705	9107	2	128272	uc009voo.2	647	657
chr1	16533142	16534191	1050	*	159.128	Promoter	1	16524599	16533705	9107	2	128272	uc009voo.2	0	1049
chr1	16537723	16540109	2387	*	151.069	Promoter	1	16524599	16539104	14506	2	128272	uc001ayc.1	0	2386
chr1	16562361	16564598	2238	*	275.639	Promoter	1	16558182	16563659	5478	2	79363	uc001ayd.3	0	2237
chr1	16677692	16679706	2015	*	284.452	Promoter	1	16576559	16678948	102390	2	54455	uc001ayg.3	0	2014
chr1	16692809	16695056	2248	*	348.88	Promoter	1	16693525	16722607	29083	1	26099	uc010ocb.2	0	2247
chr1	16766458	16767979	1522	*	125.862	Promoter	1	16767167	16786584	19418	1	55707	uc001ayo.3	0	1521
chr1	16824920	16826686	1767	*	59.0124	Distal Intergenic	1	16793931	16819196	25266	2	114819	uc001ayt.2	-5724	1766
chr1	16934948	16935677	730	*	58.6331	5' UTR	1	16931913	16939752	7840	2	55672	uc001azb.1	4075	729
chr1	16938912	16940630	1719	*	373.479	Promoter	1	16888922	16940100	51179	2	55672	uc001ayw.4	0	1718
chr1	16970191	16972177	1987	*	315.091	Promoter	1	16972069	16974587	2519	1	11209	uc009vow.2	0	1986
chr1	16983073	16984415	1343	*	84.5341	Distal Intergenic	1	16973908	16976915	3008	1	11209	uc009vox.3	9165	1342
chr1	16991806	16994726	2921	*	551.602	Distal Intergenic	1	17007750	17007823	74	1	100500876	uc021ogy.1	-13024	2920
chr1	17033664	17035154	1491	*	158.665	Exon (uc001azn.1/284729, exon 2 of 11)	1	17017713	17046652	28940	2	284729	uc001azn.1	11498	1490
chr1	17042888	17044492	1605	*	52.0234	Intron (uc001azn.1/284729, intron 1 of 10)	1	17017713	17046652	28940	2	284729	uc001azn.1	2160	1604
chr1	17065915	17068334	2420	*	586.441	Promoter	1	17066768	17267729	200962	1	9696	uc009voy.1	0	2419
chr1	17076058	17077367	1310	*	83.208	Intron (uc009voy.1/9696, intron 1 of 8)	1	17081129	17086552	5424	2	11223	uc001azp.5	9185	1309
chr1	17221264	17224027	2764	*	531.023	Exon (uc021ohi.1/uc021ohi.1, exon 1 of 1)	1	17248445	17299474	51030	1	9696	uc001azt.2	-24418	2763
chr1	17230096	17232292	2197	*	479.894	Intron (uc009voy.1/9696, intron 1 of 8)	1	17248445	17299474	51030	1	9696	uc001azt.2	-16153	2196
chr1	17239909	17241802	1894	*	240.28	Intron (uc009voy.1/9696, intron 1 of 8)	1	17248445	17299474	51030	1	9696	uc001azt.2	-6643	1893
chr1	17337695	17338453	759	*	34.8282	Promoter	1	17312453	17338423	25971	2	23400	uc001baa.2	0	758
chr1	17379771	17381431	1661	*	97.2577	Promoter	1	17345225	17380665	35441	2	6390	uc001bae.3	0	1660
chr1	17732105	17734198	2094	*	67.6343	3' UTR	1	17733251	17765059	31809	2	55920	uc001bal.3	30861	2093
chr1	17735623	17740933	5311	*	121.252	Exon (uc001bal.3/55920, exon 8 of 12)	1	17733251	17765059	31809	2	55920	uc001bal.3	24126	5310
chr1	17763494	17769824	6331	*	364.545	Promoter	1	17733251	17765059	31809	2	55920	uc001bal.3	0	6330
chr1	17798914	17803816	4903	*	82.8601	Distal Intergenic	1	17733251	17766250	33000	2	55920	uc001bam.3	-32664	4902
chr1	17844796	17849679	4884	*	221.131	Promoter	1	17846827	17909697	62871	1	55160	uc031pli.1	0	4883
chr1	17849826	17857544	7719	*	107.619	Intron (uc031pli.1/55160, intron 1 of 1)	1	17846827	17909697	62871	1	55160	uc031pli.1	2999	7718
chr1	17863814	17868367	4554	*	275.83	Promoter	1	17866330	18016673	150344	1	55160	uc009vpe.1	0	4553
chr1	17885201	17889119	3919	*	67.6343	Intron (uc031pli.1/55160, intron 1 of 1)	1	17907048	18024370	117323	1	55160	uc001bao.3	-17929	3918
chr1	19228484	19231063	2580	*	245.553	Promoter	1	19197924	19229293	31370	2	8659	uc001bbb.3	0	2579
chr1	19336057	19338832	2776	*	93.077	Distal Intergenic	1	19230774	19282826	52053	2	126917	uc001bbd.2	-53231	2775
chr1	19535462	19537895	2434	*	182.12	Promoter	1	19401000	19536746	135747	2	23352	uc001bbi.3	0	2433
chr1	19577423	19579520	2098	*	442.321	Promoter	1	19542158	19578053	35896	2	23065	uc001bbo.4	0	2097
chr1	19637618	19639506	1889	*	193.837	Promoter	1	19638740	19655794	17055	1	54896	uc001bby.3	0	1888
chr1	19810585	19813434	2850	*	395.054	Promoter	1	19665267	19811201	145935	2	832	uc010ocz.2	0	2849
chr1	19921795	19924733	2939	*	308.57	Promoter	1	19923471	19984949	61479	1	100532736	uc009vpl.2	0	2938
chr1	20125580	20127206	1627	*	110.619	Promoter	1	20008706	20126410	117705	2	255104	uc001bcn.3	0	1626
chr1	20208745	20210034	1290	*	152.674	Promoter	1	20208888	20239437	30550	1	23252	uc001bcs.4	0	1289
chr1	20833985	20835082	1098	*	53.1453	Promoter	1	20825941	20834674	8734	2	79594	uc001bdi.4	0	1097
chr1	20959841	20960966	1126	*	74.4703	Promoter	1	20959948	20978004	18057	1	65018	uc001bdm.3	0	1125
chr1	20987098	20988957	1860	*	188.798	Promoter	1	20978260	20988037	9778	2	1650	uc001bdo.1	0	1859
chr1	21022971	21023988	1018	*	71.7184	Intron (uc009vpx.3/57576, intron 1 of 8)	1	20990507	21024981	34475	2	57576	uc009vpx.3	993	1017
chr1	21111976	21114704	2729	*	410.468	Promoter	1	21069171	21113124	43954	2	50809	uc001bdv.1	0	2728
chr1	21348067	21350063	1997	*	58.3212	Intron (uc009vpz.3/8672, intron 1 of 29)	1	21132785	21377487	244703	2	8672	uc009vpz.3	27424	1996
chr1	21502034	21503958	1925	*	80.0418	Promoter	1	21132785	21503381	370597	2	8672	uc001bee.3	0	1924
chr1	21576834	21580634	3801	*	146.274	Intron (uc001bej.2/1889, intron 6 of 16)	1	21543740	21606183	62444	2	1889	uc001bej.2	25549	3800
chr1	21649165	21654085	4921	*	78.6407	Intron (uc001bem.2/1889, intron 1 of 18)	1	21543740	21672034	128295	2	1889	uc001bem.2	17949	4920
chr1	21655272	21657569	2298	*	50.0462	Intron (uc001bem.2/1889, intron 1 of 18)	1	21543740	21672034	128295	2	1889	uc001bem.2	14465	2297
chr1	21660643	21668240	7598	*	75.3531	Intron (uc001bem.2/1889, intron 1 of 18)	1	21543740	21672034	128295	2	1889	uc001bem.2	3794	7597
chr1	21670650	21673038	2389	*	127.417	Promoter	1	21543740	21672034	128295	2	1889	uc001bem.2	0	2388
chr1	21765880	21767422	1543	*	98.7241	Promoter	1	21766583	21811393	44811	1	84224	uc001ber.4	0	1542
chr1	21960008	21962453	2446	*	52.33	Intron (uc001bew.3/5909, intron 2 of 24)	1	21943799	21949011	5213	2	5909	uc001bez.1	-10997	2445
chr1	22107707	22110623	2917	*	393.301	Promoter	1	22004792	22109688	104897	2	84196	uc001bfb.3	0	2916
chr1	22263940	22264441	502	*	46.8377	Distal Intergenic	1	22148737	22263750	115014	2	3339	uc009vqd.3	-190	501
chr1	22351530	22353022	1493	*	226.486	Promoter	1	22351707	22357715	6009	1	29092	uc001bfm.4	0	1492
chr1	22378653	22380526	1874	*	306.734	Promoter	1	22379120	22413359	34240	1	998	uc009vqg.1	0	1873
chr1	22622654	22624841	2188	*	49.3383	Distal Intergenic	1	22443798	22470385	26588	2	54361	uc010odt.2	-152269	2187
chr1	22777031	22779627	2597	*	241.54	Promoter	1	22778344	22857650	79307	1	9923	uc001bft.2	0	2596
chr1	23152024	23154370	2347	*	58.3212	Intron (uc009vqj.1/2048, intron 3 of 16)	1	23189652	23189719	68	2	100422914	uc021oic.1	35349	2346
chr1	23344957	23346999	2043	*	304.885	Promoter	1	23345941	23410184	64244	1	23028	uc001bgi.2	0	2042
chr1	23493930	23495394	1465	*	38.3396	5' UTR	1	23410516	23495517	85002	2	7798	uc001bgk.2	123	1464
chr1	23669398	23672274	2877	*	543.307	Promoter	1	23636276	23670853	34578	2	10236	uc001bgp.4	0	2876
chr1	23692643	23696692	4050	*	302.122	Promoter	1	23695464	23698330	2867	1	148898	uc001bgw.3	0	4049
chr1	23777670	23779634	1965	*	57.7394	5' UTR	1	23755056	23763170	8115	2	55616	uc001bgy.1	-14500	1964
chr1	23809908	23811299	1392	*	107.619	Promoter	1	23755056	23810677	55622	2	55616	uc010odz.1	0	1391
chr1	23856550	23857836	1287	*	125.87	Promoter	1	23832920	23857712	24793	2	1870	uc001bhe.2	0	1286
chr1	23880406	23890288	9883	*	372.114	Promoter	1	23884421	23886285	1865	2	3399	uc001bhh.4	0	9882
chr1	23910252	23914657	4406	*	98.3594	Intron (uc001bhi.3/259283, intron 1 of 6)	1	23907985	23967056	59072	1	259283	uc001bhi.3	2267	4405
chr1	23916655	23922463	5809	*	72.0812	Exon (uc001bhi.3/259283, exon 2 of 7)	1	23907985	23967056	59072	1	259283	uc001bhi.3	8670	5808
chr1	23976837	23978952	2116	*	55.7194	Distal Intergenic	1	23953226	23967056	13831	1	259283	uc001bhj.3	23611	2115
chr1	24017633	24019693	2061	*	148.141	Promoter	1	24018269	24022915	4647	1	6135	uc001bhk.3	0	2060
chr1	24069343	24071482	2140	*	198.902	Promoter	1	24069856	24088549	18694	1	6924	uc001bho.3	0	2139
chr1	24104068	24105881	1814	*	182.12	Promoter	1	24086872	24104787	17916	2	100506963	uc001bhp.2	0	1813
chr1	24117011	24118649	1639	*	68.9897	Promoter	1	24117646	24122029	4384	1	11313	uc001bht.3	0	1638
chr1	24125887	24128282	2396	*	121.851	Promoter	1	24122089	24126060	3972	2	2582	uc009vqo.1	0	2395
chr1	24151165	24152618	1454	*	163.599	Promoter	1	24128367	24151949	23583	2	3155	uc001bib.3	0	1453
chr1	24283808	24288316	4509	*	328.899	Promoter	1	24286301	24289949	3649	1	55629	uc001big.3	0	4508
chr1	24305771	24308127	2357	*	249.081	Promoter	1	24292937	24306953	14017	2	10772	uc001bij.2	0	2356
chr1	24344004	24347003	3000	*	112.125	Distal Intergenic	1	24295573	24306953	11381	2	10772	uc021ois.1	-37051	2999
chr1	24739586	24740661	1076	*	64.9371	Promoter	1	24683489	24740262	56774	2	90529	uc001bja.3	0	1075
chr1	24828522	24829946	1425	*	48.0842	Promoter	1	24822823	24828850	6028	2	100750325	uc021oiy.1	0	1424
chr1	24968328	24971006	2679	*	351.336	Promoter	1	24969594	24999772	30179	1	10250	uc001bjm.3	0	2678
chr1	25031093	25033045	1953	*	59.8366	Distal Intergenic	1	25071760	25170815	99056	1	25932	uc001bjo.2	-38715	1952
chr1	25069182	25073985	4804	*	277.631	Promoter	1	25071760	25170815	99056	1	25932	uc001bjo.2	0	4803
chr1	25558374	25560642	2269	*	279.421	Promoter	1	25548767	25559013	10247	2	25949	uc001bjt.1	0	2268
chr1	25565553	25567322	1770	*	104.636	Downstream (1-2kb)	1	25556800	25559013	2214	2	25949	uc001bjv.1	-6540	1769
chr1	25572752	25574797	2046	*	348.797	Promoter	1	25568740	25573985	5246	2	57035	uc001bjw.3	0	2045
chr1	25593414	25594919	1506	*	127.155	Intron (uc021ojj.1/57035, intron 1 of 5)	1	25598981	25633433	34453	1	6007	uc010oep.2	-4062	1505
chr1	25663507	25665864	2358	*	193.837	Promoter	1	25664789	25688852	24064	1	23585	uc001bke.3	0	2357
chr1	25756108	25758381	2274	*	128.968	Promoter	1	25757388	25785383	27996	1	55219	uc009vrt.2	0	2273
chr1	25869986	25871091	1106	*	95.7959	Promoter	1	25870076	25895377	25302	1	26119	uc001bkl.4	0	1105
chr1	25943308	25943935	628	*	53.1453	Promoter	1	25943959	26111258	167300	1	57134	uc001bkm.2	-24	627
chr1	26145935	26147801	1867	*	314.091	Promoter	1	26146397	26159433	13037	1	56181	uc001bkq.4	0	1866
chr1	26185165	26187049	1885	*	88.5594	Promoter	1	26160497	26185848	25352	2	79000	uc001bkw.1	0	1884
chr1	26231350	26233105	1756	*	116.898	Promoter	1	26232853	26232945	93	2	100500808	uc021ojn.1	0	1755
chr1	26323614	26324689	1076	*	87.1269	Promoter	1	26286258	26324648	38391	2	5051	uc001bld.4	0	1075
chr1	26436971	26439650	2680	*	368.334	Promoter	1	26437656	26452039	14384	1	149420	uc010oew.2	0	2679
chr1	26496049	26497262	1214	*	106.125	Promoter	1	26496388	26497364	977	1	51042	uc001bll.4	0	1213
chr1	26503538	26505048	1511	*	88.5594	Promoter	1	26503981	26511677	7697	1	10256	uc010oex.1	0	1510
chr1	26560553	26561686	1134	*	185.443	Promoter	1	26560693	26605298	44606	1	64793	uc001blr.3	0	1133
chr1	26605615	26607276	1662	*	124.327	Promoter	1	26606213	26608013	1801	1	83442	uc001blu.3	0	1661
chr1	26757935	26759532	1598	*	59.106	Promoter	1	26758773	26797795	39023	1	79947	uc001bmk.3	0	1597
chr1	26797418	26800691	3274	*	605.306	Promoter	1	26798902	26803133	4232	1	3151	uc001bmp.4	0	3273
chr1	26826393	26828929	2537	*	431.203	Distal Intergenic	1	26856249	26901520	45272	1	6195	uc001bmr.1	-27320	2536
chr1	26856205	26857019	815	*	109.117	Promoter	1	26856249	26901520	45272	1	6195	uc001bmr.1	0	814
chr1	26946003	26949409	3407	*	418.214	Distal Intergenic	1	26881033	26881084	52	1	100302190	uc021ojp.1	64970	3406
chr1	27018383	27025185	6803	*	487.688	Promoter	1	27022522	27102198	79677	1	8289	uc001bmt.1	0	6802
chr1	27112965	27115817	2853	*	515.033	Promoter	1	27114454	27124894	10441	1	55650	uc001bmz.3	0	2852
chr1	27150120	27153924	3805	*	109.117	Promoter	1	27153201	27182211	29011	1	84243	uc001bnb.3	0	3804
chr1	27188032	27193047	5016	*	229.798	Promoter	1	27189633	27190947	1315	1	2810	uc001bnc.1	0	5015
chr1	27215750	27217378	1629	*	286.669	Promoter	1	27205873	27216869	10997	2	54707	uc001bnd.1	0	1628
chr1	27226099	27227549	1451	*	70.3511	Promoter	1	27216979	27226956	9978	2	63906	uc009vsp.2	0	1450
chr1	27247561	27249208	1648	*	219.405	Promoter	1	27248213	27273362	25150	1	10726	uc001bng.2	0	1647
chr1	27285923	27287700	1778	*	377.439	Promoter	1	27276047	27286901	10855	2	126695	uc001bni.2	0	1777
chr1	27334121	27339445	5325	*	85.6994	Promoter	1	27331511	27339333	7823	2	115572	uc010ofj.2	0	5324
chr1	27463009	27473523	10515	*	132.429	Intron (uc001bnm.4/6548, intron 1 of 11)	1	27425300	27481621	56322	2	6548	uc001bnm.4	8098	10514
chr1	27479240	27482719	3480	*	212.528	Promoter	1	27425300	27481621	56322	2	6548	uc001bnm.4	0	3479
chr1	27561045	27561808	764	*	89.9969	Promoter	1	27561007	27635124	74118	1	23038	uc009vst.3	38	763
chr1	27648159	27649806	1648	*	238.514	Promoter	1	27648636	27662891	14256	1	84065	uc001bnr.4	0	1647
chr1	27667622	27670877	3256	*	130.523	Promoter	1	27668483	27680423	11941	1	84958	uc001bnv.2	0	3255
chr1	27675129	27676986	1858	*	284.857	3' UTR	1	27671364	27680423	9060	1	84958	uc009vsv.2	3765	1857
chr1	27691410	27694188	2779	*	209.105	Promoter	1	27681670	27693337	11668	2	9064	uc001bny.1	0	2778
chr1	27815498	27817635	2138	*	395.054	Promoter	1	27730734	27816678	85945	2	10163	uc001bof.2	0	2137
chr1	27853676	27855612	1937	*	132.546	Distal Intergenic	1	27730734	27816678	85945	2	10163	uc010ofl.2	-36998	1936
chr1	27865808	27870358	4551	*	60.95	Intron (uc009vsy.3/27245, intron 6 of 6)	1	27730734	27816678	85945	2	10163	uc010ofl.2	-49130	4550
chr1	27901142	27902789	1648	*	107.619	Intron (uc009vsy.3/27245, intron 1 of 6)	1	27860756	27930143	69388	2	27245	uc009vsy.3	27354	1647
chr1	27927883	27930953	3071	*	221.131	Promoter	1	27860756	27930143	69388	2	27245	uc009vsy.3	0	3070
chr1	27986189	27986968	780	*	51.869	Distal Intergenic	1	27992572	27998724	6153	2	2537	uc001bon.1	11756	779
chr1	28052339	28053416	1078	*	157.51	Promoter	1	28052490	28086275	33786	1	199870	uc009vtb.3	0	1077
chr1	28099657	28100466	810	*	73.731	Promoter	1	28099694	28150963	51270	1	23673	uc001bou.4	0	809
chr1	28156437	28158158	1722	*	172.192	Promoter	1	28157252	28178183	20932	1	5511	uc001bov.2	0	1721
chr1	28240361	28241769	1409	*	68.9897	Promoter	1	28218049	28241236	23188	2	6118	uc001bpe.1	0	1408
chr1	28285550	28287161	1612	*	109.11	Promoter	1	28286504	28294604	8101	1	55113	uc001bph.1	0	1611
chr1	28414093	28416104	2012	*	118.193	Promoter	1	28296855	28415148	118294	2	2140	uc001bpi.2	0	2011
chr1	28558931	28560233	1303	*	88.5535	Promoter	1	28526790	28559542	32753	2	22826	uc001bpn.3	0	1302
chr1	28561725	28563704	1980	*	319.149	Promoter	1	28562602	28564616	2015	1	93974	uc001bpp.3	0	1979
chr1	28572674	28575883	3210	*	107.619	Distal Intergenic	1	28562602	28564616	2015	1	93974	uc001bpr.3	10072	3209
chr1	28585844	28587559	1716	*	257.941	Promoter	1	28585963	28609002	23040	1	83667	uc001bps.3	0	1715
chr1	28639766	28641677	1912	*	39.5282	Distal Intergenic	1	28655513	28661861	6349	1	54797	uc021okc.1	-13836	1911
chr1	28654501	28656570	2070	*	190.03	Promoter	1	28655513	28661861	6349	1	54797	uc021okc.1	0	2069
chr1	28695590	28697806	2217	*	250.848	Promoter	1	28696093	28793725	97633	1	65979	uc001bpu.3	0	2216
chr1	28831520	28837794	6275	*	235.015	Promoter	1	28832455	28865708	33254	1	1104	uc001bqa.2	0	6274
chr1	28844187	28847495	3309	*	360.762	Promoter	1	28844745	28865708	20964	1	1104	uc001bqe.2	0	3308
chr1	28852010	28855264	3255	*	155.894	Intron (uc001bqa.2/1104, intron 4 of 12)	1	28844745	28865708	20964	1	1104	uc001bqg.2	7265	3254
chr1	28878823	28880901	2079	*	122.787	Promoter	1	28879529	28905057	25529	1	54952	uc001bqh.4	0	2078
chr1	28907152	28909085	1934	*	166.788	Promoter	1	28907432	28907565	134	2	692073	uc001bqt.2	0	1933
chr1	28968582	28970964	2383	*	199.323	Promoter	1	28929609	28969604	39996	2	6883	uc001bqx.3	0	2382
chr1	28973960	28976501	2542	*	322.167	Promoter	1	28975112	28975246	135	1	26824	uc009vtj.1	0	2541
chr1	28994057	28996812	2756	*	451.408	Promoter	1	28995240	29042115	46876	1	10691	uc001bqz.3	0	2755
chr1	29062555	29065047	2493	*	337.777	Promoter	1	29063133	29096287	33155	1	51441	uc021okf.1	0	2492
chr1	29101140	29102714	1575	*	133.644	Distal Intergenic	1	29138654	29190208	51555	1	4985	uc001brf.1	-35940	1574
chr1	29213219	29214357	1139	*	41.9315	Promoter	1	29213603	29446558	232956	1	2035	uc001brg.2	0	1138
chr1	29240940	29241772	833	*	38.3396	Promoter	1	29241088	29380164	139077	1	2035	uc009vtk.2	0	832
chr1	29506825	29509593	2769	*	565.699	Promoter	1	29474250	29508637	34388	2	6429	uc001bro.3	0	2768
chr1	29562978	29564321	1344	*	46.8377	Promoter	1	29563028	29653325	90298	1	10076	uc001bru.3	0	1343
chr1	30817819	30818425	607	*	54.4289	Distal Intergenic	1	31191619	31199593	7975	1	100129196	uc001bsb.1	-373194	606
chr1	30818681	30819557	877	*	54.4289	Distal Intergenic	1	31191619	31199593	7975	1	100129196	uc001bsb.1	-372062	876
chr1	30852548	30853429	882	*	37.1599	Distal Intergenic	1	31191619	31199593	7975	1	100129196	uc001bsb.1	-338190	881
chr1	31191469	31192330	862	*	200.595	Promoter	1	31191619	31199593	7975	1	100129196	uc001bsb.1	0	861
chr1	31295999	31297911	1913	*	119.721	Distal Intergenic	1	31342313	31351587	9275	2	9672	uc001bsd.2	53676	1912
chr1	31536480	31539267	2788	*	222.859	Promoter	1	31404353	31538564	134212	2	9698	uc001bsh.1	0	2787
chr1	31624203	31628828	4626	*	261.501	Distal Intergenic	1	31652592	31661034	8443	2	79570	uc010ogc.2	32206	4625
chr1	31642988	31647374	4387	*	100.094	Distal Intergenic	1	31652592	31661034	8443	2	79570	uc010ogc.2	13660	4386
chr1	31768879	31770743	1865	*	178.193	Promoter	1	31769842	31837780	67939	1	51538	uc001bsp.1	0	1864
chr1	31885558	31887127	1570	*	106.125	Promoter	1	31885963	31899166	13204	1	347735	uc009vtw.1	0	1569
chr1	31943775	31945794	2020	*	53.5091	Distal Intergenic	1	31971839	31973124	1286	1	149086	uc001bsw.2	-26045	2019
chr1	31947551	31951498	3948	*	247.316	Distal Intergenic	1	31971839	31973124	1286	1	149086	uc001bsw.2	-20341	3947
chr1	31974755	31979440	4686	*	190.475	Distal Intergenic	1	31971839	31974167	2329	1	149086	uc021okn.1	2916	4685
chr1	32109509	32111383	1875	*	175.479	Promoter	1	32095463	32110218	14756	2	553115	uc021okp.1	0	1874
chr1	32165152	32168348	3197	*	53.9598	5' UTR	1	32117848	32164207	46360	2	1307	uc001btj.1	-945	3196
chr1	32253720	32254962	1243	*	306.734	Downstream (1-2kb)	1	32260097	32264232	4136	2	90853	uc001btw.1	9270	1242
chr1	32402430	32406221	3792	*	190.475	Promoter	1	32372022	32403988	31967	2	8073	uc001bty.2	0	3791
chr1	32478420	32481771	3352	*	453.374	Promoter	1	32479295	32509482	30188	1	10657	uc001bua.2	0	3351
chr1	32527700	32529238	1539	*	40.6515	Distal Intergenic	1	32538503	32566163	27661	1	55116	uc010ogt.1	-9265	1538
chr1	32537773	32539401	1629	*	264.01	Promoter	1	32538503	32566163	27661	1	55116	uc010ogt.1	0	1628
chr1	32572823	32575094	2272	*	157.51	Promoter	1	32573644	32642168	68525	1	23633	uc001bug.3	0	2271
chr1	32644618	32646468	1851	*	190.475	Promoter	1	32645345	32663886	18542	1	200081	uc001bui.3	0	1850
chr1	32670429	32672145	1717	*	152.674	Promoter	1	32671236	32674288	3053	1	55721	uc001bum.2	0	1716
chr1	32687163	32689281	2119	*	106.125	Promoter	1	32680078	32687926	7849	2	56063	uc001buo.3	0	2118
chr1	32706025	32707496	1472	*	39.525	Promoter	1	32697261	32706265	9005	2	339483	uc001but.3	0	1471
chr1	32756932	32758926	1995	*	157.501	Promoter	1	32757708	32793590	35883	1	3065	uc010ohd.1	0	1994
chr1	32797352	32802261	4910	*	277.631	Promoter	1	32799430	32801840	2411	2	65108	uc001bvd.4	0	4909
chr1	32816364	32818188	1825	*	164.56	Distal Intergenic	1	32826871	32827844	974	2	100128071	uc021oku.1	9656	1824
chr1	32827158	32828163	1006	*	88.5535	Promoter	1	32826871	32827844	974	2	100128071	uc021oku.1	0	1005
chr1	32859346	32861321	1976	*	125.87	Promoter	1	32830705	32860062	29358	2	55108	uc001bvg.4	0	1975
chr1	32965357	32967107	1751	*	180.458	Intron (uc001bvk.3/653121, intron 4 of 9)	1	32930658	32953459	22802	1	728116	uc001bvl.4	34699	1750
chr1	33004394	33006014	1621	*	110.619	Promoter	1	33004772	33066226	61455	1	653121	uc001bvm.3	0	1620
chr1	33077317	33078465	1149	*	49.3383	Intron (uc001bvo.1/339487, intron 1 of 1)	1	33065773	33116185	50413	2	339487	uc001bvo.1	37720	1148
chr1	33115296	33117905	2610	*	364.545	Promoter	1	33065773	33116185	50413	2	339487	uc001bvo.1	0	2609
chr1	33181355	33182970	1616	*	34.8282	Distal Intergenic	1	33145507	33168361	22855	2	81493	uc010ohl.1	-12994	1615
chr1	33206390	33209466	3077	*	264.01	Promoter	1	33207512	33240571	33060	1	57648	uc001bvu.1	0	3076
chr1	33218654	33222007	3354	*	283.047	Promoter	1	33219687	33240571	20885	1	57648	uc010ohm.1	0	3353
chr1	33222107	33229545	7439	*	390.806	Intron (uc001bvu.1/57648, intron 1 of 6)	1	33231235	33240571	9337	1	57648	uc001bvv.2	-1690	7438
chr1	33281743	33284909	3167	*	391.199	Promoter	1	33283043	33324480	41438	1	64766	uc001bvz.4	0	3166
chr1	33366374	33367563	1190	*	82.9436	Promoter	1	33360196	33366953	6758	2	113452	uc001bwi.1	0	1189
chr1	33429288	33430896	1609	*	162.375	Promoter	1	33402050	33430286	28237	2	127544	uc001bwm.4	0	1608
chr1	33501772	33502604	833	*	139.93	Promoter	1	33473541	33502512	28972	2	204	uc001bwo.2	0	832
chr1	33592172	33593644	1473	*	118.193	Distal Intergenic	1	33547779	33585995	38217	1	113451	uc009vug.3	44393	1472
chr1	33684622	33687628	3007	*	94.3328	Distal Intergenic	1	33722174	33766320	44147	1	149076	uc001bxc.1	-34546	3006
chr1	33720584	33724563	3980	*	362.652	Promoter	1	33722174	33766320	44147	1	149076	uc001bxc.1	0	3979
chr1	33814195	33815435	1241	*	185.453	Promoter	1	33789224	33815499	26276	2	1912	uc001bxe.1	64	1240
chr1	33815564	33816721	1158	*	193.837	Promoter	1	33789224	33815499	26276	2	1912	uc001bxf.1	-65	1157
chr1	35324726	35325492	767	*	116.67	Promoter	1	35315963	35325338	9376	2	113444	uc021old.1	0	766
chr1	35331409	35332236	828	*	71.7184	3' UTR	1	35315963	35325417	9455	2	113444	uc001byb.3	-5992	827
chr1	35450241	35451364	1124	*	139.93	Promoter	1	35447127	35450948	3822	2	100506144	uc001bye.3	0	1123
chr1	35496259	35498158	1900	*	259.72	Promoter	1	35449368	35497291	47924	2	9204	uc001byf.1	0	1899
chr1	35544465	35545973	1509	*	147.869	Promoter	1	35544972	35566700	21729	1	79830	uc001byl.1	0	1508
chr1	35657225	35659921	2697	*	515.033	Promoter	1	35649201	35658743	9543	2	6421	uc001bys.3	0	2696
chr1	35733771	35735192	1422	*	420.154	Promoter	1	35734568	35887545	152978	1	9202	uc001byt.3	0	1421
chr1	35971816	35973025	1210	*	44.3684	Exon (uc001byx.3/79932, exon 3 of 21)	1	35904143	35936561	32419	2	79932	uc010ohv.1	-35255	1209
chr1	36022125	36024269	2145	*	496.994	Promoter	1	36023393	36032380	8988	1	23154	uc001bza.3	0	2144
chr1	36106320	36107941	1622	*	109.995	Promoter	1	36035413	36107445	72033	2	5690	uc001bzd.2	0	1621
chr1	36183724	36185117	1394	*	95.7959	Promoter	1	36179477	36184790	5314	2	127703	uc001bzh.1	0	1393
chr1	36234024	36235922	1899	*	112.125	Promoter	1	36197713	36235551	37839	2	63967	uc001bzi.3	0	1898
chr1	36273025	36275093	2069	*	54.4289	Promoter	1	36273828	36323490	49663	1	192670	uc001bzj.2	0	2068
chr1	36348699	36349672	974	*	106.125	Promoter	1	36348810	36389899	41090	1	26523	uc001bzl.3	0	973
chr1	36395628	36397701	2074	*	267.077	Promoter	1	36396319	36449010	52692	1	192669	uc001bzn.1	0	2073
chr1	36553901	36555665	1765	*	233.806	Promoter	1	36554453	36559533	5081	1	54936	uc001bzt.3	0	1764
chr1	36614454	36617578	3125	*	108.531	Promoter	1	36602170	36615115	12946	2	27095	uc001bzx.4	0	3124
chr1	36620753	36622963	2211	*	233.282	Promoter	1	36602170	36621654	19485	2	27095	uc031plx.1	0	2210
chr1	36688852	36691101	2250	*	197.211	Promoter	1	36690017	36770957	80941	1	9967	uc001cae.4	0	2249
chr1	36771071	36773196	2126	*	215.961	Promoter	1	36771994	36787379	15386	1	79729	uc010oia.1	0	2125
chr1	36839363	36841484	2122	*	116.508	Intron (uc001cak.1/83931, intron 1 of 11)	1	36805225	36851485	46261	2	83931	uc001cak.1	10001	2121
chr1	36850063	36853192	3130	*	248.381	Promoter	1	36805225	36851485	46261	2	83931	uc001cak.1	0	3129
chr1	36862740	36863901	1162	*	131.086	Promoter	1	36859031	36863493	4463	2	84967	uc001cao.1	0	1161
chr1	36915715	36916842	1128	*	162.375	Promoter	1	36883507	36916086	32580	2	127700	uc001caq.3	0	1127
chr1	36928914	36930715	1802	*	122.737	Promoter	1	36921362	36930040	8679	2	64960	uc001cas.2	0	1801
chr1	36951750	36953413	1664	*	48.0842	Distal Intergenic	1	36931644	36948915	17272	2	1441	uc001cax.2	-2835	1663
chr1	37936683	37938131	1449	*	79.167	Intron (uc021olm.1/728431, intron 1 of 2)	1	37920480	37940044	19565	2	728431	uc021olm.1	1913	1448
chr1	37939611	37946210	6600	*	362.652	Promoter	1	37920480	37940044	19565	2	728431	uc021olm.1	0	6599
chr1	37979194	37981083	1890	*	252.274	Promoter	1	37955561	37979867	24307	2	64769	uc001cbd.2	0	1889
chr1	38019185	38020506	1322	*	159.119	Promoter	1	38000050	38019945	19896	2	79753	uc001cbi.4	0	1321
chr1	38060856	38061674	819	*	87.1269	Promoter	1	38032413	38061586	29174	2	29889	uc001cbk.3	0	818
chr1	38155055	38156266	1212	*	70.0213	Promoter	1	38147242	38156175	8934	2	54955	uc001cbo.3	0	1211
chr1	38157061	38159010	1950	*	155.894	Promoter	1	38151945	38157888	5944	2	54955	uc001cbq.1	0	1949
chr1	38258879	38260852	1974	*	143.095	Promoter	1	38259774	38267278	7505	1	149175	uc001cbx.2	0	1973
chr1	38272715	38275069	2355	*	167.269	Promoter	1	38273473	38275126	1654	1	127687	uc001ccd.2	0	2354
chr1	38324602	38326387	1786	*	186.818	Promoter	1	38275239	38325292	50054	2	4520	uc001cce.1	0	1785
chr1	38396509	38397520	1012	*	73.0864	Promoter	1	38326369	38397421	71053	2	3633	uc001ccf.1	0	1011
chr1	38454721	38455772	1052	*	118.03	Promoter	1	38422652	38455761	33110	2	10946	uc001cci.3	0	1051
chr1	38477888	38479202	1315	*	219.405	Promoter	1	38478384	38490497	12114	1	51118	uc001ccn.4	0	1314
chr1	39324166	39326047	1882	*	152.674	Promoter	1	39303869	39325495	21627	2	64121	uc001ccq.3	0	1881
chr1	39338380	39339917	1538	*	65.3837	Promoter	1	39328162	39339050	10889	2	26292	uc001ccs.3	0	1537
chr1	39456162	39458136	1975	*	250.848	Promoter	1	39456916	39471737	14822	1	79647	uc001ccw.3	0	1974
chr1	39491154	39493058	1905	*	130.907	Promoter	1	39491967	39500308	8342	1	4725	uc001ccx.3	0	1904
chr1	39873797	39875474	1678	*	63.6048	Promoter	1	39875176	39882154	6979	1	643314	uc009vvt.1	0	1677
chr1	40040790	40042612	1823	*	198.902	Promoter	1	40026485	40042521	16037	2	8761	uc001cdl.2	0	1822
chr1	40105010	40105807	798	*	37.1599	Promoter	1	40089103	40105348	16246	2	26508	uc001cdp.3	0	797
chr1	40204060	40205238	1179	*	100.195	Promoter	1	40204517	40222441	17925	1	10450	uc001cds.2	0	1178
chr1	40348578	40349650	1073	*	99.7603	Promoter	1	40306706	40349177	42472	2	54802	uc001cek.3	0	1072
chr1	40504966	40507330	2365	*	252.605	Promoter	1	40506255	40525833	19579	1	10487	uc010ojd.1	0	2364
chr1	40572682	40574496	1815	*	85.0395	Distal Intergenic	1	40538382	40563142	24761	2	5538	uc010ojg.1	-9540	1814
chr1	40626520	40628059	1540	*	136.78	Promoter	1	40627041	40706593	79553	1	6018	uc001cfc.4	0	1539
chr1	40722464	40724860	2397	*	183.785	Promoter	1	40723722	40759856	36135	1	10269	uc001cfg.4	0	2396
chr1	40770863	40772624	1762	*	51.869	Exon (uc001cfh.1/1298, exon 20 of 32)	1	40766163	40782981	16819	2	1298	uc001cfh.1	10357	1761
chr1	40839313	40840193	881	*	101.98	Promoter	1	40839378	40882027	42650	1	64744	uc010ojh.2	0	880
chr1	40915201	40916350	1150	*	64.9417	Promoter	1	40915774	40929390	13617	1	65243	uc001cfl.2	0	1149
chr1	40942594	40943436	843	*	51.4741	Promoter	1	40943302	40962015	18714	1	339559	uc001cfo.3	0	842
chr1	40973950	40975030	1081	*	53.9598	Promoter	1	40974433	40982214	7782	1	64789	uc001cfp.3	0	1080
chr1	40996603	40997848	1246	*	35.1141	Promoter	1	40997233	41013841	16609	1	127396	uc001cft.2	0	1245
chr1	41156681	41158727	2047	*	557.495	Promoter	1	41154752	41157933	3182	2	100130557	uc010ojl.1	0	2046
chr1	41363638	41366493	2856	*	210.815	Distal Intergenic	1	41326728	41328018	1291	2	163732	uc001cgj.3	-35620	2855
chr1	41444815	41446474	1660	*	187.114	Promoter	1	41445007	41478235	33229	1	1503	uc001cgk.4	0	1659
chr1	41706951	41708764	1814	*	118.193	Promoter	1	41492871	41707815	214945	2	22955	uc001cgq.3	0	1813
chr1	41818358	41820623	2266	*	67.6343	Distal Intergenic	1	41492871	41707815	214945	2	22955	uc001cgt.3	-110543	2265
chr1	41826857	41829038	2182	*	172.192	Distal Intergenic	1	41492871	41707815	214945	2	22955	uc001cgt.3	-119042	2181
chr1	41831141	41832841	1701	*	135.688	Distal Intergenic	1	41944446	41949874	5429	2	1907	uc001cgu.3	117033	1700
chr1	41836371	41838689	2319	*	81.4428	Distal Intergenic	1	41944446	41949874	5429	2	1907	uc001cgu.3	111185	2318
chr1	41964584	41967078	2495	*	38.3396	Distal Intergenic	1	41944446	41950344	5899	2	1907	uc001cgx.3	-14240	2494
chr1	41980086	41981962	1877	*	55.7194	Intron (uc001cgy.3/59269, intron 3 of 4)	1	41944446	41950344	5899	2	1907	uc001cgx.3	-29742	1876
chr1	42324952	42329560	4609	*	111.968	Intron (uc001cgz.4/59269, intron 1 of 8)	1	41972036	42384496	412461	2	59269	uc001cgz.4	54936	4608
chr1	42383499	42384474	976	*	114.411	Promoter	1	41972036	42384496	412461	2	59269	uc001cgz.4	22	975
chr1	42500701	42502124	1424	*	91.4334	Promoter	1	42312860	42501596	188737	2	59269	uc001chb.2	0	1423
chr1	42800037	42802402	2366	*	277.631	Promoter	1	42642210	42800636	158427	2	22887	uc001che.3	0	2365
chr1	42921301	42923221	1921	*	379.835	Promoter	1	42922173	42926086	3914	1	79717	uc001chk.3	0	1920
chr1	43123341	43124957	1617	*	101.671	Promoter	1	43124048	43133568	9521	1	10465	uc009vwl.2	0	1616
chr1	43146702	43149713	3012	*	242.035	Promoter	1	43148066	43168020	19955	1	4904	uc001chs.3	0	3011
chr1	43232800	43233730	931	*	120.355	Promoter	1	43232916	43241413	8498	1	79078	uc001cia.4	0	930
chr1	43282135	43283262	1128	*	366.439	Promoter	1	43282776	43305384	22609	1	114625	uc010ojw.1	0	1127
chr1	43312186	43312769	584	*	100.195	Promoter	1	43312244	43318146	5903	1	51058	uc001cig.3	0	583
chr1	43389607	43390910	1304	*	75.2487	Downstream (<1kb)	1	43424720	43449029	24310	1	440584	uc001cil.3	-33810	1303
chr1	43396966	43398492	1527	*	57.0169	Intron (uc001cik.2/6513, intron 2 of 9)	1	43424720	43449029	24310	1	440584	uc001cil.3	-26228	1526
chr1	43422288	43425333	3046	*	167.269	Promoter	1	43424720	43449029	24310	1	440584	uc001cil.3	0	3045
chr1	43585380	43587984	2605	*	160.75	Exon (uc009vwn.1/uc009vwn.1, exon 1 of 3)	1	43613594	43622067	8474	1	440585	uc009vwo.3	-25610	2604
chr1	43637156	43638224	1069	*	88.677	Promoter	1	43629845	43637986	8142	2	10969	uc001cin.3	0	1068
chr1	43750468	43751731	1264	*	57.0169	Promoter	1	43747557	43751250	3694	2	149466	uc001cit.4	0	1263
chr1	43813986	43815769	1784	*	393.135	3' UTR	1	43824626	43828873	4248	1	991	uc001cix.3	-8857	1783
chr1	43823440	43825885	2446	*	197.669	Promoter	1	43824626	43828873	4248	1	991	uc001cix.3	0	2445
chr1	43831391	43834813	3423	*	299.409	Promoter	1	43829068	43833409	4342	2	64834	uc031pmf.1	0	3422
chr1	43854832	43856255	1424	*	113.636	Promoter	1	43849579	43855483	5905	2	112950	uc001cje.2	0	1423
chr1	43918801	43920799	1999	*	152.674	Promoter	1	43916674	43919176	2503	2	81888	uc001cjm.3	0	1998
chr1	43995919	44000261	4343	*	362.652	Promoter	1	43996547	44045736	49190	1	5792	uc001cjq.4	0	4342
chr1	44000428	44003962	3535	*	222.859	Promoter	1	44003869	44045736	41868	1	5792	uc001cjt.4	0	3534
chr1	44013503	44019360	5858	*	143.095	Exon (uc001cjq.4/5792, exon 4 of 8)	1	44003869	44045736	41868	1	5792	uc001cjt.4	9634	5857
chr1	44114305	44116976	2672	*	274.032	Promoter	1	44115797	44171189	55393	1	9682	uc001cjx.3	0	2671
chr1	44171988	44173930	1943	*	89.9969	Promoter	1	44165356	44173012	7657	2	100132774	uc001cjy.4	0	1942
chr1	44401125	44402808	1684	*	66.2849	Promoter	1	44401654	44402912	1259	1	9048	uc001ckw.3	0	1683
chr1	44411500	44413443	1944	*	461.235	Promoter	1	44412478	44433694	21217	1	9670	uc001ckx.3	0	1943
chr1	44439686	44441785	2100	*	308.57	Promoter	1	44440602	44443972	3371	1	533	uc001cld.3	0	2099
chr1	44444269	44444847	579	*	51.869	Promoter	1	44444874	44456843	11970	1	8704	uc001clg.3	-27	578
chr1	44445010	44446038	1029	*	160.75	Promoter	1	44445608	44456843	11236	1	8704	uc010okl.2	0	1028
chr1	44456233	44458349	2117	*	123.351	Promoter	1	44457280	44462198	4919	1	149473	uc001clj.3	0	2116
chr1	44495219	44497328	2110	*	188.798	Promoter	1	44457172	44497164	39993	2	6536	uc010okm.2	0	2109
chr1	44678560	44679598	1039	*	159.128	Promoter	1	44679125	44681197	2073	1	55929	uc010okq.1	0	1038
chr1	44820359	44821049	691	*	118.863	Promoter	1	44686742	44820939	134198	2	79033	uc001clt.3	0	690
chr1	45096944	45098615	1672	*	257.941	Promoter	1	45097704	45117395	19692	1	55182	uc010okz.2	0	1671
chr1	45139389	45140804	1416	*	188.914	Promoter	1	45140394	45191263	50870	1	339541	uc001cmf.2	0	1415
chr1	45195568	45197261	1694	*	276.659	Distal Intergenic	1	45205490	45233438	27949	1	11004	uc001cmg.4	-8229	1693
chr1	45204793	45206299	1507	*	77.2397	Promoter	1	45205490	45233438	27949	1	11004	uc001cmg.4	0	1506
chr1	45240304	45243225	2922	*	258.78	Promoter	1	45241537	45241610	74	1	26811	uc001cmj.1	0	2921
chr1	45264737	45266626	1890	*	195.523	Promoter	1	45266036	45271667	5632	1	1263	uc001cmn.3	0	1889
chr1	45271931	45274706	2776	*	95.7898	Promoter	1	45274154	45279171	5018	1	149478	uc010old.1	0	2775
chr1	45284633	45286611	1979	*	465.202	3' UTR	1	45274154	45279801	5648	1	149478	uc010ole.1	10479	1978
chr1	45451656	45452930	1275	*	43.1424	Promoter	1	45316194	45452394	136201	2	8891	uc001cmt.3	0	1274
chr1	45476068	45477693	1626	*	101.276	Promoter	1	45468220	45477027	8808	2	79654	uc009vxk.3	0	1625
chr1	45645123	45646746	1624	*	217.682	Intron (uc001cnd.2/57643, intron 1 of 13)	1	45482076	45672250	190175	2	57643	uc001cnd.2	25504	1623
chr1	45671598	45672960	1363	*	152.538	Promoter	1	45482076	45672250	190175	2	57643	uc001cnd.2	0	1362
chr1	45768735	45770632	1898	*	245.553	Promoter	1	45769582	45771291	1710	1	400752	uc010olk.2	0	1897
chr1	45792169	45795784	3616	*	82.8601	Promoter	1	45792545	45794346	1802	1	84842	uc001cne.3	0	3615
chr1	45804253	45806953	2701	*	340.084	Promoter	1	45805342	45809650	4309	1	114034	uc009vxq.3	0	2700
chr1	45875283	45878951	3669	*	193.837	Intron (uc009vxr.1/10420, intron 2 of 8)	1	45809555	45923543	113989	2	10420	uc009vxr.1	44592	3668
chr1	45955648	45956970	1323	*	130.907	Promoter	1	45809555	45956840	147286	2	10420	uc001cns.1	0	1322
chr1	45965114	45966471	1358	*	52.4543	Promoter	1	45959598	45965751	6154	2	126661	uc001cnu.3	0	1357
chr1	45985984	45988422	2439	*	240.28	Promoter	1	45976707	45987610	10904	2	5052	uc001coa.3	0	2438
chr1	46015701	46017576	1876	*	133.097	Promoter	1	46016455	46035723	19269	1	10327	uc001cod.3	0	1875
chr1	46049183	46051041	1859	*	245.553	Promoter	1	46049660	46079853	30194	1	4678	uc010olq.2	0	1858
chr1	46150997	46155045	4049	*	475.098	Promoter	1	46153847	46160108	6262	1	51249	uc001cor.1	0	4048
chr1	46215324	46217381	2058	*	228.059	Promoter	1	46159998	46216485	56488	2	3652	uc001cos.4	0	2057
chr1	46268150	46270134	1985	*	77.245	Promoter	1	46269285	46501796	232512	1	23139	uc001cov.3	0	1984
chr1	46595900	46600862	4963	*	441.599	Promoter	1	46505812	46598380	92569	2	8503	uc001cpb.4	0	4962
chr1	46600948	46602501	1554	*	44.3649	Intron (uc010olw.2/8503, intron 1 of 9)	1	46505812	46598708	92897	2	8503	uc001cpc.4	-2240	1553
chr1	46636203	46639465	3263	*	292.116	Intron (uc010olw.2/8503, intron 1 of 9)	1	46640749	46651634	10886	1	10103	uc001cpd.3	-1284	3262
chr1	46648007	46650456	2450	*	75.5912	Exon (uc001cpd.3/10103, exon 4 of 9)	1	46505812	46642160	136349	2	8503	uc010olw.2	-5847	2449
chr1	46662918	46664749	1832	*	109.117	Promoter	1	46654353	46663145	8793	2	55624	uc010olx.2	0	1831
chr1	46713300	46714178	879	*	43.1458	Promoter	1	46713367	46744145	30779	1	8438	uc001cpl.2	0	878
chr1	46767225	46770979	3755	*	364.545	Promoter	1	46744072	46769038	24967	2	10489	uc001cpn.3	0	3754
chr1	46804500	46807128	2629	*	290.284	Promoter	1	46805849	46830824	24976	1	387338	uc001cpr.2	0	2628
chr1	46859598	46860727	1130	*	147.869	Promoter	1	46859939	46879520	19582	1	2166	uc001cpu.2	0	1129
chr1	47069191	47070493	1303	*	124.327	Promoter	1	47023079	47069966	46888	2	8569	uc001cqb.4	0	1302
chr1	47082072	47082741	670	*	55.213	Promoter	1	47073387	47082563	9177	2	148932	uc001cqf.4	0	669
chr1	47133225	47134623	1399	*	147.869	Promoter	1	47100711	47134099	33389	2	64756	uc001cqh.4	0	1398
chr1	47184041	47185798	1758	*	183.524	Promoter	1	47124359	47184736	60378	2	9813	uc010omh.1	0	1757
chr1	47220557	47225934	5378	*	312.249	Distal Intergenic	1	47140831	47184736	43906	2	9813	uc001cqk.4	-35821	5377
chr1	47778508	47781190	2683	*	221.131	Promoter	1	47694868	47779819	84952	2	6491	uc001crb.1	0	2682
chr1	47798214	47800955	2742	*	224.59	Promoter	1	47799469	47824547	25079	1	51727	uc001crh.2	0	2741
chr1	47902464	47904096	1633	*	133.679	5' UTR	1	47901689	47906363	4675	1	2306	uc001crm.3	775	1632
chr1	51425044	51427075	2032	*	190.475	Promoter	1	50906935	51425525	518591	2	11124	uc009vyw.1	0	2031
chr1	51433470	51435849	2380	*	189.443	Promoter	1	51433608	51440309	6702	1	1031	uc001csf.3	0	2379
chr1	51701282	51703192	1911	*	253.659	Promoter	1	51701945	51739119	37175	1	26994	uc001csi.4	0	1910
chr1	51761838	51764379	2542	*	64.8372	Promoter	1	51752930	51763594	10665	2	22996	uc001csj.3	0	2541
chr1	51778776	51781713	2938	*	38.3336	Intron (uc001csk.3/22996, intron 2 of 17)	1	51752930	51787938	35009	2	22996	uc001csk.3	6225	2937
chr1	51786062	51798807	12746	*	377.839	Promoter	1	51752930	51787938	35009	2	22996	uc001csk.3	0	12745
chr1	51809577	51812037	2461	*	110.619	Promoter	1	51752930	51810785	57856	2	22996	uc010onf.2	0	2460
chr1	51983132	51985085	1954	*	141.511	Promoter	1	51819935	51984995	165061	2	2060	uc001csq.1	0	1953
chr1	52031833	52038291	6459	*	308.57	Distal Intergenic	1	52042851	52254891	212041	1	114883	uc001css.4	-4560	6458
chr1	52082724	52084065	1342	*	70.7478	5' UTR	1	52082546	52254891	172346	1	114883	uc009vza.3	178	1341
chr1	52194737	52196029	1293	*	104.039	Promoter	1	52195486	52254891	59406	1	114883	uc001csy.3	0	1292
chr1	52343392	52345674	2283	*	266.858	Promoter	1	52254866	52343712	88847	2	4898	uc001cte.3	0	2282
chr1	52498158	52499982	1825	*	198.891	Promoter	1	52497777	52499472	1696	2	112970	uc001ctj.1	0	1824
chr1	52520194	52523057	2864	*	298.25	Promoter	1	52485804	52521843	36040	2	51060	uc001cti.4	0	2863
chr1	52607290	52608764	1475	*	115.151	Promoter	1	52607766	52729719	121954	1	9372	uc001ctn.4	0	1474
chr1	52830431	52832410	1980	*	231.538	Promoter	1	52816265	52831877	15613	2	200014	uc001ctq.2	0	1979
chr1	52869186	52871138	1953	*	179.722	Promoter	1	52838501	52870143	31643	2	4998	uc001ctt.3	0	1952
chr1	53163030	53164814	1785	*	123.839	Promoter	1	53152014	53164038	12025	2	65260	uc001cui.2	0	1784
chr1	53168748	53169576	829	*	39.5282	Distal Intergenic	1	53152014	53164038	12025	2	65260	uc001cui.2	-4710	828
chr1	53191949	53192776	828	*	109.117	Promoter	1	53192131	53282312	90182	1	79699	uc009vzg.3	0	827
chr1	53308185	53310120	1936	*	96.9627	Promoter	1	53308183	53360247	52065	1	440590	uc001cul.2	2	1935
chr1	53386868	53387730	863	*	57.0169	Promoter	1	53361582	53387375	25794	2	55268	uc001cun.3	0	862
chr1	53662056	53663392	1337	*	236.764	Promoter	1	53662101	53679869	17769	1	1376	uc001cvb.4	0	1336
chr1	53685213	53687061	1849	*	296.031	Promoter	1	53679772	53686289	6518	2	54987	uc001cvd.3	0	1848
chr1	53703403	53704986	1584	*	78.5202	Promoter	1	53704282	53708455	4174	1	100507564	uc001cvg.3	0	1583
chr1	53791187	53793676	2490	*	113.636	Promoter	1	53708041	53793071	85031	2	7804	uc001cvh.2	0	2489
chr1	54302894	54304449	1556	*	445.518	Promoter	1	54231134	54304225	73092	2	55706	uc001cvs.3	0	1555
chr1	54354911	54355948	1038	*	54.1672	Promoter	1	54317392	54355487	38096	2	54432	uc001cvu.3	0	1037
chr1	54410731	54412707	1977	*	160.75	Promoter	1	54411999	54433841	21843	1	115353	uc001cwj.2	0	1976
chr1	54517559	54520026	2468	*	121.252	Promoter	1	54519752	54519827	76	1	100616315	uc021ons.1	0	2467
chr1	54665191	54666515	1325	*	110.619	Promoter	1	54665840	54684056	18217	1	51253	uc001cxa.4	0	1324
chr1	54870940	54874368	3429	*	187.124	Promoter	1	54691104	54872068	180965	2	23648	uc001cxe.4	0	3428
chr1	54953437	54955347	1911	*	118.863	Distal Intergenic	1	55007930	55076005	68076	1	26027	uc001cxj.2	-52583	1910
chr1	55181439	55182074	636	*	109.995	Promoter	1	55181495	55208328	26834	1	7268	uc001cxx.4	0	635
chr1	55229307	55230320	1014	*	136.772	Promoter	1	55222571	55230226	7656	2	25973	uc001cxy.3	0	1013
chr1	55351137	55354164	3028	*	152.665	Promoter	1	55315300	55352481	37182	2	1718	uc010ook.1	0	3027
chr1	55680318	55681724	1407	*	107.072	Promoter	1	55681081	55683128	2048	1	100507634	uc021onx.1	0	1406
chr1	57033931	57037474	3544	*	108.531	Intron (uc001cyj.2/8613, intron 1 of 5)	1	56960419	57045257	84839	2	8613	uc001cyj.2	7783	3543
chr1	57043447	57045574	2128	*	173.839	Promoter	1	56960419	57045257	84839	2	8613	uc001cyj.2	0	2127
chr1	59011347	59012915	1569	*	292.116	Promoter	1	58946391	59012446	66056	2	115209	uc001cyy.3	0	1568
chr1	59041153	59044222	3070	*	379.728	Promoter	1	59041095	59043166	2072	2	4070	uc001cyz.4	0	3069
chr1	59084844	59087338	2495	*	162.01	Distal Intergenic	1	59041095	59043166	2072	2	4070	uc001cyz.4	-41678	2494
chr1	59164858	59166188	1331	*	180.458	Promoter	1	59120411	59165747	45337	2	114803	uc009wab.2	0	1330
chr1	59247052	59251704	4653	*	343.827	Promoter	1	59250823	59365384	114562	1	100131060	uc001czf.2	0	4652
chr1	59279047	59282812	3766	*	301.237	Intron (uc001czf.2/100131060, intron 1 of 3)	1	59250823	59365384	114562	1	100131060	uc010oop.1	28224	3765
chr1	59369034	59370308	1275	*	180.458	Distal Intergenic	1	59250823	59365384	114562	1	100131060	uc010oop.1	118211	1274
chr1	59761586	59763709	2124	*	81.4483	Promoter	1	59762625	60092526	329902	1	55277	uc001czg.2	0	2123
chr1	59891671	59893813	2143	*	55.7153	Intron (uc001czg.2/55277, intron 4 of 8)	1	59981301	60228402	247102	1	55277	uc001czm.5	-87488	2142
chr1	60279682	60280285	604	*	33.6735	Distal Intergenic	1	60280463	60342050	61588	1	51361	uc009wad.3	-178	603
chr1	60280434	60281510	1077	*	206.716	Promoter	1	60280463	60342050	61588	1	51361	uc009wad.3	0	1076
chr1	61542181	61543646	1466	*	85.6994	Promoter	1	61542946	61928460	385515	1	4774	uc001czy.3	0	1465
chr1	61547383	61549405	2023	*	33.6764	Promoter	1	61547534	61928460	380927	1	4774	uc010oos.2	0	2022
chr1	62107568	62109365	1798	*	68.0983	Distal Intergenic	1	62119914	62121800	1887	1	414927	uc031pmt.1	-10549	1797
chr1	62190081	62191404	1324	*	138.353	Promoter	1	62146719	62191095	44377	2	83941	uc001czz.1	0	1323
chr1	62206926	62209888	2963	*	379.745	Promoter	1	62208149	62579918	371770	1	10207	uc009waf.1	0	2962
chr1	62900988	62904333	3346	*	475.098	Promoter	1	62901975	62917475	15501	1	7398	uc001daj.2	0	3345
chr1	63153050	63154624	1575	*	152.674	Promoter	1	62920397	63154039	233643	2	85440	uc001dan.4	0	1574
chr1	63248916	63250322	1407	*	168.907	Promoter	1	63249777	63330941	81165	1	84938	uc001dat.3	0	1406
chr1	63782495	63783495	1001	*	98.7241	Promoter	1	63624754	63782901	158148	2	199899	uc001daw.2	0	1000
chr1	63832704	63834045	1342	*	100.195	Promoter	1	63833261	63904233	70973	1	29929	uc021oof.1	0	1341
chr1	63988182	63989887	1706	*	185.453	Promoter	1	63906441	63988944	82504	2	23421	uc001dba.2	0	1705
chr1	64058900	64060397	1498	*	66.2849	Promoter	1	64058947	64125916	66970	1	5236	uc001dbh.3	0	1497
chr1	64809399	64810742	1344	*	88.5594	Distal Intergenic	1	64936476	65158741	222266	1	57685	uc001dbo.1	-125734	1343
chr1	64935477	64936619	1143	*	40.7255	Promoter	1	64936476	65158741	222266	1	57685	uc001dbo.1	0	1142
chr1	65210118	65211430	1313	*	59.6323	Promoter	1	65210778	65298914	88137	1	55225	uc001dbs.2	0	1312
chr1	65431262	65432816	1555	*	155.894	Promoter	1	65298906	65432187	133282	2	3716	uc001dbu.1	0	1554
chr1	65447965	65448890	926	*	32.5344	Intron (uc001dbw.3/uc001dbw.3, intron 5 of 5)	1	65298906	65432619	133714	2	3716	uc009wam.1	-15346	925
chr1	65467830	65468958	1129	*	85.6938	Exon (uc001dbw.3/uc001dbw.3, exon 1 of 6)	1	65298906	65432619	133714	2	3716	uc009wam.1	-35211	1128
chr1	65612844	65615103	2260	*	84.5757	Promoter	1	65613232	65697828	84597	1	205	uc001dby.3	0	2259
chr1	65886123	65887311	1189	*	185.453	Promoter	1	65886131	66096095	209965	1	3953	uc001dcg.3	0	1188
chr1	66648366	66650065	1700	*	60.95	Intron (uc001dcn.3/5142, intron 3 of 16)	1	66797793	66840262	42470	1	5142	uc001dcq.3	-147728	1699
chr1	66737103	66738786	1684	*	107.619	Intron (uc001dcn.3/5142, intron 7 of 16)	1	66797793	66840262	42470	1	5142	uc001dcq.3	-59007	1683
chr1	67389674	67391716	2043	*	275.847	Promoter	1	67390578	67413923	23346	1	57708	uc001dda.5	0	2042
chr1	67395502	67397173	1672	*	177.142	Promoter	1	67395926	67454302	58377	1	57708	uc001ddi.2	0	1671
chr1	67518266	67520476	2211	*	220.363	Promoter	1	67465015	67520080	55066	2	23169	uc001ddk.2	0	2210
chr1	67894824	67897334	2511	*	268.648	Promoter	1	67873493	67896123	22631	2	26135	uc001ddv.3	0	2510
chr1	68150842	68153056	2215	*	176.174	Promoter	1	68150860	68154021	3162	1	1647	uc001ddz.2	0	2214
chr1	68961845	68963386	1542	*	88.8784	Promoter	1	68939835	68962799	22965	2	55635	uc001del.4	0	1541
chr1	70670729	70672286	1558	*	77.9108	Promoter	1	70610485	70671361	60877	2	55631	uc001der.2	0	1557
chr1	70686268	70688159	1892	*	226.323	Promoter	1	70687145	70716186	29042	1	9295	uc001deu.2	0	1891
chr1	70819053	70821053	2001	*	221.057	Promoter	1	70820493	70833705	13213	1	11147	uc001dfa.3	0	2000
chr1	70875969	70877343	1375	*	64.9417	Promoter	1	70876901	70897918	21018	1	1491	uc009wbl.2	0	1374
chr1	71545838	71547334	1497	*	177.142	Promoter	1	71547007	71703406	156400	1	100852410	uc001dfu.2	0	1496
chr1	75198301	75199601	1301	*	107.619	Promoter	1	75198836	75232360	33525	1	127253	uc001dgn.3	0	1300
chr1	76189284	76190968	1685	*	182.12	Promoter	1	76190043	76205795	15753	1	34	uc010orc.1	0	1684
chr1	76250983	76252698	1716	*	103.151	Promoter	1	76251879	76260775	8897	1	5876	uc001dgy.2	0	1715
chr1	77684606	77685662	1057	*	51.2468	Promoter	1	77554667	77685132	130466	2	10026	uc001dhk.3	0	1056
chr1	78147140	78150085	2946	*	366.439	Promoter	1	78030190	78148343	118154	2	26009	uc001dhq.3	0	2945
chr1	78224456	78225725	1270	*	188.914	Promoter	1	78161674	78225564	63891	2	23032	uc001dht.4	0	1269
chr1	78244796	78245996	1201	*	54.7991	Promoter	1	78245309	78345225	99917	1	374986	uc001dhx.4	0	1200
chr1	78442978	78445906	2929	*	231.538	Promoter	1	78444934	78482995	38062	1	11080	uc010orn.2	0	2928
chr1	78469892	78471128	1237	*	55.7194	Promoter	1	78470636	78482995	12360	1	11080	uc001dij.3	0	1236
chr1	81058628	81060910	2283	*	94.3389	Distal Intergenic	1	81771845	82458107	686263	1	23266	uc001dis.3	-710935	2282
chr1	81099043	81100962	1920	*	45.5394	Distal Intergenic	1	81771845	82458107	686263	1	23266	uc001dis.3	-670883	1919
chr1	81472096	81474092	1997	*	57.0169	Distal Intergenic	1	81771845	82458107	686263	1	23266	uc001dis.3	-297753	1996
chr1	81474258	81475698	1441	*	44.3684	Distal Intergenic	1	81771845	82458107	686263	1	23266	uc001dis.3	-296147	1440
chr1	81630910	81635037	4128	*	55.7194	Distal Intergenic	1	81771845	82458107	686263	1	23266	uc001dis.3	-136808	4127
chr1	81644076	81645032	957	*	51.869	Distal Intergenic	1	81771845	82458107	686263	1	23266	uc001dis.3	-126813	956
chr1	83517159	83523040	5882	*	97.2577	Distal Intergenic	1	84259598	84379059	119462	2	100847084	uc031pmy.1	856019	5881
chr1	84764186	84765133	948	*	45.924	5' UTR	1	84764049	84816481	52433	1	148418	uc001djr.3	137	947
chr1	84944593	84945837	1245	*	130.523	Promoter	1	84944920	84964033	19114	1	80135	uc001djv.4	0	1244
chr1	84970674	84972951	2278	*	261.897	Promoter	1	84964006	84972262	8257	2	2787	uc001djw.4	0	2277
chr1	85038580	85040192	1613	*	130.523	Promoter	1	85018804	85040104	21301	2	1486	uc001dkc.3	0	1612
chr1	85086247	85086873	627	*	51.869	Distal Intergenic	1	85093913	85097429	3517	2	439927	uc010ory.1	10556	626
chr1	85155335	85157249	1915	*	229.798	Promoter	1	85109390	85156151	46762	2	117178	uc001dkg.3	0	1914
chr1	85600324	85602500	2177	*	51.116	Distal Intergenic	1	85599477	85599556	80	1	100616481	uc021opc.1	847	2176
chr1	85662322	85669549	7228	*	502.591	Promoter	1	85623356	85666728	43373	2	84144	uc009wcm.3	0	7227
chr1	85679044	85682904	3861	*	187.124	Distal Intergenic	1	85646846	85666728	19883	2	84144	uc001dku.4	-12316	3860
chr1	85688891	85692364	3474	*	79.3432	Distal Intergenic	1	85646846	85666728	19883	2	84144	uc001dku.4	-22163	3473
chr1	85694913	85696610	1698	*	53.1453	Distal Intergenic	1	85646846	85666728	19883	2	84144	uc001dku.4	-28185	1697
chr1	85724538	85725740	1203	*	182.12	Promoter	1	85715637	85725355	9719	2	148423	uc001dkv.3	0	1202
chr1	85741271	85743374	2104	*	243.793	Promoter	1	85742041	85743771	1731	1	646626	uc021ope.1	0	2103
chr1	85929482	85931781	2300	*	151.069	Promoter	1	85784168	85930267	146100	2	23576	uc009wco.3	0	2299
chr1	86107056	86108267	1212	*	62.2742	Distal Intergenic	1	86046444	86049648	3205	1	3491	uc001dle.3	60612	1211
chr1	86172875	86174980	2106	*	57.0169	Promoter	1	86115106	86174116	59011	2	54680	uc001dlh.3	0	2105
chr1	86861263	86862556	1294	*	40.7255	Promoter	1	86812507	86862025	49519	2	57489	uc001dlp.3	0	1293
chr1	87169993	87171416	1424	*	122.787	Promoter	1	87170253	87213867	43615	1	51100	uc001dlw.3	0	1423
chr1	87379230	87381156	1927	*	130.523	Promoter	1	87328128	87380107	51980	2	9403	uc021oph.1	0	1926
chr1	87793540	87795609	2070	*	154.283	Promoter	1	87794151	87814607	20457	1	8543	uc001dmi.3	0	2069
chr1	87796822	87797925	1104	*	97.2577	Promoter	1	87797351	87814607	17257	1	8543	uc001dmj.3	0	1103
chr1	87800367	87801440	1074	*	35.9894	Intron (uc001dmi.3/8543, intron 2 of 4)	1	87797351	87814607	17257	1	8543	uc001dmj.3	3016	1073
chr1	89148793	89151175	2383	*	165.634	Promoter	1	89149922	89301938	152017	1	5586	uc001dmn.3	0	2382
chr1	89356538	89357886	1349	*	67.6343	Promoter	1	89318321	89357301	38981	2	2959	uc001dmo.4	0	1348
chr1	89457154	89459509	2356	*	130.523	Promoter	1	89445139	89458643	13505	2	494115	uc001dms.3	0	2355
chr1	89989643	89991299	1657	*	149.407	Promoter	1	89990397	90063420	73024	1	23507	uc001dnh.3	0	1656
chr1	90286031	90287801	1771	*	100.195	Promoter	1	90286573	90401989	115417	1	55144	uc001dnm.3	0	1770
chr1	90308569	90309690	1122	*	35.9894	5' UTR	1	90287480	90401989	114510	1	55144	uc001dnn.3	21089	1121
chr1	90459973	90461533	1561	*	175.489	Promoter	1	90460678	90472000	11323	1	284695	uc001dnp.4	0	1560
chr1	91486619	91488500	1882	*	252.618	Promoter	1	91380857	91487065	106209	2	84146	uc001dnv.3	0	1881
chr1	91965968	91967445	1478	*	122.787	Promoter	1	91966404	91991321	24918	1	8317	uc001doe.3	0	1477
chr1	92545523	92546751	1229	*	64.9417	Promoter	1	92545862	92605329	59468	1	284697	uc031pnb.1	0	1228
chr1	92763837	92765291	1455	*	185.453	Promoter	1	92711955	92764566	52612	2	11146	uc001dor.3	0	1454
chr1	93249949	93251130	1182	*	51.869	Intron (uc001dox.3/7813, intron 1 of 17)	1	92974253	93257961	283709	2	7813	uc001dox.3	6831	1181
chr1	93297501	93298726	1226	*	141.511	Promoter	1	93297594	93307481	9888	1	6125	uc001doz.3	0	1225
chr1	93426374	93427928	1555	*	66.2849	Promoter	1	93298286	93427079	128794	2	388650	uc001dpc.3	0	1554
chr1	93544054	93545939	1886	*	128.968	Promoter	1	93544792	93604638	59847	1	22823	uc001dpi.4	0	1885
chr1	93644765	93646874	2110	*	164.003	Promoter	1	93646281	93744287	98007	1	343099	uc021opx.1	0	2109
chr1	93810626	93812661	2036	*	169.872	Promoter	1	93775666	93811368	35703	2	100131564	uc001dpt.2	0	2035
chr1	93912534	93915241	2708	*	207.398	Promoter	1	93913688	94020218	106531	1	54874	uc001dpv.3	0	2707
chr1	94044205	94047784	3580	*	64.9417	Intron (uc001dpx.5/8412, intron 3 of 7)	1	94027343	94050719	23377	2	8412	uc001dpx.5	2935	3579
chr1	94048699	94051687	2989	*	44.3684	Promoter	1	94027343	94050719	23377	2	8412	uc001dpx.5	0	2988
chr1	94146465	94147772	1308	*	91.4393	Promoter	1	94027343	94146926	119584	2	8412	uc001dpz.4	0	1307
chr1	94311545	94313937	2393	*	149.467	Promoter	1	94312388	94312467	80	1	100126348	uc021oqa.1	0	2392
chr1	94343666	94345481	1816	*	144.683	Promoter	1	94335014	94344762	9749	2	30836	uc001dqf.3	0	1815
chr1	94374022	94375211	1190	*	62.2742	Promoter	1	94352590	94375012	22423	2	2730	uc001dqg.1	0	1189
chr1	94566371	94567798	1428	*	40.7255	Intron (uc001dqh.3/24, intron 5 of 49)	1	94458394	94586705	128312	2	24	uc001dqh.3	18907	1427
chr1	94702388	94703728	1341	*	89.9969	Promoter	1	94634463	94703307	68845	2	9411	uc001dqj.4	0	1340
chr1	94883175	94884902	1728	*	143.095	Promoter	1	94883933	94944260	60328	1	5825	uc001dqm.4	0	1727
chr1	95459028	95461273	2246	*	53.1453	Intron (uc001dra.2/199857, intron 3 of 3)	1	95393584	95428826	35243	1	729970	uc021oqc.2	65444	2245
chr1	95537863	95539259	1397	*	132.082	Promoter	1	95448279	95538507	90229	2	199857	uc001dra.2	0	1396
chr1	95699285	95700238	954	*	82.8601	Promoter	1	95699711	95710509	10799	1	100527978	uc009wdt.3	0	953
chr1	96523907	96528925	5019	*	106.125	Distal Intergenic	1	95940293	95944912	4620	1	440594	uc021oqf.1	583614	5018
chr1	96538345	96543320	4976	*	50.5999	Distal Intergenic	1	95940293	95944912	4620	1	440594	uc021oqf.1	598052	4975
chr1	96628399	96630045	1647	*	44.3684	Distal Intergenic	1	97187175	97239518	52344	1	58155	uc001drm.2	-557130	1646
chr1	97186769	97188805	2037	*	183.785	Promoter	1	97187175	97239518	52344	1	58155	uc001drm.2	0	2036
chr1	99126693	99128204	1512	*	38.3396	Promoter	1	99127236	99226056	98821	1	51375	uc001dsa.3	0	1511
chr1	100231743	100232466	724	*	50.5999	Distal Intergenic	1	100174259	100231349	57091	2	391059	uc001dsh.1	-394	723
chr1	100315154	100316382	1229	*	119.721	Promoter	1	100315640	100389579	73940	1	178	uc001dsi.1	0	1228
chr1	100430157	100433129	2973	*	74.4703	Distal Intergenic	1	100435345	100492534	57190	1	23443	uc001dsp.2	-2216	2972
chr1	100434666	100437498	2833	*	173.839	Promoter	1	100435345	100492534	57190	1	23443	uc001dsp.2	0	2832
chr1	100502683	100505353	2671	*	274.032	Promoter	1	100503789	100548929	45141	1	64645	uc001dst.3	0	2670
chr1	100597822	100599386	1565	*	62.2742	Promoter	1	100549102	100598511	49410	2	163786	uc001dsu.3	0	1564
chr1	100714781	100715442	662	*	59.6323	Promoter	1	100652478	100715409	62932	2	1629	uc001dta.3	0	661
chr1	100731364	100732473	1110	*	106.125	Promoter	1	100731714	100739511	7798	1	8634	uc010ouh.1	0	1109
chr1	100816567	100818919	2353	*	70.3511	Promoter	1	100818023	100856616	38594	1	8556	uc009wec.1	0	2352
chr1	101359899	101362391	2493	*	110.619	Promoter	1	101361632	101447311	85680	1	148867	uc001dtn.2	0	2492
chr1	101490845	101492155	1311	*	58.3212	Promoter	1	101455180	101491362	36183	2	51611	uc001dtq.3	0	1310
chr1	104068236	104069260	1025	*	91.4393	Promoter	1	104068578	104096306	27729	1	55599	uc010oul.1	0	1024
chr1	107598724	107600760	2037	*	317.097	Promoter	1	107599267	107601916	2650	1	55170	uc010ous.2	0	2036
chr1	108167895	108170233	2339	*	35.4599	Intron (uc010ouu.1/10451, intron 2 of 9)	1	108113782	108220631	106850	2	10451	uc010ouu.1	50398	2338
chr1	108224017	108228620	4604	*	109.12	Exon (uc001dvj.1/10451, exon 2 of 10)	1	108113782	108231126	117345	2	10451	uc001dvj.1	2506	4603
chr1	108228708	108235585	6878	*	165.178	Promoter	1	108113782	108231126	117345	2	10451	uc001dvj.1	0	6877
chr1	108740993	108744062	3070	*	473.91	Promoter	1	108677344	108742980	65637	2	29957	uc001dvn.5	0	3069
chr1	108814282	108818388	4107	*	108.999	Exon (uc001dvp.2/uc001dvp.2, exon 1 of 2)	1	108771542	108786703	15162	2	148545	uc009wen.2	-27579	4106
chr1	108923226	108926323	3098	*	93.9955	Exon (uc001dvq.3/uc001dvq.3, exon 6 of 10)	1	108992904	109013260	20357	1	653149	uc009wep.3	-66581	3097
chr1	108961756	108965400	3645	*	115.262	Exon (uc001dvr.2/uc001dvr.2, exon 1 of 2)	1	108992904	109013260	20357	1	653149	uc009wep.3	-27504	3644
chr1	109053634	109058277	4644	*	226.065	Distal Intergenic	1	109102971	109181949	78979	1	284611	uc010ouy.2	-44694	4643
chr1	109060569	109065386	4818	*	310.404	Distal Intergenic	1	109102971	109181949	78979	1	284611	uc010ouy.2	-37585	4817
chr1	109073367	109080015	6649	*	248.358	Distal Intergenic	1	109102971	109181949	78979	1	284611	uc010ouy.2	-22956	6648
chr1	109089916	109093259	3344	*	118.199	Distal Intergenic	1	109102971	109181949	78979	1	284611	uc010ouy.2	-9712	3343
chr1	109093420	109114503	21084	*	410.167	Promoter	1	109102971	109181949	78979	1	284611	uc010ouy.2	0	21083
chr1	109202966	109205061	2096	*	465.449	Promoter	1	109190910	109203744	12835	2	113802	uc001dvt.4	0	2095
chr1	109234088	109237330	3243	*	337.171	Promoter	1	109234932	109244422	9491	1	55119	uc001dvv.4	0	3242
chr1	109288912	109290418	1507	*	328.99	Promoter	1	109289285	109319053	29769	1	6814	uc021oqz.1	0	1506
chr1	109372274	109374045	1772	*	39.2137	Exon (uc001dwa.4/254268, exon 10 of 16)	1	109358520	109399726	41207	2	254268	uc001dwa.4	25681	1771
chr1	109418930	109420514	1585	*	209.986	Promoter	1	109419603	109473044	53442	1	29899	uc010ovc.2	0	1584
chr1	109505025	109506568	1544	*	192.427	Promoter	1	109472130	109506121	33992	2	23155	uc001dwf.2	0	1543
chr1	109583779	109584826	1048	*	153.636	Promoter	1	109512838	109584850	72013	2	22911	uc001dwi.3	24	1047
chr1	109607928	109610296	2369	*	79.3432	Exon (uc001dwm.1/6884, exon 3 of 4)	1	109606998	109618624	11627	2	6884	uc001dwm.1	8328	2368
chr1	109617829	109619452	1624	*	250.813	Promoter	1	109606998	109618624	11627	2	6884	uc001dwm.1	0	1623
chr1	109632050	109634899	2850	*	292.713	Promoter	1	109633403	109639554	6152	1	56900	uc001dwn.3	0	2849
chr1	109642172	109644260	2089	*	427.199	Promoter	1	109642815	109643234	420	1	677766	uc001dwo.1	0	2088
chr1	109723129	109725324	2196	*	34.0223	Intron (uc009wex.2/57535, intron 6 of 19)	1	109729171	109749403	20233	1	57535	uc031pnl.1	-3847	2195
chr1	109755852	109758516	2665	*	183.315	Promoter	1	109756515	109760113	3599	1	6301	uc021orc.1	0	2664
chr1	109780755	109786192	5438	*	356.225	3' UTR	1	109792641	109818378	25738	1	1952	uc001dxa.4	-6449	5437
chr1	109786904	109794461	7558	*	340.178	Promoter	1	109792641	109818378	25738	1	1952	uc001dxa.4	0	7557
chr1	109794650	109800919	6270	*	221.959	Exon (uc001dxa.4/1952, exon 1 of 34)	1	109792641	109818378	25738	1	1952	uc001dxa.4	2009	6269
chr1	109815362	109820953	5592	*	311.899	3' UTR	1	109822176	109825041	2866	2	84722	uc001dxb.3	4088	5591
chr1	109824883	109827039	2157	*	292.133	Promoter	1	109822176	109825041	2866	2	84722	uc001dxb.3	0	2156
chr1	109939435	109942042	2608	*	80.1963	Promoter	1	109852188	109940563	88376	2	6272	uc001dxm.2	0	2607
chr1	109966965	109970135	3171	*	174.594	Promoter	1	109941653	109969070	27418	2	5686	uc001dxn.3	0	3170
chr1	110026437	110027466	1030	*	429.859	Promoter	1	110026561	110035420	8860	1	127002	uc001dxr.3	0	1029
chr1	110036287	110037607	1321	*	133.553	Promoter	1	110036658	110043063	6406	1	284613	uc010ovl.2	0	1320
chr1	110051796	110052372	577	*	46.1995	Promoter	1	110049446	110052336	2891	2	57463	uc001dxx.4	0	576
chr1	110089098	110092107	3010	*	224.438	Promoter	1	110091186	110138454	47269	1	2773	uc001dxz.3	0	3009
chr1	110161926	110163890	1965	*	100.669	Promoter	1	110162126	110173028	10903	1	271	uc009wfg.1	0	1964
chr1	110266790	110272269	5480	*	156.188	Distal Intergenic	1	110280001	110283133	3133	2	2947	uc010ovv.2	10864	5479
chr1	110281540	110283534	1995	*	158.751	Promoter	1	110280001	110283133	3133	2	2947	uc010ovv.2	0	1994
chr1	110501640	110503979	2340	*	39.567	Distal Intergenic	1	110527387	110566364	38978	1	10768	uc001dyx.3	-23408	2339
chr1	110527184	110528461	1278	*	315.866	Promoter	1	110527387	110566364	38978	1	10768	uc001dyx.3	0	1277
chr1	110545302	110547604	2303	*	62.9716	Promoter	1	110546570	110566364	19795	1	10768	uc001dyy.3	0	2302
chr1	110576783	110578125	1343	*	240.037	Promoter	1	110577223	110597424	20202	1	85369	uc001dza.2	0	1342
chr1	110879844	110883323	3480	*	351.336	Promoter	1	110828999	110881793	52795	2	440600	uc001dzj.3	0	3479
chr1	110949512	110951207	1696	*	173.617	Promoter	1	110950431	110958896	8466	1	101410535	uc031pnm.1	0	1695
chr1	111505522	111506683	1162	*	175.489	Promoter	1	111489812	111506566	16755	2	55791	uc001eaa.3	0	1161
chr1	111681884	111683614	1731	*	215.961	Promoter	1	111682249	111703577	21329	1	10390	uc001eag.3	0	1730
chr1	111745330	111747549	2220	*	254.377	Promoter	1	111728591	111747160	18570	2	79961	uc001eal.2	0	2219
chr1	111991183	111992887	1705	*	141.511	Promoter	1	111991462	112002258	10797	1	515	uc009wgf.1	0	1704
chr1	112050129	112052175	2047	*	54.4289	Intron (uc001ebg.4/140, intron 1 of 5)	1	112042051	112046743	4693	2	140	uc001ebh.4	-3386	2046
chr1	112161933	112163929	1997	*	215.961	Promoter	1	112162405	112256101	93697	1	5906	uc001ebk.3	0	1996
chr1	112297333	112299357	2025	*	176.427	Promoter	1	112298190	112310199	12010	1	11218	uc001ebs.3	0	2024
chr1	112531853	112533079	1227	*	52.5628	Promoter	1	112318454	112531777	213324	2	3752	uc001ebv.1	-76	1226
chr1	112938035	112939604	1570	*	103.145	Promoter	1	112938800	113003786	64987	1	55917	uc001ebx.3	0	1569
chr1	113137409	113138791	1383	*	48.0842	Intron (uc009wgh.3/54879, intron 3 of 8)	1	113066141	113153625	87485	2	54879	uc009wgh.3	14834	1382
chr1	113160643	113163271	2629	*	334.12	Promoter	1	113066141	113161550	95410	2	54879	uc001ecc.3	0	2628
chr1	113216620	113218550	1931	*	203.991	Promoter	1	113217048	113243357	26310	1	4343	uc001ecl.2	0	1930
chr1	113241100	113244408	3309	*	33.6764	3' UTR	1	113243749	113249678	5930	2	389	uc001ecp.1	5270	3308
chr1	113246635	113248954	2320	*	106.125	5' UTR	1	113243749	113249678	5930	2	389	uc001ecp.1	724	2319
chr1	113249140	113250450	1311	*	187.124	Promoter	1	113243749	113249678	5930	2	389	uc001ecp.1	0	1310
chr1	113614727	113616787	2061	*	190.52	Promoter	1	113615831	113667342	51512	1	9860	uc001edf.1	0	2060
chr1	113930314	113934557	4244	*	232.936	Promoter	1	113933475	114224924	291450	1	260425	uc001edh.3	0	4243
chr1	114300585	114302644	2060	*	256.526	Promoter	1	114239824	114301777	61954	2	10745	uc009wgp.1	0	2059
chr1	114353305	114356216	2912	*	439.535	Promoter	1	114304454	114355070	50617	2	54665	uc001edq.3	0	2911
chr1	114446641	114449003	2363	*	305.123	Promoter	1	114437371	114447525	10155	2	10717	uc001eeb.3	0	2362
chr1	114471390	114473518	2129	*	395.414	Promoter	1	114471996	114514698	42703	1	204851	uc001eel.3	0	2128
chr1	115052372	115055434	3063	*	440.428	Promoter	1	114935399	115053781	118383	2	51592	uc001eew.3	0	3062
chr1	115123481	115124978	1498	*	176.643	Promoter	1	115110181	115124265	14085	2	10286	uc001efa.3	0	1497
chr1	115258600	115260001	1402	*	318.789	Promoter	1	115247085	115259515	12431	2	4893	uc009wgu.3	0	1401
chr1	115298616	115301465	2850	*	451.319	Promoter	1	115259534	115300671	41138	2	7812	uc001efi.3	0	2849
chr1	115322600	115323872	1273	*	323.572	Promoter	1	115312105	115323308	11204	2	80143	uc001efo.4	0	1272
chr1	116184260	116186249	1990	*	184.171	Promoter	1	116184574	116240845	56272	1	81839	uc001efv.1	0	1989
chr1	116254191	116258324	4134	*	133.686	Intron (uc001efx.4/845, intron 8 of 10)	1	116242626	116311426	68801	2	845	uc001efx.4	53102	4133
chr1	116853715	116856079	2365	*	64.8839	Distal Intergenic	1	116915004	116946597	31594	1	476	uc010owv.1	-58925	2364
chr1	116915106	116917528	2423	*	327.83	Promoter	1	116915795	116928766	12972	1	476	uc001egd.2	0	2422
chr1	116960278	116961857	1580	*	166.224	Promoter	1	116935487	116961244	25758	2	84852	uc009whb.2	0	1579
chr1	117112741	117114227	1487	*	206.66	Promoter	1	117057156	117113715	56560	2	965	uc001egm.3	0	1486
chr1	117209197	117210843	1647	*	129.382	Promoter	1	117117020	117209578	92559	2	3321	uc031pnr.1	0	1646
chr1	117395472	117397354	1883	*	73.0817	Distal Intergenic	1	117452689	117532972	80284	1	5738	uc001egv.1	-55335	1882
chr1	117452467	117453471	1005	*	49.9581	Promoter	1	117452689	117532972	80284	1	5738	uc001egv.1	0	1004
chr1	117601358	117603624	2267	*	332.953	Promoter	1	117602949	117624997	22049	1	8458	uc001egx.1	0	2266
chr1	117663369	117665611	2243	*	384.588	Promoter	1	117653677	117664411	10735	2	80263	uc001egz.2	0	2242
chr1	117750987	117754938	3952	*	104.689	Promoter	1	117686209	117753582	67374	2	79679	uc001ehb.3	0	3951
chr1	117809245	117815261	6017	*	266.634	Distal Intergenic	1	117686209	117753582	67374	2	79679	uc021oso.1	-55663	6016
chr1	117908379	117911691	3313	*	548.823	Promoter	1	117910085	118042176	132092	1	10905	uc009whg.1	0	3312
chr1	118131650	118135173	3524	*	107	Distal Intergenic	1	118148604	118171011	22408	1	54855	uc001ehe.3	-13431	3523
chr1	118147399	118150069	2671	*	122.283	Promoter	1	118148604	118171011	22408	1	54855	uc001ehe.3	0	2670
chr1	118471448	118473094	1647	*	112.125	Promoter	1	118472372	118484470	12099	1	10885	uc001ehh.2	0	1646
chr1	119682491	119684365	1875	*	256.151	Promoter	1	119573839	119682973	109135	2	10352	uc010oxf.2	0	1874
chr1	120190062	120191356	1295	*	60.95	Promoter	1	120162000	120190390	28391	2	90874	uc001ehy.1	0	1294
chr1	120254486	120255968	1483	*	55.7194	Promoter	1	120254419	120286849	32431	1	26227	uc009whm.3	67	1482
chr1	120603368	120605226	1859	*	89.8492	Intron (uc001eik.3/4853, intron 1 of 33)	1	120454176	120612317	158142	2	4853	uc001eik.3	7091	1858
chr1	120610610	120612927	2318	*	372.826	Promoter	1	120454176	120612317	158142	2	4853	uc001eik.3	0	2317
chr1	120835935	120836873	939	*	39.6907	Distal Intergenic	1	120839005	120855681	16677	1	653820	uc009whp.3	-2132	938
chr1	120836975	120838477	1503	*	114.199	Distal Intergenic	1	120839005	120855681	16677	1	653820	uc009whp.3	-528	1502
chr1	120838885	120840327	1443	*	108.397	Promoter	1	120839005	120855681	16677	1	653820	uc009whp.3	0	1442
chr1	120904264	120905887	1624	*	171.594	Distal Intergenic	1	120906034	120914842	8809	1	337875	uc001eio.2	-147	1623
chr1	120906026	120907008	983	*	113.478	Promoter	1	120906034	120914842	8809	1	337875	uc001eio.2	0	982
chr1	120924838	120926234	1397	*	126.727	3' UTR	1	120926128	120935944	9817	2	2210	uc001eip.3	9710	1396
chr1	142890455	142891069	615	*	57.3829	Exon (uc001ejd.1/uc001ejd.1, exon 1 of 5)	1	142697421	142713605	16185	2	100874392	uc031pnv.1	-176850	614
chr1	143670515	143670923	409	*	54.7242	Intron (uc001ejp.3/100286793, intron 1 of 3)	1	143687130	143705973	18844	1	100130000	uc009whw.2	-16207	408
chr1	143672484	143674047	1564	*	372.005	Intron (uc001ejp.3/100286793, intron 1 of 3)	1	143687130	143705973	18844	1	100130000	uc009whw.2	-13083	1563
chr1	143686849	143687882	1034	*	133.79	Promoter	1	143687130	143705973	18844	1	100130000	uc009whw.2	0	1033
chr1	143742654	143744395	1742	*	177.938	Exon (uc001ejp.3/100286793, exon 1 of 4)	1	143647639	143744587	96949	2	100286793	uc001ejp.3	192	1741
chr1	143911880	143913219	1340	*	150.424	Promoter	1	143896452	143913143	16692	2	728833	uc002qvn.1	0	1339
chr1	143913555	143916220	2666	*	191.306	5' UTR	1	143896452	143913143	16692	2	728833	uc010evy.1	-412	2665
chr1	144028751	144030096	1346	*	51.9683	Intron (uc010oxm.1/uc010oxm.1, intron 2 of 3)	1	143896452	143913143	16692	2	728833	uc010evy.1	-115608	1345
chr1	144310704	144311880	1177	*	65.7111	Intron (uc010oxn.2/728841, intron 15 of 18)	1	144300512	144340773	40262	2	728855	uc001ekr.4	28893	1176
chr1	144339165	144340752	1588	*	107.793	Promoter	1	144300512	144340773	40262	2	728855	uc001ekr.4	21	1587
chr1	144491095	144492005	911	*	77.245	Intron (uc010oxn.2/728841, intron 15 of 18)	1	144480745	144521009	40265	2	728875	uc001ela.4	29004	910
chr1	144519497	144520844	1348	*	95.5228	Exon (uc001ela.4/728875, exon 1 of 2)	1	144480745	144521009	40265	2	728875	uc001ela.4	165	1347
chr1	144593236	144594427	1192	*	175.243	Promoter	1	144593696	144615303	21608	1	400818	uc009wif.1	0	1191
chr1	144930648	144933842	3195	*	356.392	Promoter	1	144890591	144932032	41442	2	9659	uc001emb.1	0	3194
chr1	145096061	145097081	1021	*	136.656	Promoter	1	145096407	145116997	20591	1	9554	uc031poa.1	0	1020
chr1	145139015	145140205	1191	*	177.554	Intron (uc021ott.2/100288142, intron 53 of 131)	1	145096407	145116997	20591	1	9554	uc031poa.1	42608	1190
chr1	145208508	145210851	2344	*	389.147	Promoter	1	145209111	145304652	95542	1	100132406	uc021ouk.1	0	2343
chr1	145216063	145218211	2149	*	100.384	Intron (uc021ott.2/100288142, intron 53 of 131)	1	145224597	145285912	61316	1	388677	uc031pob.1	-6386	2148
chr1	145381922	145383468	1547	*	358.528	Intron (uc021ott.2/100288142, intron 99 of 131)	1	145360555	145364674	4120	1	100132406	uc021ouq.1	21367	1546
chr1	145395505	145397909	2405	*	158.589	Exon (uc021out.1/uc021out.1, exon 1 of 1)	1	145413191	145417545	4355	1	148738	uc001eni.2	-15282	2404
chr1	145437823	145439508	1686	*	90.5803	Promoter	1	145438462	145442628	4167	1	10628	uc001enn.4	0	1685
chr1	145454225	145456580	2356	*	196.888	3' UTR	1	145456236	145470387	14152	2	84265	uc001enp.1	13807	2355
chr1	145469682	145471314	1633	*	111.814	Promoter	1	145470508	145475647	5140	1	284615	uc001enq.1	0	1632
chr1	145506120	145508821	2702	*	458.008	Promoter	1	145507557	145513535	5979	1	9939	uc001ent.2	0	2701
chr1	145514759	145517446	2688	*	352.112	Promoter	1	145516165	145523732	7568	1	8799	uc001eny.2	0	2687
chr1	145541540	145545193	3654	*	251.967	3' UTR	1	145549209	145563099	13891	1	148741	uc010oyx.1	-4016	3653
chr1	145574689	145576771	2083	*	210.993	Promoter	1	145575290	145580662	5373	1	10401	uc010oyy.1	0	2082
chr1	145588525	145589624	1100	*	224.174	Promoter	1	145586493	145589435	2943	2	200035	uc001eoe.3	0	1099
chr1	145609768	145611727	1960	*	389.049	Promoter	1	145592605	145610627	18023	2	10623	uc001eog.3	0	1959
chr1	145825922	145827674	1753	*	202.913	Promoter	1	145764595	145826450	61856	2	653519	uc010ozb.1	0	1752
chr1	145968413	145970556	2144	*	435.273	Intron (uc021ott.2/100288142, intron 99 of 131)	1	145924388	145942619	18232	2	728939	uc001eov.1	-25794	2143
chr1	146081261	146083359	2099	*	244.911	Promoter	1	146032542	146082431	49890	2	728912	uc001eoz.3	0	2098
chr1	146372887	146375204	2318	*	214.034	Promoter	1	146373857	146467744	93888	1	149013	uc031poi.1	0	2317
chr1	146555655	146557056	1402	*	298.026	Distal Intergenic	1	146571066	146585928	14863	2	644861	uc031poj.1	28872	1401
chr1	146642712	146645415	2704	*	281.385	Promoter	1	146626685	146644129	17445	2	5565	uc001epe.3	0	2703
chr1	146713763	146715525	1763	*	401.692	Promoter	1	146714291	146767447	53157	1	9557	uc001epm.5	0	1762
chr1	147070943	147072743	1801	*	162.887	Intron (uc001epq.3/607, intron 1 of 9)	1	147083377	147096757	13381	1	607	uc010ozr.1	-10634	1800
chr1	147141472	147143397	1926	*	160.346	Promoter	1	147119168	147142634	23467	2	51205	uc001epr.2	0	1925
chr1	147188443	147190215	1773	*	148.285	Distal Intergenic	1	147228332	147232714	4383	2	2702	uc001eps.1	42499	1772
chr1	147399827	147401534	1708	*	176.53	Promoter	1	147400506	147465025	64520	1	51463	uc010ozs.1	0	1707
chr1	147510252	147512299	2048	*	416.174	Distal Intergenic	1	147466094	147484331	18238	2	728939	uc001epz.1	-25921	2047
chr1	147623070	147625125	2056	*	222.89	Promoter	1	147574323	147624267	49945	2	728912	uc001eqc.3	0	2055
chr1	147735039	147737272	2234	*	389.049	Intron (uc001eqe.3/728841, intron 12 of 13)	1	147806603	147806678	76	2	100847044	uc031pom.1	69406	2233
chr1	147805711	147807813	2103	*	310.476	Promoter	1	147806603	147806678	76	2	100847044	uc031pom.1	0	2102
chr1	147859991	147861584	1594	*	386.053	Intron (uc001eqe.3/728841, intron 12 of 13)	1	147806603	147806678	76	2	100847044	uc031pom.1	-53313	1593
chr1	147874315	147875227	913	*	153.505	Exon (uc010paa.1/uc010paa.1, exon 1 of 2)	1	147905097	147931904	26808	2	388685	uc001eqn.3	56677	912
chr1	147930411	147931943	1533	*	185.52	Promoter	1	147905097	147931904	26808	2	388685	uc001eqn.3	0	1532
chr1	147993195	147995836	2642	*	356.168	Intron (uc001eqe.3/728841, intron 12 of 13)	1	148005403	148011788	6386	2	728841	uc010pad.1	15952	2641
chr1	147999427	148001179	1753	*	291.158	Exon (uc021ovy.1/uc021ovy.1, exon 1 of 1)	1	148005403	148011788	6386	2	728841	uc010pad.1	10609	1752
chr1	148175960	148176917	958	*	62.9373	Promoter	1	147930761	148176401	245641	2	388685	uc001eqo.1	0	957
chr1	148240498	148243223	2726	*	320.799	Intron (uc001eqe.3/728841, intron 1 of 13)	1	148011680	148258489	246810	2	25832	uc021owf.2	15266	2725
chr1	148246930	148248541	1612	*	362.865	Exon (uc021owi.1/uc021owi.1, exon 1 of 1)	1	148011680	148258489	246810	2	25832	uc021owf.2	9948	1611
chr1	148555417	148557279	1863	*	244.518	Exon (uc010pay.2/uc010pay.2, exon 1 of 1)	1	148558188	148596267	38080	1	284565	uc001esb.2	-909	1862
chr1	148598031	148599688	1658	*	343.941	Exon (uc021oxb.1/uc021oxb.1, exon 1 of 1)	1	148560847	148596267	35421	1	284565	uc001esc.2	37184	1657
chr1	148603384	148606058	2675	*	271.563	Distal Intergenic	1	148644011	148644795	785	1	730262	uc010paz.2	-37953	2674
chr1	148759976	148761868	1893	*	236.27	Exon (uc021oxc.1/uc021oxc.1, exon 1 of 1)	1	148739562	148758311	18750	1	728936	uc009wkt.1	20414	1892
chr1	148765419	148768140	2722	*	234.516	Distal Intergenic	1	148739562	148758311	18750	1	728936	uc009wkt.1	25857	2721
chr1	148928269	148929004	736	*	50.8246	Promoter	1	148928286	148951595	23310	1	645166	uc010pbc.1	0	735
chr1	149215249	149216326	1078	*	163.315	Distal Intergenic	1	149279476	149291742	12267	1	388692	uc010pbf.2	-63150	1077
chr1	149222307	149225576	3270	*	421.104	Distal Intergenic	1	149279476	149291742	12267	1	388692	uc010pbf.2	-53900	3269
chr1	149379238	149380435	1198	*	101.566	Distal Intergenic	1	149370547	149375252	4706	1	100132417	uc009wkz.1	8691	1197
chr1	149398444	149399187	744	*	101.876	Exon (uc010pbi.2/uc010pbi.2, exon 1 of 1)	1	149370547	149375252	4706	1	100132417	uc009wkz.1	27897	743
chr1	149399346	149400638	1293	*	137.674	Exon (uc021oxp.1/uc021oxp.1, exon 1 of 1)	1	149370547	149375252	4706	1	100132417	uc009wkz.1	28799	1292
chr1	149512631	149515230	2600	*	201.885	Distal Intergenic	1	149553003	149553787	785	1	653505	uc001esj.3	-37773	2599
chr1	149576499	149577950	1452	*	132.143	Exon (uc009wlb.1/uc009wlb.1, exon 1 of 1)	1	149576262	149616786	40525	1	728855	uc001esl.5	237	1451
chr1	149605297	149606392	1096	*	189.376	Intron (uc001esk.5/728855, intron 1 of 1)	1	149576262	149616786	40525	1	728855	uc001esl.5	29035	1095
chr1	149763984	149765711	1728	*	233.79	5' UTR	1	149755503	149760173	4671	1	2209	uc009wlh.1	8481	1727
chr1	149782063	149786097	4035	*	392.347	Promoter	1	149754245	149783928	29684	2	440689	uc010pbj.2	0	4034
chr1	149801726	149817659	15934	*	588.139	Promoter	1	149812259	149812765	507	2	126961	uc001esv.3	0	15933
chr1	149819014	149835217	16204	*	513.149	Promoter	1	149824181	149824687	507	1	126961	uc001esy.3	0	16203
chr1	149855239	149861482	6244	*	537.822	Promoter	1	149859019	149859466	448	2	317772	uc001ete.3	0	6243
chr1	149870873	149872333	1461	*	321.205	Promoter	1	149871155	149872348	1194	1	51027	uc001etf.3	0	1460
chr1	149898712	149900802	2091	*	435.261	Promoter	1	149895209	149900144	4936	2	10262	uc001etk.2	0	2090
chr1	149907865	149912622	4758	*	323.712	Promoter	1	149900543	149908266	7724	2	10903	uc001etm.2	0	4757
chr1	149981051	149983288	2238	*	316.403	Promoter	1	149912232	149982686	70455	2	56957	uc001etn.3	0	2237
chr1	150038566	150040674	2109	*	361.246	Promoter	1	150039342	150065744	26403	1	11311	uc009wlm.1	0	2108
chr1	150121681	150122929	1249	*	37.4005	Promoter	1	150121767	150131825	10059	1	51177	uc001ets.3	0	1248
chr1	150185374	150186602	1229	*	65.1176	Distal Intergenic	1	150190717	150199127	8411	2	81611	uc010pbt.2	12525	1228
chr1	150206917	150209616	2700	*	113.56	Promoter	1	150190717	150207026	16310	2	81611	uc010pbu.2	0	2699
chr1	150240086	150242152	2067	*	412.873	Promoter	1	150237799	150241609	3811	2	51107	uc001ety.2	0	2066
chr1	150253702	150255634	1933	*	100.6	Promoter	1	150254953	150259501	4549	1	148523	uc001euh.3	0	1932
chr1	150265639	150267483	1845	*	229.101	Promoter	1	150266269	150280819	14551	1	54460	uc001euk.3	0	1844
chr1	150293094	150295209	2116	*	445.635	Promoter	1	150293928	150301344	7417	1	9129	uc009wlo.3	0	2115
chr1	150335008	150338919	3912	*	514.586	Promoter	1	150336990	150446032	109043	1	23248	uc010pcc.1	0	3911
chr1	150459251	150460571	1321	*	127.334	Promoter	1	150459840	150480085	20246	1	80222	uc001euq.4	0	1320
chr1	150487527	150488767	1241	*	80.491	Promoter	1	150488233	150490508	2276	1	100874054	uc031pos.1	0	1240
chr1	150521056	150521794	739	*	54.6671	Distal Intergenic	1	150521898	150531223	9326	1	54507	uc001euw.3	-104	738
chr1	150532929	150537235	4307	*	493.794	3' UTR	1	150530421	150533412	2992	1	54507	uc009wlx.3	2508	4306
chr1	150539405	150541829	2425	*	101.252	Distal Intergenic	1	150530421	150533412	2992	1	54507	uc009wlx.3	8984	2424
chr1	150549934	150553011	3078	*	461.314	Promoter	1	150547027	150552086	5060	2	4170	uc010pch.2	0	3077
chr1	150595052	150598321	3270	*	87.6155	3' UTR	1	150594599	150601609	7011	2	2029	uc001evb.3	3288	3269
chr1	150600606	150603261	2656	*	436.072	Promoter	1	150594599	150601609	7011	2	2029	uc001evb.3	0	2655
chr1	150668833	150669715	883	*	129.213	Promoter	1	150618701	150669672	50972	2	55204	uc001evj.2	0	882
chr1	150848180	150850119	1940	*	188.007	Promoter	1	150782181	150849244	67064	2	405	uc001evr.2	0	1939
chr1	150897620	150899812	2193	*	372.89	Promoter	1	150898815	150917797	18983	1	9869	uc001evw.4	0	2192
chr1	150942159	150947954	5796	*	363.322	Promoter	1	150937649	150947479	9831	2	29956	uc001evy.3	0	5795
chr1	150951501	150956243	4743	*	182.378	Promoter	1	150954499	150968114	13616	1	8416	uc001ewa.2	0	4742
chr1	150977632	150981909	4278	*	178.594	Promoter	1	150969301	150979273	9973	2	55793	uc001ewc.3	0	4277
chr1	151019579	151021499	1921	*	386.738	Promoter	1	151020259	151023871	3613	1	54964	uc001ewn.3	0	1920
chr1	151030305	151033001	2697	*	470.221	Promoter	1	151032151	151040973	8823	1	10962	uc001ewq.3	0	2696
chr1	151041994	151044553	2560	*	527.851	Promoter	1	151043080	151076151	33072	1	126626	uc010pcp.1	0	2559
chr1	151137685	151139583	1899	*	178.27	Promoter	1	151132224	151138370	6147	2	388695	uc001ewy.3	0	1898
chr1	151161826	151163337	1512	*	267.901	Promoter	1	151148776	151162689	13914	2	6944	uc001exe.2	0	1511
chr1	151167176	151172548	5373	*	352.315	Promoter	1	151171021	151219441	48421	1	8394	uc021oyo.1	0	5372
chr1	151226494	151228604	2111	*	374.888	Promoter	1	151227197	151239954	12758	1	5710	uc001exl.3	0	2110
chr1	151253210	151256627	3418	*	490.974	Promoter	1	151254094	151260882	6789	1	57592	uc001exp.1	0	3417
chr1	151298672	151301150	2479	*	402.271	Promoter	1	151264273	151300191	35919	2	5298	uc001exr.3	0	2478
chr1	151318508	151320904	2397	*	242.358	Promoter	1	151313116	151319769	6654	2	5993	uc001exv.1	0	2396
chr1	151343529	151345677	2149	*	182.428	Promoter	1	151336778	151345210	8433	2	8991	uc001exx.4	0	2148
chr1	151371298	151372956	1659	*	225.056	Promoter	1	151372041	151373603	1563	1	5692	uc010pda.2	0	1658
chr1	151429827	151432722	2896	*	435.781	Promoter	1	151375200	151431941	56742	2	23126	uc001eyd.2	0	2895
chr1	151445188	151446442	1255	*	273.253	Distal Intergenic	1	151398679	151431941	33263	2	23126	uc001eyg.2	-13247	1254
chr1	151483332	151487766	4435	*	290.839	Promoter	1	151483862	151511167	27306	1	57530	uc009wmw.3	0	4434
chr1	151511433	151513923	2491	*	390.251	Promoter	1	151512781	151556059	43279	1	7286	uc001eyl.3	0	2490
chr1	151584176	151585395	1220	*	391.988	Promoter	1	151584541	151671559	87019	1	81609	uc031ppc.1	0	1219
chr1	151711181	151712654	1474	*	90.7129	Distal Intergenic	1	151694013	151702082	8070	1	284485	uc010pdj.1	17168	1473
chr1	151735026	151737003	1978	*	248.467	Promoter	1	151735445	151743806	8362	1	51686	uc010pdl.2	0	1977
chr1	151762150	151764468	2319	*	266.19	Promoter	1	151742583	151763010	20428	2	11022	uc001eyy.2	0	2318
chr1	151803381	151805881	2501	*	42.3357	Promoter	1	151778547	151804348	25802	2	6097	uc001ezh.3	0	2500
chr1	151808409	151810644	2236	*	113.591	3' UTR	1	151810945	151816641	5697	1	100132111	uc010pdr.2	-301	2235
chr1	151811284	151813425	2142	*	384.044	Promoter	1	151810339	151813033	2695	2	100191040	uc010pdq.1	0	2141
chr1	151881236	151882714	1479	*	223.865	Promoter	1	151843343	151882361	39019	2	117145	uc001ezj.2	0	1478
chr1	151961171	151967111	5941	*	273.372	Promoter	1	151955386	151966714	11329	2	6281	uc001ezl.3	0	5940
chr1	152006180	152010021	3842	*	436.166	Promoter	1	152004982	152009511	4530	2	6282	uc001ezn.3	0	3841
chr1	152018690	152021897	3208	*	330.749	Distal Intergenic	1	152004982	152009511	4530	2	6282	uc001ezn.3	-9179	3207
chr1	152081613	152084061	2449	*	184.16	Exon (uc001ezp.3/7062, exon 3 of 3)	1	152078793	152087930	9138	2	7062	uc001ezp.3	3869	2448
chr1	153094831	153096388	1558	*	123.776	Intron (uc001fbf.3/6700, intron 1 of 1)	1	153084613	153085989	1377	2	6705	uc001fbi.3	-8842	1557
chr1	153336800	153338645	1846	*	33.5112	Distal Intergenic	1	153330330	153333503	3174	1	6280	uc001fbq.3	6470	1845
chr1	153537859	153539935	2077	*	81.9152	Promoter	1	153533585	153538306	4722	2	6273	uc001fcb.3	0	2076
chr1	153579816	153584039	4224	*	256.778	Promoter	1	153579367	153581481	2115	2	140576	uc001fcc.3	0	4223
chr1	153587621	153589828	2208	*	50.5999	Promoter	1	153586732	153588808	2077	2	57402	uc001fce.3	0	2207
chr1	153598253	153600744	2492	*	266.473	Promoter	1	153591276	153599539	8264	2	6284	uc001fcf.4	0	2491
chr1	153605513	153608929	3417	*	591.852	Promoter	1	153606458	153611374	4917	1	26097	uc009woi.2	0	3416
chr1	153630728	153632371	1644	*	303.033	Promoter	1	153631130	153634328	3199	1	23557	uc001fcq.4	0	1643
chr1	153642407	153643596	1190	*	203.429	Promoter	1	153634264	153643504	9241	2	3608	uc001fcr.4	0	1189
chr1	153699663	153701404	1742	*	444.503	Promoter	1	153700549	153746555	46007	1	65123	uc009wom.3	0	1741
chr1	153747218	153749227	2010	*	334.234	Promoter	1	153747768	153752633	4866	1	11000	uc001fcz.3	0	2009
chr1	153755321	153756870	1550	*	365.35	Distal Intergenic	1	153747768	153752633	4866	1	11000	uc009won.3	7553	1549
chr1	153894156	153896944	2789	*	279.742	Promoter	1	153777203	153895451	118249	2	57459	uc001fdb.4	0	2788
chr1	153917936	153919847	1912	*	449.143	Promoter	1	153901977	153919154	17178	2	9909	uc001fdd.1	0	1911
chr1	153929927	153931312	1386	*	333.406	Promoter	1	153920148	153931132	10985	2	200186	uc021pab.1	0	1385
chr1	153934534	153937946	3413	*	349.235	Promoter	1	153931575	153935844	4270	2	27173	uc001fdi.4	0	3412
chr1	153938360	153941554	3195	*	372.997	Promoter	1	153940315	153941641	1327	1	148327	uc031ppj.1	0	3194
chr1	153948663	153951265	2603	*	421.178	Promoter	1	153946745	153950451	3707	2	10899	uc001fds.3	0	2602
chr1	153957880	153960218	2339	*	108.208	Promoter	1	153954093	153958853	4761	2	5872	uc001fdt.2	0	2338
chr1	153962669	153964506	1838	*	334.277	Promoter	1	153963239	153964631	1393	1	6232	uc001fdv.3	0	1837
chr1	154153932	154156536	2605	*	195.512	Promoter	1	154127780	154155682	27903	2	7170	uc010pei.1	0	2604
chr1	154191733	154194839	3107	*	383.562	Promoter	1	154179183	154193273	14091	2	25912	uc001feg.2	0	3106
chr1	154244251	154245877	1627	*	170.548	Promoter	1	154245039	154248355	3317	1	10456	uc001fes.3	0	1626
chr1	154530060	154532467	2408	*	252.618	Promoter	1	154521051	154531120	10070	2	55585	uc001fff.1	0	2407
chr1	154579729	154581684	1956	*	315.935	Promoter	1	154554534	154580724	26191	2	103	uc001ffh.3	0	1955
chr1	154599178	154600967	1790	*	214.243	Promoter	1	154554534	154600456	45923	2	103	uc001ffk.3	0	1789
chr1	154908290	154910826	2537	*	377.439	Promoter	1	154897208	154909484	12277	2	10654	uc001ffq.3	0	2536
chr1	154933042	154935683	2642	*	522.568	Promoter	1	154929502	154934258	4757	2	90780	uc001fft.3	0	2641
chr1	154942613	154949749	7137	*	398.898	Promoter	1	154948169	154948259	91	1	100423020	uc021pai.1	0	7136
chr1	154955734	154957132	1399	*	88.5535	Promoter	1	154955770	154961488	5719	1	80308	uc001fgc.3	0	1398
chr1	154971312	154979658	8347	*	493.001	Promoter	1	154975106	154991001	15896	1	51043	uc001fgj.4	0	8346
chr1	154983318	154984694	1377	*	40.7255	5' UTR	1	154986924	154991001	4078	1	51043	uc001fgl.4	-2230	1376
chr1	154988953	154991189	2237	*	97.2577	3' UTR	1	154986924	154991001	4078	1	51043	uc001fgl.4	2029	2236
chr1	155022355	155024617	2263	*	153.334	Promoter	1	155017668	155023641	5974	2	100505666	uc021pam.1	0	2262
chr1	155035269	155037141	1873	*	274.032	Promoter	1	155017668	155036467	18800	2	100505666	uc021pan.2	0	1872
chr1	155050635	155059124	8490	*	319.629	Promoter	1	155051348	155060014	8667	1	1944	uc001fhf.3	0	8489
chr1	155096496	155103473	6978	*	256.164	Promoter	1	155100349	155107386	7038	1	1942	uc001fhh.3	0	6977
chr1	155106803	155110227	3425	*	304.9	Promoter	1	155108288	155111334	3047	1	55974	uc001fhj.4	0	3424
chr1	155111435	155113269	1835	*	162.01	Promoter	1	155112367	155112883	517	2	54344	uc001fhm.3	0	1834
chr1	155144938	155146135	1198	*	205.693	Promoter	1	155141884	155145804	3921	2	200185	uc001fho.3	0	1197
chr1	155148415	155151299	2885	*	299.076	5' UTR	1	155147230	155157447	10218	1	80128	uc031pps.1	1185	2884
chr1	155161091	155165252	4162	*	165.634	Promoter	1	155158300	155161398	3099	2	4582	uc001fhz.3	0	4161
chr1	155177949	155179547	1599	*	288.67	Promoter	1	155178490	155183624	5135	1	4580	uc001fjb.3	0	1598
chr1	155193994	155198349	4356	*	174.594	Promoter	1	155183616	155197325	13710	2	2630	uc001fje.4	0	4355
chr1	155213406	155215668	2263	*	119.721	Promoter	1	155204239	155214653	10415	2	2629	uc001fjk.3	0	2262
chr1	155224421	155225679	1259	*	122.737	Promoter	1	155216996	155225274	8279	2	10712	uc001fjm.3	0	1258
chr1	155230973	155232802	1830	*	178.798	Promoter	1	155225770	155232176	6407	2	10067	uc001fjs.3	0	1829
chr1	155242402	155244088	1687	*	395.054	Promoter	1	155232659	155243281	10623	2	1196	uc001fjw.3	0	1686
chr1	155247162	155248413	1252	*	80.0418	Promoter	1	155232659	155247501	14843	2	1196	uc009wqm.3	0	1251
chr1	155277443	155280112	2670	*	187.114	Promoter	1	155278539	155290457	11919	1	2224	uc001fkc.2	0	2669
chr1	155292425	155295803	3379	*	235.123	Promoter	1	155293285	155300909	7625	1	23623	uc009wqo.1	0	3378
chr1	155531105	155534771	3667	*	433.78	Promoter	1	155305052	155532324	227273	2	55870	uc001fkt.3	0	3666
chr1	155578973	155580648	1676	*	106.125	Promoter	1	155579961	155584758	4798	1	55154	uc001fkw.4	0	1675
chr1	155657005	155661137	4133	*	379.488	Promoter	1	155629233	155658447	29215	2	55249	uc001flh.3	0	4132
chr1	155714848	155716162	1315	*	63.6048	Promoter	1	155715559	155717687	2129	1	100129405	uc010pgn.2	0	1314
chr1	155826447	155827636	1190	*	80.0418	Promoter	1	155719510	155826972	107463	2	54856	uc001fly.1	0	1189
chr1	155880140	155881700	1561	*	92.8867	Promoter	1	155867599	155880706	13108	2	6016	uc031pqc.1	0	1560
chr1	155903034	155905324	2291	*	252.618	Promoter	1	155882836	155904188	21353	2	22889	uc001fmi.1	0	2290
chr1	155989919	155990885	967	*	124.434	Promoter	1	155978839	155990758	11920	2	6746	uc001fmx.3	0	966
chr1	156022706	156025496	2791	*	345.702	Promoter	1	156024517	156028605	4089	1	28956	uc001fnb.3	0	2790
chr1	156030098	156032080	1983	*	71.7184	Promoter	1	156030966	156040295	9330	1	57111	uc001fnc.3	0	1982
chr1	156083502	156087594	4093	*	173.839	Promoter	1	156084461	156108548	24088	1	4000	uc001fng.2	0	4092
chr1	156091330	156097606	6277	*	116.898	Promoter	1	156095951	156108548	12598	1	4000	uc001fnj.3	0	6276
chr1	156098956	156100690	1735	*	38.3396	5' UTR	1	156096346	156109880	13535	1	4000	uc001fnk.3	2610	1734
chr1	156162870	156164565	1696	*	132.358	Promoter	1	156163730	156182587	18858	1	9673	uc001fnp.3	0	1695
chr1	156182192	156183976	1785	*	292.575	Promoter	1	156182779	156207082	24304	1	100527963	uc031pqd.1	0	1784
chr1	156251294	156253574	2281	*	279.113	Promoter	1	156219015	156252620	33606	2	23381	uc001foc.4	0	2280
chr1	156254050	156255360	1311	*	54.4289	Promoter	1	156254070	156262234	8165	1	84283	uc009wrw.3	0	1310
chr1	156306640	156309213	2574	*	236.351	Promoter	1	156307105	156316785	9681	1	128229	uc001foo.3	0	2573
chr1	156425940	156428013	2074	*	330.038	Distal Intergenic	1	156395430	156400493	5064	2	10485	uc001fpa.3	-25447	2073
chr1	156440796	156442959	2164	*	59.6323	Intron (uc001fpb.4/4209, intron 8 of 10)	1	156433513	156460391	26879	2	4209	uc001fpb.4	17432	2163
chr1	156469248	156471889	2642	*	483.041	Promoter	1	156433513	156470634	37122	2	4209	uc001fpc.4	0	2641
chr1	156473433	156475820	2388	*	76.1145	Distal Intergenic	1	156433520	156470634	37115	2	4209	uc001fpe.2	-2799	2387
chr1	156560969	156562229	1261	*	104.636	Promoter	1	156561558	156562558	1001	1	128240	uc031pqp.1	0	1260
chr1	156570346	156571902	1557	*	73.0864	Promoter	1	156564100	156571279	7180	2	54865	uc001fpl.3	0	1556
chr1	156659065	156666801	7737	*	395.054	Downstream (2-3kb)	1	156669400	156675459	6060	2	1382	uc001fpr.3	8658	7736
chr1	156671741	156676351	4611	*	205.693	Promoter	1	156669400	156675459	6060	2	1382	uc001fpr.3	0	4610
chr1	156697265	156699249	1985	*	420.154	Promoter	1	156698263	156706752	8490	1	51093	uc001fpu.3	0	1984
chr1	156710017	156710983	967	*	110.619	Promoter	1	156707094	156710923	3830	2	79590	uc001fpw.1	0	966
chr1	156711088	156711752	665	*	62.2742	Downstream (<1kb)	1	156707094	156710923	3830	2	79590	uc001fpx.1	-165	664
chr1	156715752	156722622	6871	*	467.178	Promoter	1	156711899	156721085	9187	2	3068	uc009wsd.3	0	6870
chr1	156735562	156738583	3022	*	325.17	Promoter	1	156711899	156736717	24819	2	3068	uc009wsf.3	0	3021
chr1	157014671	157016286	1616	*	87.1269	Promoter	1	156904632	157015162	110531	2	9826	uc001fqn.3	0	1615
chr1	157101562	157102579	1018	*	41.9594	Intron (uc001fqr.2/2117, intron 4 of 4)	1	157098154	157098463	310	1	360155	uc001fqs.3	3408	1017
chr1	157107435	157108895	1461	*	111.387	Promoter	1	157094459	157108383	13925	2	2117	uc001fqr.2	0	1460
chr1	159750577	159751448	872	*	100.195	Promoter	1	159750759	159752333	1575	1	54935	uc001ftz.1	0	871
chr1	159869517	159871906	2390	*	92.8867	Promoter	1	159842154	159869906	27753	2	25790	uc001fui.3	0	2389
chr1	159892653	159895845	3193	*	245.553	Promoter	1	159887897	159893507	5611	2	8407	uc031pqt.1	0	3192
chr1	159914675	159917014	2340	*	229.798	Promoter	1	159896829	159915386	18558	2	57549	uc001fuq.2	0	2339
chr1	160175010	160175784	775	*	60.95	Promoter	1	160175125	160185162	10038	1	8682	uc001fvk.3	0	774
chr1	160231346	160233041	1696	*	200.595	Promoter	1	160185505	160232277	46773	2	50717	uc001fvo.2	0	1695
chr1	160254303	160255069	767	*	84.2716	Promoter	1	160185505	160254941	69437	2	50717	uc010pjc.1	0	766
chr1	160312453	160313907	1455	*	118.193	Promoter	1	160258377	160313354	54978	2	1314	uc001fvv.4	0	1454
chr1	160989875	160991046	1172	*	119.721	Promoter	1	160965001	160990902	25902	2	50848	uc010pjv.2	0	1171
chr1	160991128	160991954	827	*	59.6323	Promoter	1	160965001	160991133	26133	2	50848	uc009wtt.3	0	826
chr1	161007421	161009324	1904	*	277.631	Promoter	1	161007422	161008774	1353	2	100131187	uc001fxh.4	0	1903
chr1	161014391	161016650	2260	*	143.095	Promoter	1	161009041	161014727	5687	2	7391	uc031pqv.1	0	2259
chr1	161052073	161057263	5191	*	58.3212	Intron (uc001fxo.2/81607, intron 1 of 8)	1	161040781	161059385	18605	2	81607	uc001fxo.2	2122	5190
chr1	161058249	161060217	1969	*	136.772	Promoter	1	161040781	161059385	18605	2	81607	uc001fxo.2	0	1968
chr1	161067669	161068796	1128	*	41.9315	Promoter	1	161068151	161070138	1988	1	126823	uc001fxq.3	0	1127
chr1	161086930	161089295	2366	*	68.9897	Promoter	1	161087862	161090984	3123	1	4817	uc001fxv.2	0	2365
chr1	161101586	161103990	2405	*	215.961	Promoter	1	161090769	161102256	11488	2	9191	uc001fxz.3	0	2404
chr1	161122926	161124747	1822	*	214.243	Promoter	1	161123534	161128646	5113	1	51506	uc001fyd.4	0	1821
chr1	161128686	161129998	1313	*	160.75	Promoter	1	161129254	161135516	6263	1	27005	uc010pkc.2	0	1312
chr1	161146667	161147821	1155	*	62.2742	Promoter	1	161141100	161147758	6659	2	8703	uc001fyq.2	0	1154
chr1	161171493	161172851	1359	*	110.619	Promoter	1	161171937	161180839	8903	1	4720	uc010pki.2	0	1358
chr1	161283559	161284804	1246	*	105.616	Promoter	1	161284166	161334535	50370	1	6391	uc001gag.3	0	1245
chr1	161359320	161359888	569	*	49.3383	Distal Intergenic	1	161334521	161337673	3153	2	257177	uc001gal.4	-21647	568
chr1	161368059	161370392	2334	*	231.538	Exon (uc021pbx.1/uc021pbx.1, exon 1 of 1)	1	161334521	161337673	3153	2	257177	uc001gal.4	-30386	2333
chr1	161410010	161410683	674	*	67.5265	Exon (uc021pcb.1/uc021pcb.1, exon 1 of 1)	1	161475205	161489360	14156	1	2212	uc001gam.3	-64522	673
chr1	161417086	161417428	343	*	37.831	Exon (uc021pcf.1/uc021pcf.1, exon 1 of 1)	1	161475205	161489360	14156	1	2212	uc001gam.3	-57777	342
chr1	161417563	161418094	532	*	58.9913	Exon (uc021pch.1/uc021pch.1, exon 1 of 1)	1	161475205	161489360	14156	1	2212	uc001gam.3	-57111	531
chr1	161424970	161425505	536	*	57.2609	Exon (uc021pcm.1/uc021pcm.1, exon 1 of 1)	1	161475205	161489360	14156	1	2212	uc001gam.3	-49700	535
chr1	161432378	161432932	555	*	53.2448	Exon (uc021pcr.1/uc021pcr.1, exon 1 of 1)	1	161475205	161489360	14156	1	2212	uc001gam.3	-42273	554
chr1	161439755	161440224	470	*	49.724	Exon (uc021pcw.1/uc021pcw.1, exon 1 of 1)	1	161475205	161489360	14156	1	2212	uc001gam.3	-34981	469
chr1	161695871	161696855	985	*	70.3462	5' UTR	1	161695702	161697933	2232	1	127943	uc001gbn.4	169	984
chr1	161719419	161720220	802	*	215.961	Promoter	1	161719581	161726952	7372	1	11266	uc001gbo.3	0	801
chr1	161734355	161736686	2332	*	40.7223	Promoter	1	161736034	161835745	99712	1	22926	uc001gbq.2	0	2331
chr1	162039016	162040537	1522	*	53.1453	Promoter	1	162039581	162326974	287394	1	9722	uc010pkr.1	0	1521
chr1	162467347	162468232	886	*	107.619	Promoter	1	162467595	162499419	31825	1	127933	uc001gcc.2	0	885
chr1	162530378	162532088	1711	*	125.87	Promoter	1	162531296	162569633	38338	1	6675	uc001gce.4	0	1710
chr1	162759702	162761403	1702	*	89.9969	Promoter	1	162760496	162782608	22113	1	51478	uc001gci.3	0	1701
chr1	163290975	163292730	1756	*	77.245	Promoter	1	163291723	163325553	33831	1	83540	uc001gcq.1	0	1755
chr1	164095710	164096587	878	*	48.0842	Distal Intergenic	1	164528597	164821060	292464	1	5087	uc001gcs.3	-432010	877
chr1	164528362	164531634	3273	*	136.78	Promoter	1	164528597	164821060	292464	1	5087	uc001gcs.3	0	3272
chr1	164531718	164535223	3506	*	37.1599	Exon (uc001gcs.3/5087, exon 2 of 8)	1	164528597	164821060	292464	1	5087	uc010pkv.2	3121	3505
chr1	164556961	164561916	4956	*	70.3511	Promoter	1	164558766	164854300	295535	1	5087	uc010pkw.1	0	4955
chr1	164566050	164573906	7857	*	100.195	Intron (uc001gcs.3/5087, intron 2 of 7)	1	164558766	164854300	295535	1	5087	uc010pkw.1	7284	7856
chr1	164580035	164583299	3265	*	70.3511	Intron (uc001gcs.3/5087, intron 2 of 7)	1	164558766	164854300	295535	1	5087	uc010pkw.1	21269	3264
chr1	164715473	164719364	3892	*	70.3511	Intron (uc001gcs.3/5087, intron 2 of 7)	1	164738353	164743878	5526	2	100505795	uc021pdx.1	24514	3891
chr1	164740141	164742399	2259	*	59.6323	Exon (uc021pdx.1/100505795, exon 2 of 4)	1	164738353	164743878	5526	2	100505795	uc021pdx.1	1479	2258
chr1	165130226	165133140	2915	*	73.0915	Distal Intergenic	1	165171104	165182292	11189	2	4009	uc021pdy.1	49152	2914
chr1	165599423	165601651	2229	*	73.0915	Promoter	1	165600110	165625372	25263	1	4259	uc001gdf.3	0	2228
chr1	165667101	165668228	1128	*	94.3389	Promoter	1	165631449	165667823	36375	2	223	uc010pky.1	0	1127
chr1	165737548	165739154	1607	*	115.151	Promoter	1	165693528	165738159	44632	2	54499	uc001gdj.5	0	1606
chr1	165796408	165798922	2515	*	124.327	Promoter	1	165693528	165796992	103465	2	54499	uc001gdn.4	0	2514
chr1	166807892	166810321	2430	*	203.038	Promoter	1	166808724	166819948	11225	1	57645	uc010ple.1	0	2429
chr1	166844563	166846109	1547	*	416.64	Promoter	1	166825749	166845654	19906	2	117143	uc001gdw.3	0	1546
chr1	167188555	167191958	3404	*	170.095	Promoter	1	167190066	167365664	175599	1	5451	uc010plg.2	0	3403
chr1	167522397	167523134	738	*	62.2742	Promoter	1	167510251	167523056	12806	2	8804	uc001gel.3	0	737
chr1	167683341	167684024	684	*	91.4393	Exon (uc021pej.1/uc021pej.1, exon 1 of 1)	1	167691187	167743133	51947	1	9019	uc001gen.4	-7163	683
chr1	167690568	167691970	1403	*	51.8651	Promoter	1	167691187	167743133	51947	1	9019	uc001gen.4	0	1402
chr1	167904768	167907270	2503	*	222.859	Promoter	1	167885913	167905439	19527	2	25874	uc001ges.3	0	2502
chr1	168025424	168025833	410	*	44.5774	Intron (uc001gev.3/55827, intron 15 of 19)	1	168011968	168045083	33116	1	55827	uc001gez.3	13456	409
chr1	168147625	168149089	1465	*	132.082	Promoter	1	168148171	168161633	13463	1	261726	uc001gff.3	0	1464
chr1	168194650	168195923	1274	*	66.2849	Promoter	1	168195255	168212088	16834	1	375035	uc001gfi.4	0	1273
chr1	168874599	168877821	3223	*	149.14	Distal Intergenic	1	168756179	168762126	5948	1	79100	uc001gfq.3	118420	3222
chr1	169074658	169079304	4647	*	303.033	Promoter	1	169075947	169101960	26014	1	481	uc001gfr.1	0	4646
chr1	169336595	169338267	1673	*	162.927	Promoter	1	169101769	169337186	235418	2	29922	uc001gft.3	0	1672
chr1	169452778	169456425	3648	*	357.793	Promoter	1	169433149	169455208	22060	2	10560	uc001gge.4	0	3647
chr1	169496778	169499524	2747	*	128.683	Exon (uc001ggg.1/2153, exon 16 of 25)	1	169433149	169455208	22060	2	10560	uc001ggf.4	-41570	2746
chr1	169747860	169751885	4026	*	197.611	Intron (uc001ggj.3/55732, intron 3 of 28)	1	169763871	169773526	9656	1	55732	uc001ggo.3	-11986	4025
chr1	169763236	169764947	1712	*	326.825	Promoter	1	169763871	169773526	9656	1	55732	uc001ggo.3	0	1711
chr1	169859287	169864065	4779	*	464.715	Promoter	1	169822215	169863100	40886	2	57147	uc001ggs.3	0	4778
chr1	170500364	170502220	1857	*	250.836	Promoter	1	170501263	170508708	7446	1	92344	uc009wvw.2	0	1856
chr1	171341971	171343237	1267	*	135.118	Distal Intergenic	1	171308035	171310463	2429	1	7151	uc010pmf.2	33936	1266
chr1	171453968	171455850	1883	*	350.675	Promoter	1	171454666	171484998	30333	1	23215	uc001ghq.1	0	1882
chr1	171710311	171712199	1889	*	203.038	Promoter	1	171669296	171711379	42084	2	8674	uc001ghw.2	0	1888
chr1	171749554	171751703	2150	*	154.117	Promoter	1	171750761	171766856	16096	1	51603	uc001ghz.3	0	2149
chr1	172024856	172025596	741	*	33.4865	Intron (uc001gid.5/26052, intron 10 of 14)	1	172107948	172108028	81	1	100422882	uc021pew.1	-82352	740
chr1	172412679	172413373	695	*	177.176	Promoter	1	172362274	172413230	50957	2	5279	uc001gii.1	0	694
chr1	172501013	172503314	2302	*	346.286	Promoter	1	172502260	172572423	70164	1	51430	uc010pmm.1	0	2301
chr1	173445601	173446279	679	*	192.894	Promoter	1	173204199	173446294	242096	2	100506023	uc001gix.1	15	678
chr1	173446372	173447919	1548	*	382.969	Promoter	1	173446486	173457946	11461	1	9588	uc001giy.1	0	1547
chr1	173683490	173685203	1714	*	184.921	Promoter	1	173684080	173755840	71761	1	27252	uc001gjc.3	0	1713
chr1	173792687	173795060	2374	*	227.529	Promoter	1	173793797	173827682	33886	1	55157	uc001gjh.2	0	2373
chr1	173835582	173838872	3291	*	416.843	Promoter	1	173833039	173837125	4087	2	60674	uc001gjj.3	0	3290
chr1	173989860	173992238	2379	*	320.181	Distal Intergenic	1	173907795	173962210	54416	2	149041	uc010pmt.2	-27650	2378
chr1	174127840	174129542	1703	*	140.894	Promoter	1	174128552	174363283	234732	1	9910	uc009wwq.2	0	1702
chr1	174207412	174209694	2283	*	154.191	Intron (uc009wwq.2/9910, intron 4 of 12)	1	174219613	174515050	295438	1	9910	uc001gjy.3	-9919	2282
chr1	174967704	174970216	2513	*	497.883	Promoter	1	174968571	174981163	12593	1	27101	uc001gki.1	0	2512
chr1	174991914	174993310	1397	*	126.532	Promoter	1	174982094	174992591	10498	2	63931	uc001gkk.3	0	1396
chr1	175160863	175162857	1995	*	81.7748	Promoter	1	175126123	175161949	35827	2	9674	uc001gkn.3	0	1994
chr1	176175257	176177669	2413	*	331.879	Promoter	1	175913967	176176370	262404	2	64326	uc001gku.1	0	2412
chr1	177553218	177554753	1536	*	121.726	Distal Intergenic	1	177225996	177251558	25563	1	57795	uc001glg.3	327222	1535
chr1	178062394	178063957	1564	*	128.324	Promoter	1	178060643	178062735	2093	2	100302401	uc001gln.1	0	1563
chr1	178511038	178513089	2052	*	169.989	Promoter	1	178511931	178518024	6094	1	400798	uc001glx.1	0	2051
chr1	178623607	178627538	3932	*	109.117	Distal Intergenic	1	178646884	178646969	86	1	100616328	uc021pfg.1	-19346	3931
chr1	178693775	178696194	2420	*	284.857	Promoter	1	178694300	178848923	154624	1	55103	uc001gly.1	0	2419
chr1	178994372	178996247	1876	*	453.136	Promoter	1	178995074	179045702	50629	1	9917	uc001gmc.3	0	1875
chr1	179050275	179052356	2082	*	266.705	Promoter	1	179051112	179065129	14018	1	64222	uc001gmd.3	0	2081
chr1	179103443	179103943	501	*	59.6056	Intron (uc001gmg.4/27, intron 1 of 12)	1	179068462	179112224	43763	2	27	uc001gmg.4	8281	500
chr1	179198026	179199376	1351	*	169.055	Promoter	1	179068462	179198819	130358	2	27	uc001gmj.4	0	1350
chr1	179334265	179335666	1402	*	224.613	Promoter	1	179334855	179437852	102998	1	126859	uc001gmn.2	0	1401
chr1	179560336	179561759	1424	*	167.57	Promoter	1	179560748	179660407	99660	1	163589	uc021pfm.1	0	1423
chr1	179850346	179852947	2602	*	426.476	Promoter	1	179851177	179889212	38036	1	26092	uc001gnp.2	0	2601
chr1	179922833	179924798	1966	*	397.497	Promoter	1	179923908	179966310	42403	1	9857	uc001gnr.1	0	1965
chr1	180123069	180124870	1802	*	203.614	Promoter	1	180123968	180167169	43202	1	5768	uc001gny.3	0	1801
chr1	180135679	180138165	2487	*	66.2688	Exon (uc001gny.3/5768, exon 2 of 13)	1	180123968	180167169	43202	1	5768	uc001gnz.3	11711	2486
chr1	180470153	180472818	2666	*	412.446	Promoter	1	180257352	180472022	214671	2	84320	uc001gog.3	0	2665
chr1	180601088	180602008	921	*	114.149	Promoter	1	180601146	180805872	204727	1	9213	uc009wxm.2	0	920
chr1	180922412	180923763	1352	*	164.545	Intron (uc009wxo.1/uc009wxo.1, intron 1 of 1)	1	180897566	180919922	22357	1	57710	uc001gom.1	24846	1351
chr1	180990861	180992887	2027	*	306.064	Promoter	1	180942176	180992046	49871	2	10228	uc010pnr.2	0	2026
chr1	181057134	181060431	3298	*	380.097	Promoter	1	181057638	181059979	2342	1	51278	uc001got.4	0	3297
chr1	181073092	181074554	1463	*	399.831	Distal Intergenic	1	181057638	181059979	2342	1	51278	uc001got.4	15454	1462
chr1	181074655	181075660	1006	*	69.1689	Distal Intergenic	1	181057638	181059979	2342	1	51278	uc001got.4	17017	1005
chr1	181080848	181083077	2230	*	99.371	Distal Intergenic	1	181057638	181059979	2342	1	51278	uc001got.4	23210	2229
chr1	181085204	181090485	5282	*	265.983	Distal Intergenic	1	181057638	181059979	2342	1	51278	uc001got.4	27566	5281
chr1	181095029	181097523	2495	*	78.2004	Distal Intergenic	1	181057638	181059979	2342	1	51278	uc001got.4	37391	2494
chr1	181102684	181105451	2768	*	240.234	Distal Intergenic	1	181057638	181059979	2342	1	51278	uc001got.4	45046	2767
chr1	181998190	181999543	1354	*	135.21	Distal Intergenic	1	182023705	182030847	7143	2	127665	uc001goz.3	31304	1353
chr1	182149634	182151694	2061	*	60.95	Distal Intergenic	1	182023705	182030847	7143	2	127665	uc001goz.3	-118787	2060
chr1	182359428	182361756	2329	*	269.969	Promoter	1	182350839	182360539	9701	2	2752	uc001gpa.2	0	2328
chr1	182557804	182558545	742	*	131.201	Promoter	1	182542769	182558394	15626	2	6041	uc009wxz.2	0	741
chr1	182569356	182574044	4689	*	153.257	Promoter	1	182567758	182573548	5791	2	6004	uc001gpl.4	0	4688
chr1	182601689	182604246	2558	*	65.447	Distal Intergenic	1	182584275	182585764	1490	1	284648	uc021pfy.1	17414	2557
chr1	182807980	182810122	2143	*	394.284	Promoter	1	182808439	182857117	48679	1	1660	uc001gpr.3	0	2142
chr1	182991733	182993276	1544	*	42.1228	Promoter	1	182992595	183074191	81597	1	3915	uc001gpx.3	0	1543
chr1	183439466	183442503	3038	*	437.055	Promoter	1	183430011	183441117	11107	2	284649	uc001gqe.3	0	3037
chr1	183603936	183605070	1135	*	177.176	Promoter	1	183595328	183605076	9749	2	10092	uc001gql.4	6	1134
chr1	183627004	183627738	735	*	94.4073	Intron (uc010pof.1/23179, intron 1 of 11)	1	183615411	183622448	7038	2	403314	uc001gqn.3	-4556	734
chr1	184020301	184021583	1283	*	182.547	Promoter	1	184020811	184043344	22534	1	116461	uc001gqt.4	0	1282
chr1	184124112	184127055	2944	*	61.7631	Distal Intergenic	1	184020811	184043344	22534	1	116461	uc009wyg.3	103301	2943
chr1	184355213	184357772	2560	*	202.012	Promoter	1	184356150	184598155	242006	1	81563	uc001gqv.1	0	2559
chr1	184386784	184389822	3039	*	65.1653	Intron (uc001gqv.1/81563, intron 1 of 5)	1	184356150	184598155	242006	1	81563	uc001gqv.1	30634	3038
chr1	184394217	184395249	1033	*	47.6495	Intron (uc001gqv.1/81563, intron 1 of 5)	1	184356150	184598155	242006	1	81563	uc001gqv.1	38067	1032
chr1	184723006	184724763	1758	*	256.657	Promoter	1	184659625	184724041	64417	2	80267	uc010pok.2	0	1757
chr1	185014473	185015513	1041	*	59.6726	Promoter	1	185014551	185071740	57190	1	6045	uc001grc.1	0	1040
chr1	185125306	185127094	1789	*	316.806	Promoter	1	185126192	185260913	134722	1	54823	uc001grg.4	0	1788
chr1	185285111	185287582	2472	*	287.667	Promoter	1	185265522	185286461	20940	2	10625	uc001grl.3	0	2471
chr1	186118562	186125458	6897	*	269.301	Exon (uc001grq.1/83872, exon 94 of 107)	1	186097210	186160085	62876	1	83872	uc001grs.1	21352	6896
chr1	186343394	186345965	2572	*	260.355	Promoter	1	186344890	186390503	45614	1	54953	uc021pgg.1	0	2571
chr1	188458595	188461318	2724	*	68.0615	Distal Intergenic	1	186798032	186958113	160082	1	5321	uc010pos.2	1660563	2723
chr1	188559578	188564402	4825	*	57.3502	Distal Intergenic	1	186798032	186958113	160082	1	5321	uc010pos.2	1761546	4824
chr1	188674283	188677613	3331	*	50.24	Distal Intergenic	1	190066797	190444942	378146	2	339479	uc010pot.1	1767329	3330
chr1	188680221	188685107	4887	*	89.7036	Distal Intergenic	1	190066797	190444942	378146	2	339479	uc010pot.1	1759835	4886
chr1	188737317	188740279	2963	*	190.496	Distal Intergenic	1	190066797	190444942	378146	2	339479	uc010pot.1	1704663	2962
chr1	191670215	191672632	2418	*	34.0352	Distal Intergenic	1	192127592	192154945	27354	1	64407	uc001gsg.3	-454960	2417
chr1	193027176	193030066	2891	*	241.317	Promoter	1	192981496	193028523	47028	2	51377	uc001gsm.3	0	2890
chr1	193073244	193075642	2399	*	234.517	Promoter	1	193065595	193074608	9014	2	51022	uc001gsz.2	0	2398
chr1	193090490	193092626	2137	*	263.143	Promoter	1	193091088	193223942	132855	1	79577	uc001gtb.3	0	2136
chr1	197115008	197116653	1646	*	191.843	Promoter	1	197053257	197115824	62568	2	259266	uc001gtu.3	0	1645
chr1	197169507	197171559	2053	*	304.639	Promoter	1	197170592	197447585	276994	1	23418	uc010poz.2	0	2052
chr1	197743545	197745191	1647	*	143.82	Promoter	1	197473879	197744623	270745	2	163486	uc010ppf.2	0	1646
chr1	197871043	197872429	1387	*	388.553	Promoter	1	197871682	197876497	4816	1	388722	uc001guh.3	0	1386
chr1	198125448	198127262	1815	*	375.354	Promoter	1	198126108	198291548	165441	1	140609	uc001gun.4	0	1814
chr1	198127420	198128948	1529	*	92.6612	Intron (uc001gun.4/140609, intron 1 of 9)	1	198126128	198291548	165421	1	140609	uc021pgx.1	1292	1528
chr1	198903875	198906660	2786	*	71.5175	Promoter	1	198777132	198906558	129427	2	100131234	uc021pgz.1	0	2785
chr1	200378500	200379669	1170	*	133.83	Promoter	1	200375420	200379166	3747	2	23528	uc001gve.3	0	1169
chr1	200589178	200590848	1671	*	162.234	Promoter	1	200520625	200589862	69238	2	9928	uc010ppk.1	0	1670
chr1	200637776	200639981	2206	*	477.937	Promoter	1	200610119	200639126	29008	2	83479	uc010ppl.1	0	2205
chr1	200707417	200709443	2027	*	506.955	Promoter	1	200708686	200829831	121146	1	23271	uc001gvk.3	0	2026
chr1	200860078	200860765	688	*	75.7214	Promoter	1	200860627	200884864	24238	1	55765	uc001gvo.4	0	687
chr1	201083099	201084241	1143	*	214.642	3' UTR	1	201083081	201084500	1420	2	647219	uc031prl.1	259	1142
chr1	201122643	201124392	1750	*	266.773	Promoter	1	201103900	201123568	19669	2	252839	uc001gvx.3	0	1749
chr1	201139997	201140887	891	*	108.045	Promoter	1	201103900	201140702	36803	2	252839	uc001gwa.3	0	890
chr1	201276114	201279282	3169	*	118.469	Intron (uc001gwd.3/5317, intron 2 of 14)	1	201252580	201302121	49542	1	5317	uc009wzm.3	23534	3168
chr1	201348802	201351203	2402	*	112.406	3' UTR	1	201328136	201346828	18693	2	7139	uc009wzt.2	-1974	2401
chr1	201367818	201369192	1375	*	127.304	Promoter	1	201349966	201368669	18704	2	3898	uc001gwm.3	0	1374
chr1	201428688	201432361	3674	*	198.309	Downstream (2-3kb)	1	201434607	201438299	3693	2	23612	uc001gwq.4	5938	3673
chr1	201436800	201438903	2104	*	485.168	Promoter	1	201434607	201438299	3693	2	23612	uc001gwq.4	0	2103
chr1	201449045	201450831	1787	*	49.8367	Downstream (1-2kb)	1	201434607	201438299	3693	2	23612	uc031prm.1	-10746	1786
chr1	201474013	201477227	3215	*	252.968	Promoter	1	201452658	201475967	23310	2	1465	uc021phh.1	0	3214
chr1	201480397	201482282	1886	*	142.046	Distal Intergenic	1	201455286	201476387	21102	2	1465	uc010pps.2	-4010	1885
chr1	201566172	201567766	1595	*	61.3225	Distal Intergenic	1	201617450	201796102	178653	1	89796	uc001gwu.3	-49684	1594
chr1	201618864	201620089	1226	*	86.1013	Intron (uc001gwu.3/89796, intron 1 of 28)	1	201617450	201796102	178653	1	89796	uc021phi.1	1414	1225
chr1	201707771	201712117	4347	*	478.054	Promoter	1	201708654	201772842	64189	1	89796	uc001gwv.1	0	4346
chr1	201798204	201798858	655	*	151.069	Promoter	1	201798288	201853422	55135	1	55705	uc001gwz.3	0	654
chr1	201923672	201925343	1672	*	141.511	Promoter	1	201924619	201939789	15171	1	10440	uc001gxc.3	0	1671
chr1	201951738	201952851	1114	*	159.128	Promoter	1	201951766	201975275	23510	1	6051	uc001gxd.3	0	1113
chr1	201976083	201985361	9279	*	140.094	Promoter	1	201977073	201986315	9243	1	1999	uc001gxg.4	0	9278
chr1	201986149	201993824	7676	*	409.572	3' UTR	1	201979690	201986315	6626	1	1999	uc001gxi.4	6459	7675
chr1	202002864	202006439	3576	*	218.124	Distal Intergenic	1	201979690	201986315	6626	1	1999	uc001gxi.4	23174	3575
chr1	202013070	202018458	5389	*	317.591	Distal Intergenic	1	201979690	201986315	6626	1	1999	uc001gxi.4	33380	5388
chr1	202024436	202029814	5379	*	316.79	Distal Intergenic	1	201979690	201986315	6626	1	1999	uc001gxi.4	44746	5378
chr1	202049609	202058247	8639	*	388.399	Distal Intergenic	1	202092029	202098634	6606	1	9283	uc001gxj.3	-33782	8638
chr1	202073660	202079413	5754	*	225.98	Distal Intergenic	1	202092029	202098634	6606	1	9283	uc001gxj.3	-12616	5753
chr1	202080859	202084181	3323	*	67.8305	Distal Intergenic	1	202092029	202098634	6606	1	9283	uc001gxj.3	-7848	3322
chr1	202099871	202103202	3332	*	102.785	3' UTR	1	202092029	202098634	6606	1	9283	uc001gxj.3	7842	3331
chr1	202112356	202114343	1988	*	150.441	Promoter	1	202102532	202113871	11340	2	127829	uc001gxk.2	0	1987
chr1	202309967	202311989	2023	*	266.002	Promoter	1	202300785	202311094	10310	2	29089	uc001gxx.4	0	2022
chr1	202317667	202318706	1040	*	198.18	Promoter	1	202317830	202407370	89541	1	4660	uc001gxy.3	0	1039
chr1	202775427	202777778	2352	*	356.118	Promoter	1	202696532	202777549	81018	2	10765	uc001gyf.3	0	2351
chr1	202779336	202782305	2970	*	211.001	Promoter	1	202780074	202781041	968	1	100506696	uc031prp.1	0	2969
chr1	202804094	202806562	2469	*	45.7853	Distal Intergenic	1	202794329	202795421	1093	1	641515	uc021php.1	9765	2468
chr1	202829084	202831292	2209	*	314.782	Promoter	1	202830882	202844369	13488	1	148709	uc001gyk.1	0	2208
chr1	202856588	202858774	2187	*	405.045	Promoter	1	202847410	202858385	10976	2	5877	uc001gyl.3	0	2186
chr1	202895135	202897063	1929	*	316.939	Promoter	1	202860230	202896371	36142	2	59349	uc001gyo.1	0	1928
chr1	202926646	202928128	1483	*	328.315	Promoter	1	202909960	202927524	17565	2	51094	uc001gyq.5	0	1482
chr1	202975384	202977695	2312	*	369.708	Promoter	1	202955580	202976393	20814	2	401980	uc021phr.1	0	2311
chr1	202995019	202996192	1174	*	78.1112	Distal Intergenic	1	203003612	203047864	44253	1	8497	uc009xaj.3	-7420	1173
chr1	203273956	203275911	1956	*	300.184	Promoter	1	203267886	203274453	6568	2	730227	uc001gzp.2	0	1955
chr1	203284363	203285830	1468	*	91.124	Distal Intergenic	1	203274664	203278729	4066	1	7832	uc001gzq.3	9699	1467
chr1	203286070	203286865	796	*	44.1161	Distal Intergenic	1	203274664	203278729	4066	1	7832	uc001gzq.3	11406	795
chr1	203295385	203297704	2320	*	480.778	Distal Intergenic	1	203274664	203278729	4066	1	7832	uc001gzq.3	20721	2319
chr1	203456364	203457432	1069	*	53.7106	3' UTR	1	203463271	203478077	14807	1	26254	uc001gzu.1	-5839	1068
chr1	203595435	203596632	1198	*	106.526	Promoter	1	203595915	203713209	117295	1	493	uc001gzv.3	0	1197
chr1	203764284	203765919	1636	*	398.39	Promoter	1	203764751	203823256	58506	1	9877	uc001hac.3	0	1635
chr1	203829957	203831906	1950	*	360.572	Promoter	1	203830727	203840280	9554	1	6635	uc010pqn.3	0	1949
chr1	204042106	204044333	2228	*	261.61	Promoter	1	204042246	204088974	46729	1	9580	uc001hal.3	0	2227
chr1	204048703	204050397	1695	*	46.7492	Intron (uc001hal.3/9580, intron 1 of 6)	1	204042246	204096871	54626	1	9580	uc001ham.3	6457	1694
chr1	204072381	204074467	2087	*	66.0157	Intron (uc001hal.3/9580, intron 1 of 6)	1	204082043	204096871	14829	1	9580	uc010pqp.2	-7576	2086
chr1	204098002	204101921	3920	*	108.399	3' UTR	1	204085193	204096871	11679	1	9580	uc010pqq.2	12809	3919
chr1	204182498	204184027	1530	*	86.4218	Promoter	1	204167288	204183220	15933	2	127845	uc001has.1	0	1529
chr1	204254632	204257930	3299	*	260.181	Intron (uc001hau.4/22874, intron 1 of 22)	1	204218312	204226997	8686	2	22874	uc009xbc.1	-27635	3298
chr1	204283049	204283784	736	*	44.8948	Intron (uc001hau.4/22874, intron 1 of 22)	1	204187979	204329057	141079	2	22874	uc001hau.4	45273	735
chr1	204332095	204333400	1306	*	128.146	Distal Intergenic	1	204187979	204329057	141079	2	22874	uc001hau.4	-3038	1305
chr1	204377681	204382562	4882	*	445.822	Promoter	1	204372492	204380944	8453	2	84919	uc001hav.4	0	4881
chr1	204384693	204389997	5305	*	344.71	Downstream (1-2kb)	1	204372492	204380944	8453	2	84919	uc001hav.4	-3749	5304
chr1	204411514	204413315	1802	*	48.6377	Exon (uc001haw.3/5287, exon 19 of 34)	1	204372492	204380944	8453	2	84919	uc001hav.4	-30570	1801
chr1	204447965	204450172	2208	*	33.7053	Intron (uc001haw.3/5287, intron 2 of 33)	1	204391758	204459474	67717	2	5287	uc001haw.3	9302	2207
chr1	204462251	204464463	2213	*	345.085	Promoter	1	204423601	204463852	40252	2	5287	uc001hax.1	0	2212
chr1	204475799	204477622	1824	*	147.759	Exon (uc021phw.1/uc021phw.1, exon 1 of 1)	1	204485507	204518786	33280	1	4194	uc010pqw.2	-7885	1823
chr1	204484711	204486718	2008	*	444.429	Promoter	1	204485507	204518786	33280	1	4194	uc010pqw.2	0	2007
chr1	205090220	205092091	1872	*	436.698	Promoter	1	205055270	205091150	35881	2	5929	uc001hbu.2	0	1871
chr1	205179806	205181026	1221	*	313.168	Promoter	1	205111631	205180727	69097	2	25778	uc001hbw.3	0	1220
chr1	205290174	205291223	1050	*	95.5437	Promoter	1	205271191	205290883	19693	2	81788	uc001hce.3	0	1049
chr1	205416665	205419922	3258	*	129.444	Promoter	1	205417430	205417526	97	2	442891	uc010prh.1	0	3257
chr1	205446066	205448529	2464	*	261.319	Distal Intergenic	1	205473684	205492843	19160	1	5129	uc009xbk.2	-25155	2463
chr1	205473211	205475144	1934	*	226.245	Promoter	1	205473684	205492843	19160	1	5129	uc009xbk.2	0	1933
chr1	205511992	205513744	1753	*	88.6362	Distal Intergenic	1	205523401	205525763	2363	2	284578	uc001hcu.2	12019	1752
chr1	205599276	205601849	2574	*	336.641	5' UTR	1	205566695	205602000	35306	2	2005	uc021pid.1	151	2573
chr1	205717049	205720242	3194	*	523.929	Promoter	1	205681947	205719372	37426	2	64710	uc001hdb.3	0	3193
chr1	205781635	205783164	1530	*	170.513	Promoter	1	205758221	205782161	23941	2	254428	uc001hdh.1	0	1529
chr1	206135383	206138066	2684	*	154.144	Distal Intergenic	1	206138911	206155074	16164	1	729533	uc001hdr.4	-845	2683
chr1	206138393	206139763	1371	*	128.443	Promoter	1	206138911	206155074	16164	1	729533	uc001hdr.4	0	1370
chr1	206620935	206623257	2323	*	44.8233	Intron (uc010prt.1/23380, intron 15 of 17)	1	206643586	206651640	8055	1	9641	uc009xbu.2	-20329	2322
chr1	206785031	206786397	1367	*	194.825	Promoter	1	206764974	206785904	20931	2	1939	uc001heh.2	0	1366
chr1	206858154	206859949	1796	*	143.598	Promoter	1	206858365	206907630	49266	1	9261	uc001hel.2	0	1795
chr1	207068086	207070766	2681	*	88.4797	Promoter	1	207070788	207077484	6697	1	11009	uc001hes.2	-22	2680
chr1	207082032	207083774	1743	*	94.878	Exon (uc001hey.3/9214, exon 5 of 8)	1	207070788	207077484	6697	1	11009	uc001hex.2	11244	1742
chr1	207225700	207227115	1416	*	59.8323	Promoter	1	207226620	207251162	24543	1	5208	uc001hfg.3	0	1415
chr1	207488144	207493358	5215	*	253.711	Distal Intergenic	1	207494817	207534311	39495	1	1604	uc001hfq.4	-1459	5214
chr1	207493769	207496126	2358	*	394.901	Promoter	1	207494817	207534311	39495	1	1604	uc001hfq.4	0	2357
chr1	207923906	207926939	3034	*	168.907	Promoter	1	207925383	207968861	43479	1	4179	uc001hgc.3	0	3033
chr1	207995881	207998075	2195	*	64.9417	Exon (uc010psi.2/148696, exon 1 of 1)	1	207991724	207995941	4218	1	148696	uc010psi.2	4157	2194
chr1	208041808	208042779	972	*	66.2849	Exon (uc001hgu.2/uc001hgu.2, exon 1 of 2)	1	208059883	208063837	3955	2	947	uc001hgv.1	21058	971
chr1	208136484	208137465	982	*	103.145	Distal Intergenic	1	208059883	208084683	24801	2	947	uc010psj.1	-51801	981
chr1	209957373	209958653	1281	*	58.3212	Promoter	1	209955662	209957890	2229	2	148304	uc001hhp.1	0	1280
chr1	209978955	209980098	1144	*	34.8282	Promoter	1	209958968	209979520	20553	2	3664	uc001hhq.2	0	1143
chr1	210405584	210407904	2321	*	250.848	Promoter	1	210406195	210416440	10246	1	56256	uc001hhy.3	0	2320
chr1	210501751	210503127	1377	*	164.003	Promoter	1	210502250	210849638	347389	1	55733	uc001hhz.4	0	1376
chr1	210547180	210547986	807	*	77.245	Intron (uc009xcx.3/55733, intron 3 of 11)	1	210516626	210849638	333013	1	55733	uc010psu.2	30554	806
chr1	211430736	211434969	4234	*	292.116	Promoter	1	211432708	211486303	53596	1	55758	uc010psv.1	0	4233
chr1	211499779	211501279	1501	*	63.6048	Promoter	1	211499957	211548286	48330	1	7188	uc001hih.3	0	1500
chr1	211555585	211557160	1576	*	197.211	Promoter	1	211556097	211605877	49781	1	84791	uc001hil.4	0	1575
chr1	211589469	211590458	990	*	48.0842	Intron (uc001hil.4/84791, intron 4 of 5)	1	211556097	211605877	49781	1	84791	uc001hil.4	33372	989
chr1	211750283	211753475	3193	*	235.028	Promoter	1	211748381	211752099	3719	2	7779	uc001hio.1	0	3192
chr1	211848067	211849592	1526	*	44.3649	Promoter	1	211831599	211848972	17374	2	4751	uc021piq.1	0	1525
chr1	212003306	212004582	1277	*	130.523	Promoter	1	211916799	212003577	86779	2	9926	uc001hiu.3	0	1276
chr1	212207734	212209685	1952	*	136.78	Promoter	1	212113741	212209002	95262	2	25896	uc001hiw.2	0	1951
chr1	212319485	212322256	2772	*	78.6407	Distal Intergenic	1	212250955	212251027	73	1	100422947	uc021pis.1	68530	2771
chr1	212456975	212460416	3442	*	288.483	Promoter	1	212458879	212535205	76327	1	5525	uc001hjb.3	0	3441
chr1	212731503	212732795	1293	*	152.674	Distal Intergenic	1	212738676	212794119	55444	1	467	uc001hjf.3	-5881	1292
chr1	212782059	212782720	662	*	32.5344	Promoter	1	212781970	212794119	12150	1	467	uc021piu.1	89	661
chr1	212964710	212966068	1359	*	63.6002	Promoter	1	212965170	212990167	24998	1	128387	uc001hjo.2	0	1358
chr1	213030752	213032341	1590	*	89.9969	Promoter	1	213031597	213072705	41109	1	28982	uc001hjt.3	0	1589
chr1	213188127	213189774	1648	*	94.3389	Promoter	1	213165524	213188820	23297	2	90806	uc010pto.2	0	1647
chr1	213224154	213225124	971	*	57.0169	Promoter	1	213224588	213234869	10282	1	26750	uc009xdh.3	0	970
chr1	214453614	214455394	1781	*	143.095	Promoter	1	214454565	214504413	49849	1	56950	uc021piw.1	0	1780
chr1	214724326	214725883	1558	*	81.4483	Promoter	1	214522039	214725024	202986	2	5784	uc001hkk.2	0	1557
chr1	214776115	214777470	1356	*	46.8377	Promoter	1	214776532	214837914	61383	1	1063	uc001hkm.3	0	1355
chr1	215255472	215258644	3173	*	290.74	Promoter	1	215256560	215368435	111876	1	3776	uc010pua.1	0	3172
chr1	215285874	215291331	5458	*	218.899	Intron (uc001hko.3/3776, intron 2 of 6)	1	215256560	215410436	153877	1	3776	uc001hkr.4	29314	5457
chr1	215337996	215340434	2439	*	83.9589	Intron (uc001hko.3/3776, intron 3 of 6)	1	215256560	215410436	153877	1	3776	uc001hkr.4	81436	2438
chr1	215439492	215442744	3253	*	55.7429	Distal Intergenic	1	215256560	215410436	153877	1	3776	uc001hkr.4	182932	3252
chr1	215595582	215600630	5049	*	90.318	Distal Intergenic	1	215740735	215795149	54415	1	51133	uc001hks.3	-140105	5048
chr1	215644519	215658353	13835	*	410.713	Distal Intergenic	1	215740735	215795149	54415	1	51133	uc001hks.3	-82382	13834
chr1	215658554	215666835	8282	*	285.189	Distal Intergenic	1	215740735	215795149	54415	1	51133	uc001hks.3	-73900	8281
chr1	215688800	215693554	4755	*	152.516	Distal Intergenic	1	215740735	215795149	54415	1	51133	uc001hks.3	-47181	4754
chr1	215739877	215743977	4101	*	406.654	Promoter	1	215740735	215795149	54415	1	51133	uc001hks.3	0	4100
chr1	217746779	217748922	2144	*	40.868	Intron (uc001hlf.1/55105, intron 5 of 9)	1	217603834	217804409	200576	2	55105	uc001hlf.1	55487	2143
chr1	217803639	217805228	1590	*	393.802	Promoter	1	217804695	217955664	150970	1	128153	uc009xdr.1	0	1589
chr1	217869359	217870613	1255	*	64.6697	Intron (uc009xdr.1/128153, intron 6 of 10)	1	217804695	218040484	235790	1	128153	uc001hlh.1	64664	1254
chr1	217884931	217887742	2812	*	83.264	Intron (uc009xdr.1/128153, intron 6 of 10)	1	217804695	218040484	235790	1	128153	uc001hlh.1	80236	2811
chr1	218125491	218128518	3028	*	80.4952	Distal Intergenic	1	218066242	218094146	27905	1	100885798	uc031psc.1	59249	3027
chr1	218457874	218459238	1365	*	116.886	Promoter	1	218458629	218511325	52697	1	51018	uc001hlj.3	0	1364
chr1	218652819	218655960	3142	*	92.5444	Distal Intergenic	1	218517538	218519020	1483	2	728463	uc031psd.1	-133799	3141
chr1	219346888	219348014	1127	*	188.909	Promoter	1	219347192	219386207	39016	1	127018	uc001hlq.4	0	1126
chr1	219786194	219786563	370	*	40.7223	Distal Intergenic	1	220046619	220292777	246159	1	26828	uc021pjd.1	-260056	369
chr1	220218730	220220909	2180	*	146.669	Promoter	1	220141942	220220000	78059	2	2058	uc001hly.1	0	2179
chr1	220267265	220268611	1347	*	235.449	Promoter	1	220267455	220321383	53929	1	55699	uc001hmc.3	0	1346
chr1	220444901	220446386	1486	*	148.965	Promoter	1	220321610	220445843	124234	2	25782	uc001hmf.2	0	1485
chr1	220959996	220960855	860	*	66.2849	Promoter	1	220960039	220987741	27703	1	64757	uc001hms.3	0	859
chr1	221915688	221917034	1347	*	80.4357	Distal Intergenic	1	221874764	221915516	40753	2	11221	uc001hmz.2	-172	1346
chr1	222638460	222639545	1086	*	71.4354	Distal Intergenic	1	222695602	222721444	25843	2	79802	uc001hnh.1	81899	1085
chr1	222762570	222764070	1501	*	133.644	Promoter	1	222731244	222763275	32032	2	9015	uc001hni.2	0	1500
chr1	222791404	222792144	741	*	80.0418	Promoter	1	222791444	222841351	49908	1	375056	uc001hnl.3	0	740
chr1	222816933	222818452	1520	*	249.081	Promoter	1	222817664	222841351	23688	1	375056	uc001hnm.3	0	1519
chr1	222884811	222887382	2572	*	467.248	Promoter	1	222885906	222887245	1340	1	148362	uc001hnp.1	0	2571
chr1	222987920	222989196	1277	*	166.524	Promoter	1	222988431	223179337	190907	1	84976	uc001hnu.2	0	1276
chr1	223307073	223308526	1454	*	192.098	Promoter	1	223282748	223308206	25459	2	7100	uc001hnv.2	0	1453
chr1	223315733	223317120	1388	*	73.2516	Promoter	1	223282748	223316624	33877	2	7100	uc001hnw.2	0	1387
chr1	223536337	223538370	2034	*	59.6323	Promoter	1	223394161	223537401	143241	2	55061	uc001hnx.3	0	2033
chr1	223616789	223619271	2483	*	100.63	Distal Intergenic	1	223566715	223568812	2098	1	164127	uc001hoa.2	50074	2482
chr1	223743130	223745910	2781	*	113.636	Intron (uc009xee.2/388743, intron 10 of 17)	1	223714972	223853436	138465	2	388743	uc009xee.2	107526	2780
chr1	223899939	223900657	719	*	46.6798	Promoter	1	223900119	223963720	63602	1	824	uc001hob.4	0	718
chr1	223907619	223909819	2201	*	102.936	Intron (uc010puy.2/824, intron 2 of 20)	1	223900119	223963720	63602	1	824	uc001hob.4	7500	2200
chr1	224032665	224034987	2323	*	275.527	Promoter	1	223967595	224033674	66080	2	7159	uc001hod.3	0	2322
chr1	224179246	224182471	3226	*	219.405	Distal Intergenic	1	224301789	224349749	47961	1	23219	uc001hoh.3	-119318	3225
chr1	224301476	224302889	1414	*	295.148	Promoter	1	224301789	224349749	47961	1	23219	uc001hoh.3	0	1413
chr1	224370371	224371960	1590	*	67.7451	Promoter	1	224370910	224381142	10233	1	8560	uc001hoj.3	0	1589
chr1	224393101	224394327	1227	*	73.8712	Distal Intergenic	1	224370910	224381142	10233	1	8560	uc001hoj.3	22191	1226
chr1	224488308	224489468	1161	*	46.4864	Exon (uc001hok.3/4931, exon 10 of 23)	1	224415036	224517891	102856	2	4931	uc001hok.3	28423	1160
chr1	224491329	224492477	1149	*	36.4579	Exon (uc001hok.3/4931, exon 8 of 23)	1	224415036	224517891	102856	2	4931	uc001hok.3	25414	1148
chr1	224492619	224493631	1013	*	65.7111	5' UTR	1	224415036	224517891	102856	2	4931	uc001hok.3	24260	1012
chr1	224493752	224494740	989	*	46.5978	Intron (uc001hok.3/4931, intron 6 of 22)	1	224415036	224517891	102856	2	4931	uc001hok.3	23151	988
chr1	224514528	224519228	4701	*	479.521	Promoter	1	224415036	224517891	102856	2	4931	uc001hok.3	0	4700
chr1	224544458	224546032	1575	*	160.293	Promoter	1	224544513	224566223	21711	1	29097	uc001hom.2	0	1574
chr1	224620401	224623652	3252	*	221.119	Promoter	1	224572845	224622001	49157	2	80232	uc001hop.4	0	3251
chr1	224641266	224643293	2028	*	81.9009	Distal Intergenic	1	224616999	224622001	5003	2	80232	uc021pjt.1	-19265	2027
chr1	224668913	224671641	2729	*	43.8376	Distal Intergenic	1	224616999	224622001	5003	2	80232	uc021pjt.1	-46912	2728
chr1	225116857	225118127	1271	*	286.669	Promoter	1	225117356	225155626	38271	1	127602	uc001hov.4	0	1270
chr1	225614982	225616302	1321	*	44.1692	Promoter	1	225589204	225615815	26612	2	3930	uc001hoy.3	0	1320
chr1	225839109	225841952	2844	*	289.245	Promoter	1	225674534	225840845	166312	2	55740	uc001hpc.1	0	2843
chr1	225964699	225967256	2558	*	463.712	Promoter	1	225965515	225978162	12648	1	6726	uc001hpf.4	0	2557
chr1	225997662	225998623	962	*	48.0573	Promoter	1	225997797	226033262	35466	1	2052	uc001hpk.3	0	961
chr1	226062085	226064345	2261	*	178.604	Intron (uc001hpm.2/9725, intron 3 of 24)	1	226054265	226065294	11030	2	9725	uc010pvi.1	949	2260
chr1	226068680	226071485	2806	*	237.047	Promoter	1	226033233	226070420	37188	2	9725	uc001hpm.2	0	2805
chr1	226110568	226112844	2277	*	360.98	Promoter	1	226073982	226112040	38059	2	10637	uc010pvj.3	0	2276
chr1	226186165	226187772	1608	*	90.1698	Promoter	1	226170403	226187066	16664	2	163859	uc001hpu.4	0	1607
chr1	226249037	226252096	3060	*	503.353	Promoter	1	226250408	226254301	3894	1	3020	uc010pvl.2	0	3059
chr1	226270475	226271955	1481	*	68.364	Exon (uc001hpx.3/uc001hpx.3, exon 1 of 4)	1	226251678	226259703	8026	1	440926	uc021pjv.1	18797	1480
chr1	226297106	226299187	2082	*	417.089	Distal Intergenic	1	226251678	226259703	8026	1	440926	uc021pjv.1	45428	2081
chr1	226309010	226310944	1935	*	207.544	Distal Intergenic	1	226251678	226259703	8026	1	440926	uc021pjv.1	57332	1934
chr1	226314710	226316675	1966	*	129.63	Distal Intergenic	1	226332380	226374423	42044	2	64746	uc001hpy.3	57748	1965
chr1	226320018	226321679	1662	*	87.7256	Distal Intergenic	1	226332380	226374423	42044	2	64746	uc001hpy.3	52744	1661
chr1	226373360	226375214	1855	*	334.298	Promoter	1	226332380	226374423	42044	2	64746	uc001hpy.3	0	1854
chr1	226495965	226497680	1716	*	344.433	Promoter	1	226418850	226497204	78355	2	286826	uc001hqa.3	0	1715
chr1	226594797	226596471	1675	*	101.359	Promoter	1	226548392	226595801	47410	2	142	uc001hqd.4	0	1674
chr1	226890148	226891824	1677	*	445.518	Intron (uc010pvo.2/3707, intron 2 of 7)	1	226819391	226926876	107486	2	3707	uc010pvo.2	35052	1676
chr1	226925812	226927087	1276	*	57.0127	Promoter	1	226819391	226926876	107486	2	3707	uc010pvo.2	0	1275
chr1	227057777	227059059	1283	*	88.5594	Promoter	1	227058273	227083804	25532	1	5664	uc009xeo.1	0	1282
chr1	227126122	227128771	2650	*	365.004	Promoter	1	227127938	227153111	25174	1	56997	uc010pvp.1	0	2649
chr1	227175373	227176751	1379	*	33.4865	Downstream (<1kb)	1	227170595	227175246	4652	1	56997	uc009xer.1	4778	1378
chr1	227505104	227507089	1986	*	207.387	Promoter	1	227177566	227505826	328261	2	8476	uc001hqr.3	0	1985
chr1	227729789	227730894	1106	*	62.5523	Distal Intergenic	1	227751220	227850164	98945	1	339500	uc001hqw.2	-20326	1105
chr1	227750814	227752345	1532	*	218.494	Promoter	1	227751220	227850164	98945	1	339500	uc001hqw.2	0	1531
chr1	227915339	227917213	1875	*	106.125	Promoter	1	227916240	227922055	5816	1	100130093	uc001hqx.4	0	1874
chr1	227921174	227924109	2936	*	320.206	Promoter	1	227922697	227964671	41975	1	116841	uc001hrd.3	0	2935
chr1	228083377	228084183	807	*	33.9554	Distal Intergenic	1	228129291	228129384	94	2	100847072	uc031psm.1	45201	806
chr1	228133047	228135674	2628	*	47.6361	Promoter	1	228109165	228135676	26512	2	7483	uc001hri.2	2	2627
chr1	228135766	228136296	531	*	45.335	Promoter	1	228109165	228135676	26512	2	7483	uc001hri.2	-90	530
chr1	228269116	228272269	3154	*	451.932	Promoter	1	228270361	228286913	16553	1	375	uc001hrr.3	0	3153
chr1	228289407	228291686	2280	*	257.174	Promoter	1	228288428	228291022	2595	2	79169	uc001hrx.3	0	2279
chr1	228296320	228297831	1512	*	163.406	Promoter	1	228294380	228297013	2634	2	128308	uc001hrz.4	0	1511
chr1	228326977	228328933	1957	*	236.501	Promoter	1	228327785	228336655	8871	1	2987	uc021pke.1	0	1956
chr1	228352569	228354860	2292	*	587.048	Promoter	1	228353429	228369958	16530	1	200205	uc001hsl.4	0	2291
chr1	228400754	228401913	1160	*	138.353	Promoter	1	228391207	228401365	10159	2	574407	uc031psn.1	0	1159
chr1	228565327	228566929	1603	*	118.03	3' UTR	1	228540652	228548951	8300	1	84033	uc009xfa.3	24675	1602
chr1	228592903	228595515	2613	*	389.949	Promoter	1	228581377	228594517	13141	2	81559	uc001hss.3	0	2612
chr1	228643573	228648207	4635	*	315.236	Promoter	1	228645808	228646259	452	1	128312	uc001hsz.3	0	4634
chr1	228673836	228676392	2557	*	457.311	Promoter	1	228675068	228683889	8822	1	149603	uc001htb.3	0	2556
chr1	228856223	228857965	1743	*	98.9705	Intron (uc021pkj.1/58480, intron 1 of 2)	1	228870824	228882416	11593	1	58480	uc001htf.3	-12859	1742
chr1	228870572	228872520	1949	*	105.428	Promoter	1	228870824	228882416	11593	1	58480	uc001htf.3	0	1948
chr1	229205221	229207340	2120	*	31.8018	Distal Intergenic	1	229406809	229441640	34832	1	5867	uc001hth.4	-199469	2119
chr1	229228055	229232201	4147	*	117.146	Distal Intergenic	1	229406809	229441640	34832	1	5867	uc001hth.4	-174608	4146
chr1	229355945	229358538	2594	*	122.602	Distal Intergenic	1	229406809	229441640	34832	1	5867	uc001hth.4	-48271	2593
chr1	229406755	229408099	1345	*	80.0418	Promoter	1	229406809	229441640	34832	1	5867	uc001hth.4	0	1344
chr1	229477312	229479151	1840	*	204.299	Promoter	1	229456752	229478688	21937	2	126731	uc001htl.4	0	1839
chr1	229642964	229644849	1886	*	213.184	Promoter	1	229577044	229644088	67045	2	55746	uc001htn.3	0	1885
chr1	229693395	229695912	2518	*	200.595	Promoter	1	229652329	229694442	42114	2	23456	uc001htp.4	0	2517
chr1	229760596	229762969	2374	*	155.682	Promoter	1	229728866	229761794	32929	2	27097	uc001htq.3	0	2373
chr1	229904240	229905054	815	*	34.3139	Distal Intergenic	1	229761981	229795946	33966	1	9816	uc009xfd.1	142259	814
chr1	230202118	230204256	2139	*	97.2577	Promoter	1	230202956	230410310	207355	1	2590	uc010pvz.1	0	2138
chr1	230778071	230779387	1317	*	178.193	Promoter	1	230778202	230829731	51530	1	22796	uc001htw.3	0	1316
chr1	230885604	230890014	4411	*	268.648	Intron (uc001htz.1/10753, intron 1 of 19)	1	230883130	230937749	54620	1	10753	uc009xfg.1	2474	4410
chr1	231003220	231005339	2120	*	196.391	Promoter	1	230972865	231004302	31438	2	84886	uc001hub.3	0	2119
chr1	231113795	231115553	1759	*	133.252	Promoter	1	231114823	231133147	18325	1	64801	uc009xfl.1	0	1758
chr1	231376182	231377754	1573	*	162.432	Promoter	1	231359509	231376924	17416	2	128061	uc001hul.3	0	1572
chr1	231472179	231474720	2542	*	366.152	Promoter	1	231468482	231473578	5097	2	149371	uc001huq.3	0	2541
chr1	231556485	231558968	2484	*	302.894	5' UTR	1	231499497	231556057	56561	2	54583	uc001huu.3	-428	2483
chr1	231663664	231665706	2043	*	348.506	Promoter	1	231664399	231838307	173909	1	100303453	uc010pwe.2	0	2042
chr1	231912723	231915258	2536	*	81.5674	Intron (uc010pwg.1/100303453, intron 10 of 12)	1	231950372	231954263	3892	2	27184	uc001hvd.3	39005	2535
chr1	232114325	232125759	11435	*	395.119	Intron (uc010pwl.2/100303453, intron 13 of 15)	1	231950372	231954263	3892	2	27184	uc001hvd.3	-160062	11434
chr1	232284323	232286848	2526	*	51.1065	Distal Intergenic	1	232533712	232598163	64452	2	57568	uc001hvf.3	311315	2525
chr1	232513601	232515700	2100	*	103.847	Distal Intergenic	1	232533712	232598163	64452	2	57568	uc001hvf.3	82463	2099
chr1	232763651	232766855	3205	*	223.167	Distal Intergenic	1	232533712	232651243	117532	2	57568	uc001hvg.3	-112408	3204
chr1	232940539	232942022	1484	*	242.785	Promoter	1	232940638	232946092	5455	1	54627	uc001hvh.2	0	1483
chr1	233004110	233005956	1847	*	87.1269	Distal Intergenic	1	232940638	232946092	5455	1	54627	uc001hvh.2	63472	1846
chr1	233085750	233087069	1320	*	119.962	Promoter	1	233086370	233114219	27850	1	84284	uc001hvj.1	0	1319
chr1	233463322	233464617	1296	*	122.787	Promoter	1	233463514	233509880	46367	1	84451	uc001hvs.1	0	1295
chr1	233748846	233751725	2880	*	278.051	Promoter	1	233749750	233808258	58509	1	3775	uc010pxo.1	0	2879
chr1	233841125	233844735	3611	*	124.206	Distal Intergenic	1	233765353	233808258	42906	1	3775	uc031pst.1	75772	3610
chr1	233870374	233872676	2303	*	104.675	Distal Intergenic	1	233765353	233808258	42906	1	3775	uc031pst.1	105021	2302
chr1	234508328	234510057	1730	*	479.067	Promoter	1	234509214	234519795	10582	1	388753	uc001hwb.3	0	1729
chr1	234613474	234615196	1723	*	315.588	Promoter	1	234527059	234614849	87791	2	6894	uc001hwd.3	0	1722
chr1	234657246	234659509	2264	*	77.4698	Distal Intergenic	1	234663637	234667525	3889	2	100506795	uc001hwe.3	8016	2263
chr1	234679291	234681395	2105	*	58.1513	Distal Intergenic	1	234663637	234667525	3889	2	100506795	uc001hwe.3	-11766	2104
chr1	234734048	234750931	16884	*	604.726	Promoter	1	234740015	234743860	3846	2	359948	uc009xfw.3	0	16883
chr1	234857570	234863748	6179	*	380.889	Promoter	1	234859789	234867390	7602	1	100506810	uc001hwj.2	0	6178
chr1	235010129	235013588	3460	*	216.557	Distal Intergenic	1	234859789	234867390	7602	1	100506810	uc001hwj.2	150340	3459
chr1	235091768	235102012	10245	*	304.623	Exon (uc001hwk.4/uc001hwk.4, exon 1 of 4)	1	235291118	235291252	135	2	677802	uc001hwm.1	189240	10244
chr1	235109947	235110900	954	*	50.0462	Distal Intergenic	1	235291118	235291252	135	2	677802	uc001hwm.1	180352	953
chr1	235111024	235112773	1750	*	63.5899	Distal Intergenic	1	235291118	235291252	135	2	677802	uc001hwm.1	178479	1749
chr1	235120885	235124579	3695	*	110.871	Distal Intergenic	1	235291118	235291252	135	2	677802	uc001hwm.1	166673	3694
chr1	235132218	235135252	3035	*	147.846	Distal Intergenic	1	235291118	235291252	135	2	677802	uc001hwm.1	156000	3034
chr1	235242137	235244755	2619	*	72.0812	Distal Intergenic	1	235291118	235291252	135	2	677802	uc001hwm.1	46497	2618
chr1	235244986	235247948	2963	*	147.465	Distal Intergenic	1	235291118	235291252	135	2	677802	uc001hwm.1	43304	2962
chr1	235291173	235293005	1833	*	348.333	Promoter	1	235291118	235291252	135	2	677802	uc001hwm.1	0	1832
chr1	235323779	235325256	1478	*	180.666	Promoter	1	235294498	235324772	30275	2	23029	uc001hwn.3	0	1477
chr1	235489835	235491640	1806	*	355.101	Promoter	1	235330210	235490802	160593	2	51742	uc021pks.1	0	1805
chr1	235491732	235494314	2583	*	178.193	Promoter	1	235491753	235507844	16092	1	9453	uc001hwv.3	0	2582
chr1	235530172	235531752	1581	*	167.988	Promoter	1	235530728	235600789	70062	1	6905	uc010pxq.1	0	1580
chr1	235666502	235669584	3083	*	310.561	Promoter	1	235610505	235667781	57277	2	148789	uc001hxc.3	0	3082
chr1	236029575	236030687	1113	*	124.164	Promoter	1	235824331	236030227	205897	2	1130	uc001hxj.3	0	1112
chr1	236304785	236305689	905	*	33.6764	Distal Intergenic	1	236305832	236372209	66378	1	7107	uc001hxq.3	-143	904
chr1	236305776	236306544	769	*	45.5991	Promoter	1	236305832	236372209	66378	1	7107	uc001hxq.3	0	768
chr1	236665783	236667412	1630	*	87.3122	Distal Intergenic	1	236681514	236716279	34766	1	3964	uc001hxw.2	-14102	1629
chr1	236678607	236681575	2969	*	57.7394	Promoter	1	236681514	236716279	34766	1	3964	uc001hxw.2	0	2968
chr1	236686237	236688697	2461	*	197.669	Promoter	1	236686369	236687808	1440	2	100287902	uc001hxx.3	0	2460
chr1	236767113	236768390	1278	*	43.0025	Promoter	1	236712305	236767841	55537	2	55127	uc001hyd.2	0	1277
chr1	236958048	236959558	1511	*	257.463	Promoter	1	236958581	236979843	21263	1	4548	uc010pxv.1	0	1510
chr1	241682268	241683126	859	*	148.194	Promoter	1	241660857	241683085	22229	2	2271	uc001hyx.3	0	858
chr1	241802616	241805082	2467	*	136.78	Promoter	1	241756452	241803701	47250	2	23596	uc001hza.3	0	2466
chr1	241911656	241914211	2556	*	66.7196	Exon (uc001hzg.2/128025, exon 13 of 27)	1	241850763	241965434	114672	1	128025	uc021pli.1	60893	2555
chr1	242010839	242012024	1186	*	440.877	Promoter	1	242011493	242053241	41749	1	9156	uc001hzh.3	0	1185
chr1	243417439	243420145	2707	*	199.933	Promoter	1	243419307	243663393	244087	1	10806	uc001hzw.3	0	2706
chr1	244485128	244487806	2679	*	78.1314	Distal Intergenic	1	244515937	244552388	36452	1	200159	uc001iah.4	-28131	2678
chr1	244613936	244616300	2365	*	321.841	Promoter	1	244571794	244615436	43643	2	159	uc001iaj.3	0	2364
chr1	244623515	244625589	2075	*	205.025	Promoter	1	244624673	244803662	178990	1	257044	uc001ial.3	0	2074
chr1	244815606	244817198	1593	*	161.773	Promoter	1	244816352	244872334	55983	1	51029	uc001iao.3	0	1592
chr1	244996551	245000595	4045	*	594.413	Promoter	1	244998639	245008359	9721	1	116228	uc001iar.3	0	4044
chr1	245025711	245028795	3085	*	563.064	Promoter	1	245013602	245027827	14226	2	3192	uc001iaz.1	0	3084
chr1	245132270	245135719	3450	*	527.096	Promoter	1	245133171	245251148	117978	1	84288	uc001ibc.2	0	3449
chr1	246669897	246670997	1101	*	55.8044	Promoter	1	245912642	246670644	758003	2	64754	uc001ibl.3	0	1100
chr1	246728654	246730840	2187	*	225.852	Promoter	1	246729639	246811544	81906	1	163882	uc001ibo.4	0	2186
chr1	246866546	246868816	2271	*	41.7563	Distal Intergenic	1	246887378	246931440	44063	1	51097	uc001ibr.3	-18562	2270
chr1	246886906	246889707	2802	*	237.619	Promoter	1	246887378	246931440	44063	1	51097	uc001ibr.3	0	2801
chr1	247093065	247096104	3040	*	329.273	Promoter	1	247002402	247094726	92325	2	25909	uc001ibv.2	0	3039
chr1	247170439	247171380	942	*	67.1397	Promoter	1	247108849	247171395	62547	2	57116	uc001ibx.3	15	941
chr1	247241491	247242230	740	*	62.9716	Promoter	1	247108849	247242115	133267	2	100533111	uc001ica.3	0	739
chr1	247266692	247267827	1136	*	242.476	Promoter	1	247263264	247267674	4411	2	79862	uc001ice.2	0	1135
chr1	247274555	247275577	1023	*	55.8072	5' UTR	1	247273462	247275719	2258	2	388759	uc001icg.1	142	1022
chr1	247289515	247290490	976	*	179.208	Intron (uc001ich.3/7678, intron 2 of 2)	1	247273462	247275719	2258	2	388759	uc001icg.1	-13796	975
chr1	247334442	247335520	1079	*	148.194	Promoter	1	247285277	247335318	50042	2	7678	uc001ici.3	0	1078
chr1	247373387	247374556	1170	*	141.06	Distal Intergenic	1	247365269	247365362	94	2	100500849	uc021pma.1	-8025	1169
chr1	247493983	247496117	2135	*	235.028	Promoter	1	247463622	247495045	31424	2	84838	uc001ico.3	0	2134
chr1	249119438	249121462	2025	*	345.685	Promoter	1	249120576	249120642	67	1	100422879	uc021pmd.1	0	2024
chr1	249131579	249134198	2620	*	503.176	Promoter	1	249132530	249143714	11185	1	79894	uc001iex.3	0	2619
chr1	249151433	249154142	2710	*	326.881	Promoter	1	249144203	249152264	8062	2	55657	uc031pta.1	0	2709
chr1	249157056	249158060	1005	*	44.5874	Distal Intergenic	1	249144203	249153315	9113	2	55657	uc001iff.2	-3741	1004
chr1	249199830	249200840	1011	*	232.395	Promoter	1	249200442	249213345	12904	1	267002	uc001ifg.3	0	1010
chr2	35165	39471	4307	*	58.1719	3' UTR	2	38814	46588	7775	2	642273	uc010yim.2	7117	4306
chr2	43694	47703	4010	*	199.123	Promoter	2	38814	46588	7775	2	642273	uc010yim.2	0	4009
chr2	263341	265930	2590	*	260.188	Promoter	2	218136	264068	45933	2	26751	uc002qvx.3	0	2589
chr2	675533	678673	3141	*	471.028	Promoter	2	667973	676158	8186	2	129787	uc002qwk.3	0	3140
chr2	725078	728277	3200	*	61.7904	Distal Intergenic	2	667973	677439	9467	2	129787	uc002qwl.3	-47639	3199
chr2	799331	800098	768	*	58.3212	Intron (uc002qwn.2/339822, intron 3 of 3)	2	779837	864112	84276	2	339822	uc002qwn.2	64014	767
chr2	1627504	1630951	3448	*	180.219	Distal Intergenic	2	1635659	1748291	112633	2	7837	uc002qxa.3	117340	3447
chr2	1633832	1637780	3949	*	127.104	3' UTR	2	1635659	1748291	112633	2	7837	uc002qxa.3	110511	3948
chr2	1747491	1748578	1088	*	78.6407	Promoter	2	1635659	1748291	112633	2	7837	uc002qxa.3	0	1087
chr2	3372373	3373979	1607	*	255.335	Intron (uc002qxj.2/7260, intron 1 of 8)	2	3192741	3381653	188913	2	7260	uc002qxj.2	7674	1606
chr2	3380798	3382624	1827	*	159.51	Promoter	2	3192741	3381653	188913	2	7260	uc002qxj.2	0	1826
chr2	3382880	3384521	1642	*	216.003	Promoter	2	3383446	3483342	99897	1	51112	uc002qxm.1	0	1641
chr2	3521885	3523718	1834	*	435.248	Promoter	2	3501690	3523350	21661	2	55256	uc002qxp.4	0	1833
chr2	3604954	3607196	2243	*	228.054	Promoter	2	3605976	3609340	3365	1	100506054	uc002qxu.3	0	2242
chr2	3622205	3624672	2468	*	265.32	Promoter	2	3622853	3628509	5657	1	6201	uc002qxw.3	0	2467
chr2	5835784	5837729	1946	*	80.5594	3' UTR	2	5832799	5841517	8719	1	6664	uc002qyj.3	2985	1945
chr2	6320905	6323703	2799	*	110.117	Distal Intergenic	2	6122110	6128364	6255	1	400940	uc010yir.1	198795	2798
chr2	7930950	7934287	3338	*	95.8623	Distal Intergenic	2	8062556	8116977	54422	2	339788	uc002qyw.3	182690	3337
chr2	8679138	8681397	2260	*	82.9436	Distal Intergenic	2	8822113	8824583	2471	1	3398	uc002qza.3	-140716	2259
[truncated: 13,250 more rows]

## Sheet: Union_H3k27ac_peaks_annot
union of Coetzee, ENCODE 1, and ENCODE 2, generated by Bedtools merge
[truncated: 23,479 more rows]

[truncated: 9 more sheets: Intersect_2_H3k27ac_peaks_annot, Intersect_3_H3k27ac_peaks_annot, HMEC_H3k27ac_peaks_annot, Encode1_H3k27ac_IDR.bed, Encode2_H3k27ac_IDR.bed, Coetzee_CTCF_830IDR, Encode_1_CTCF_830IDR, Encode_2_CTCF_830IDR, Encode_3_CTCF_830IDR]
